# Supplementary material for: Oxidation of low-molecular weight organic compounds in clouddroplets: development of the JAMOC chemical mechanism inCAABA/MECCA (version 4.5.0gmdd)
Source: Copernicus journal article supplement (doi:10.5194/gmd-2020-337), 2020-10-29

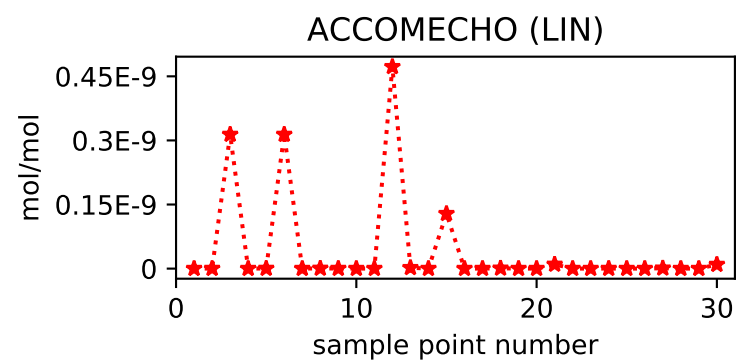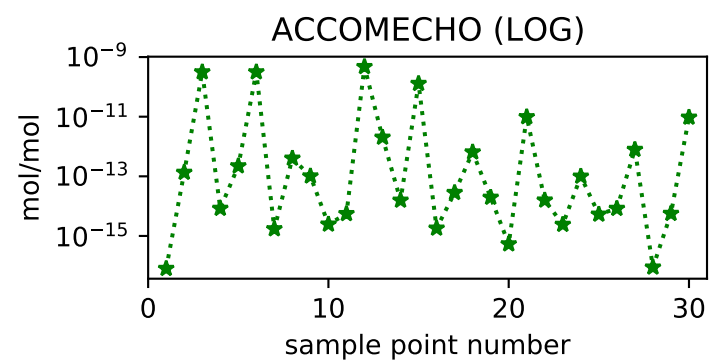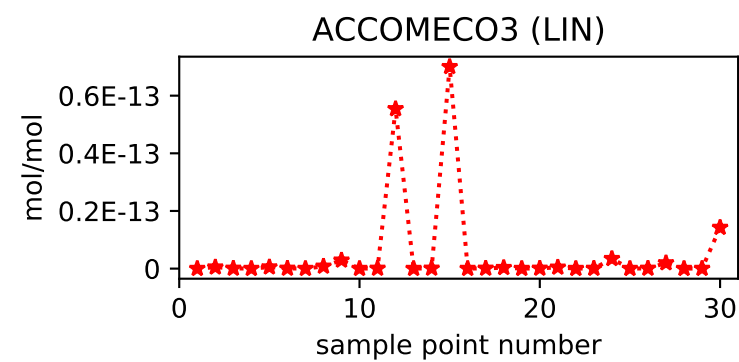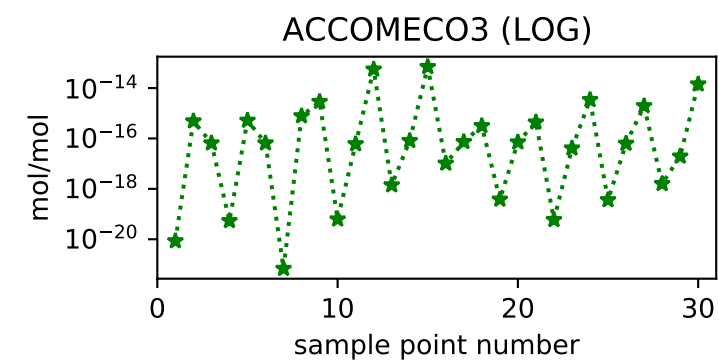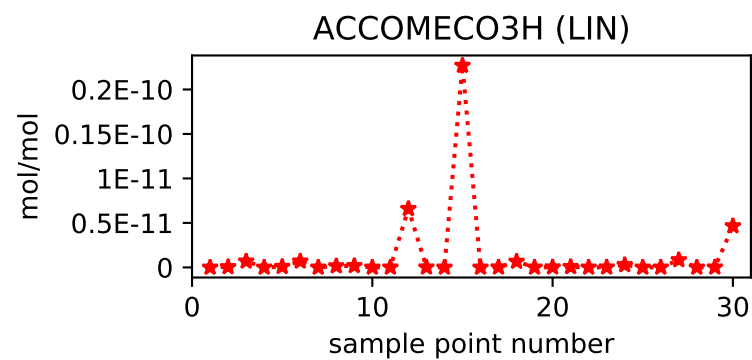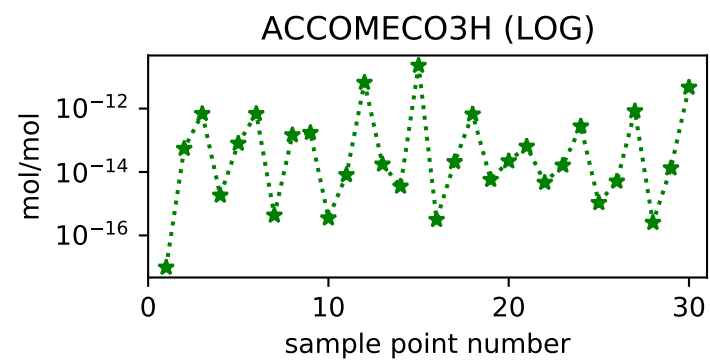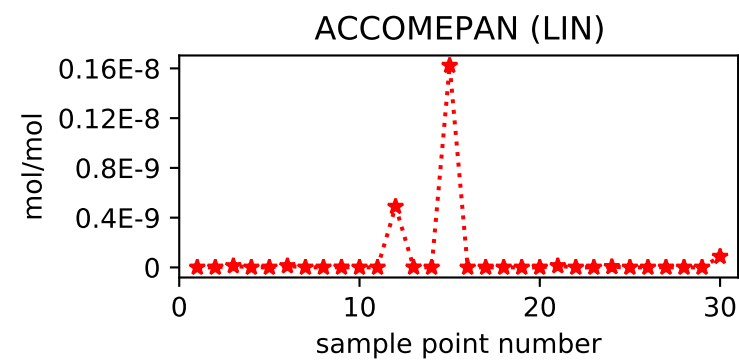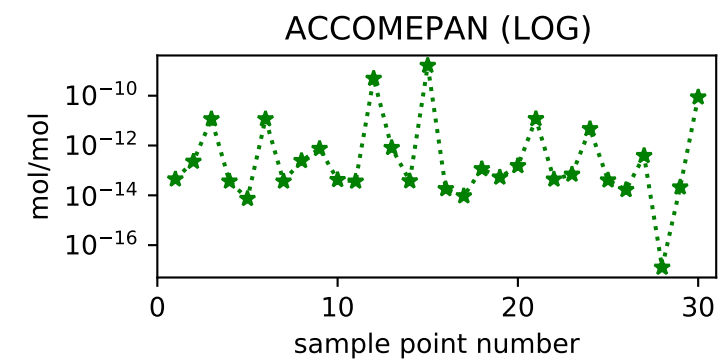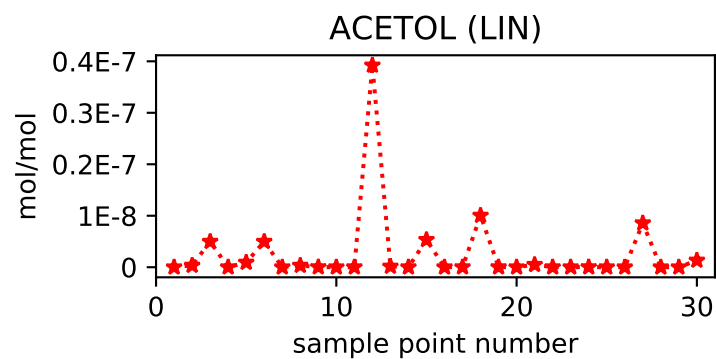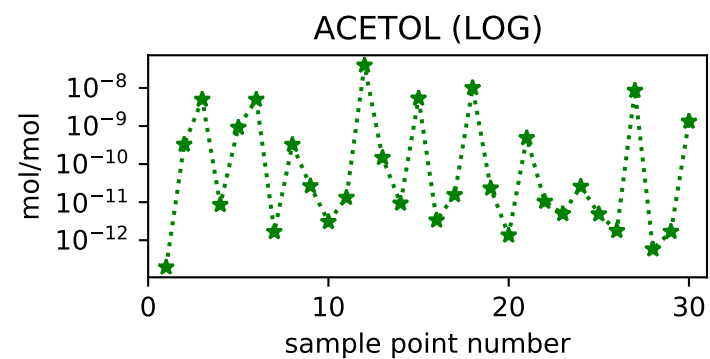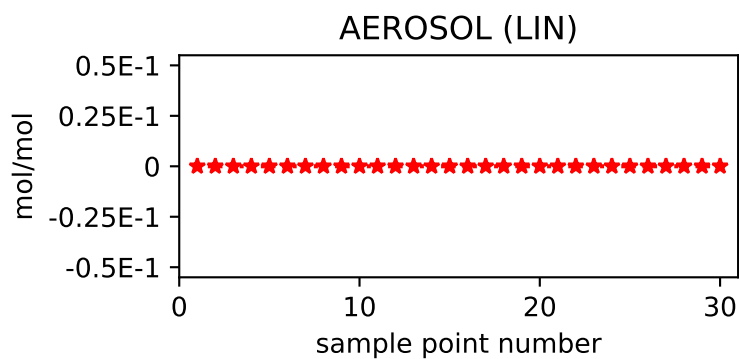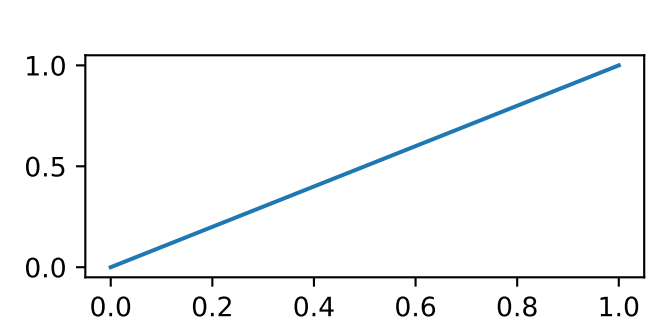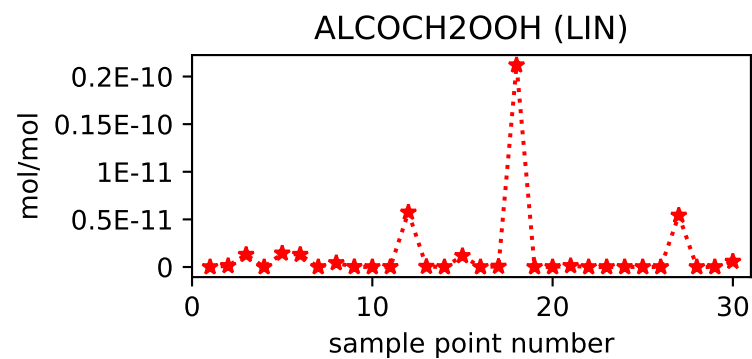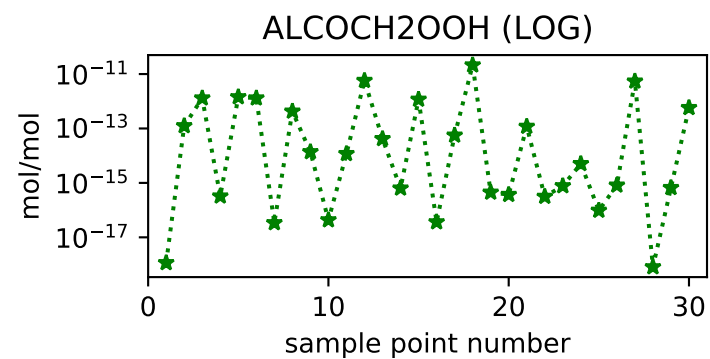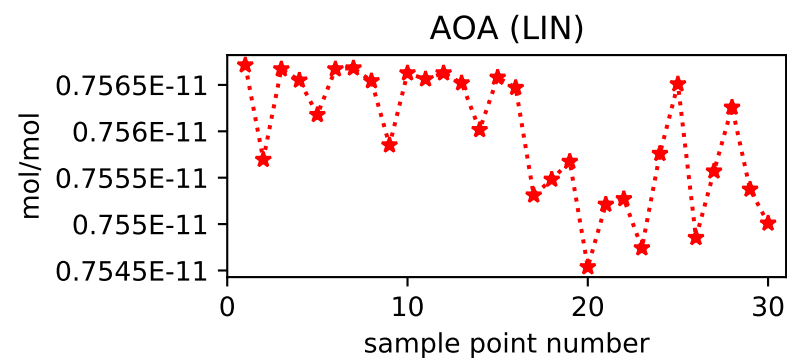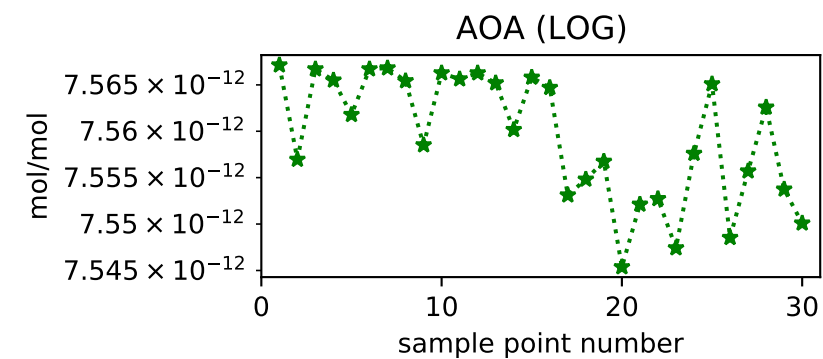

APINAOO (LIN)

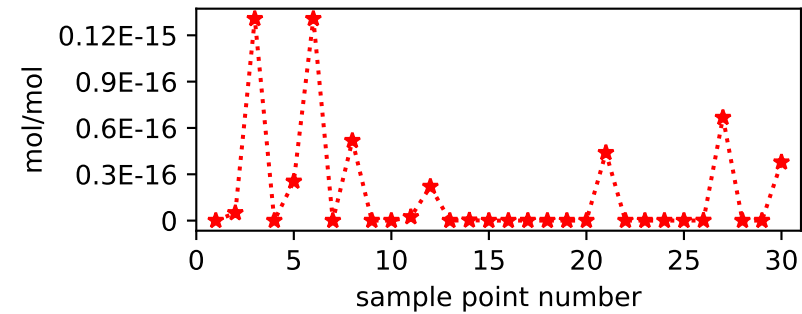

APINAOO (LOG)

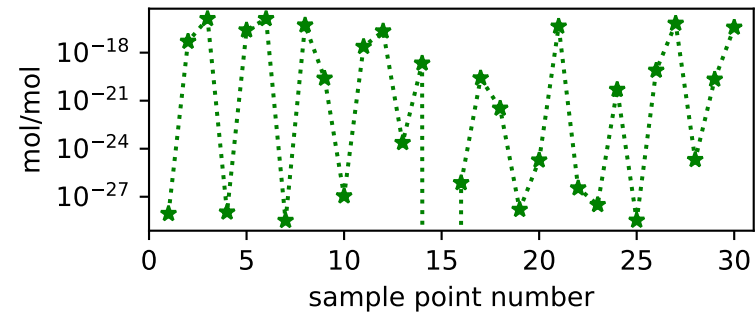

APINBOO (LIN)

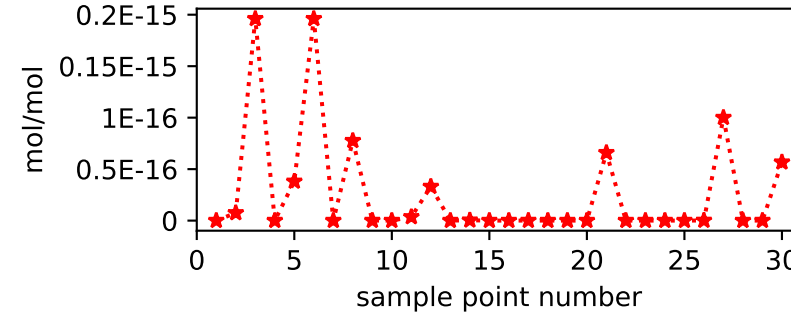

APINBOO (LOG)

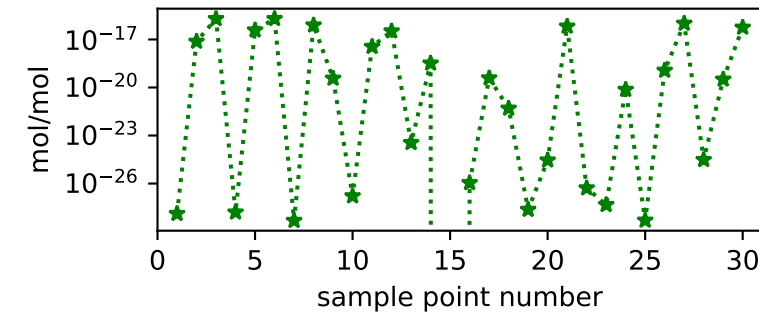

APINENE (LIN)

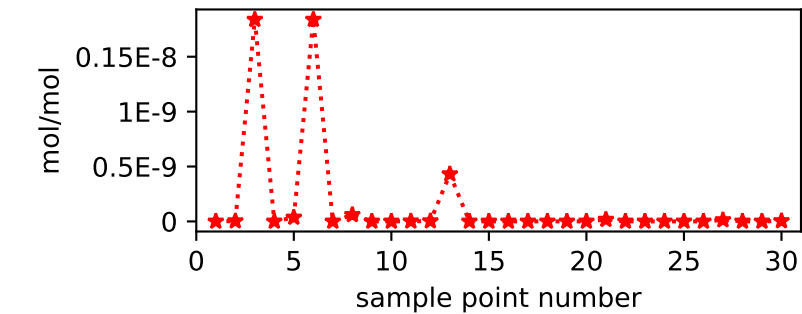

APINENE (LOG)

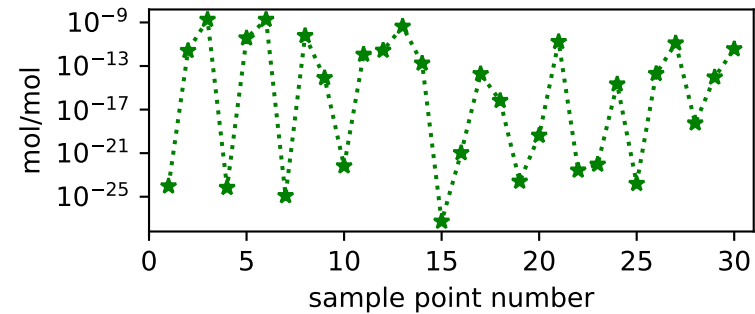

BENZAL (LIN)

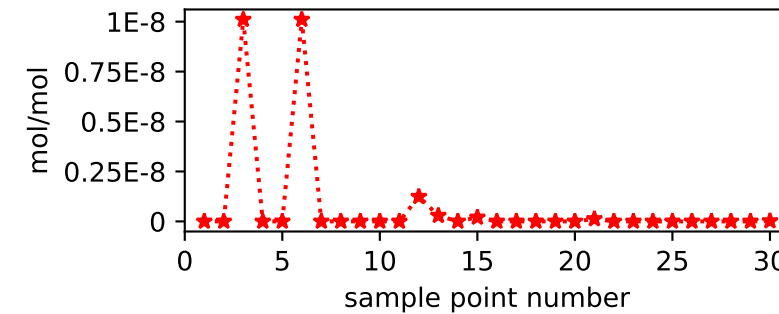

BENZAL (LOG)

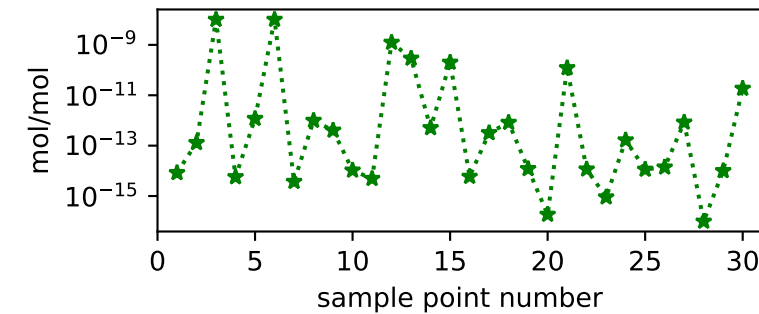

BENZENE (LIN)

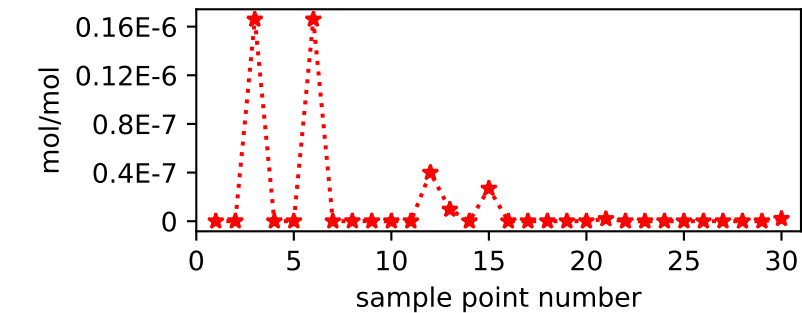

BENZENE (LOG)

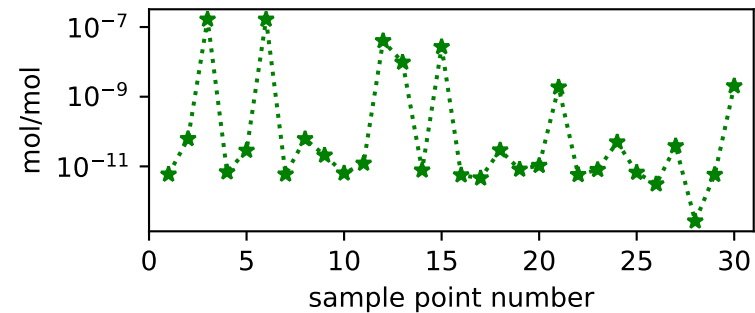

BIACET (LIN)

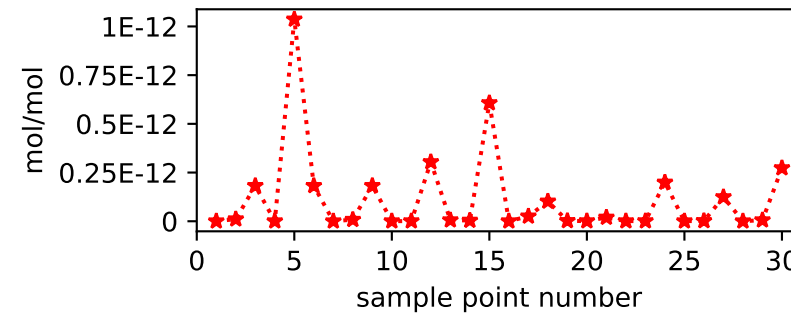

BIACET (LOG)

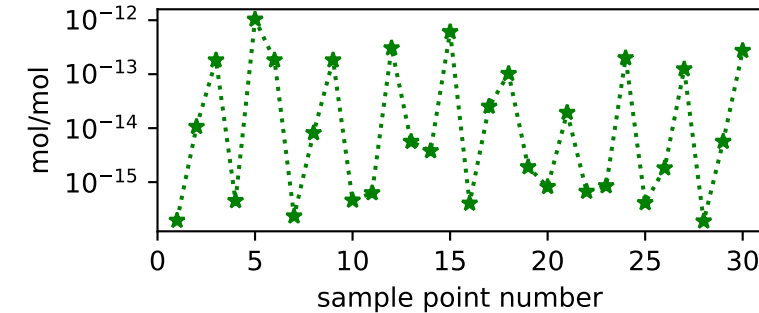

BIACETO2 (LIN)

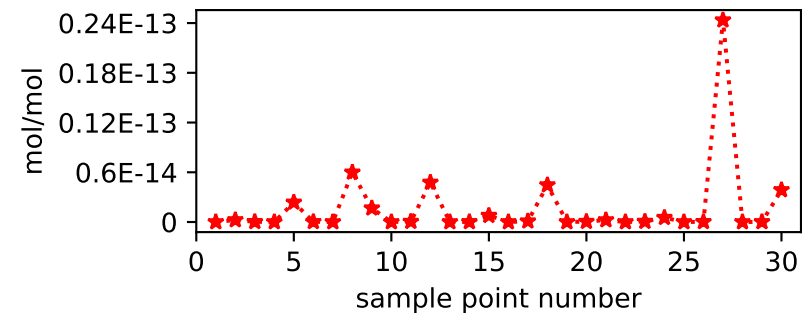

BIACETO2 (LOG)

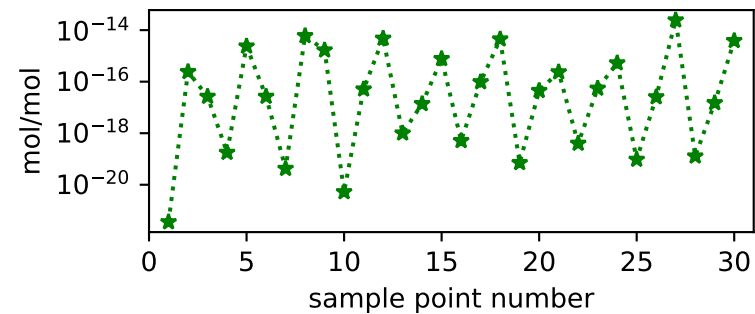

BIACETOH (LIN)

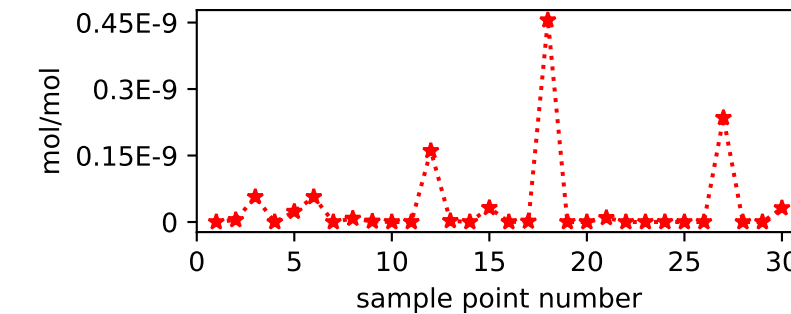

BIACETOH (LOG)

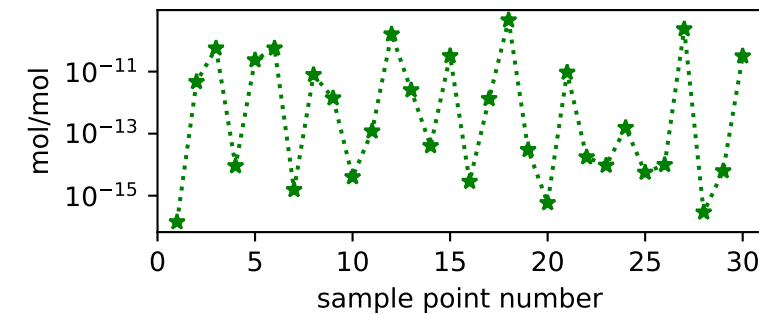

BIACETOOH (LIN)

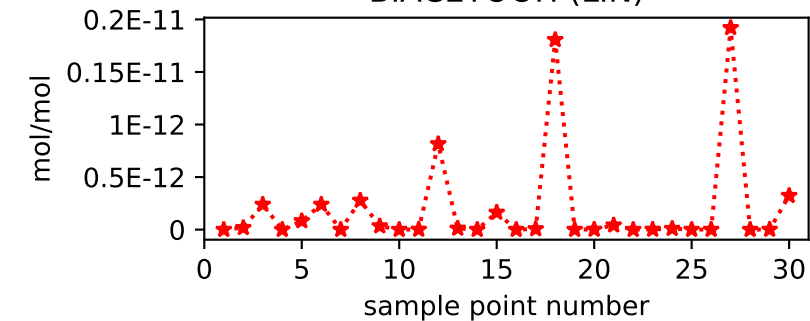

BIACETOOH (LOG)

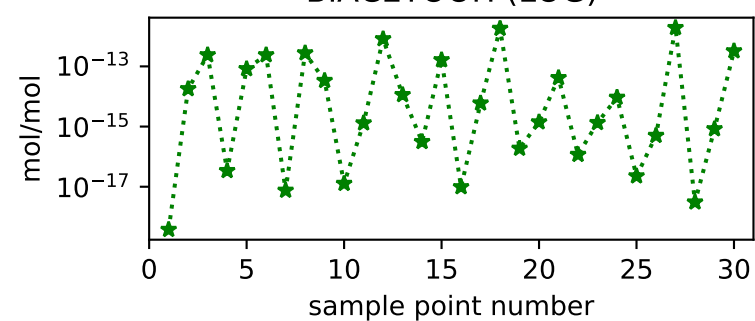

BPINANO3 (LIN)

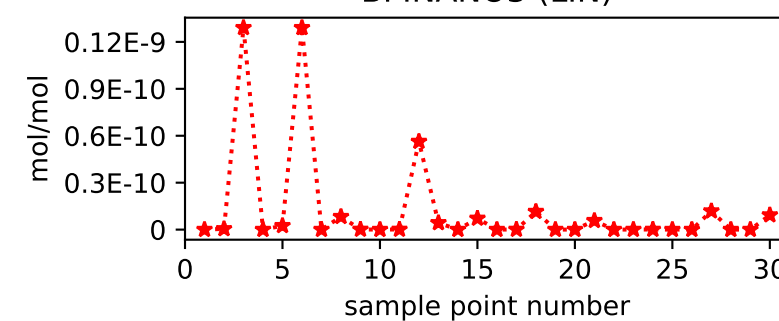

BPINANO3 (LOG)

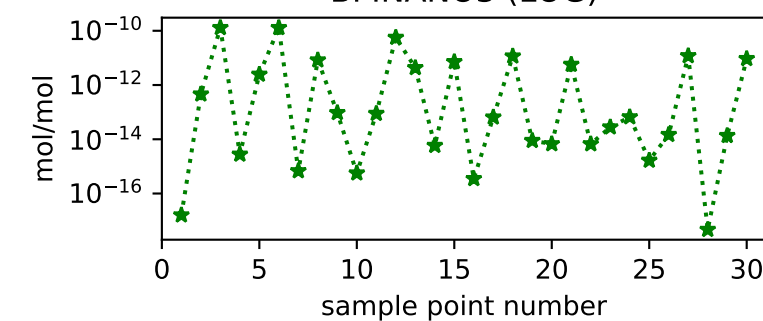

BPINAO2 (LIN)

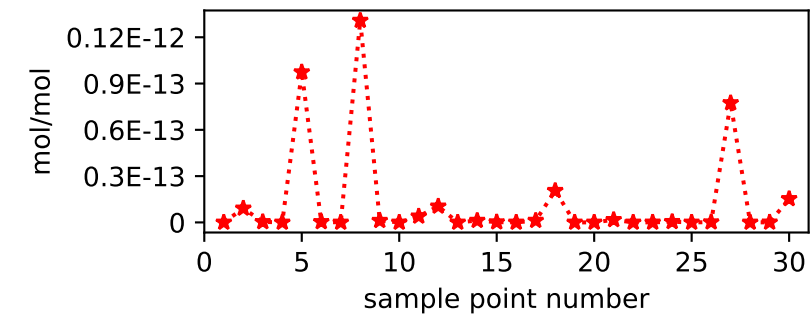

BPINAO2 (LOG)

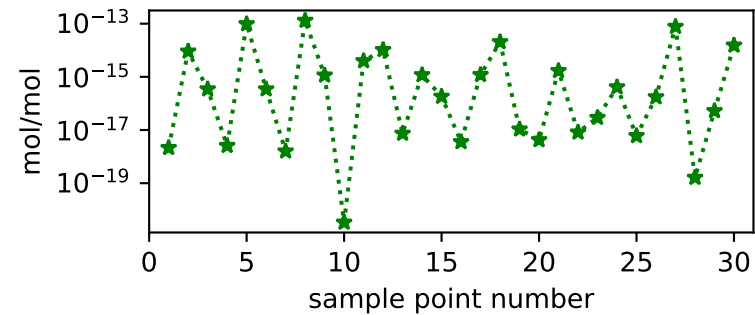

BPINAOOH (LIN)

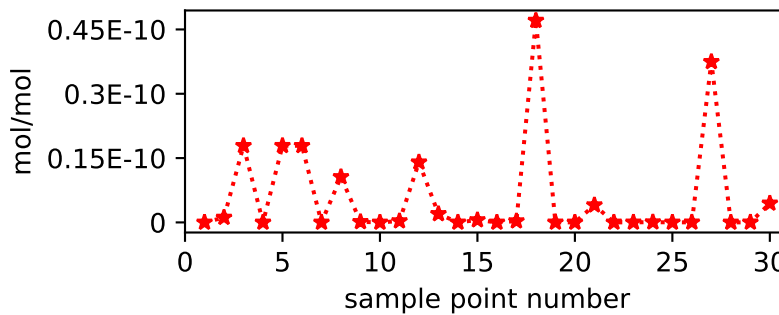

BPINAOOH (LOG)

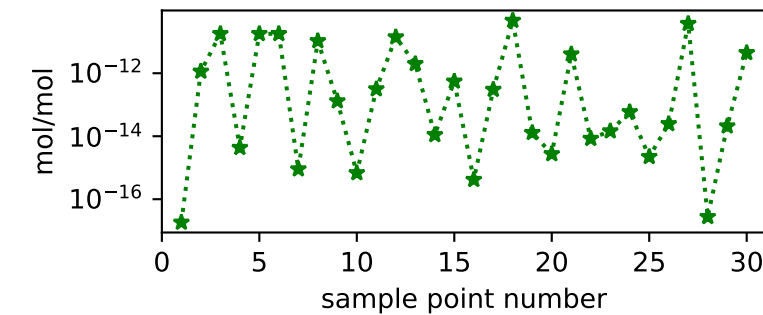

BPINENE (LIN)

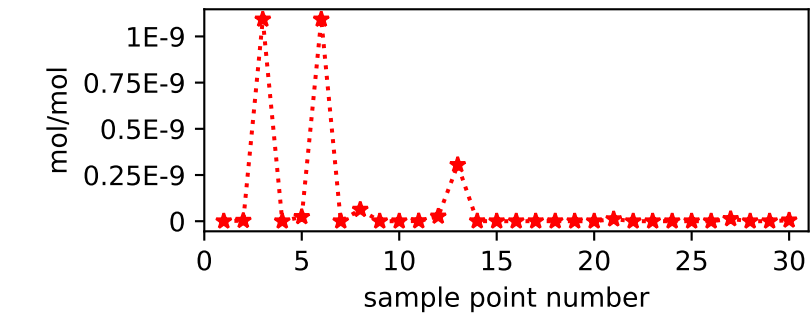

BPINENE (LOG)

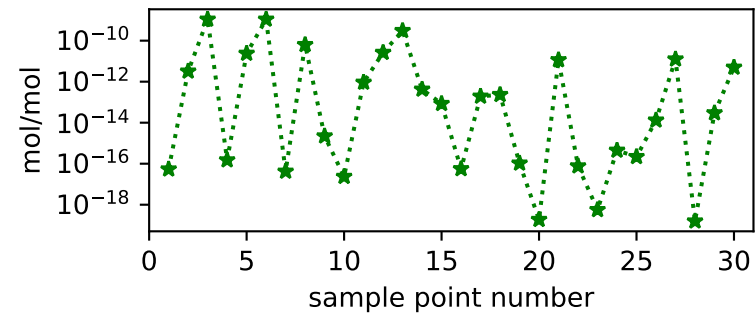

BUT1ENE (LIN)

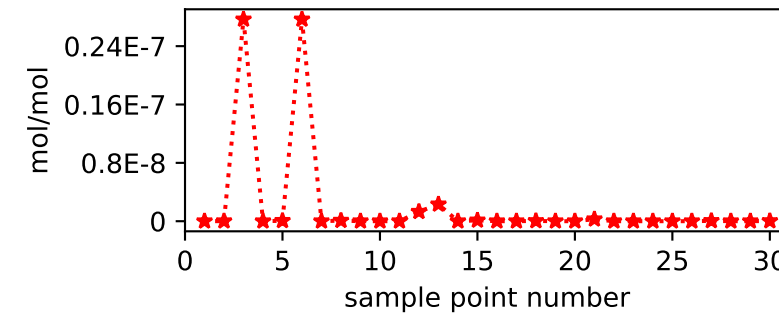

BUT1ENE (LOG)

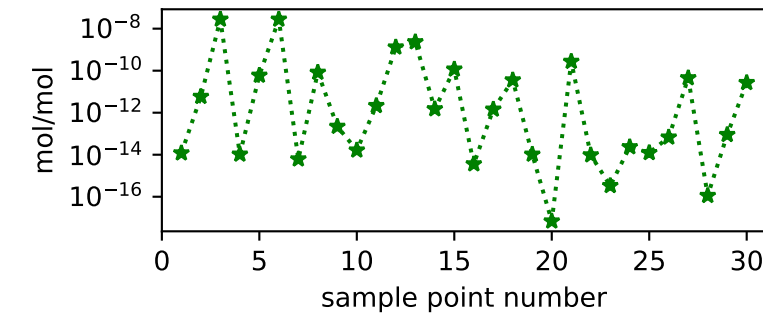

BUT2OLNO3 (LIN)

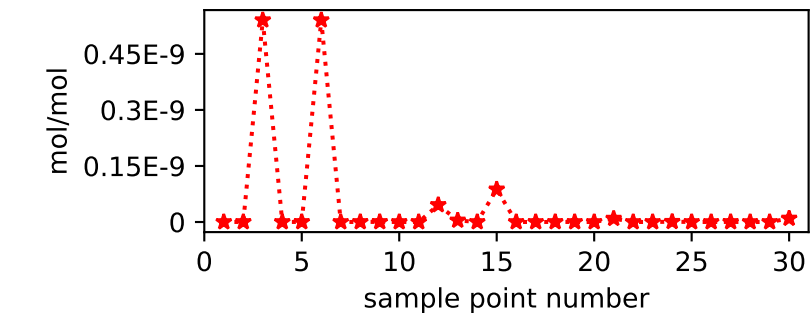

BUT2OLNO3 (LOG)

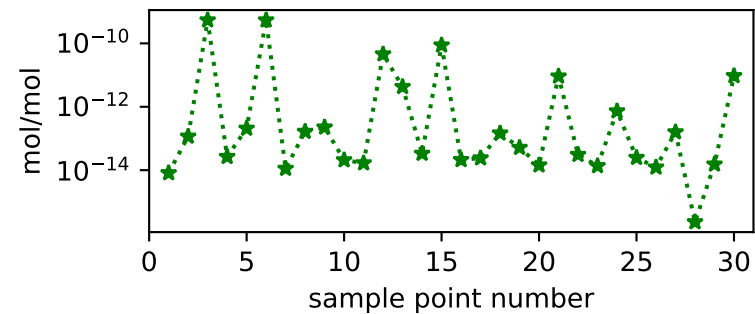

BUT2OLO (LIN)

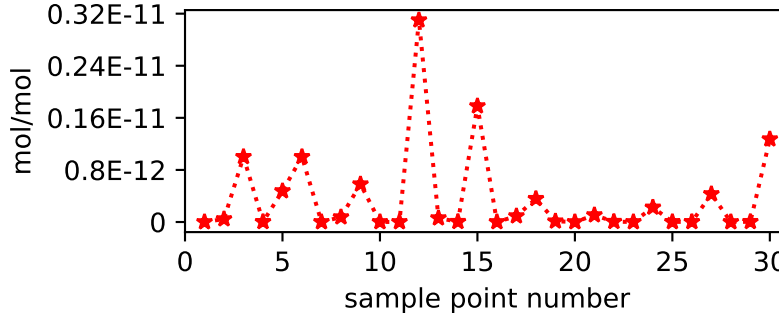

BUT2OLO (LOG)

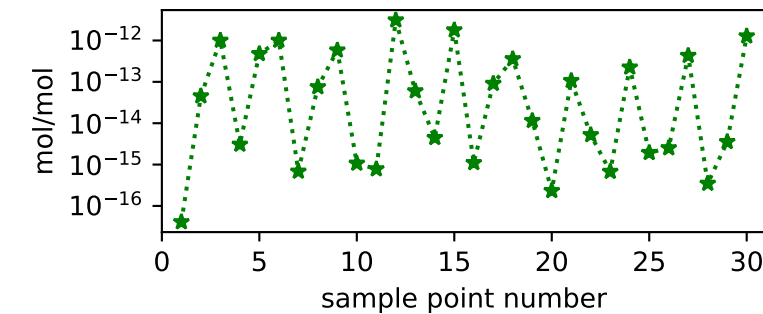

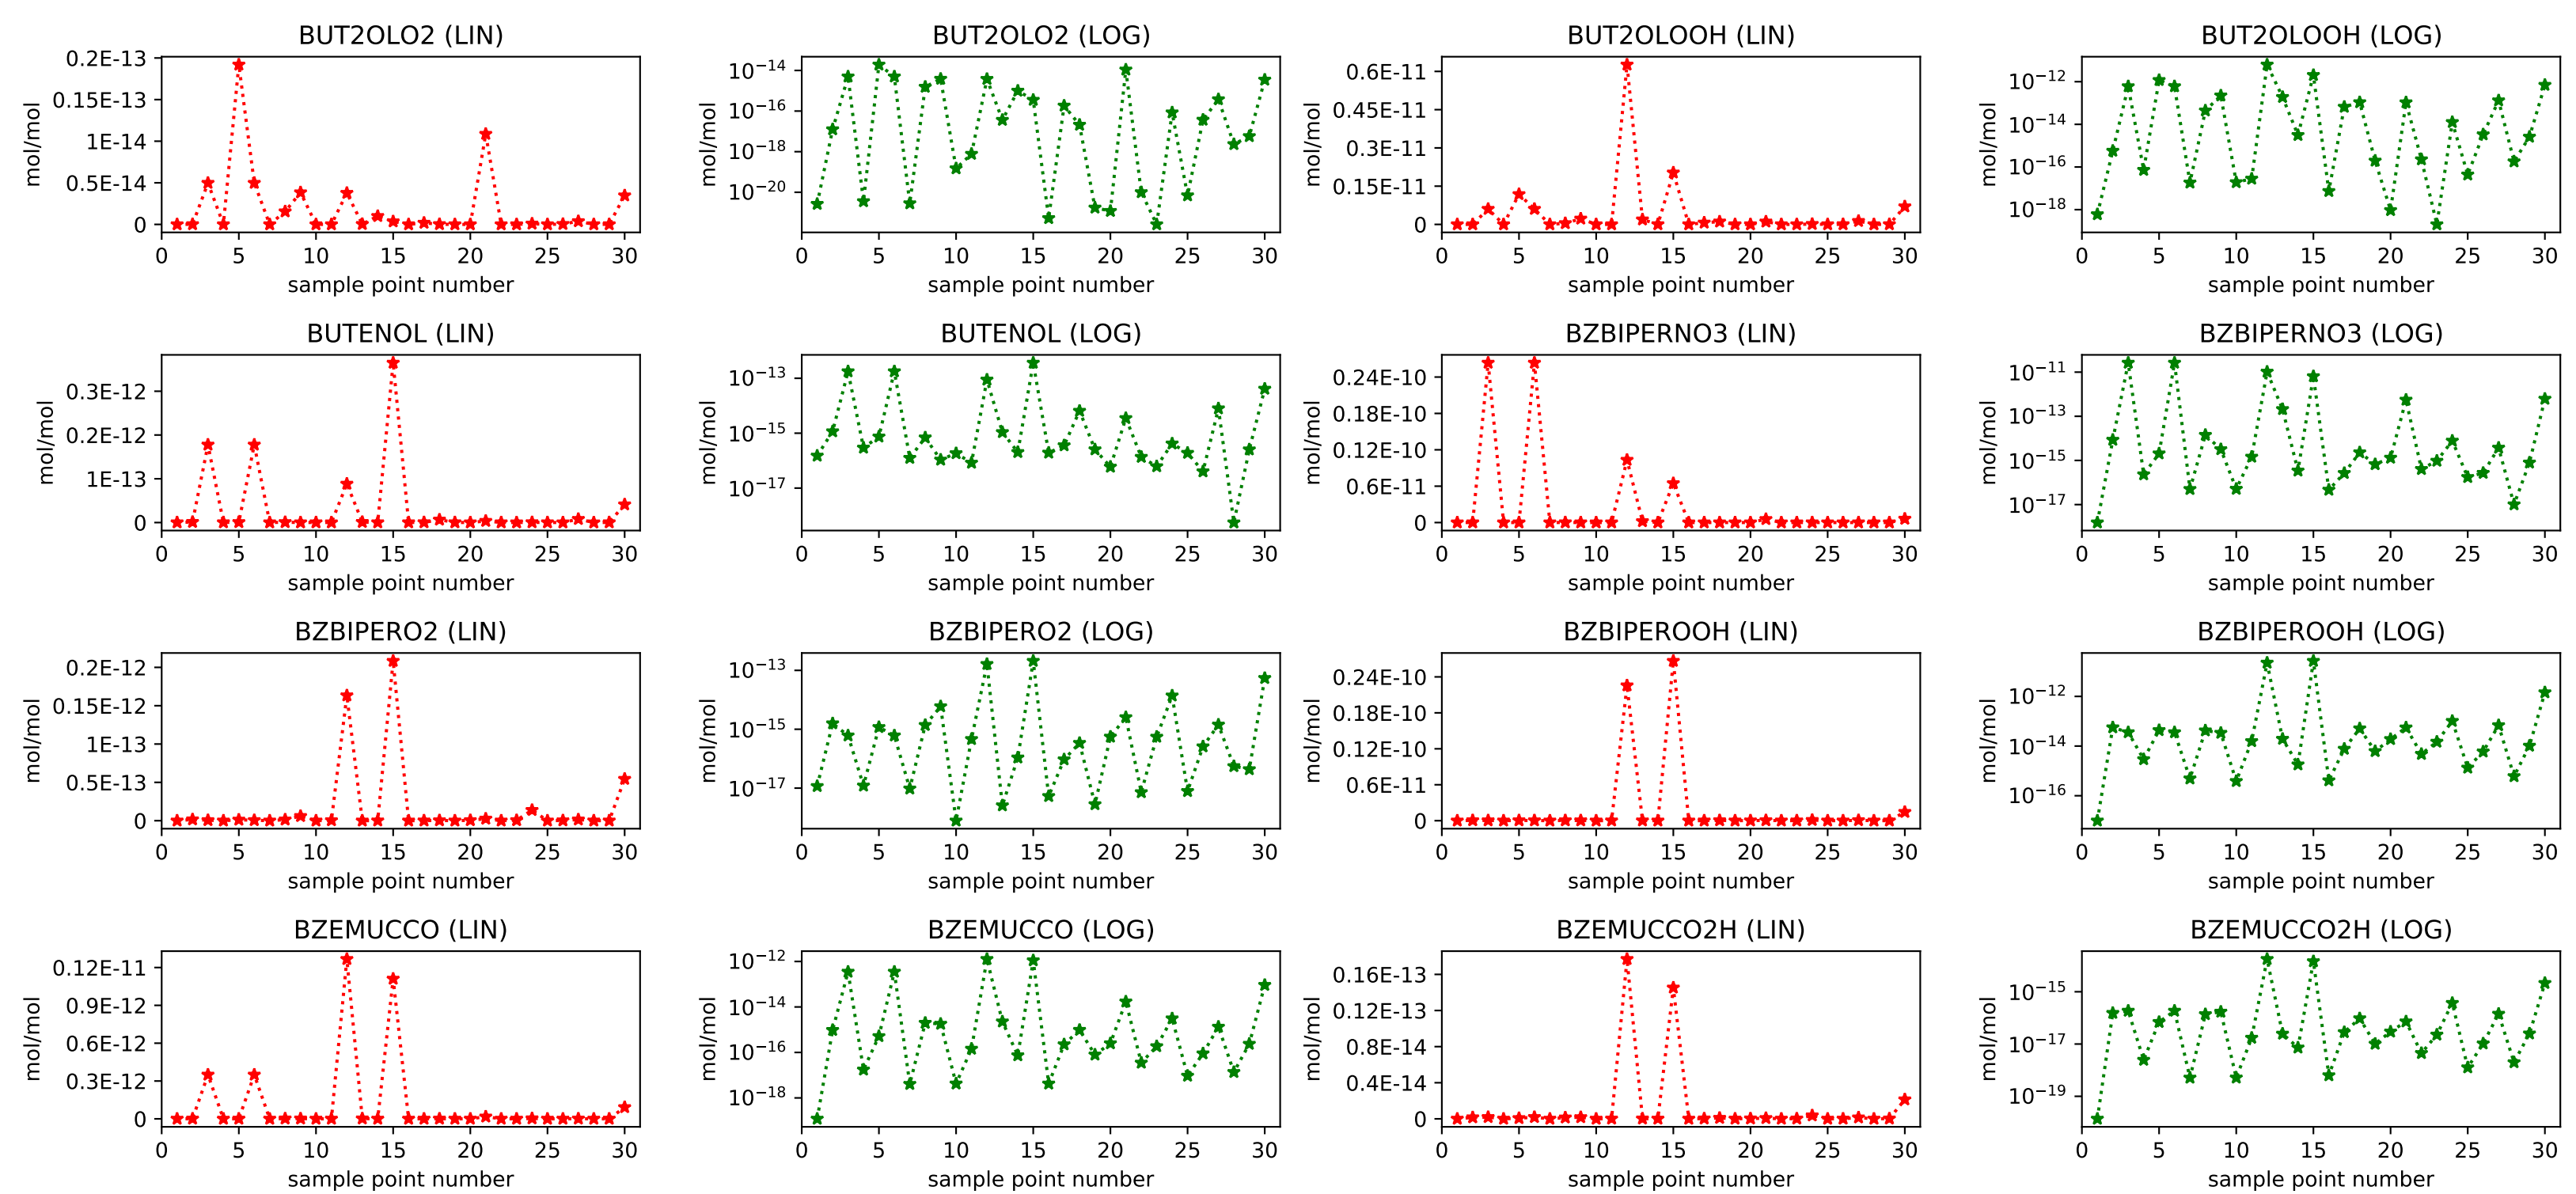

BZEMUCCO3 (LIN)

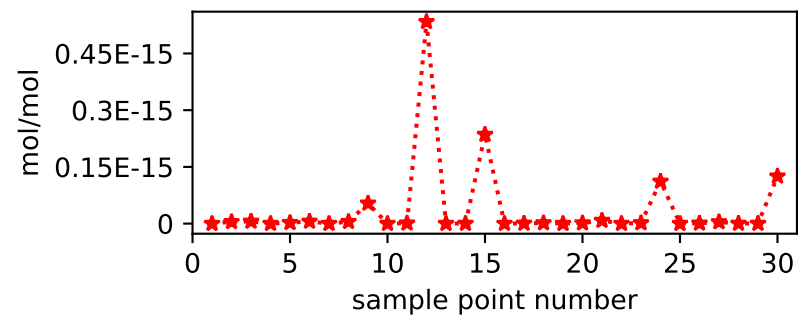

BZEMUCCO3 (LOG)

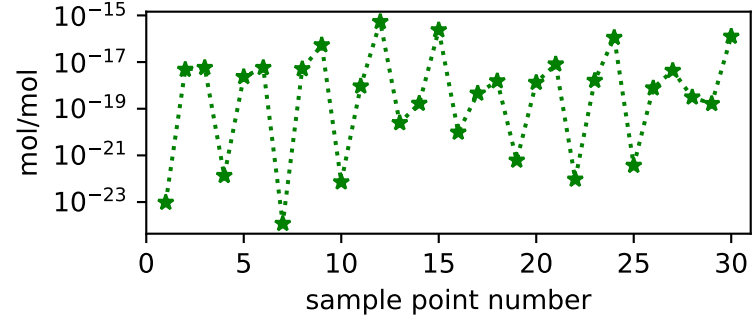

BZEMUCCO3H (LIN)

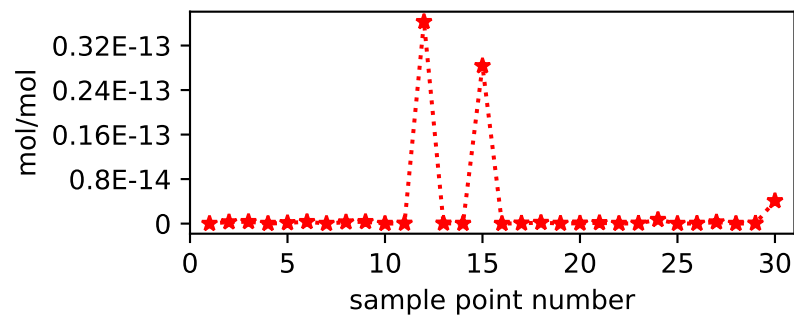

BZEMUCCO3H (LOG)

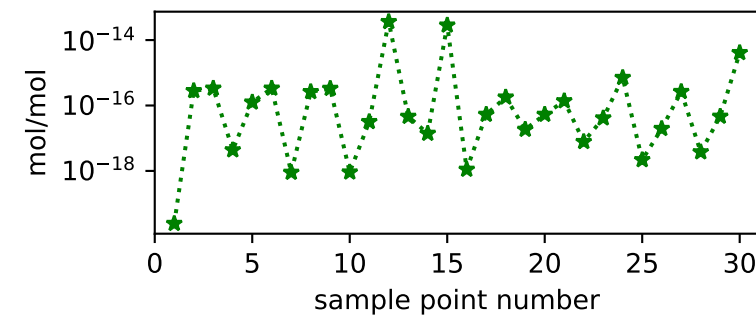

BZEMUCNO3 (LIN)

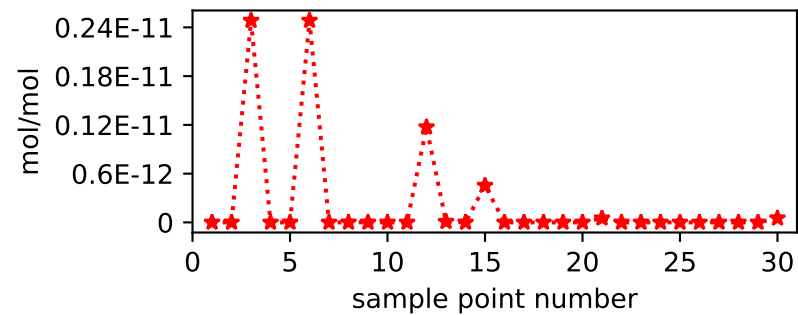

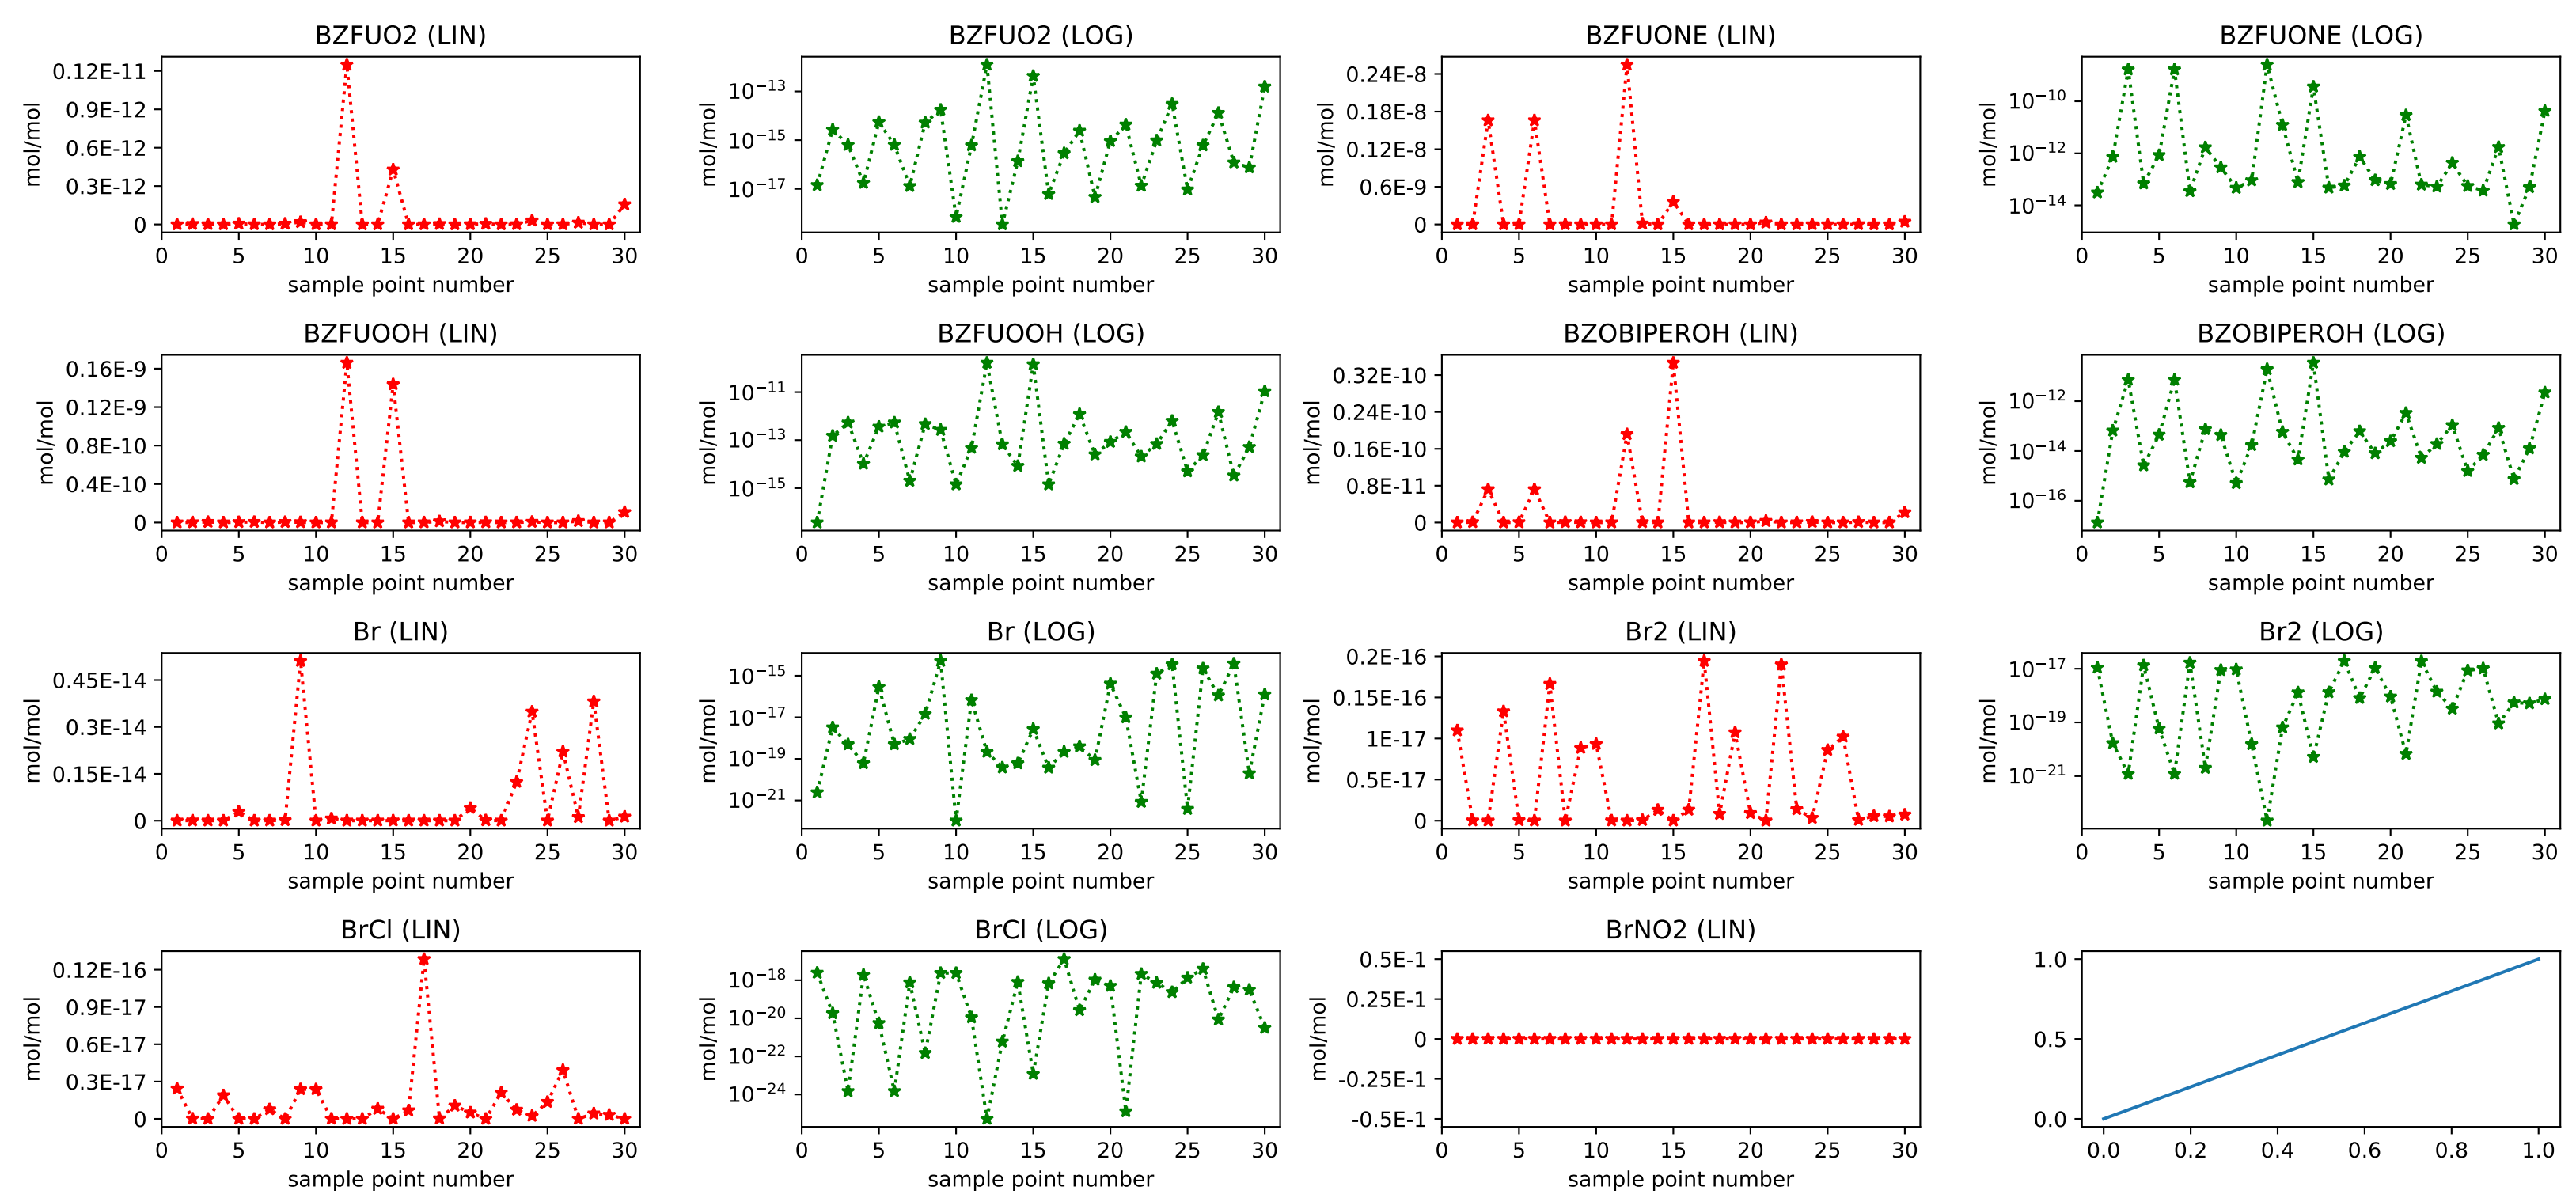

BrNO3 (LIN)

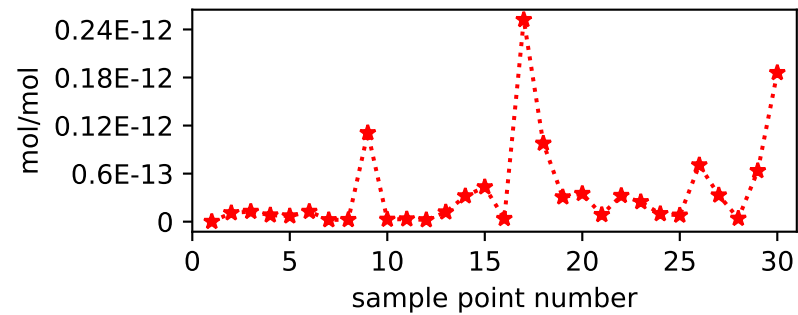

BrNO3 (LOG)

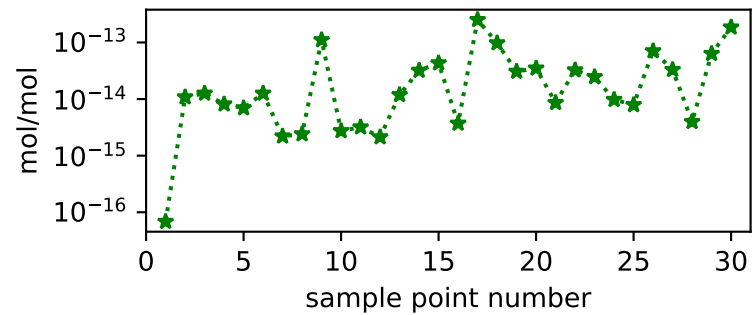

BrO (LIN)

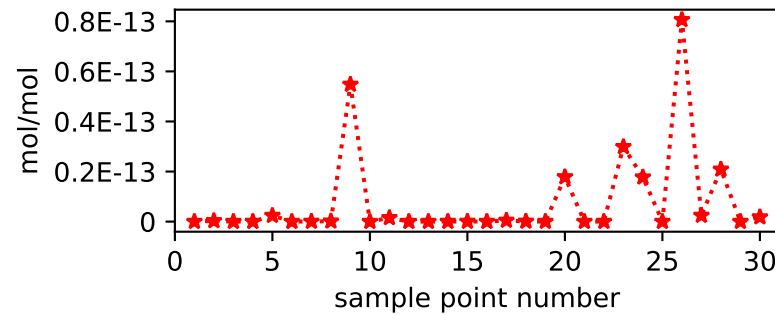

BrO (LOG)

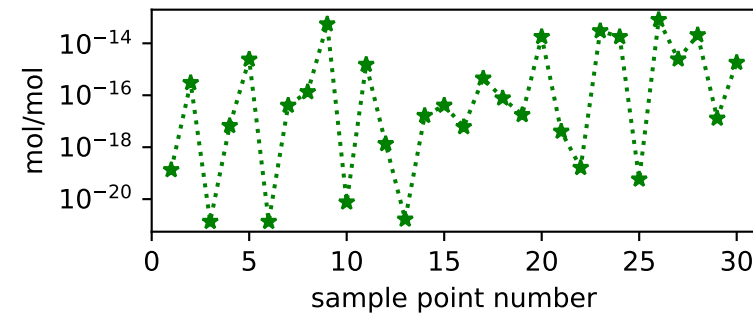

C106NO3 (LIN)

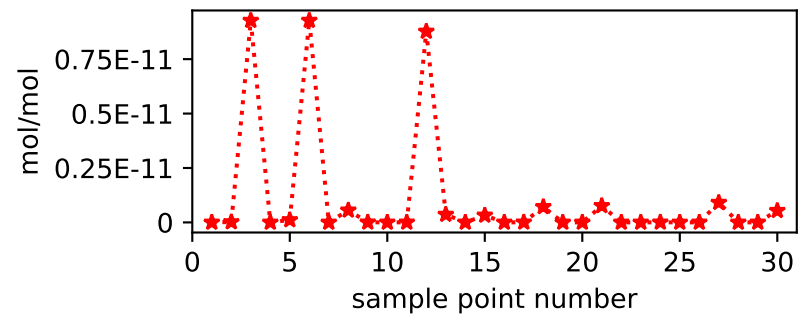

C10PAN2 (LIN)

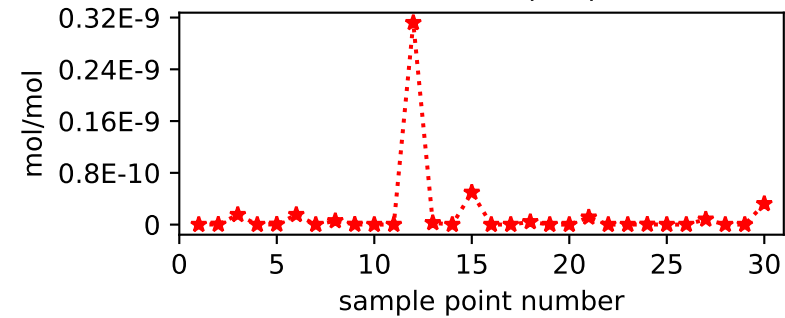

C10PAN2 (LOG)

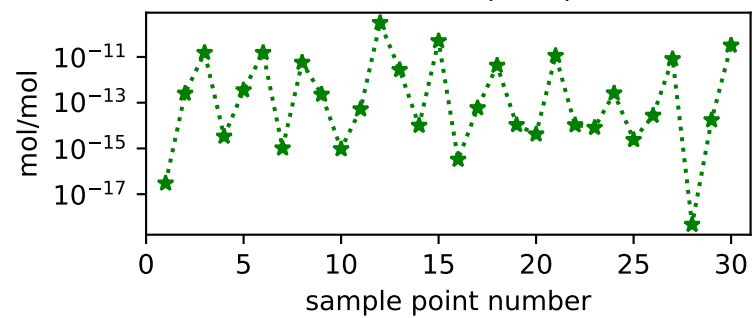

C10DC2O2C4OD (LIN)

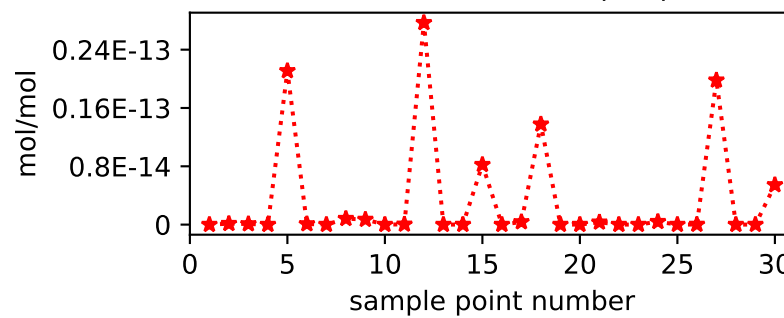

C10DC2O2C4OD (LOG)

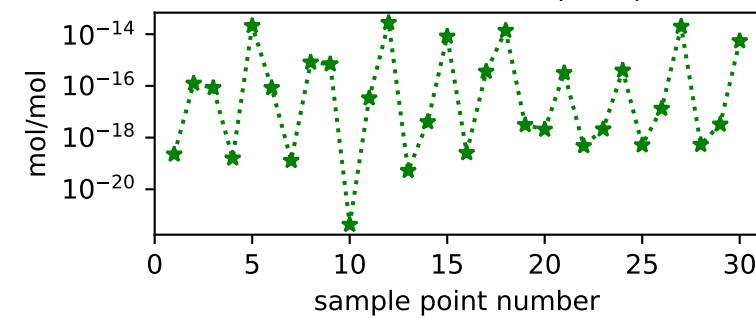

C235C6CO3H (LIN)

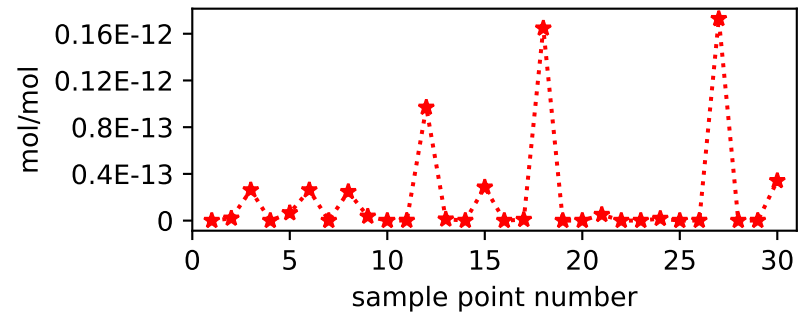

C235C6CO3H (LOG)

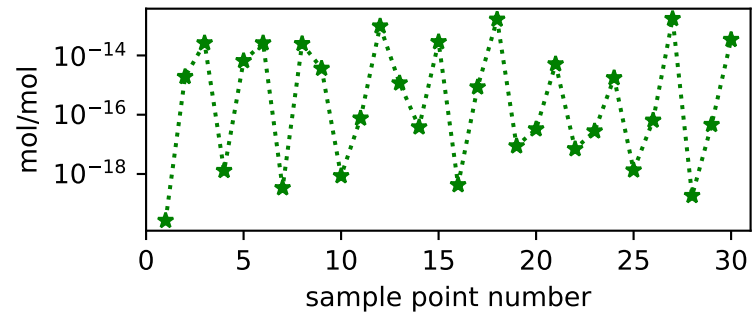

C2403CCO2H (LIN)

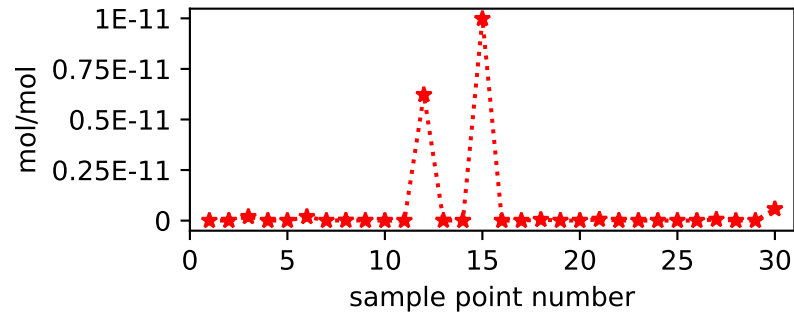

C2403CCO2H (LOG)

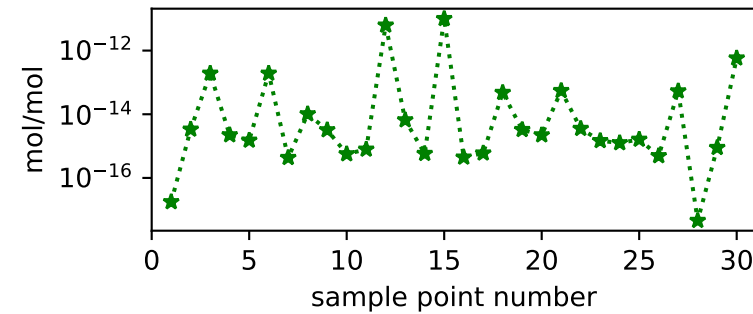

C2H2 (LIN)

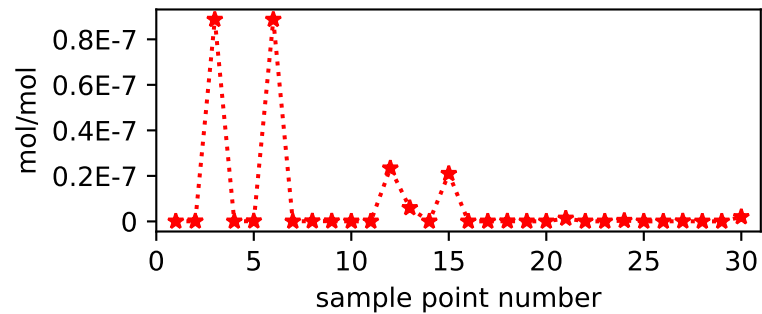

C2H5NO3 (LIN)

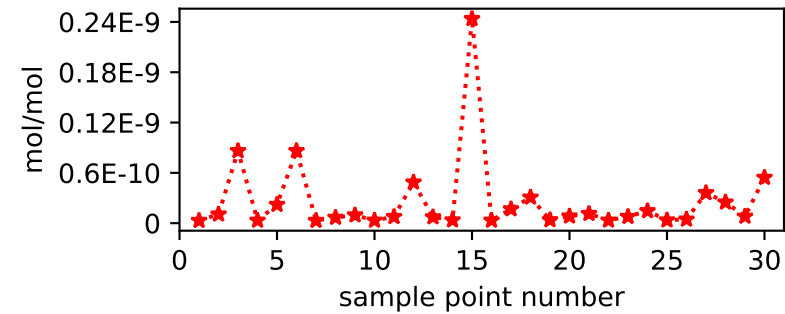

C2H5NO3 (LOG)

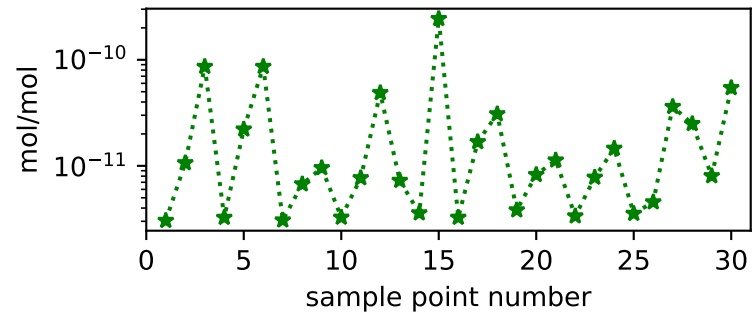

C2H5O2 (LIN)

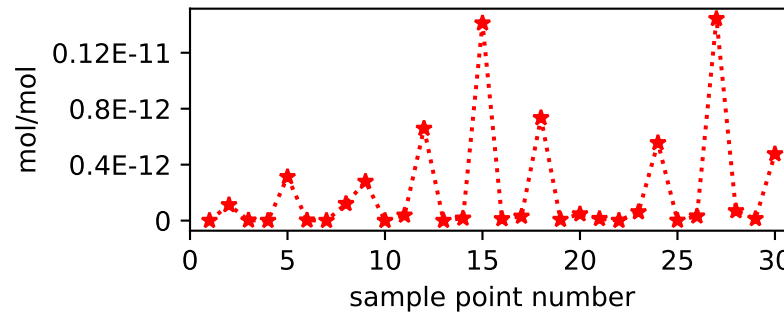

C2H5O2 (LOG)

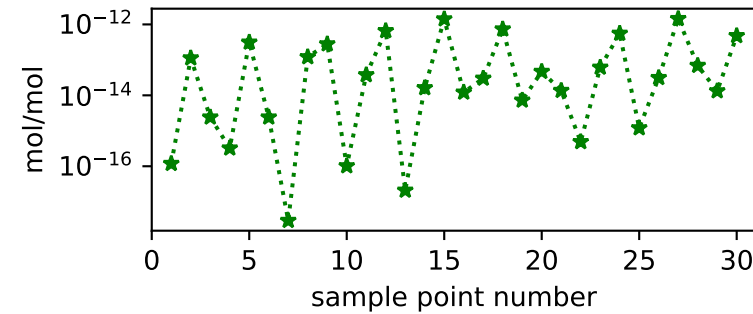

C312COPAN (LIN)

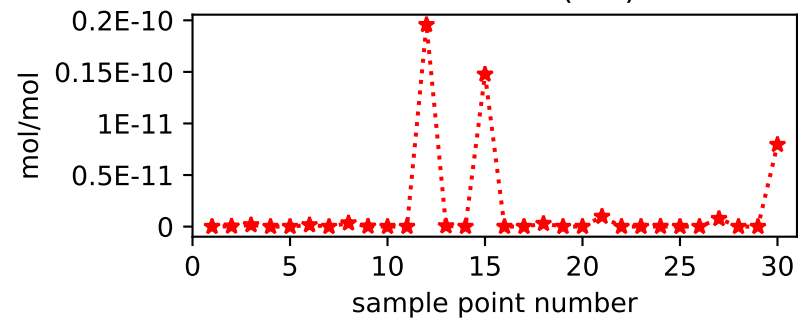

C312COPAN (LOG)

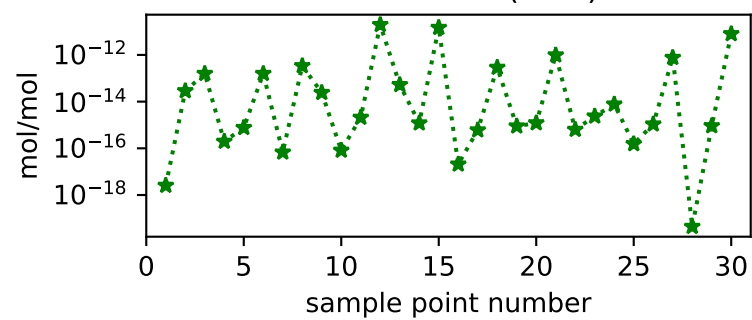

C32OH13CO (LIN)

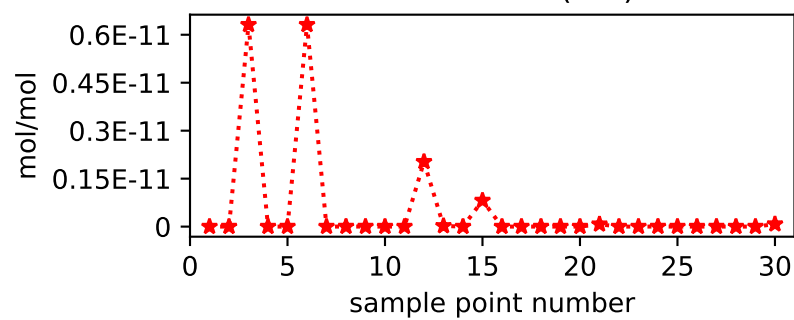

C32OH13CO (LOG)

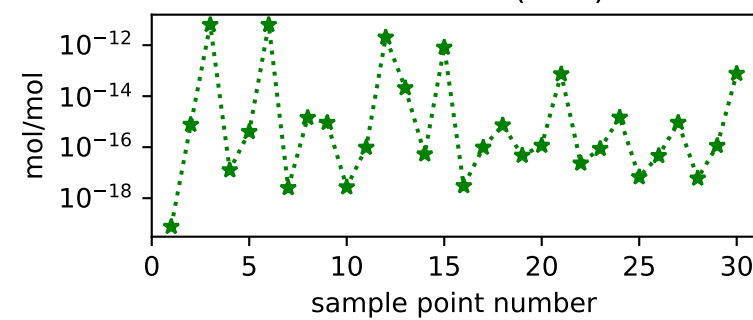

C33CO (LIN)

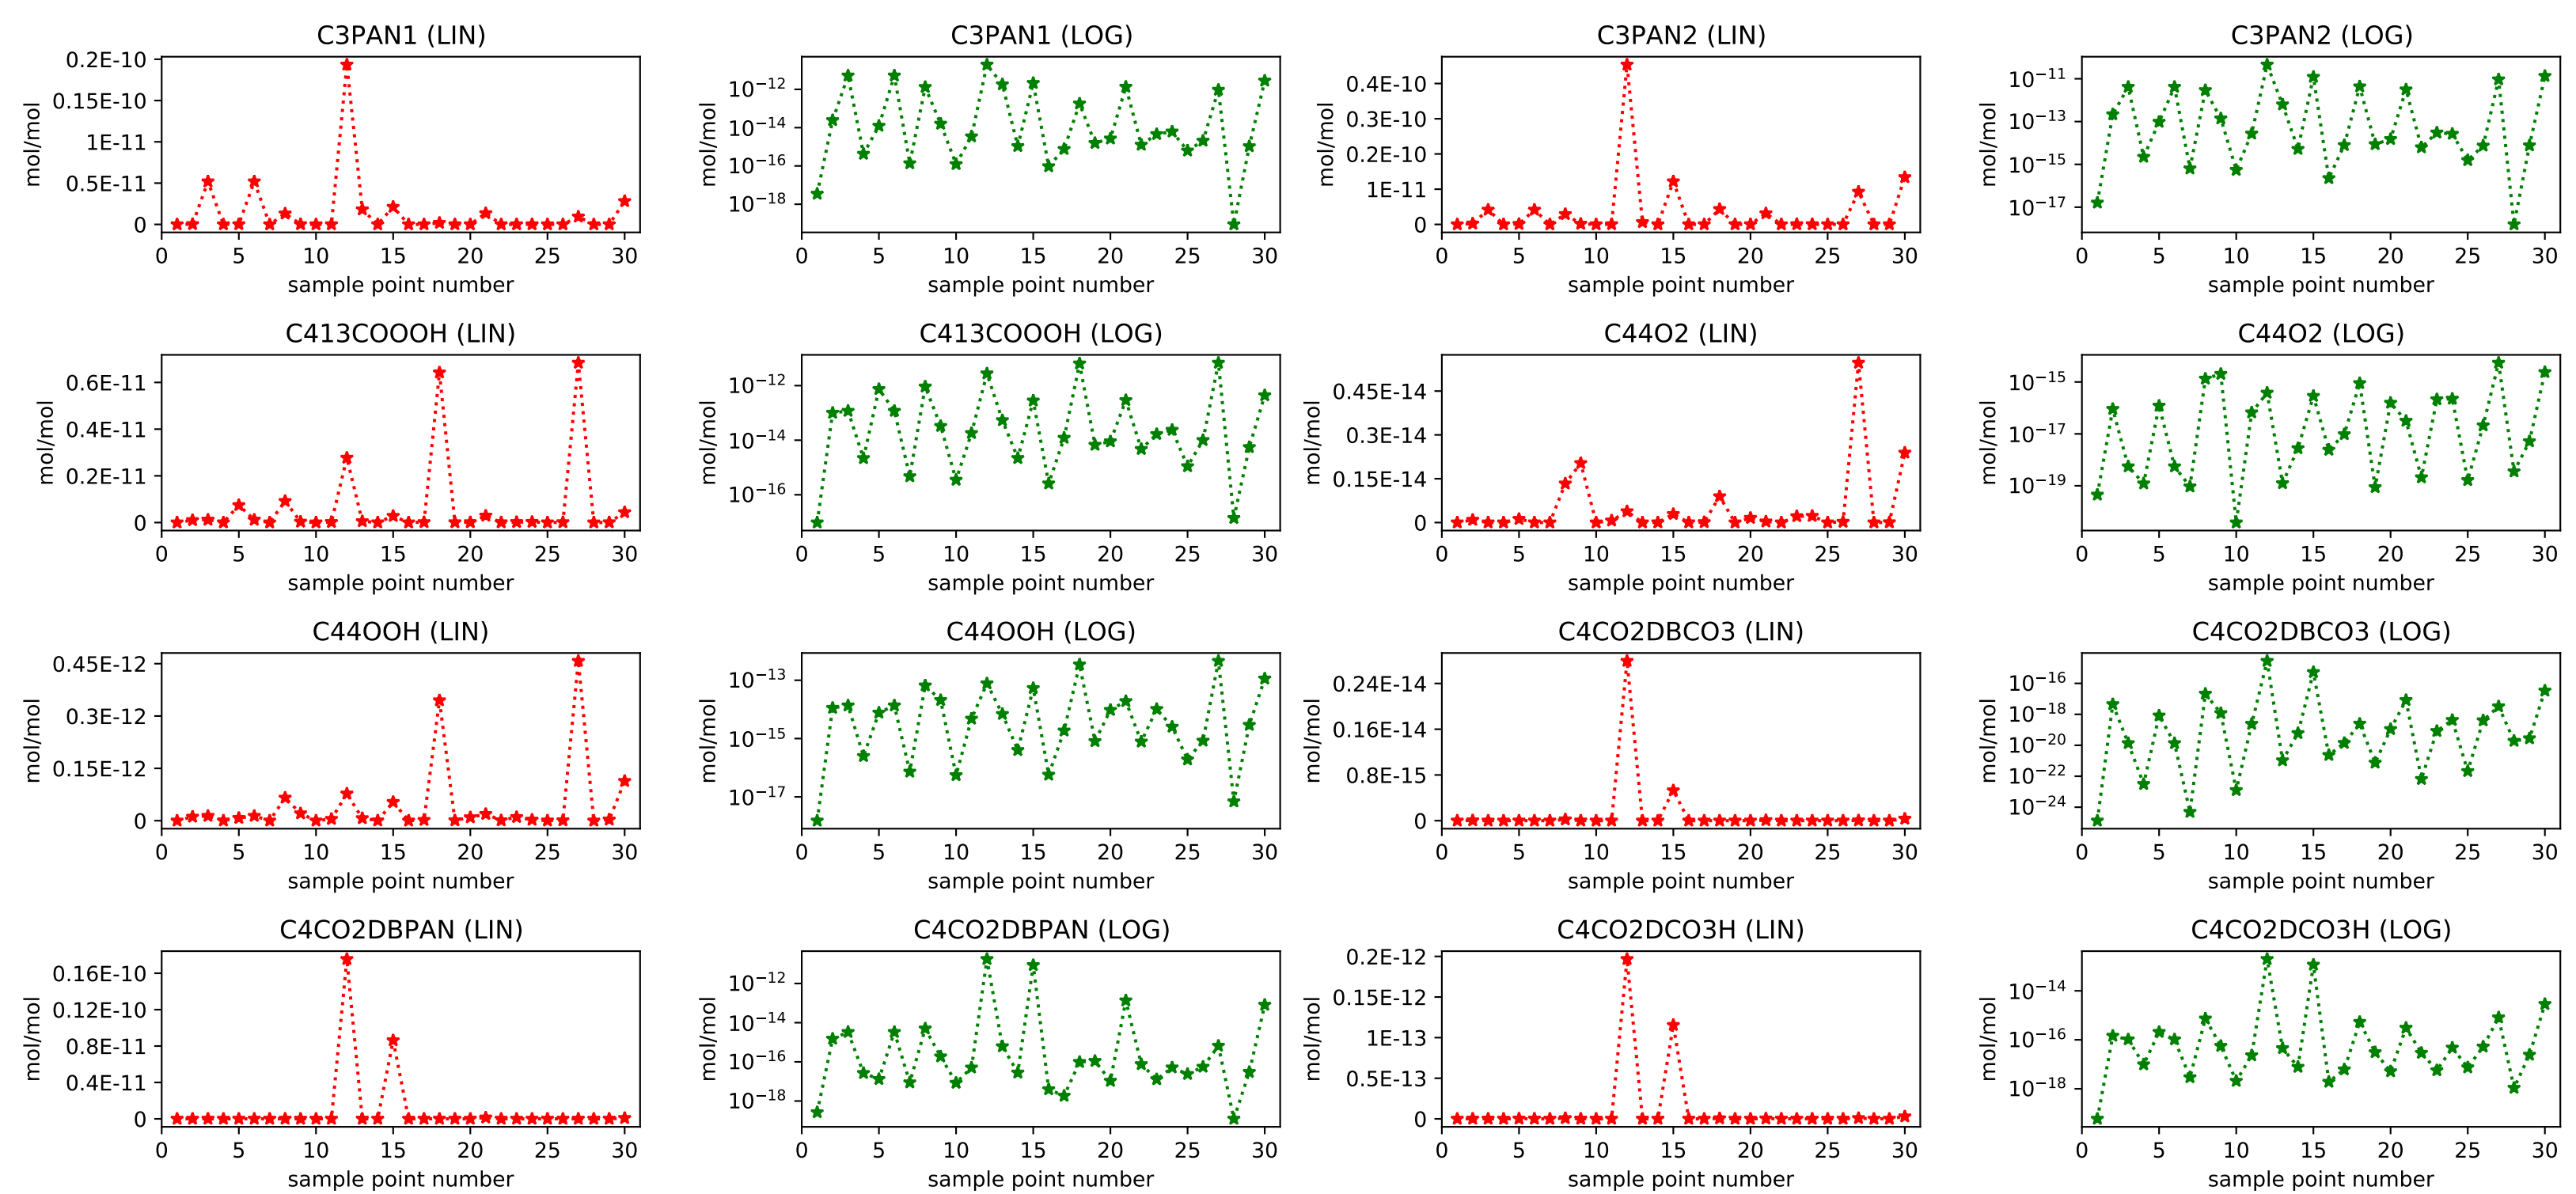

C4CODIAL (LIN)

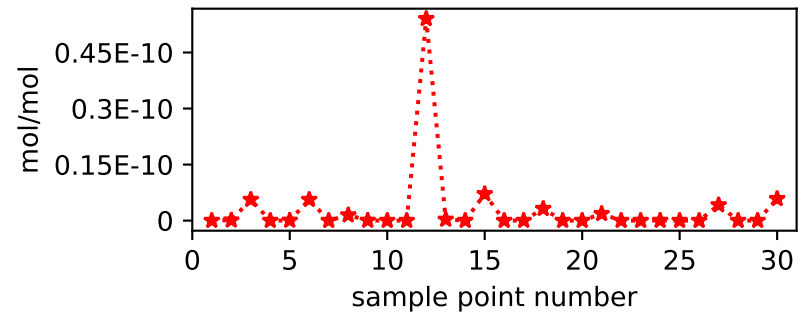

C4CODIAL (LOG)

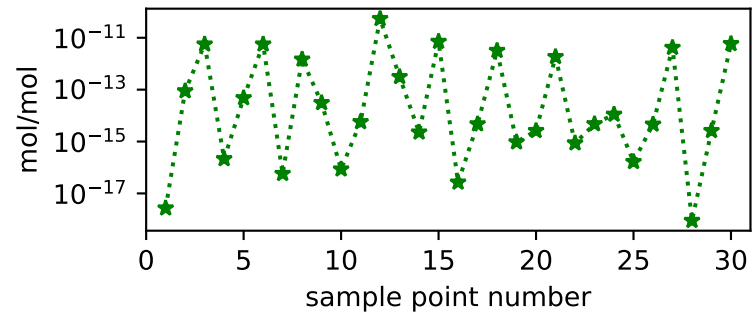

C4MCONO3OH (LIN)

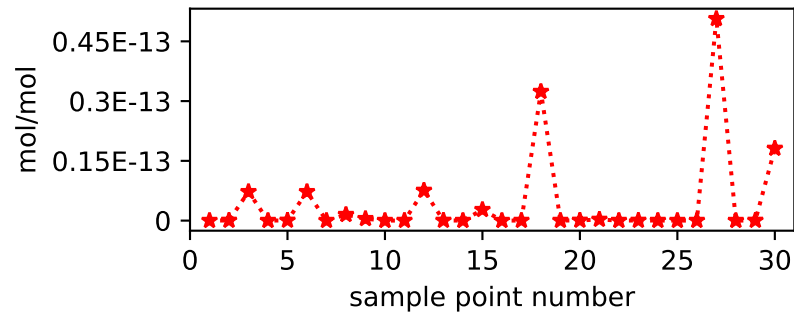

C4MCONO3OH (LOG)

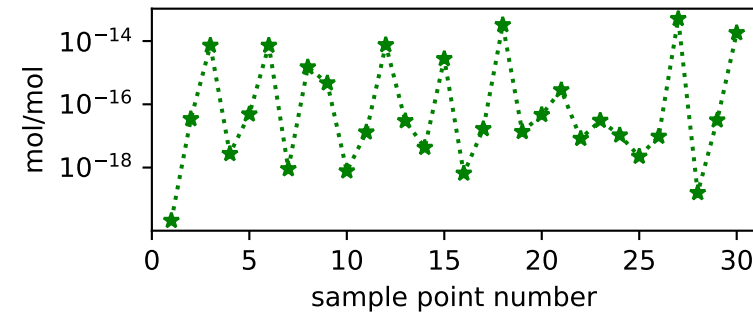

C4PAN5 (LIN)

C513CO (LIN)

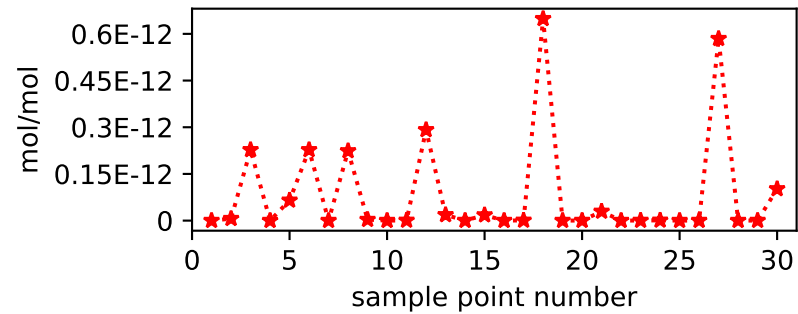

C513CO (LOG)

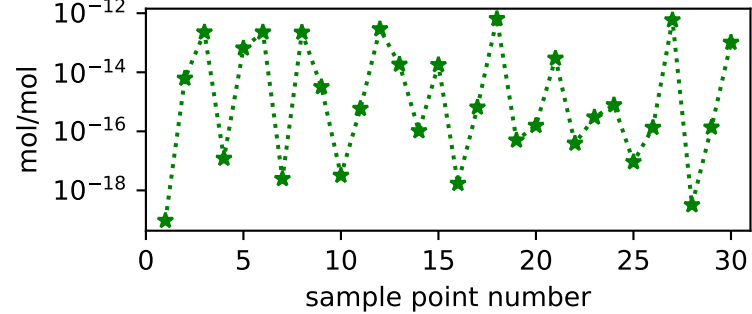

C513O2 (LIN)

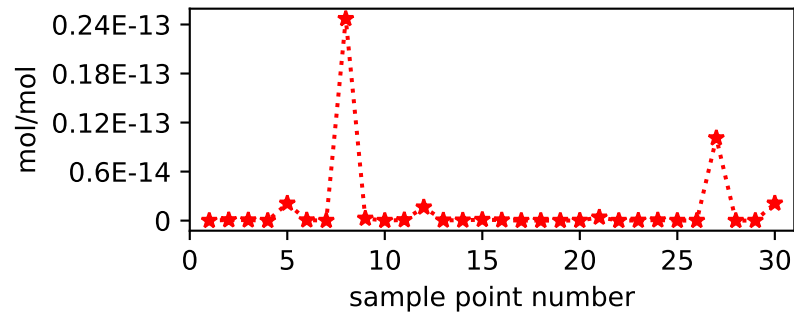

C513O2 (LOG)

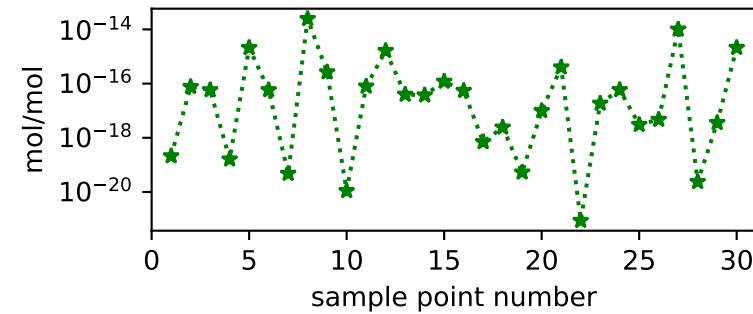

C513OOH (LIN)

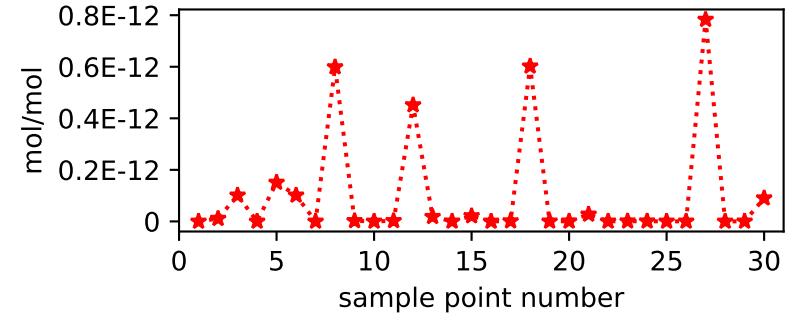

C59OOH (LIN)

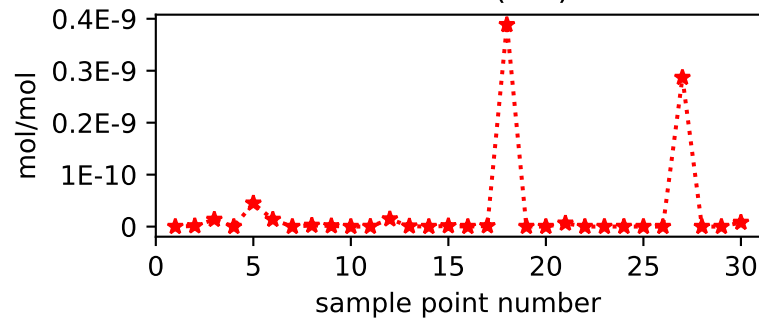

C59OOH (LOG)

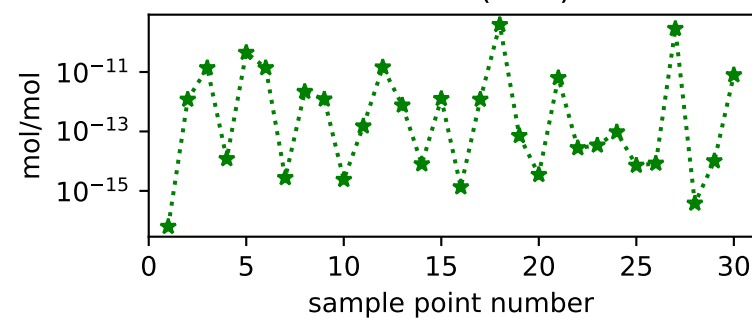

C5CO14O2 (LIN)

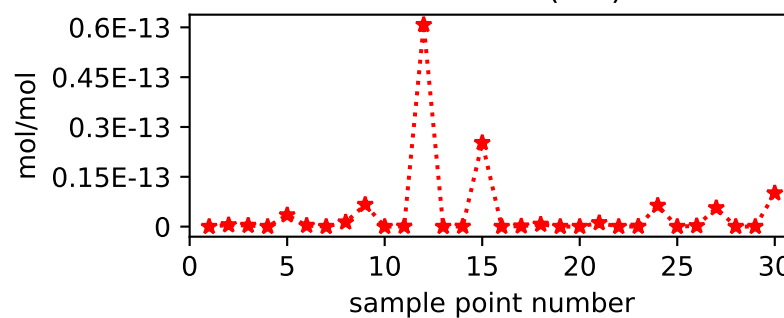

C5CO14O2 (LOG)

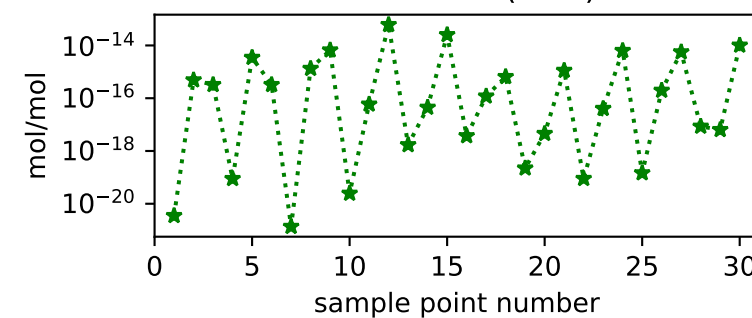

C5CO14OH (LIN)

C5CO2OHPAN (LIN)

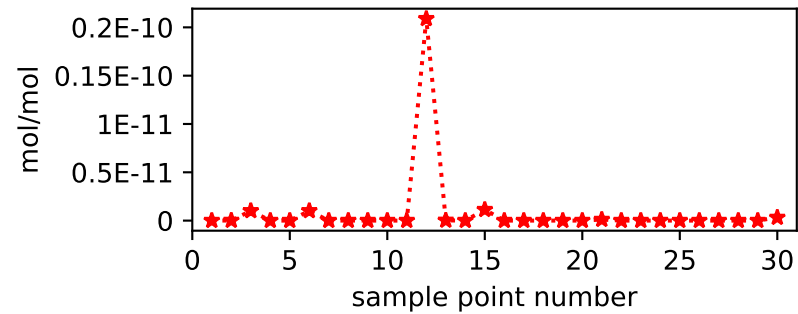

C5CO2OHPAN (LOG)

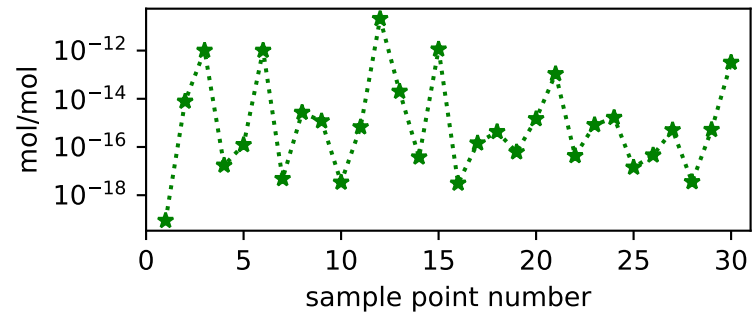

C5COO2NO2 (LIN)

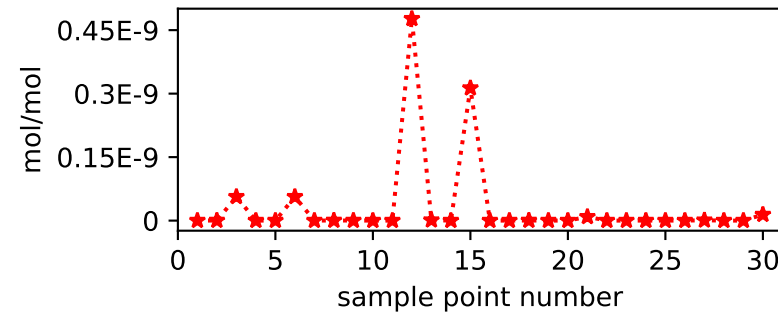

C5COO2NO2 (LOG)

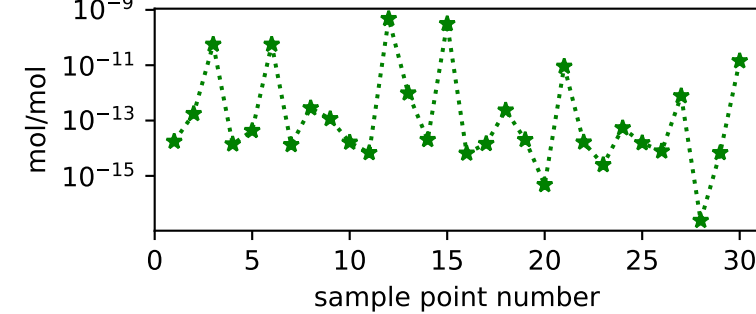

C5COOHCO3H (LIN)

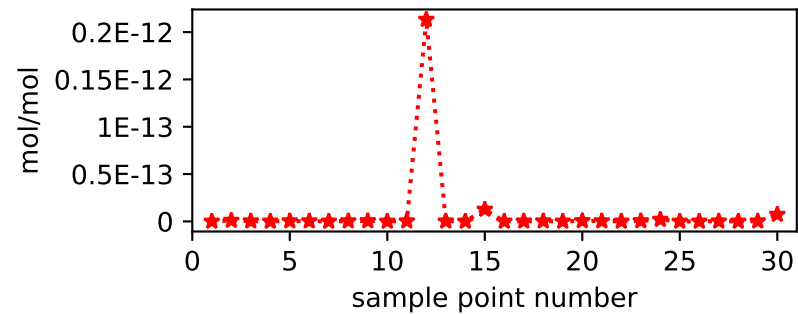

C5DICAROOH (LIN)

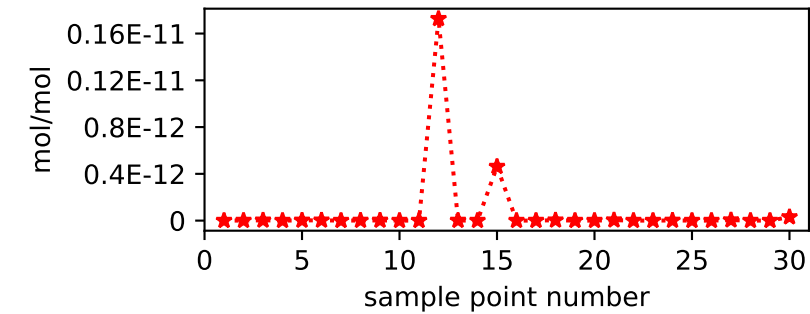

C5DICAROOH (LOG)

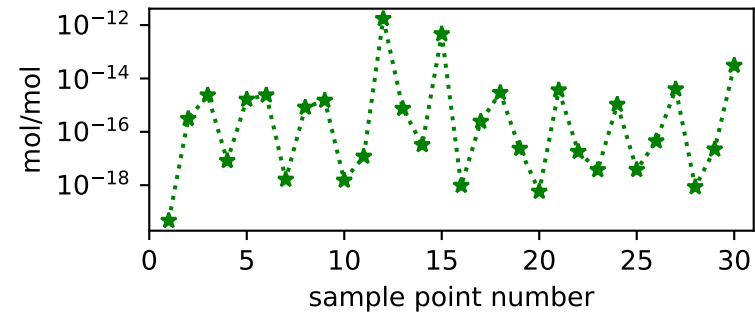

C5H8 (LIN)

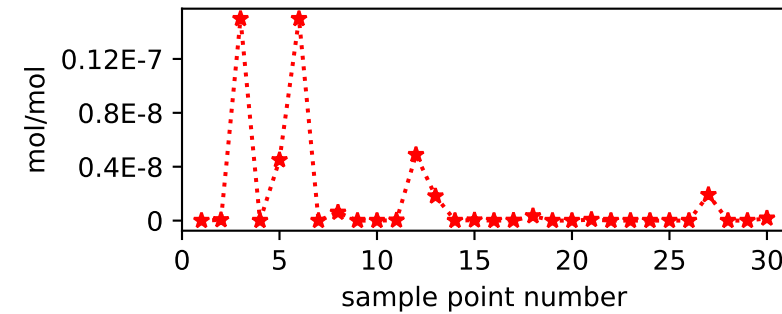

C5H8 (LOG)

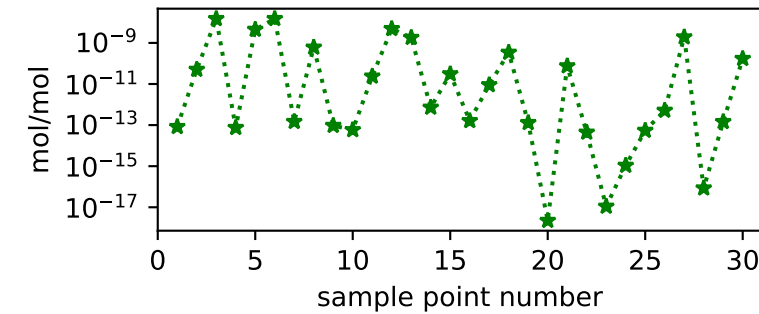

C615CO2O2 (LIN)

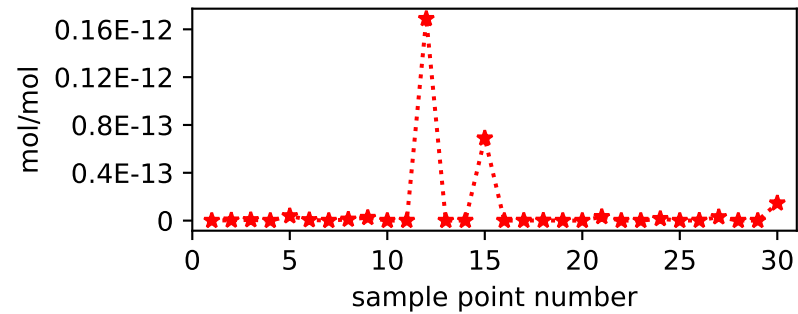

C615CO2O2 (LOG)

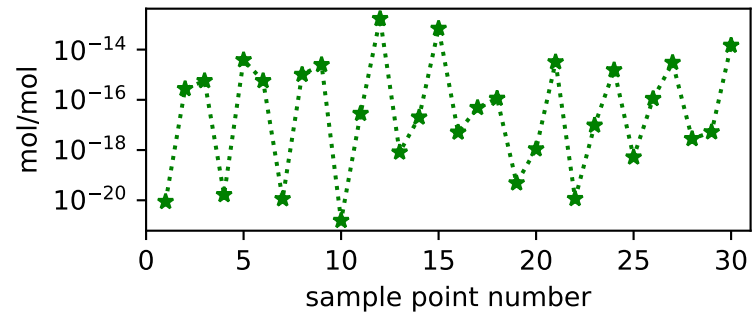

C615CO2OOH (LIN)

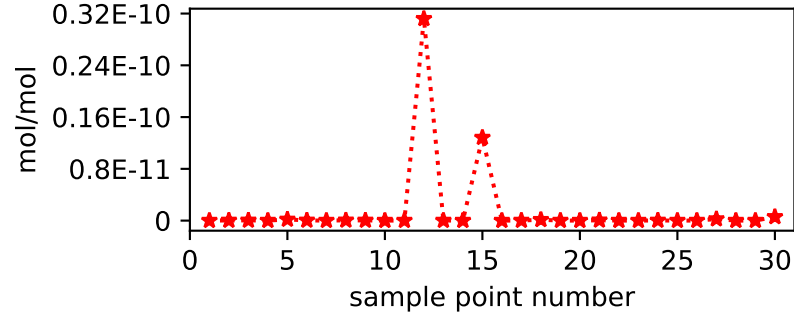

C615CO2OOH (LOG)

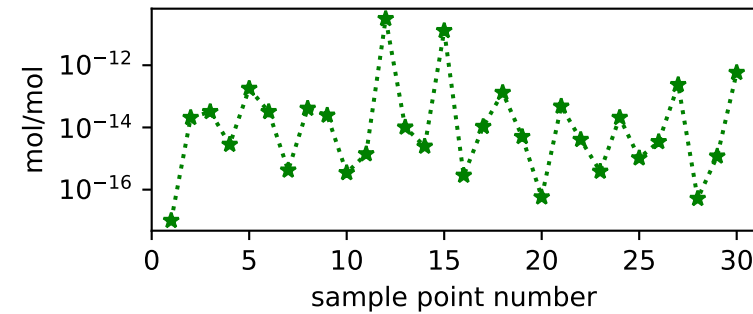

C6CO2OHCO3 (LIN)

C6H5CH2OOH (LIN)

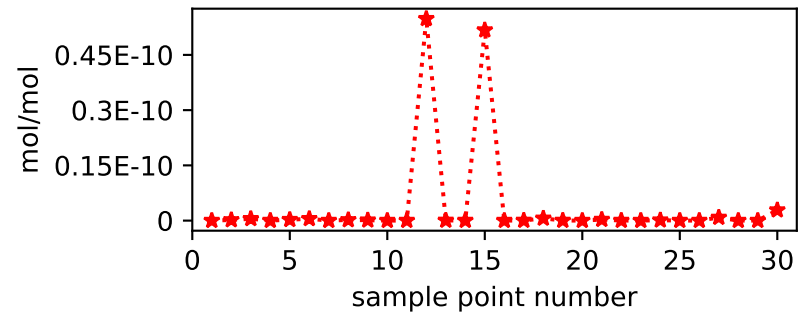

C6H5CH2OOH (LOG)

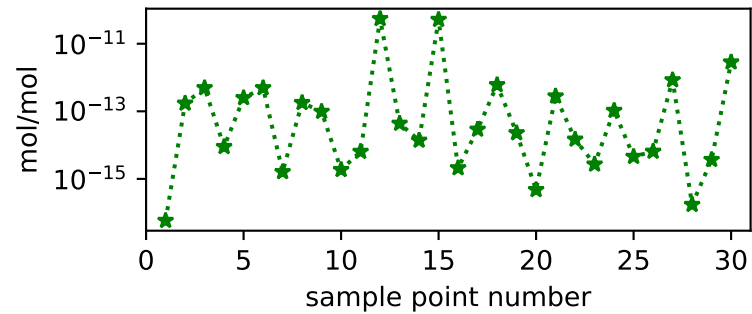

C6H5CO3 (LIN)

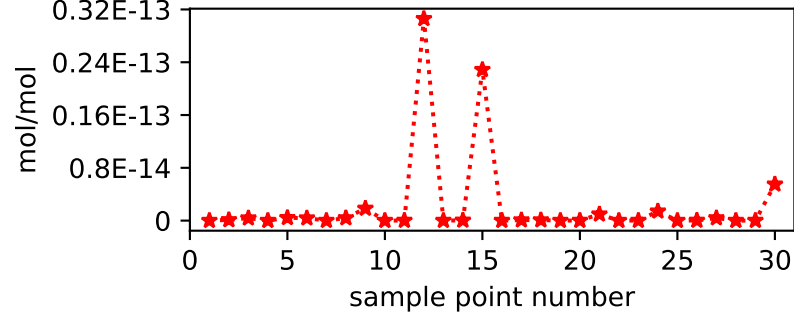

C6H5CO3 (LOG)

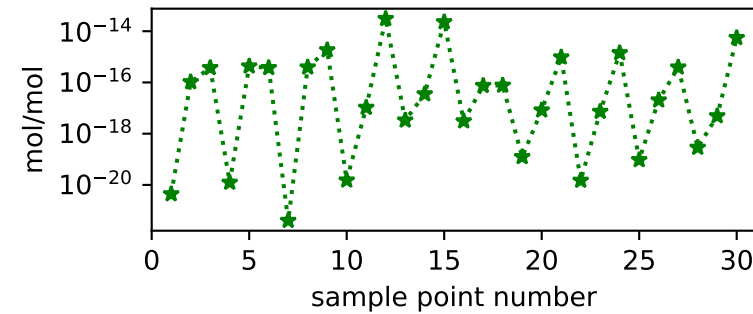

C721CHO (LIN)

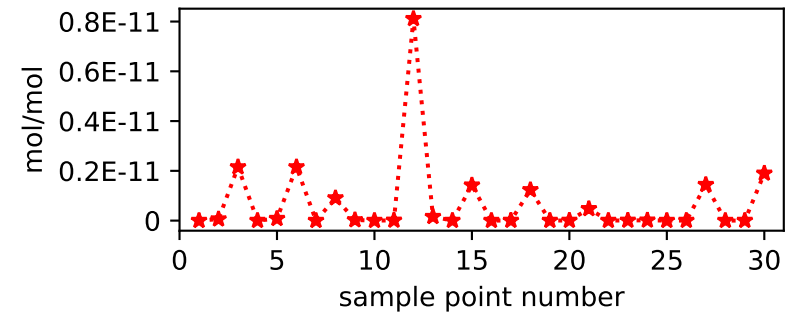

C721CHO (LOG)

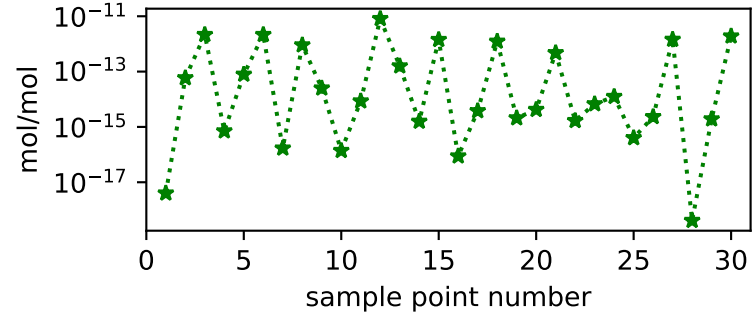

C721CO3 (LIN)

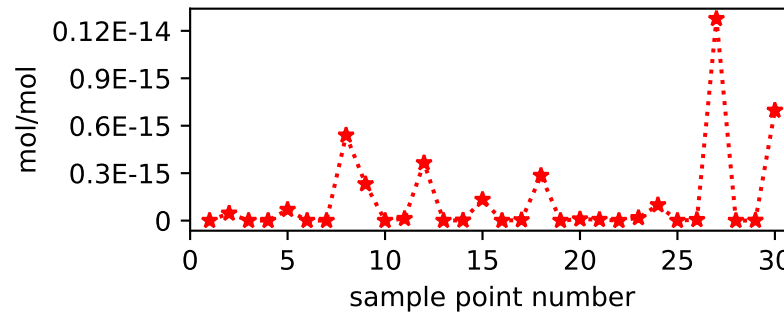

C721CO3 (LOG)

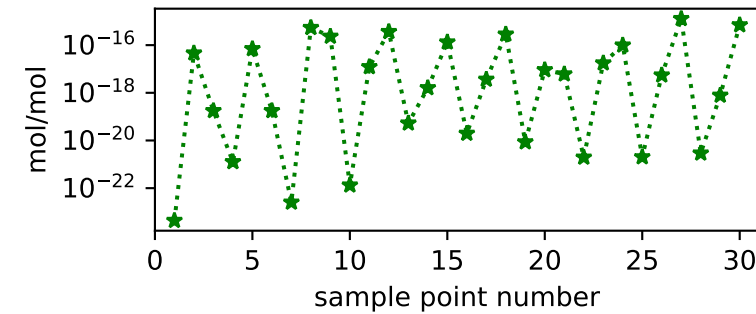

C721CO3H (LIN)

C7CO4DB (LIN)

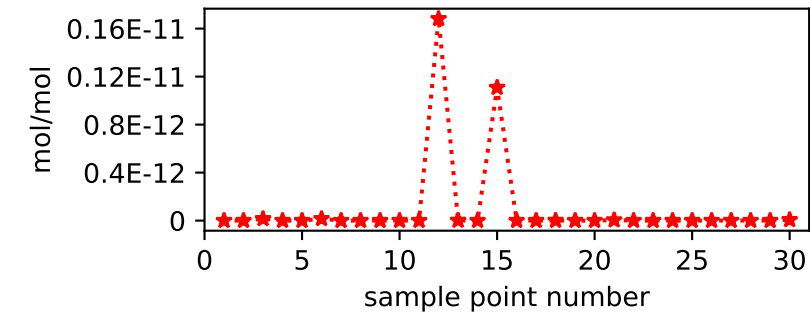

C7CO4DB (LOG)

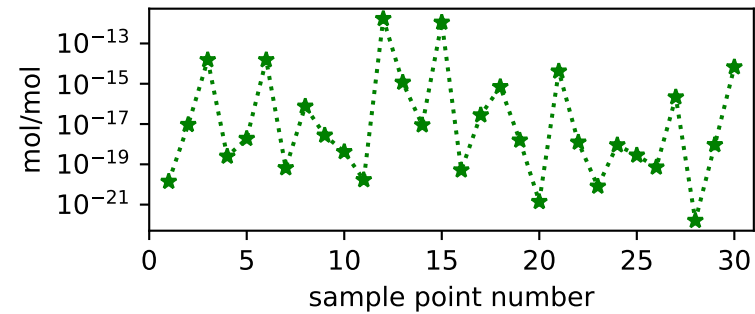

C7PAN3 (LIN)

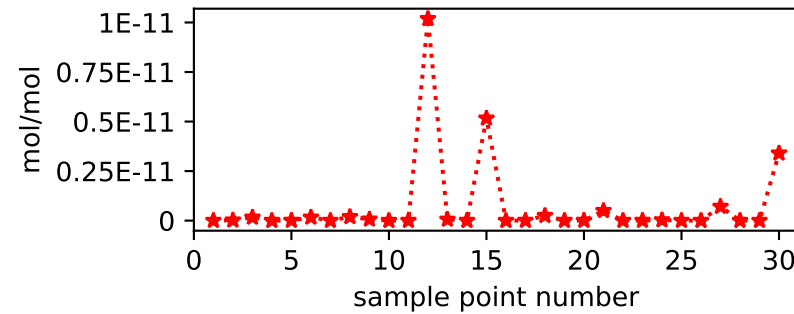

C7PAN3 (LOG)

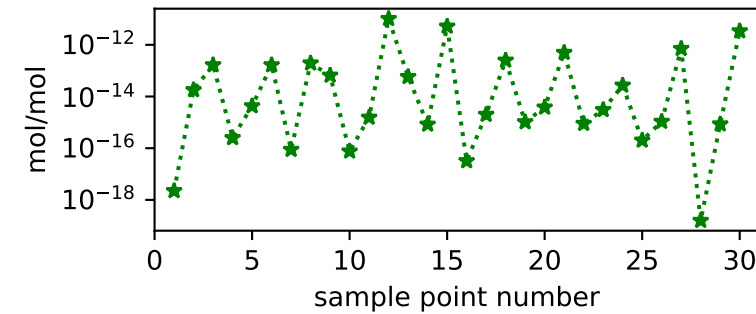

C8

C811PAN (LIN)

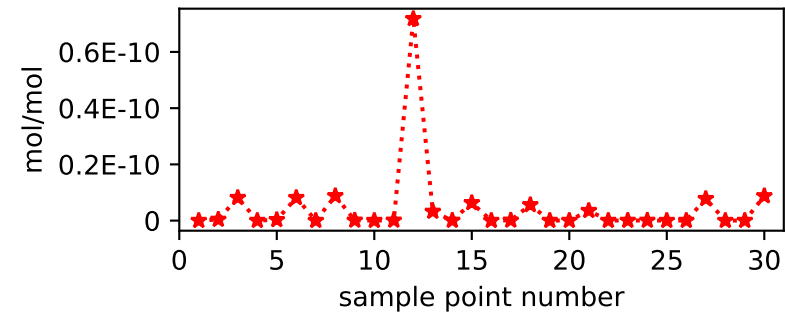

C811PAN (LOG)

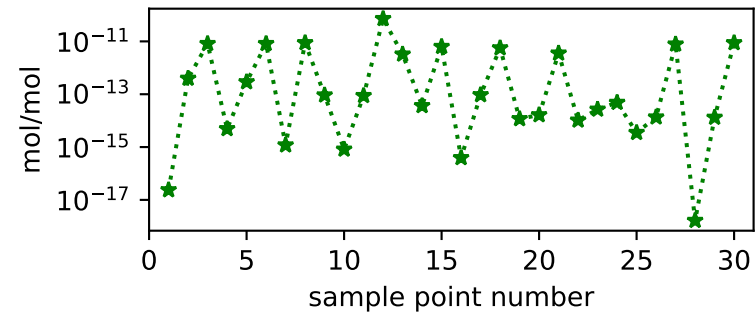

C812O2 (LIN)

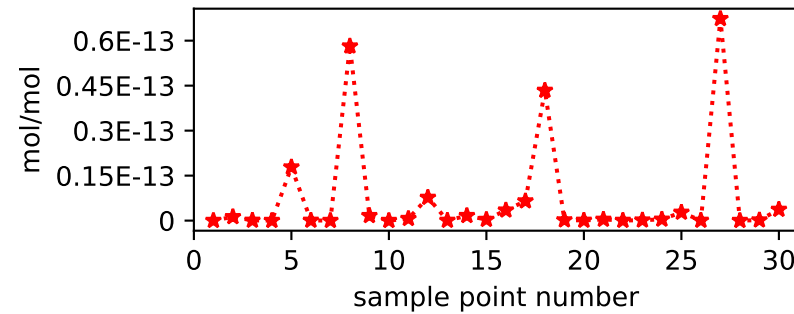

C812O2 (LOG)

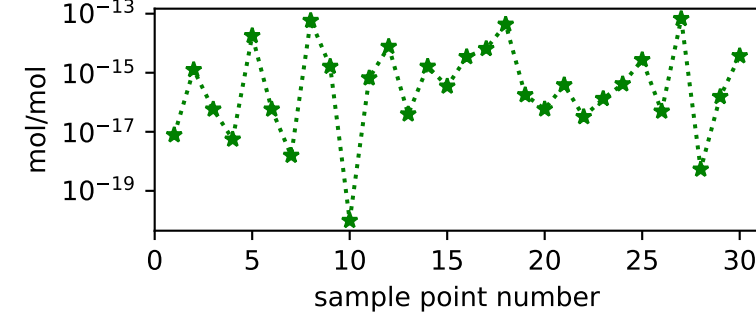

C812

C85OOH (LIN)

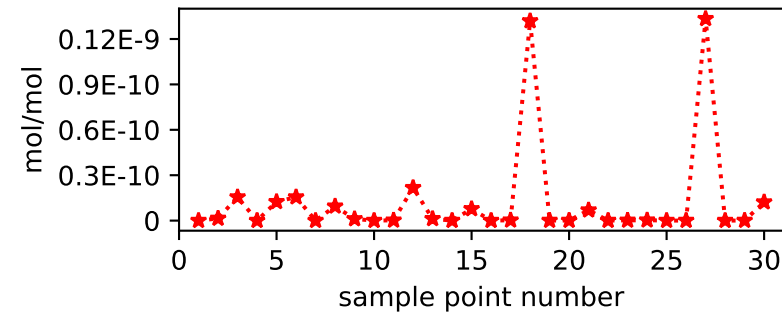

C85OOH (LOG)

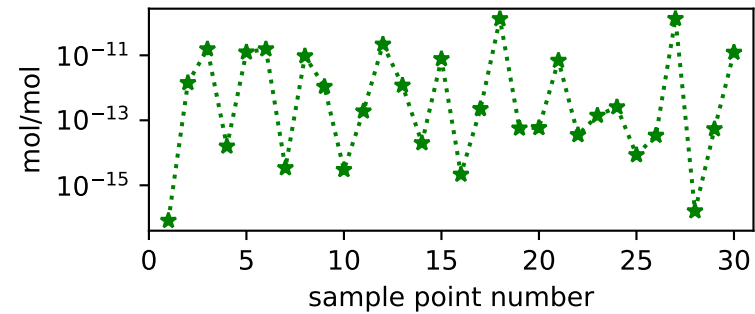

C86O2 (LIN)

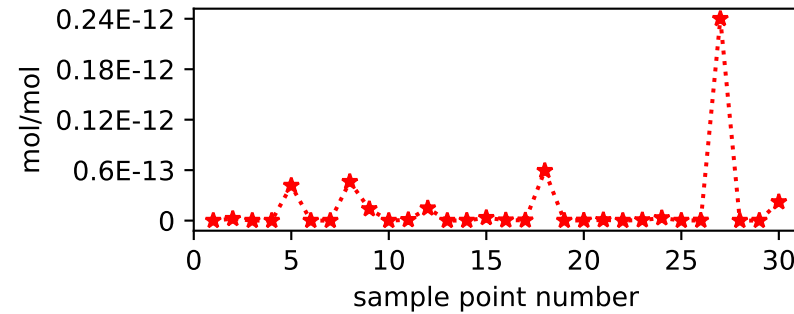

C86O2 (LOG)

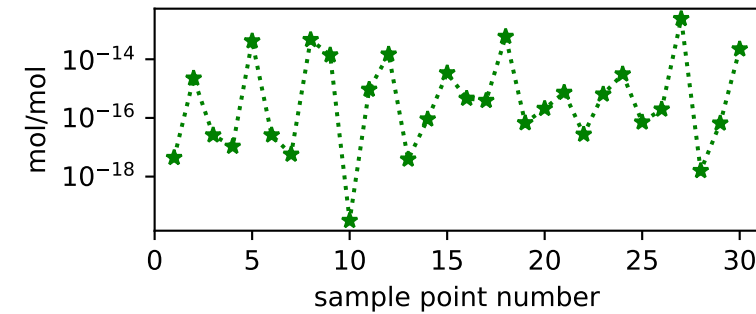

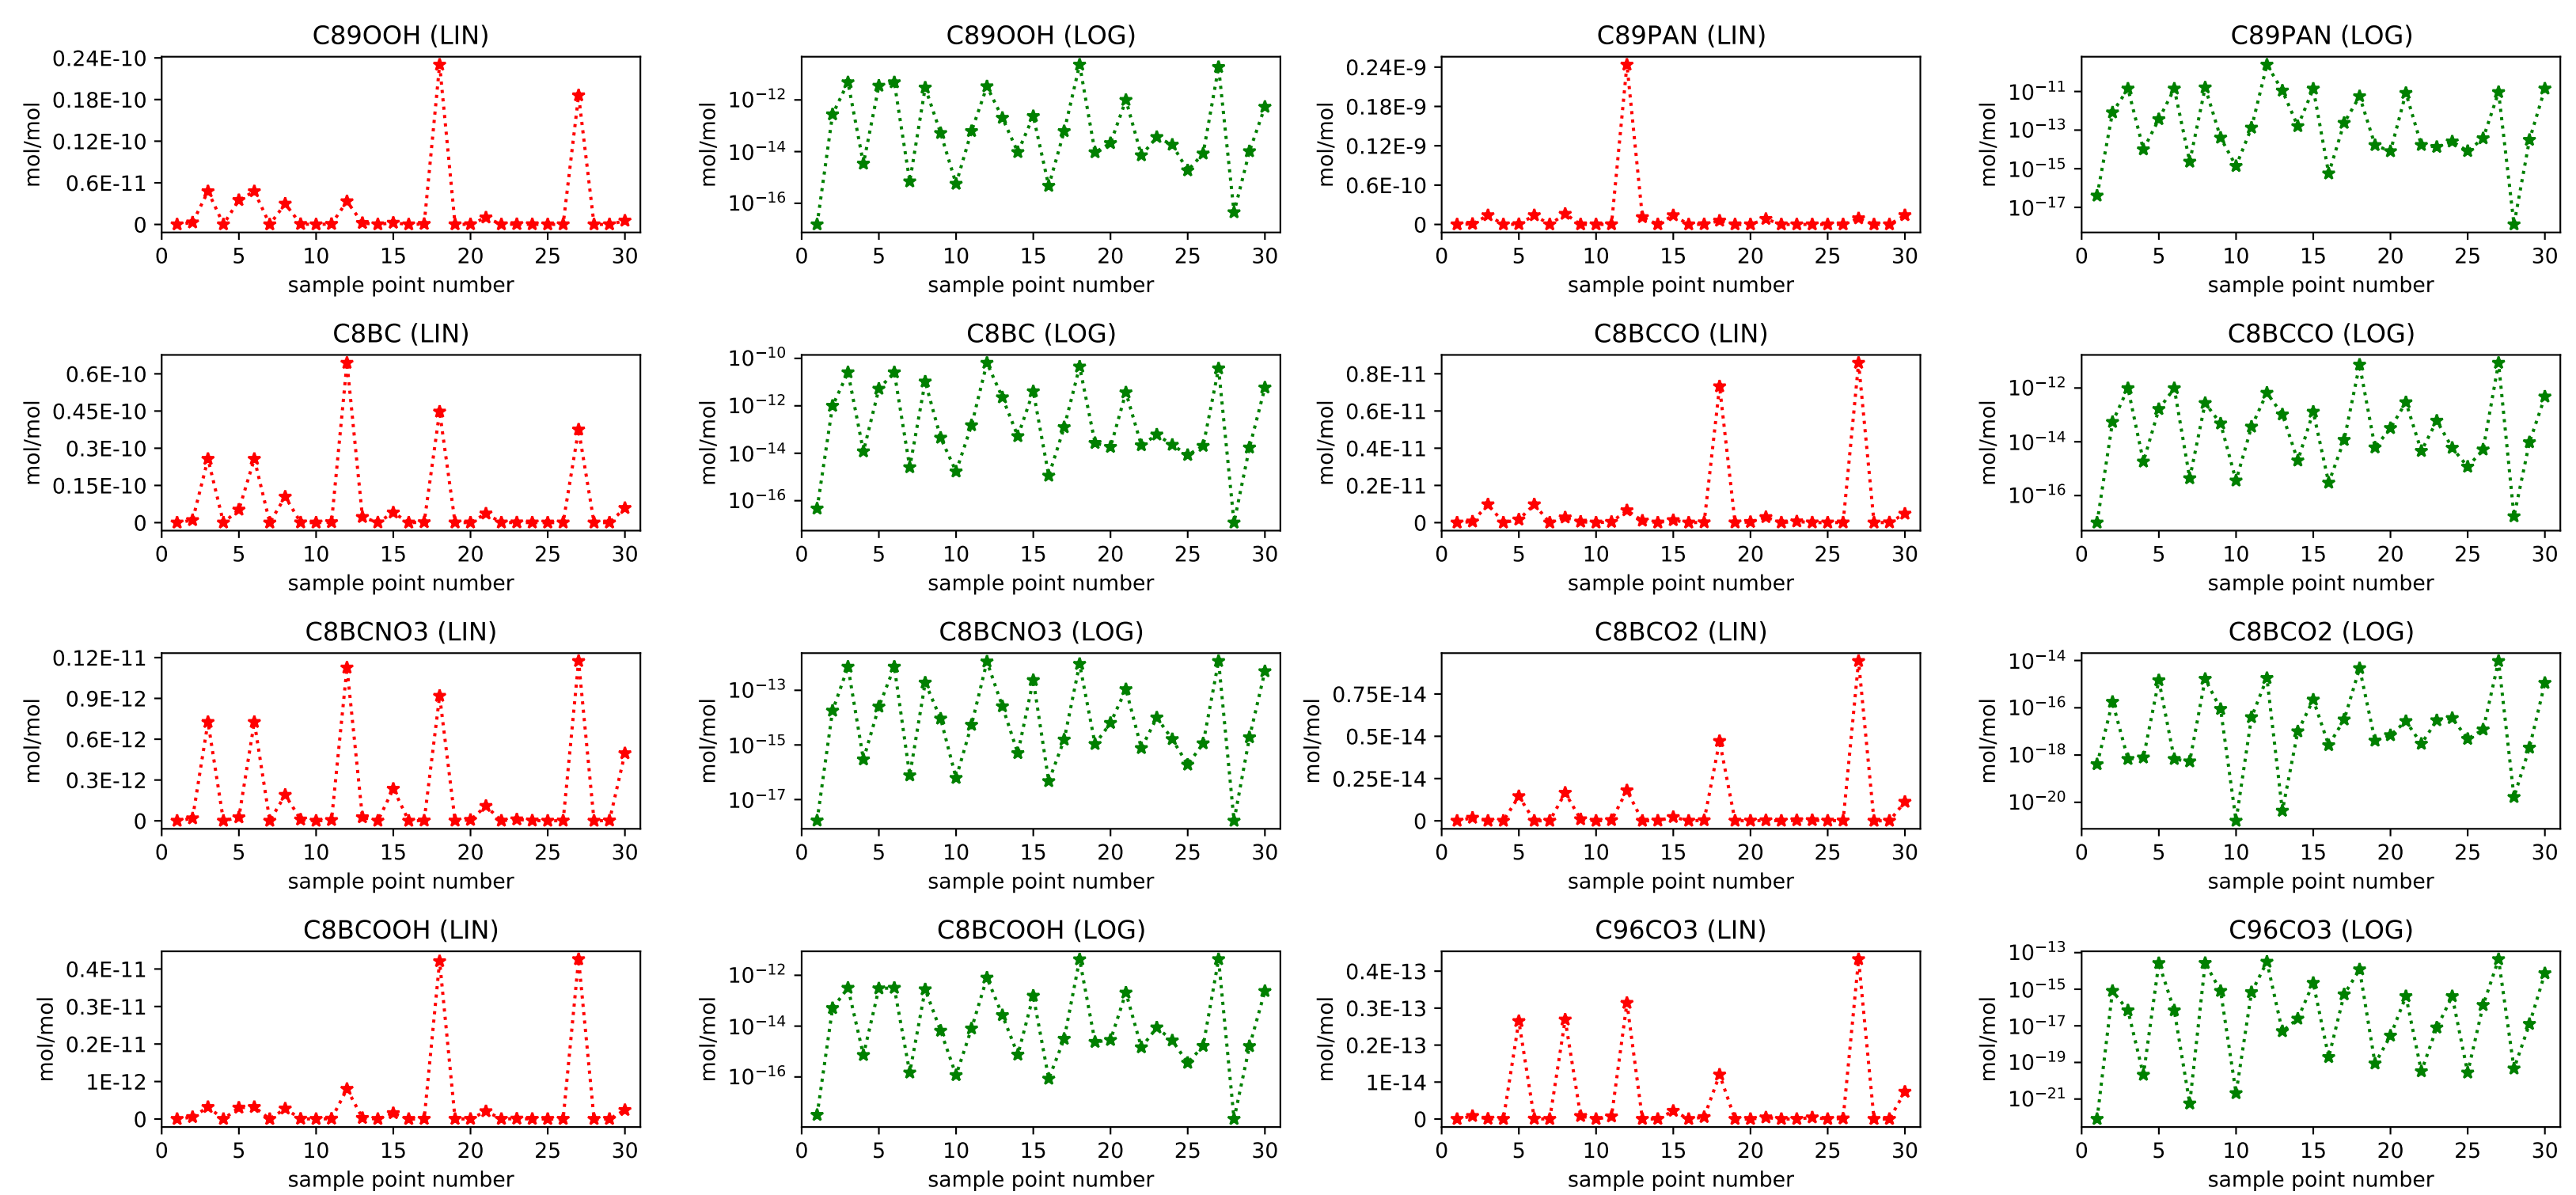

C96NO3 (LIN)

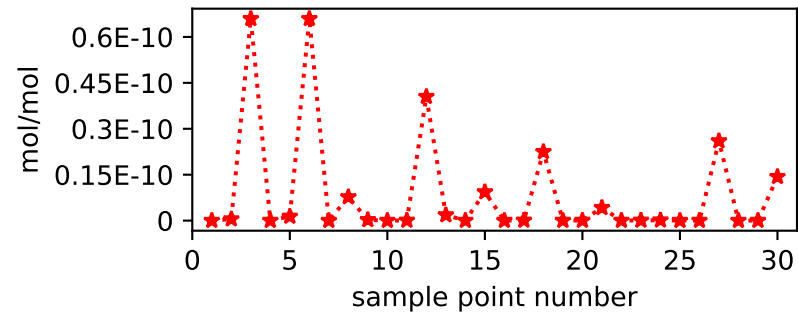

C96NO3 (LOG)

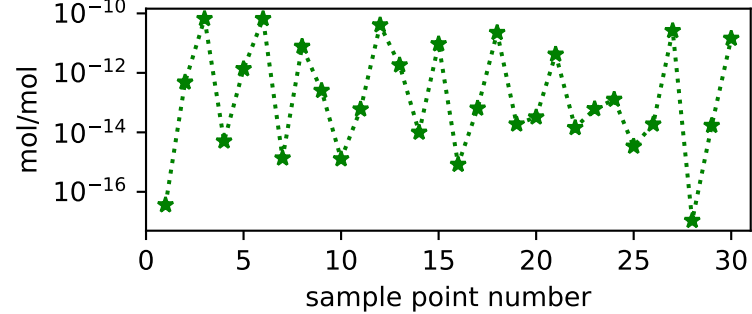

C96O2 (LIN)

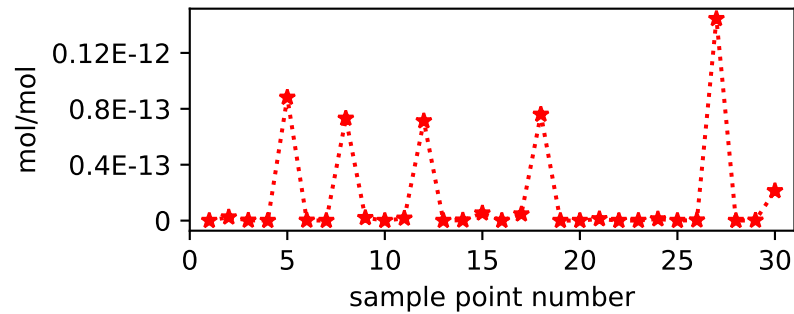

C96O2 (LOG)

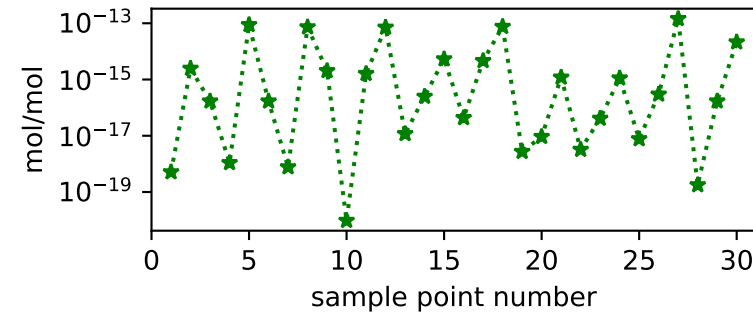

C96OOH (LIN)

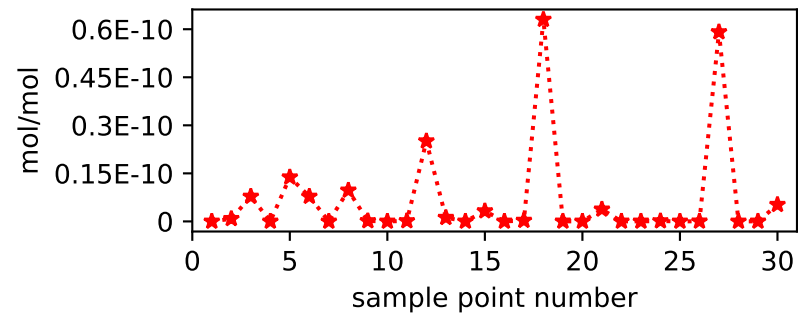

CAMPHENE (LIN)

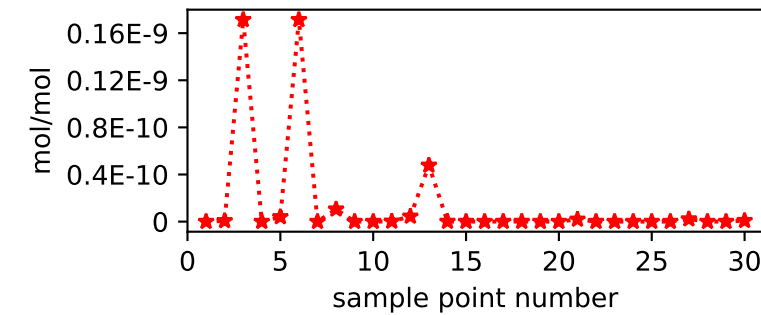

CAMPHENE (LOG)

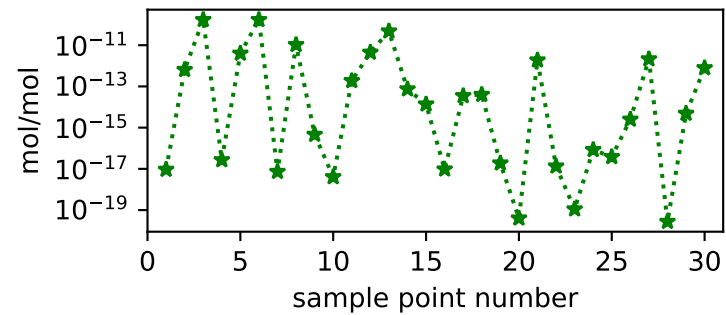

CARENE (LIN)

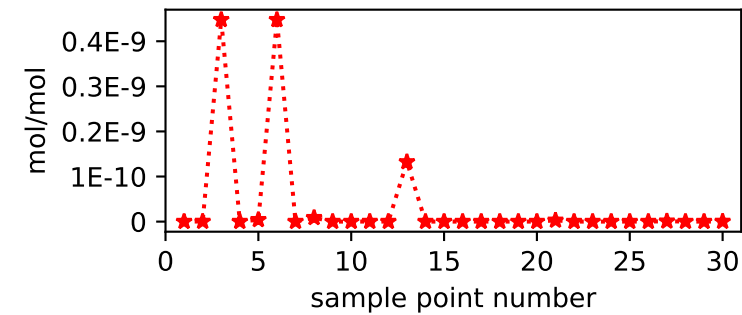

CARENE (LOG)

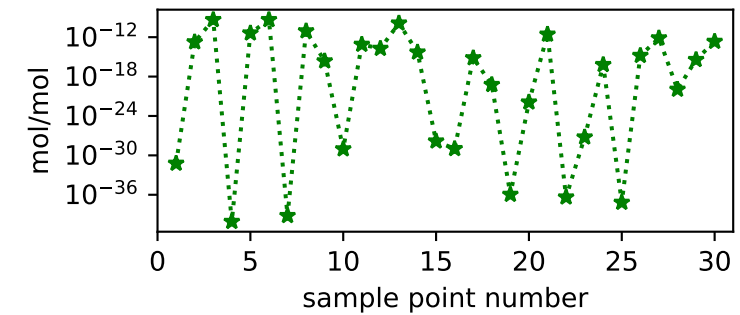

CATEC10 (LIN)

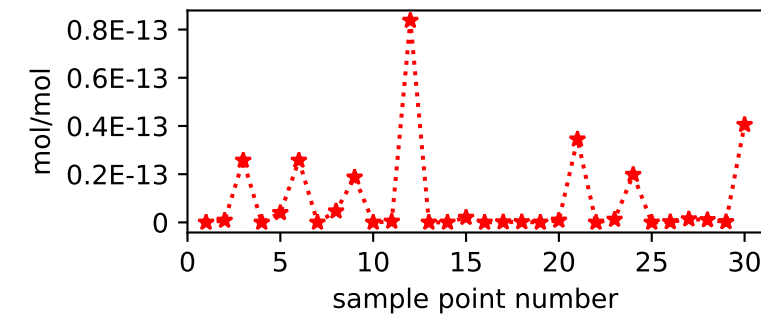





CH3CHOHOOH (LIN)

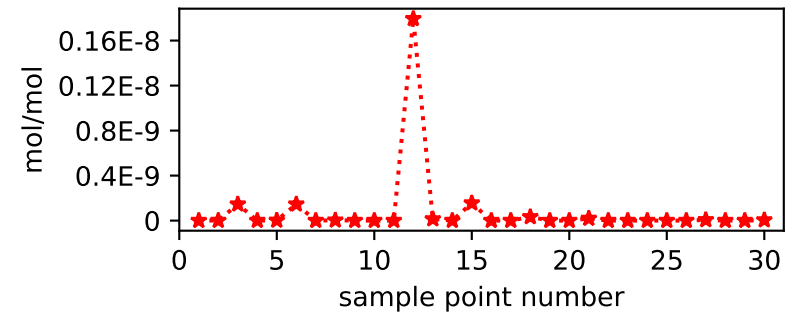

CH3CHOHOOH (LOG)

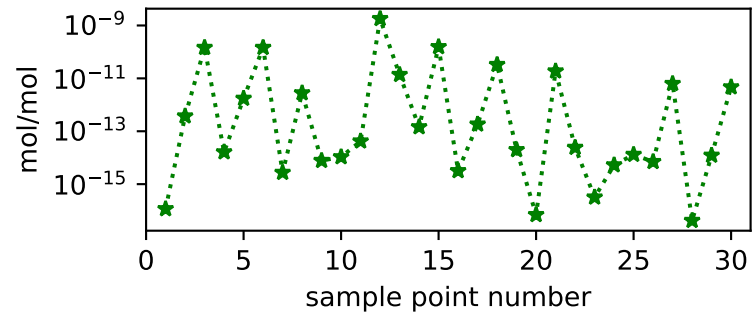

CH3CN (LIN)

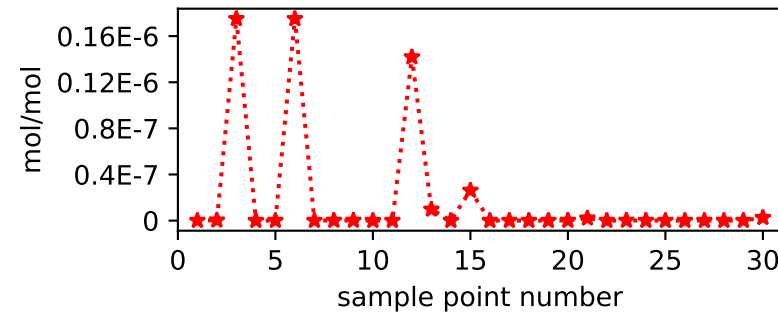

CH3CN (LOG)

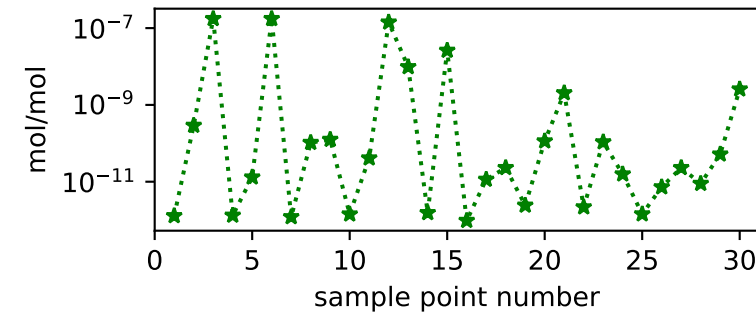



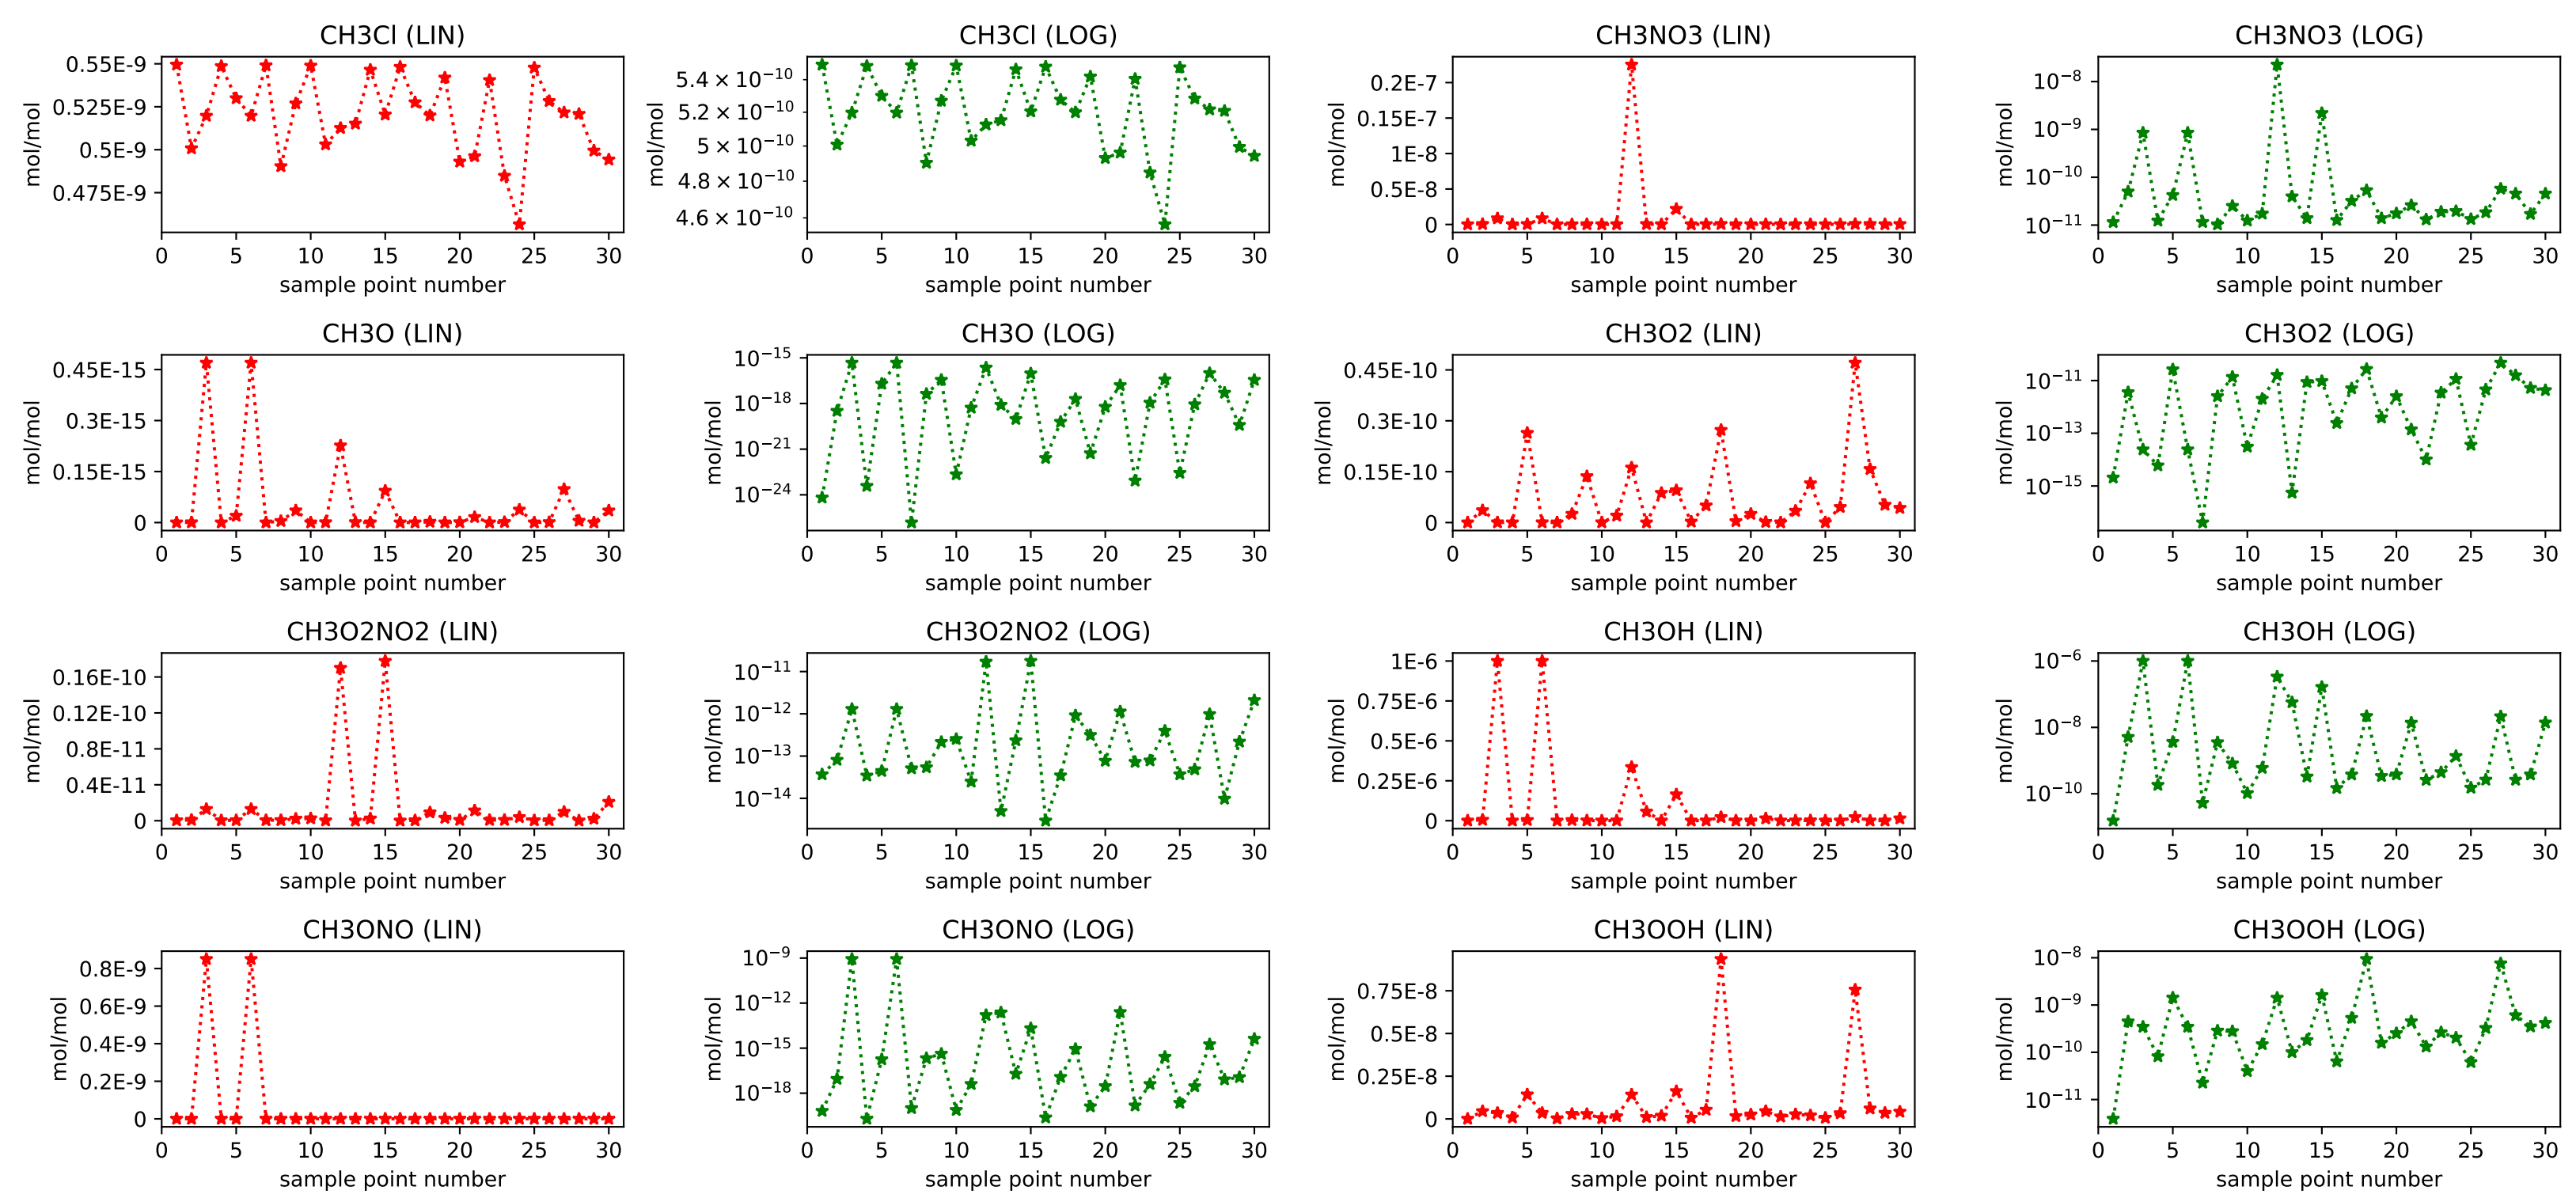



CHOC3COO2 (LIN)

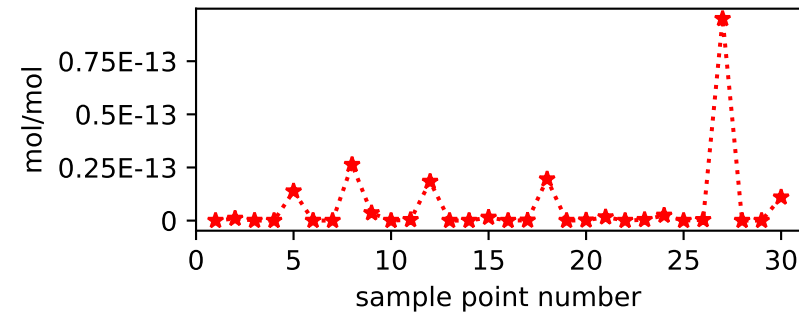

CHOC3COO2 (LOG)

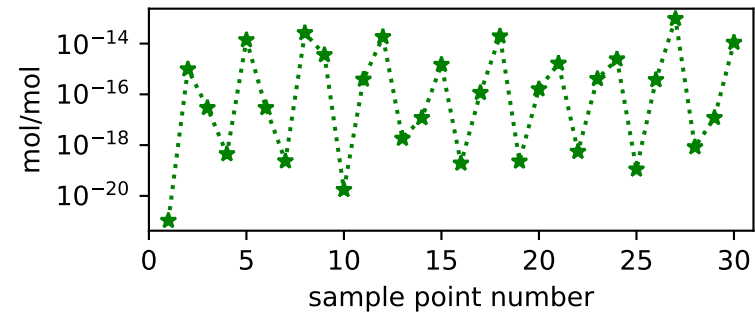

CHOC3COOOH (LIN)

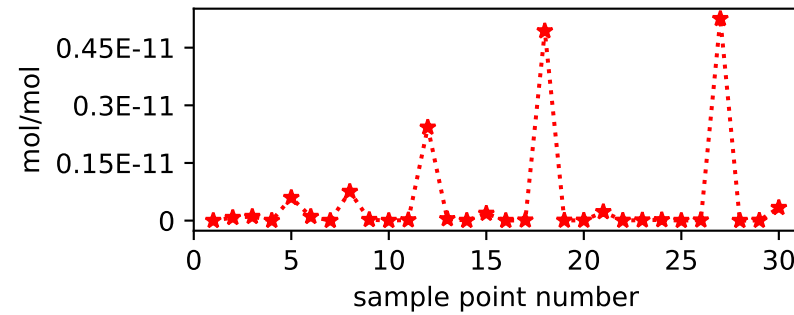

CHOC3COOOH (LOG)

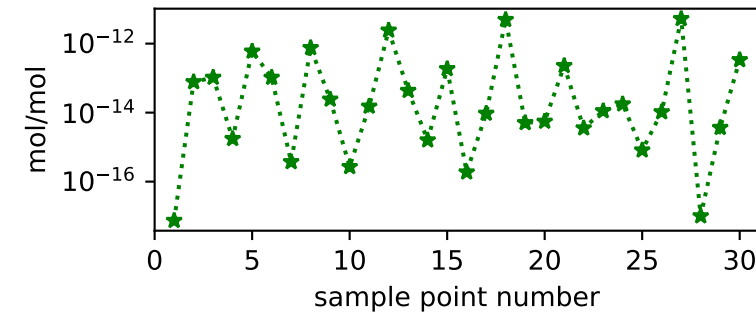

CHOC3COPAN (LIN)

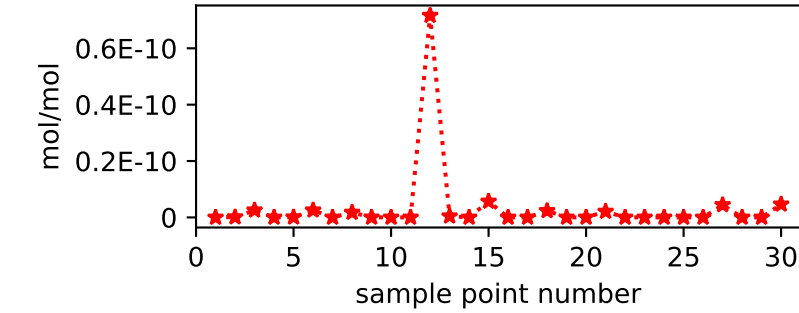



CO23C4CHO (LIN)

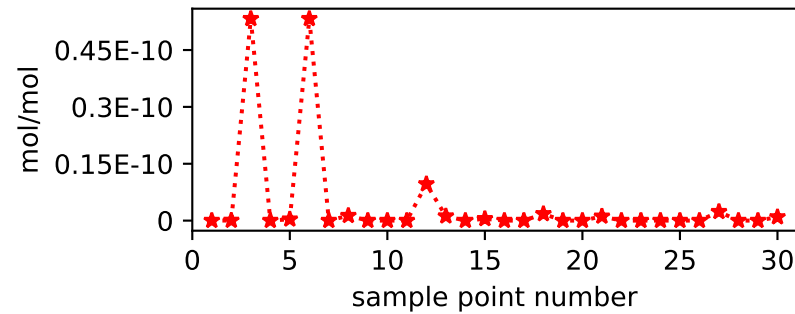

CO23C4CHO (LOG)

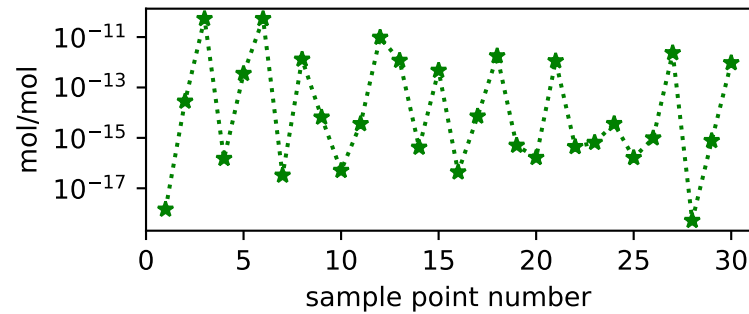

CO23C4CO3 (LIN)

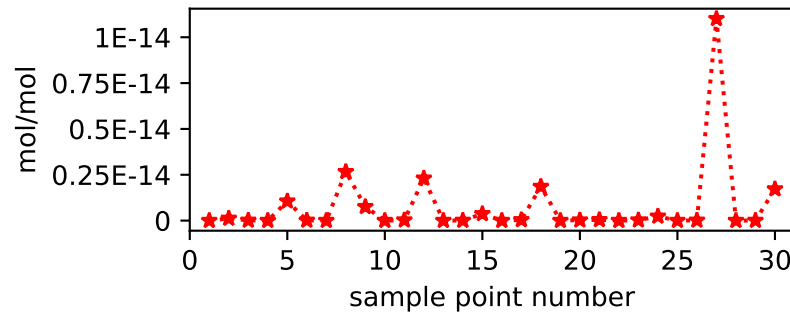

CO23C4CO3 (LOG)

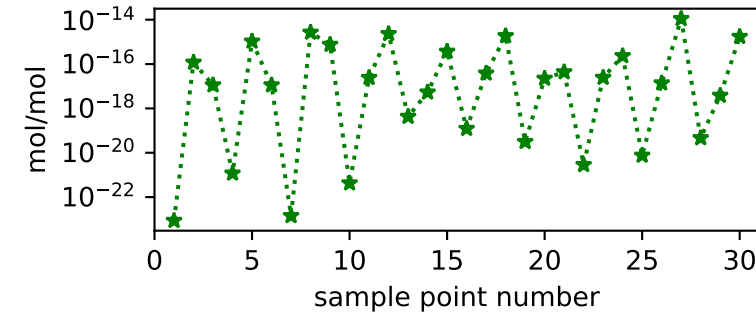

CO2H3CO3H (LIN)

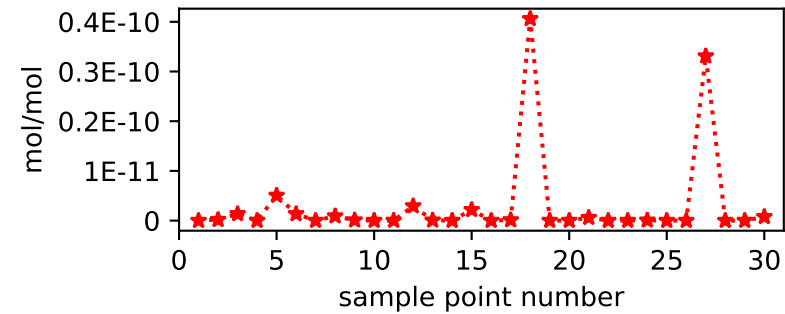

CO2H3CO3H (LOG)

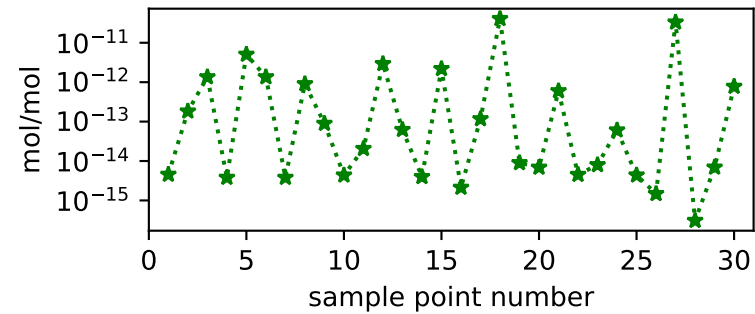

CPDKETENE (LIN)

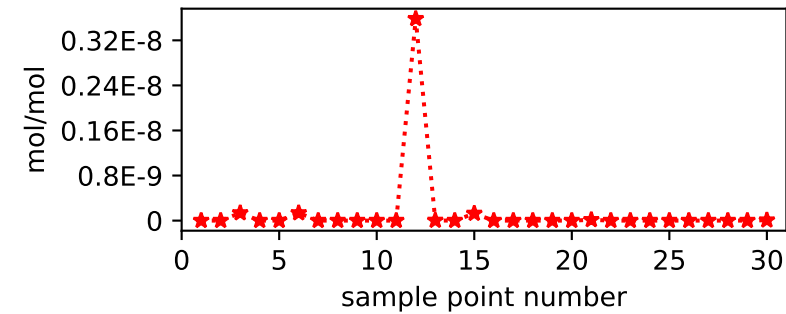

CPDKETENE (LOG)

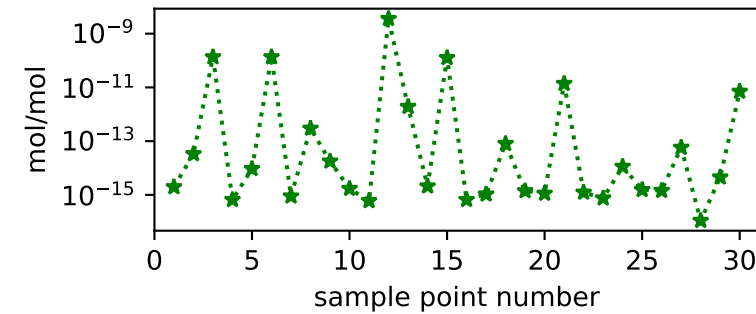

CRESO2 (LIN)

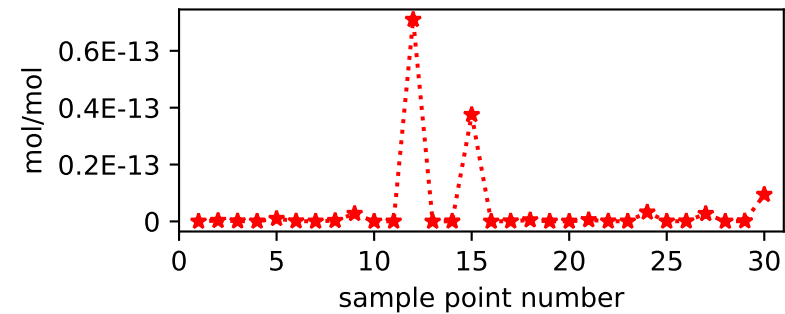

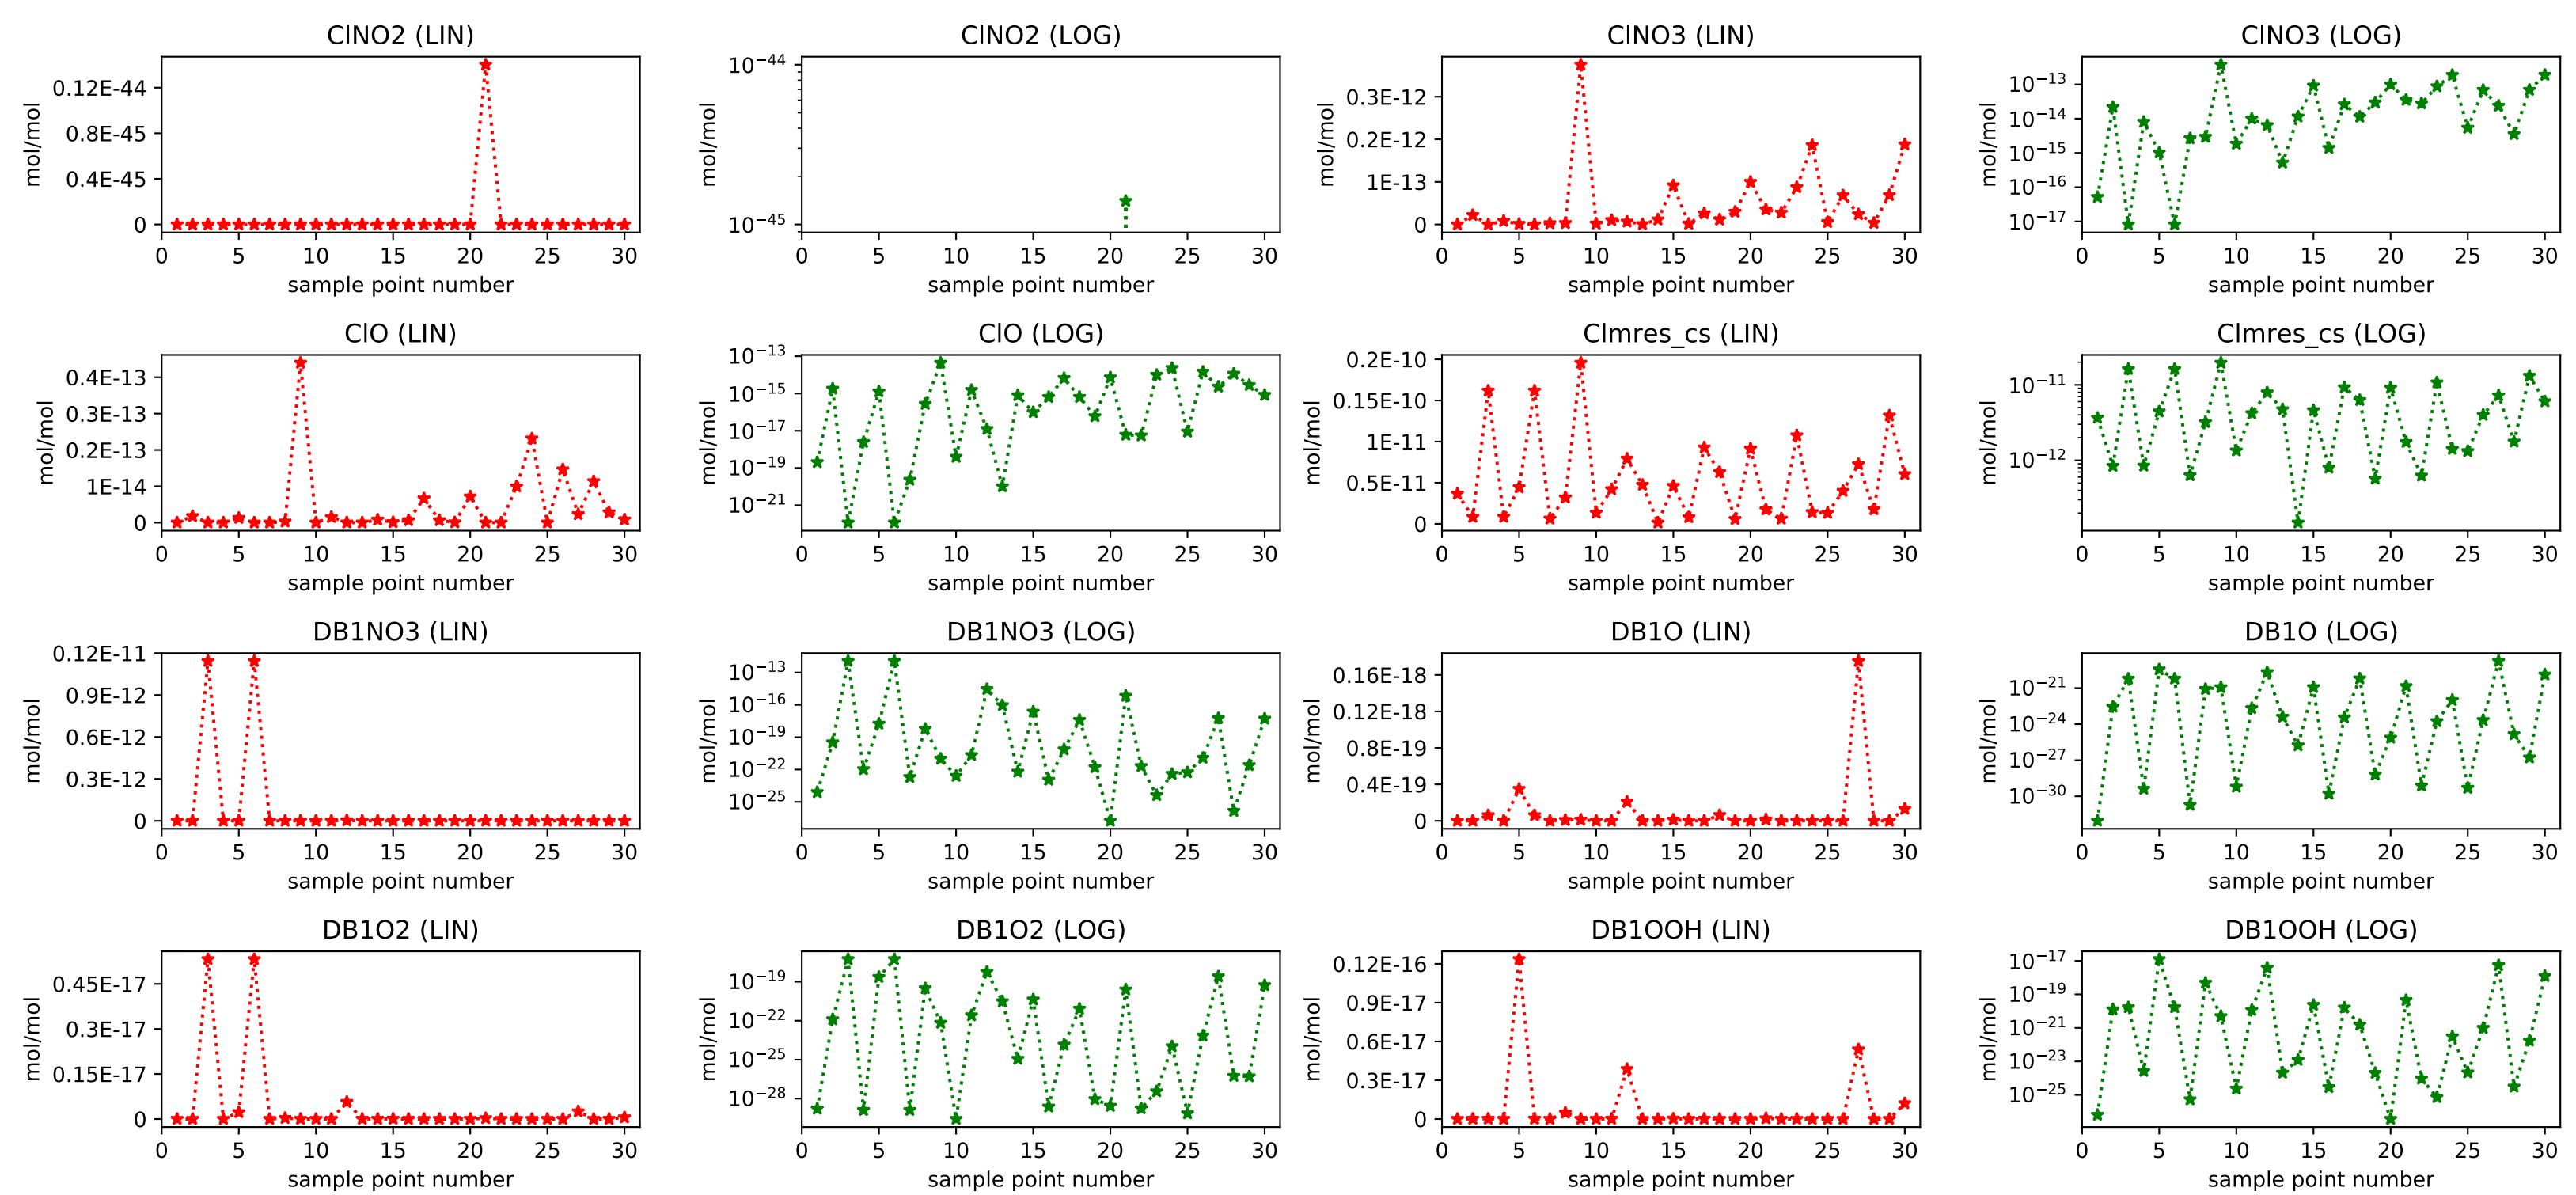

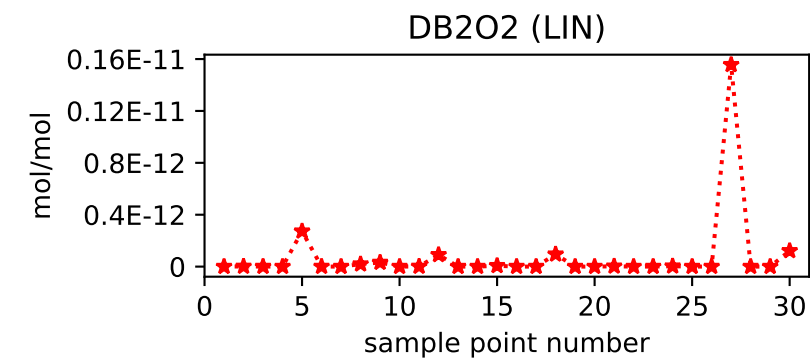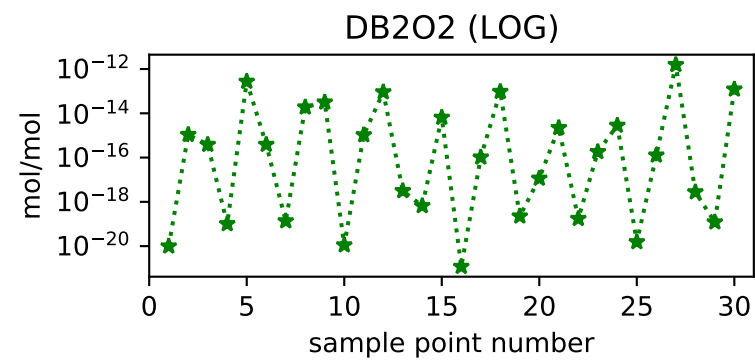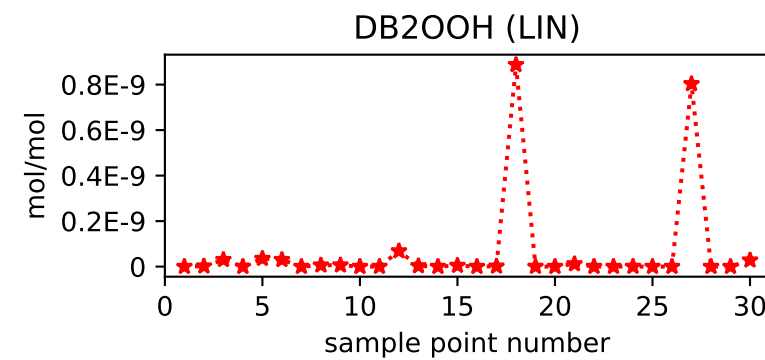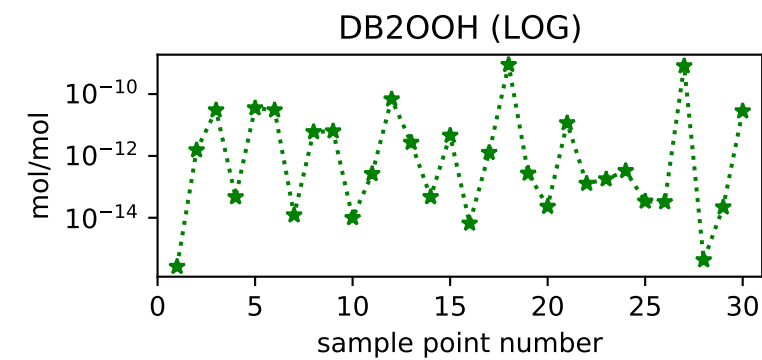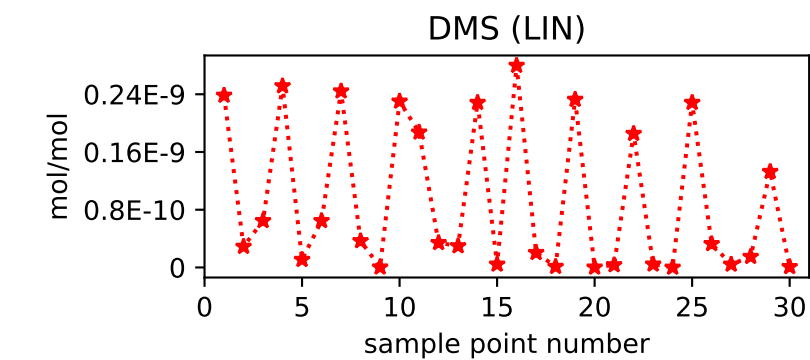

DNPHEO2 (LIN)

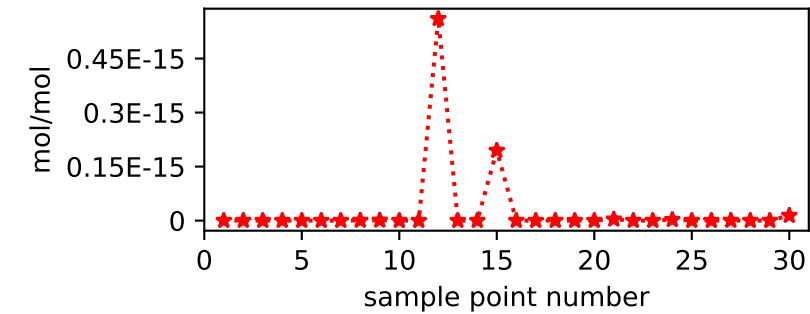

DNPHEO2 (LOG)

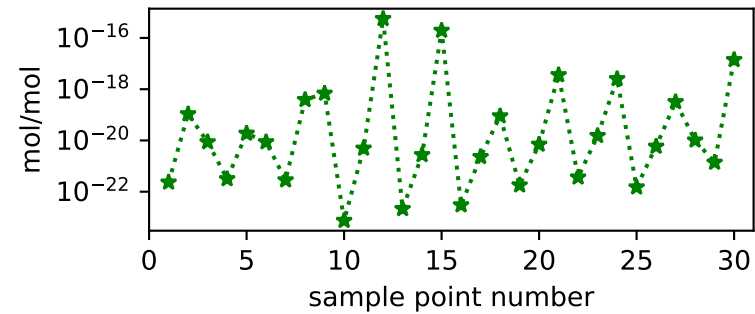

DNPHEO2 (LOG)

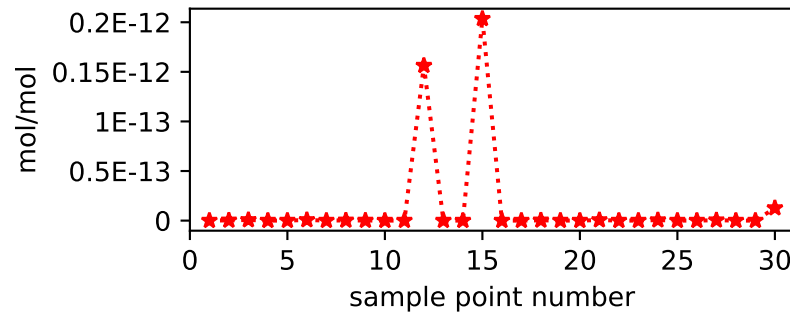

DNPHEO2 (LOG)

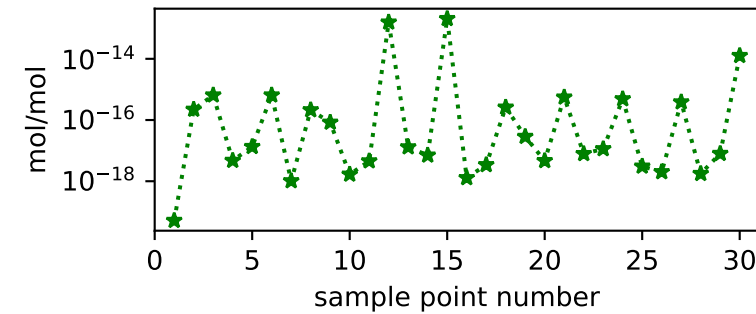

EBENZ (LIN)

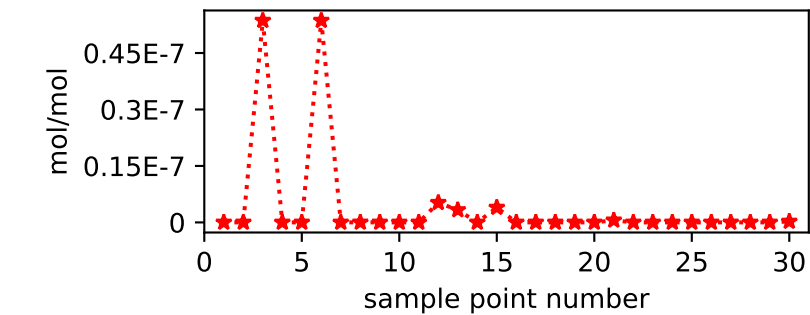

ETHGLY (LIN)

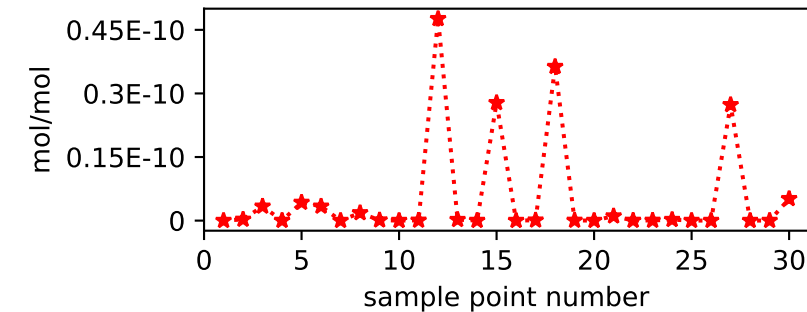

ETHGLY (LOG)

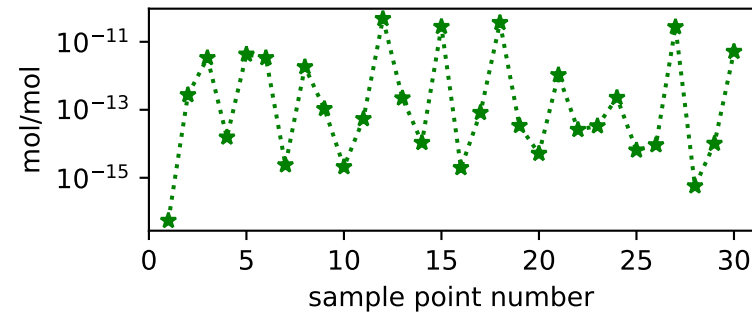

ETHOHN03 (LIN)

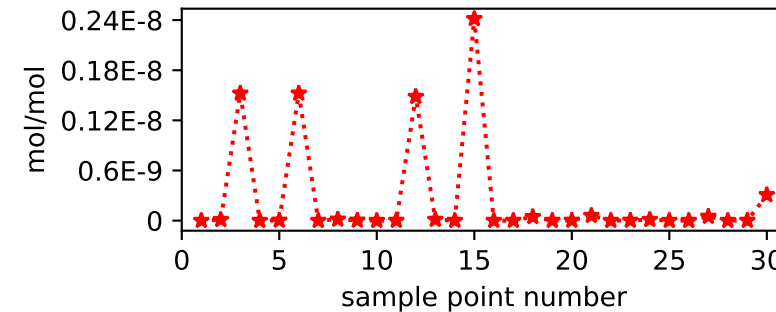

ETHOHN03 (LOG)

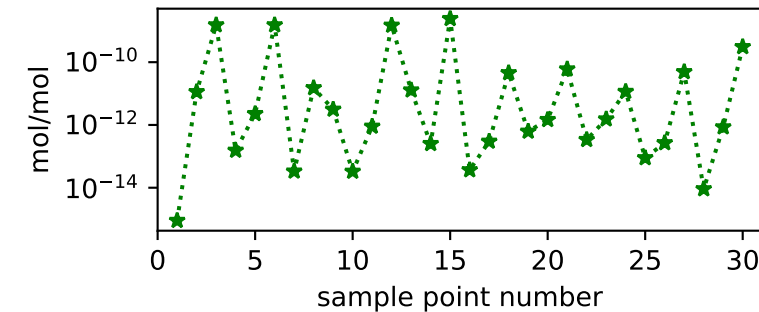

Supplement: Supplementary file 20 [file gmd-2020-337-supplement.zip › caaba_4.5.0gmdd/skeleton/samplepoints/skeleton_samplepoints_30.pdf]
