# Supplementary material for: Oxidation of low-molecular weight organic compounds in clouddroplets: development of the JAMOC chemical mechanism inCAABA/MECCA (version 4.5.0gmdd)
Source: Copernicus journal article supplement (doi:10.5194/gmd-2020-337), 2020-10-29

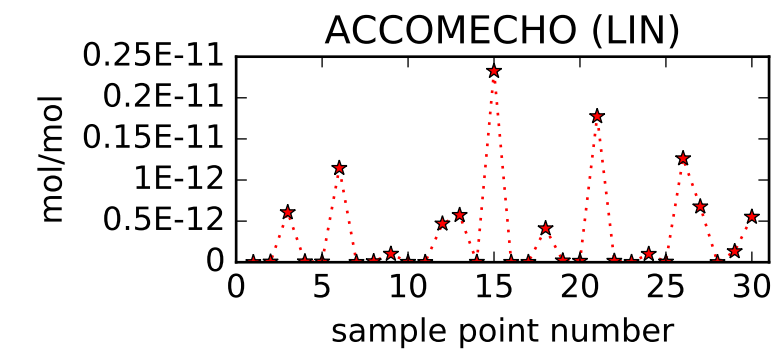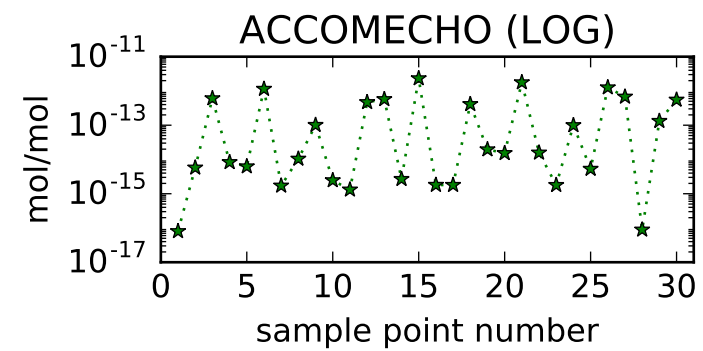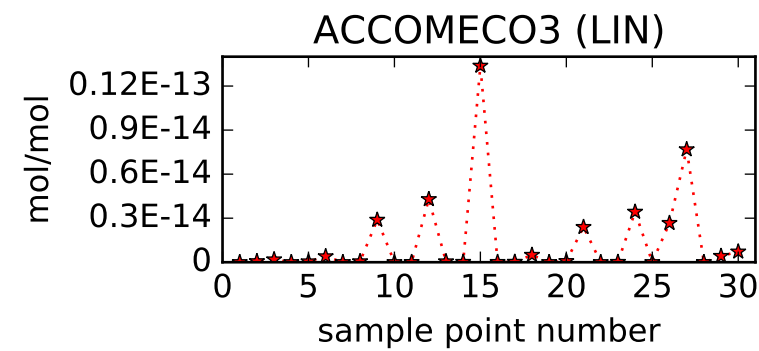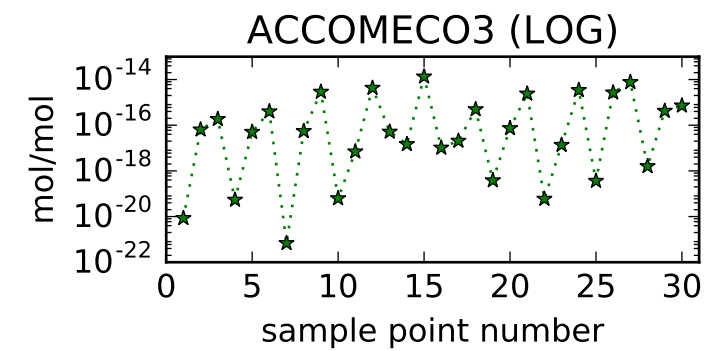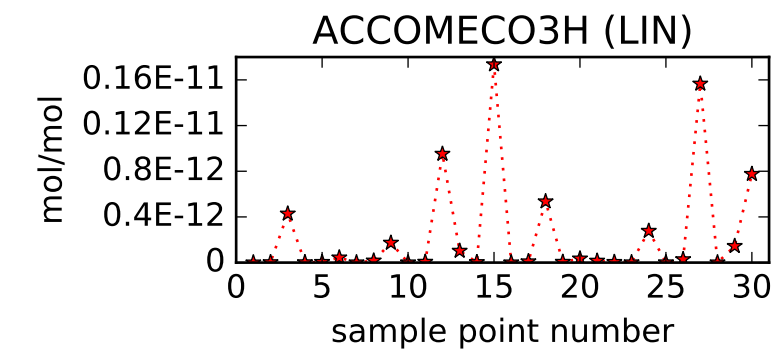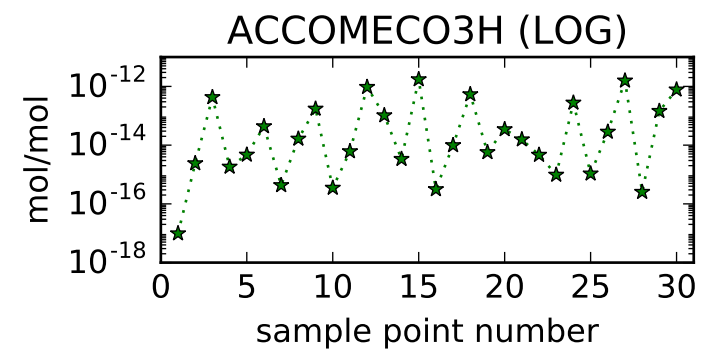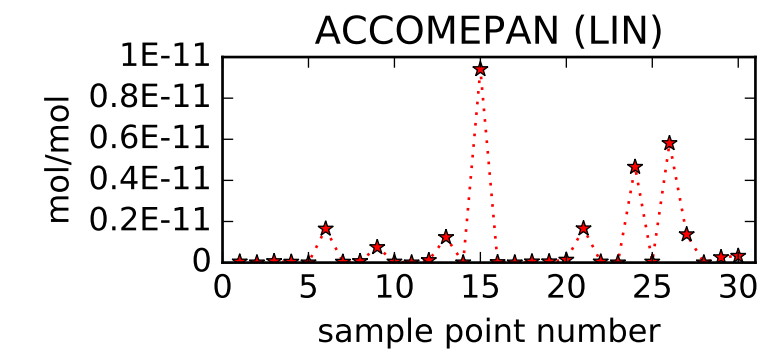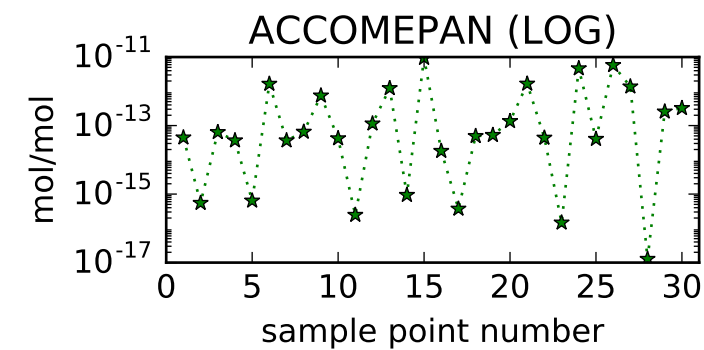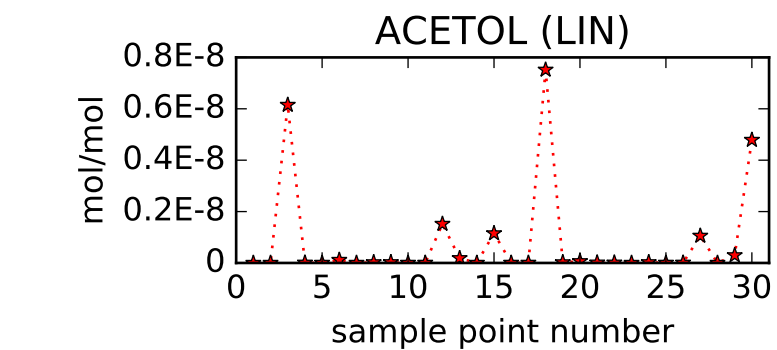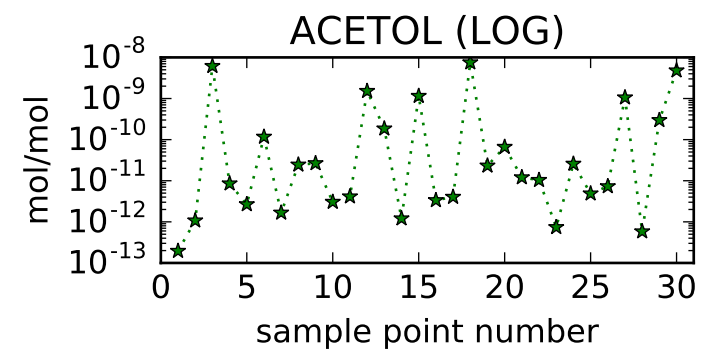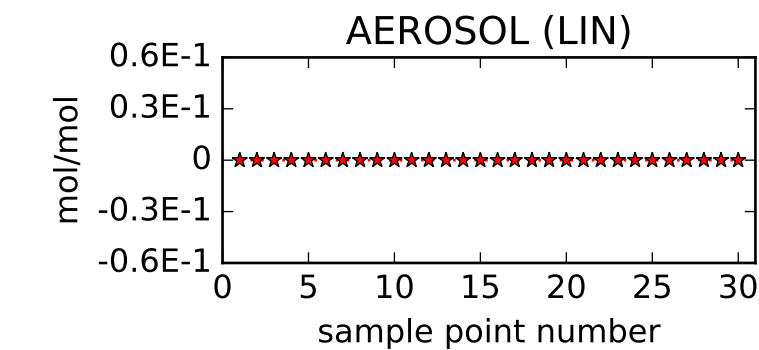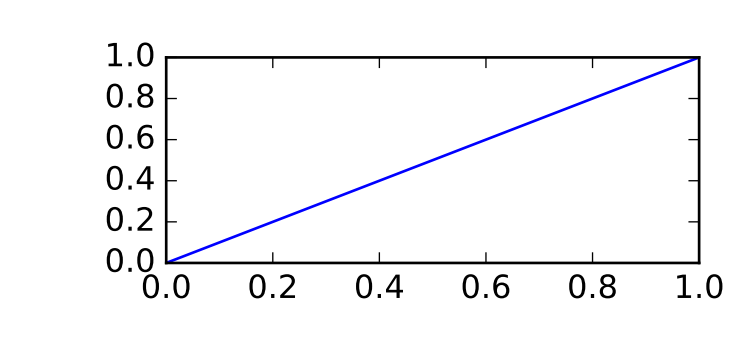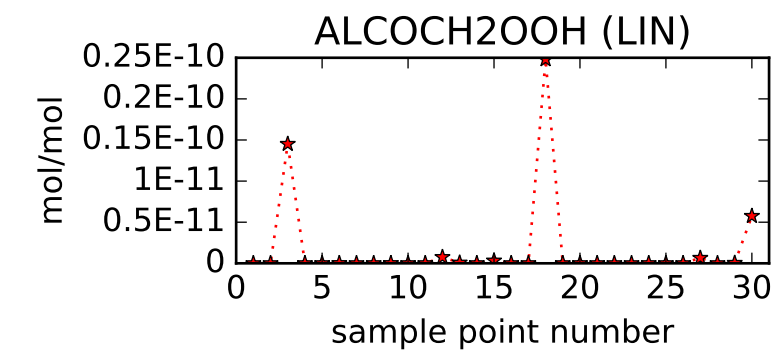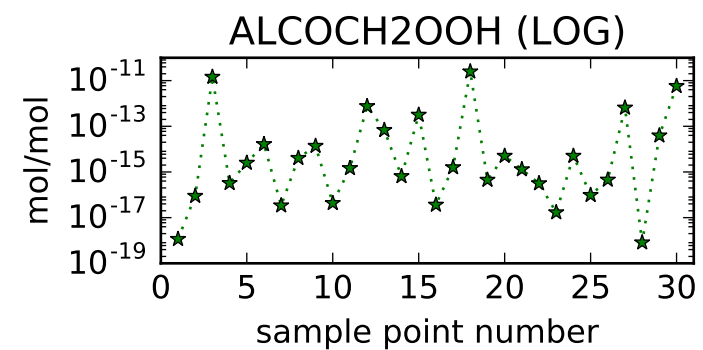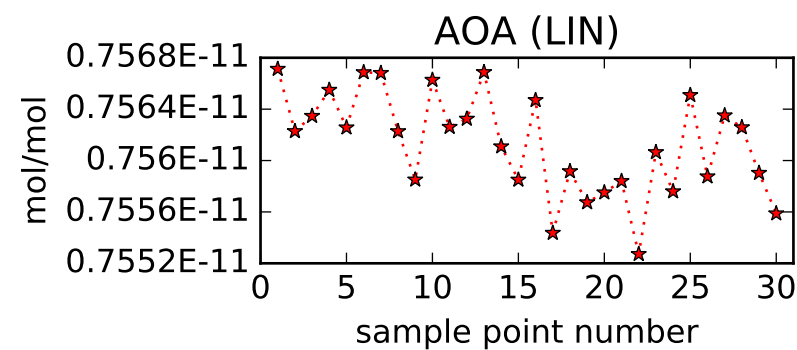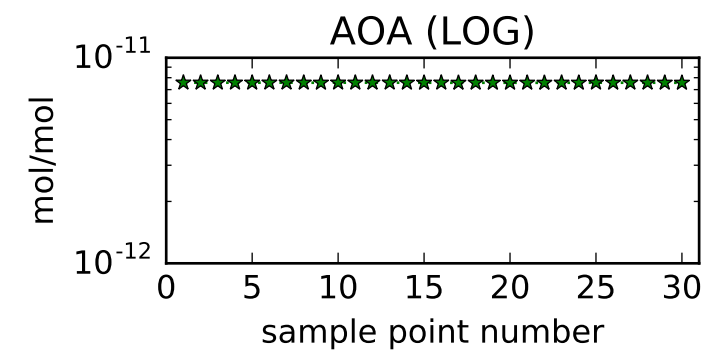

APINAOO (LIN)

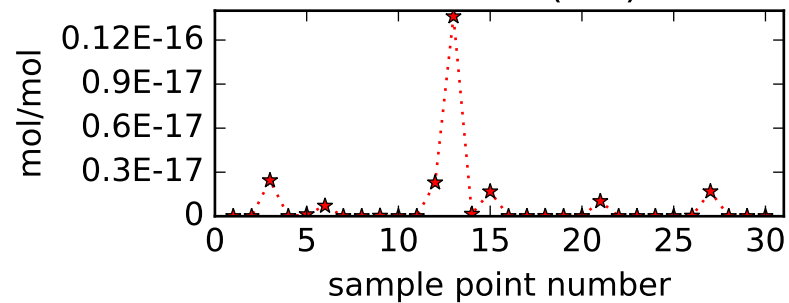

APINAOO (LOG)

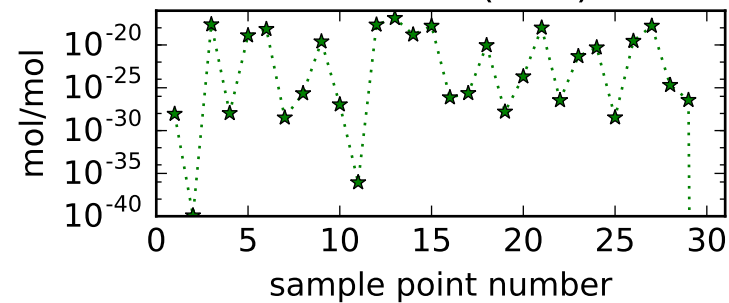

APINBOO (LIN)

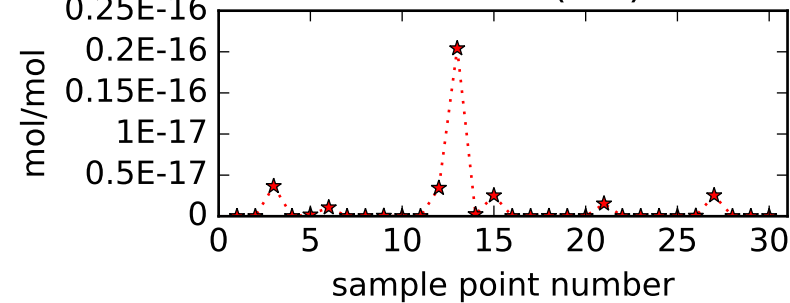

APINBOO (LOG)

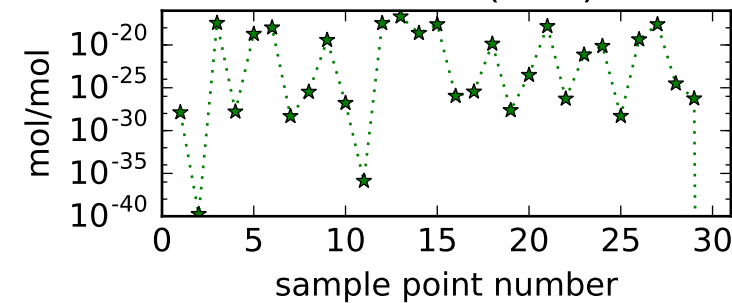

APINENE (LIN)

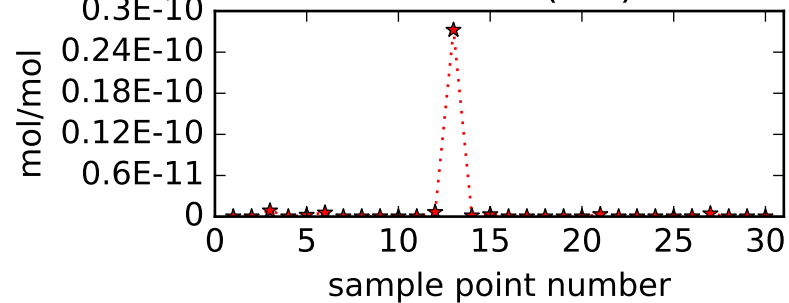

APINENE (LOG)

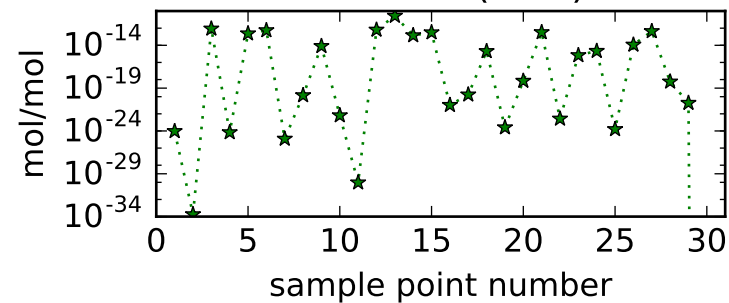

BENZAL (LIN)

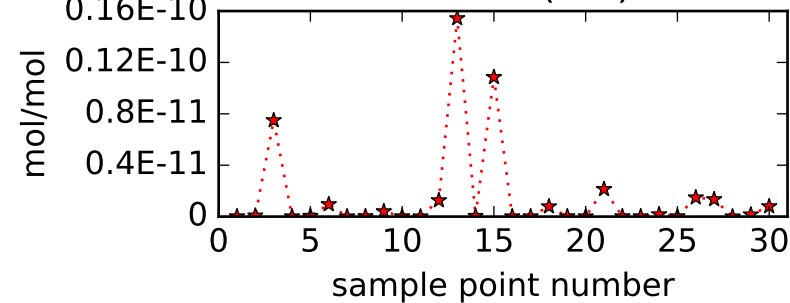

BENZAL (LOG)

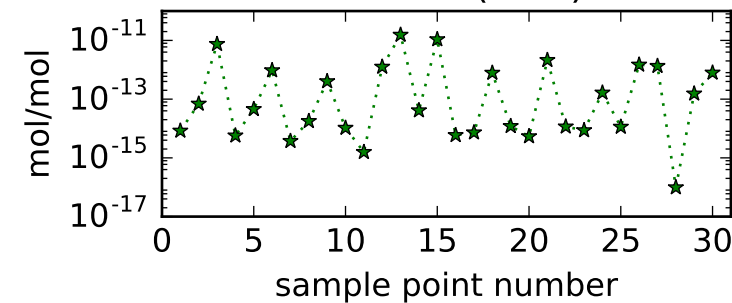

BENZENE (LIN)

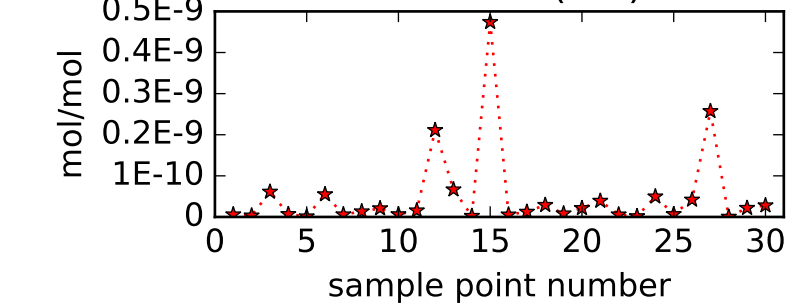

BENZENE (LOG)

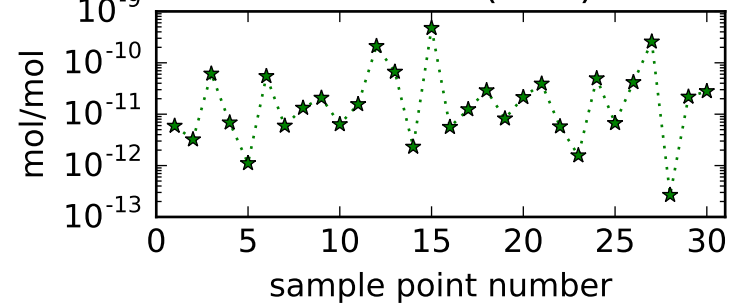

BIACET (LIN)

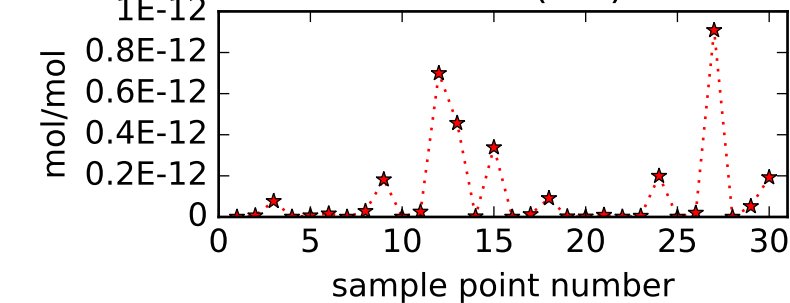

BIACET (LOG)

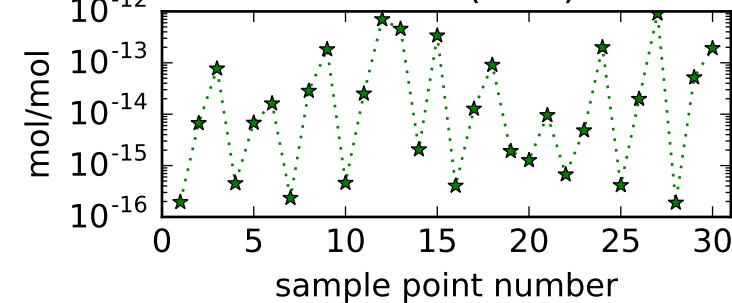

BIACETO2 (LIN)

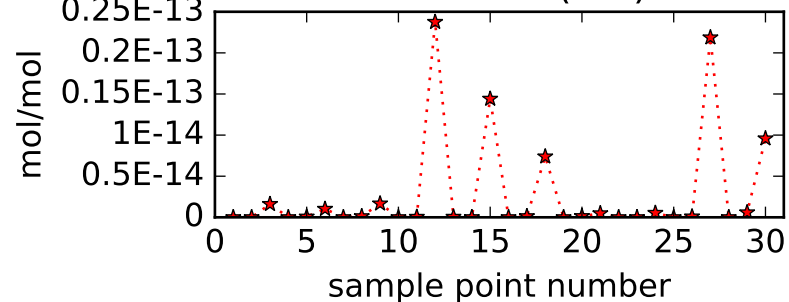

BIACETO2 (LOG)

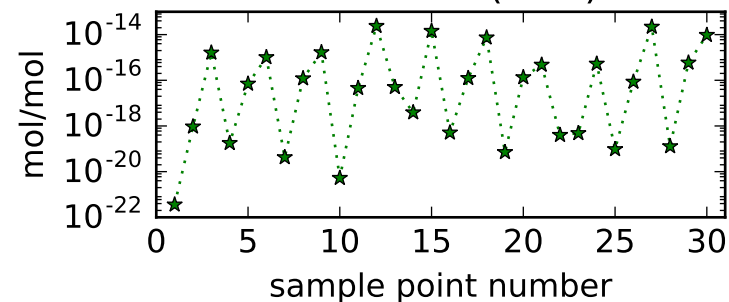

BIACETOH (LIN)

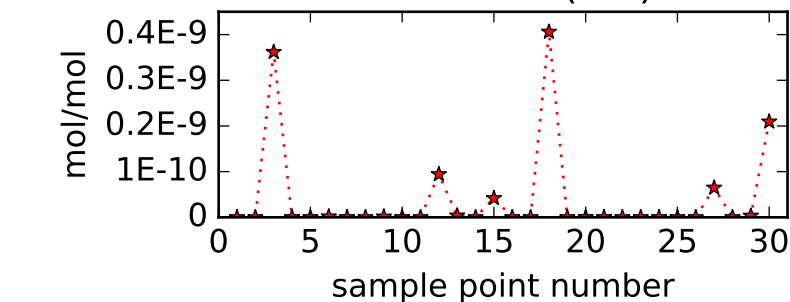

BIACETOH (LOG)

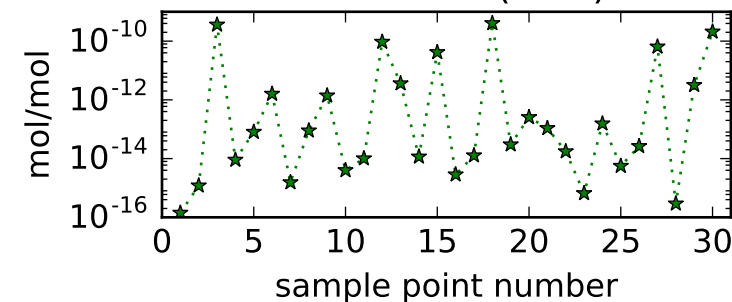

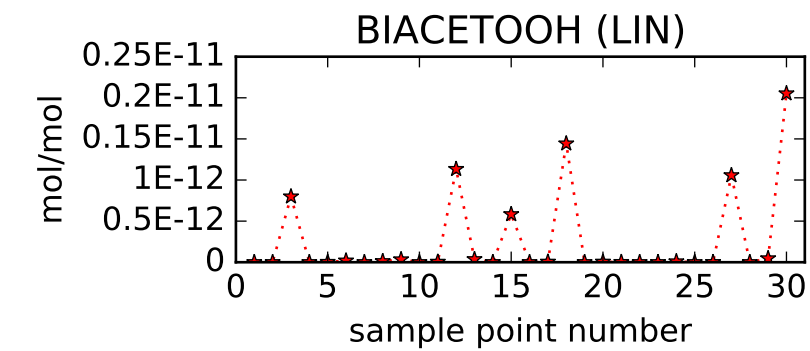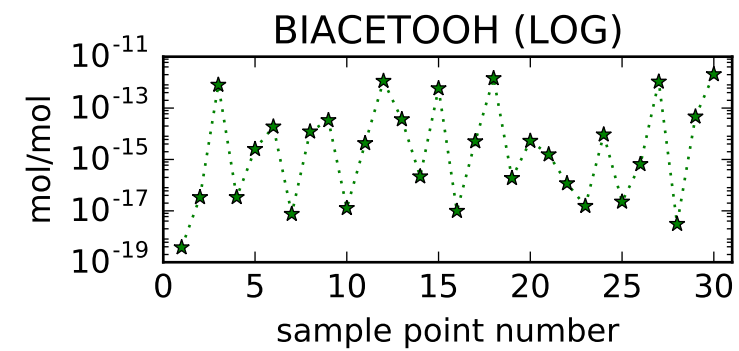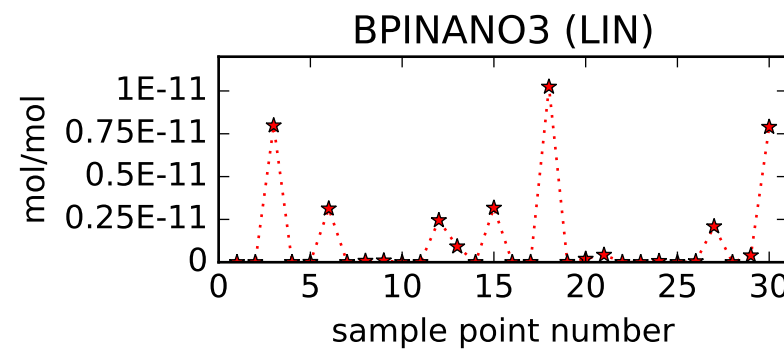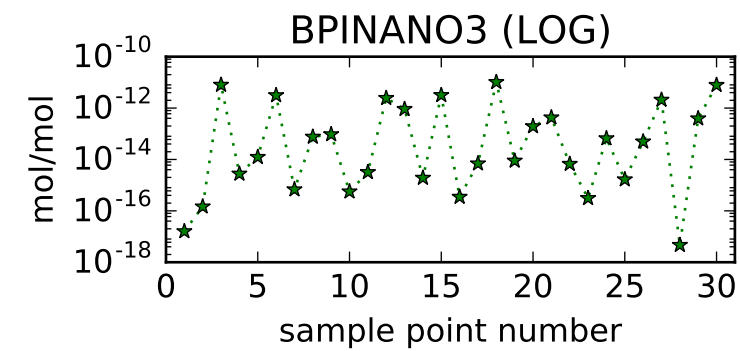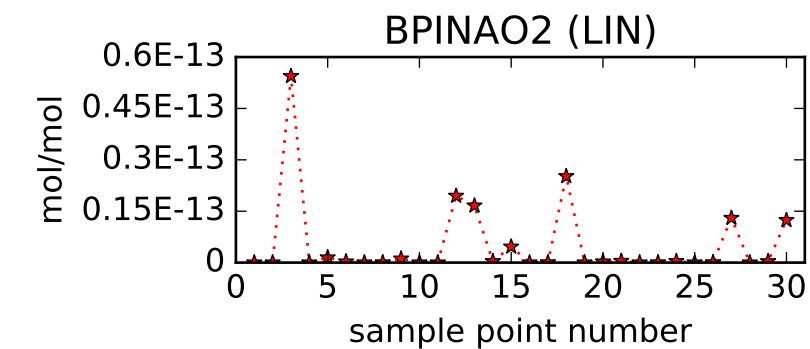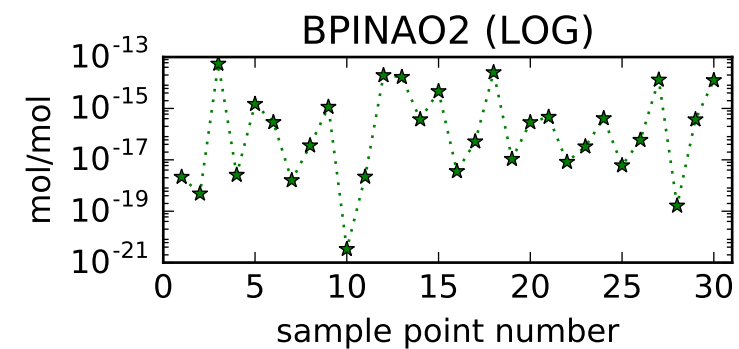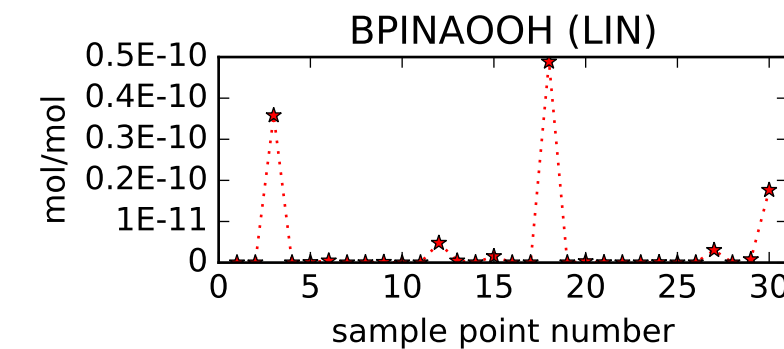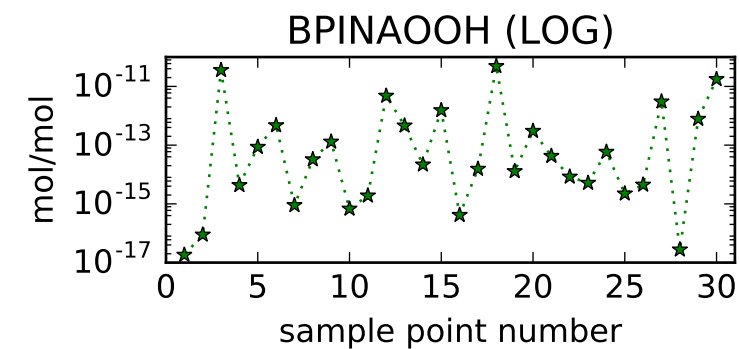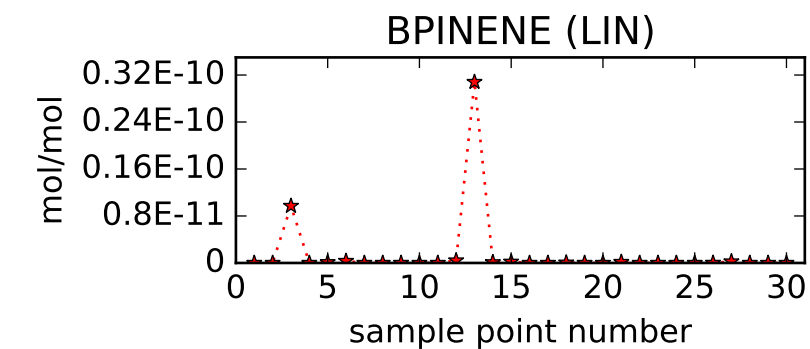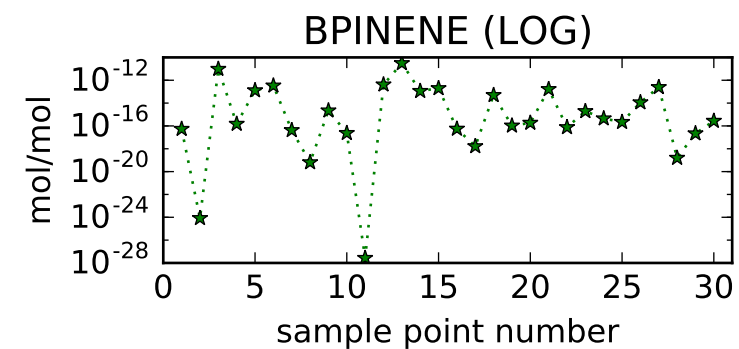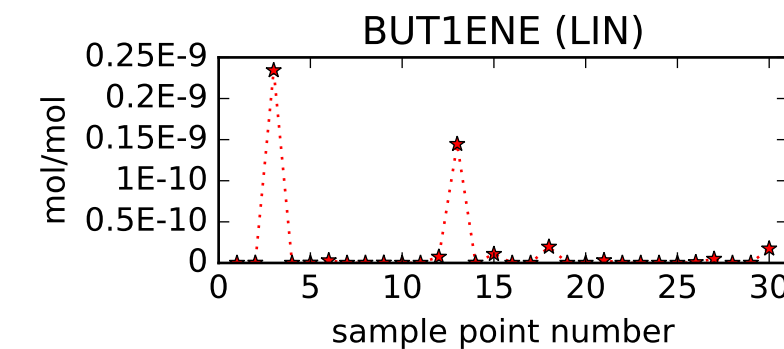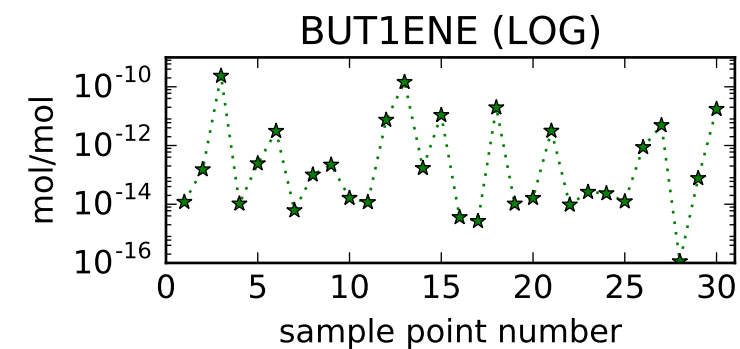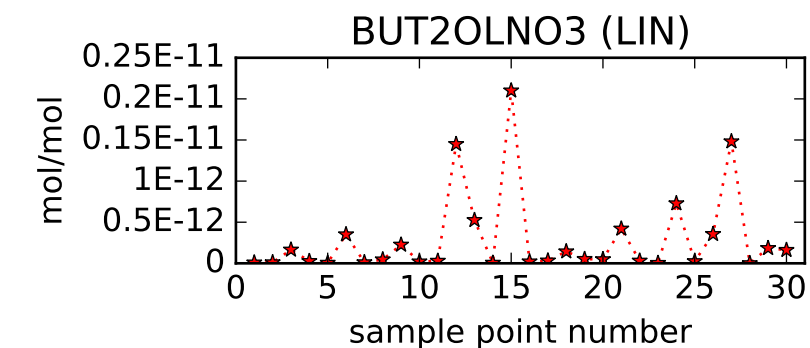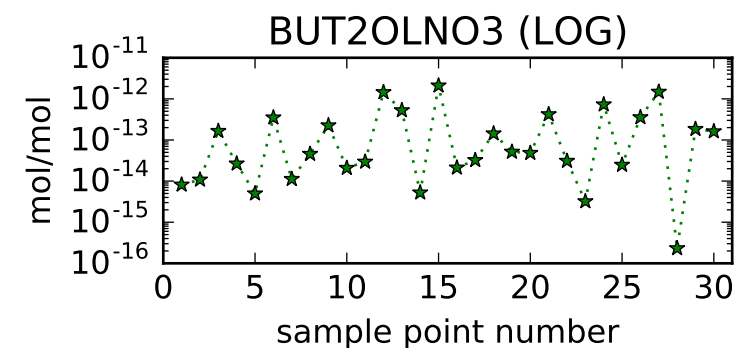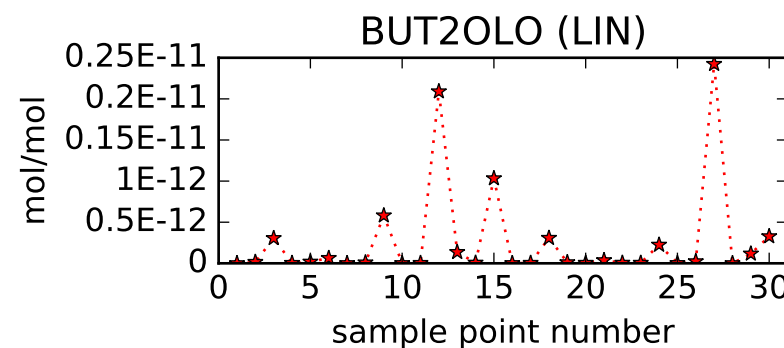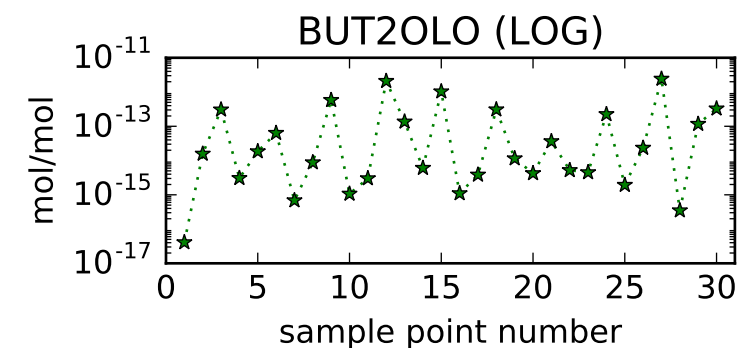

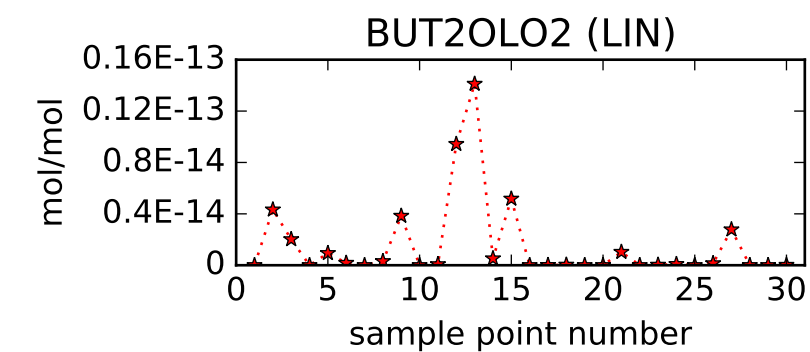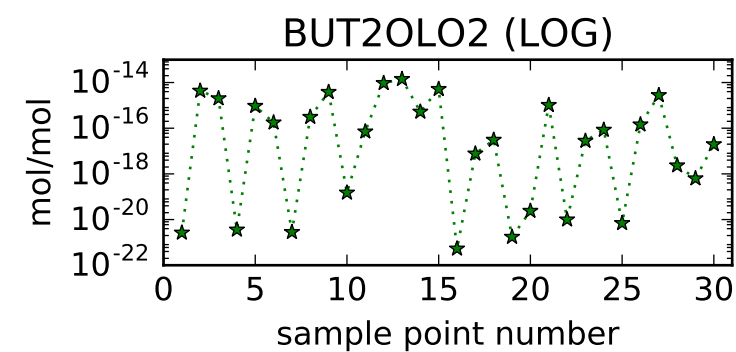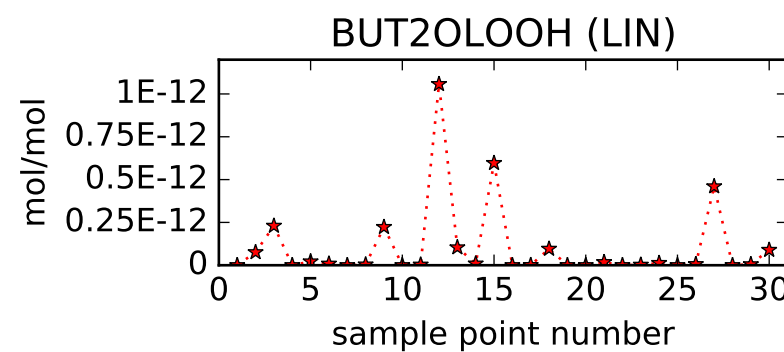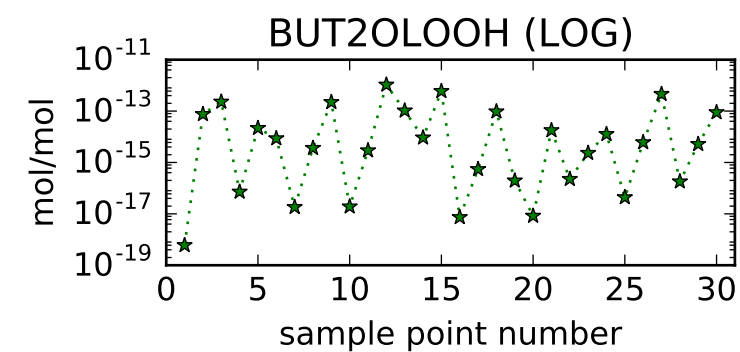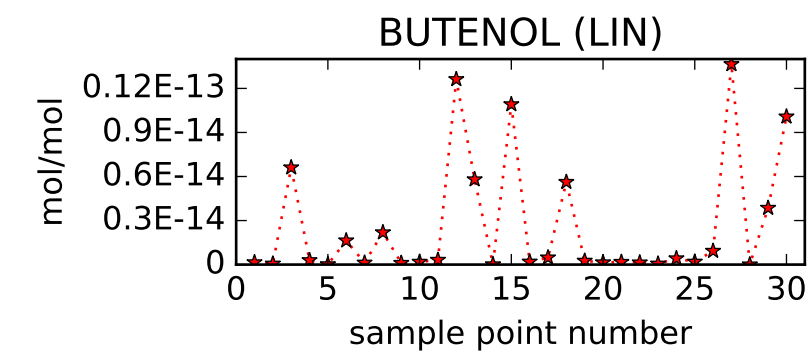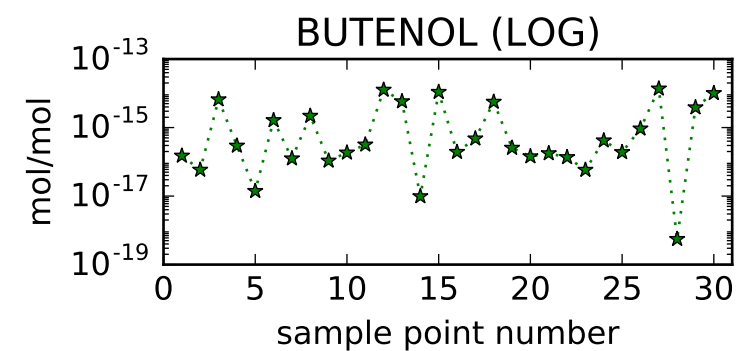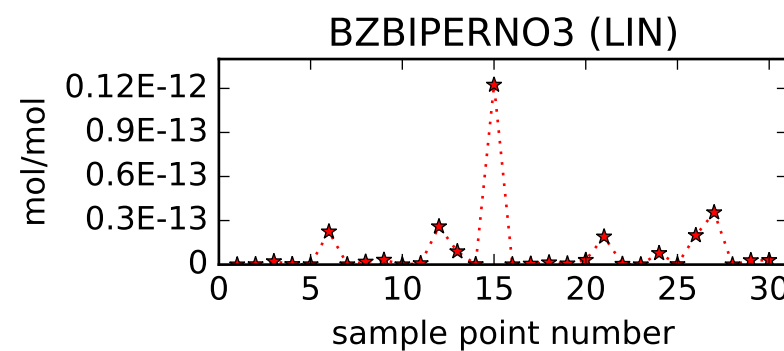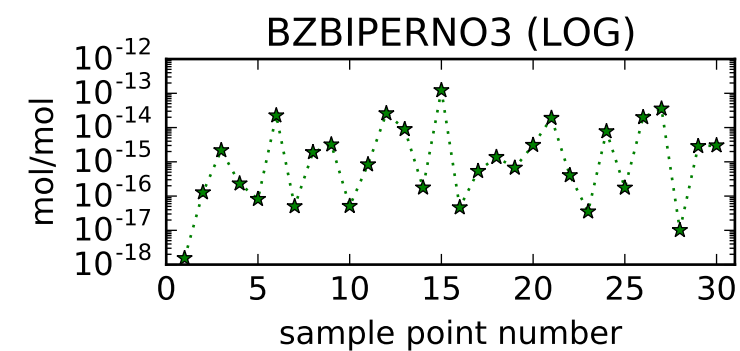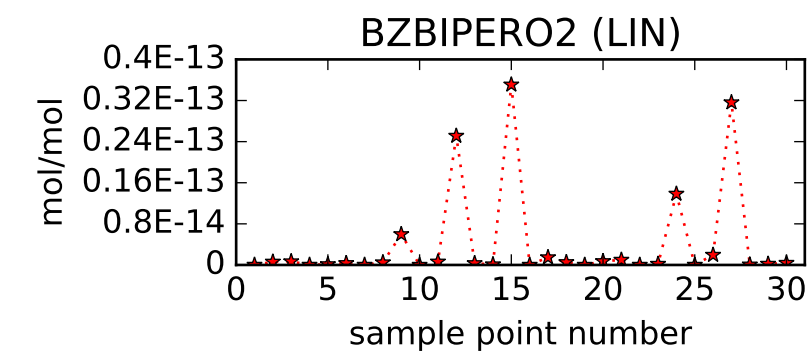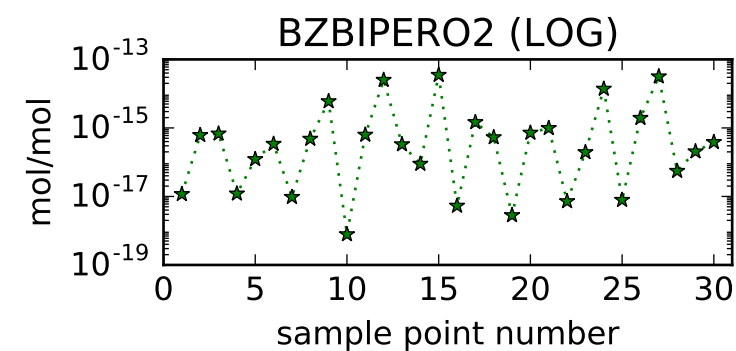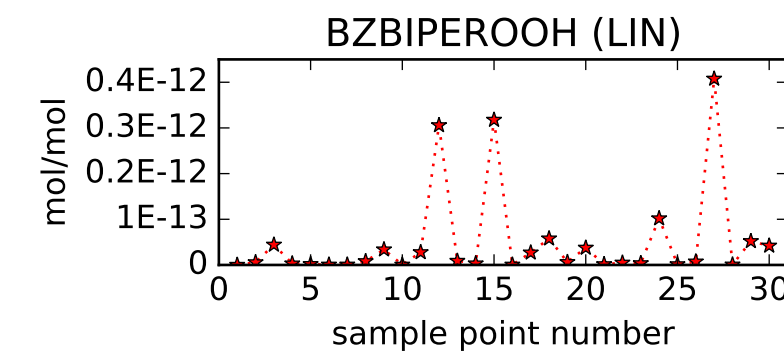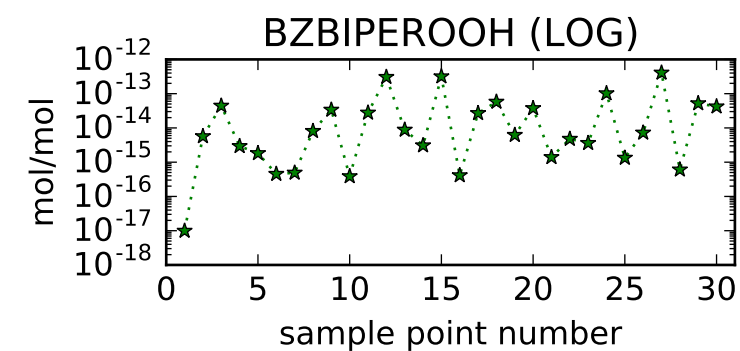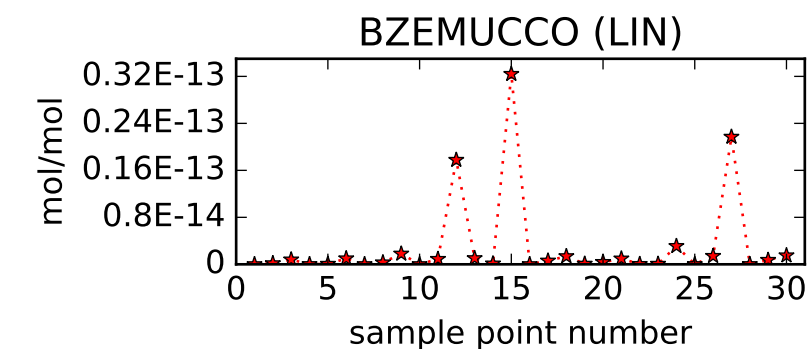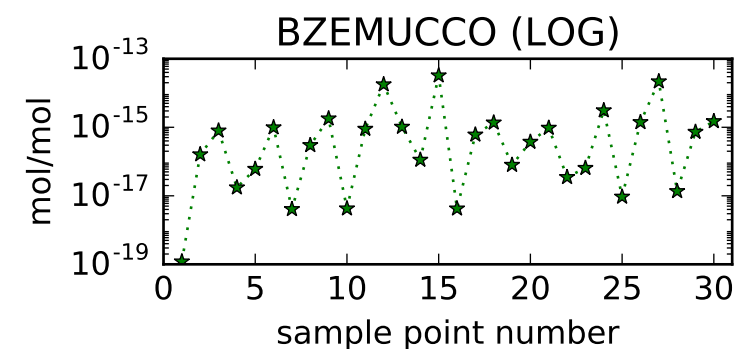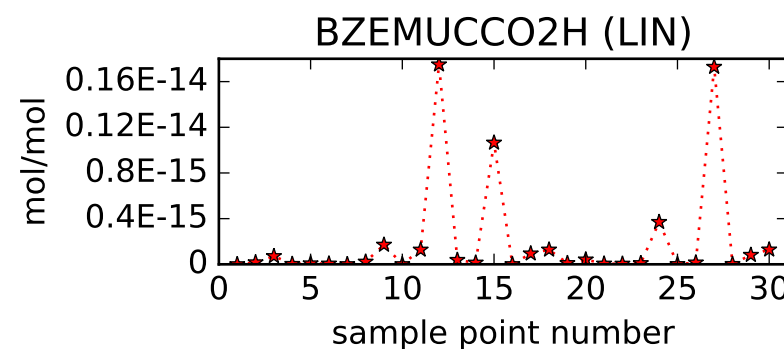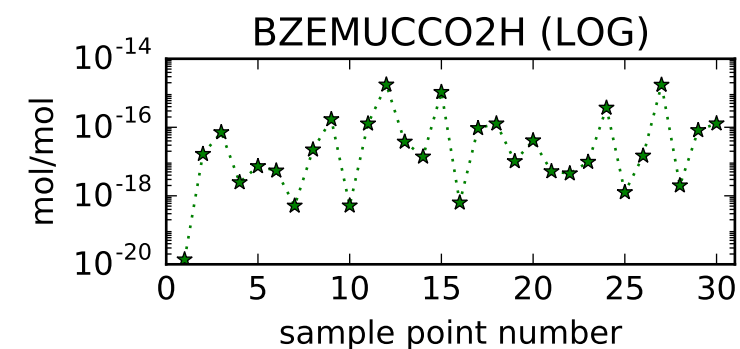

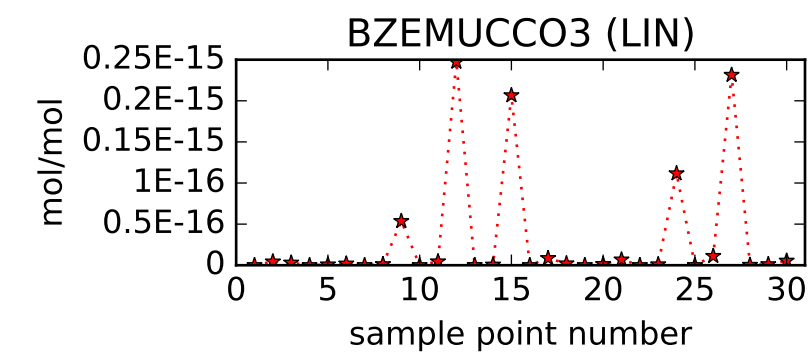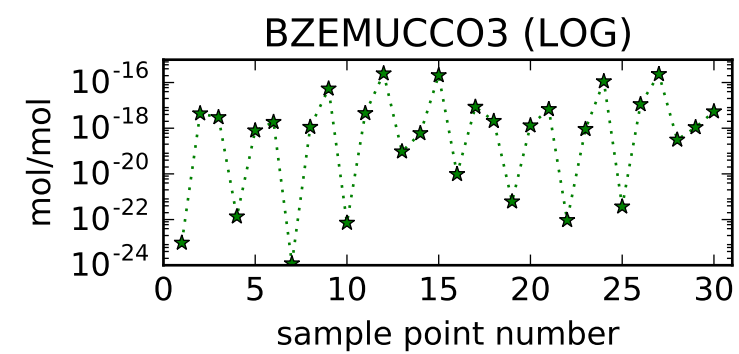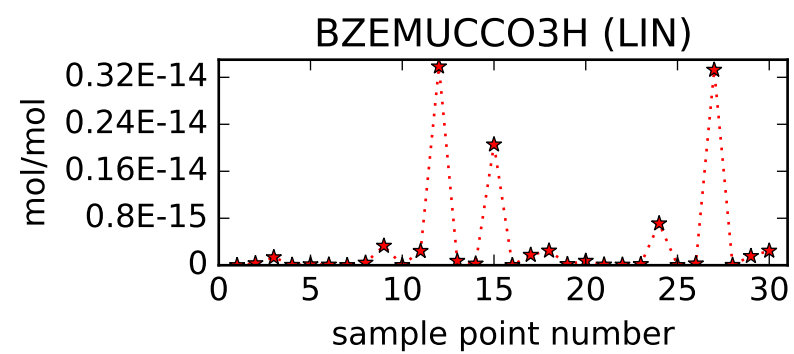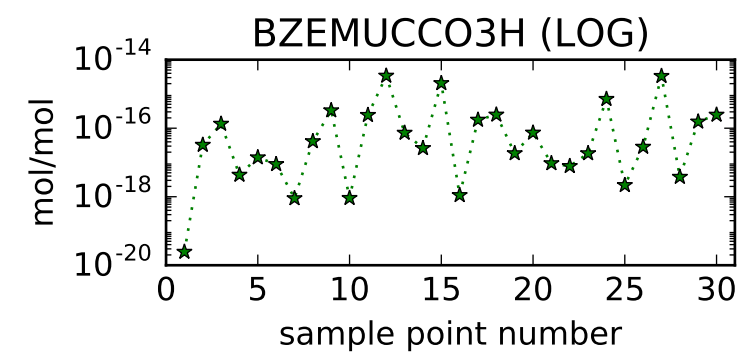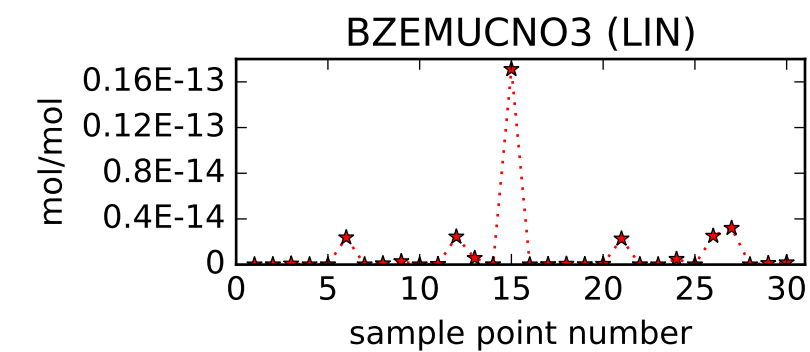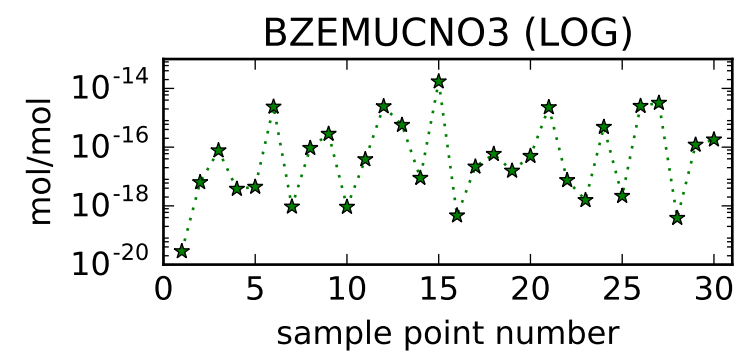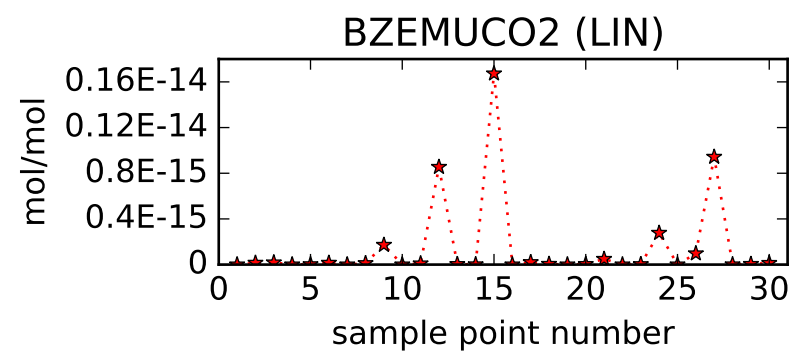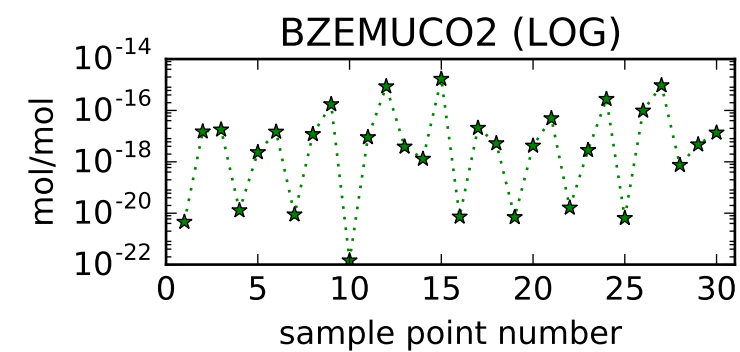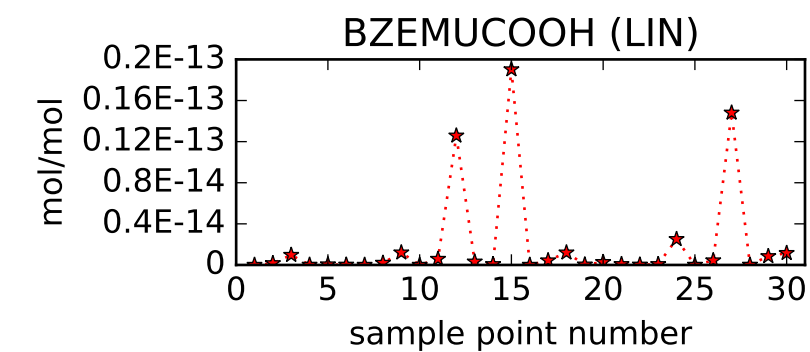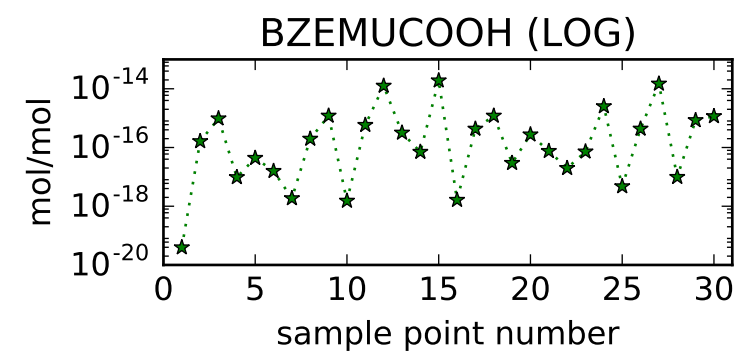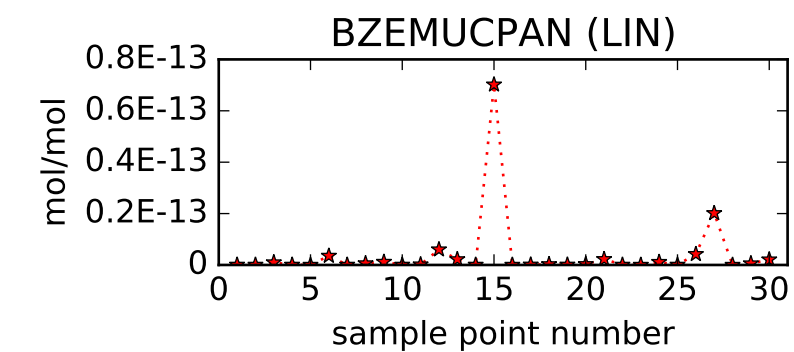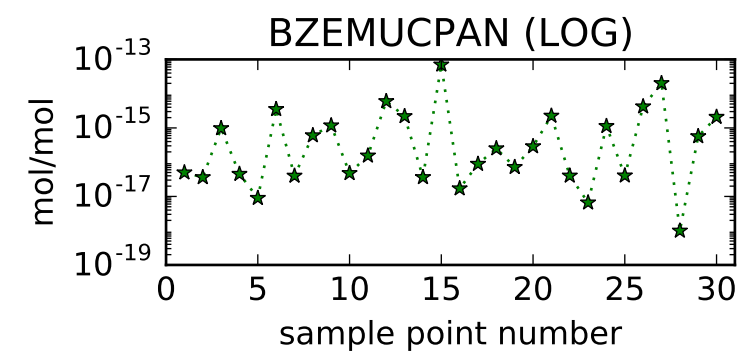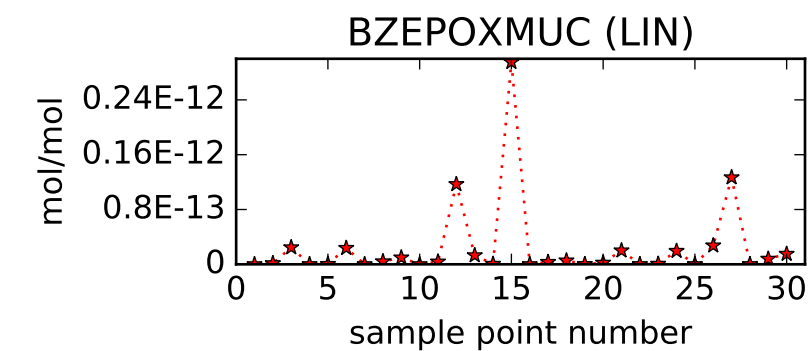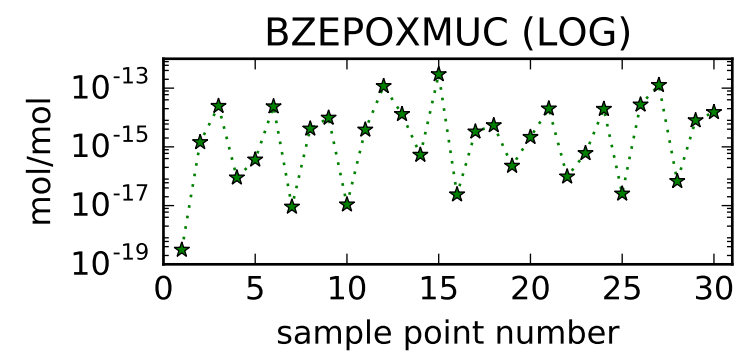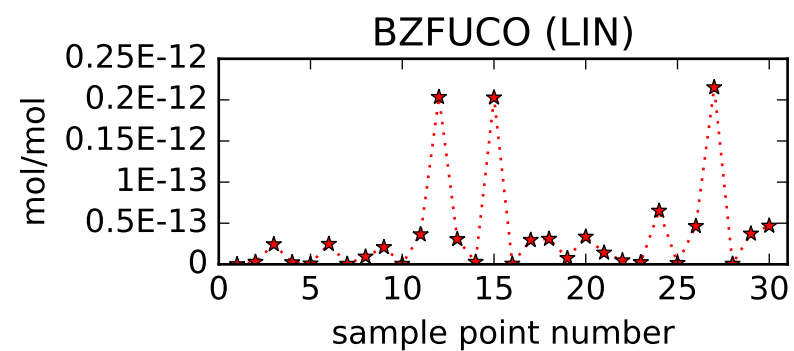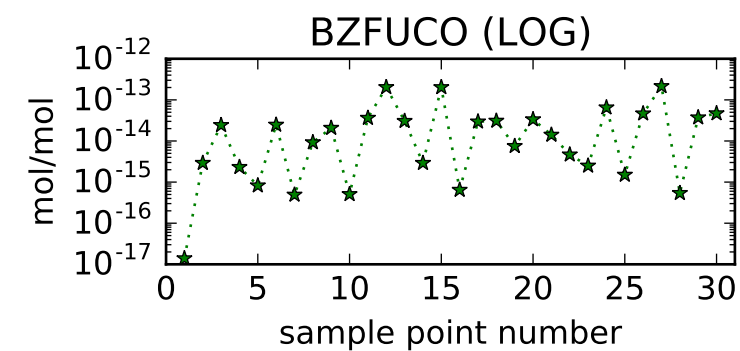

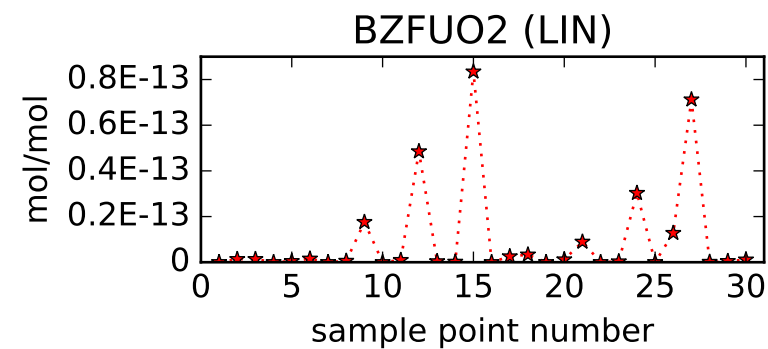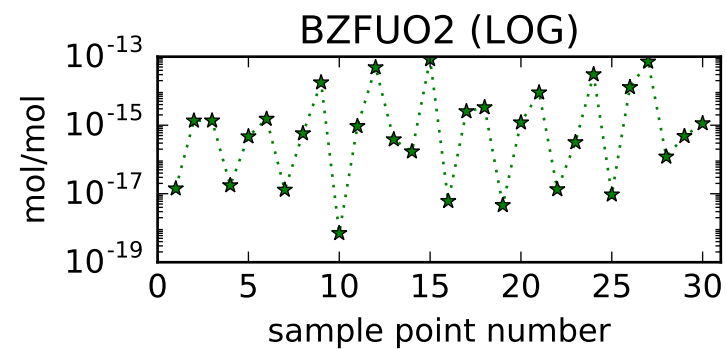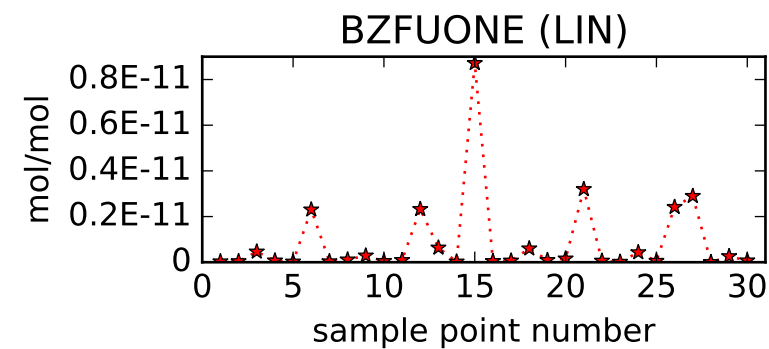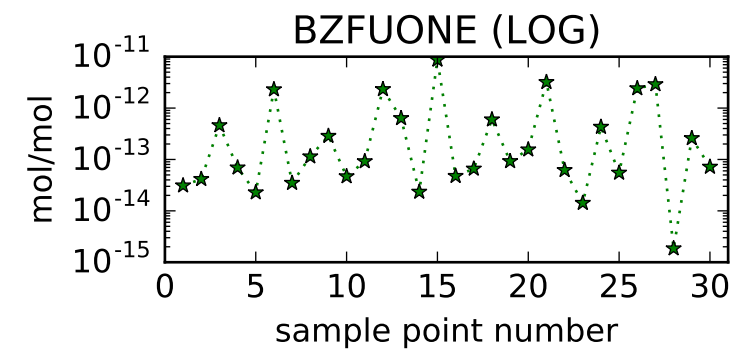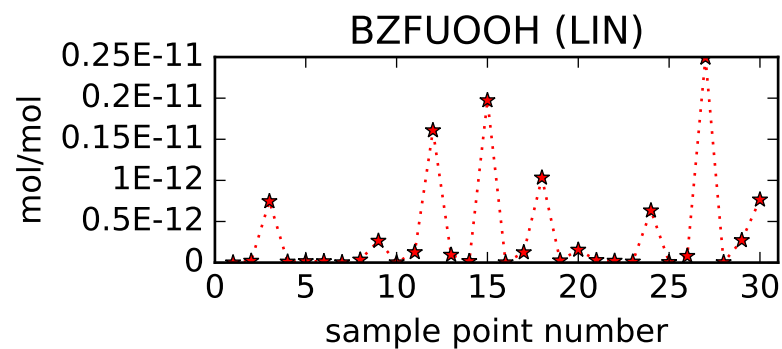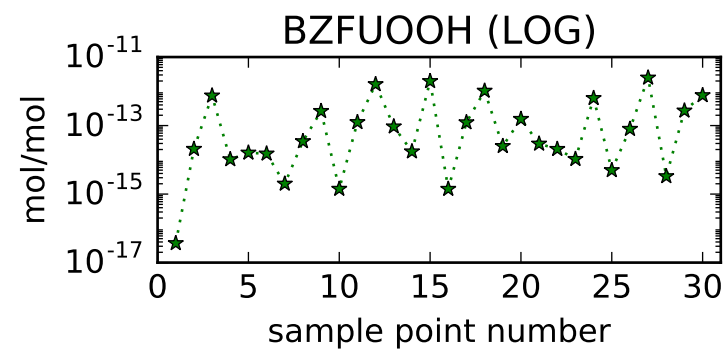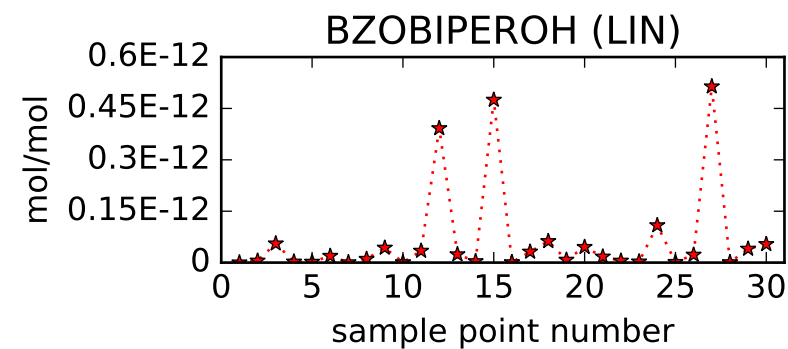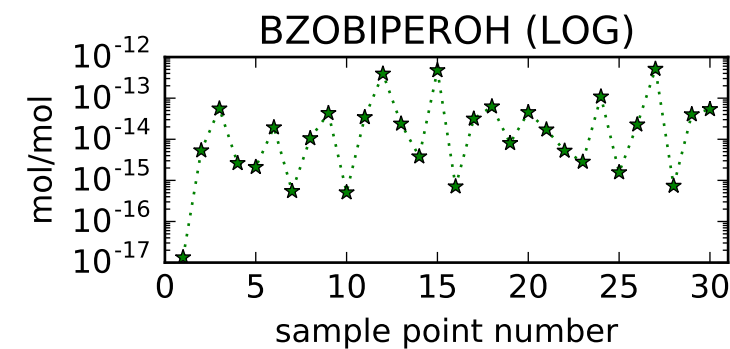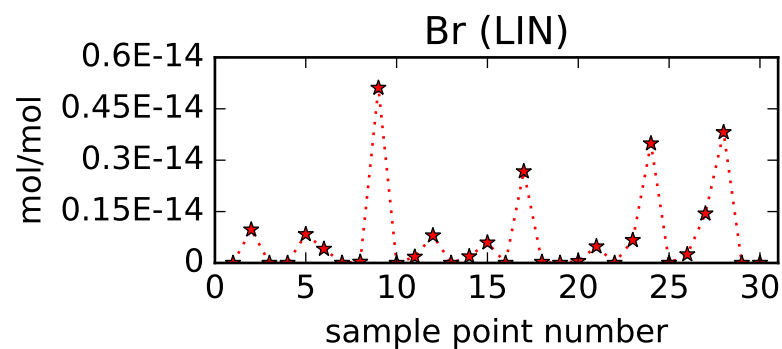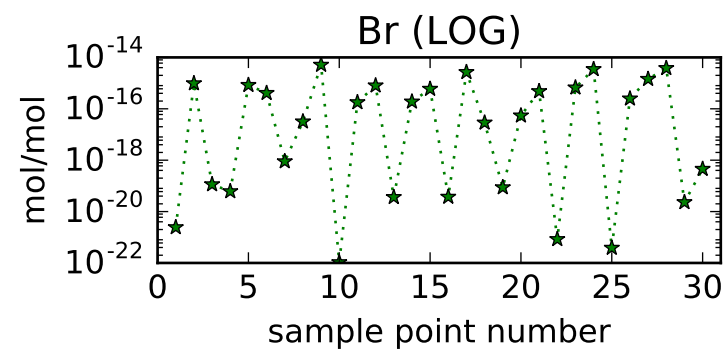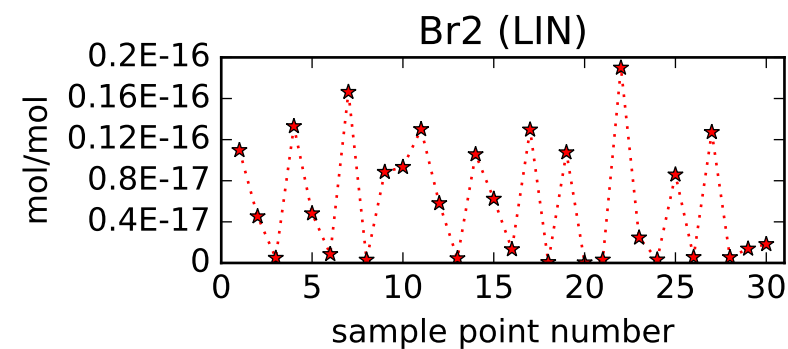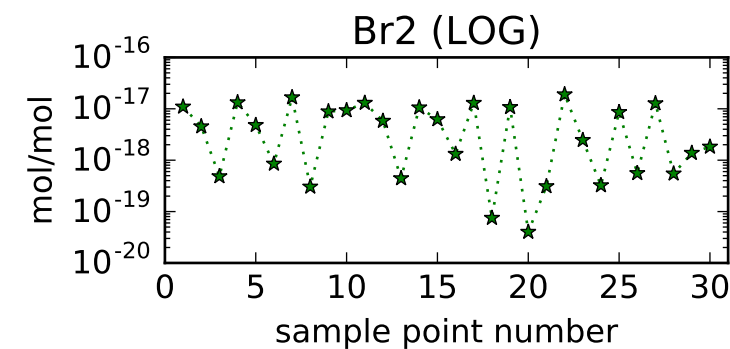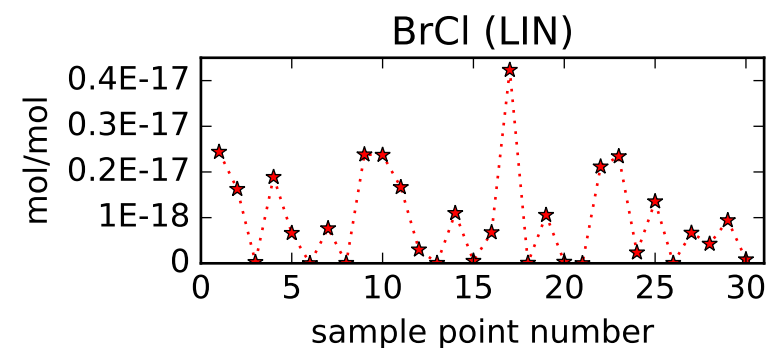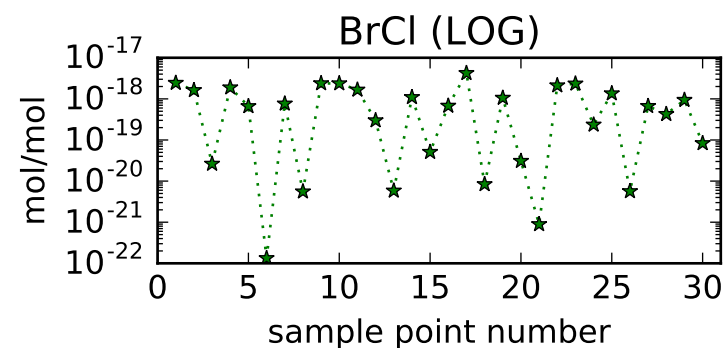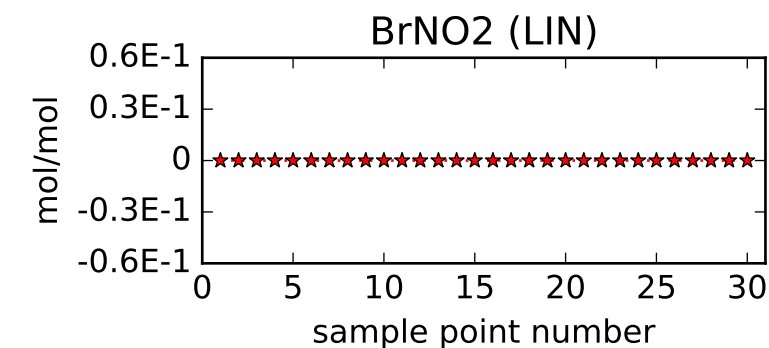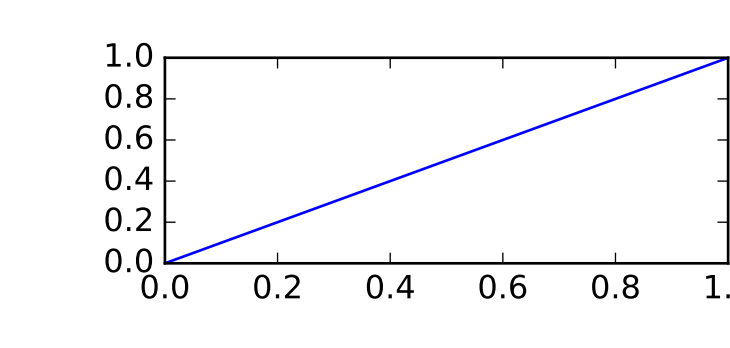

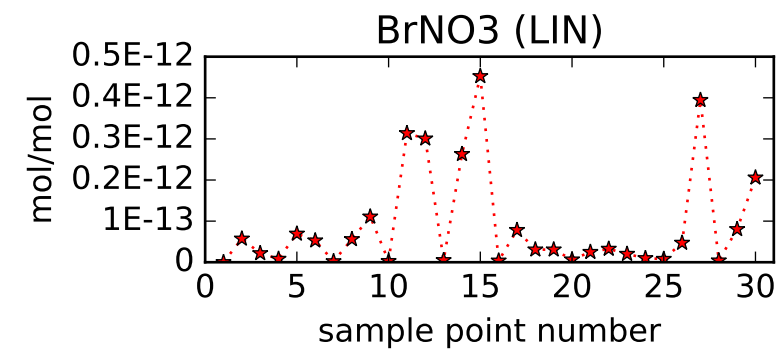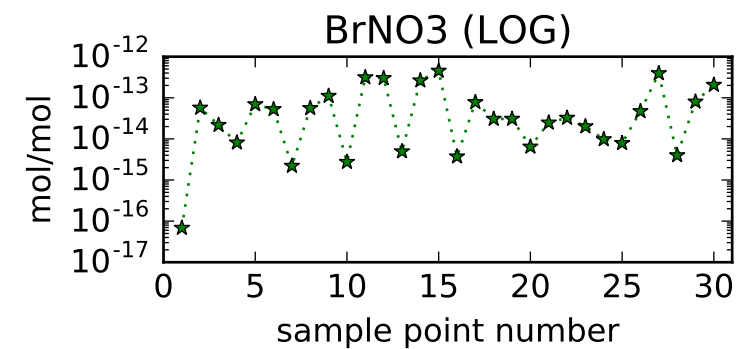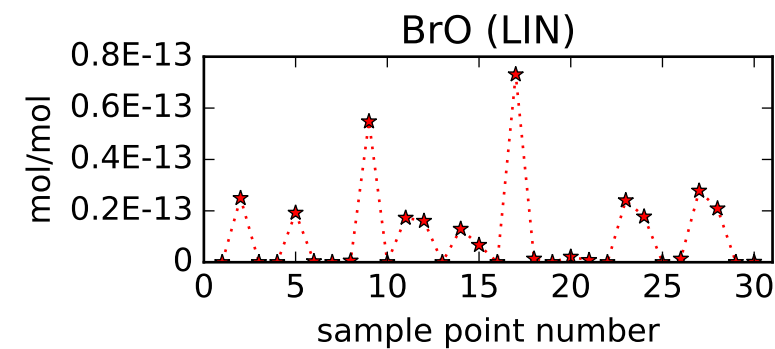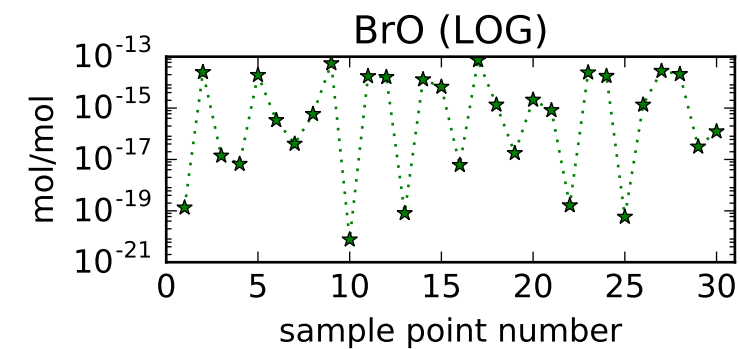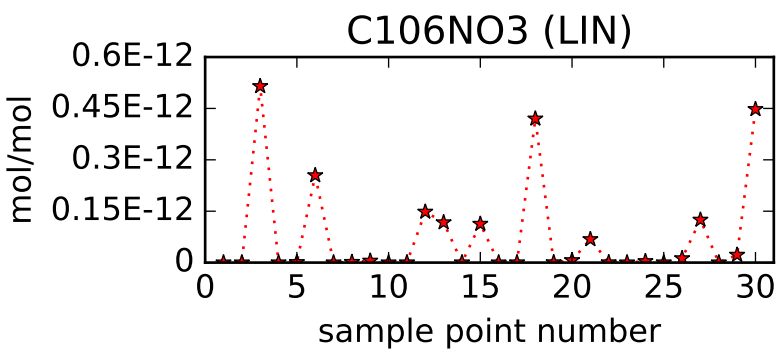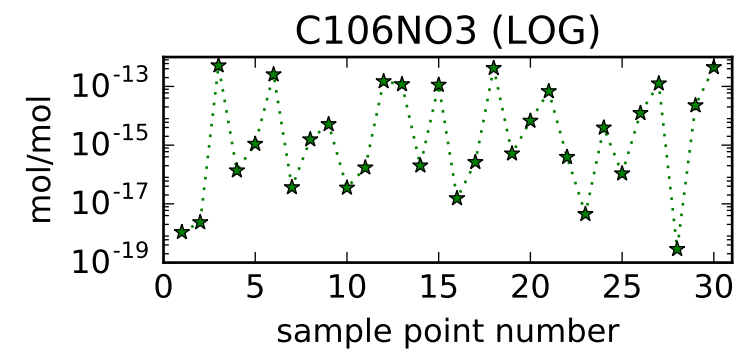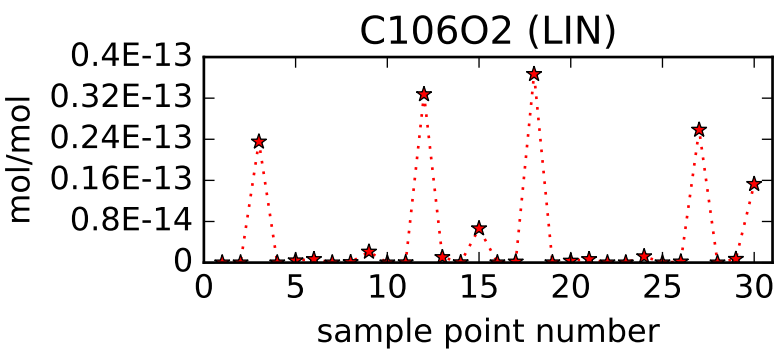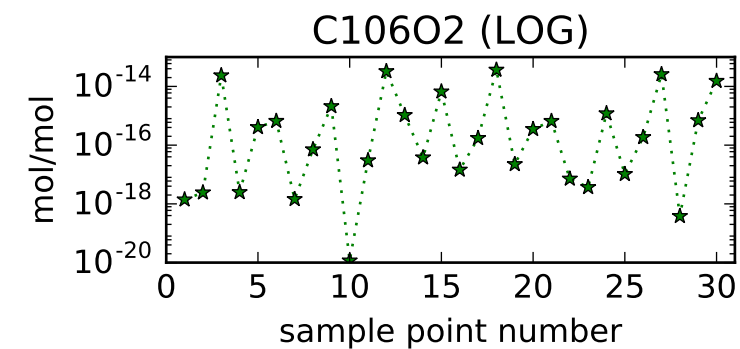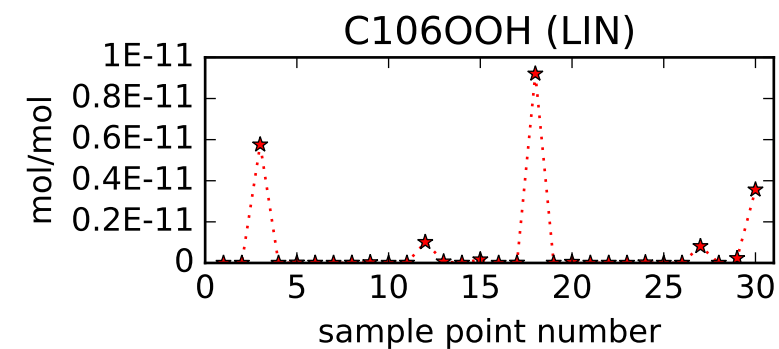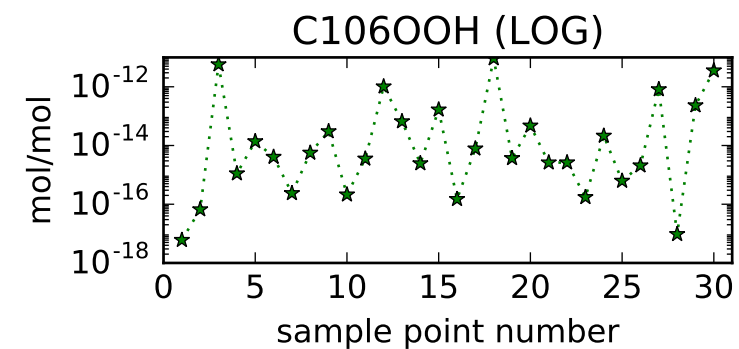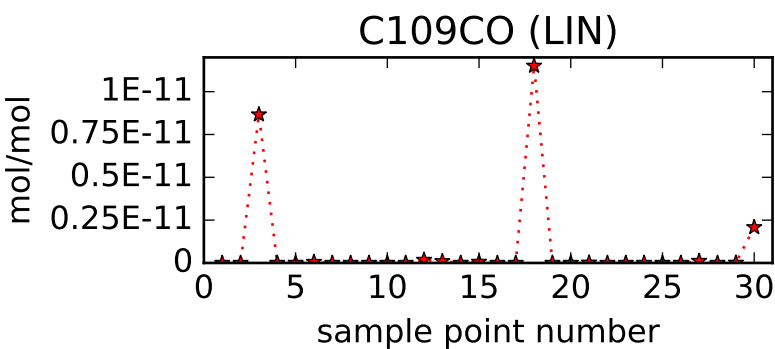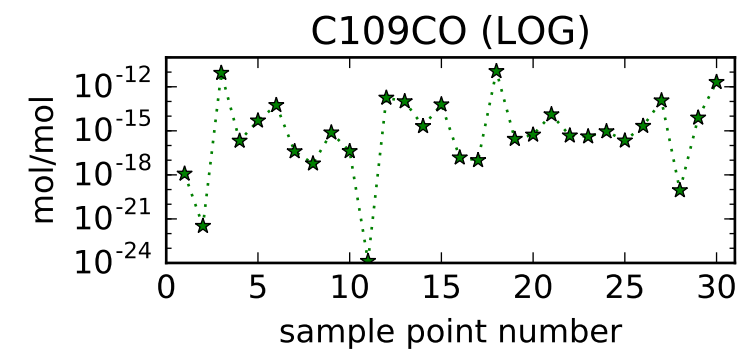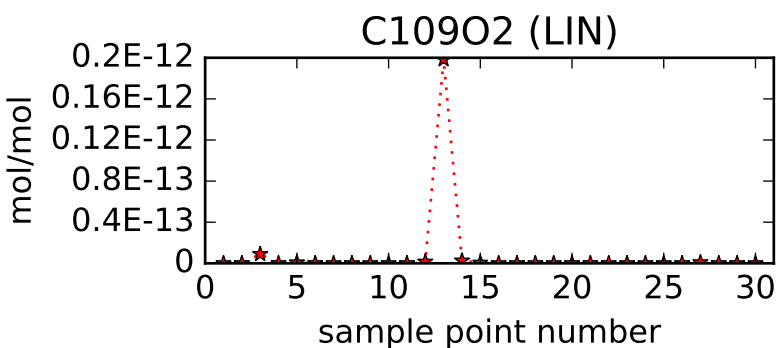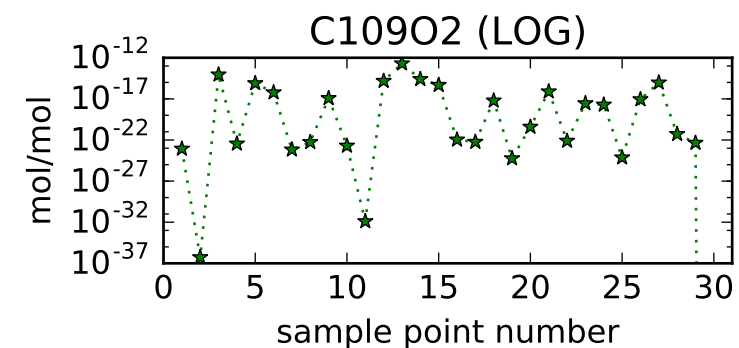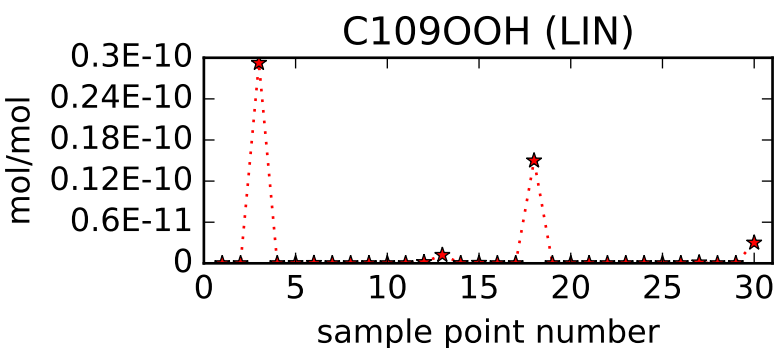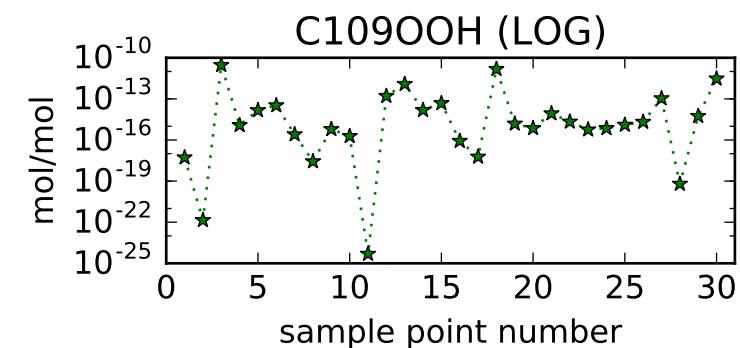

C10PAN2 (LIN)

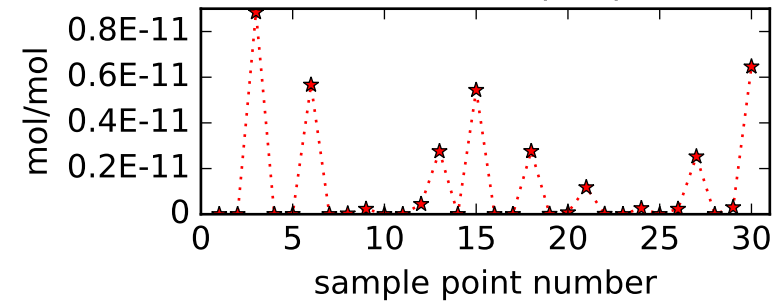

C10PAN2 (LOG)

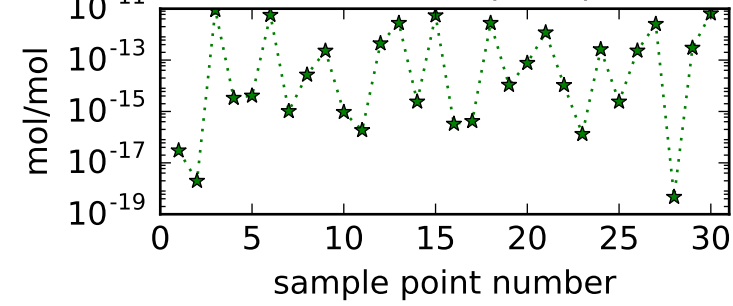

C10DC2O2C4OD (LIN)

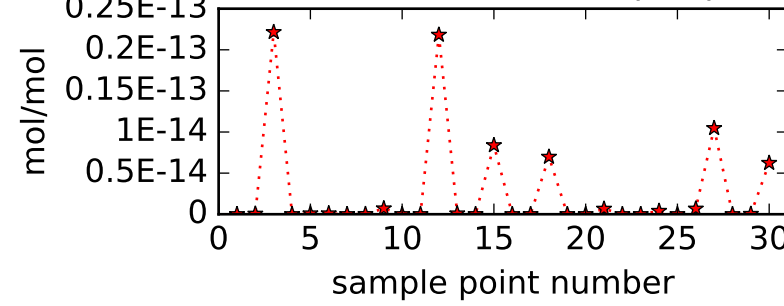

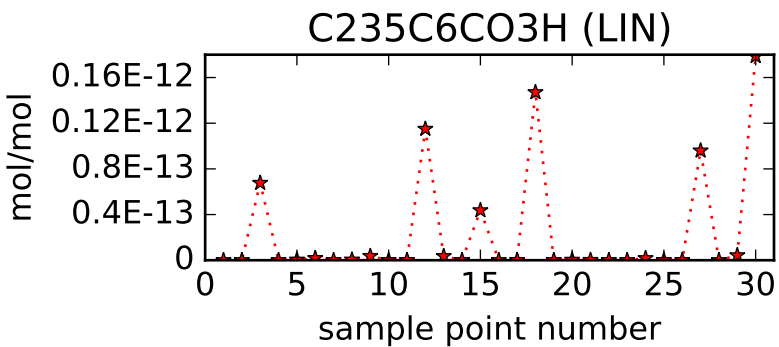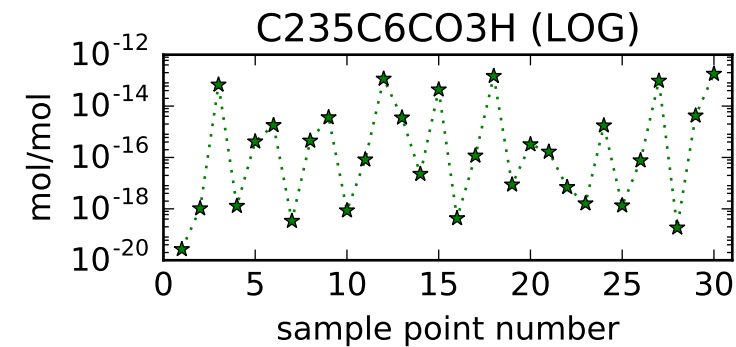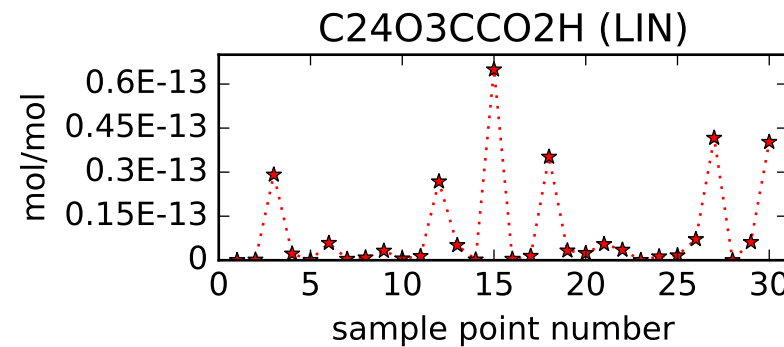

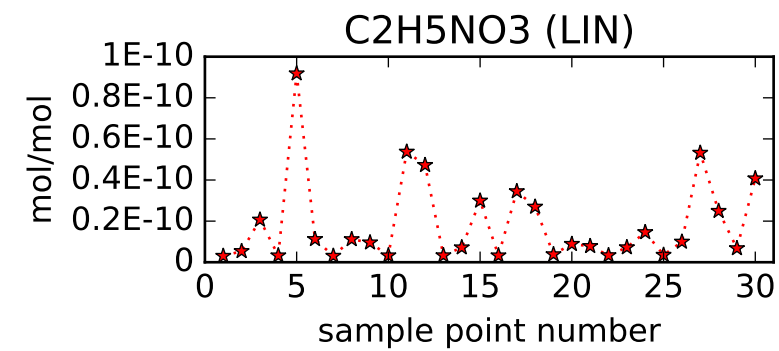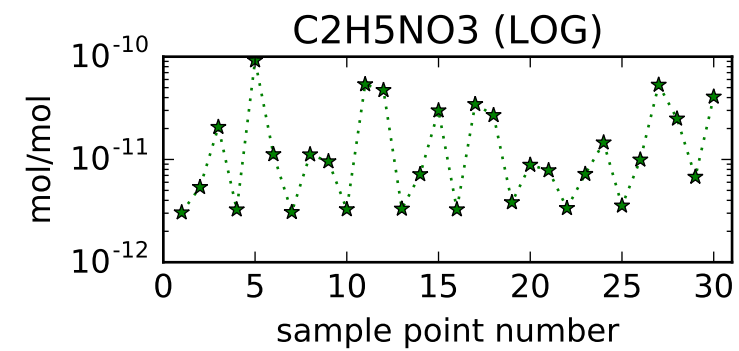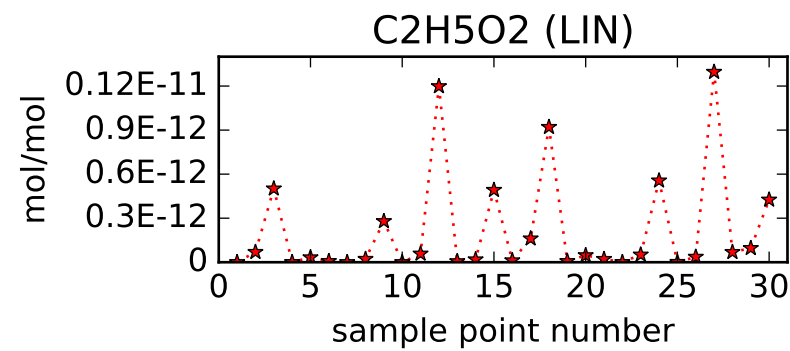

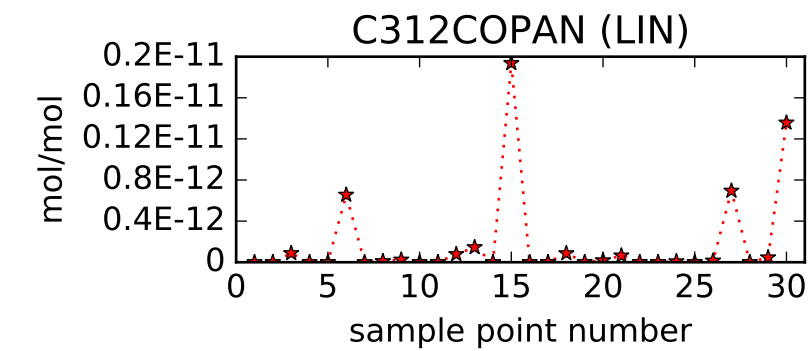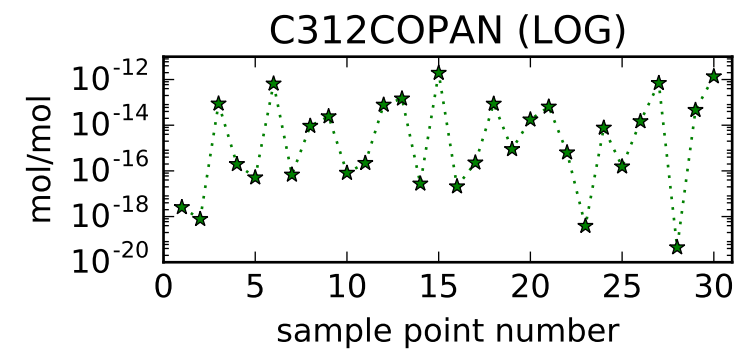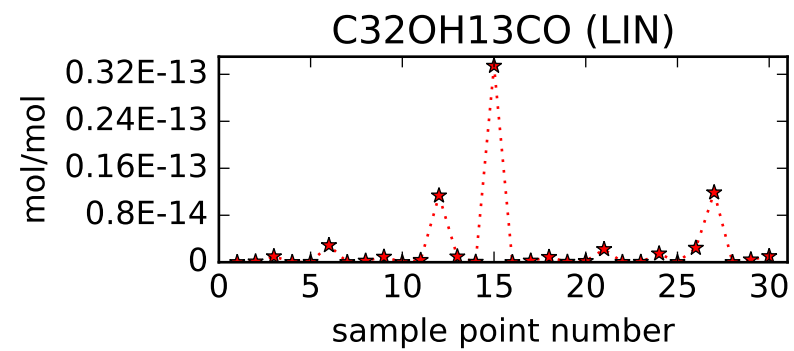

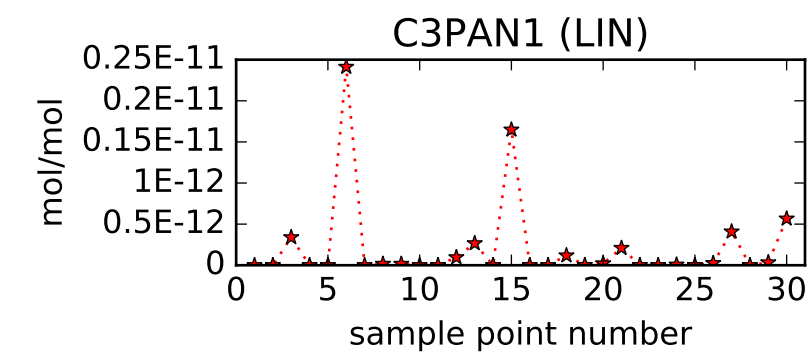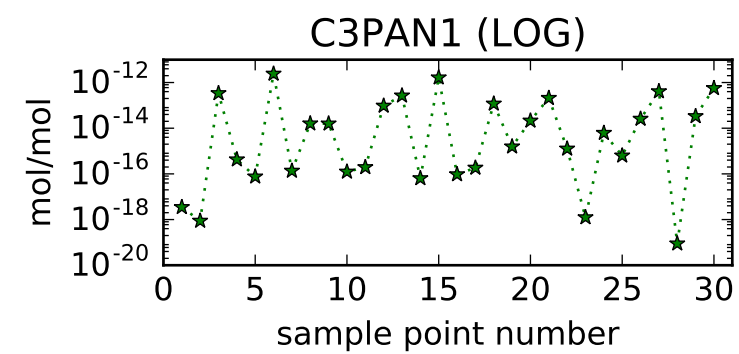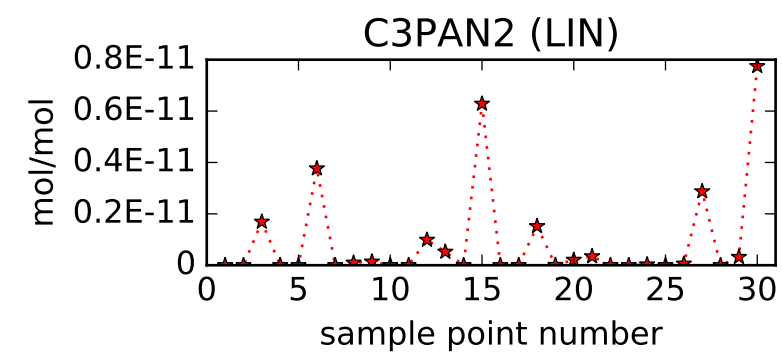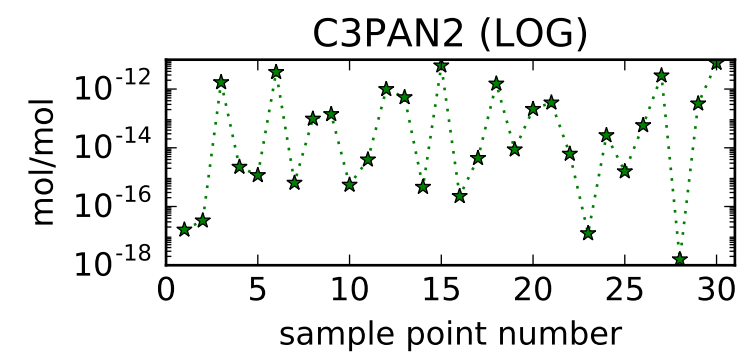

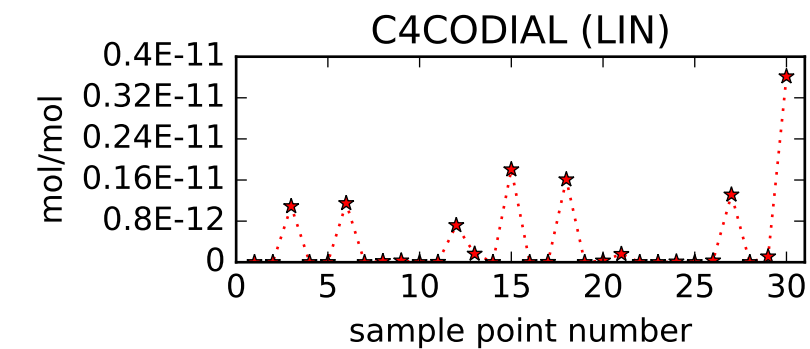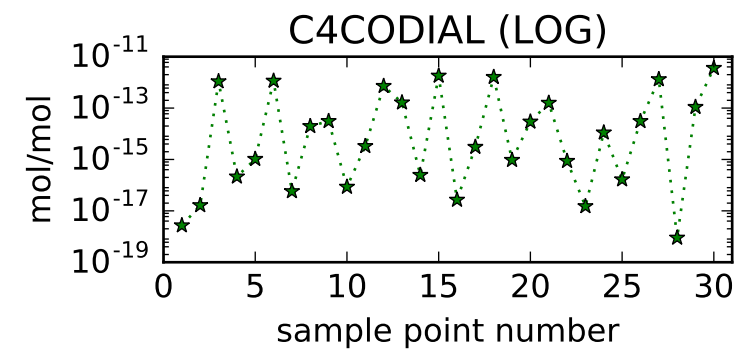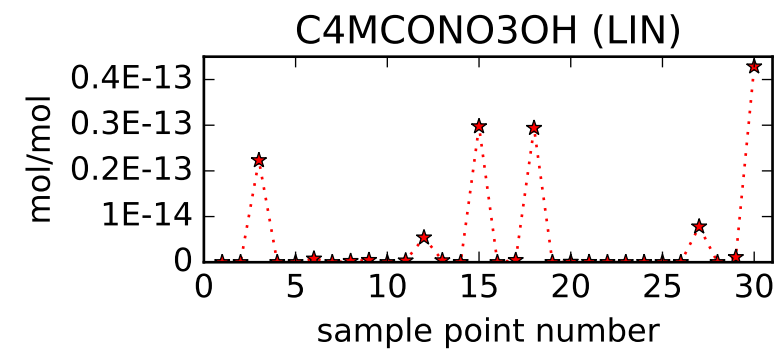

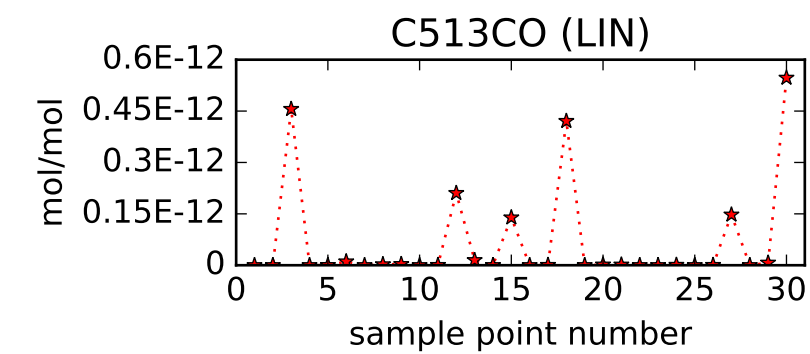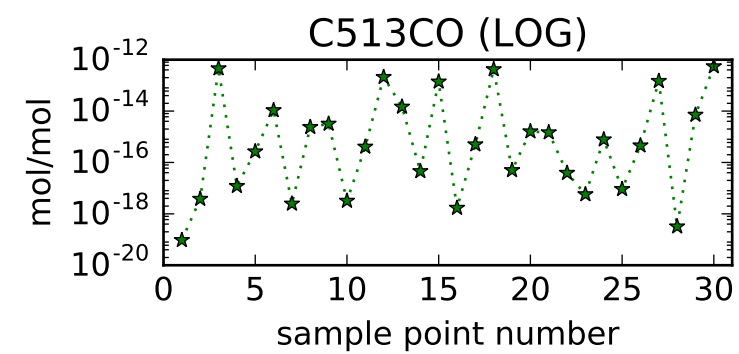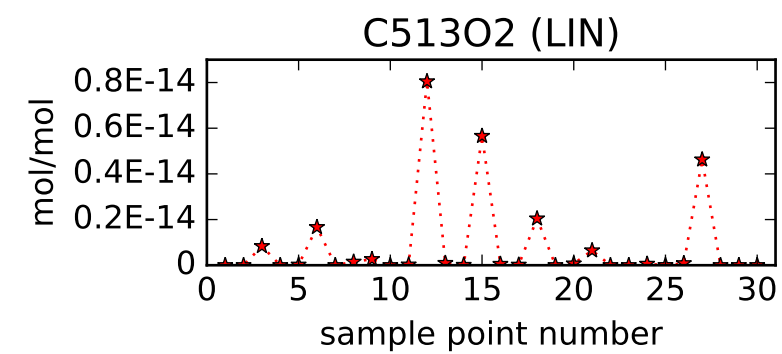

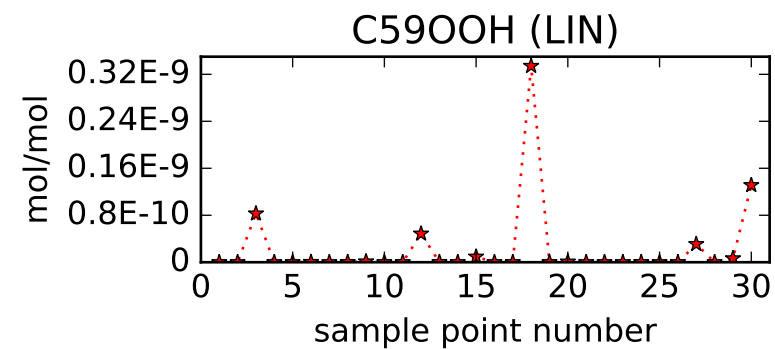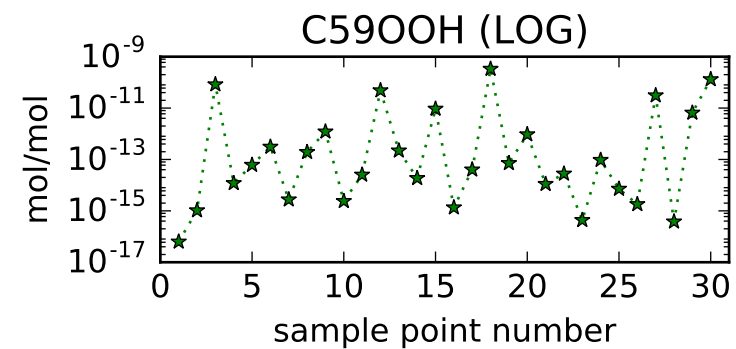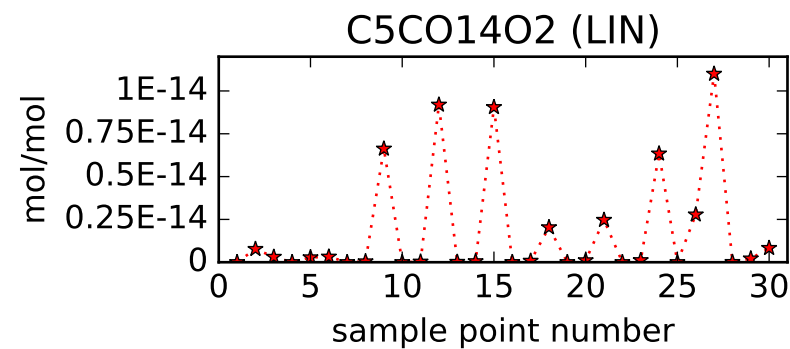

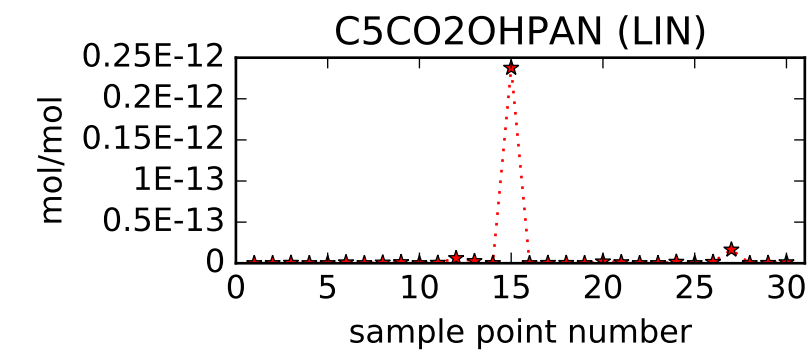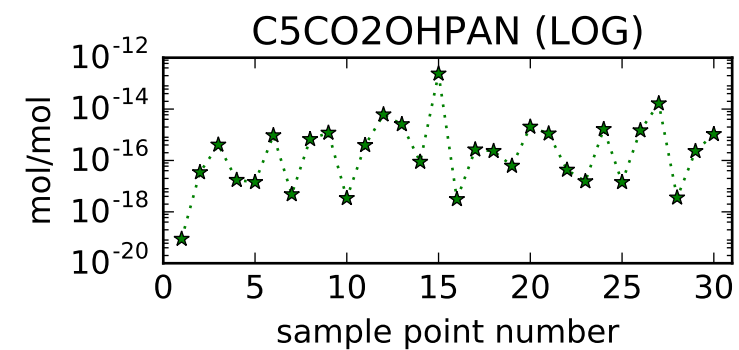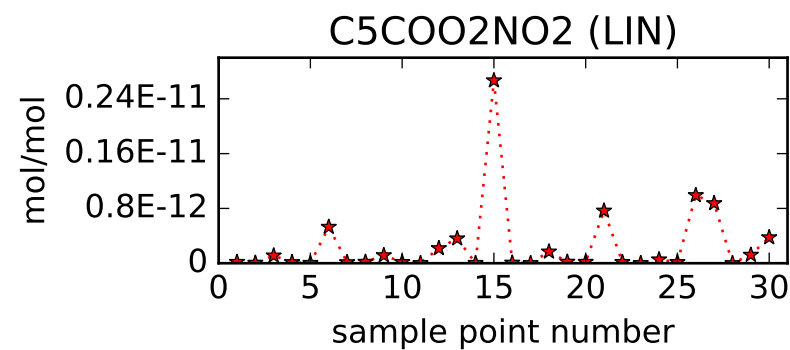

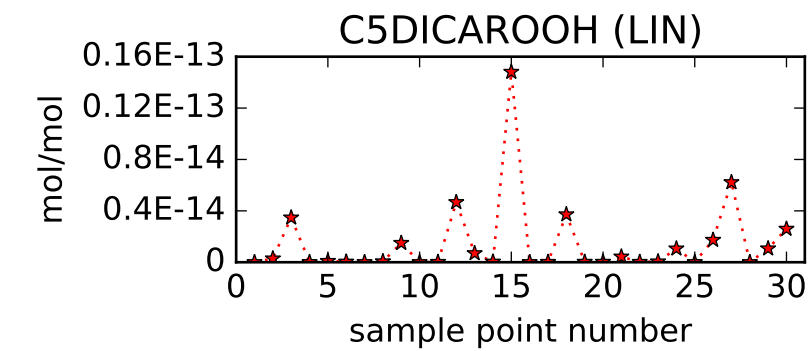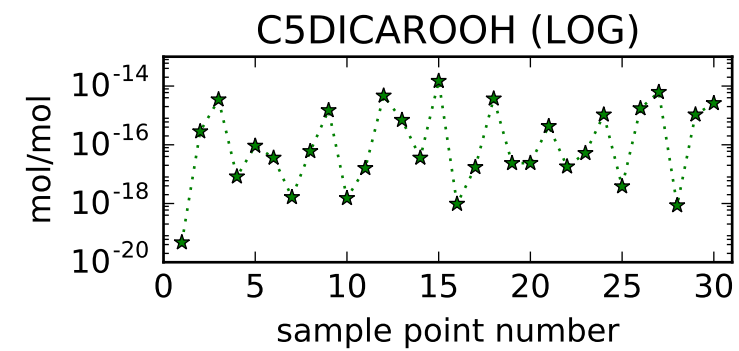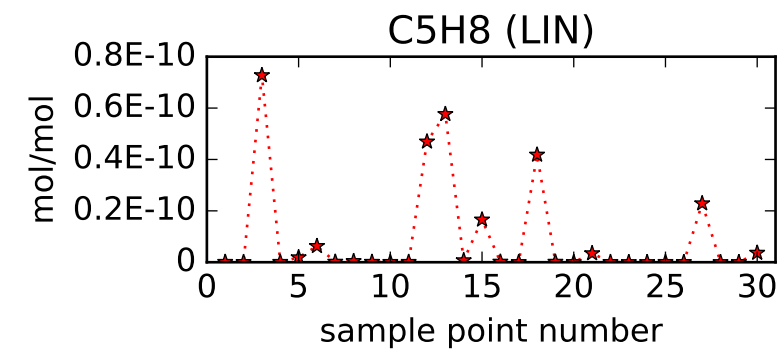

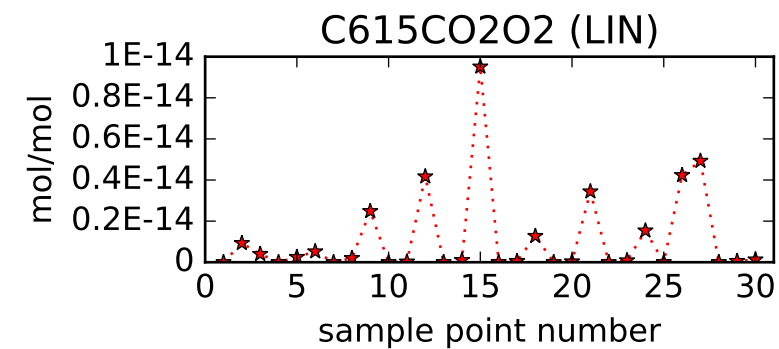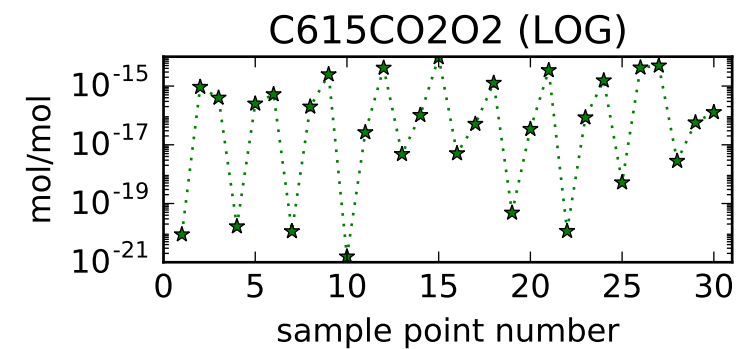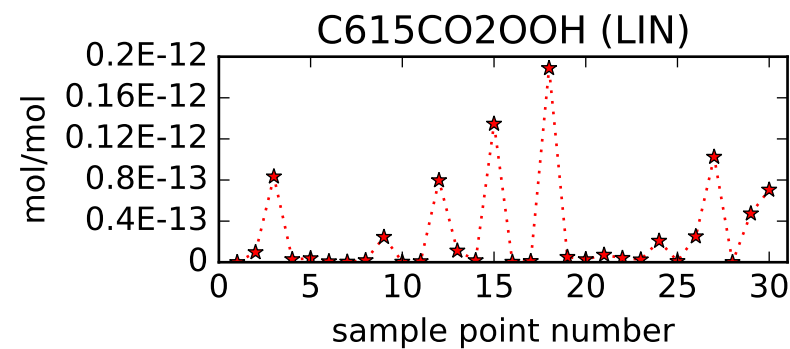

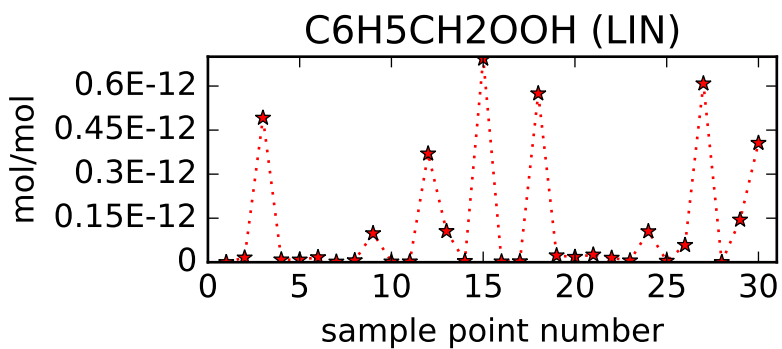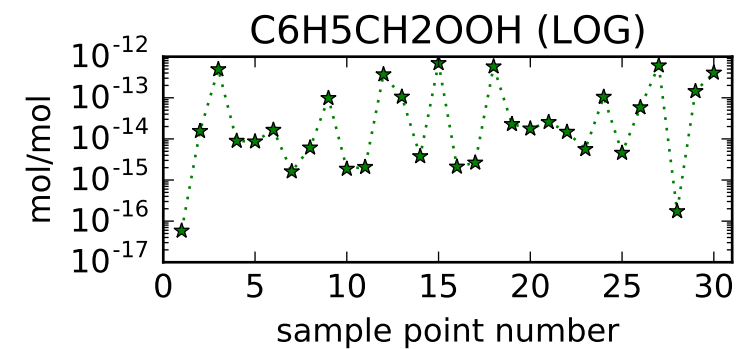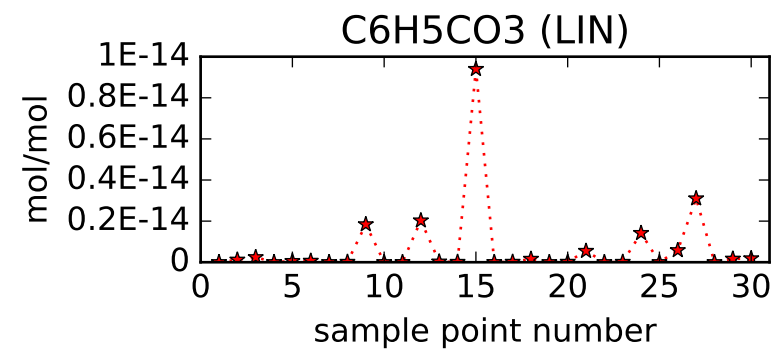

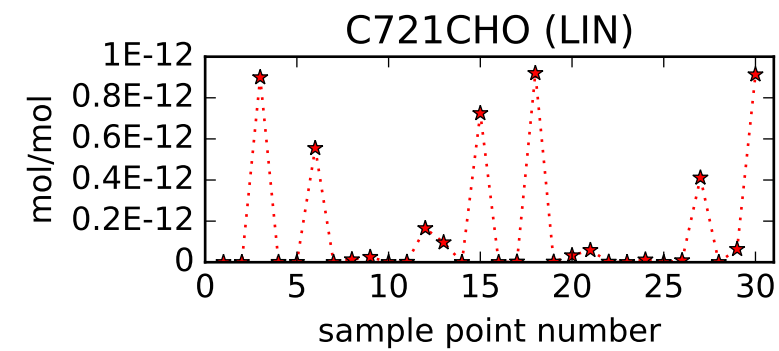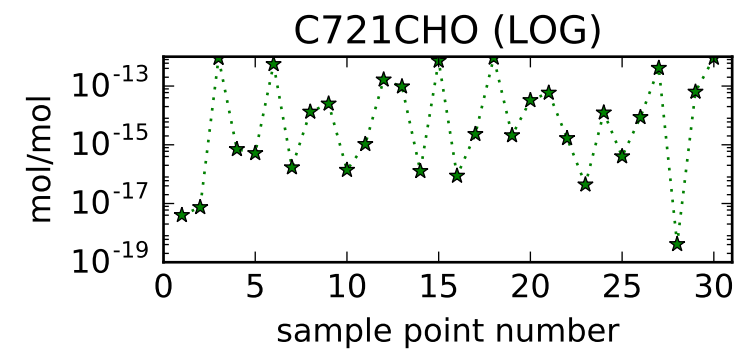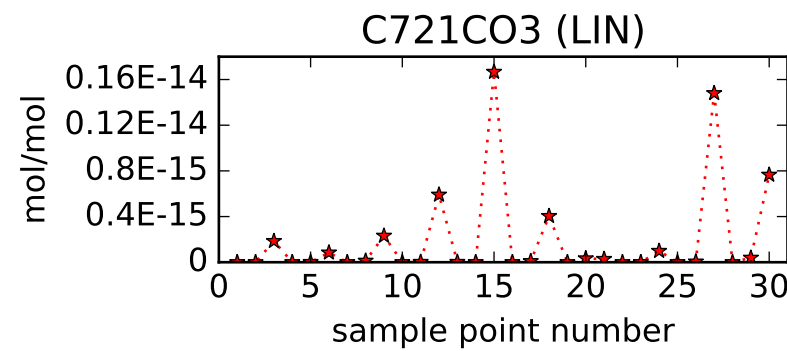

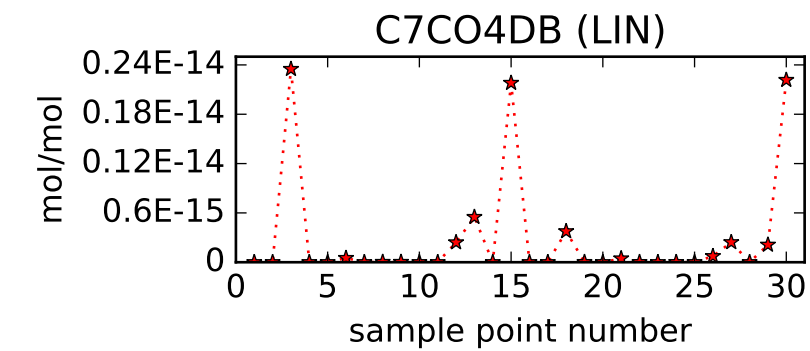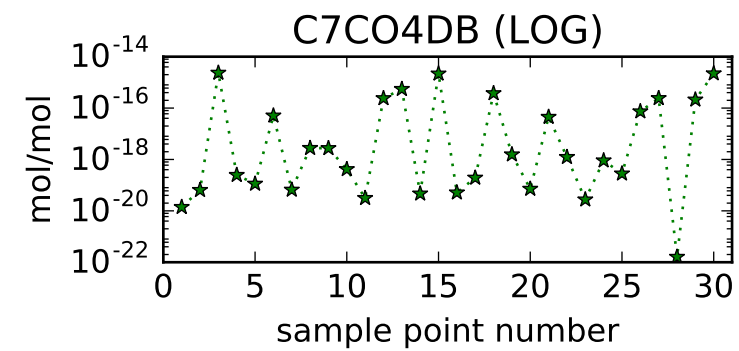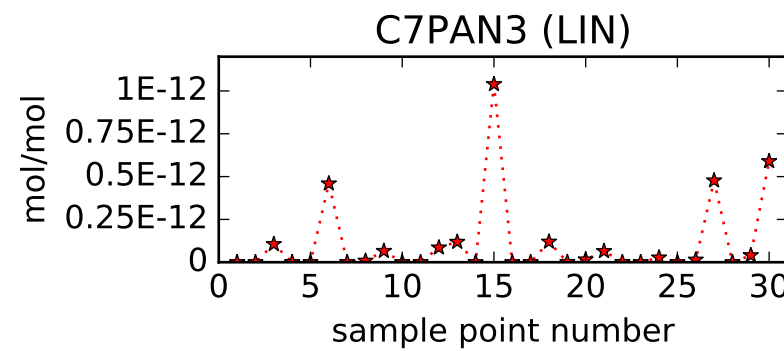

C811PAN (LIN)

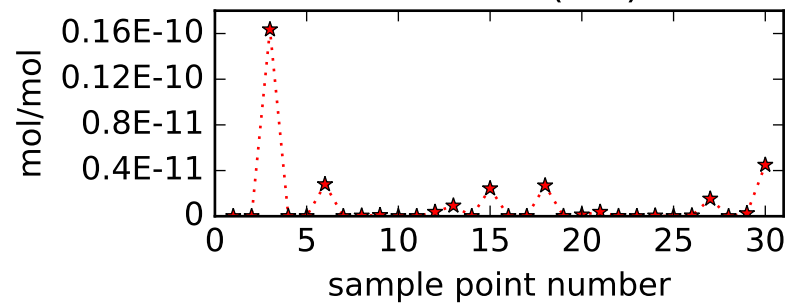

C811PAN (LOG)

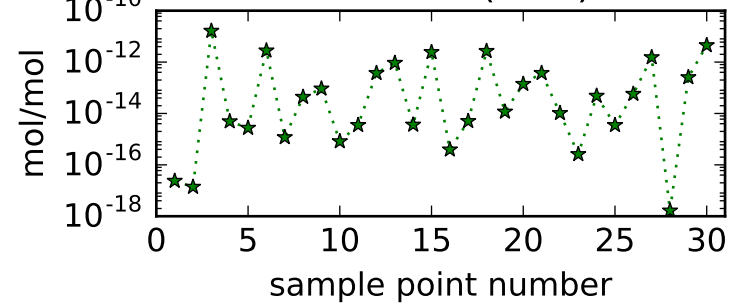

C812O2 (LIN)

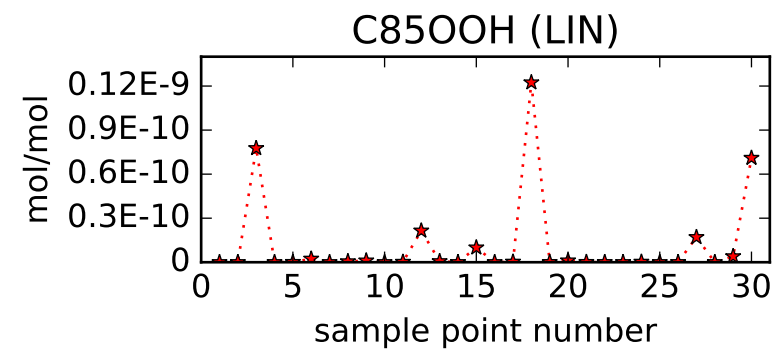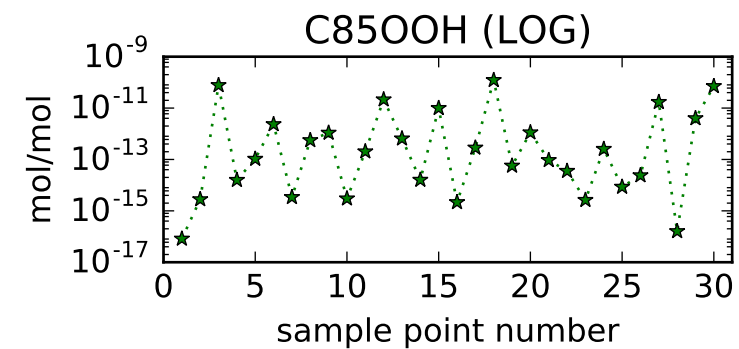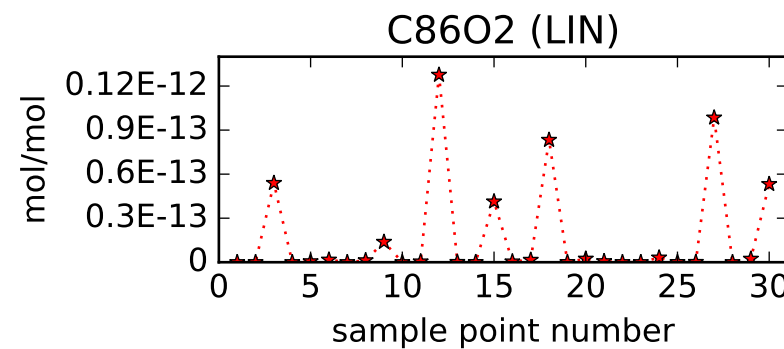

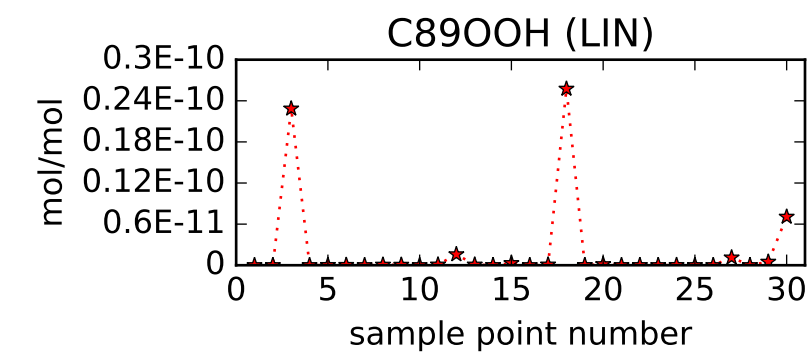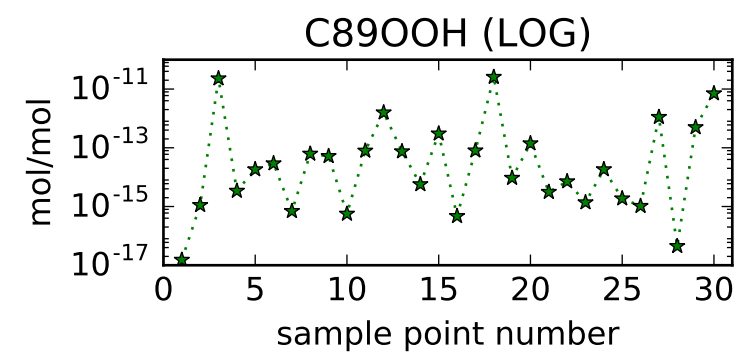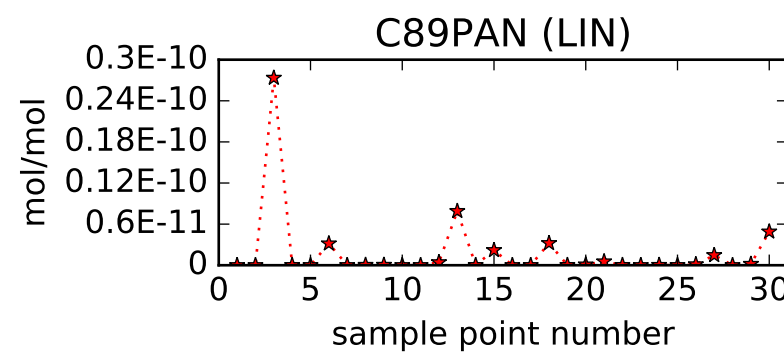

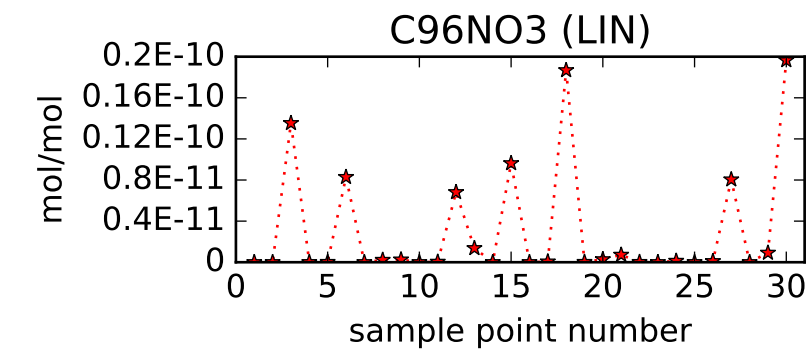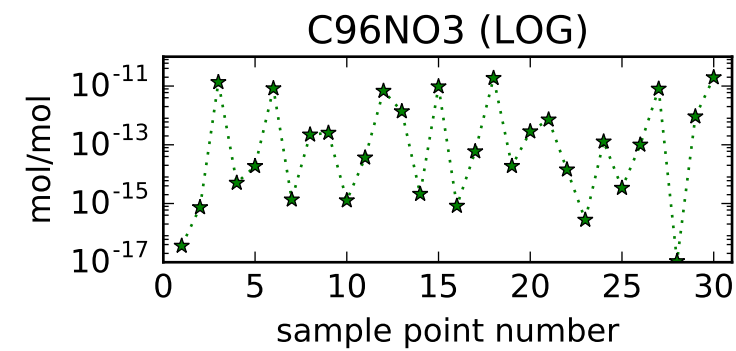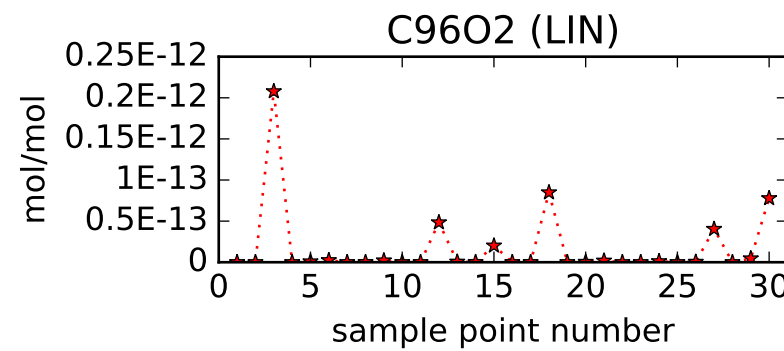

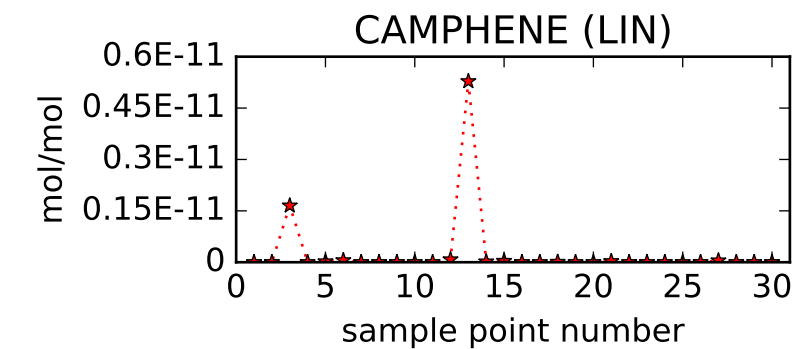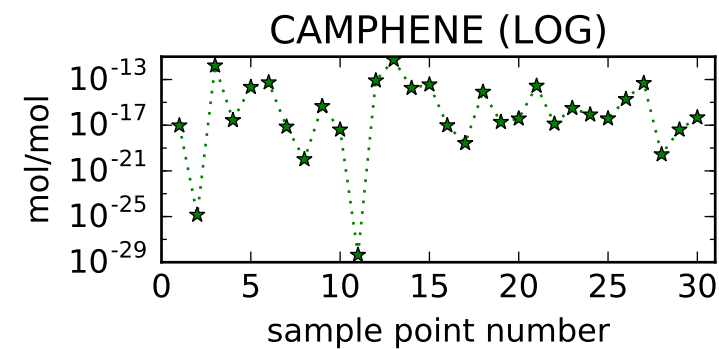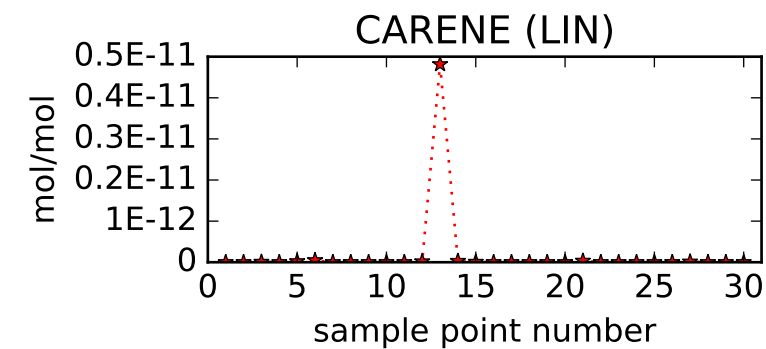

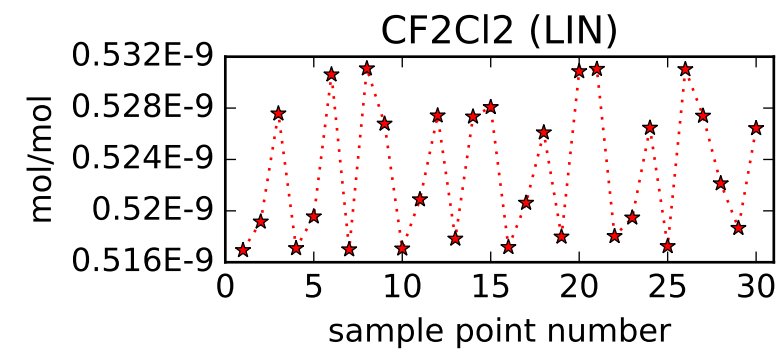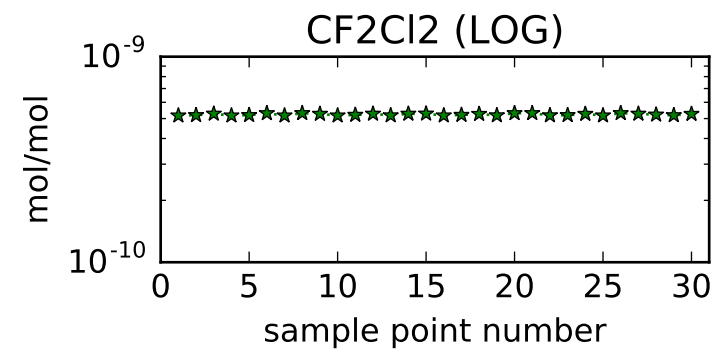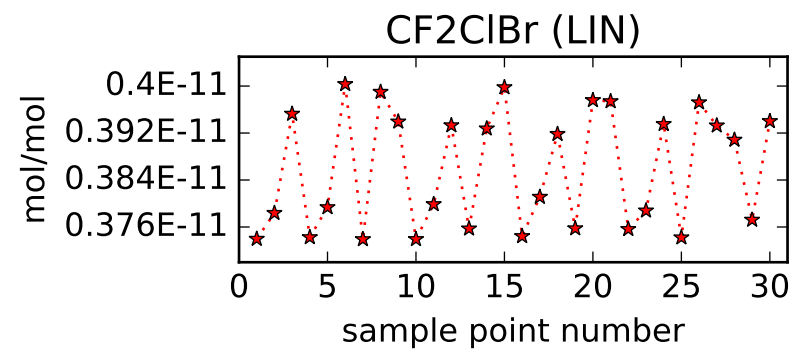

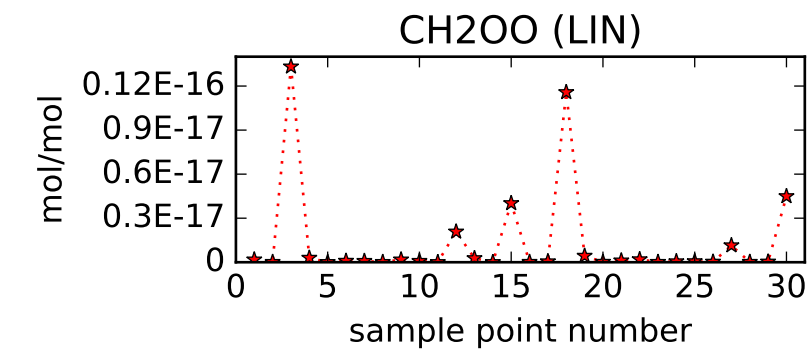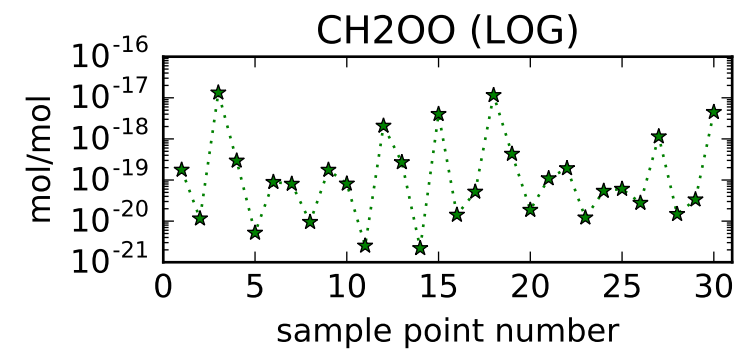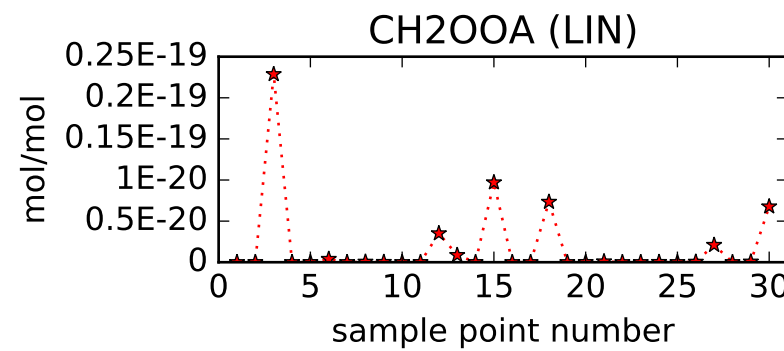

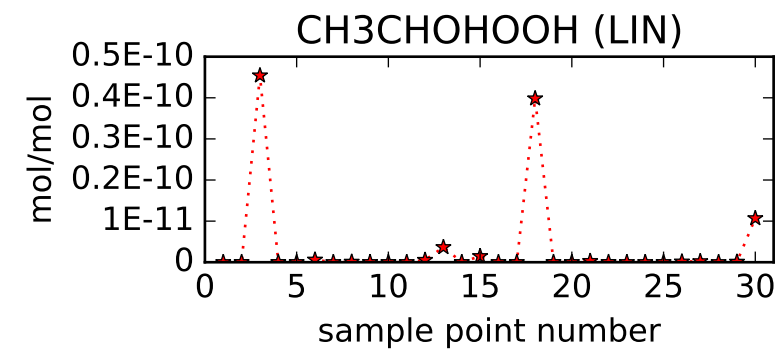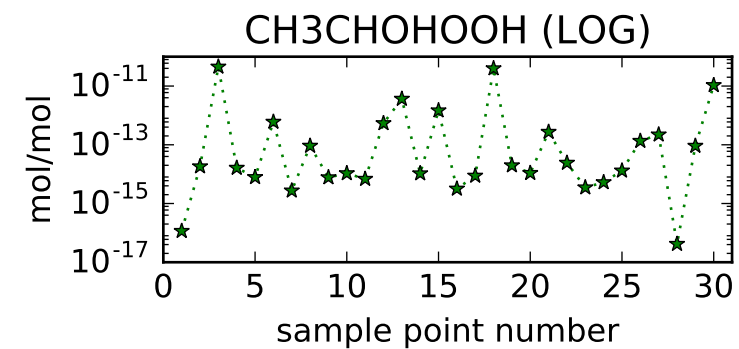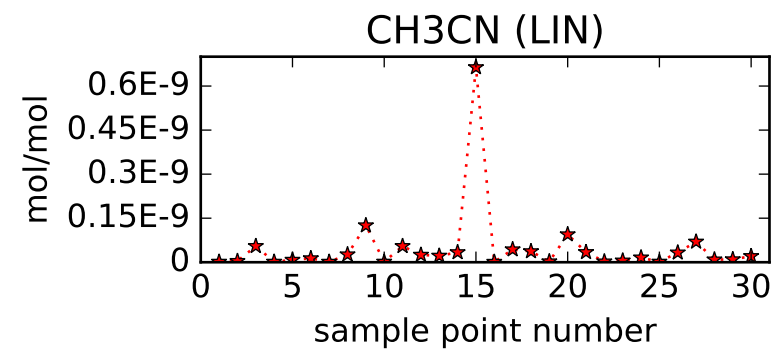

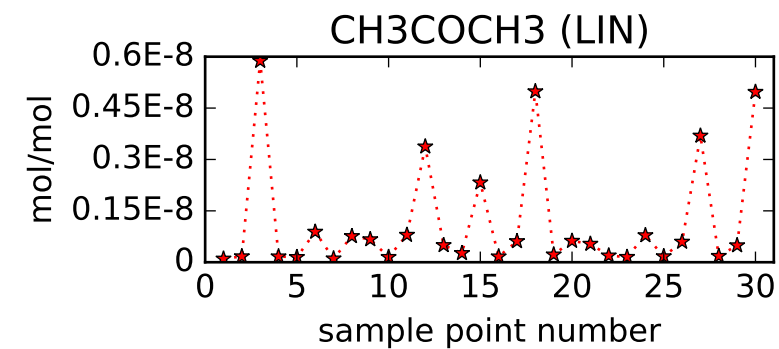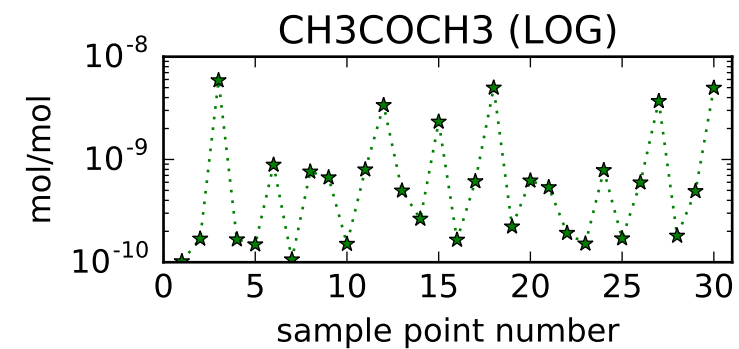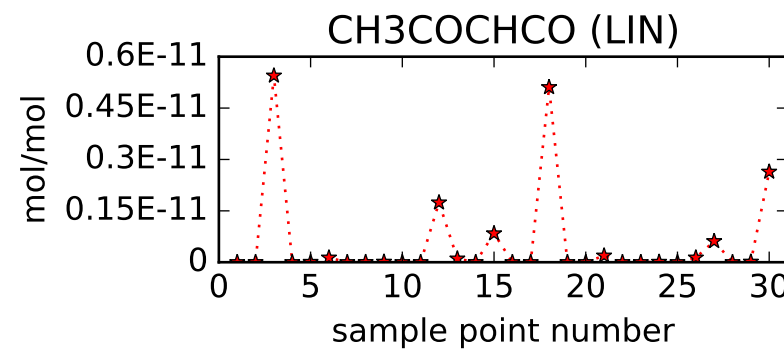

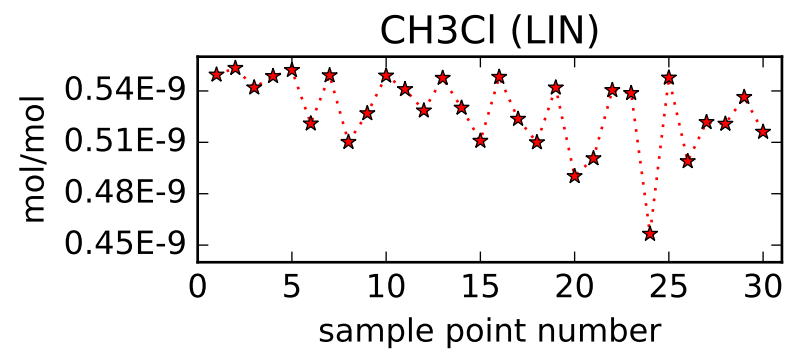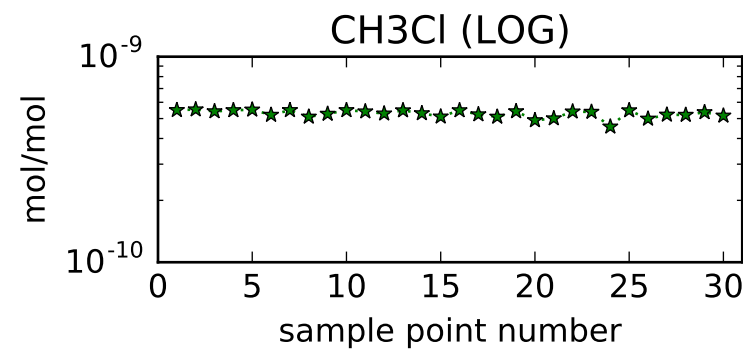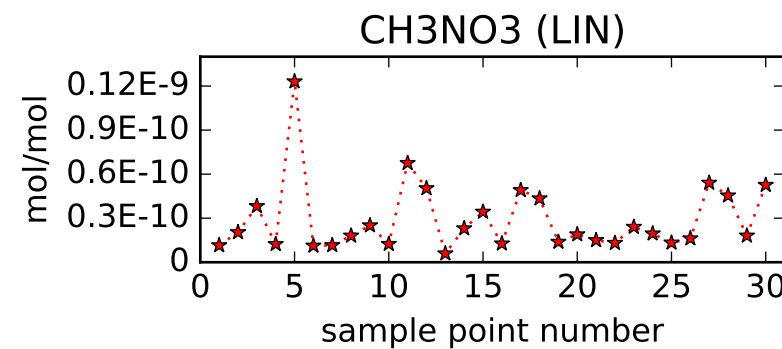

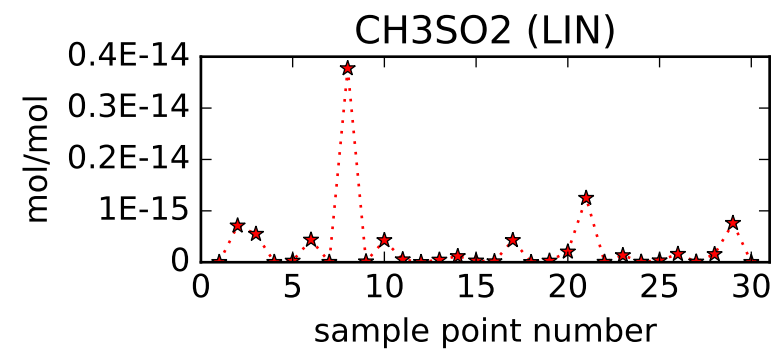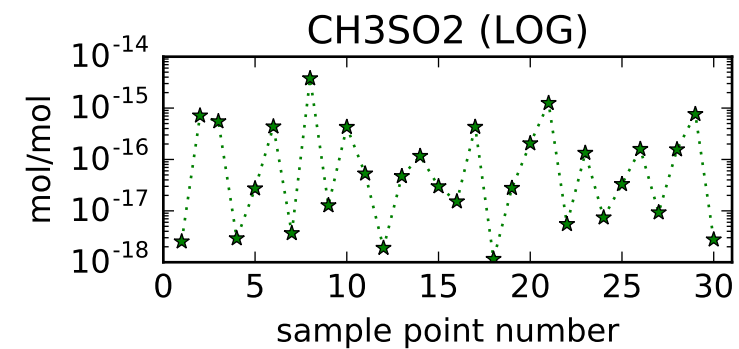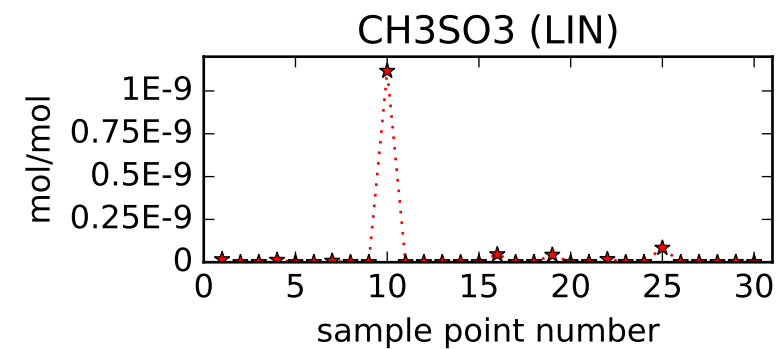

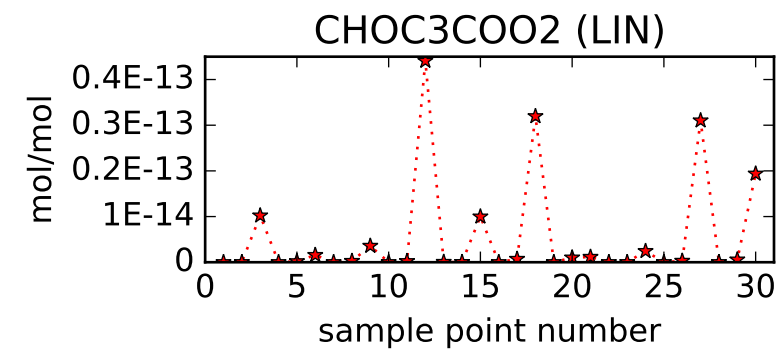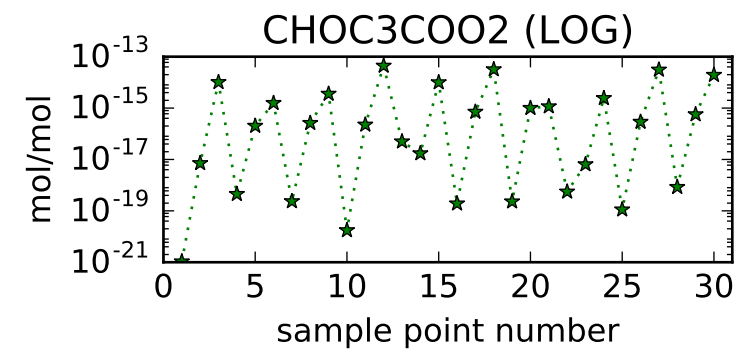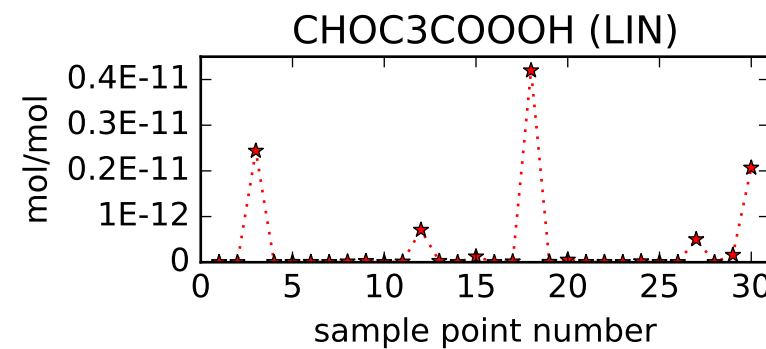

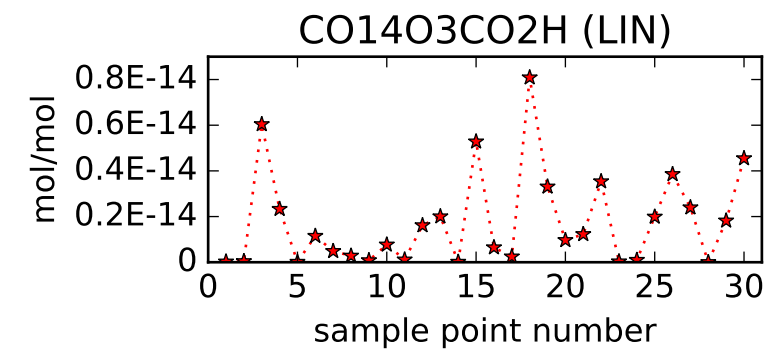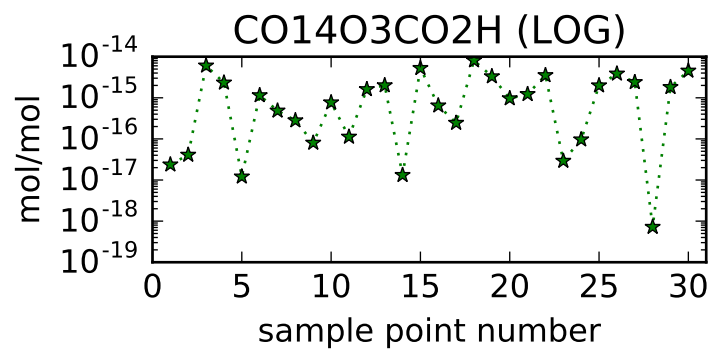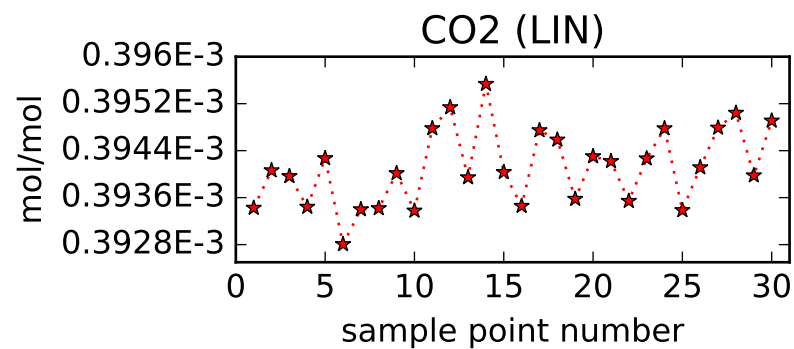

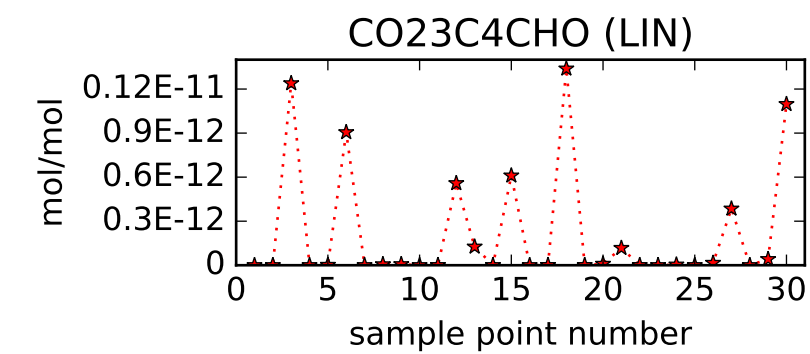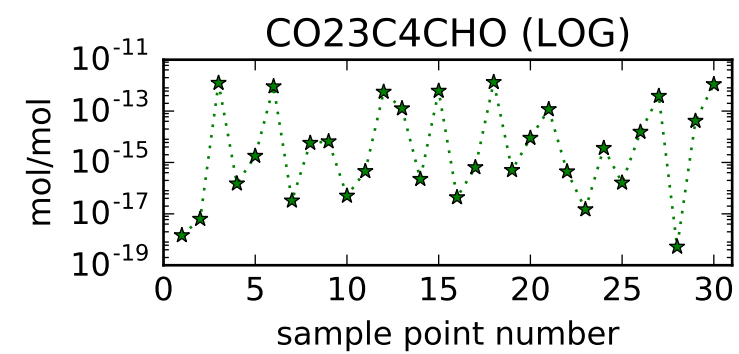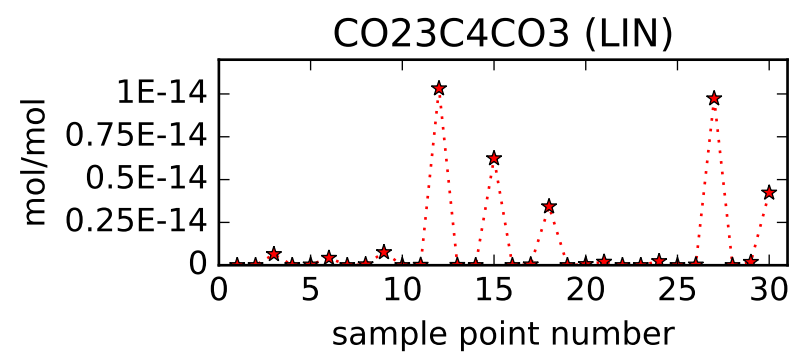

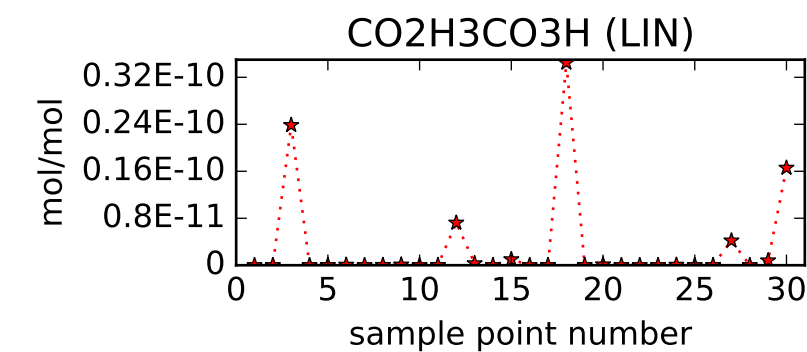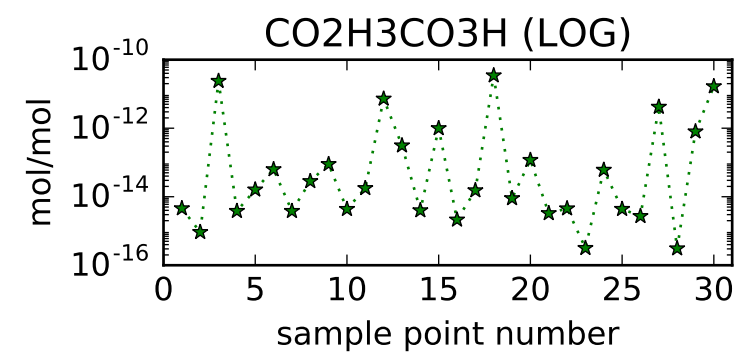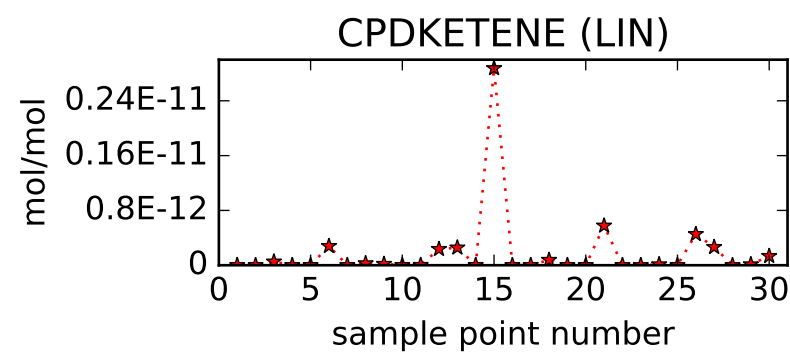

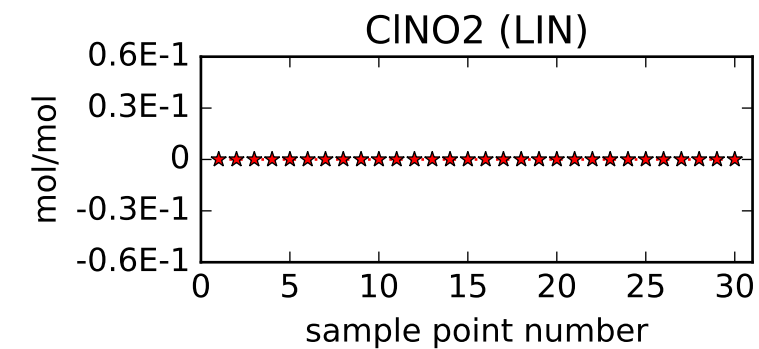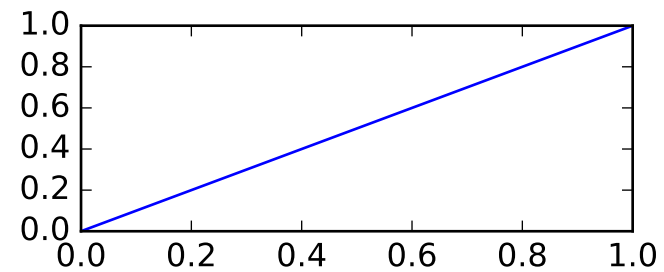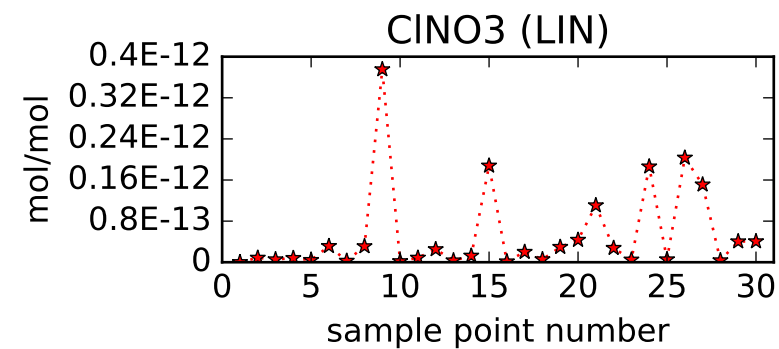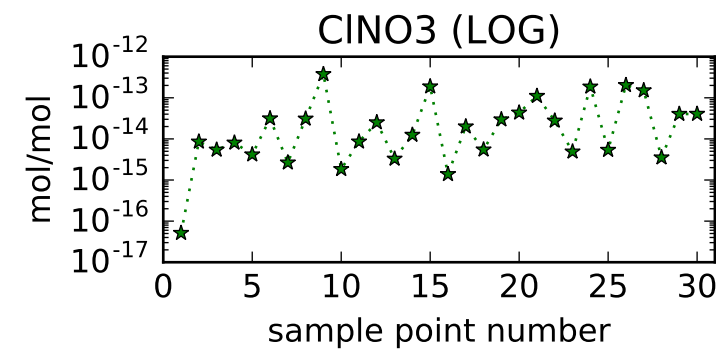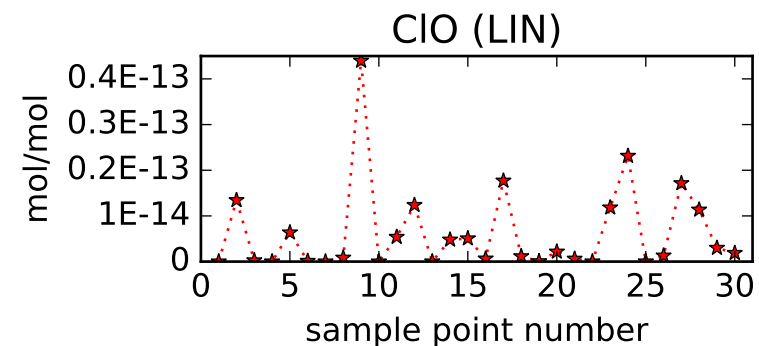









































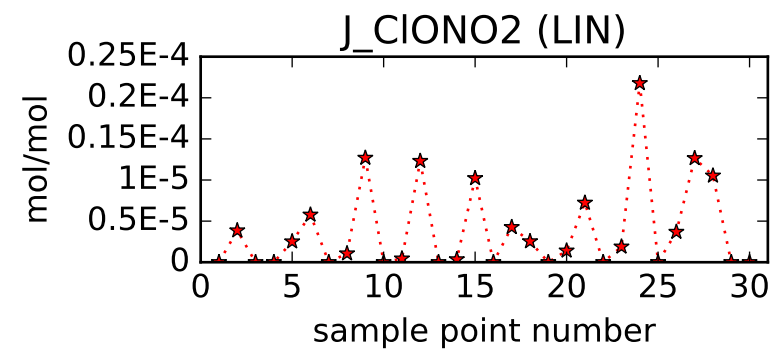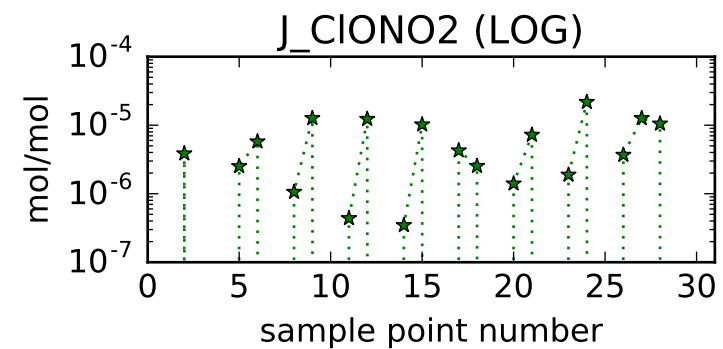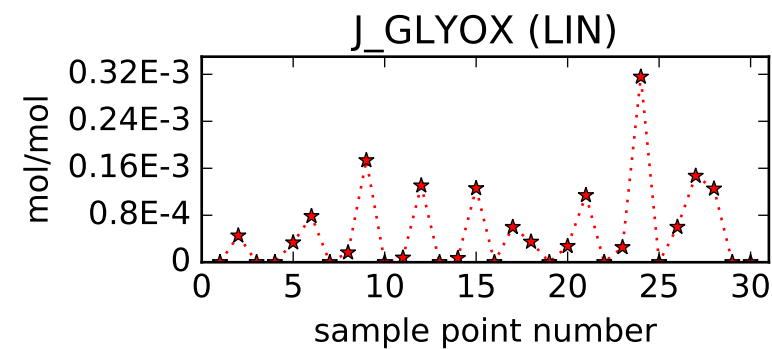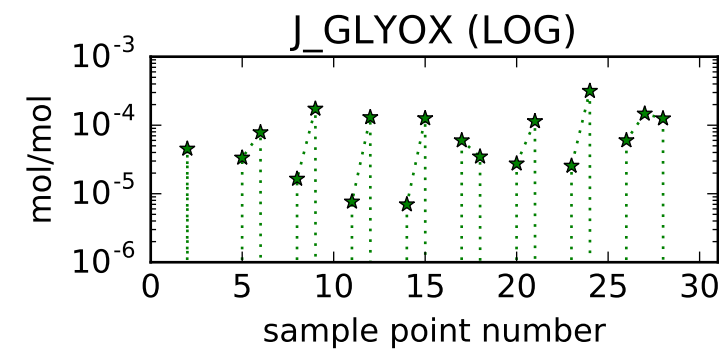



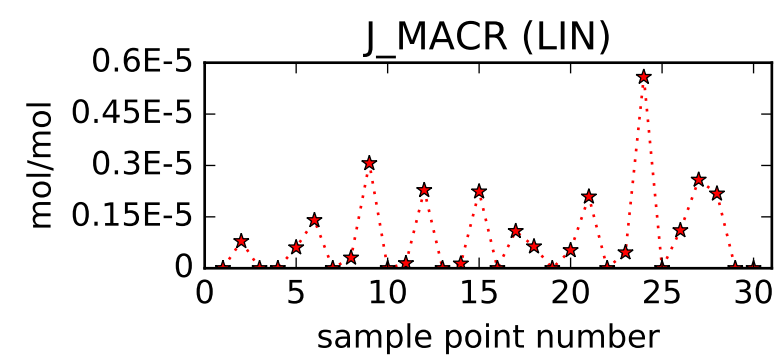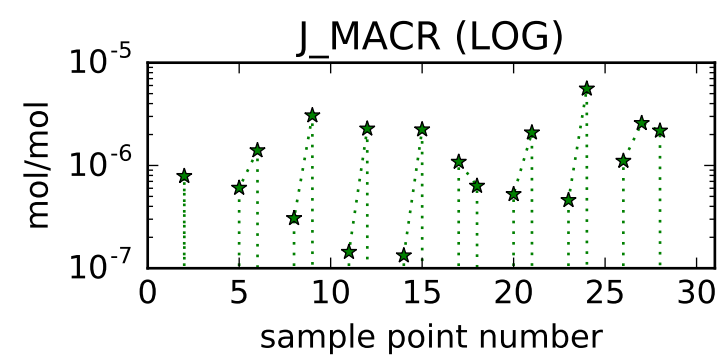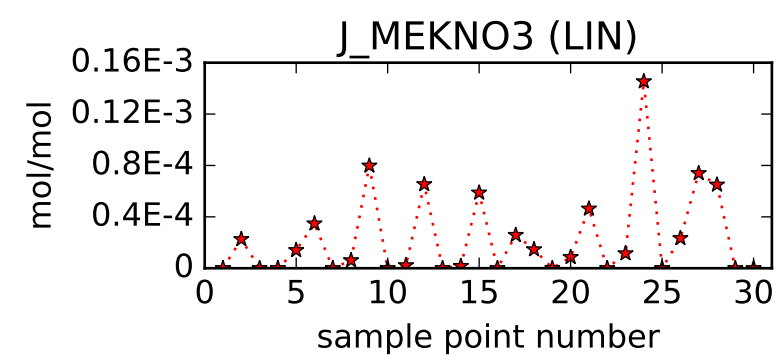

Supplement: Supplementary file 20 [file gmd-2020-337-supplement.zip › caaba_4.5.0gmdd/skeleton/samplepoints/skeleton_samplepoints_30_loworg.pdf]
