# Supplementary material for: Oxidation of low-molecular weight organic compounds in clouddroplets: development of the JAMOC chemical mechanism inCAABA/MECCA (version 4.5.0gmdd)
Source: Copernicus journal article supplement (doi:10.5194/gmd-2020-337), 2020-10-29

J\_BENZAL

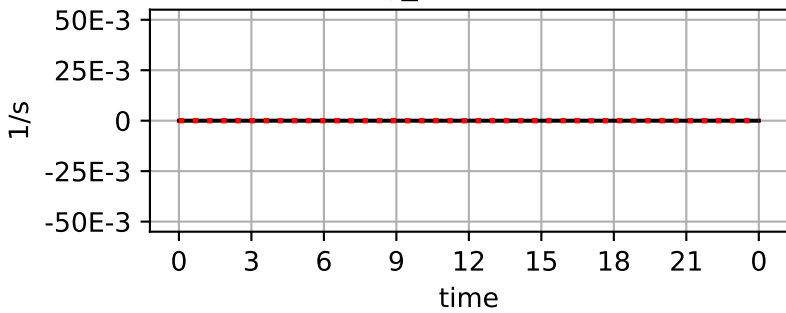

J\_Br2

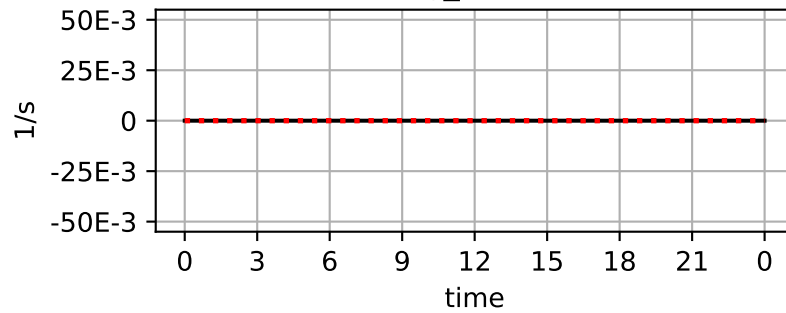

J\_BrCl

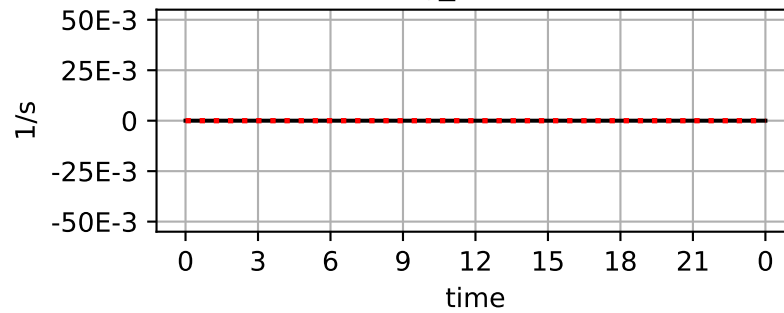

J\_BrNO2

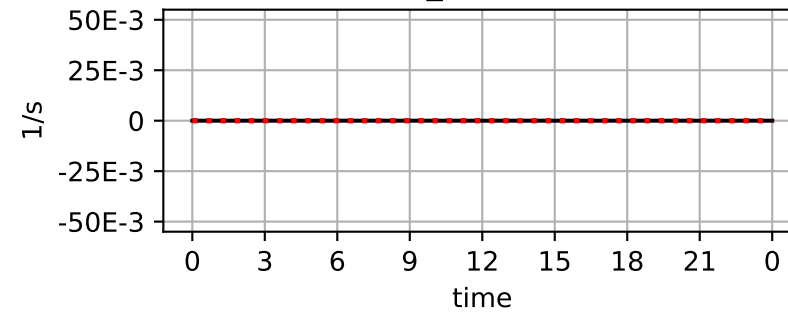

J\_BrNO3

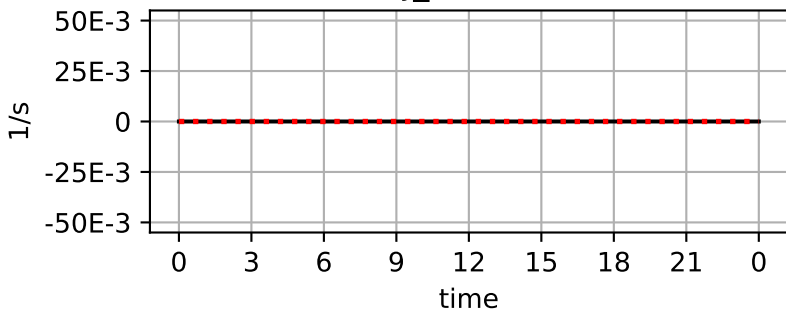

J\_BrO

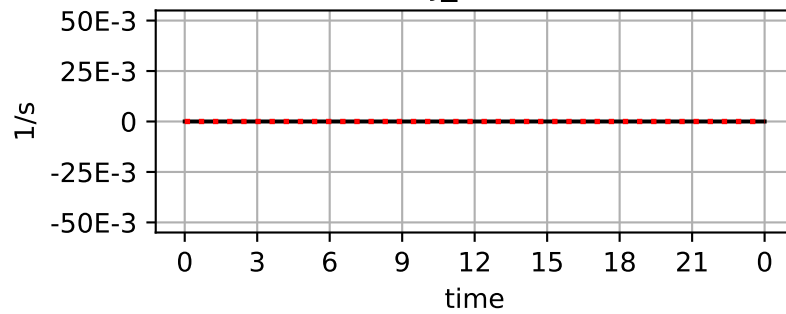

J\_BrONO2

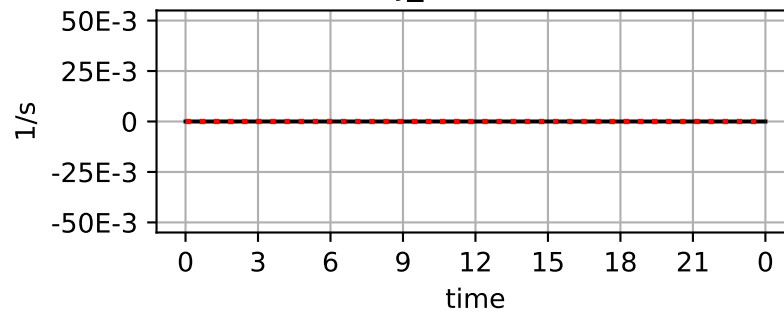

J\_C2H5CHO2ENOL

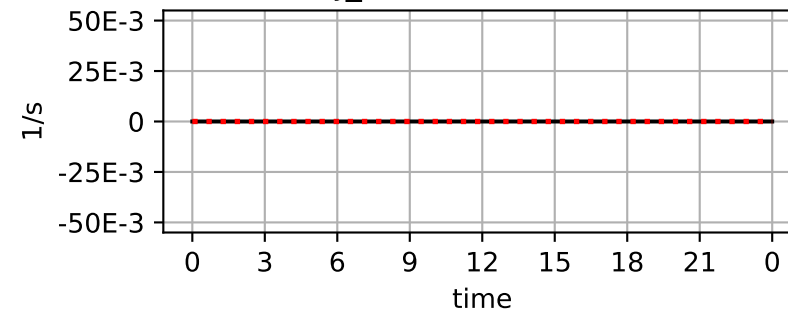

J\_C2H5CHO2HCO

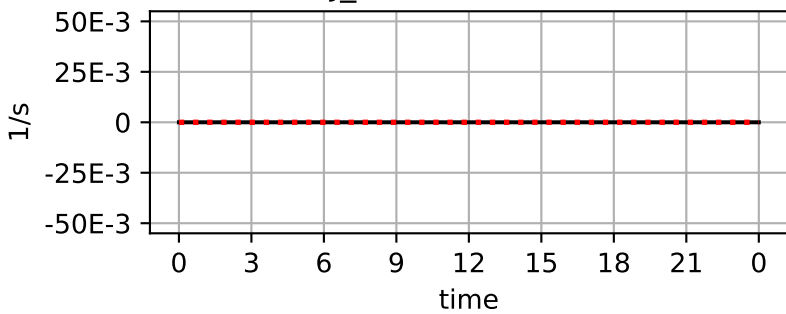

J\_C2H5NO3

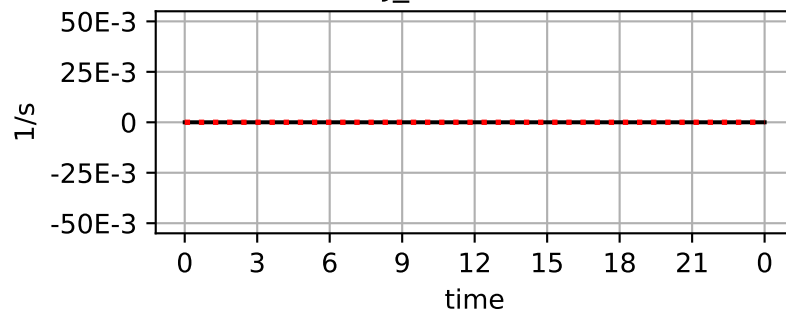

J\_C3H7CHO2HCO

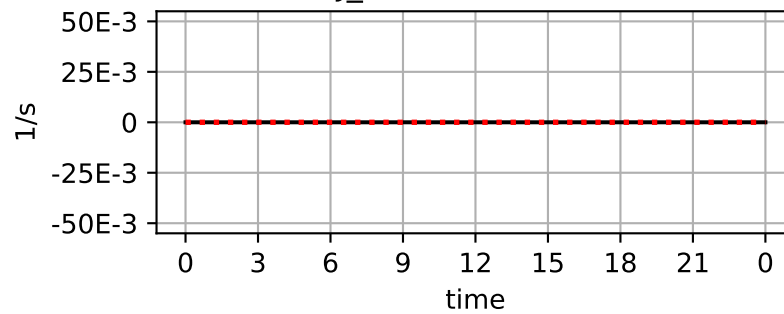

J\_C3H7CHO2VINYL

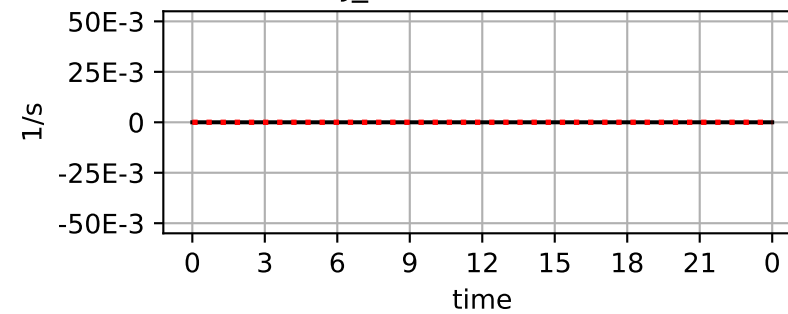

J\_C3H7I

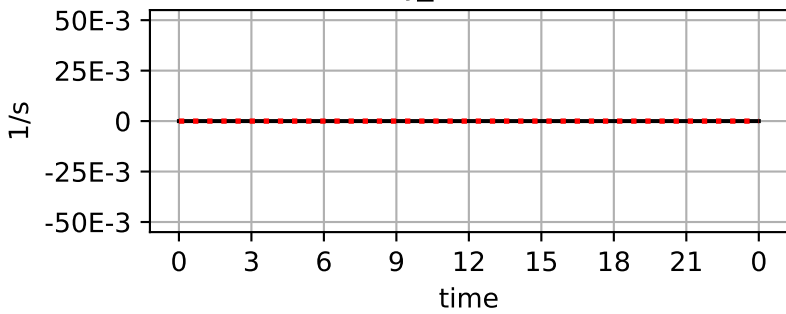

J\_C3O2

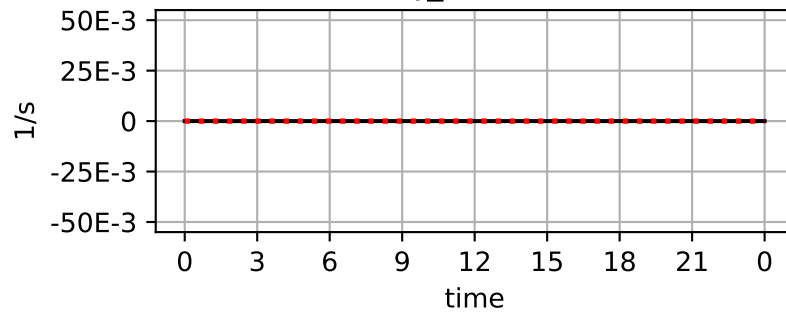

J\_CCl4

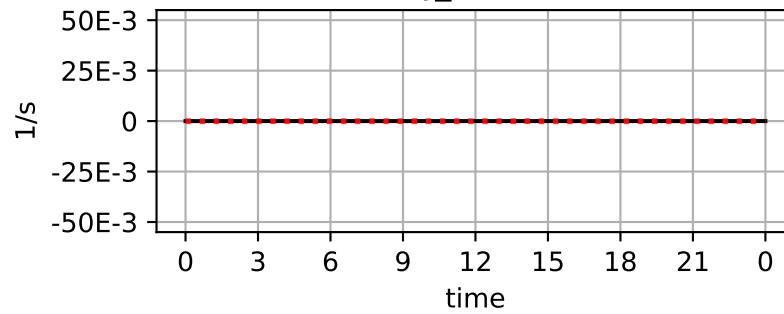

J\_CF2Cl2

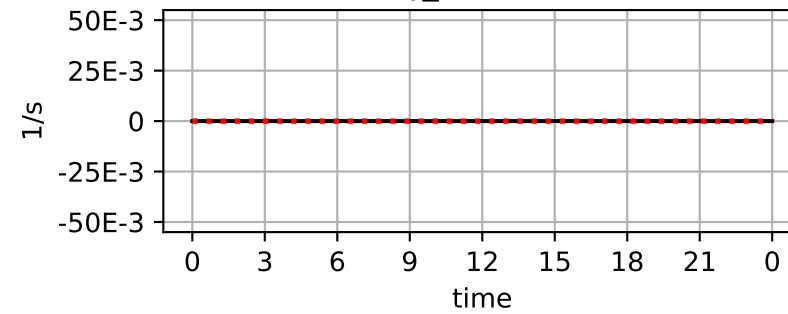

J\_CF2ClBr

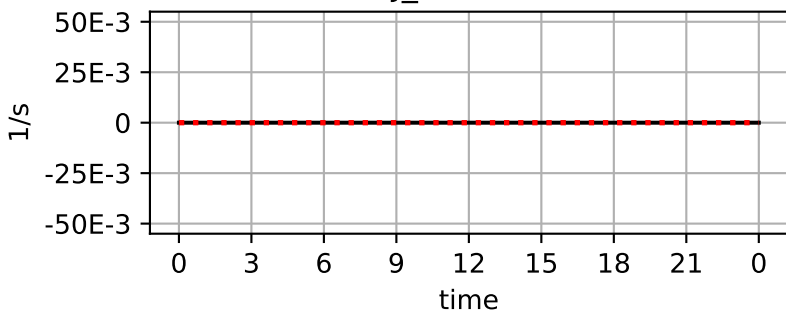

J\_CF2ClCF2Cl

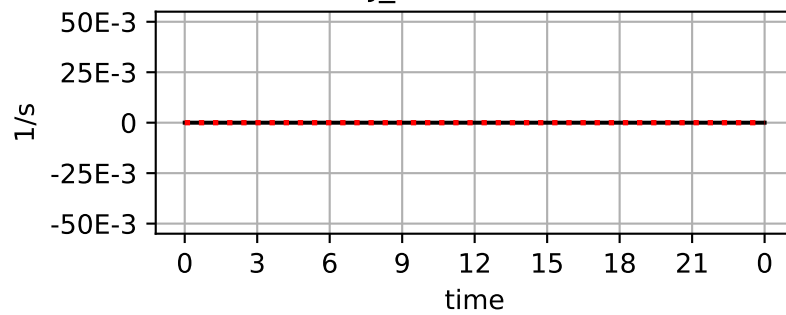

J\_CF2ClCFCl2

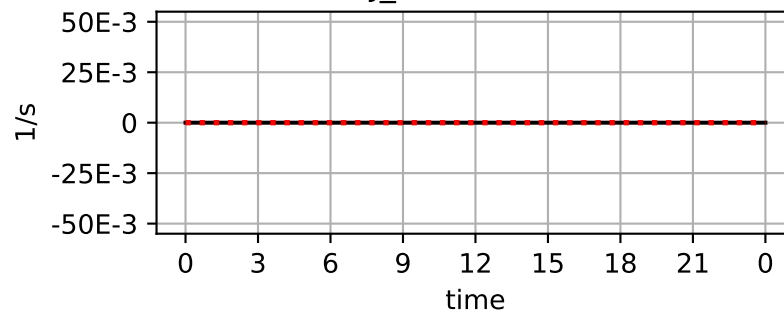

J\_CF3Br

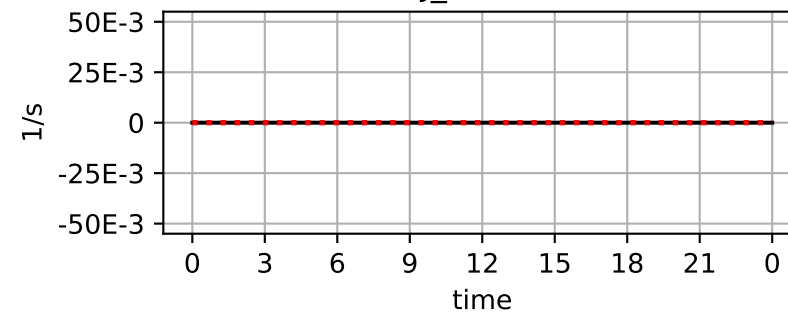

J\_CF3CF2Cl

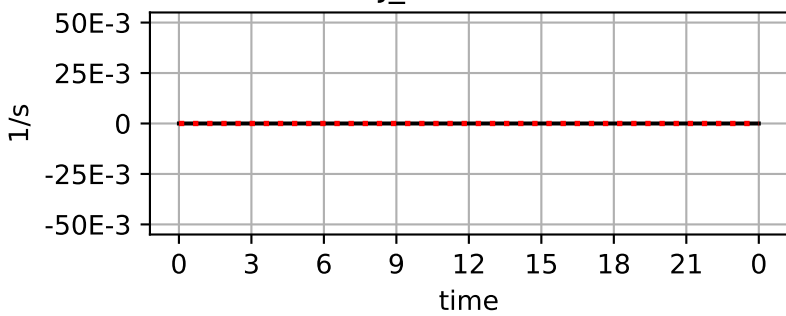

J\_CFCI3

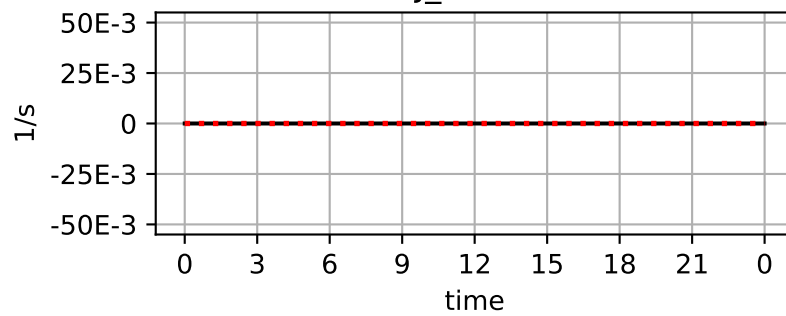

J\_CH2Br2

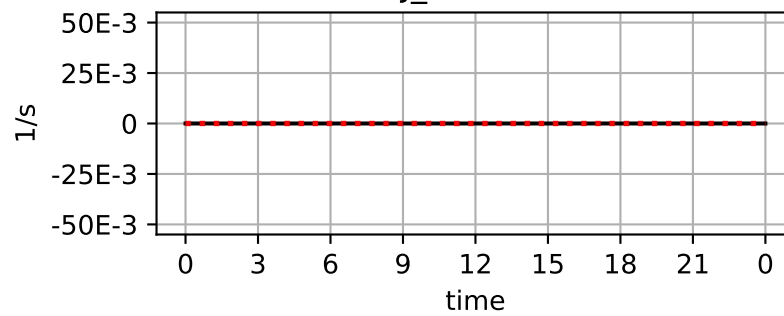

J\_CH2Cl2

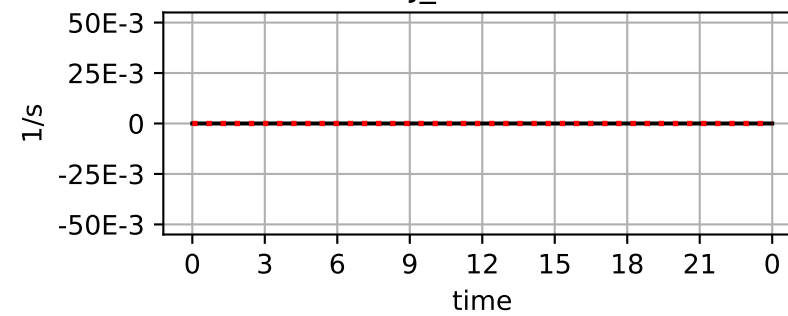

J\_CH2ClBr

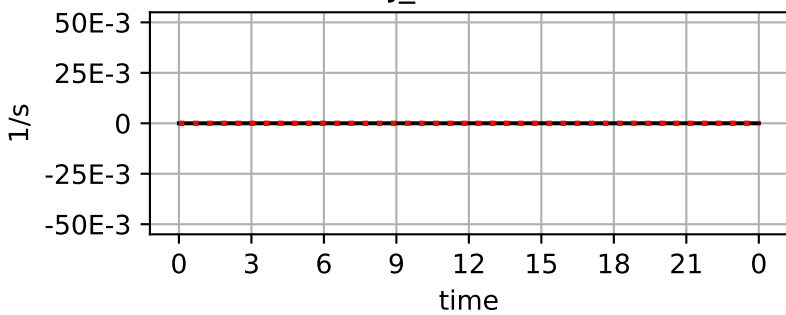

J\_CH2ClI

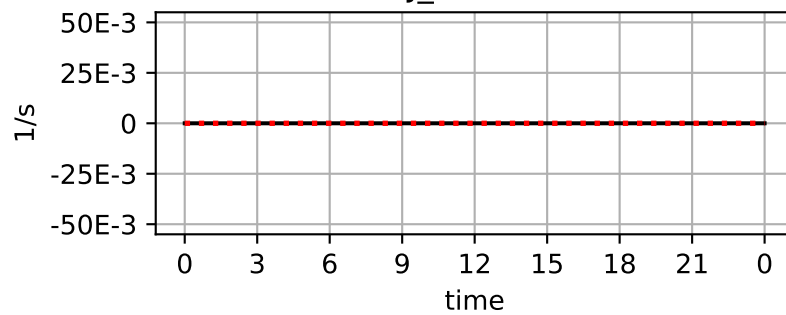

J\_CH2I2

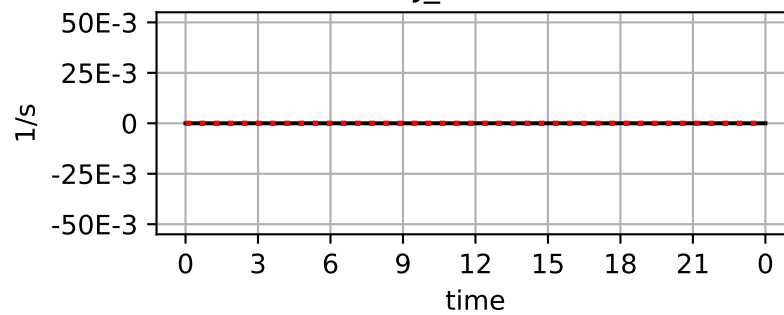

J\_CH3Br

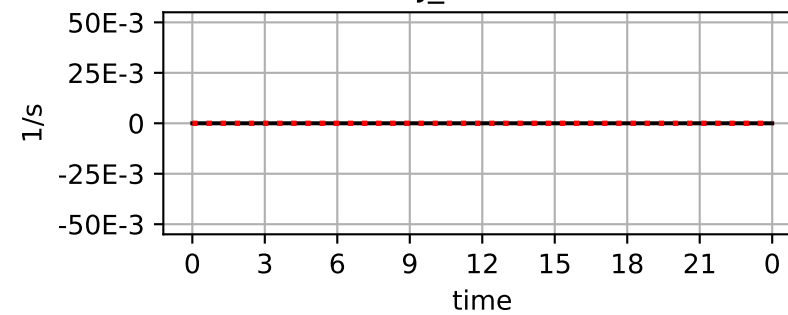

J\_CH3CCl3

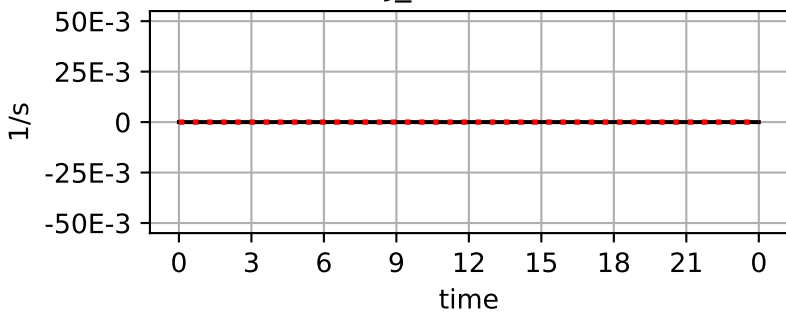

J\_CH3CFCl2

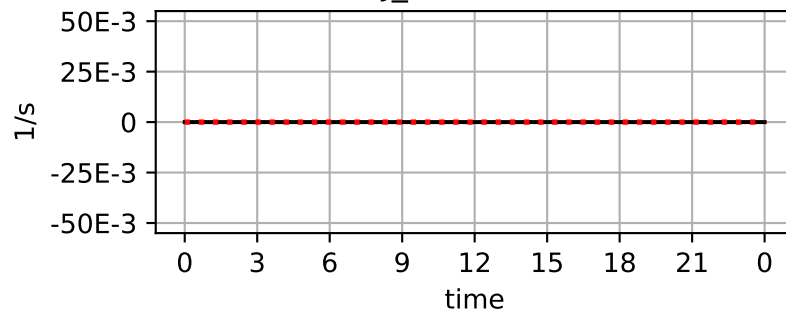

J\_CH3CHO

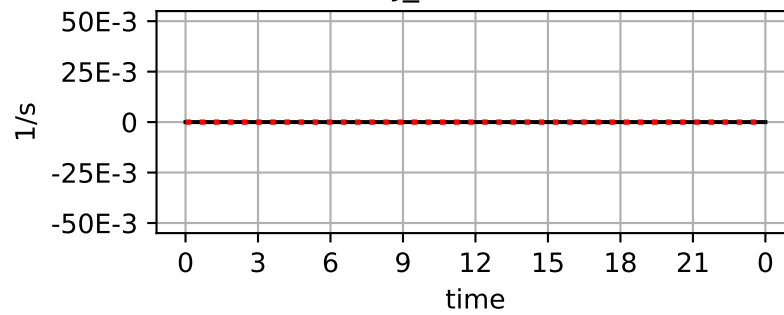

J\_CH3CHO2VINYL

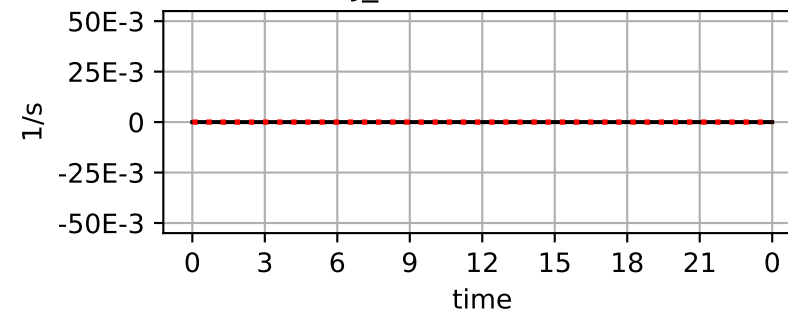

J\_CH3CO3H

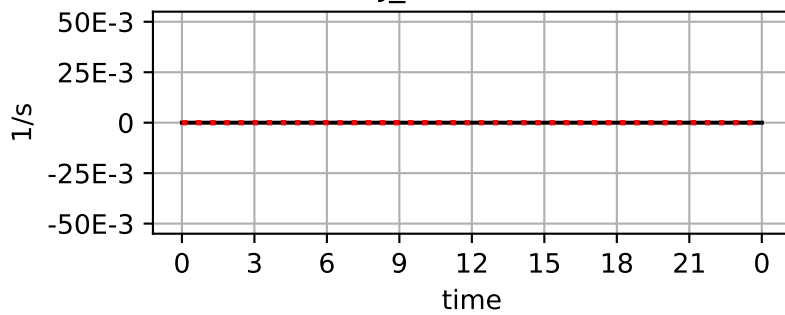

J\_CH3COCH3

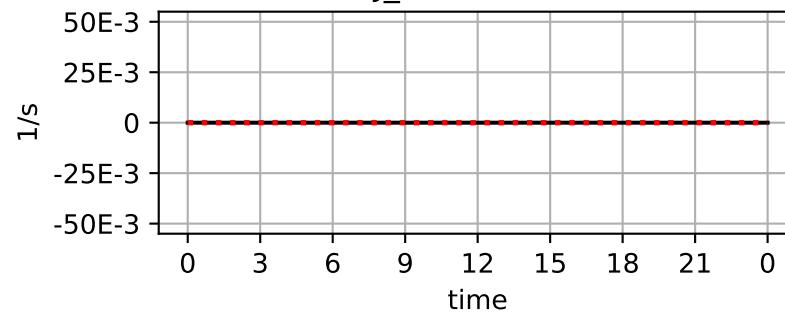

J\_CH3COCO2H

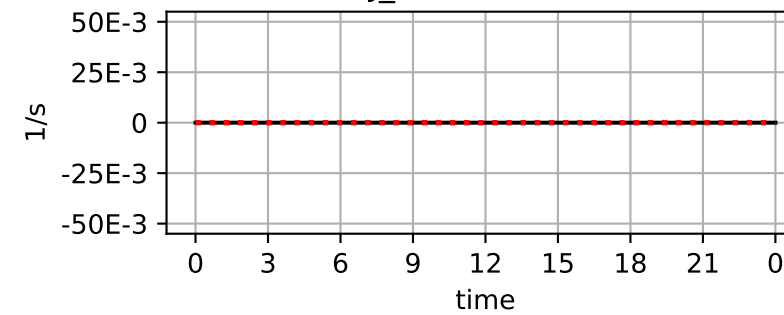

J\_CH3Cl

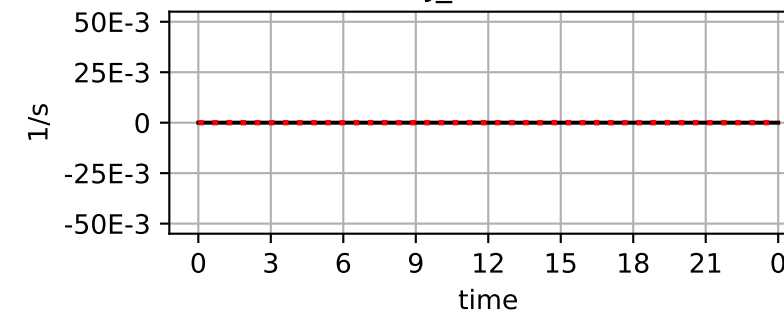

J\_CH3I

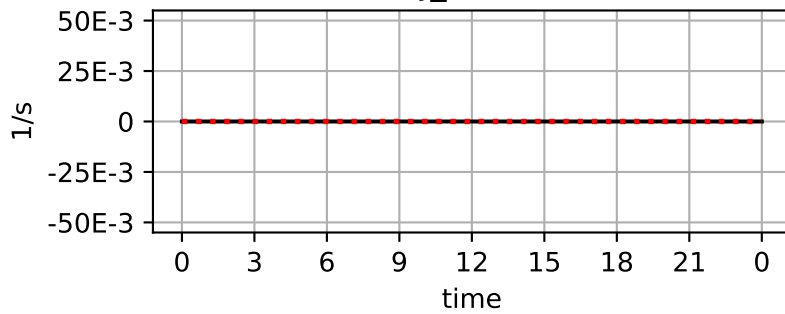

J\_CH3NO3

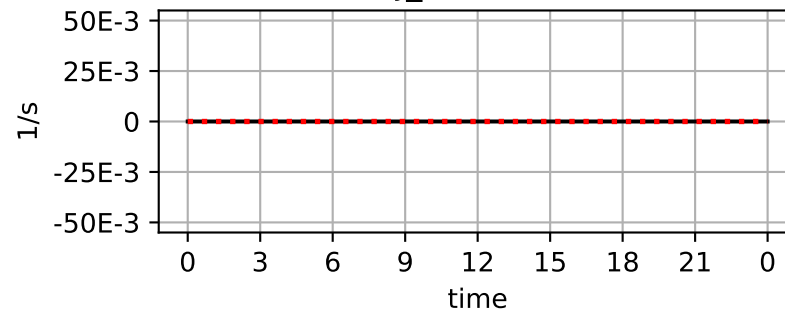

J\_CH3O2

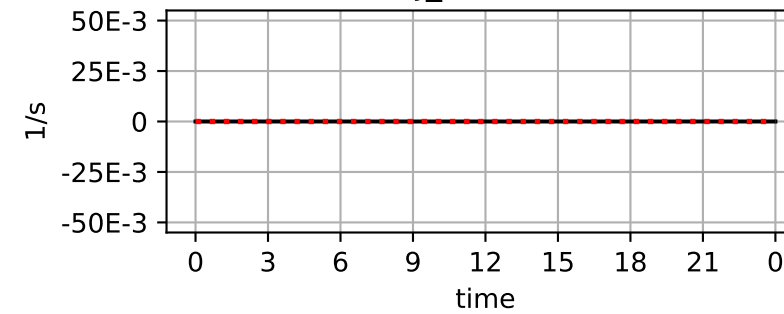

J\_CH3O2NO2

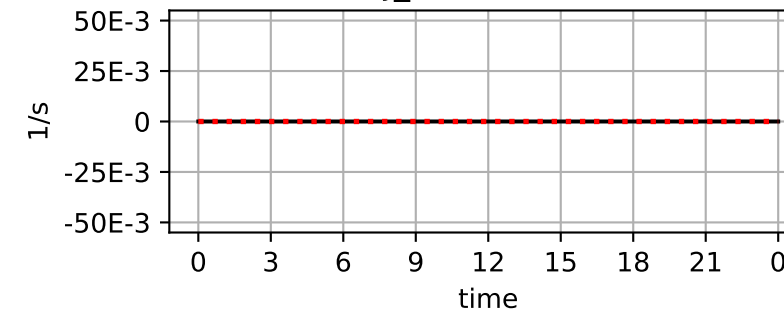

J\_CH3OCl

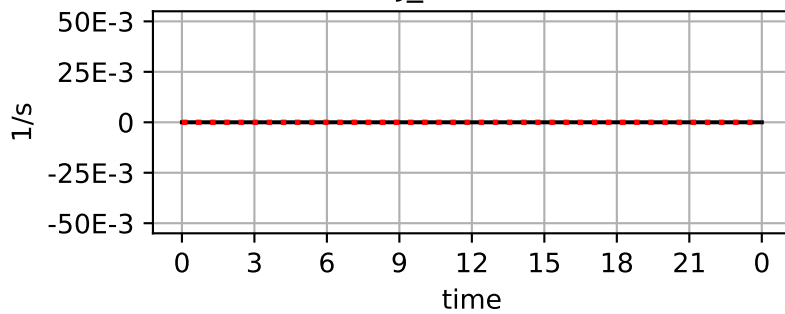

J\_CH3ONO

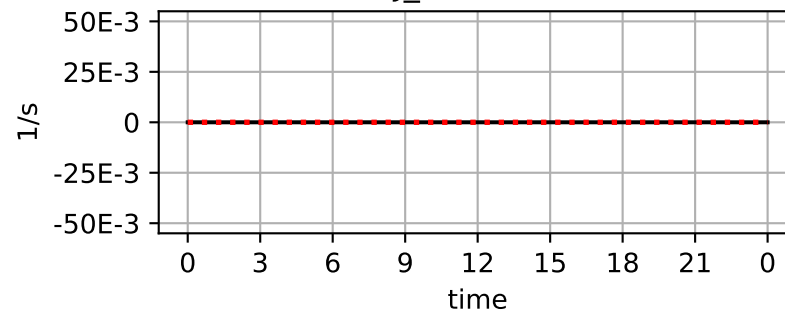

J\_CH3OOH

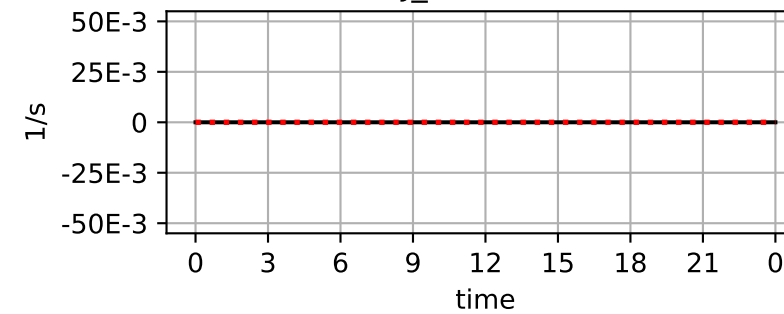

J\_CH4

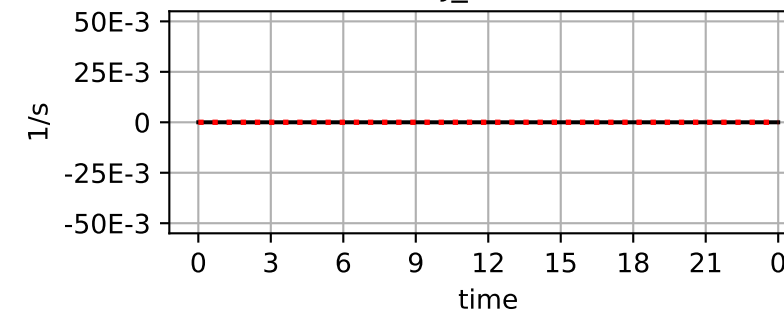

J\_CHBr3

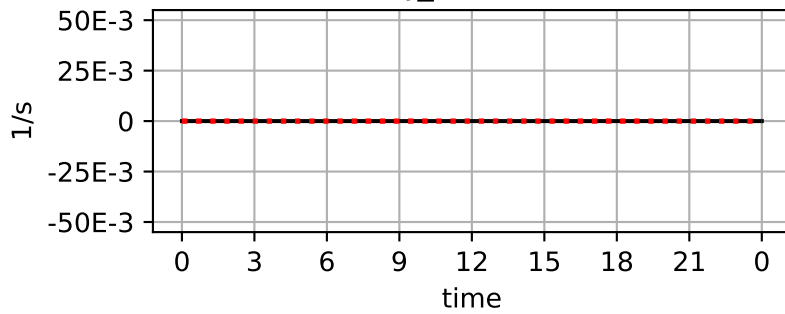

J\_CHCl2Br

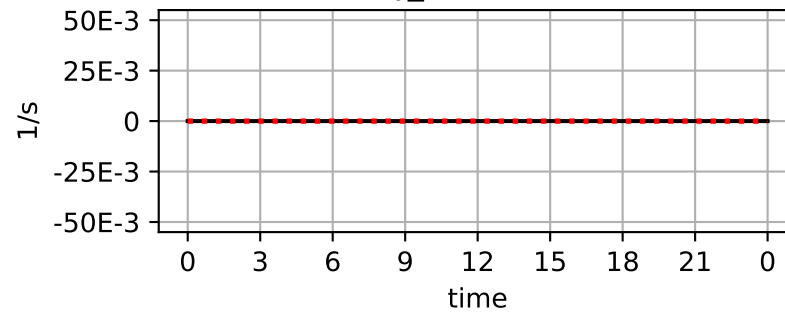

J\_CHCl3

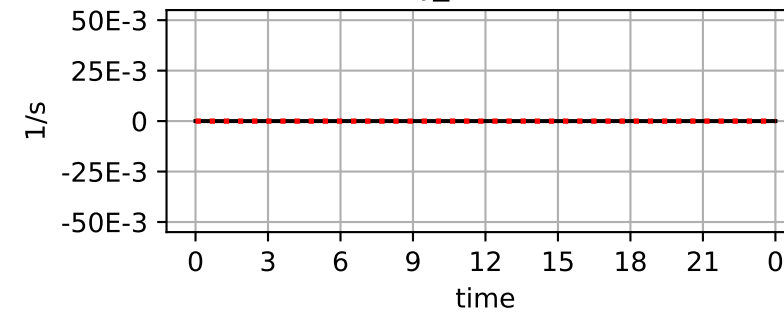

J\_CHClBr2

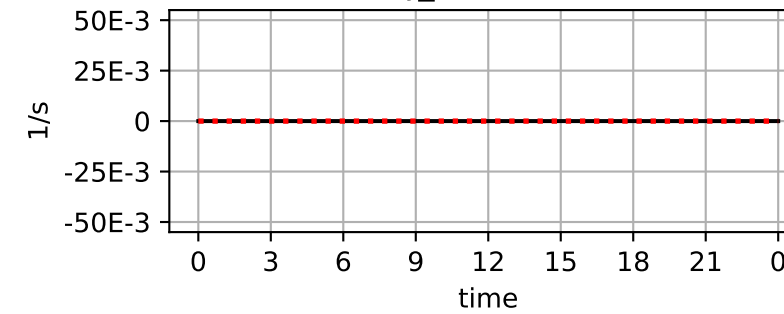

J\_CHF2Cl

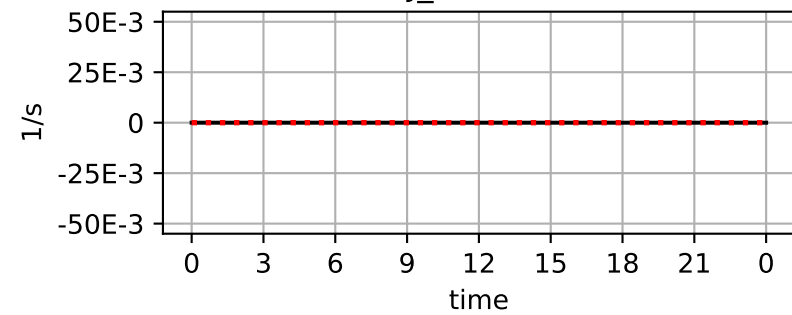

J\_CHOH

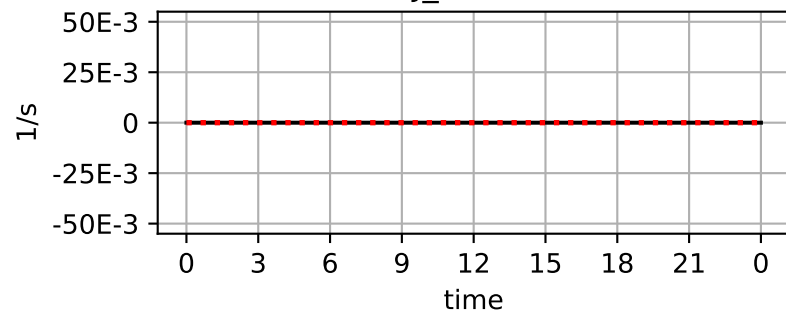

J\_CO2

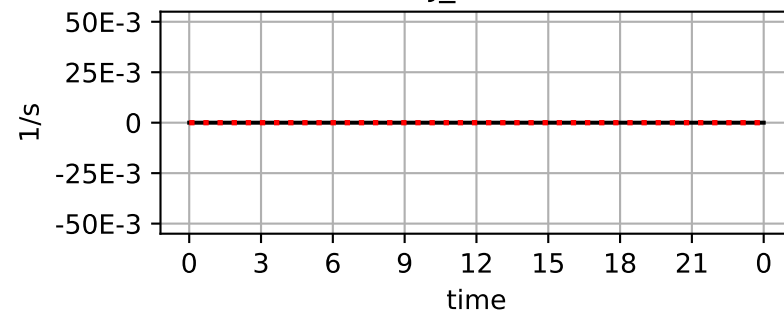

J\_COH2

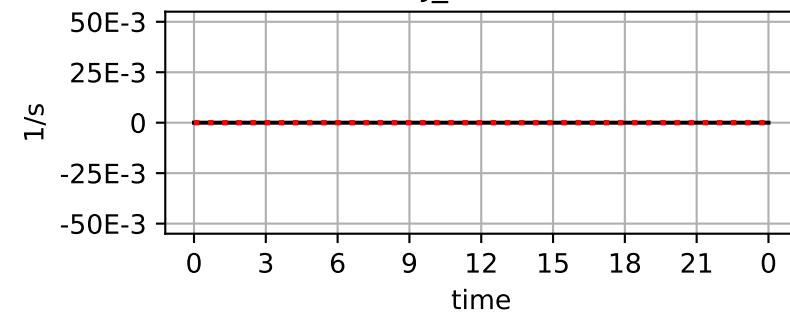

J\_CS2

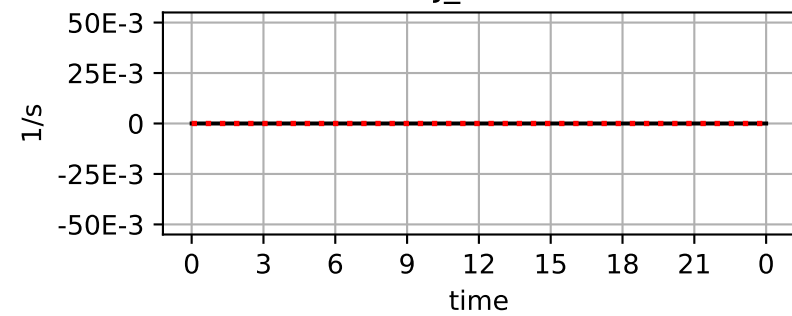

J\_Cl2

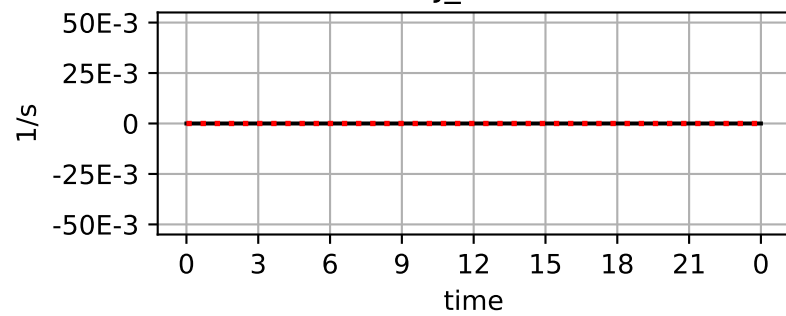

J\_Cl2O2

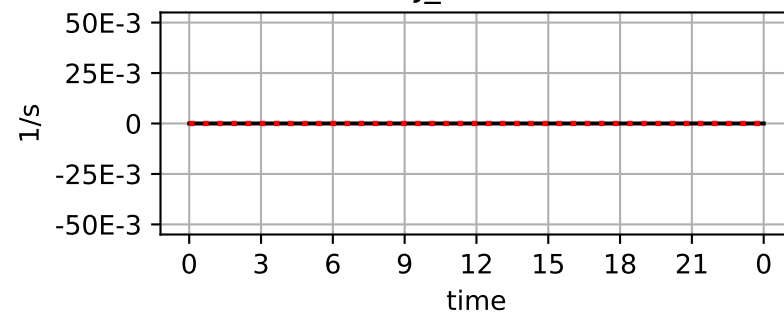

J\_ClNO2

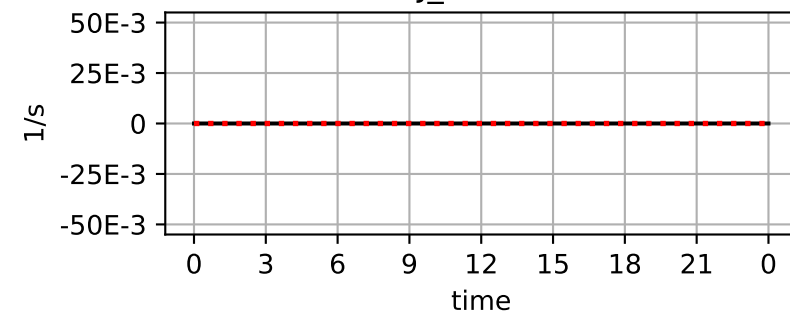

J\_ClNO3

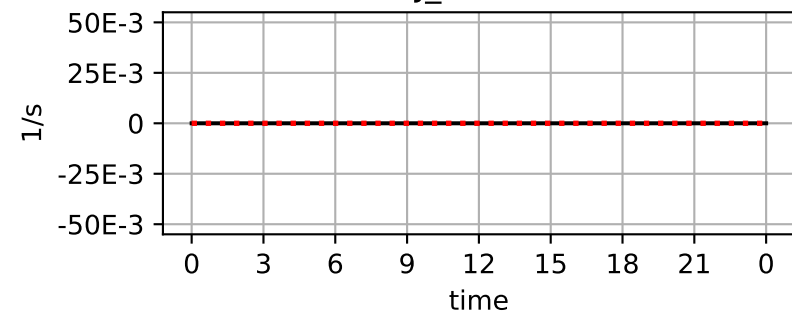

J\_ClONO2

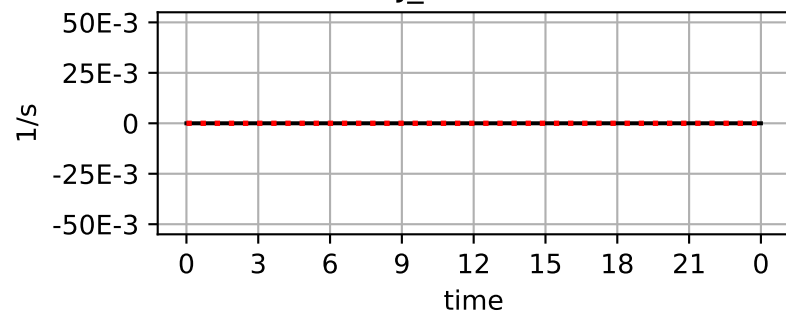

J\_F113

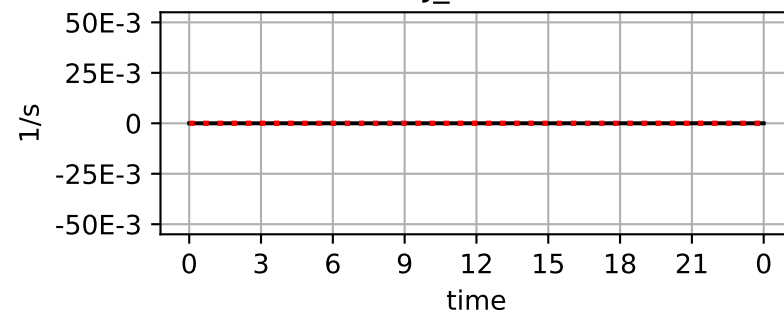

J\_GLYOX

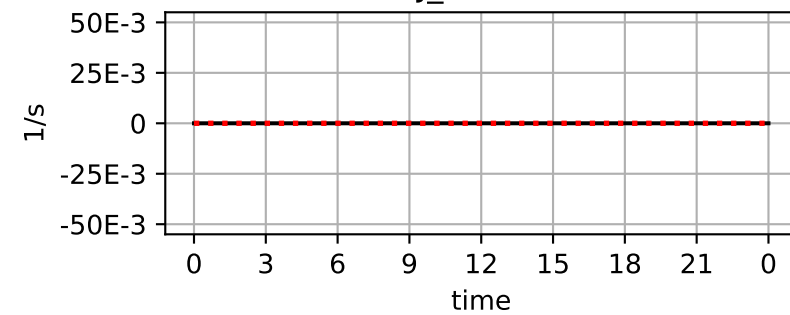

J\_H2O

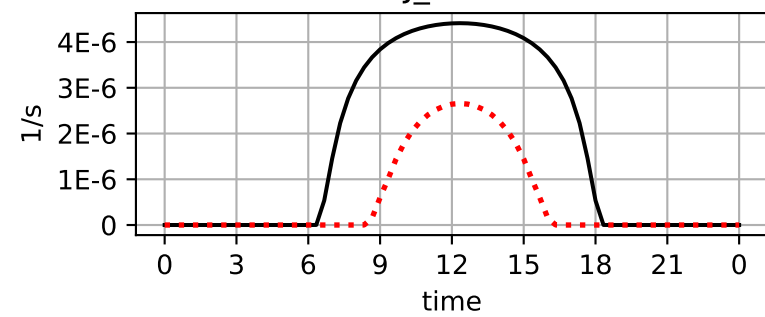

J\_H2O1D

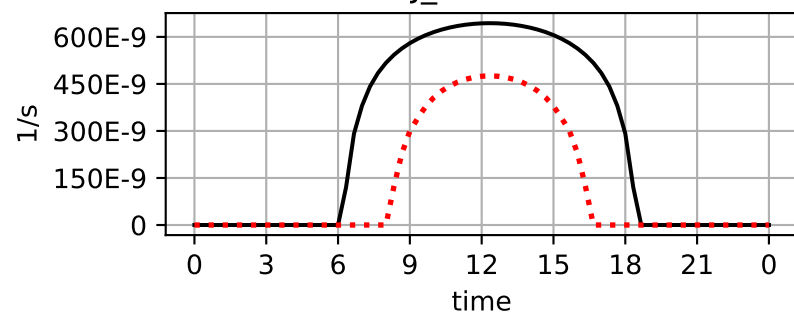

J\_H2O2

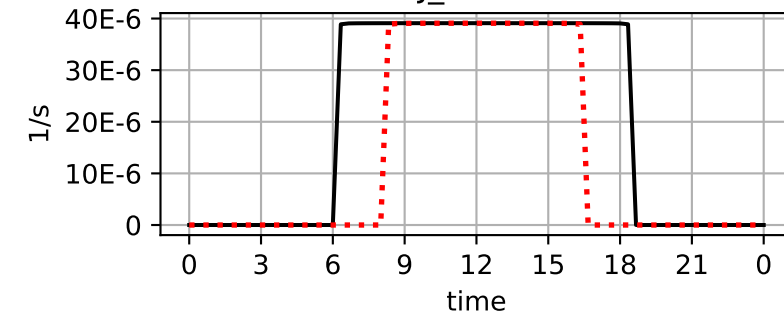

J\_H2SO4

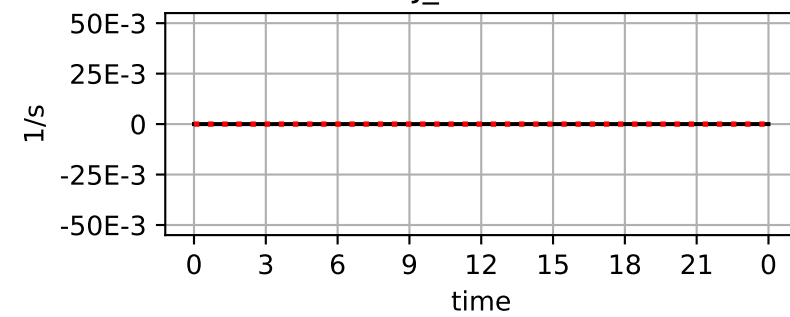

J\_HCOOH

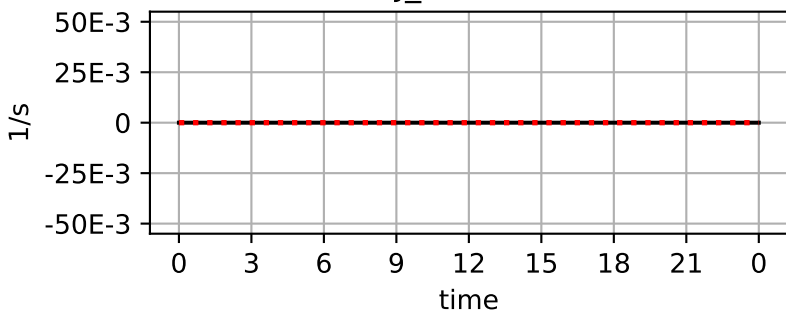

J\_HCl

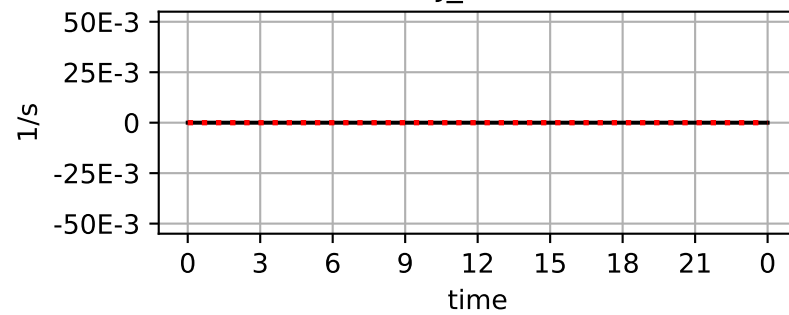

J\_HNO3

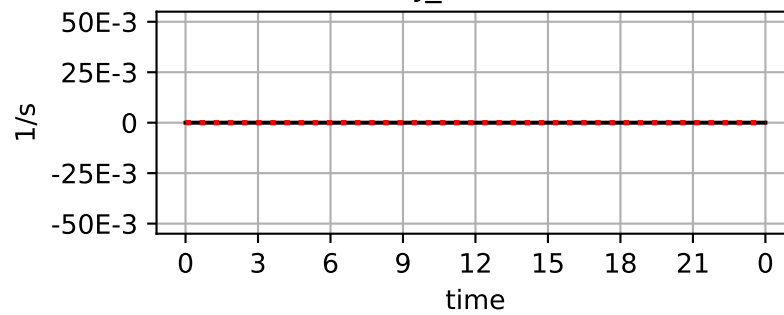

J\_HNO4

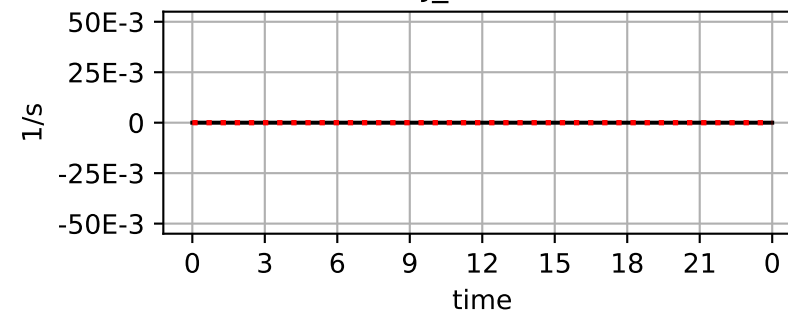

J\_HO2NO2

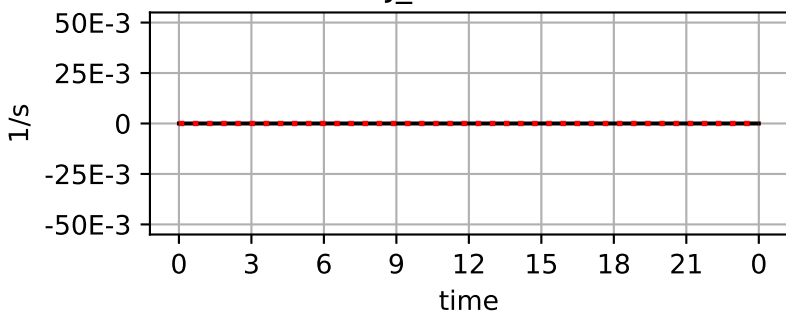

J\_HOBr

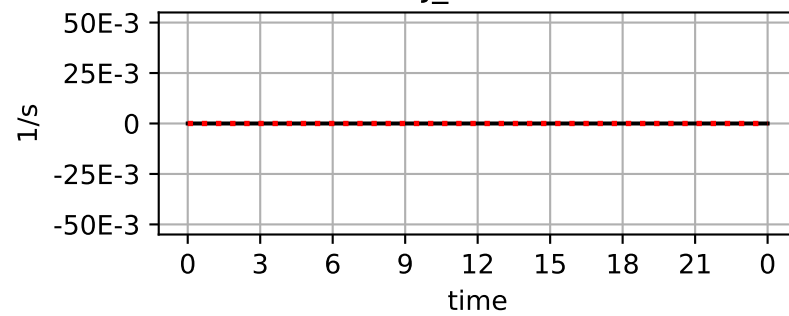

J\_HOC6H4NO2

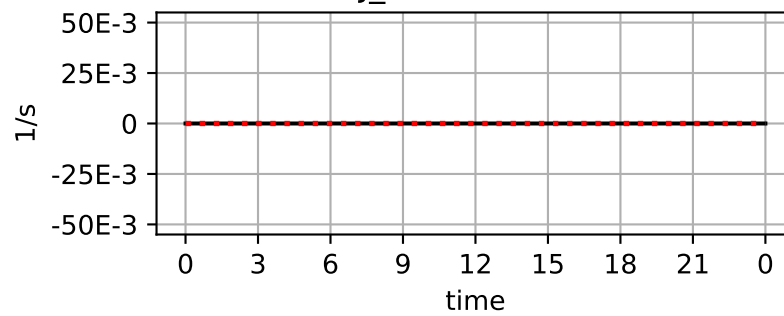

J\_HOCH2CHO

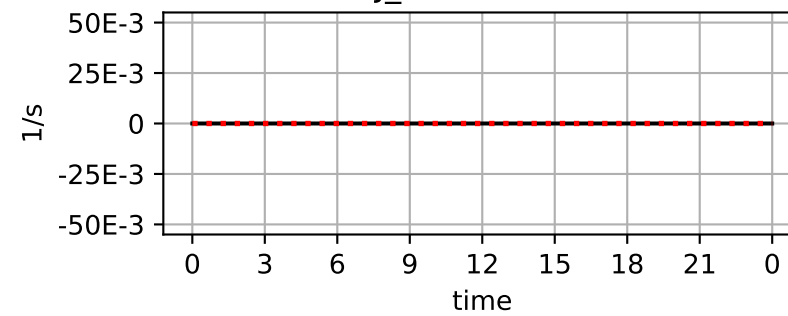

J\_HOCl

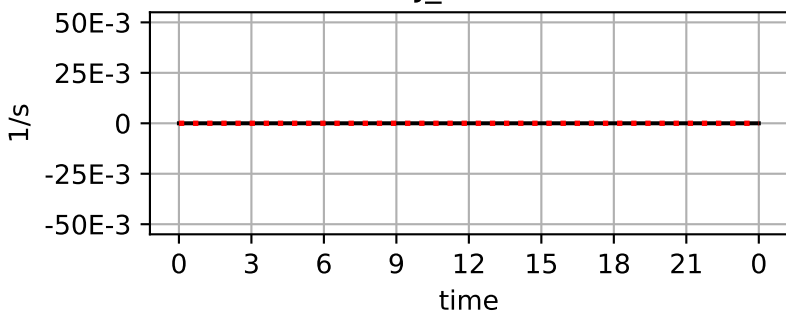

J\_HOI

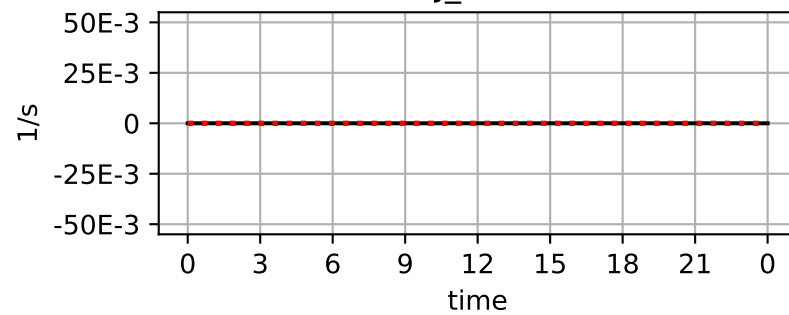

J\_HONO

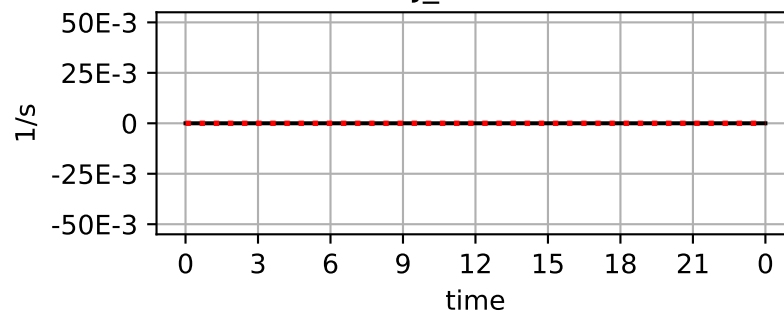

J\_HOPh3Me2NO2

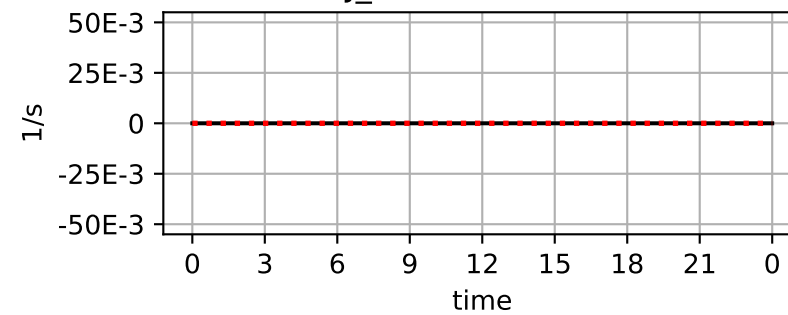

J\_I2

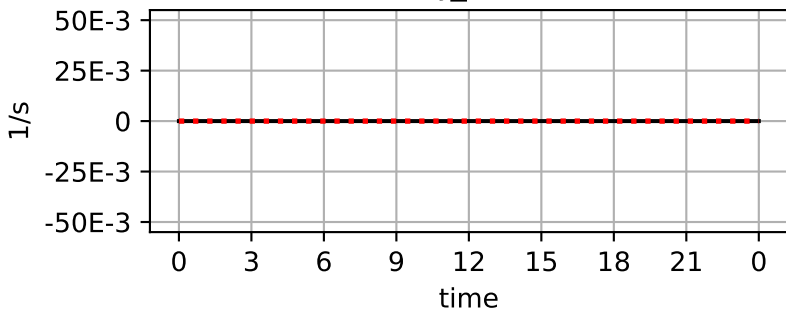

J\_IBr

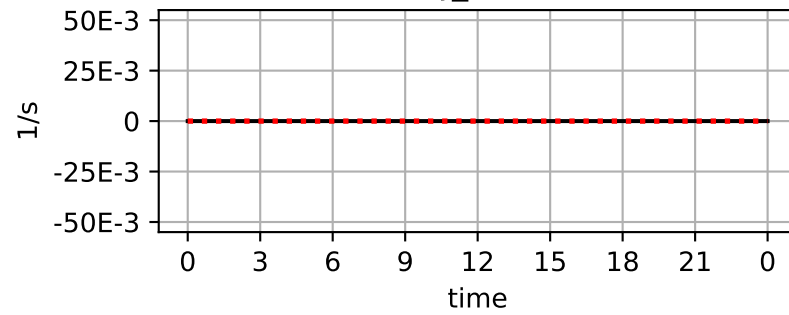

J\_ICl

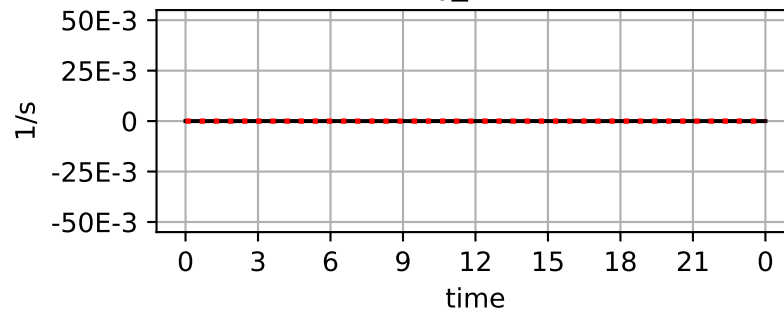

J\_INO2

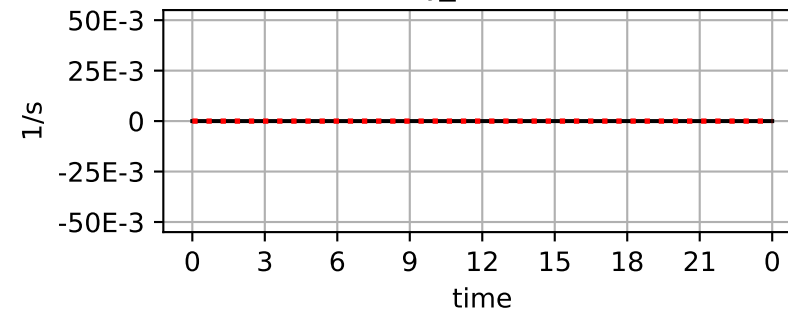

J\_INO3

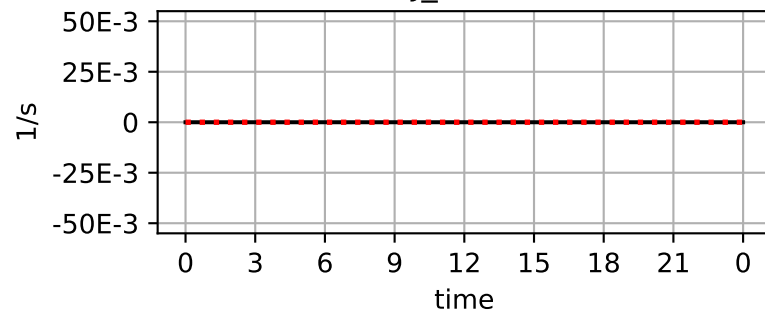

J\_IO

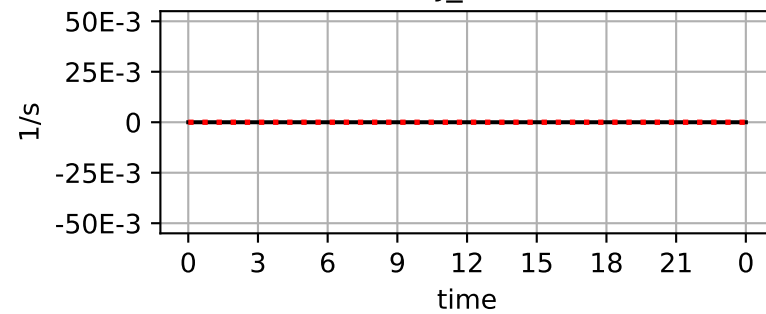

J\_IPRCHO2HCO

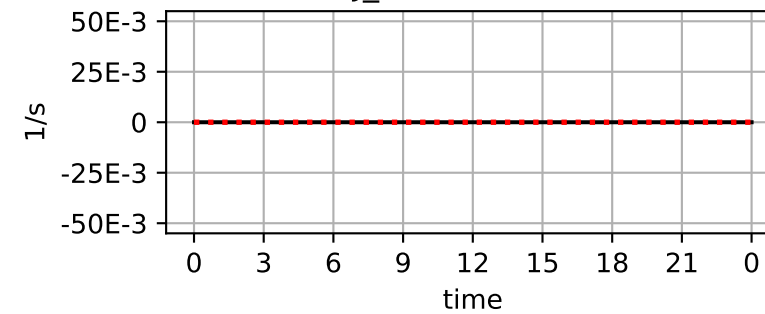

J\_MACR

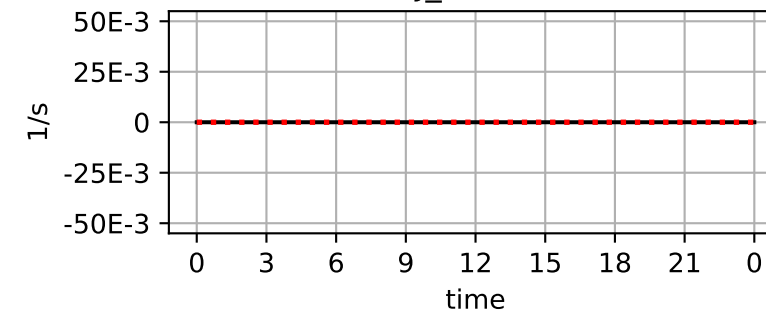

J\_MEKNO3

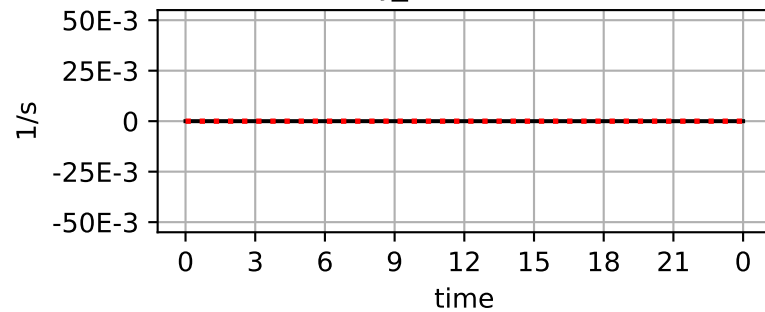

J\_MEO2NO2

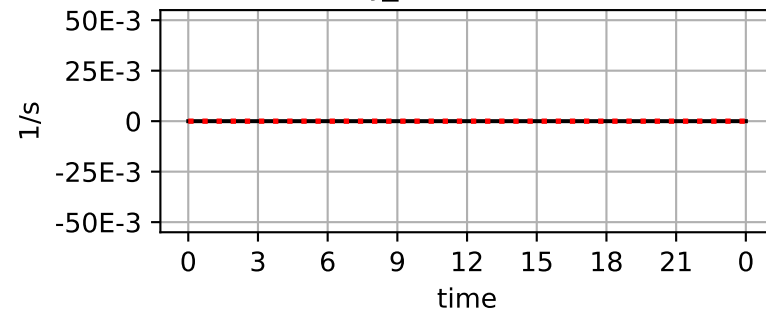

J\_MGLYOX

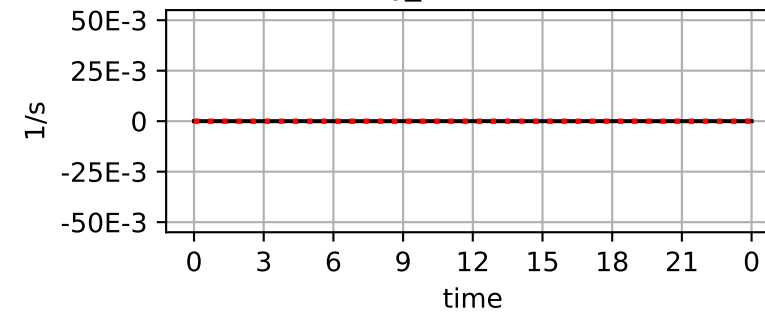

J\_MVK

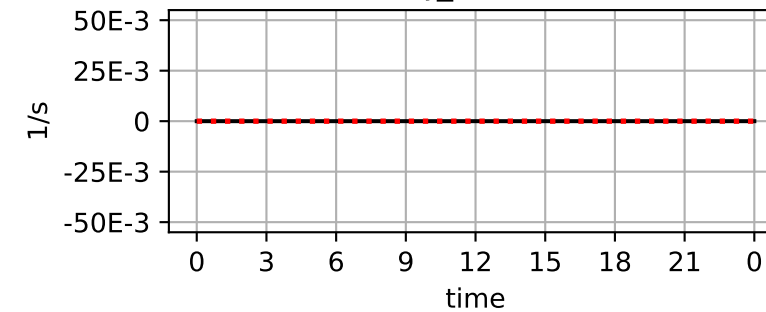

J\_N2

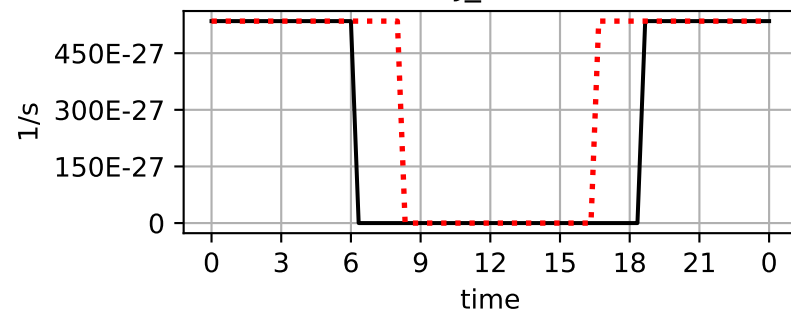

J\_N2O

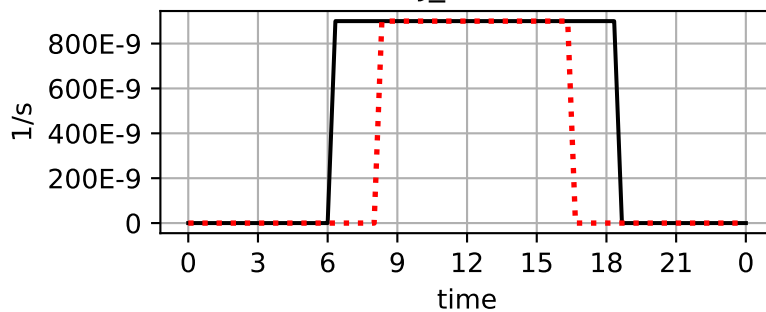

J\_N2O5

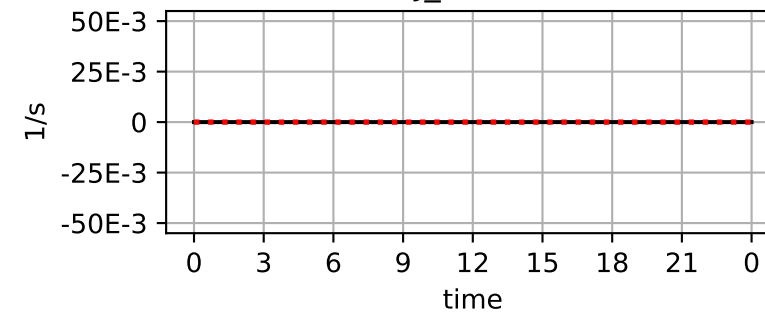

J\_N2\_aurq

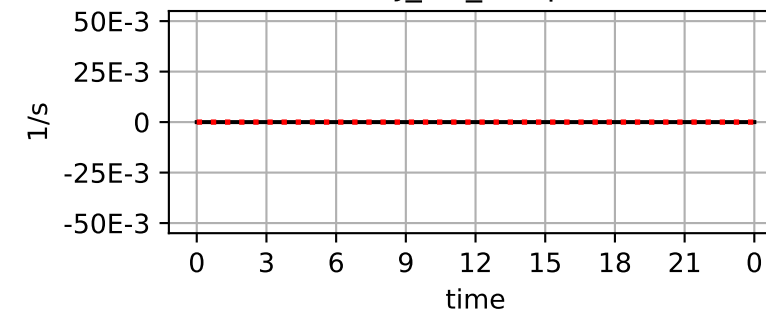

J\_N2\_b1

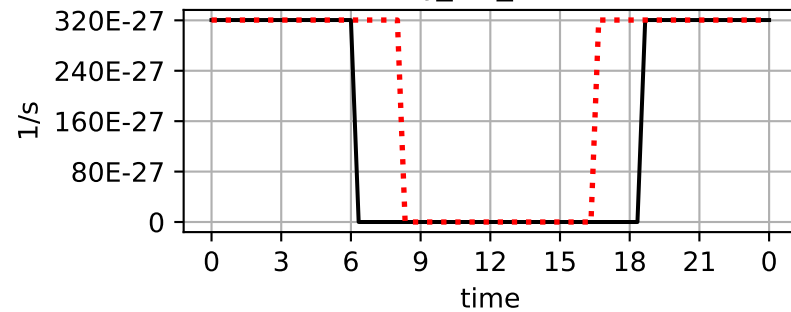

J\_N2\_b2

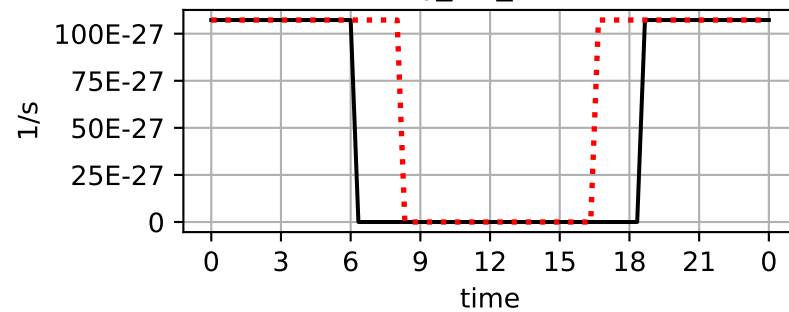

J\_N2\_b3

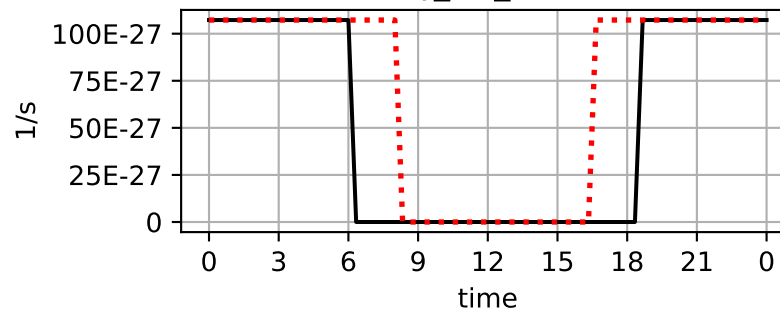

J\_N2p\_em

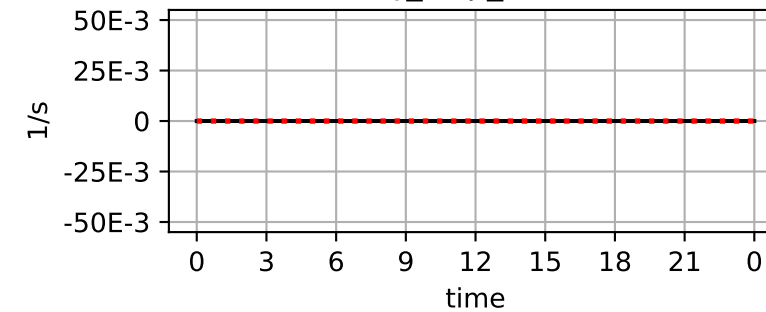

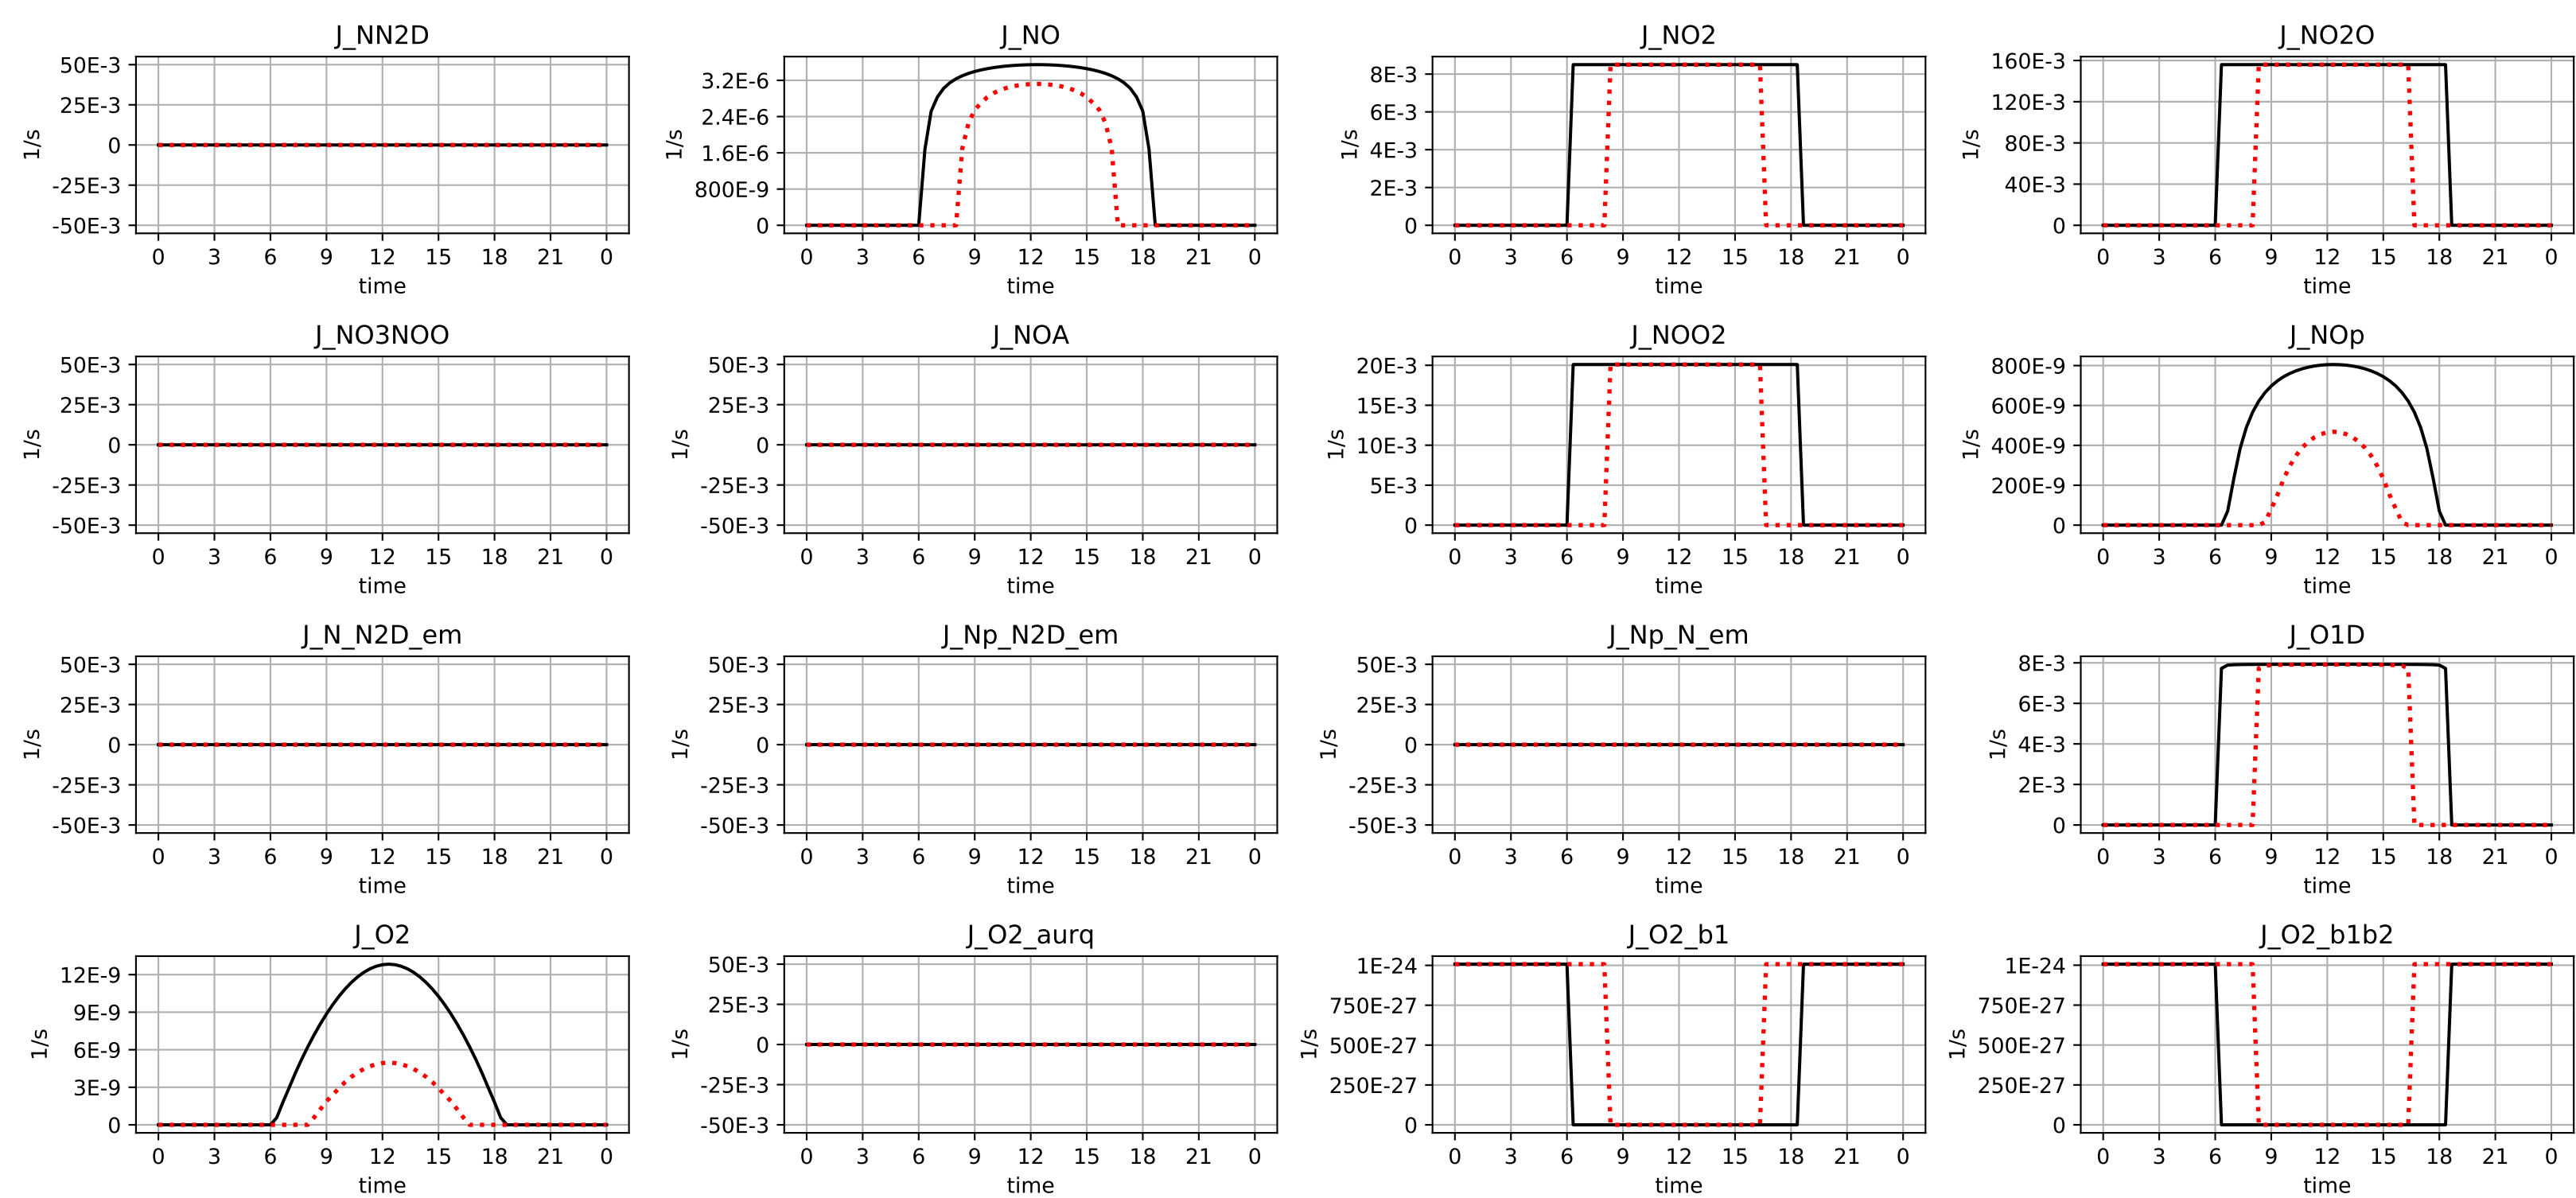

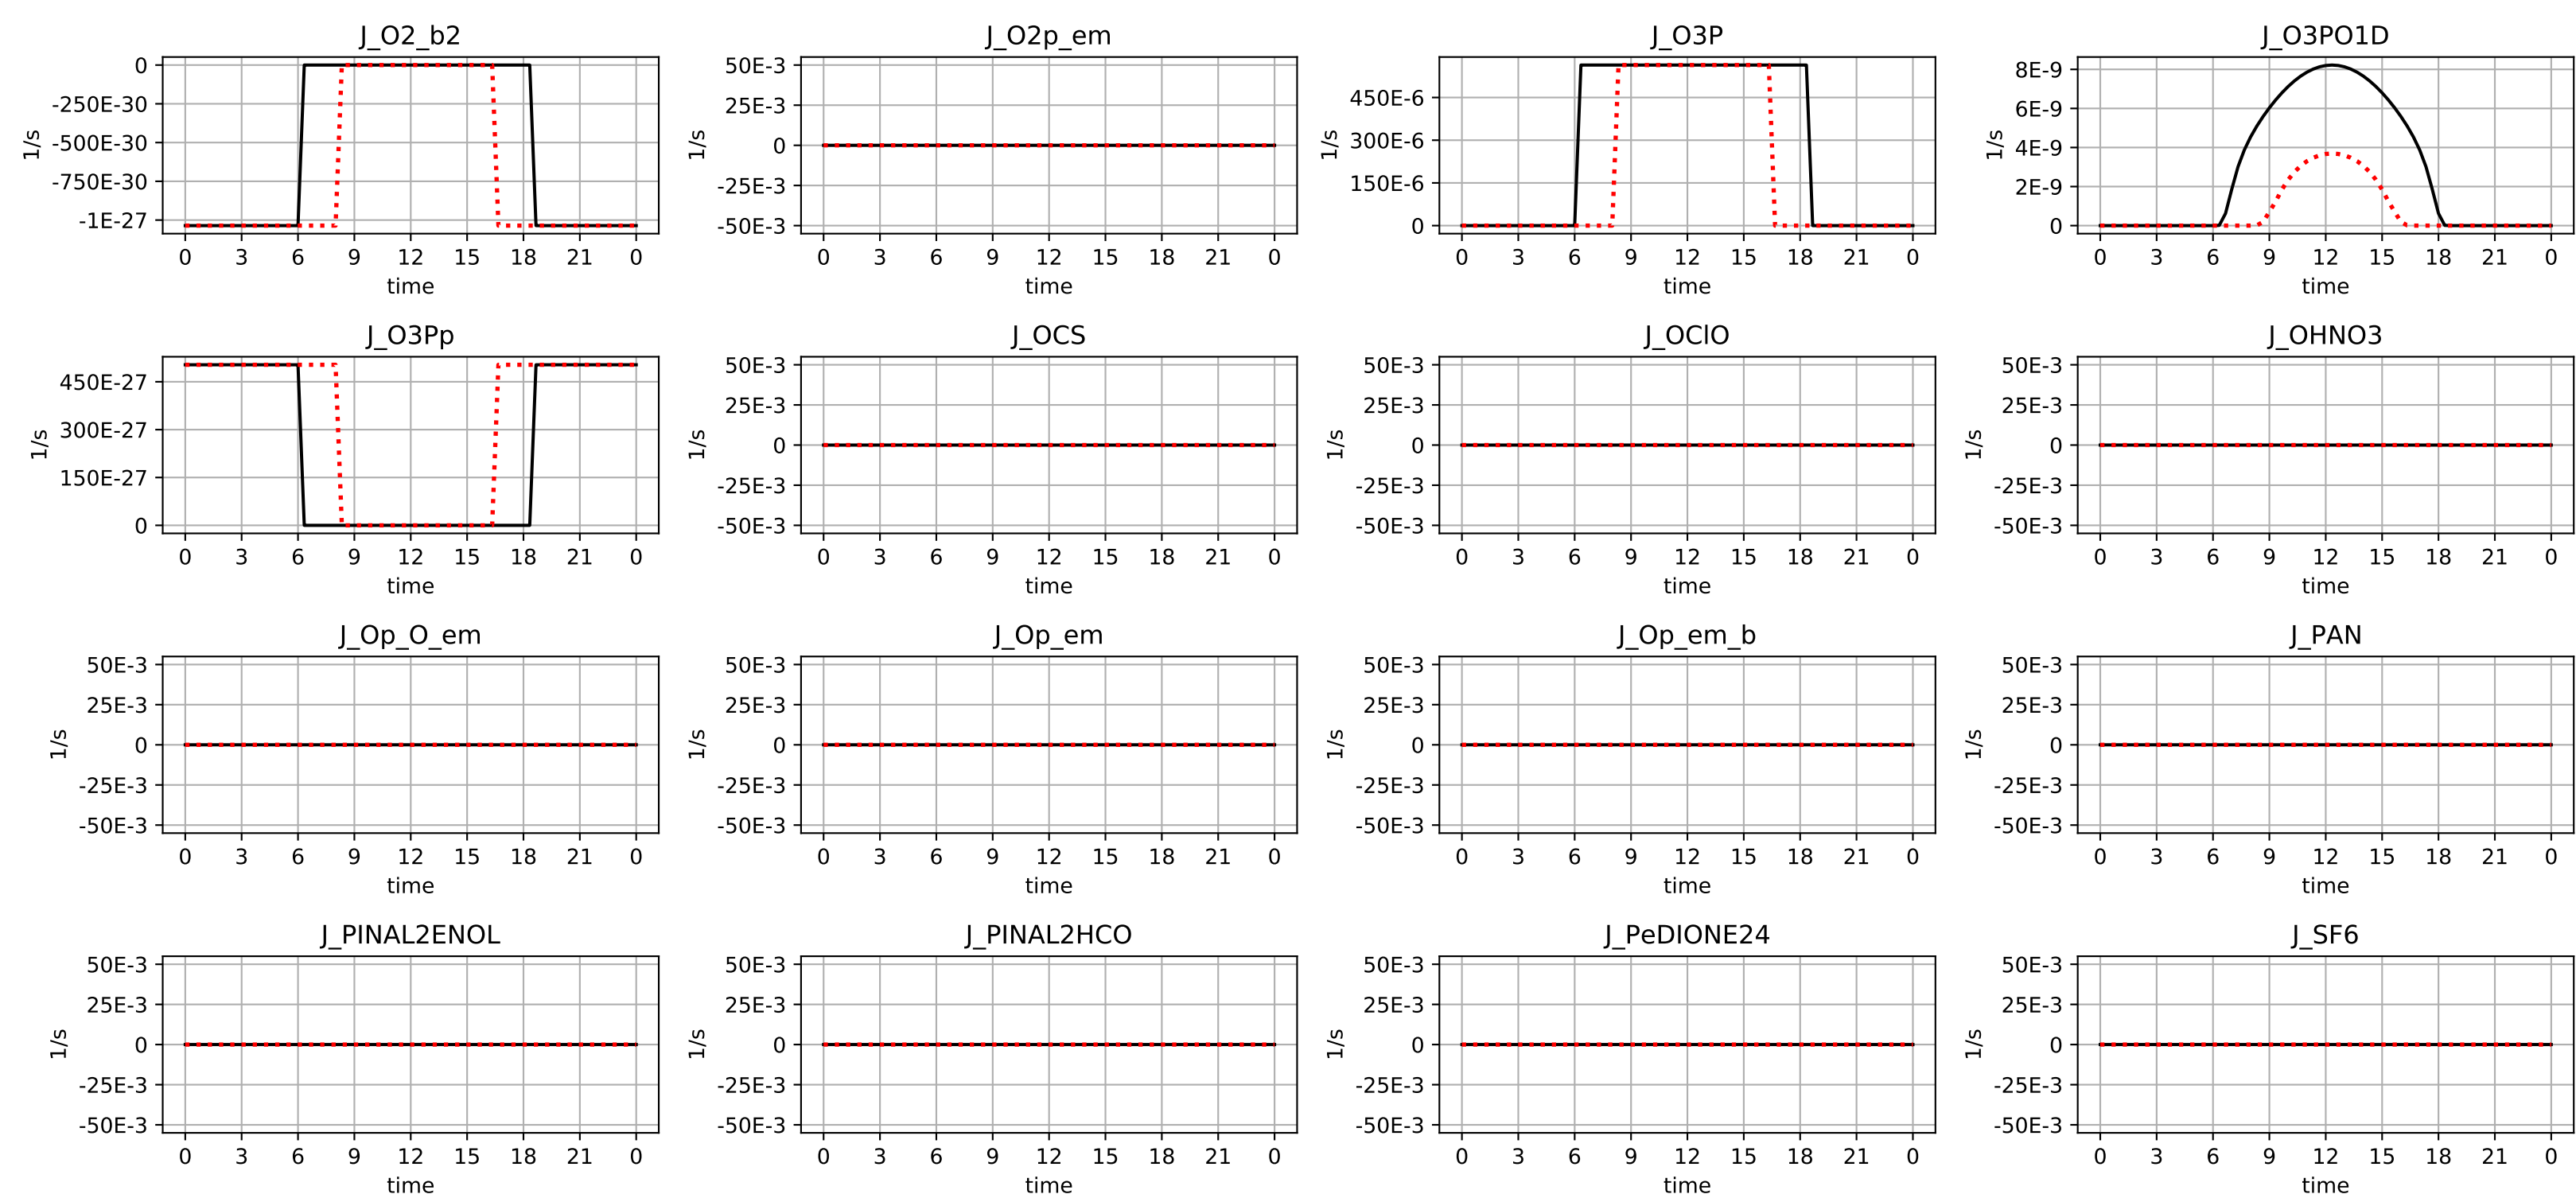



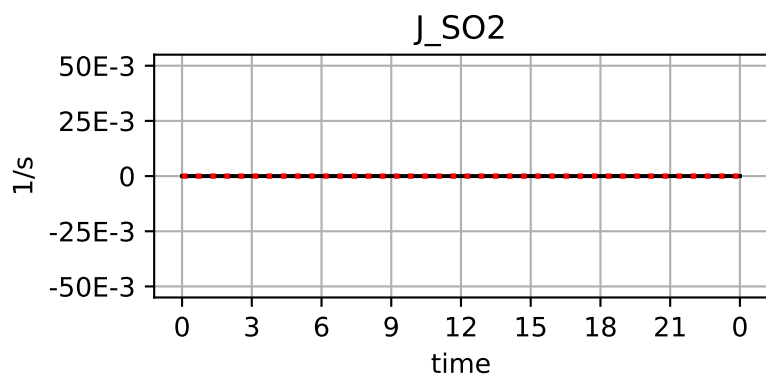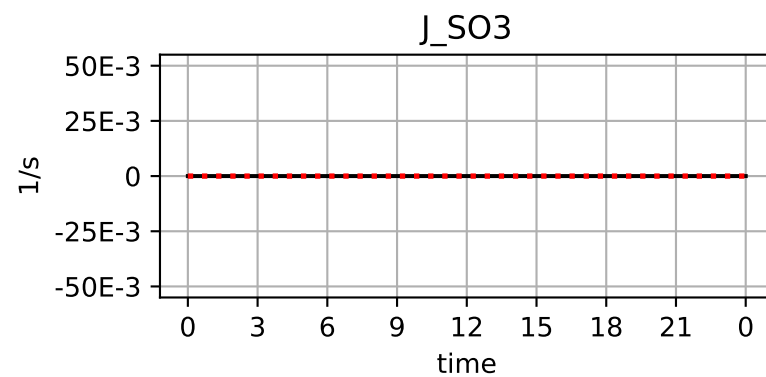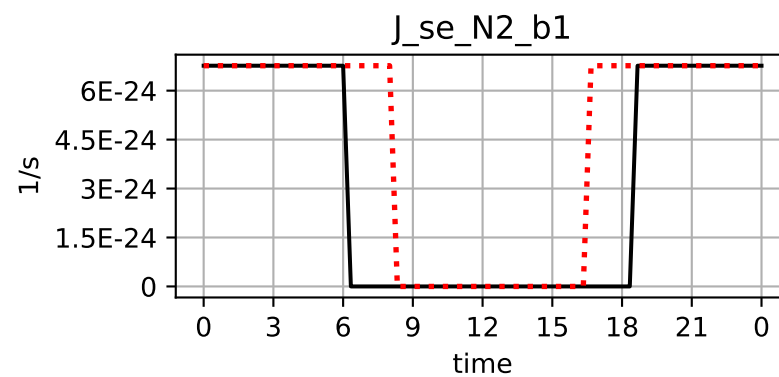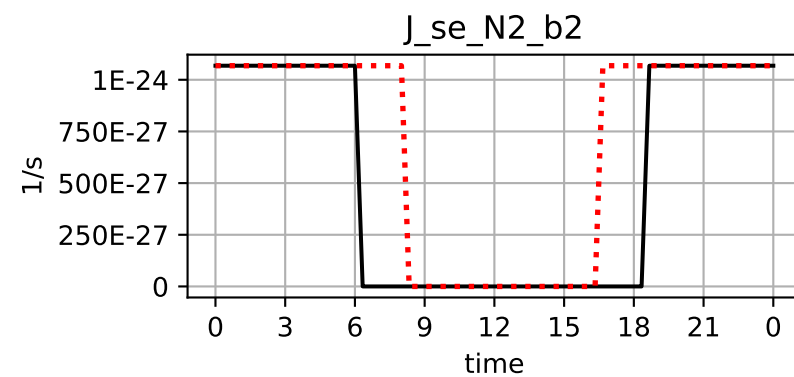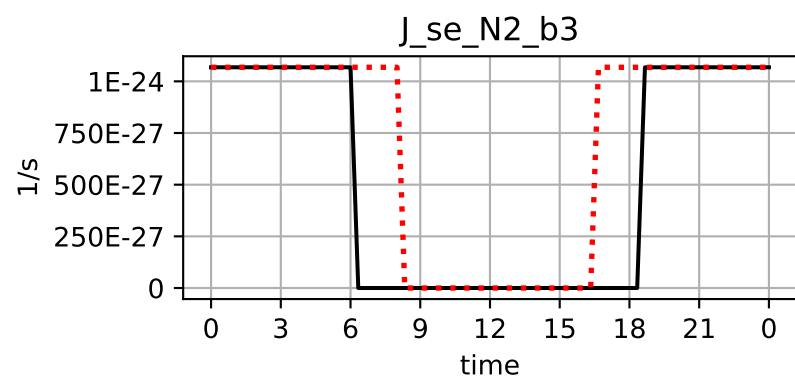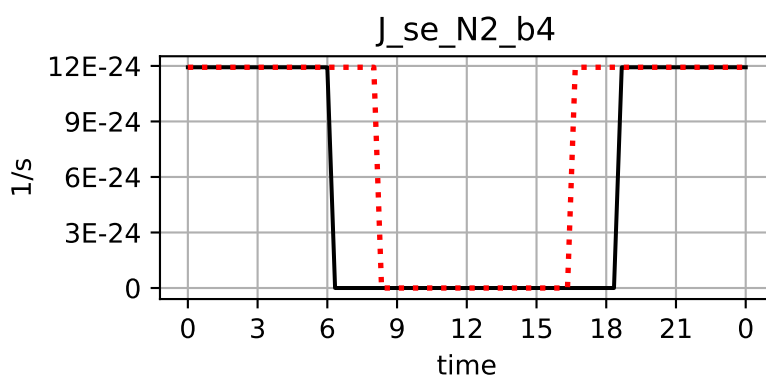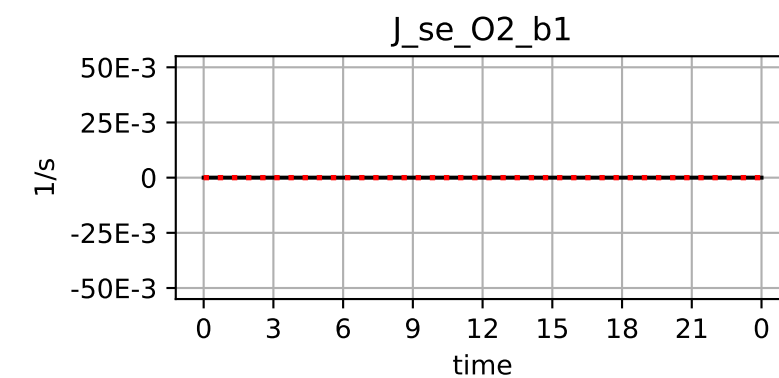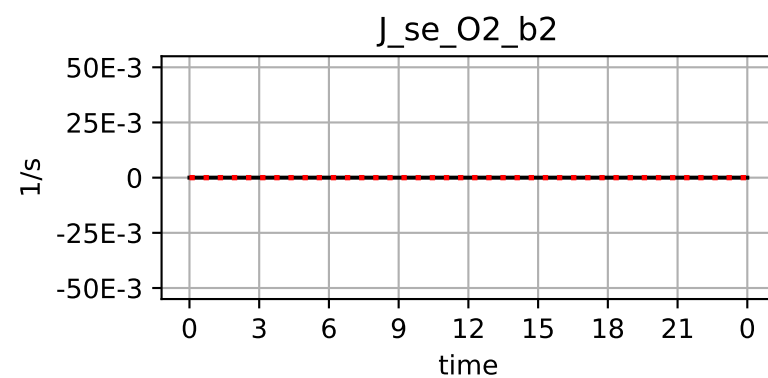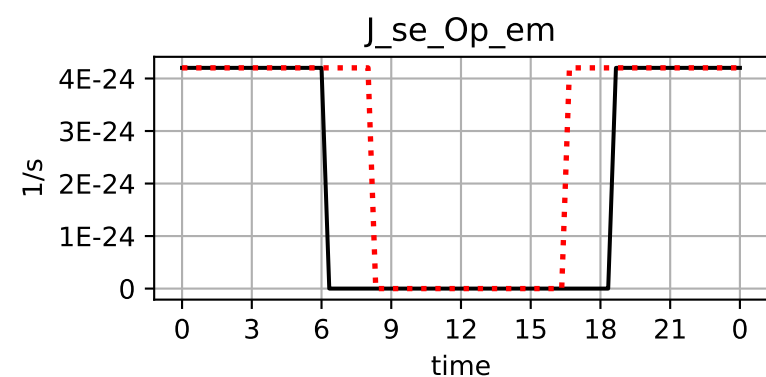

Supplement: Supplementary file 6 [file gmd-2020-337-supplement.zip]
