# Supplementary material for: Oxidation of low-molecular weight organic compounds in clouddroplets: development of the JAMOC chemical mechanism inCAABA/MECCA (version 4.5.0gmdd)
Source: Copernicus journal article supplement (doi:10.5194/gmd-2020-337), 2020-10-29

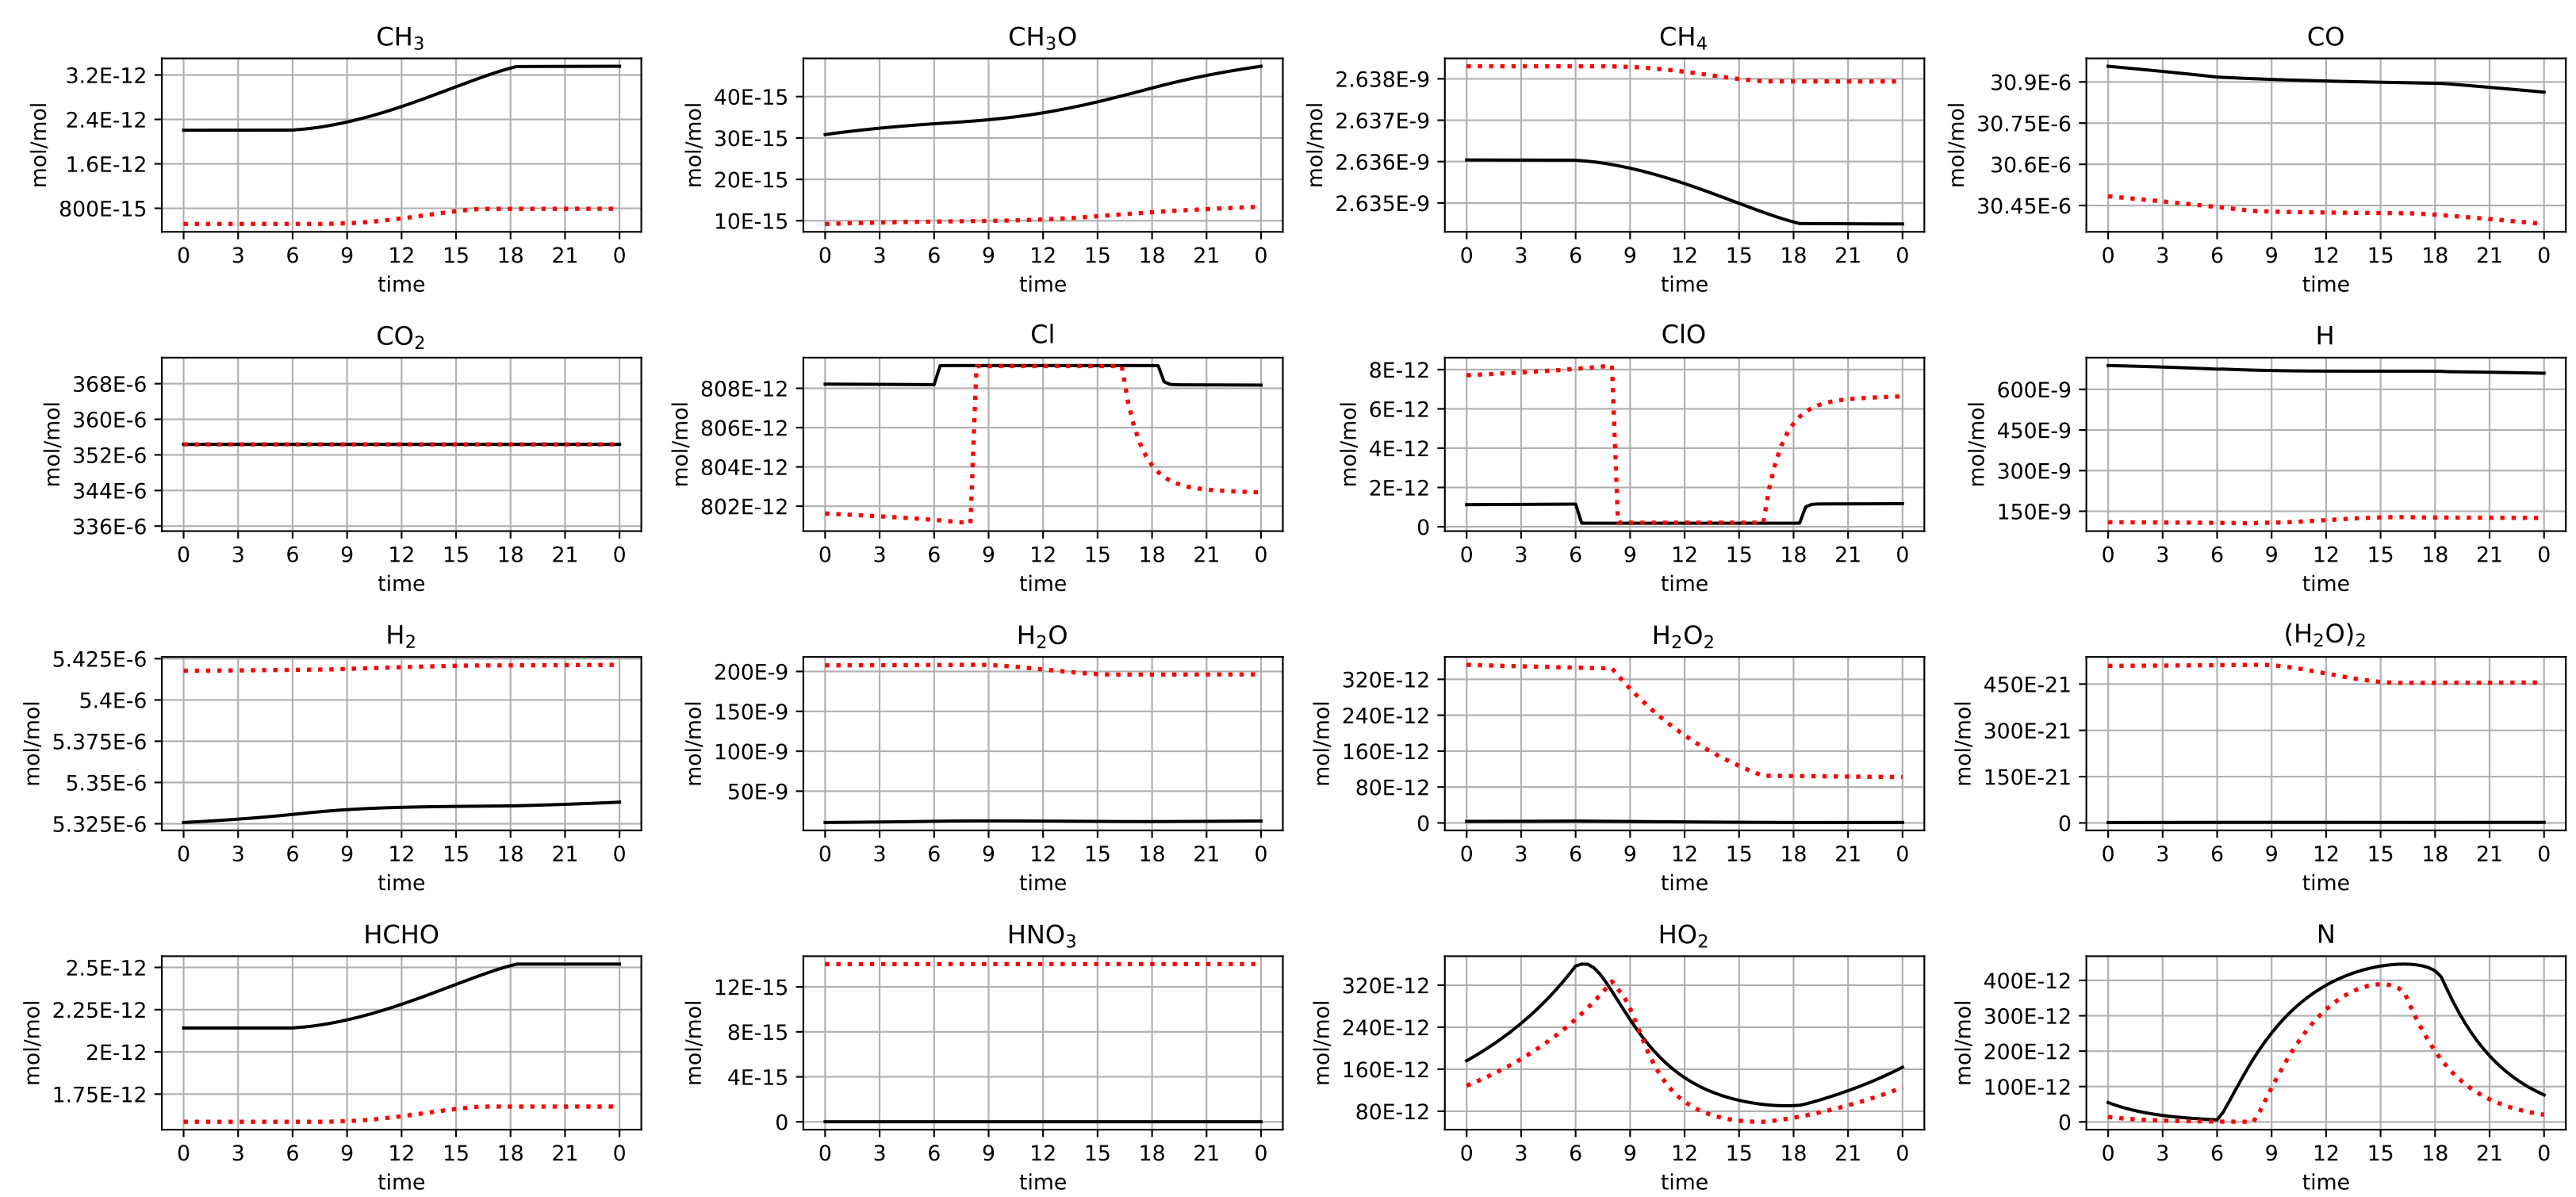

$\text{N}_2$ 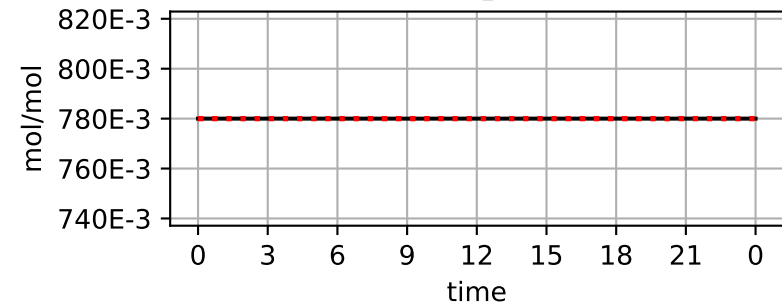 $\text{N}(^2\text{D})$ 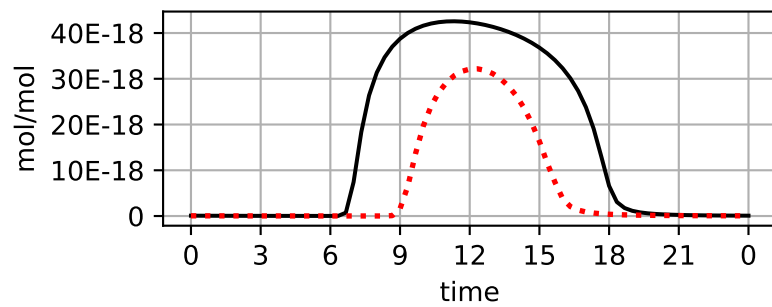 $\text{N}_2\text{O}$ 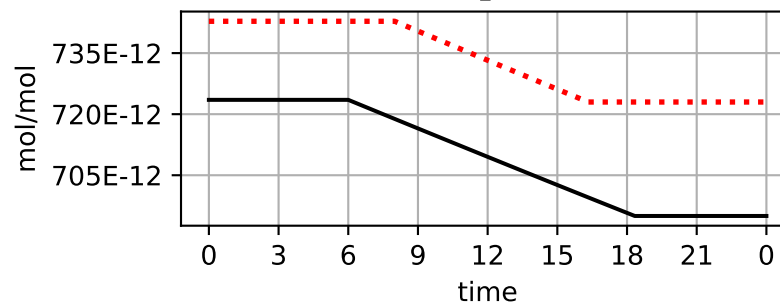 $\text{N}_2\text{O}_5$ 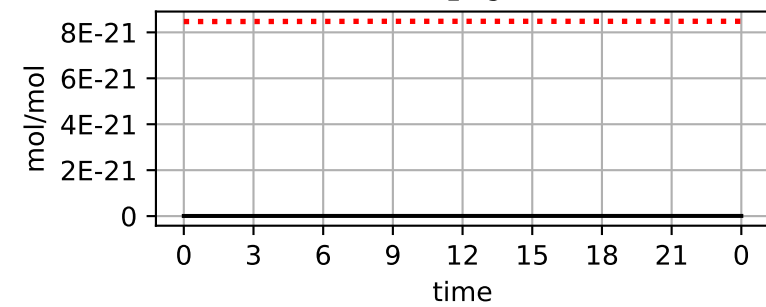 $\text{N}_2^+$ 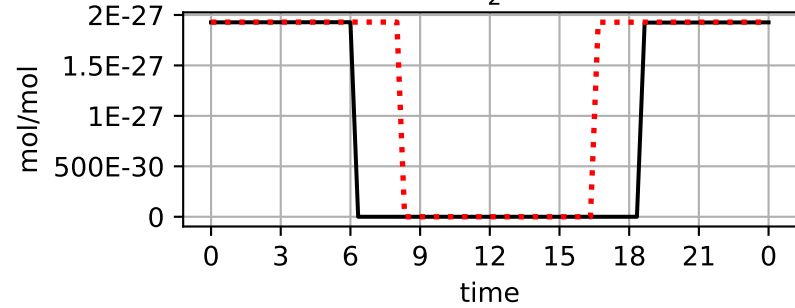 $\text{NO}$ 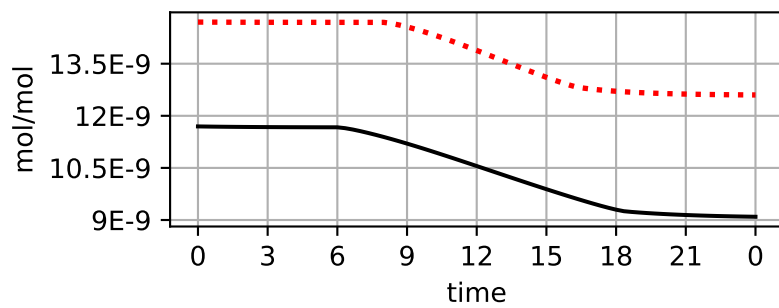 $\text{NO}_2$ 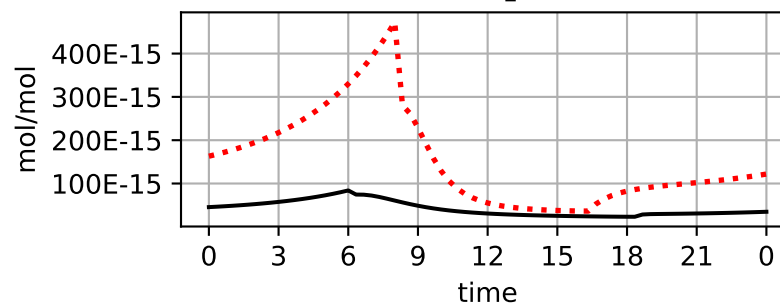 $\text{NO}_3$ 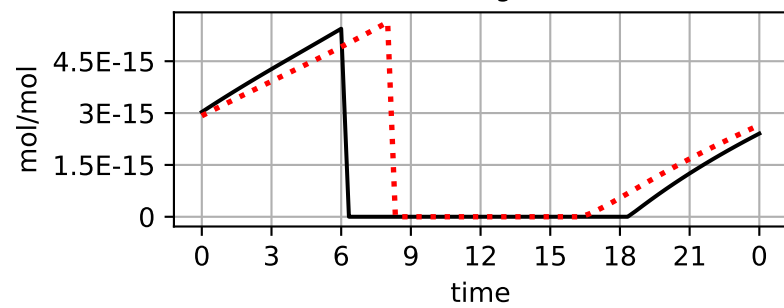 $\text{NO}^+$ 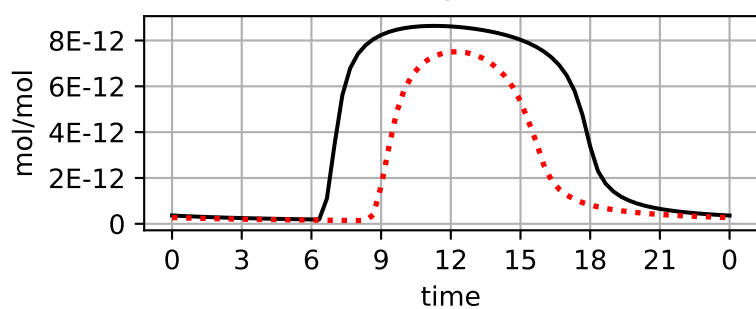 $\text{N}^+$ 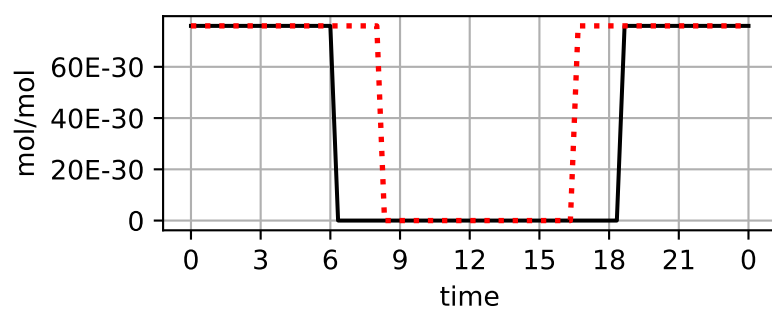 $\text{O}(^1\text{D})$ 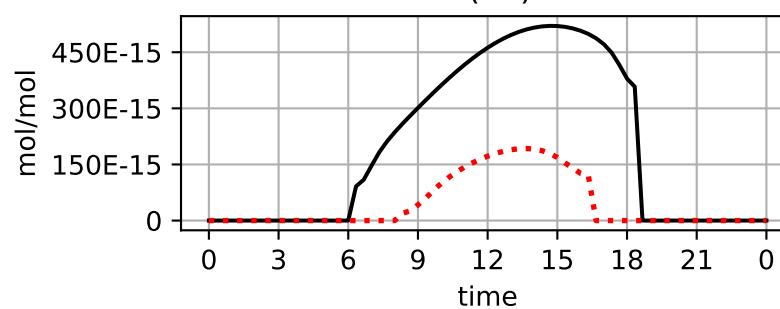 $\text{O}_2$ 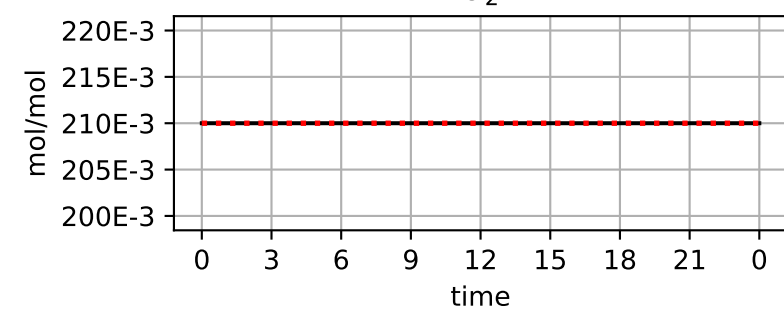 $\text{O}_2^+$ 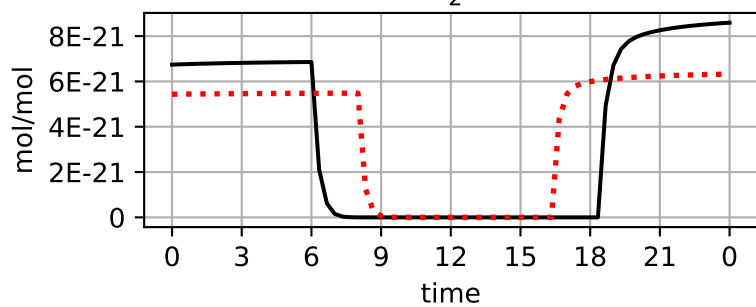 $\text{O}_3$ 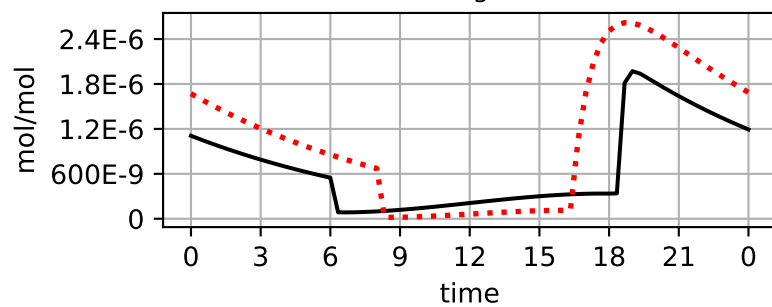 $\text{O}(^3\text{P})$ 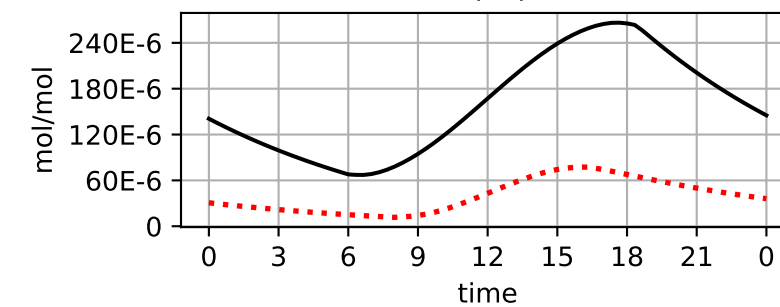 $\text{OH}$ 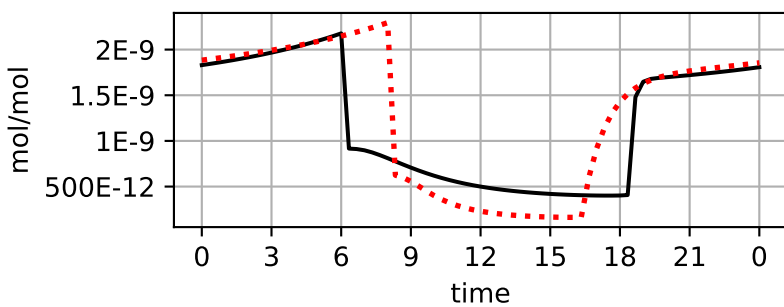

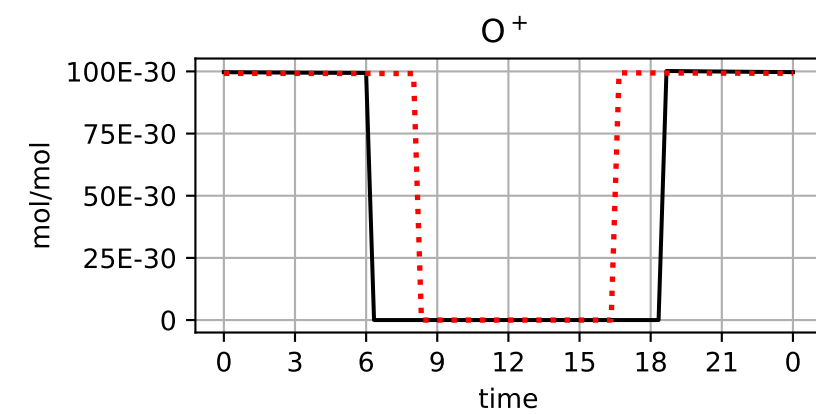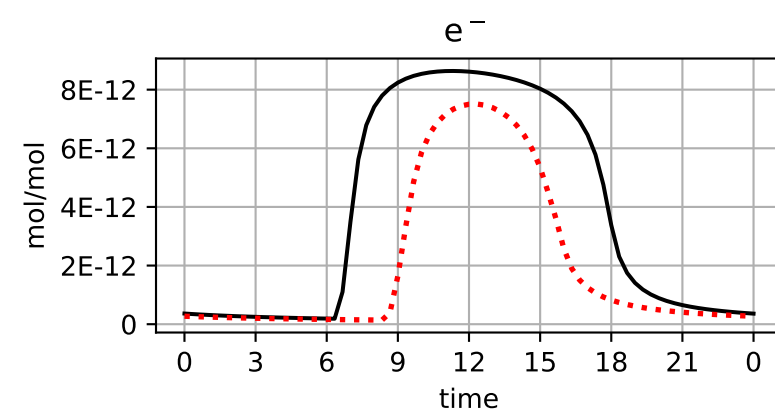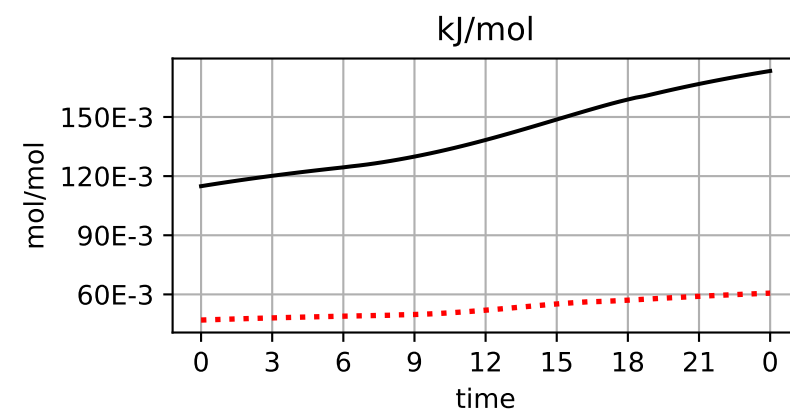

Supplement: Supplementary file 15 [file gmd-2020-337-supplement.zip]
