# Supplementary material for: Oxidation of low-molecular weight organic compounds in clouddroplets: development of the JAMOC chemical mechanism inCAABA/MECCA (version 4.5.0gmdd)
Source: Copernicus journal article supplement (doi:10.5194/gmd-2020-337), 2020-10-29

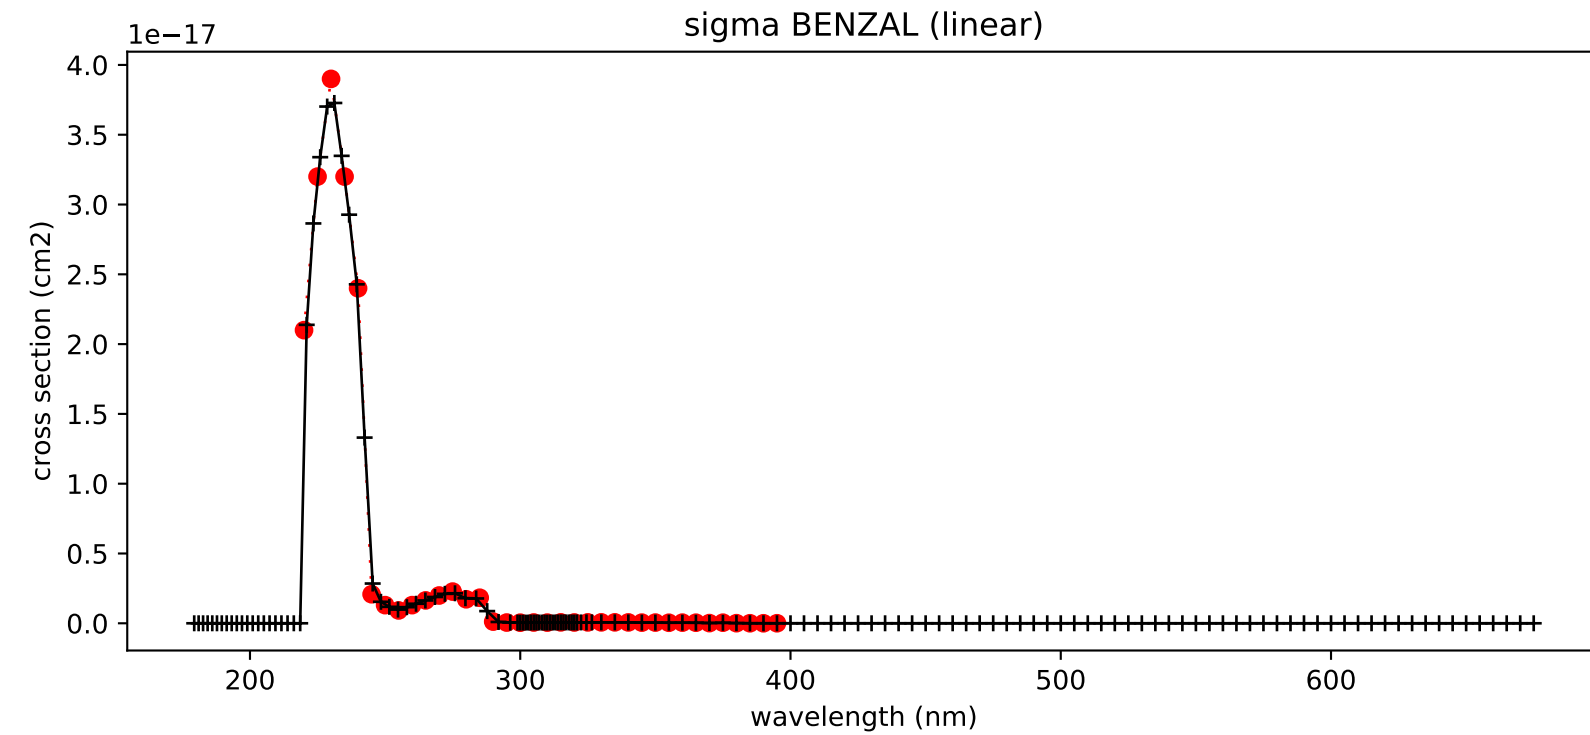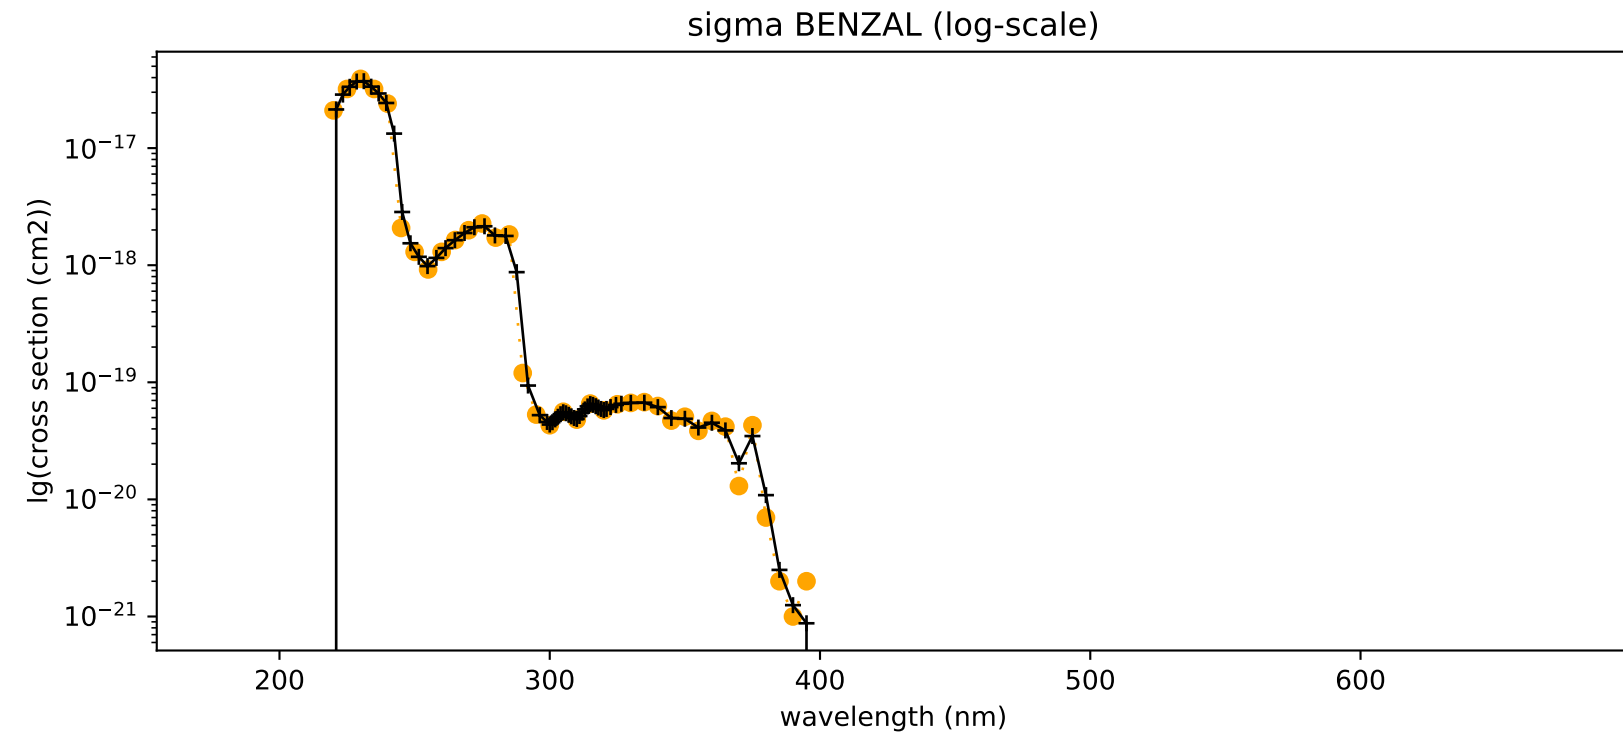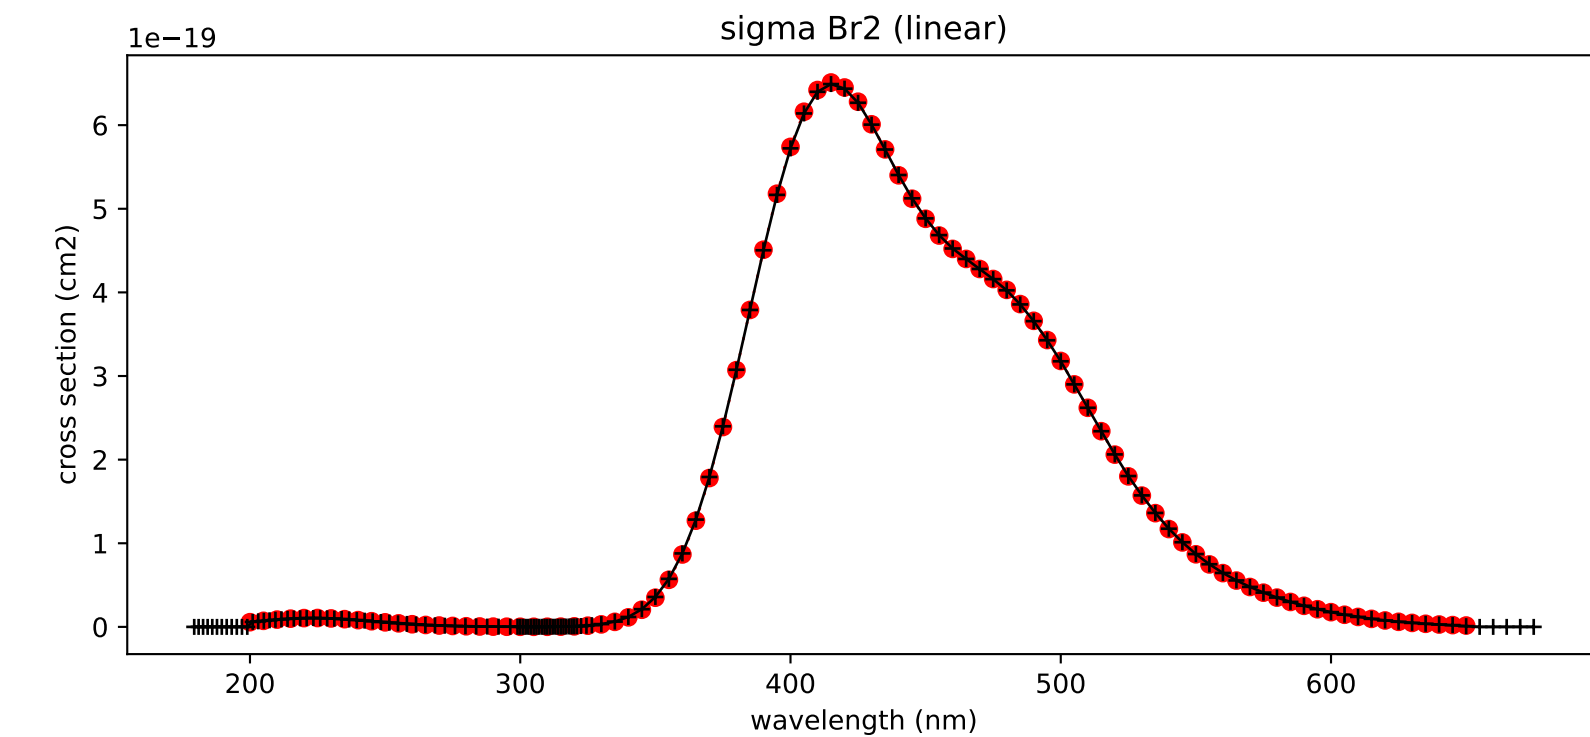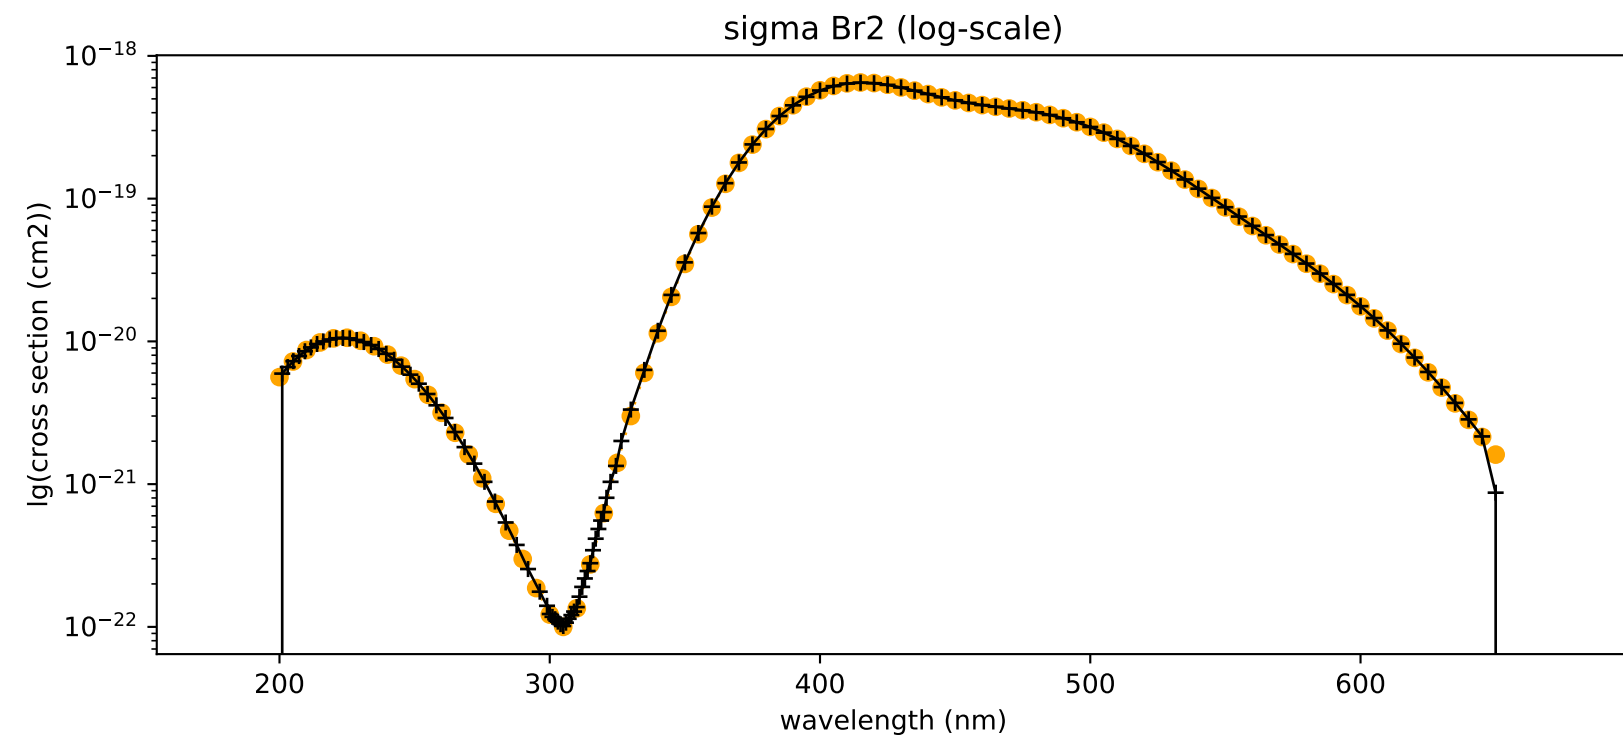

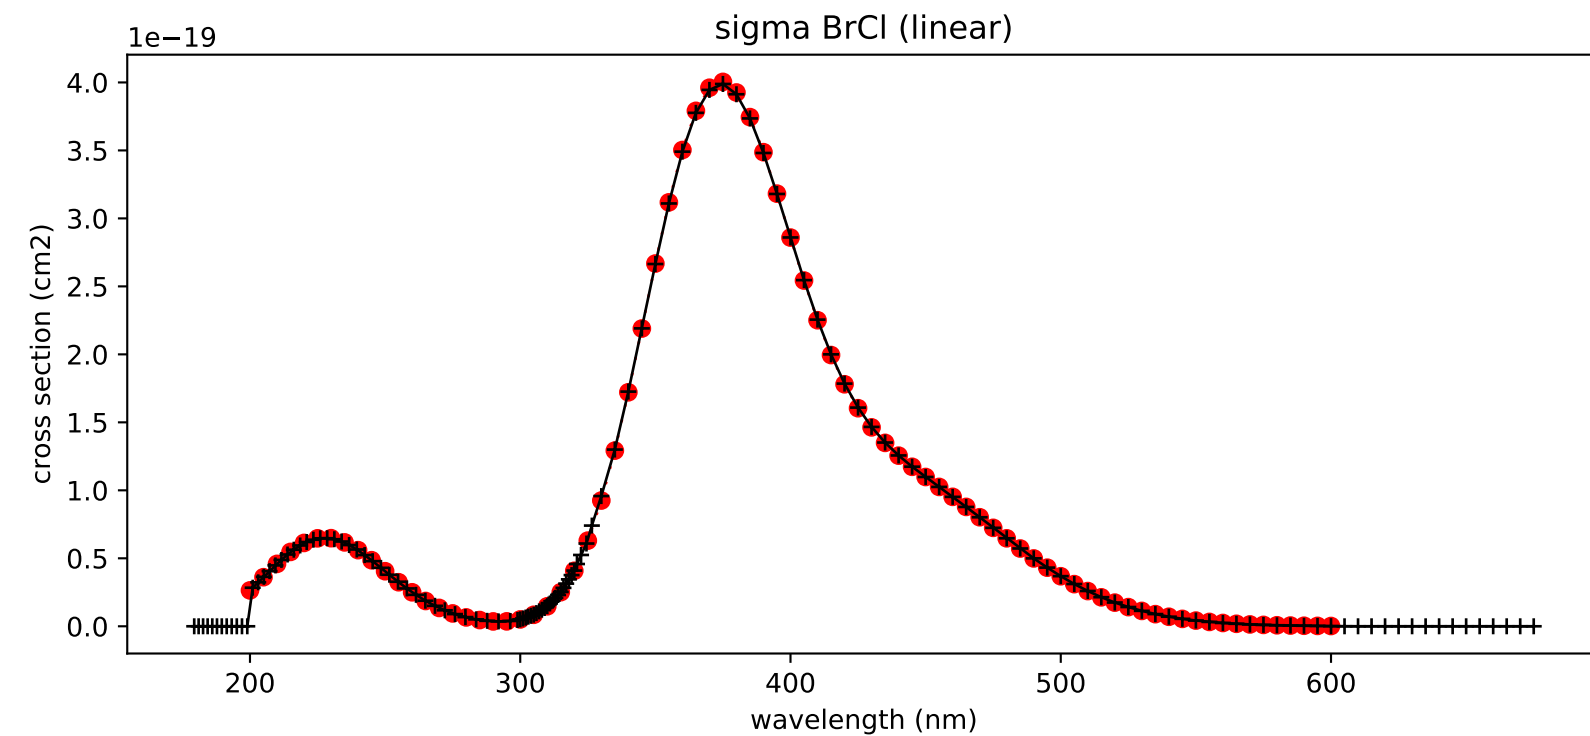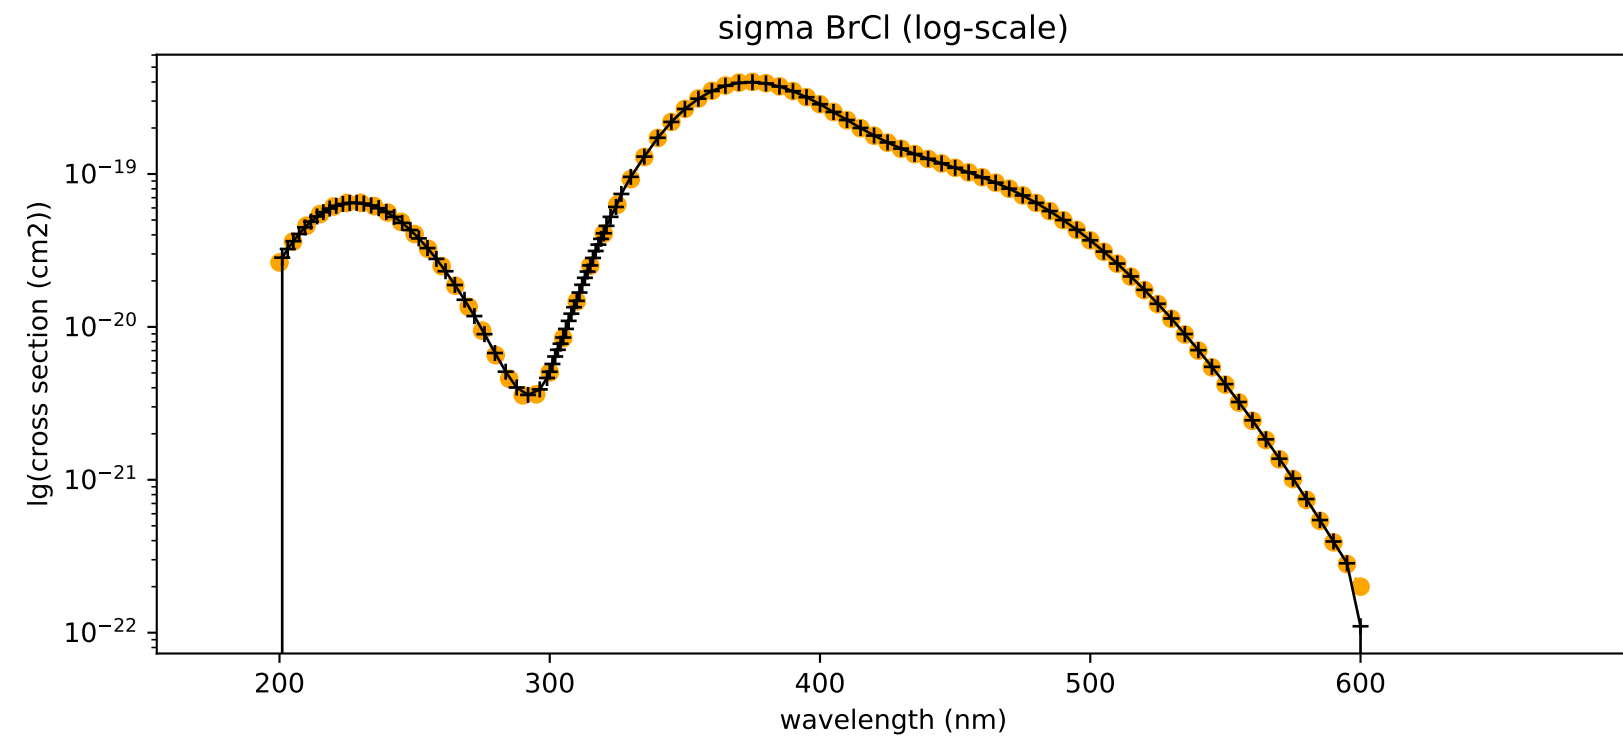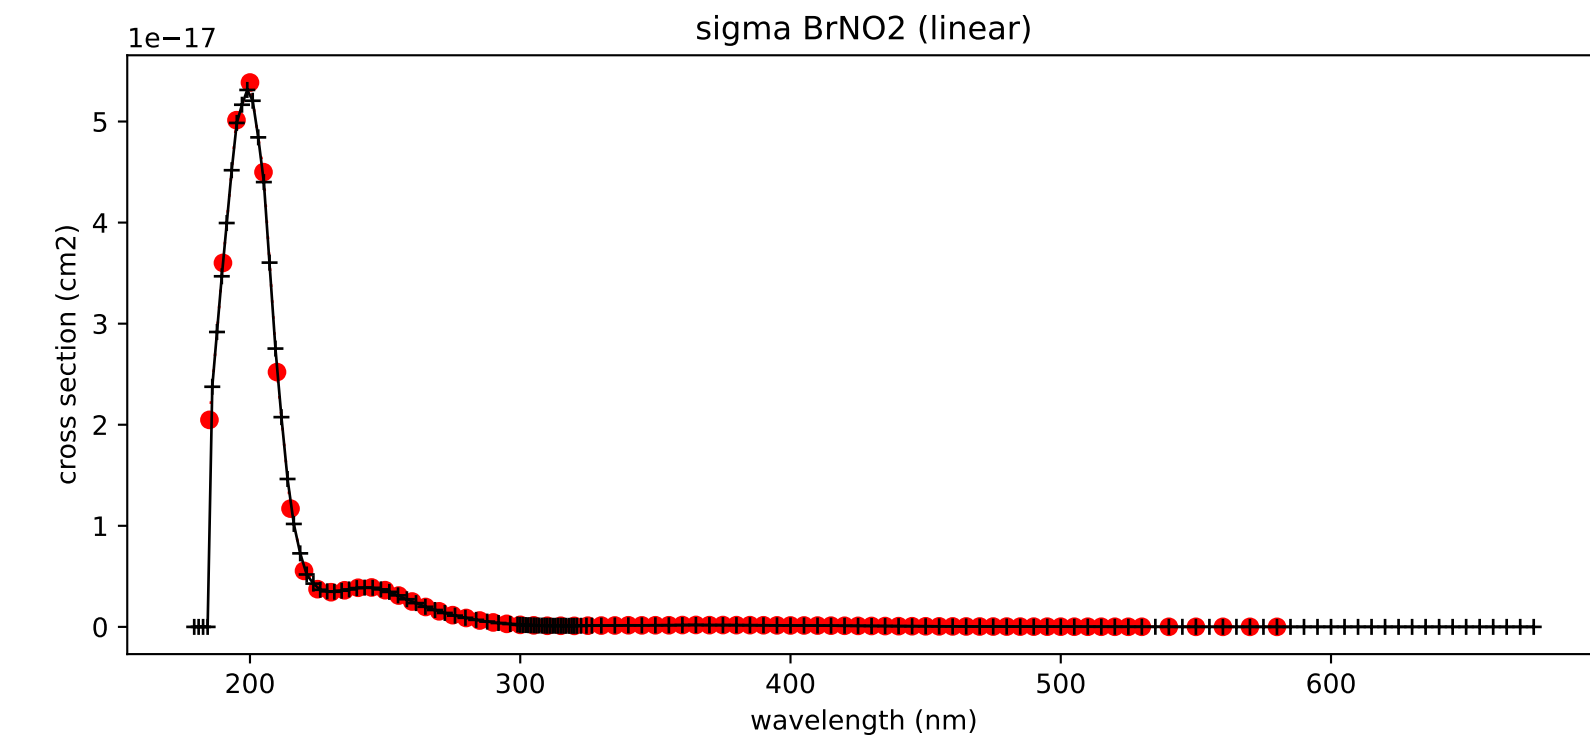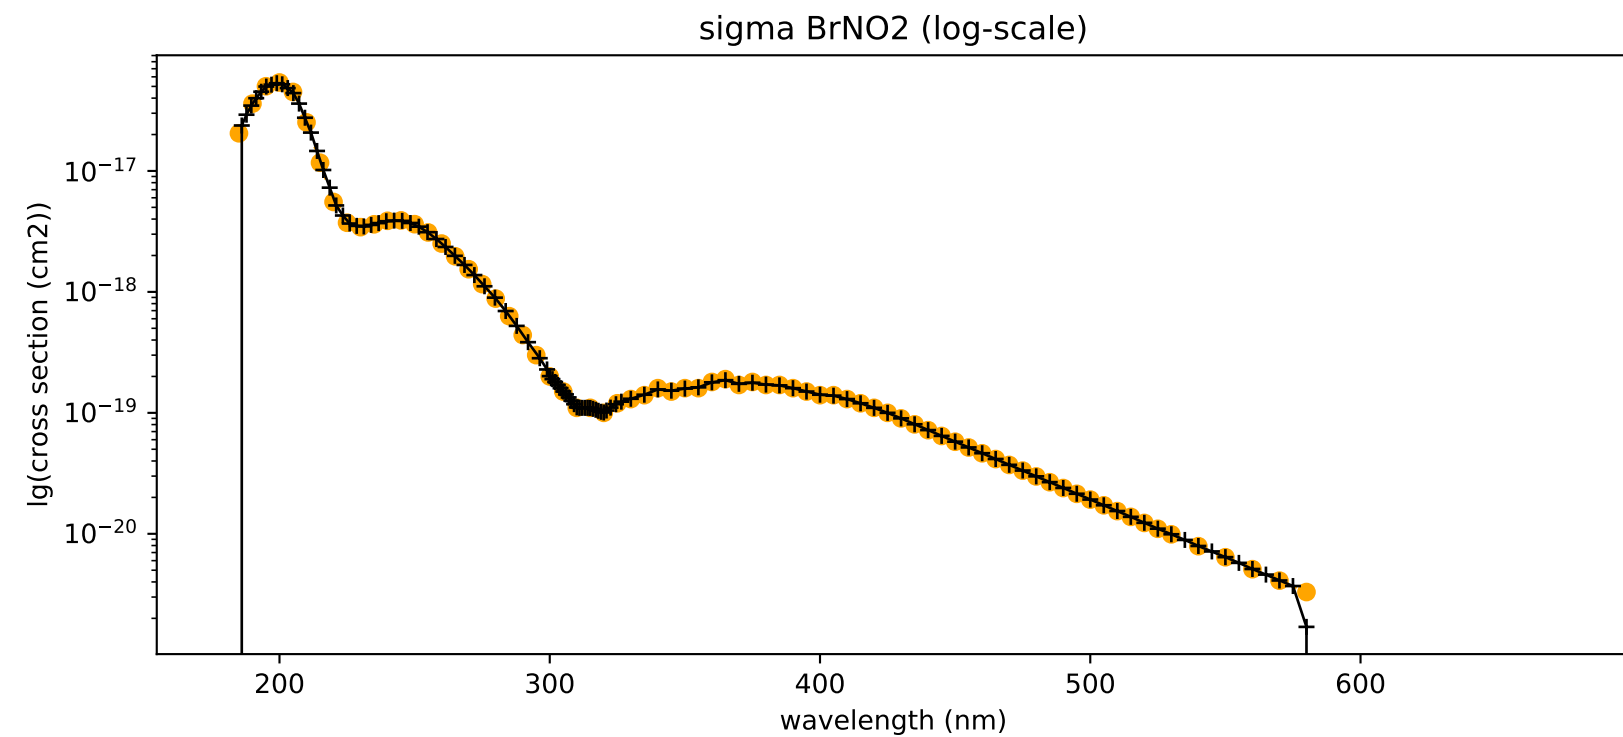

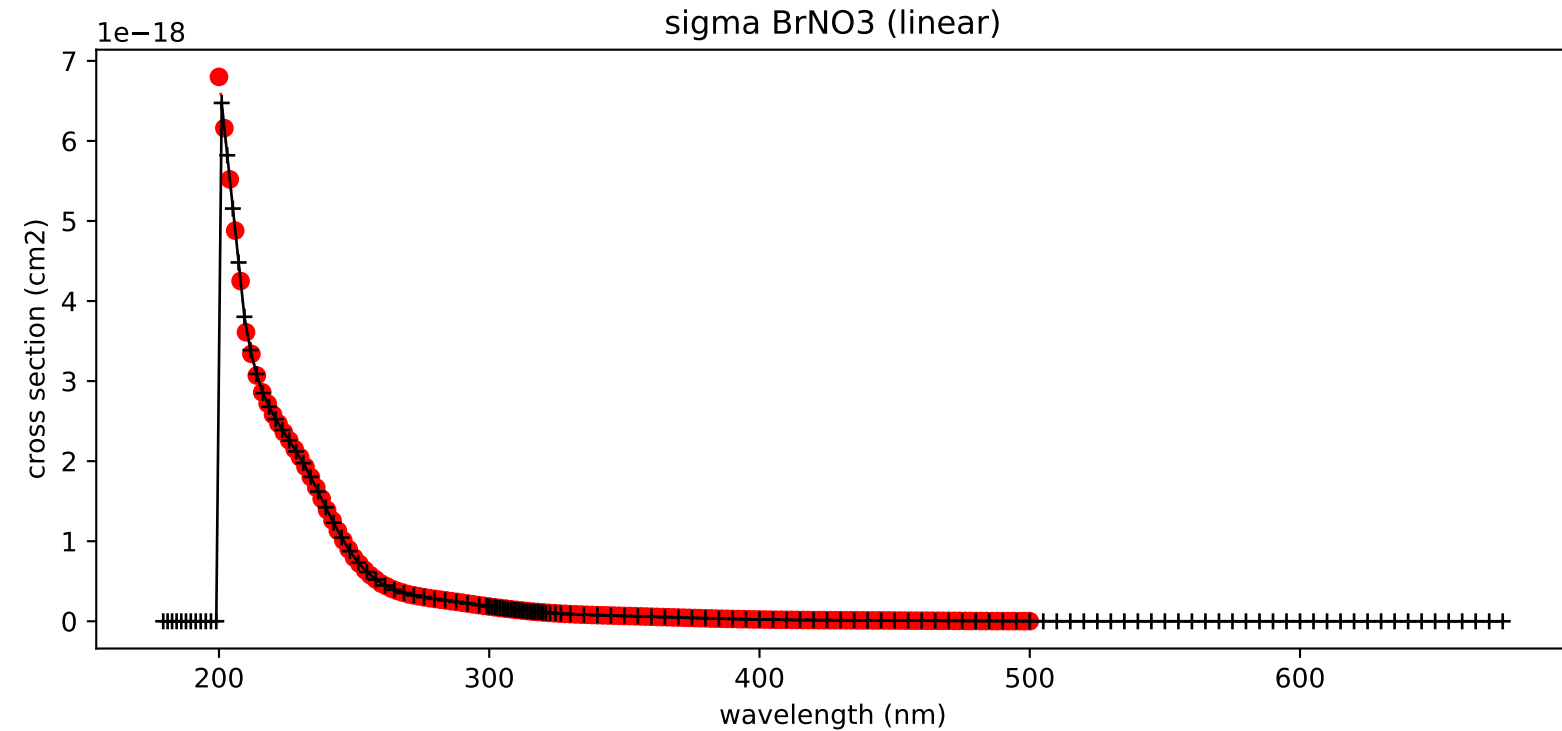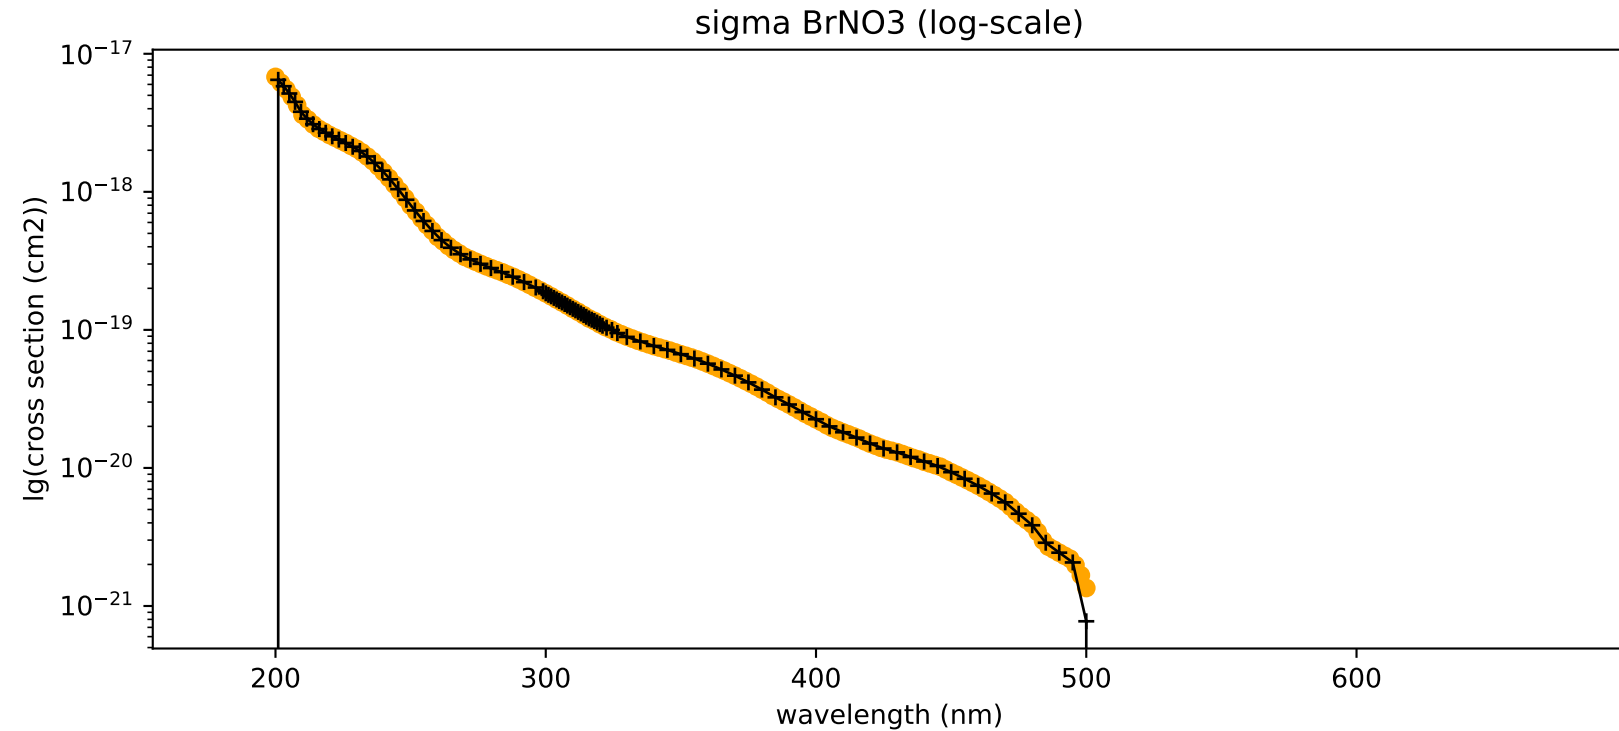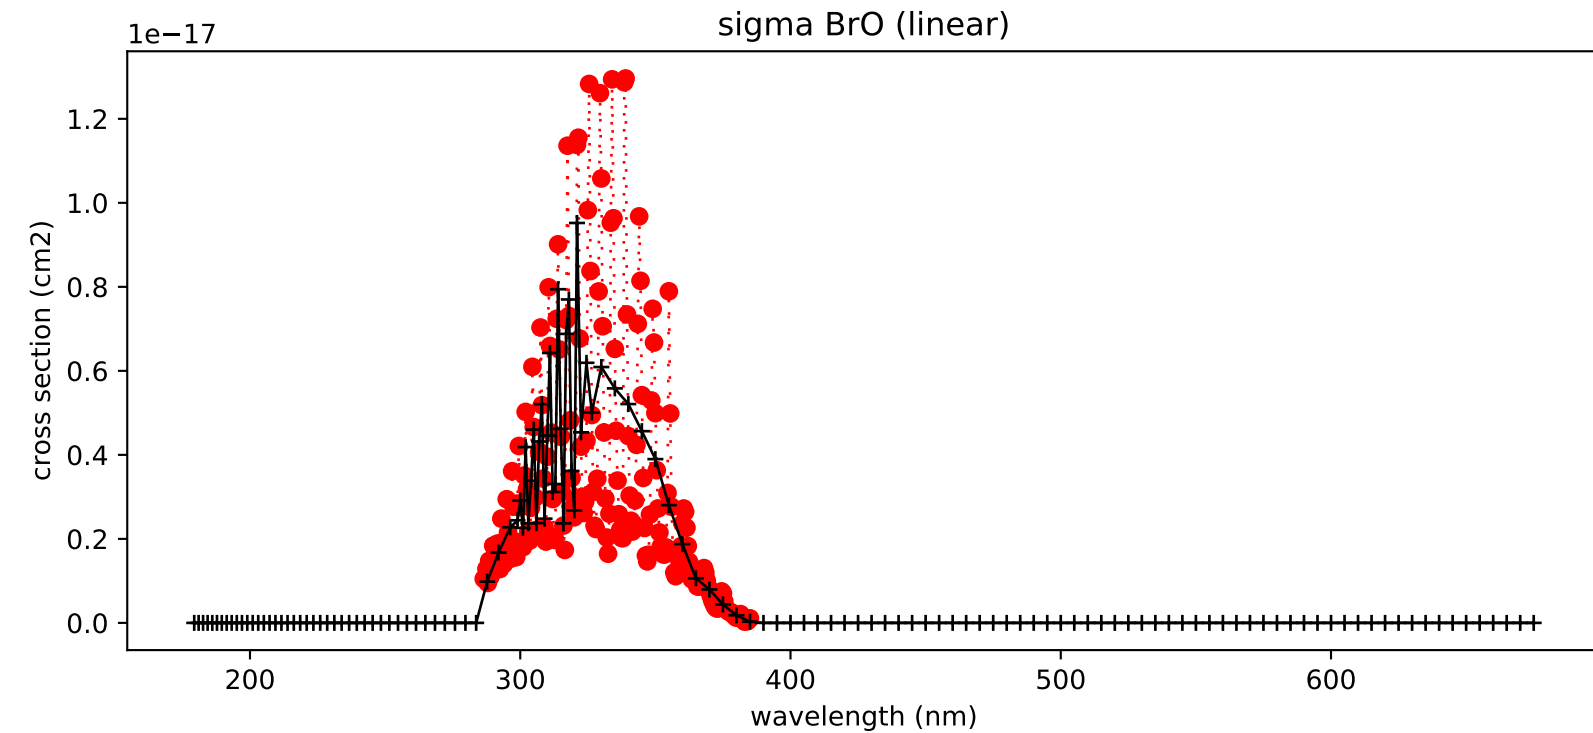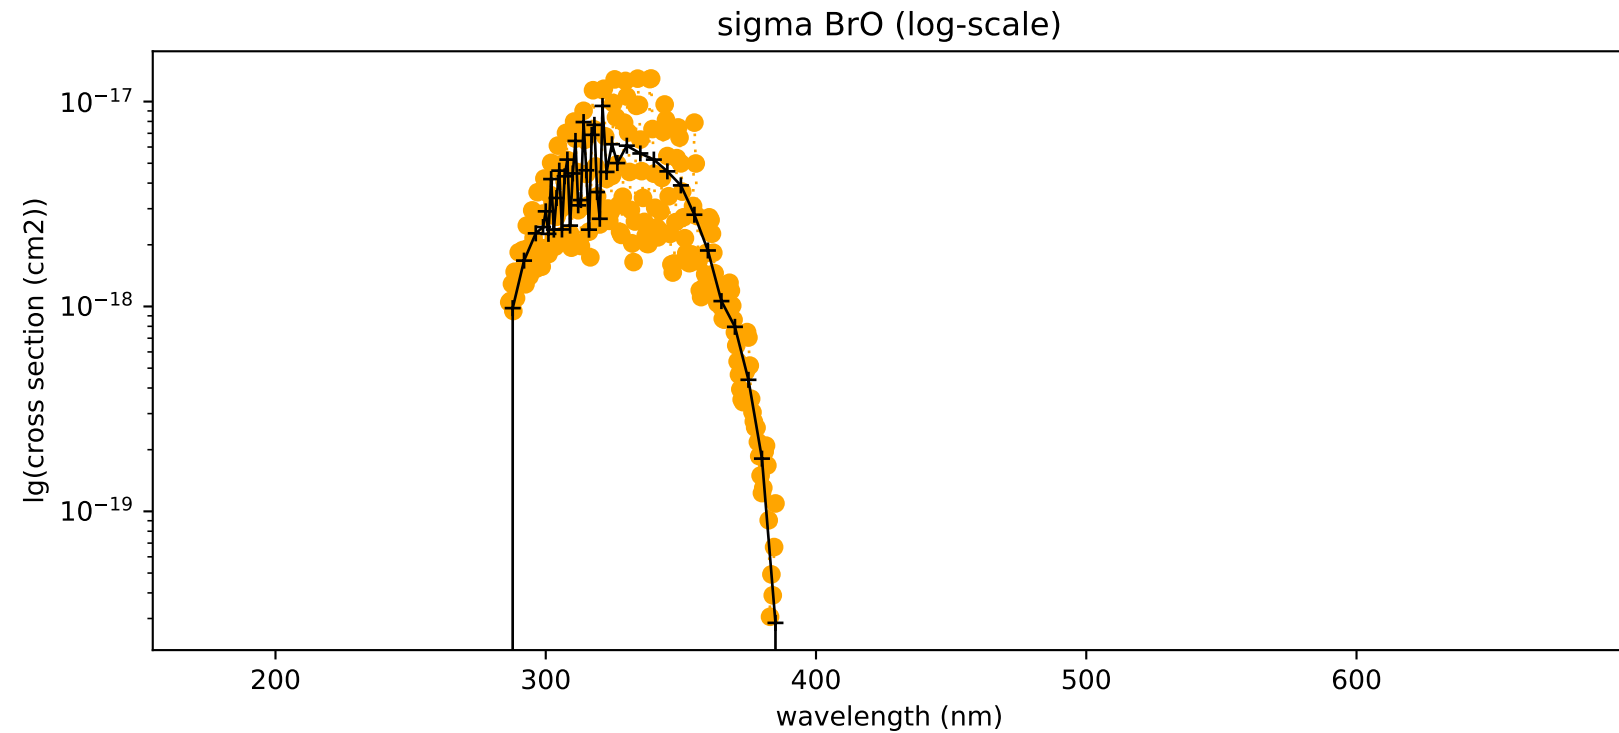

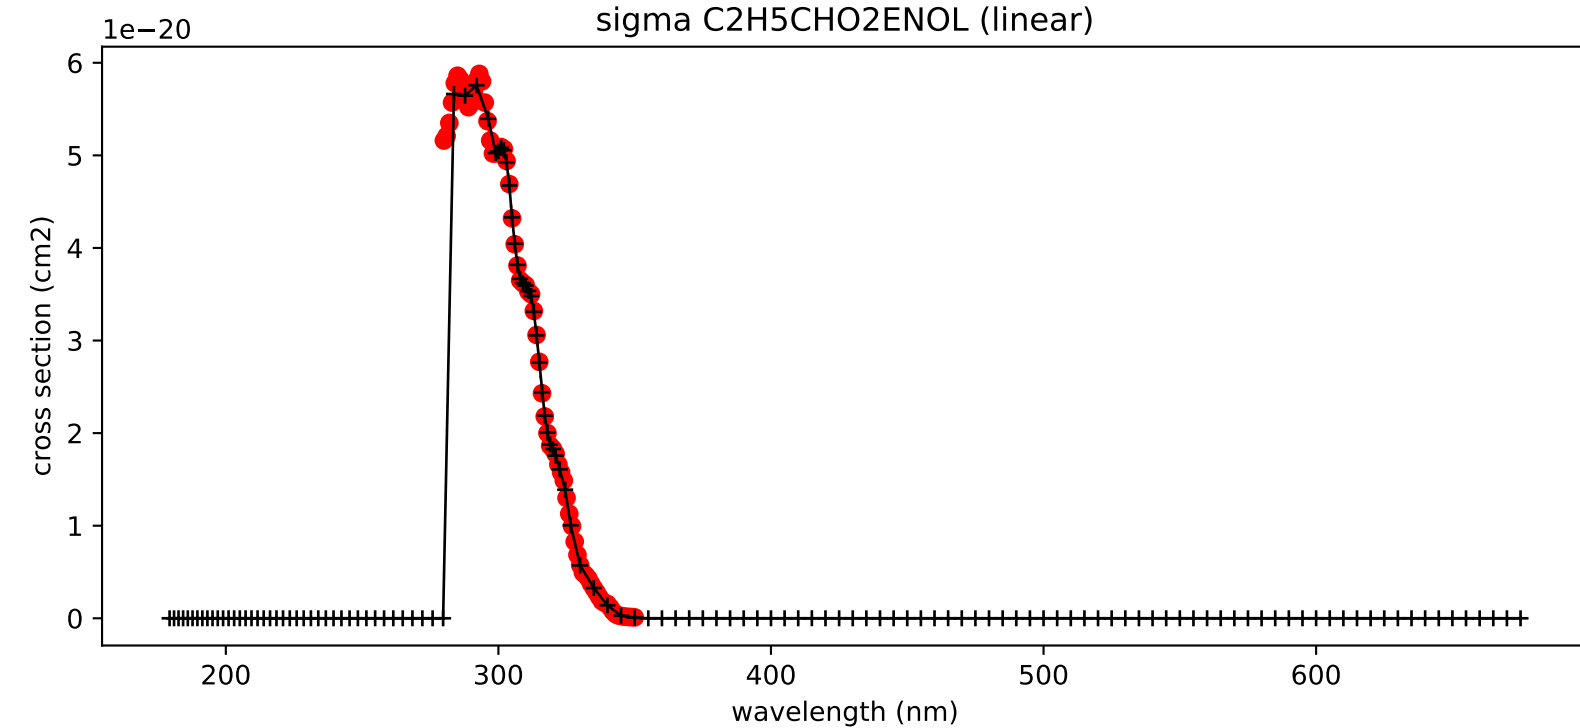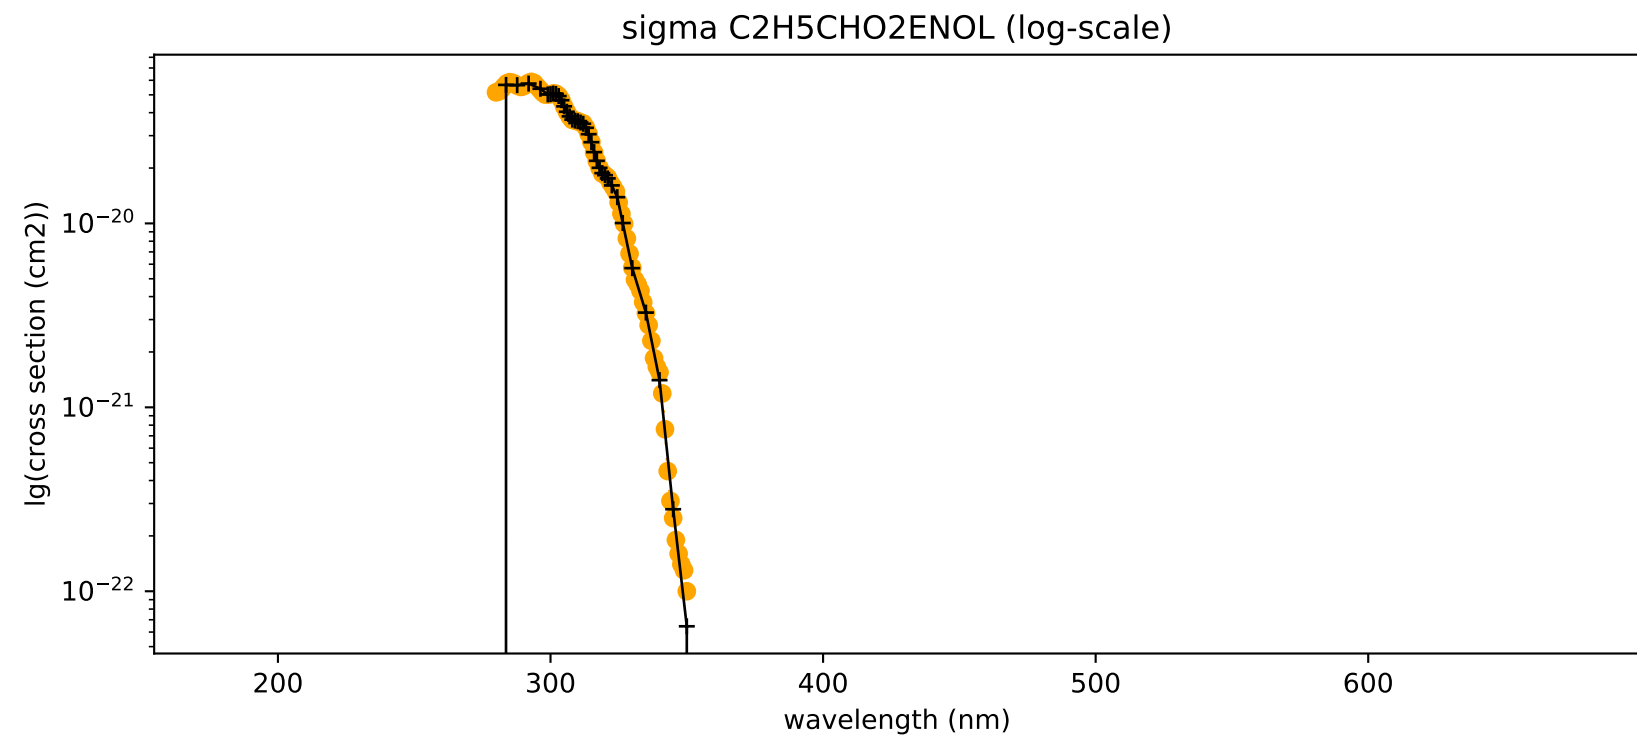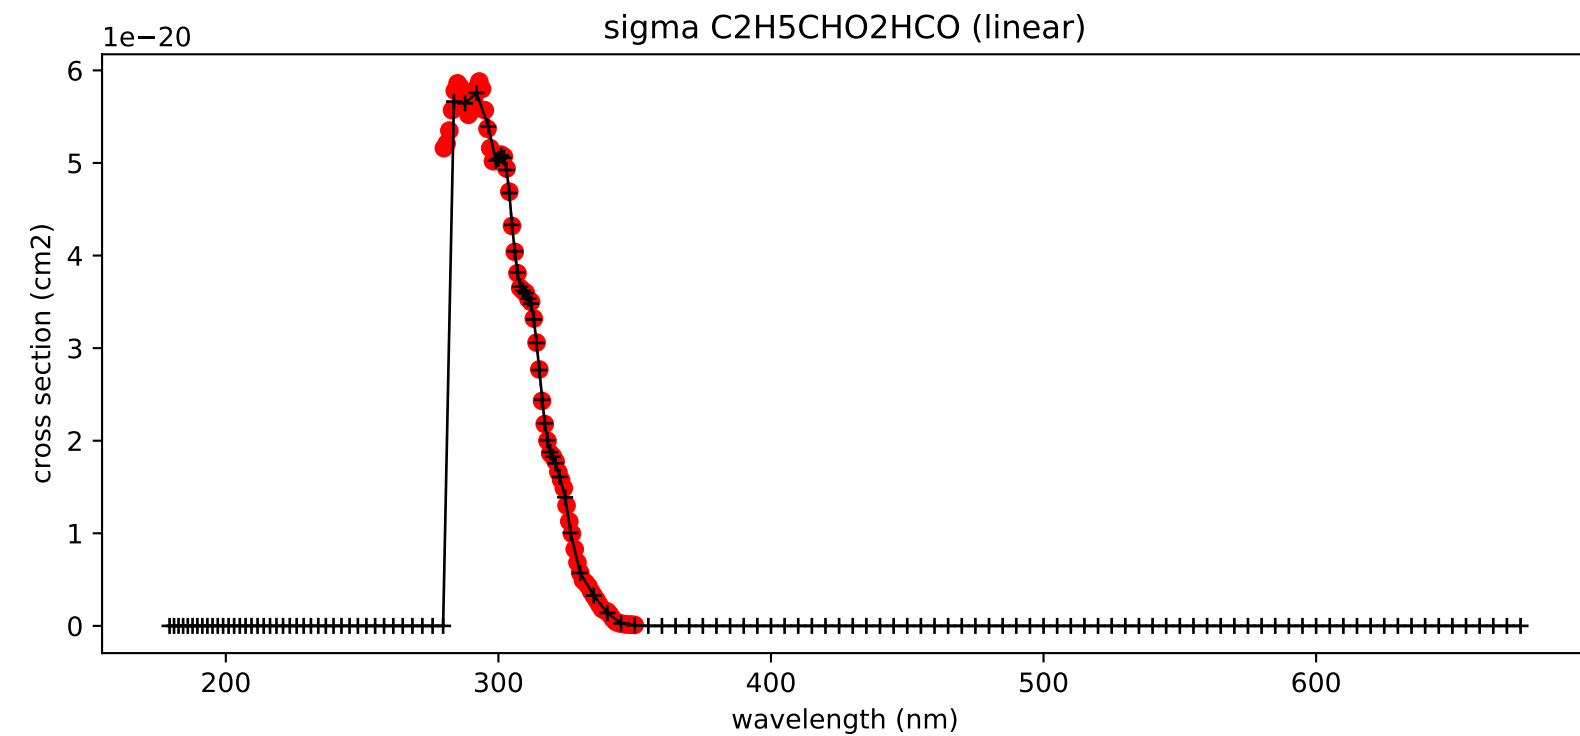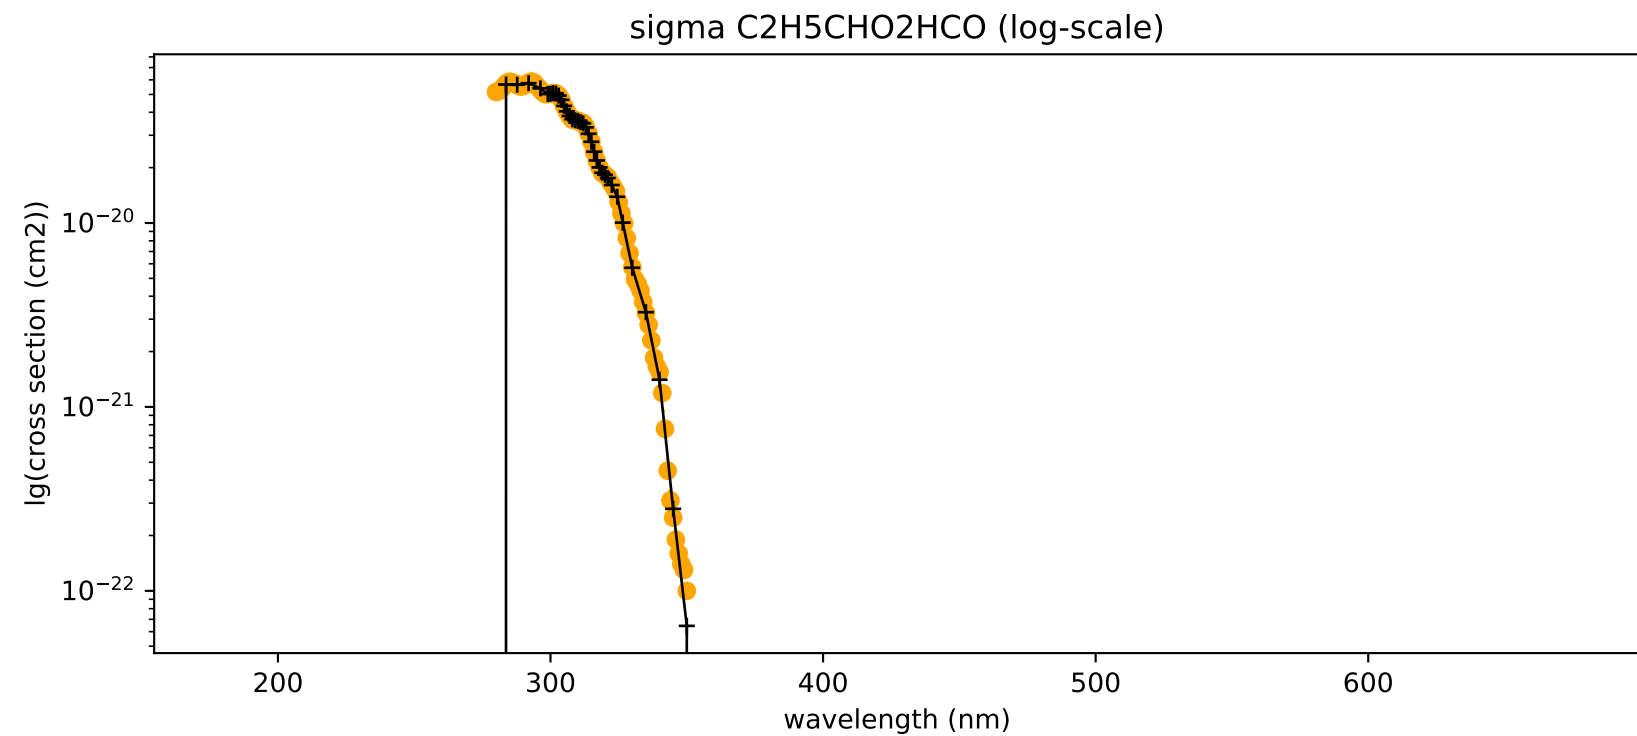

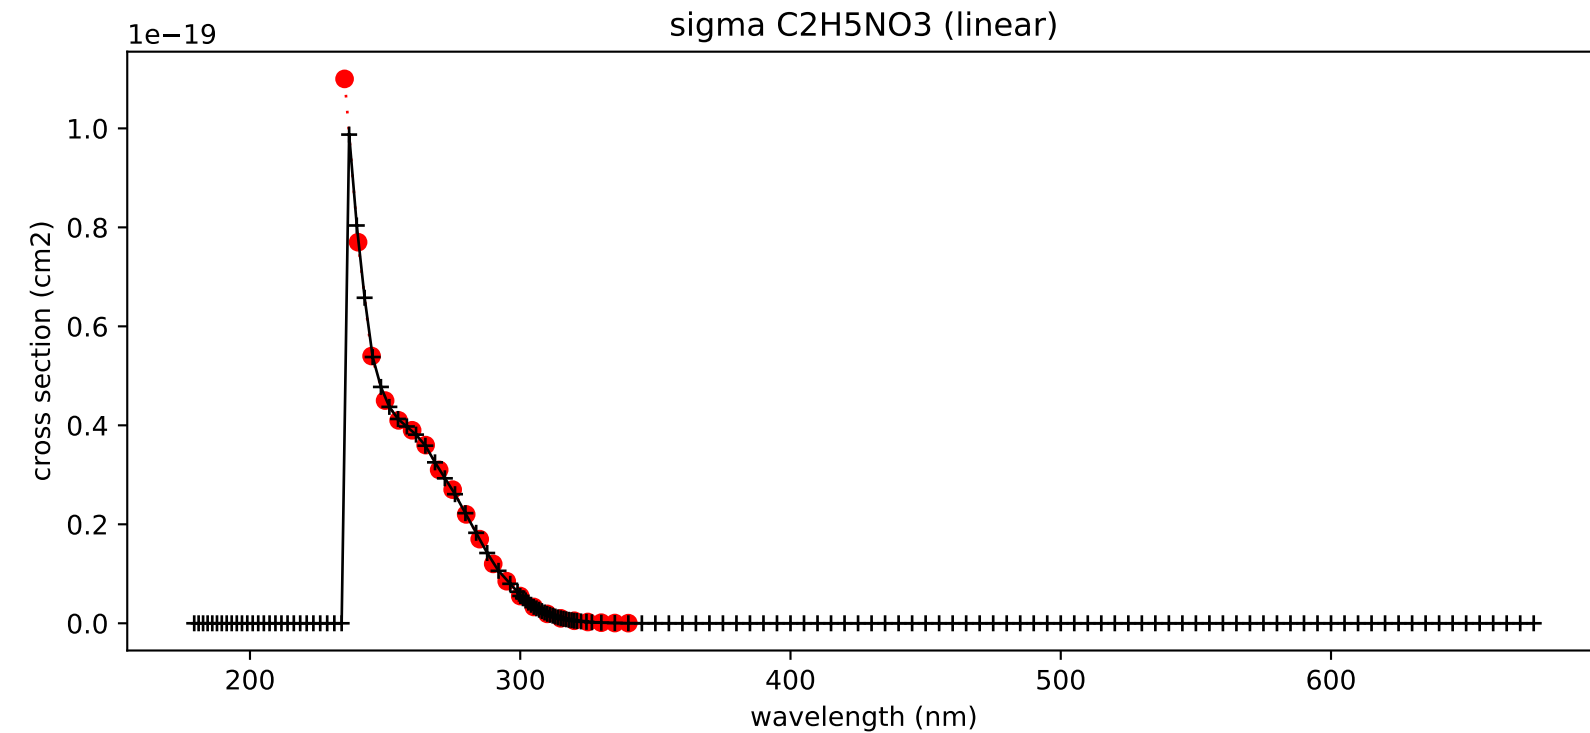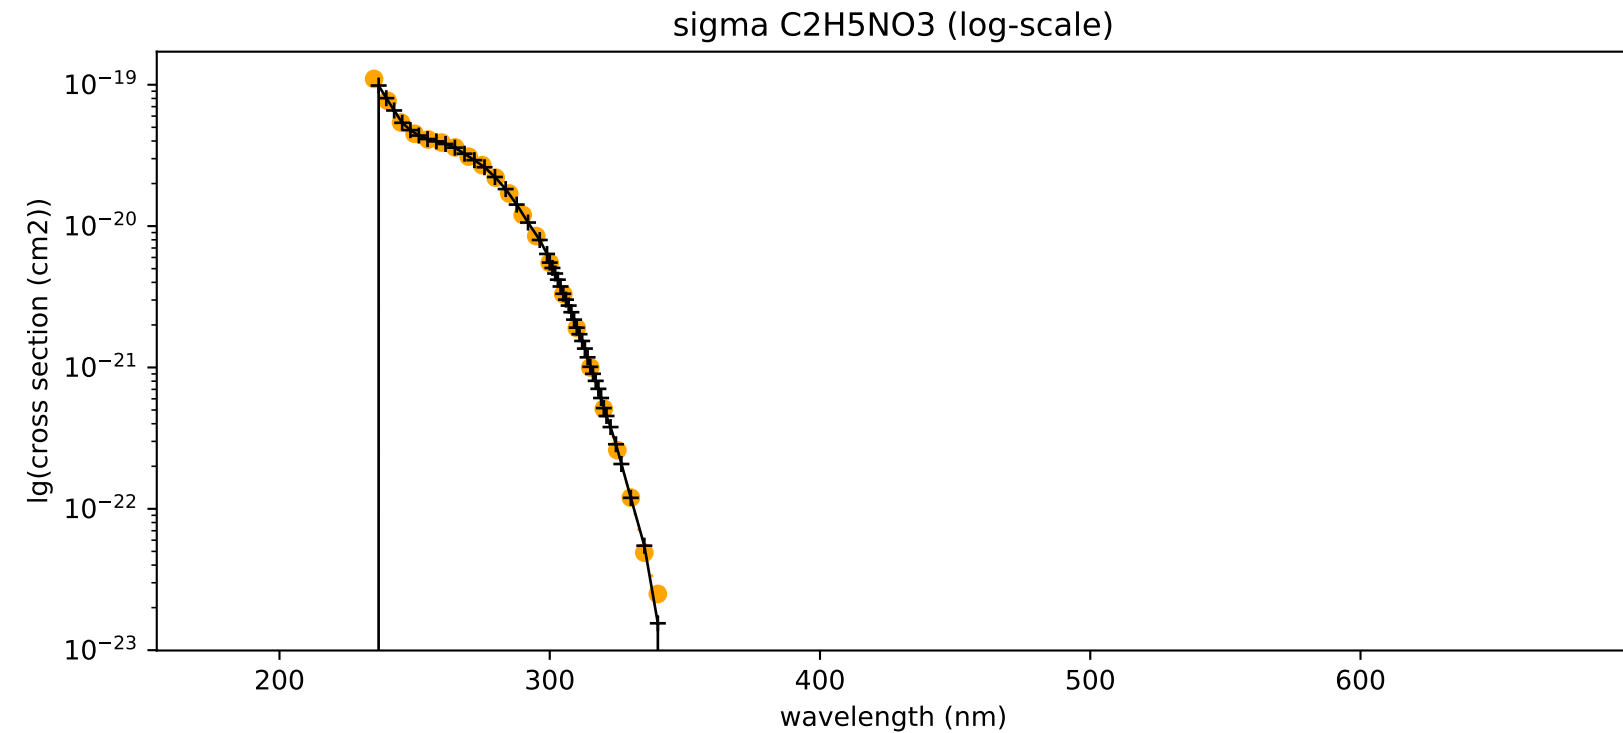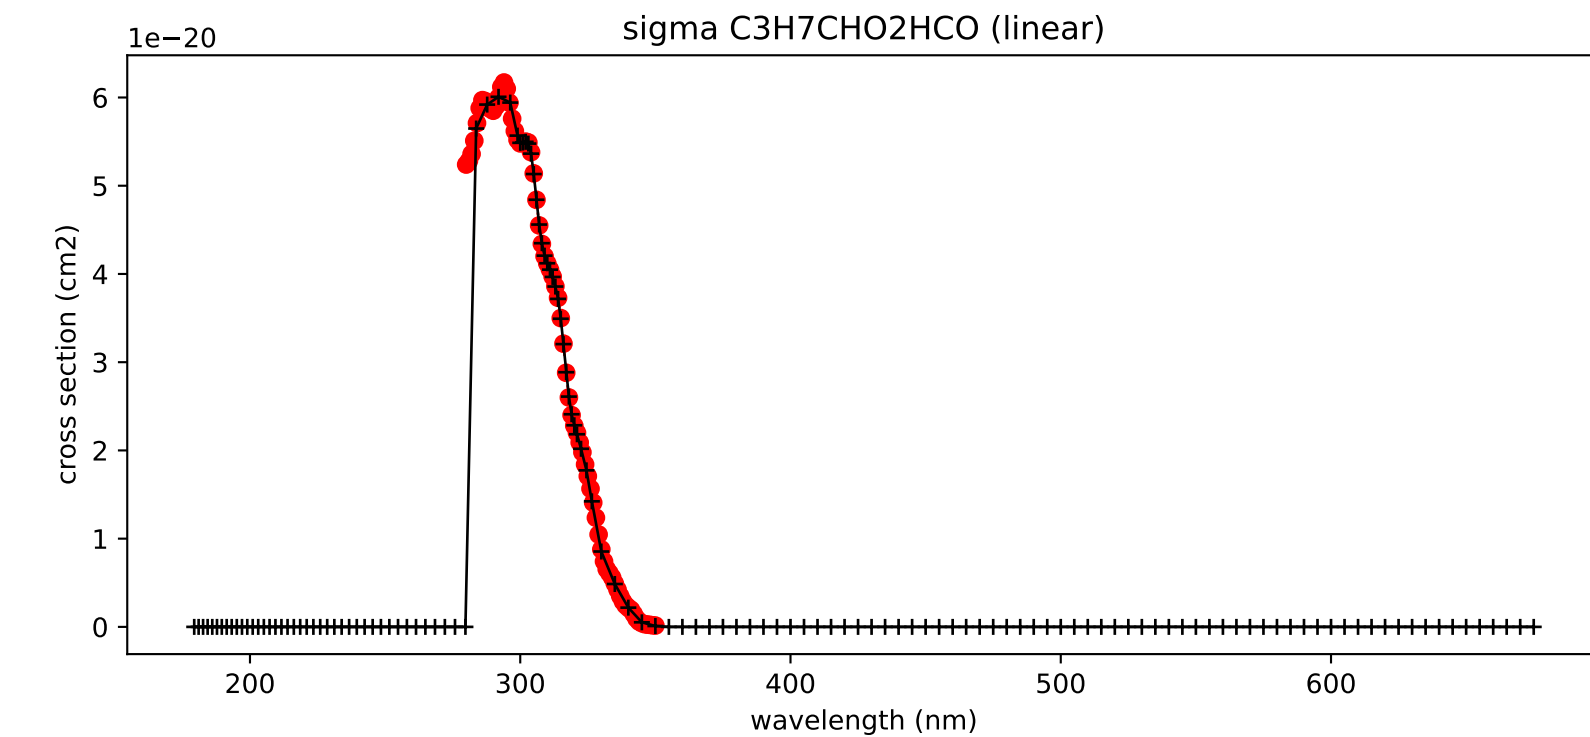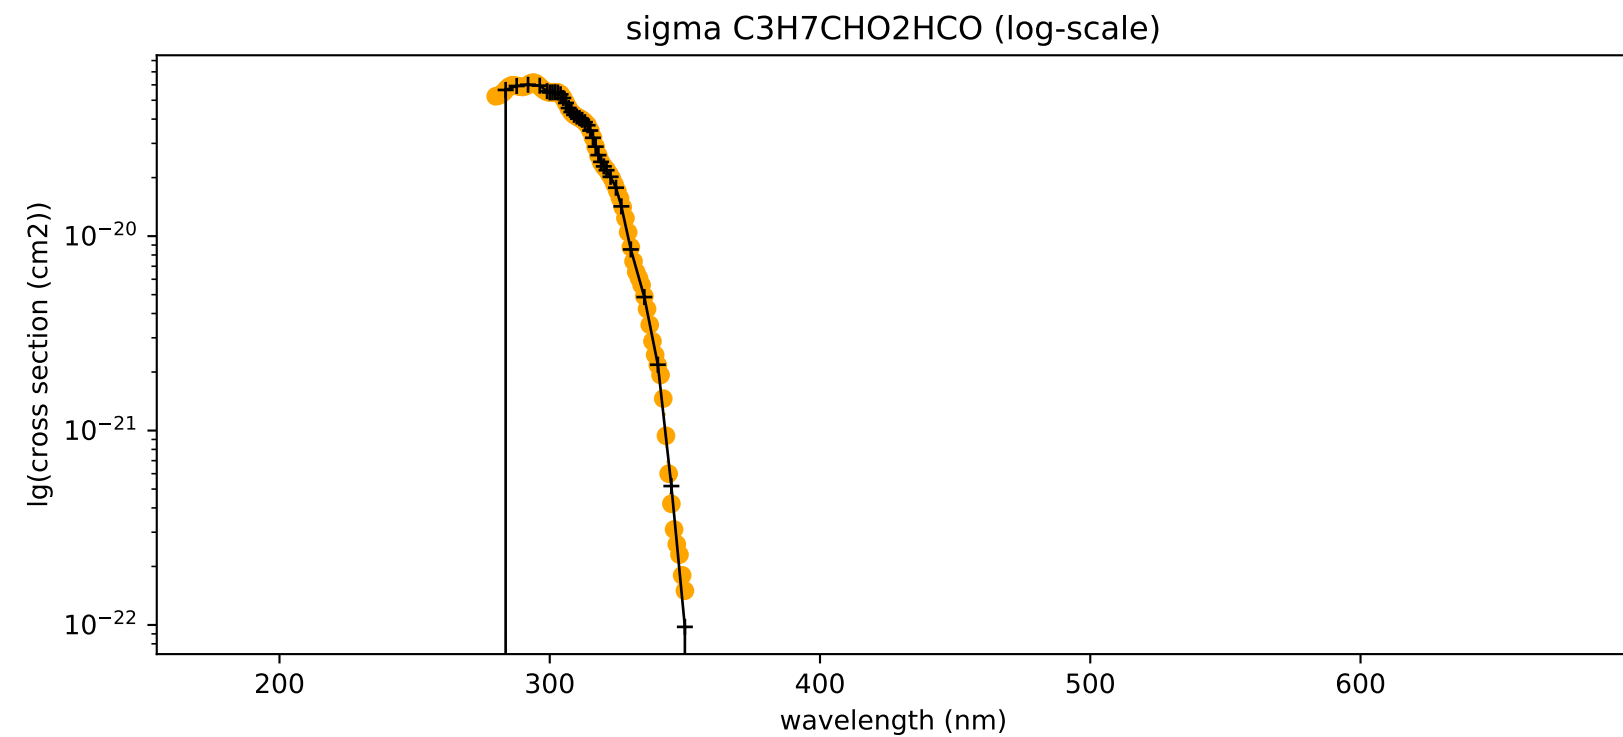

sigma C3H7CHO2VINY (linear)

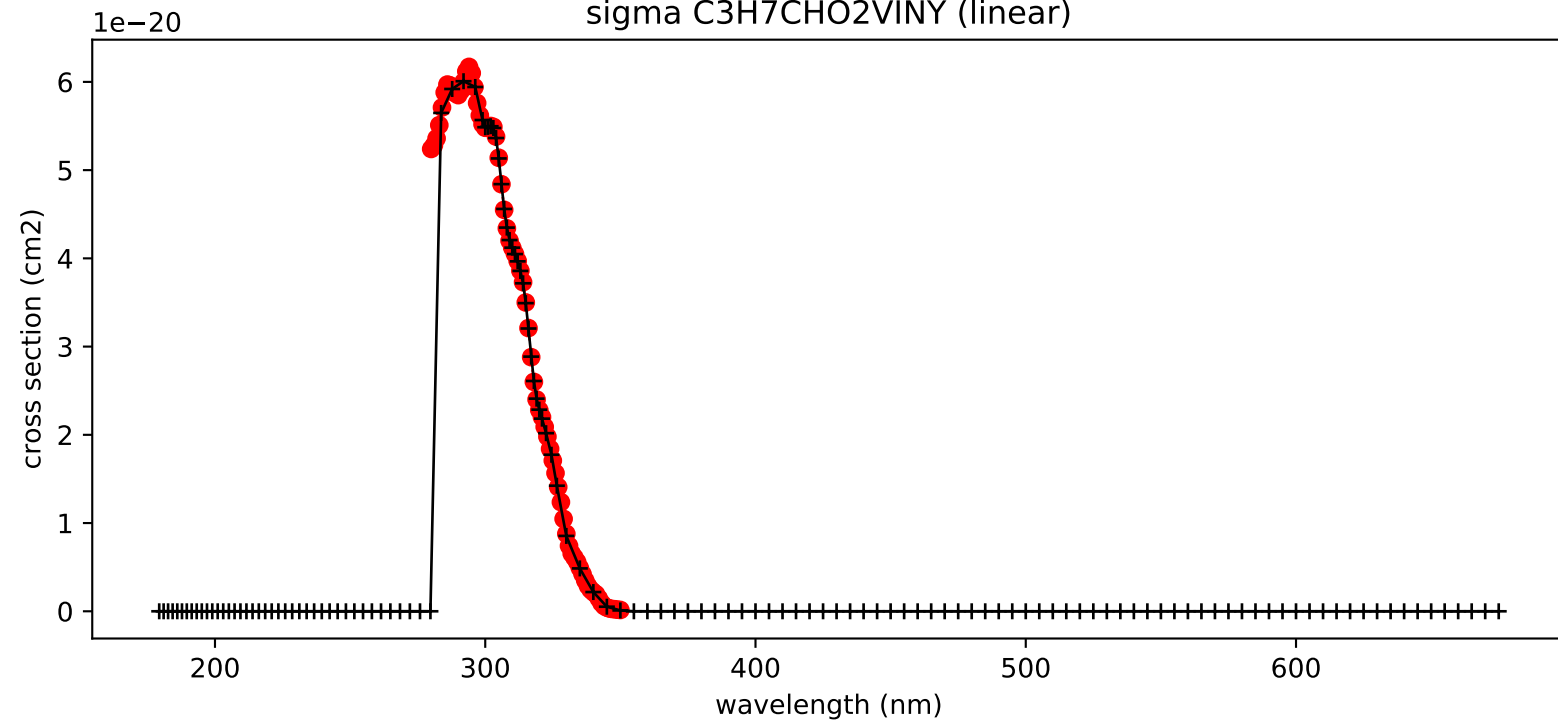

sigma C3H7CHO2VINY (log-scale)

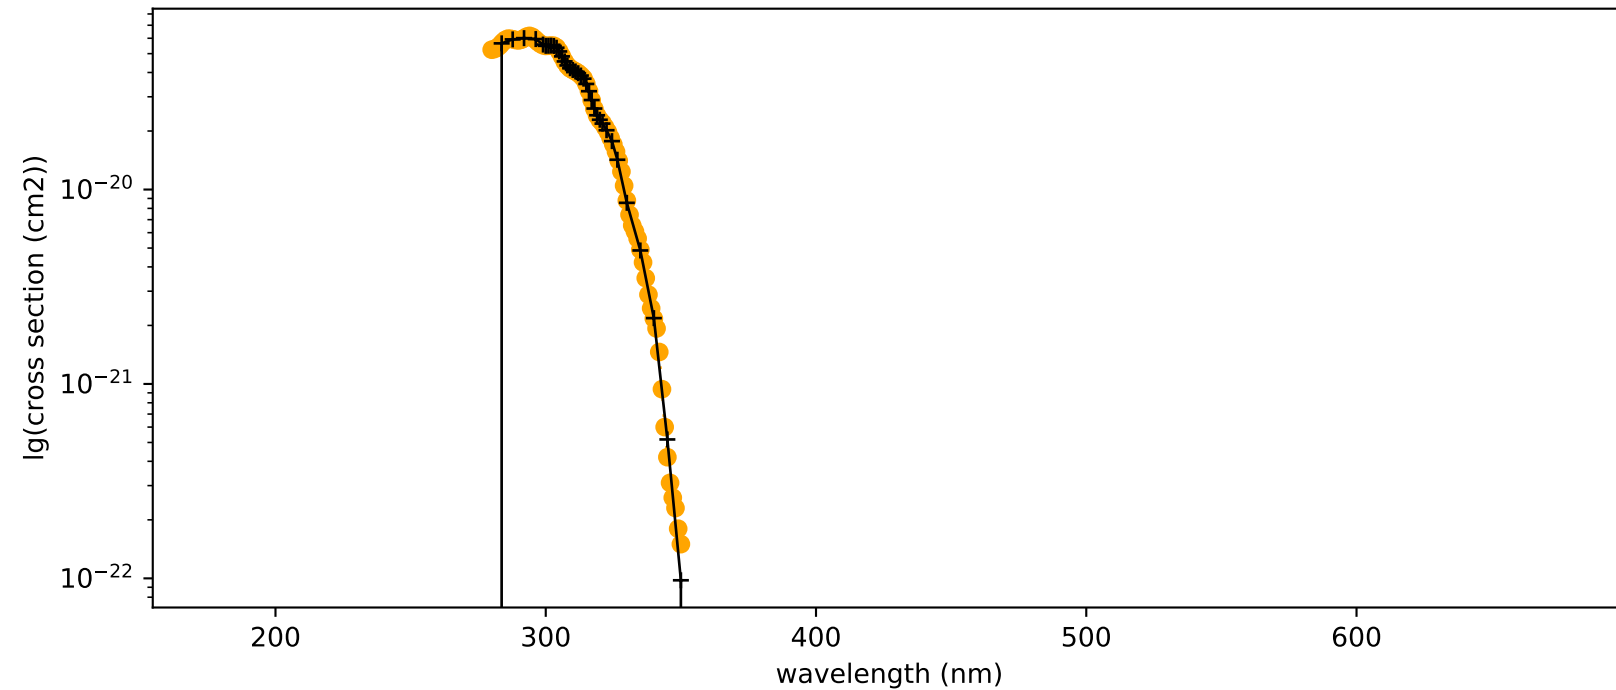

sigma C3H7I (linear)

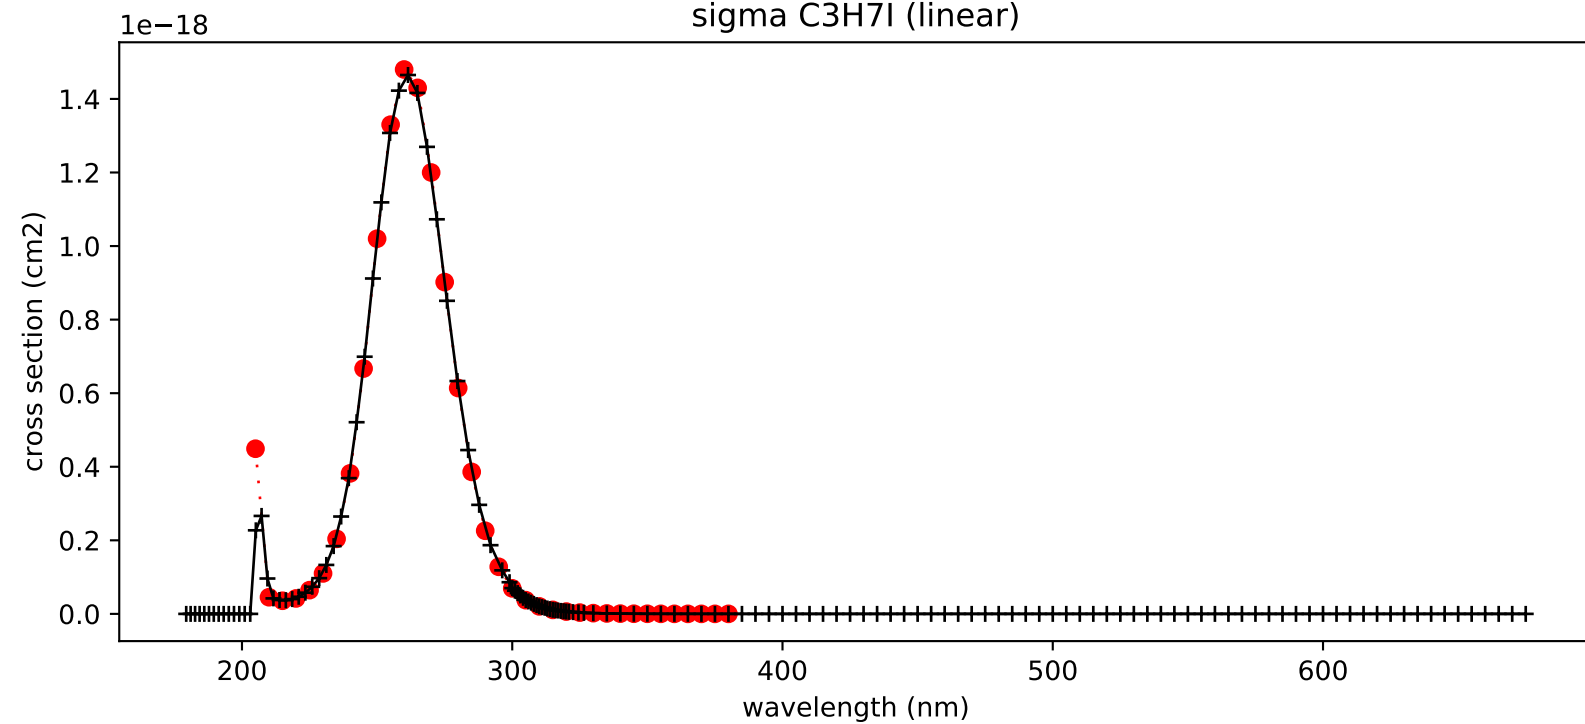

sigma C3H7I (log-scale)

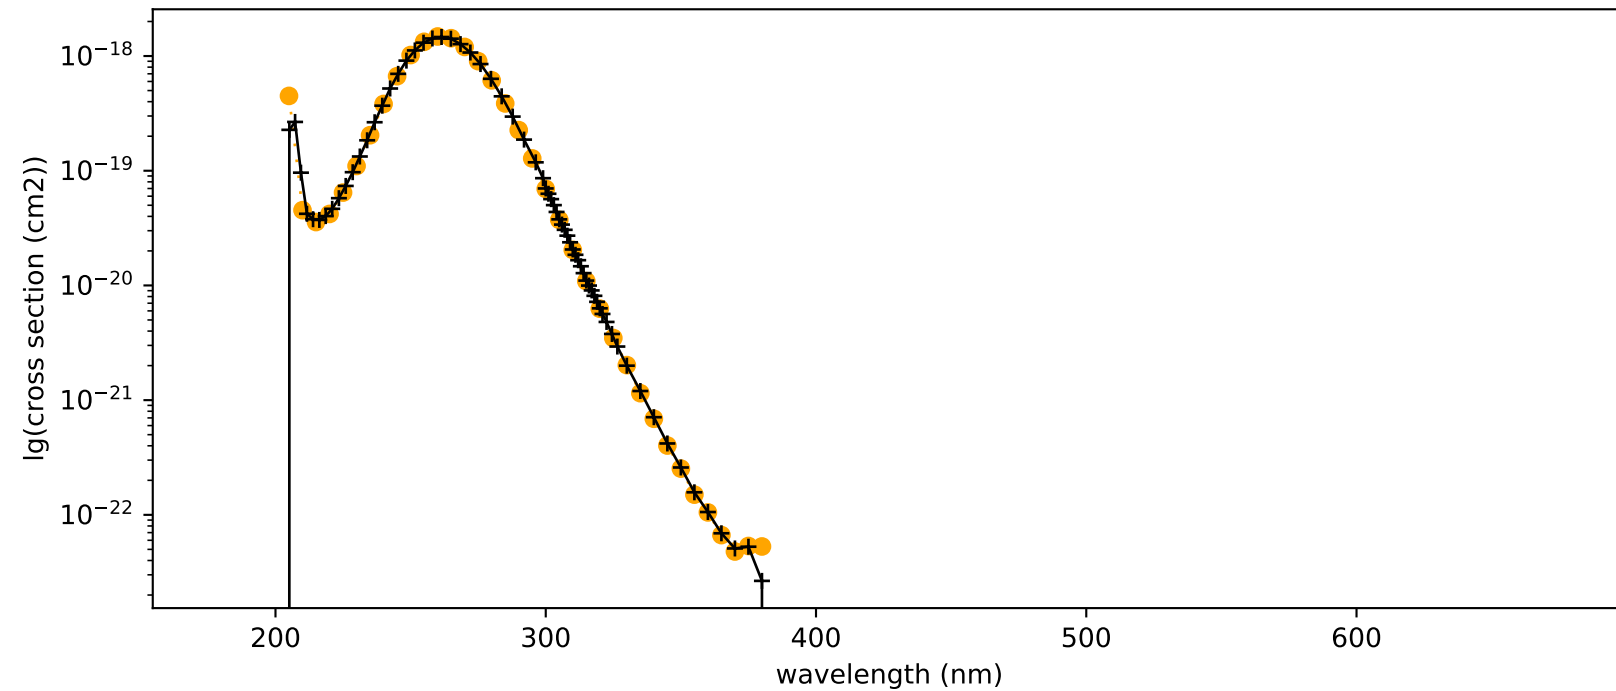

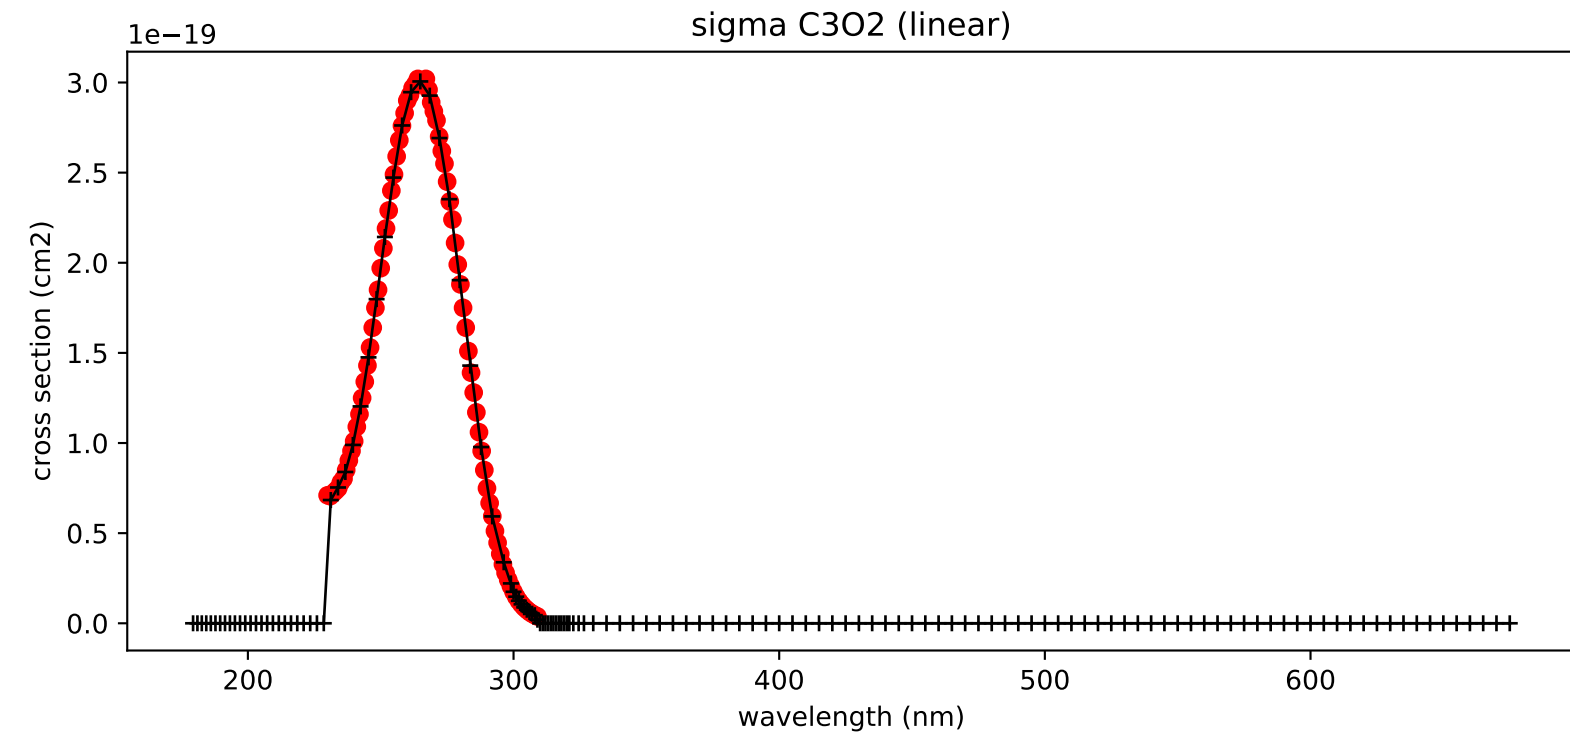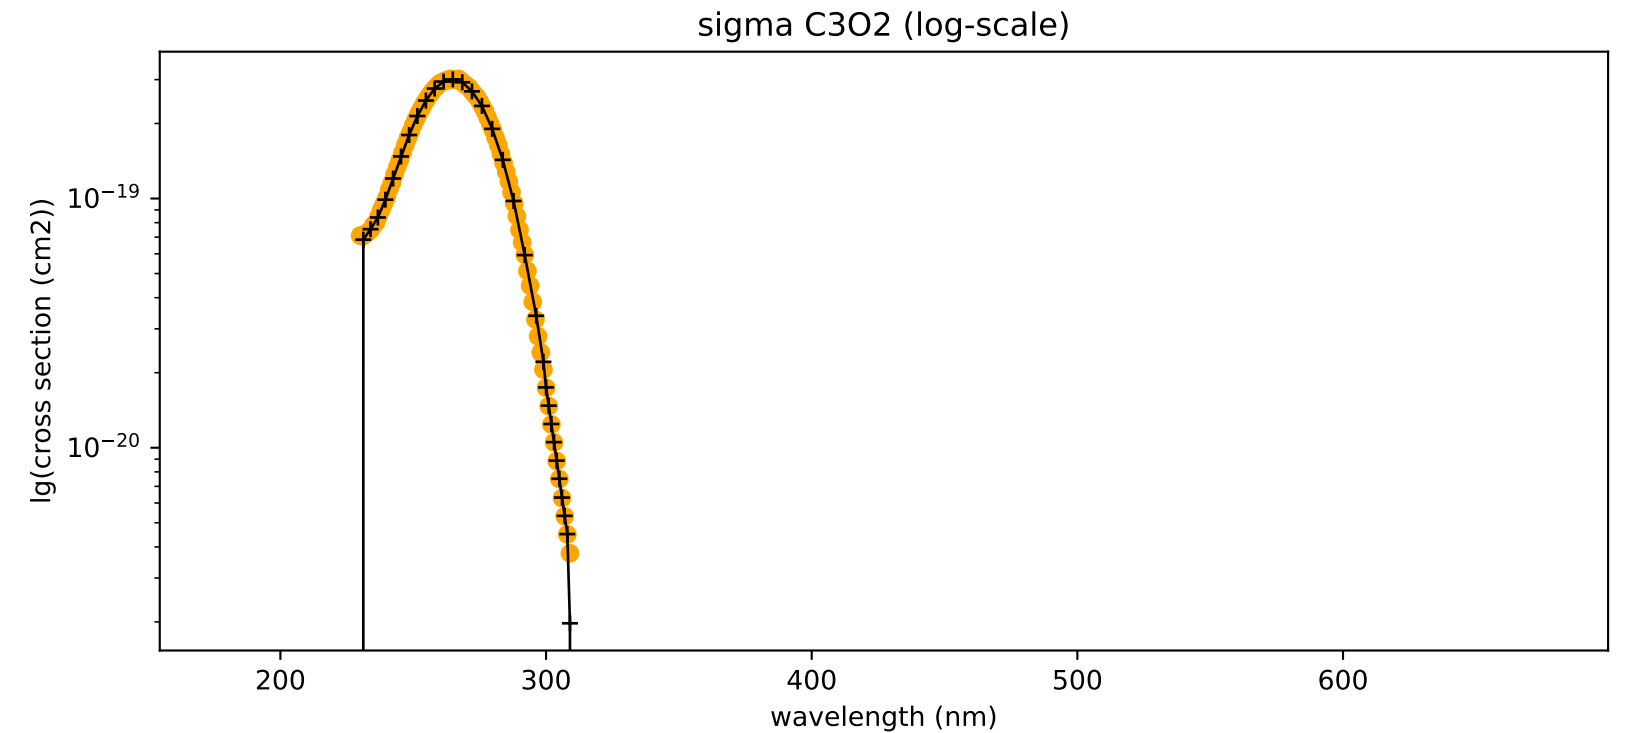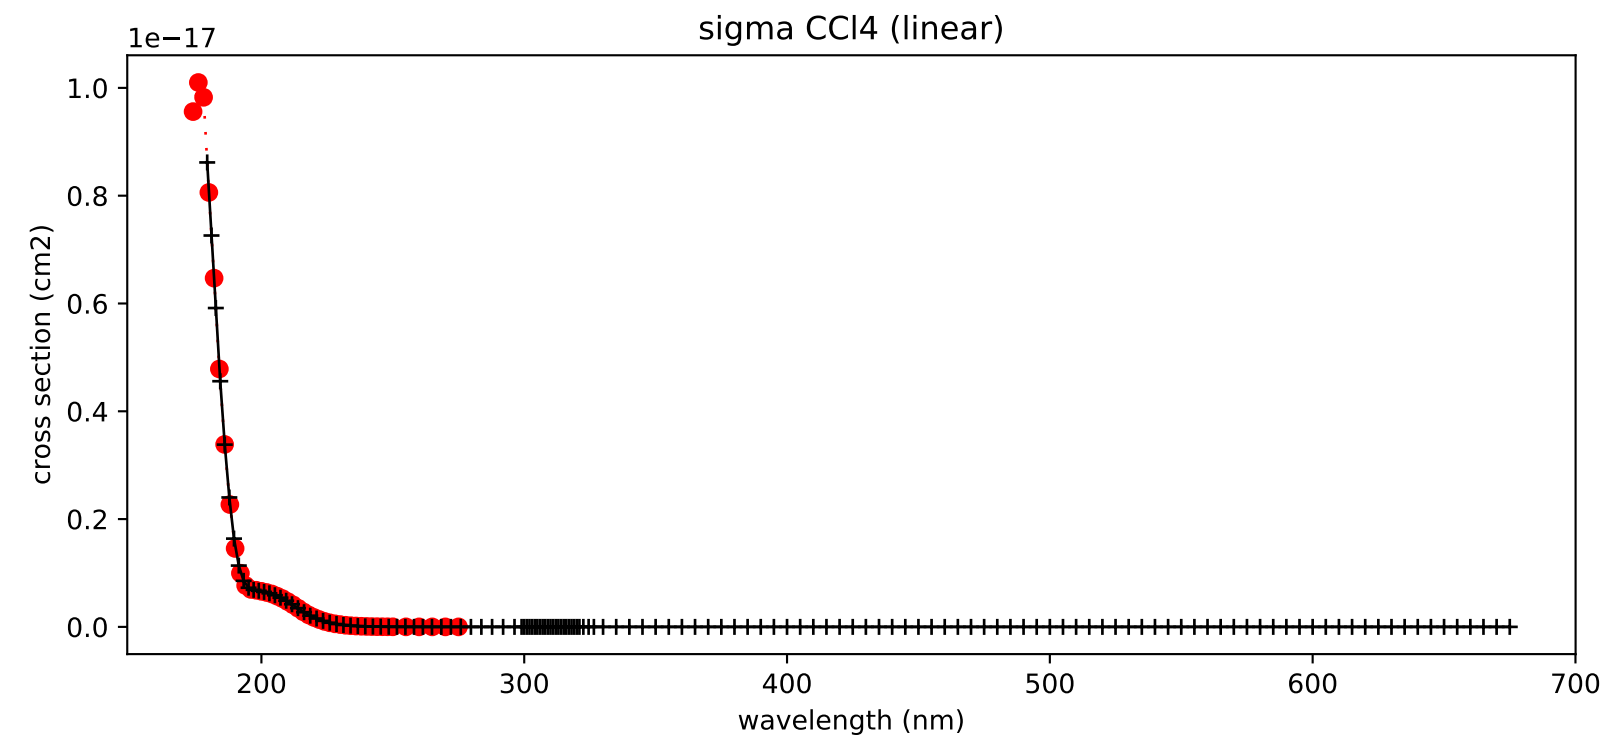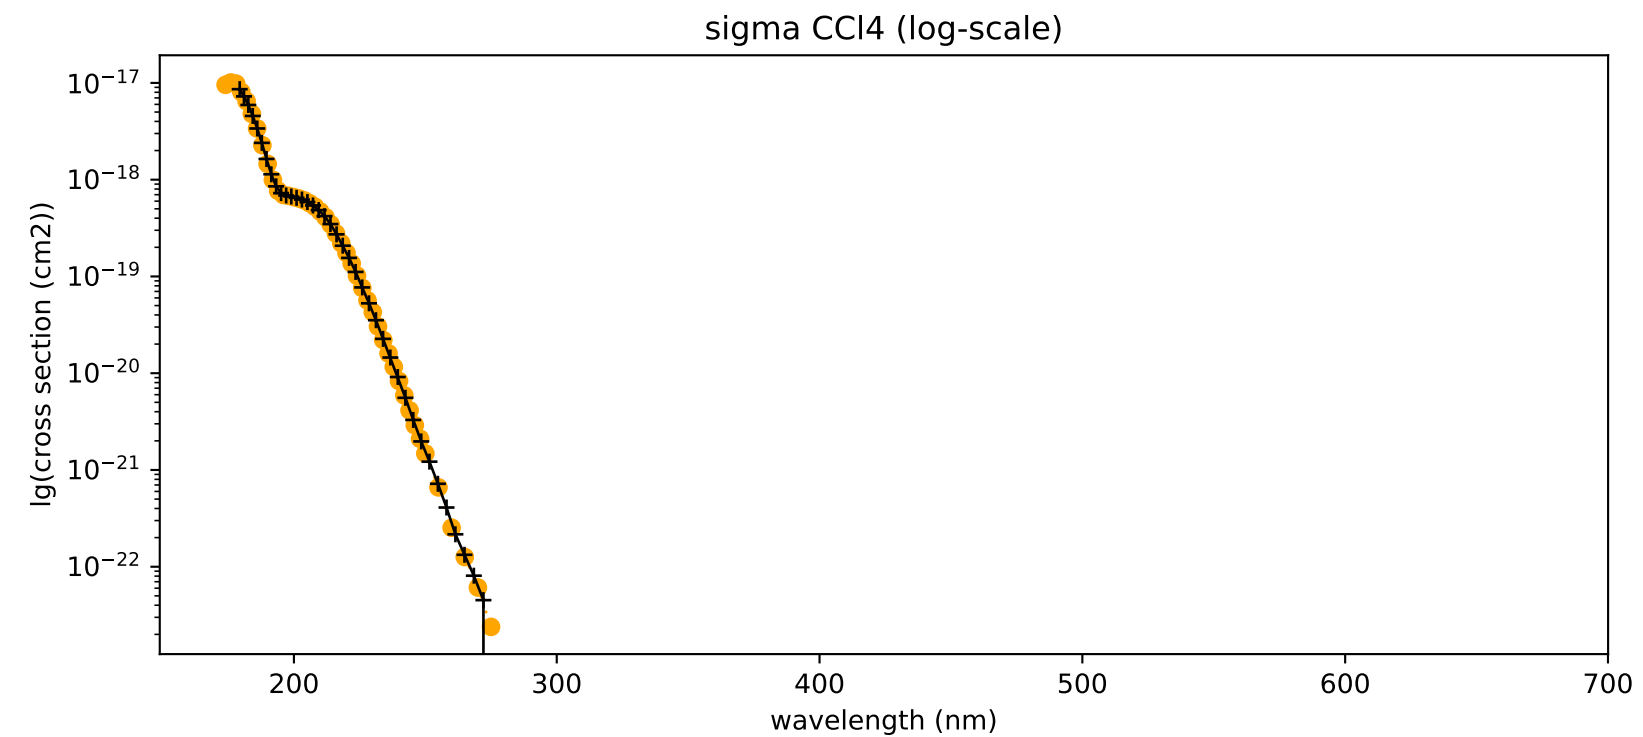

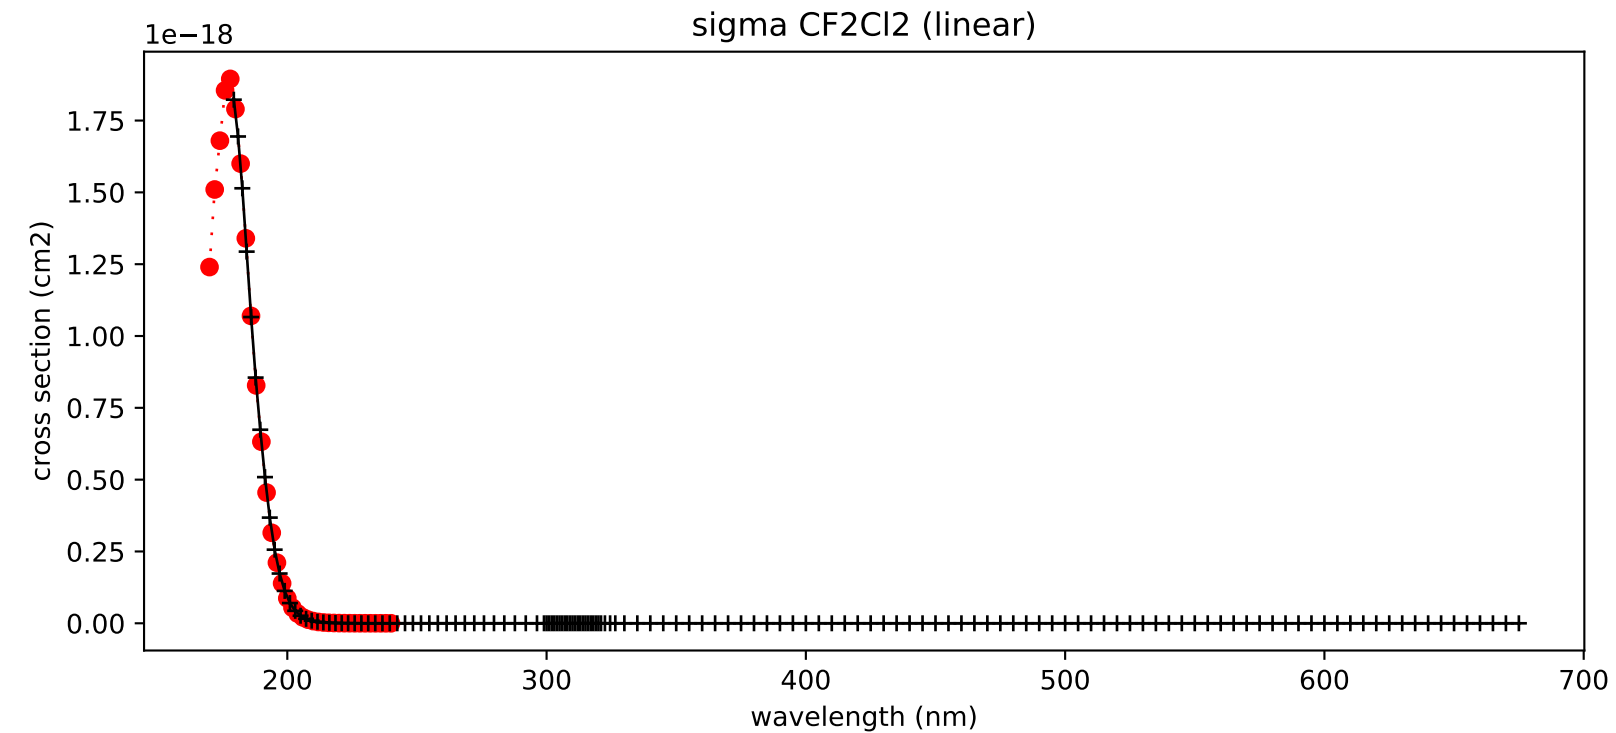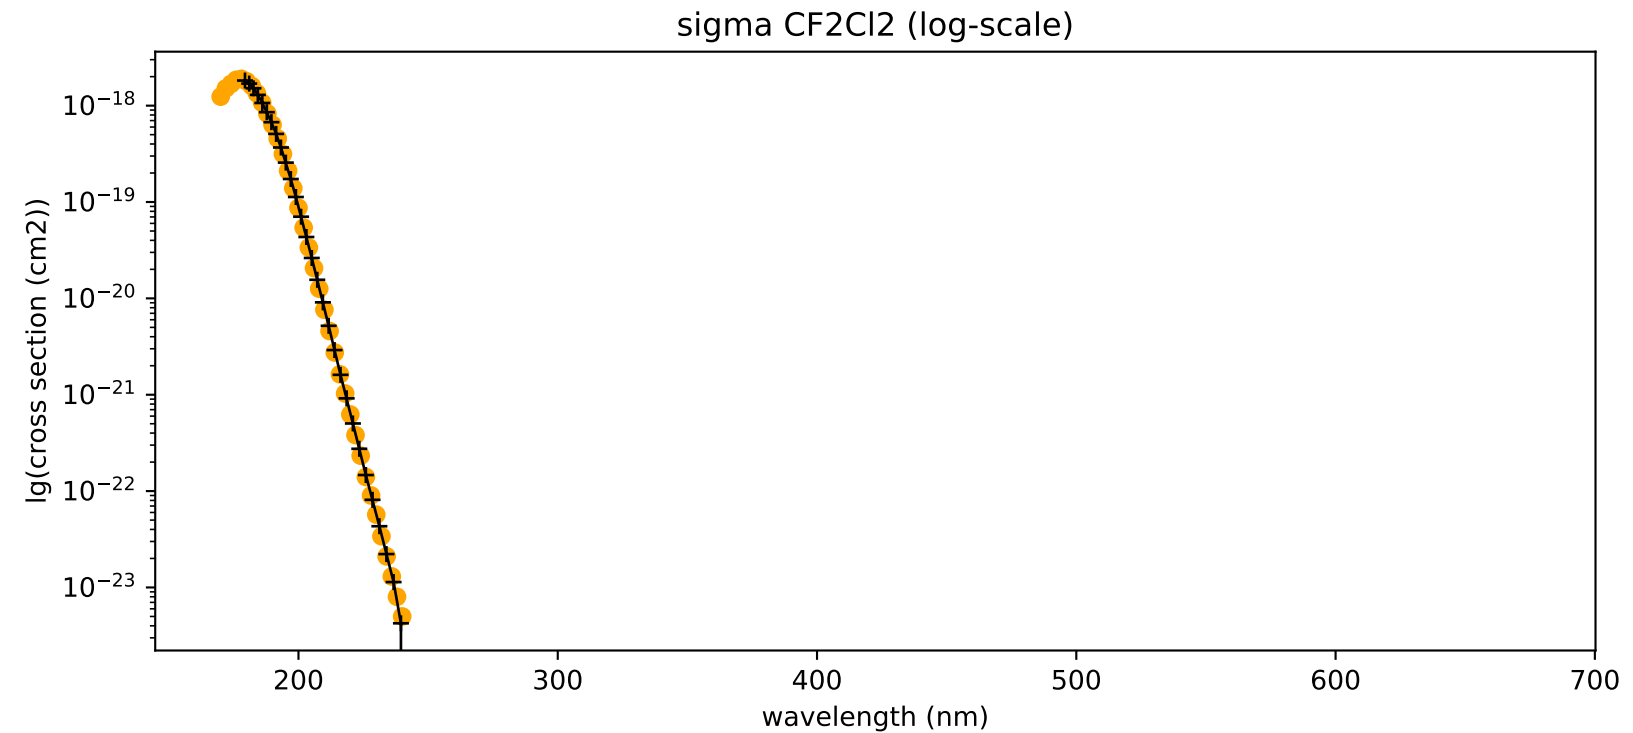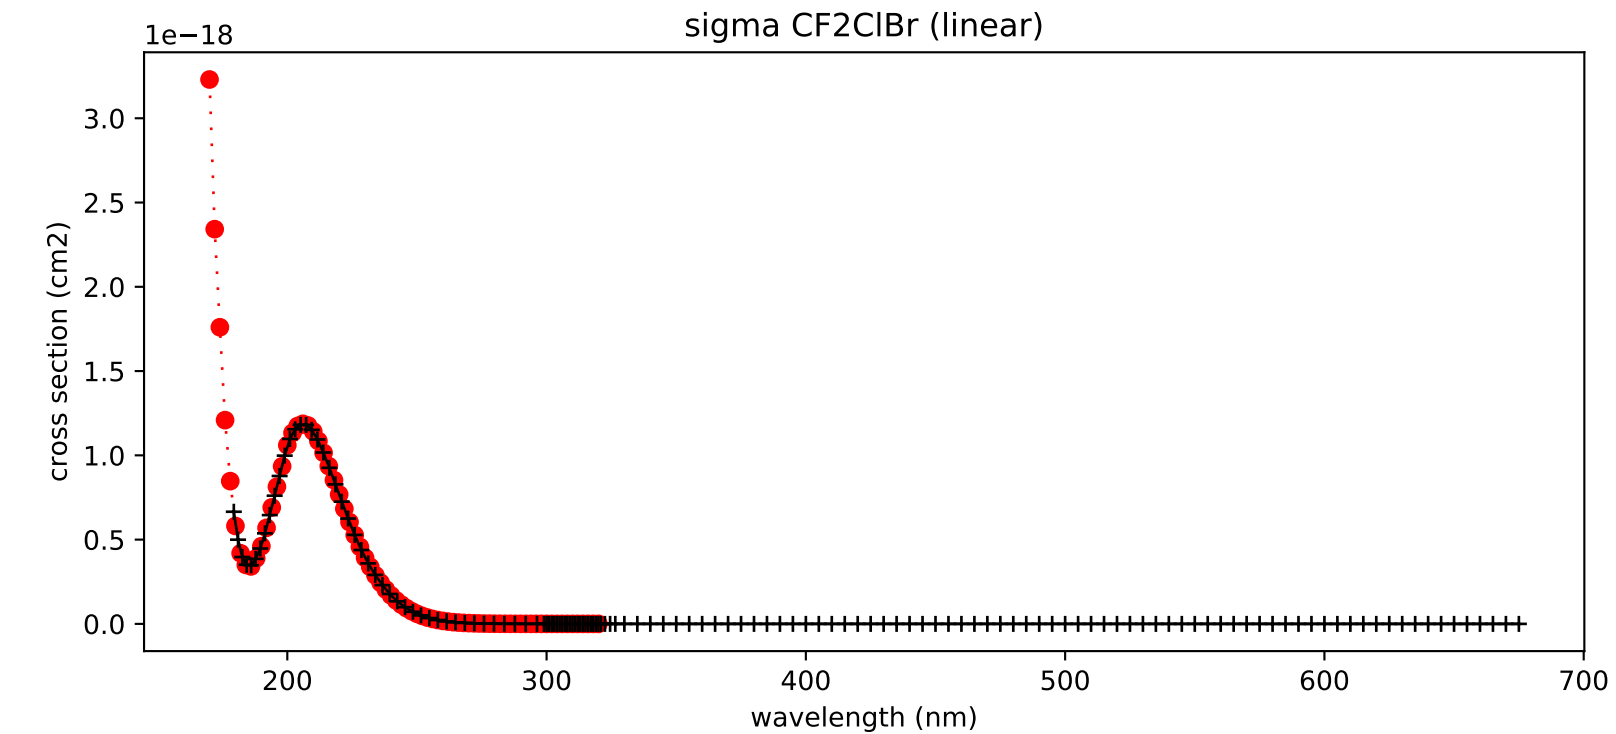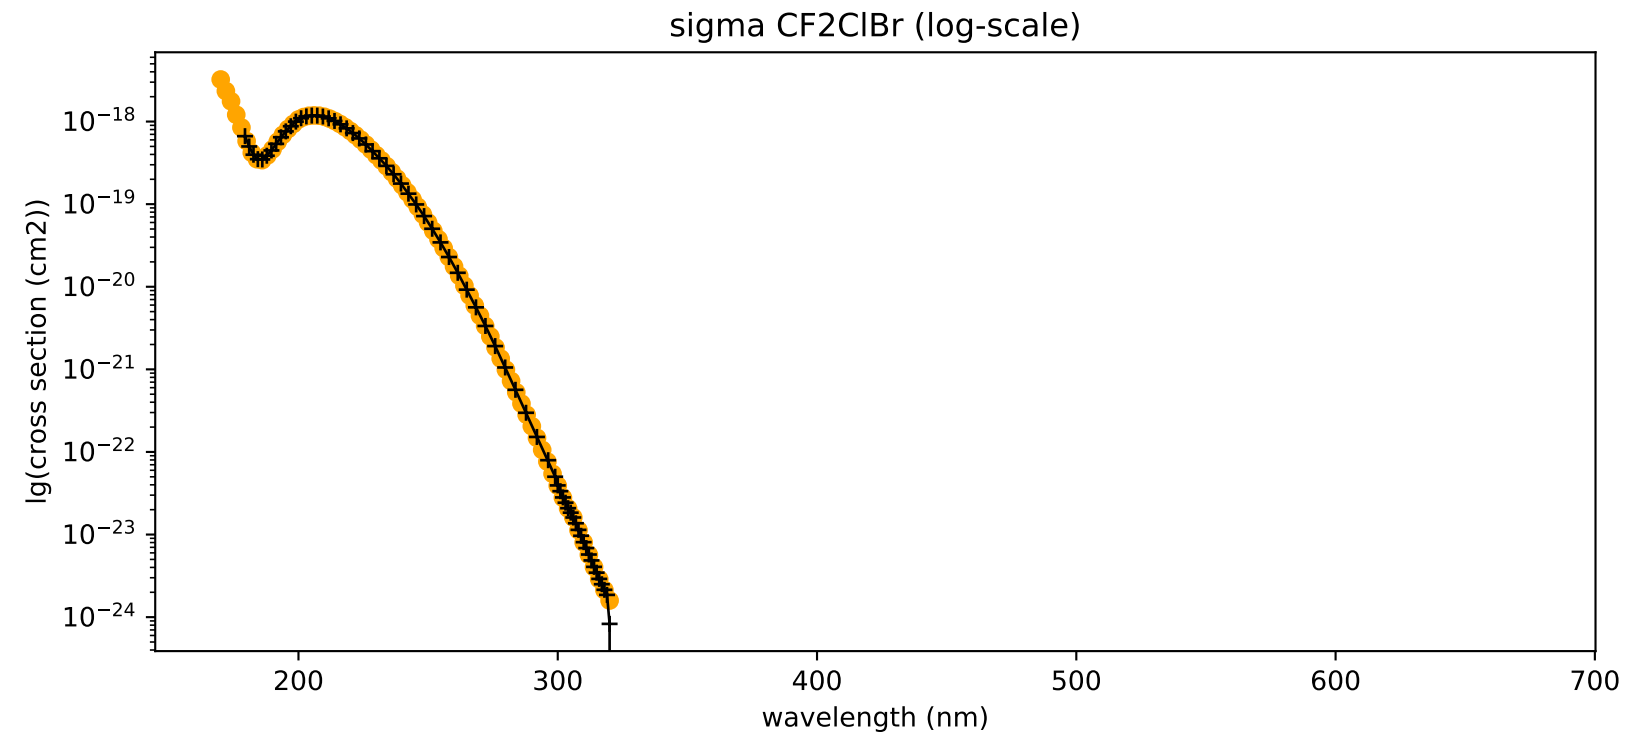



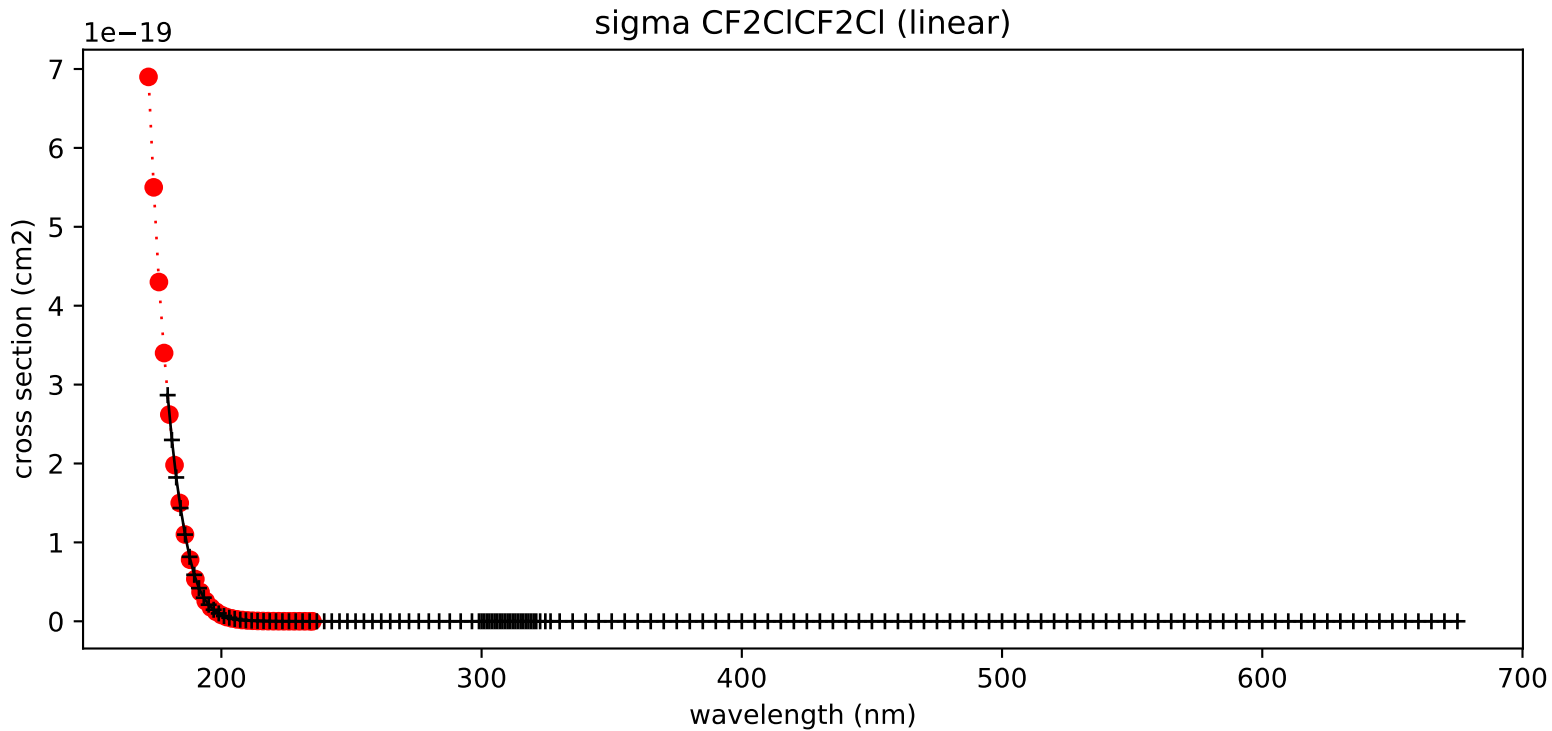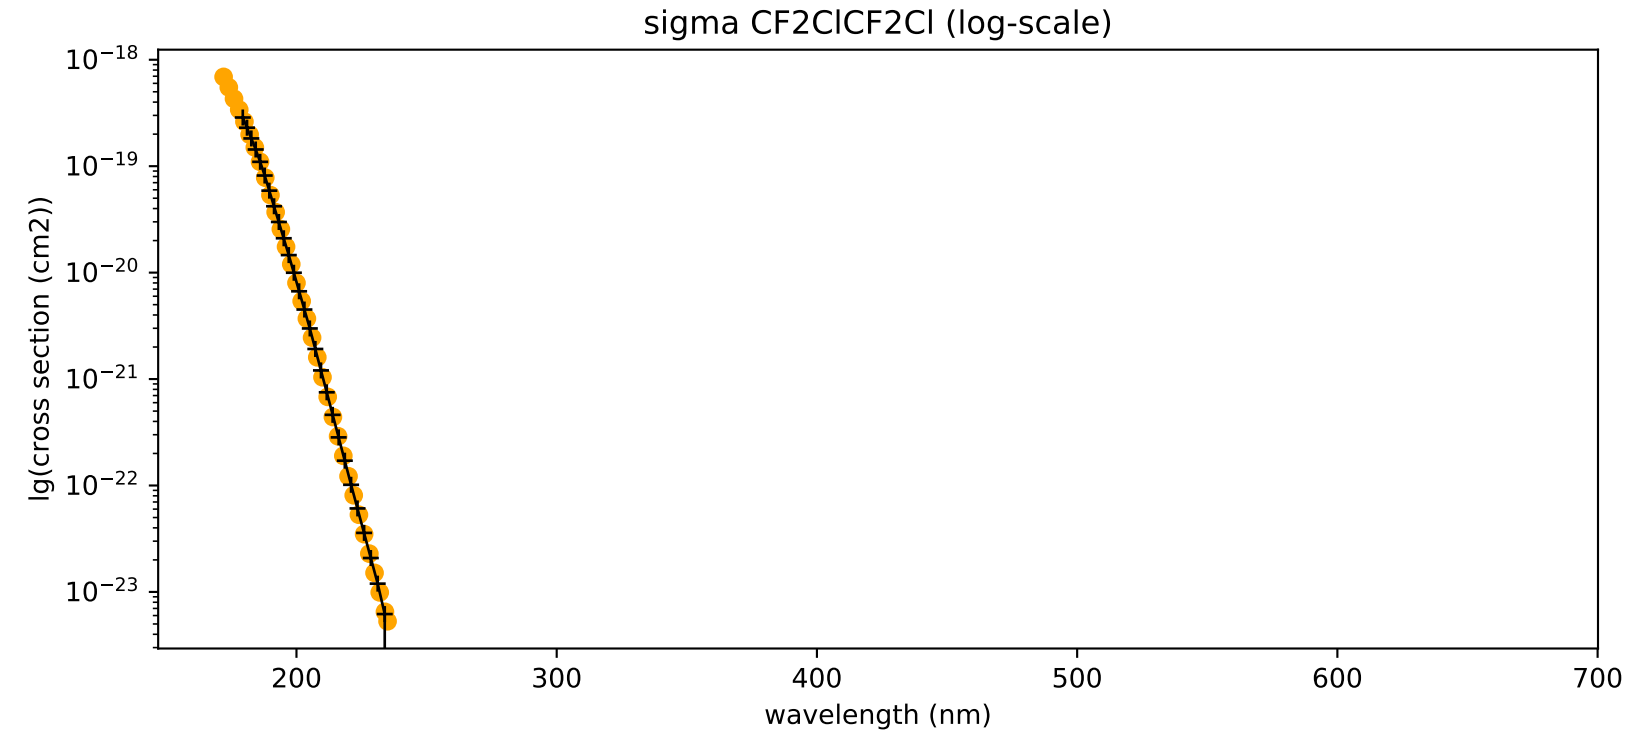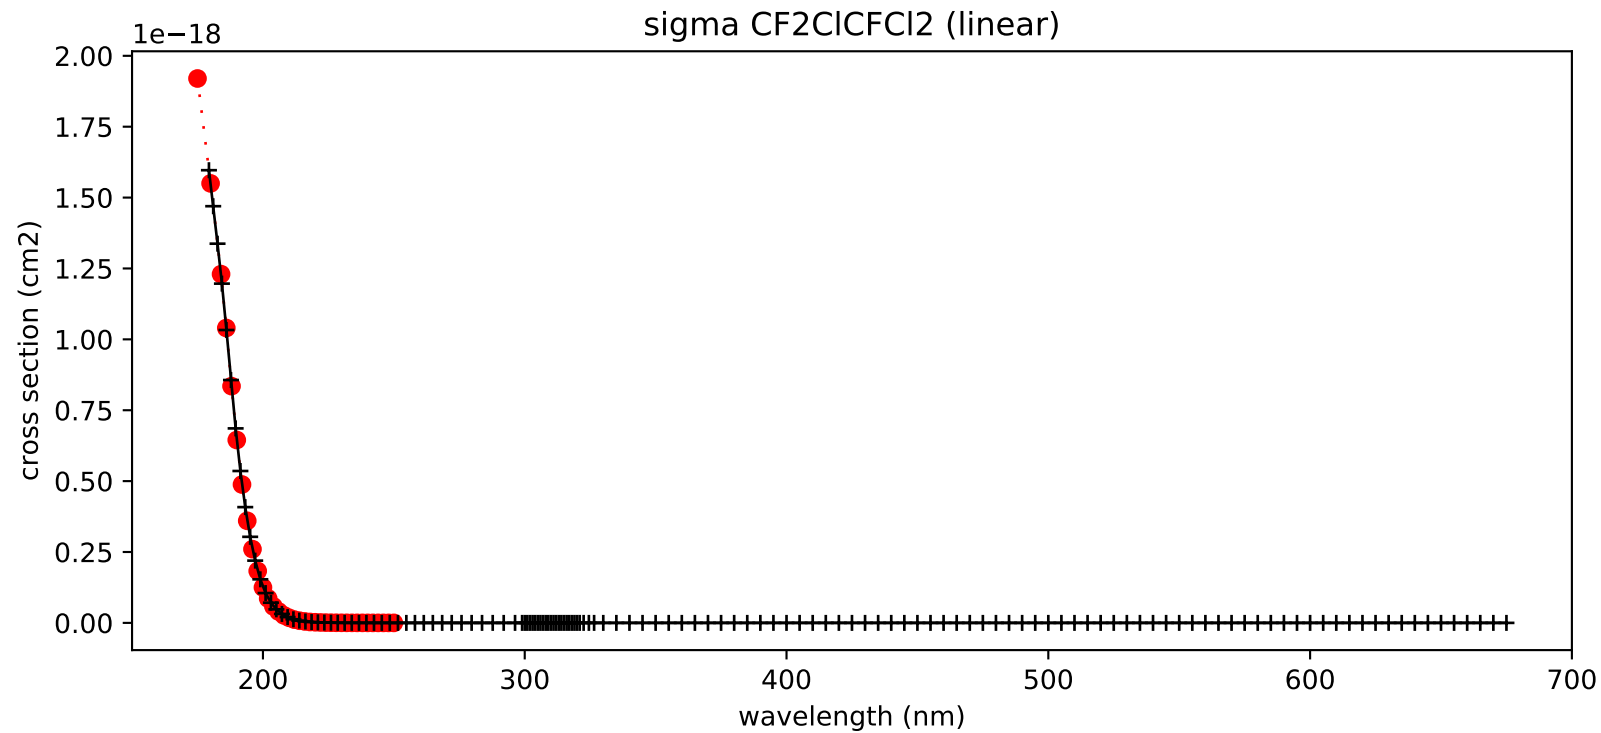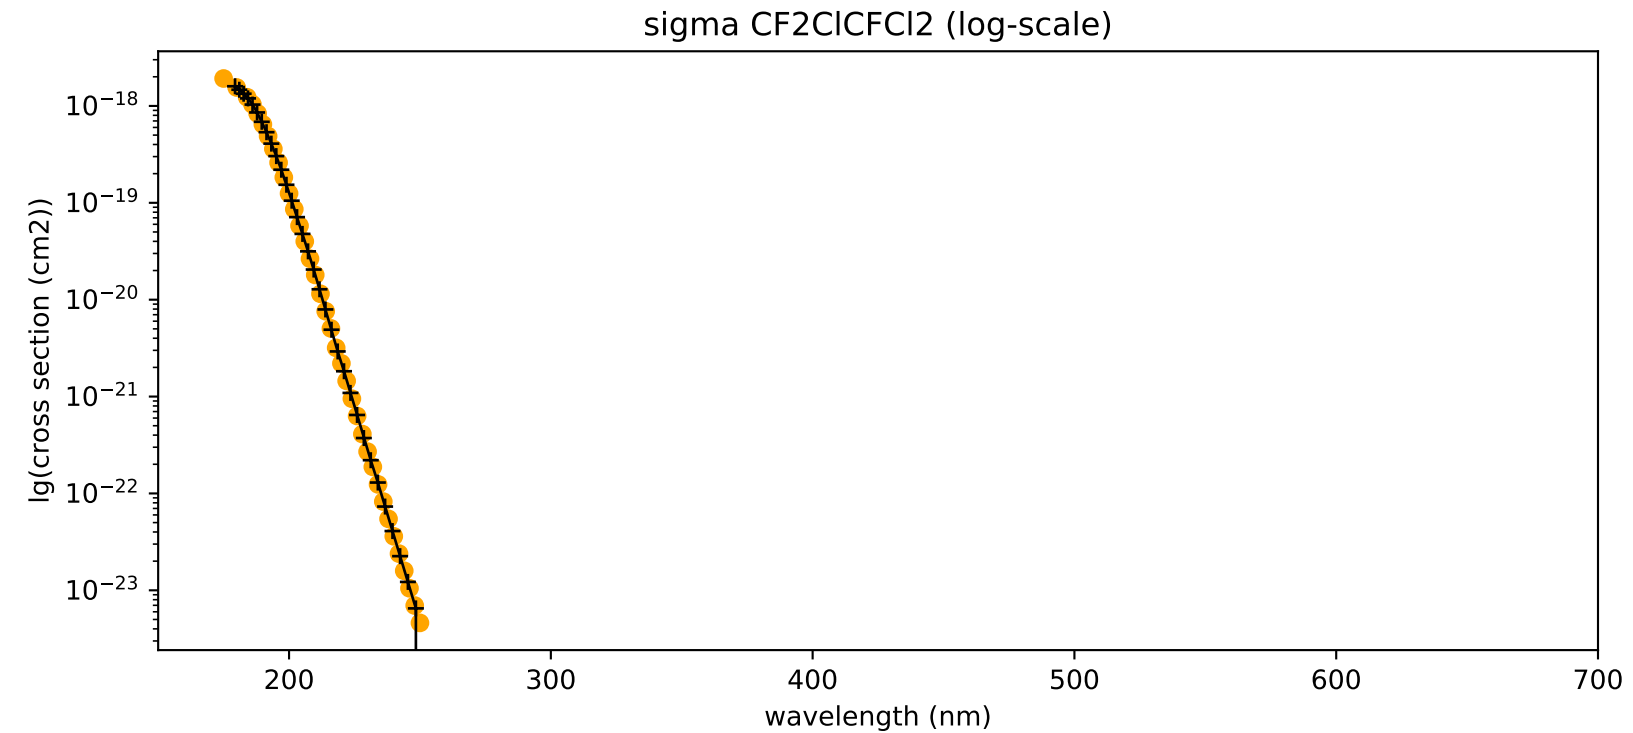

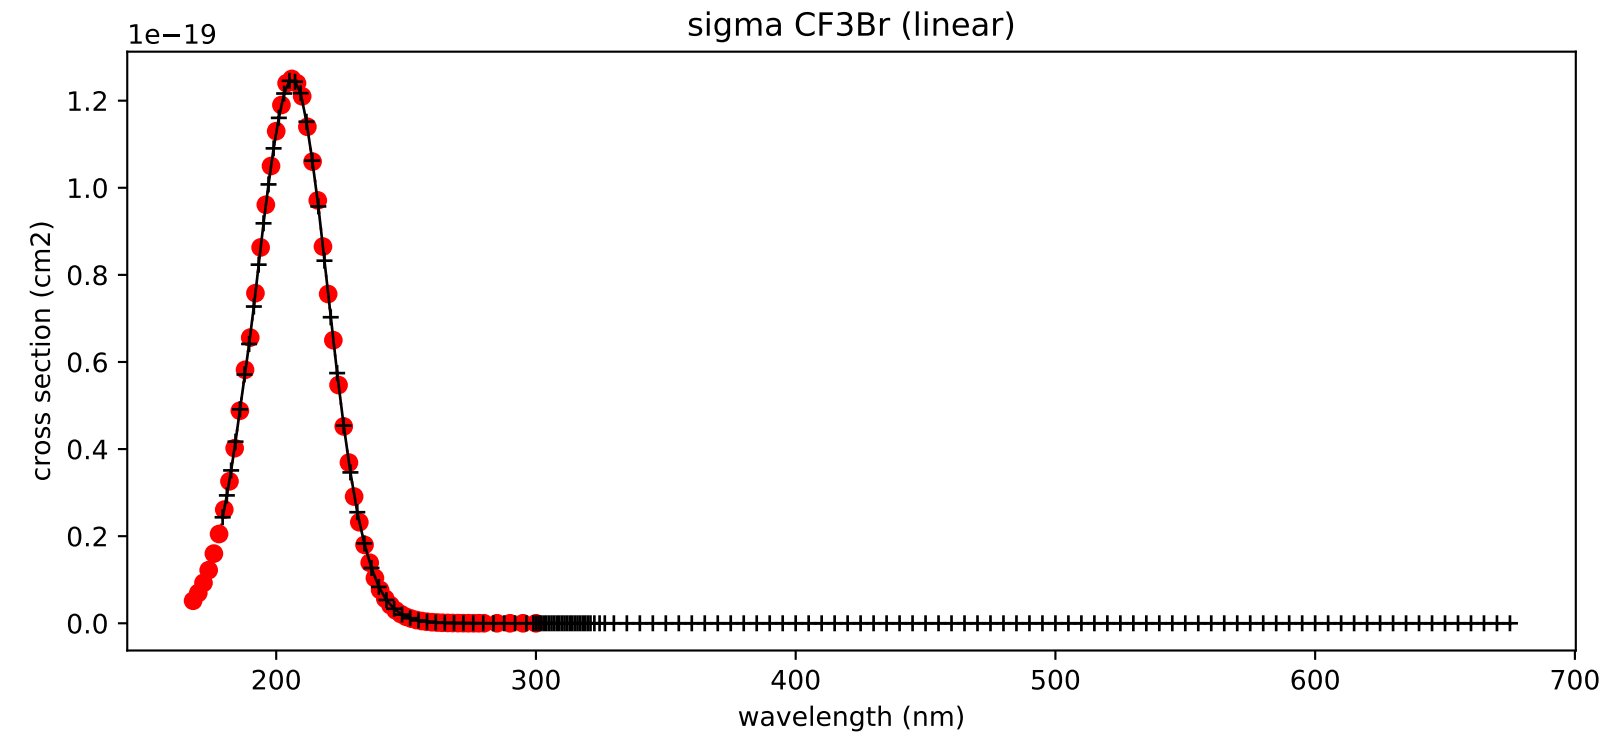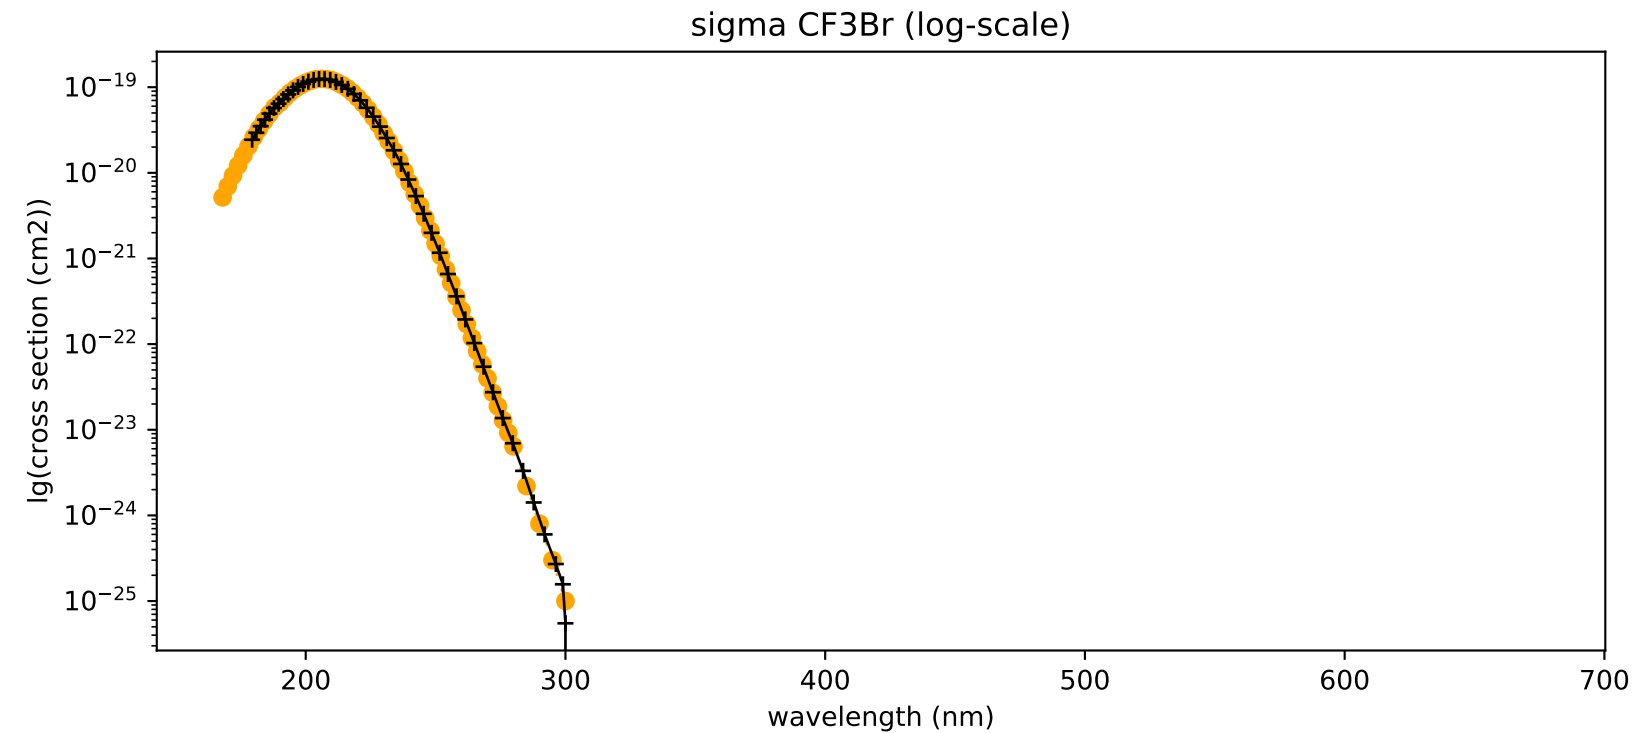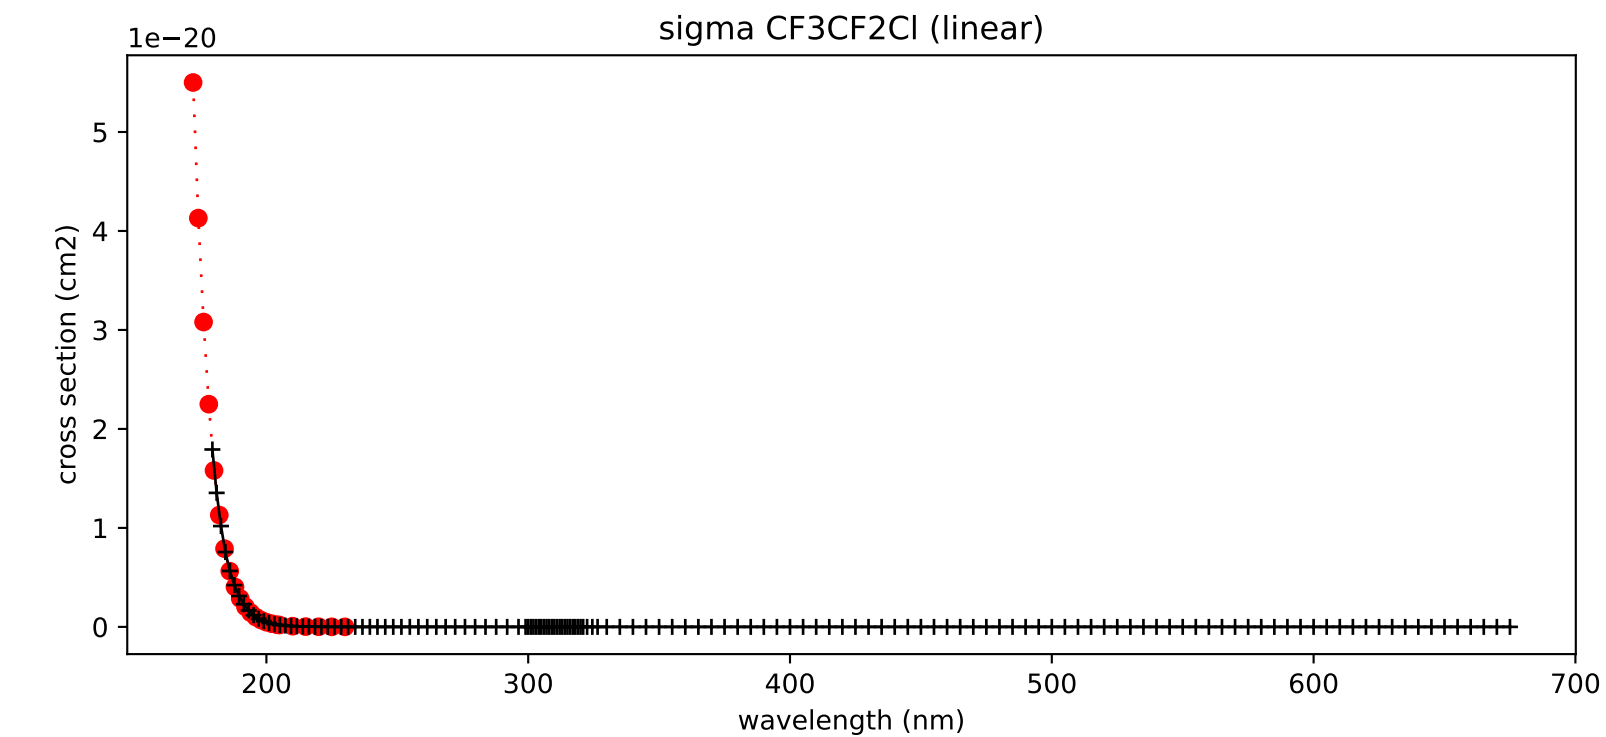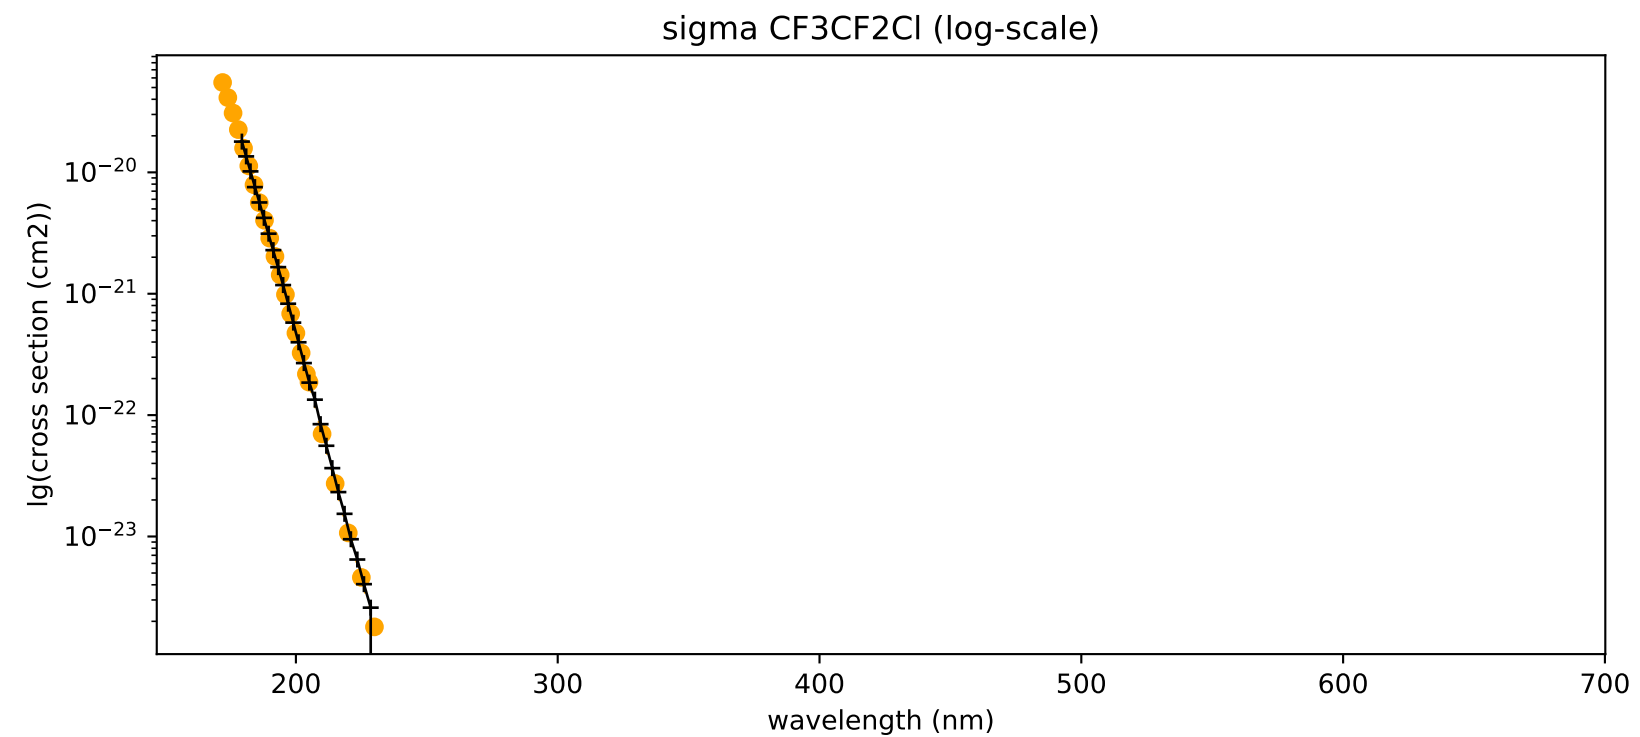

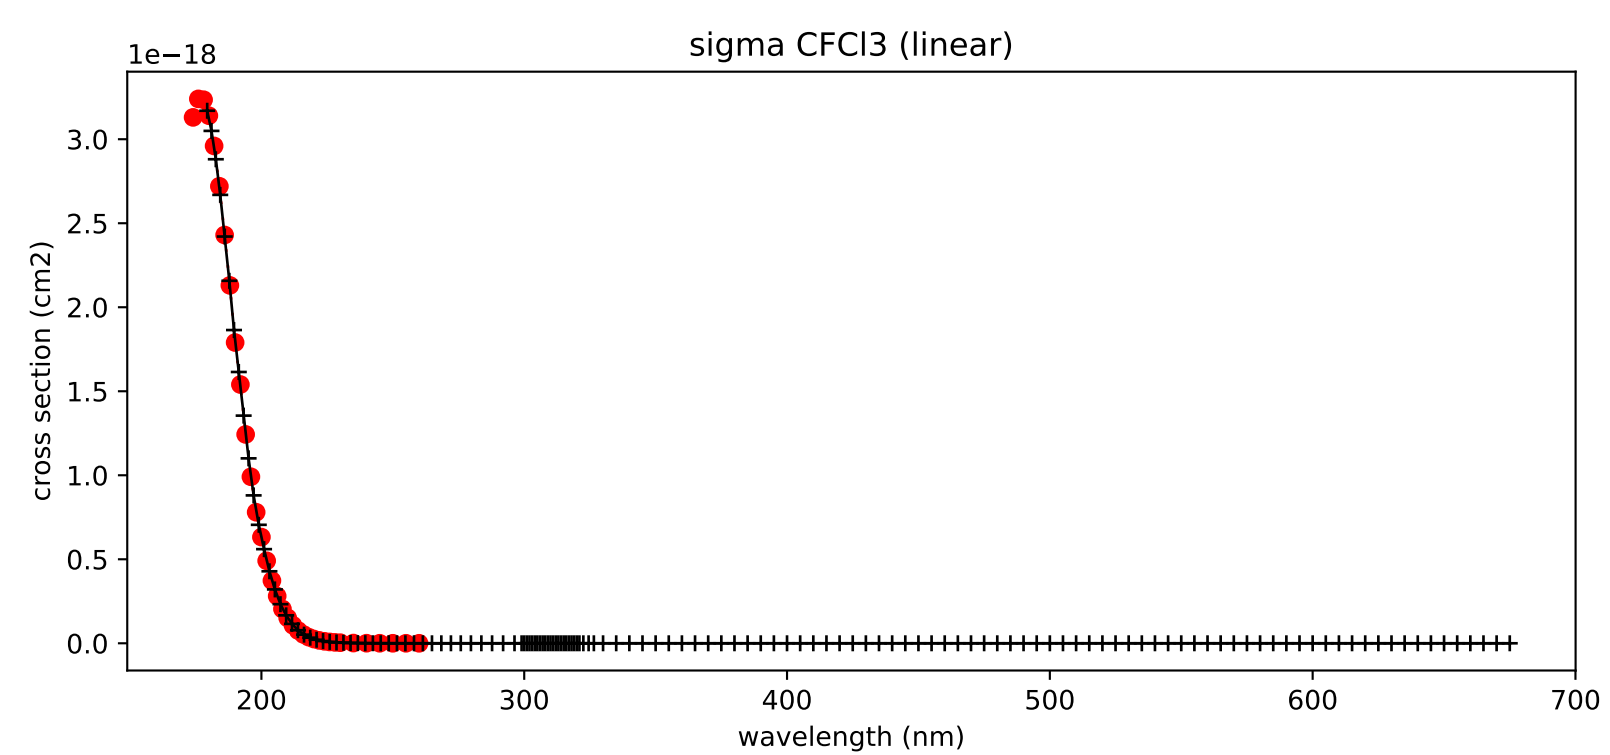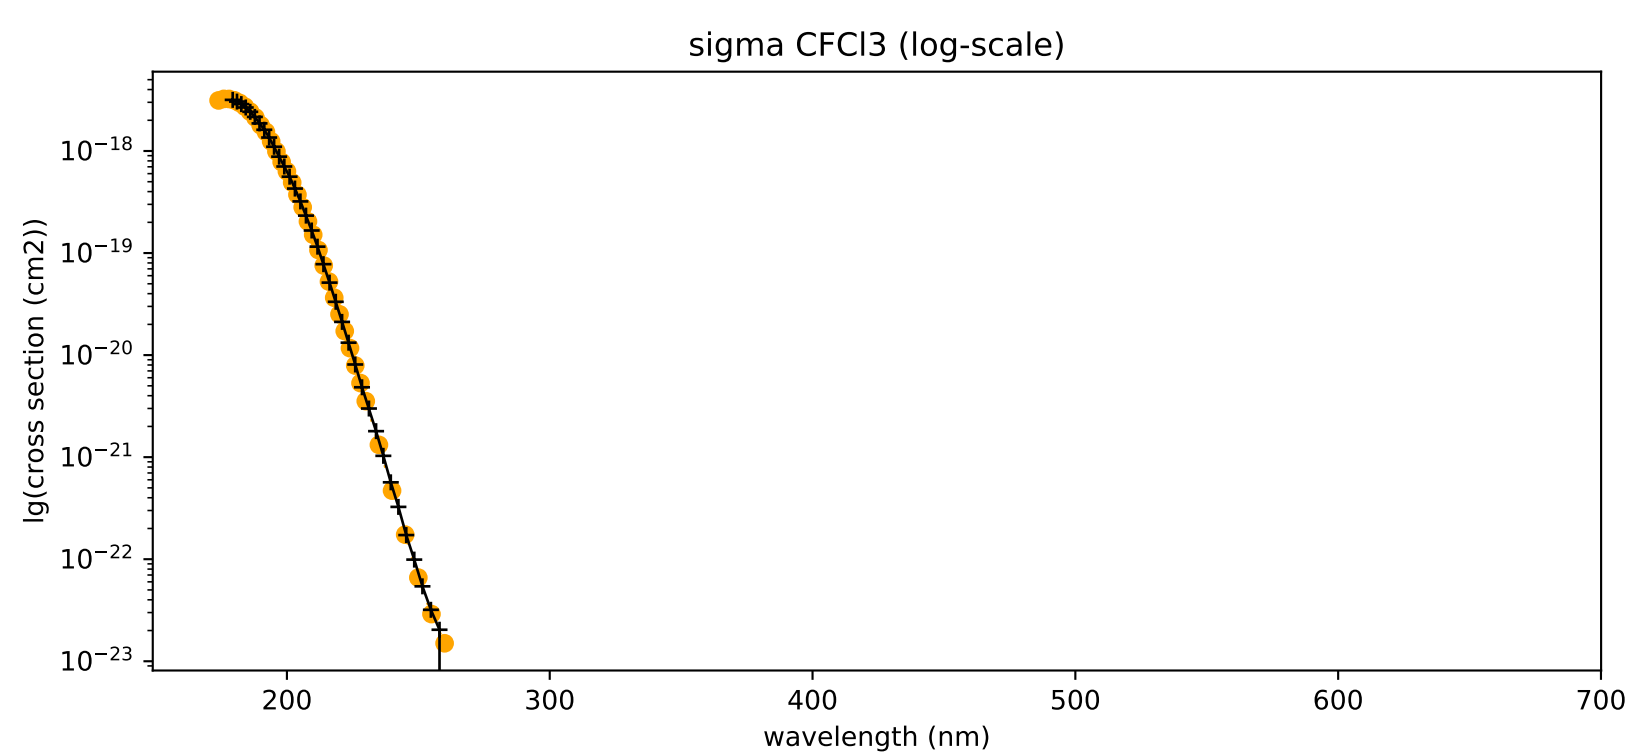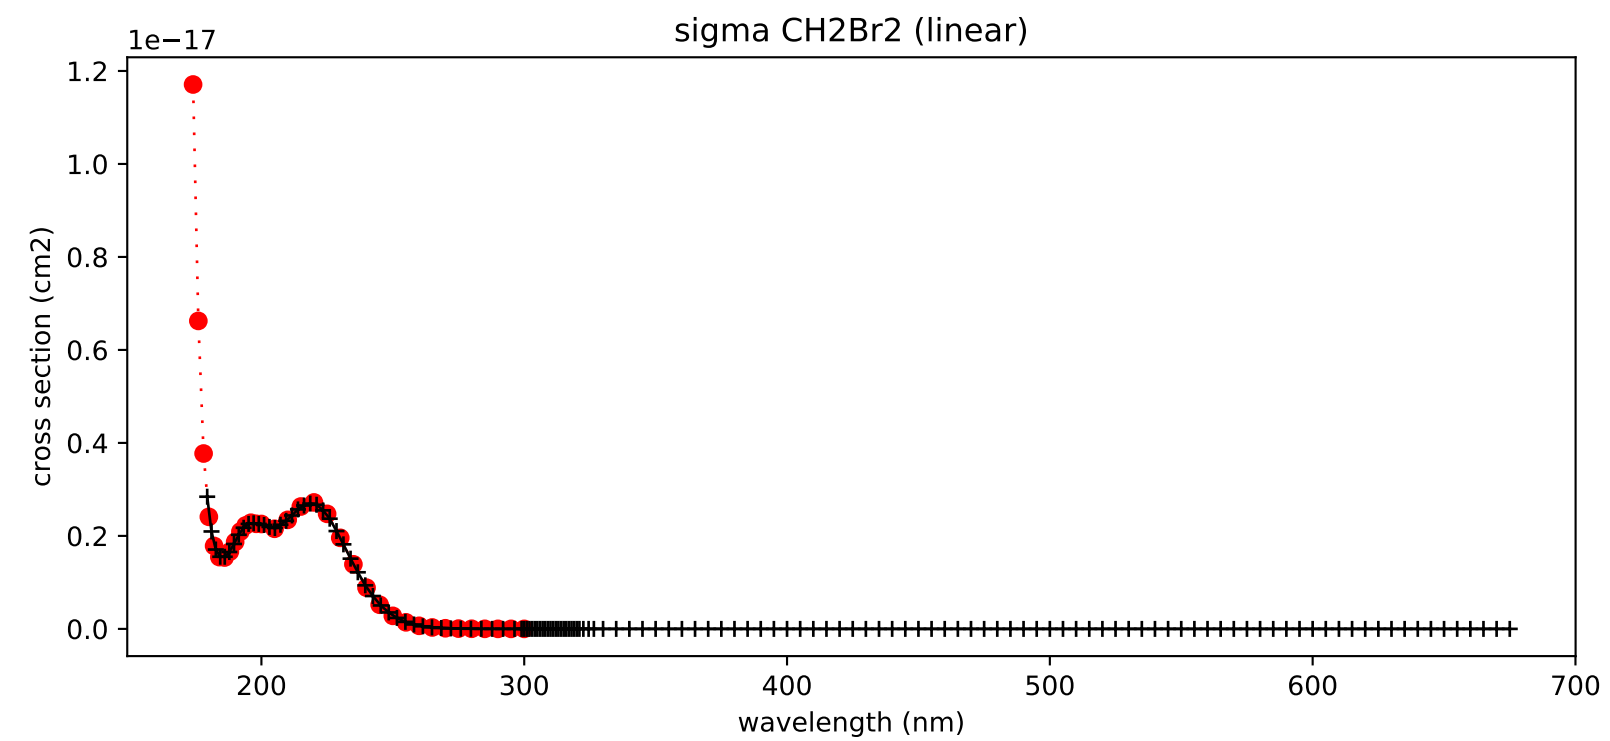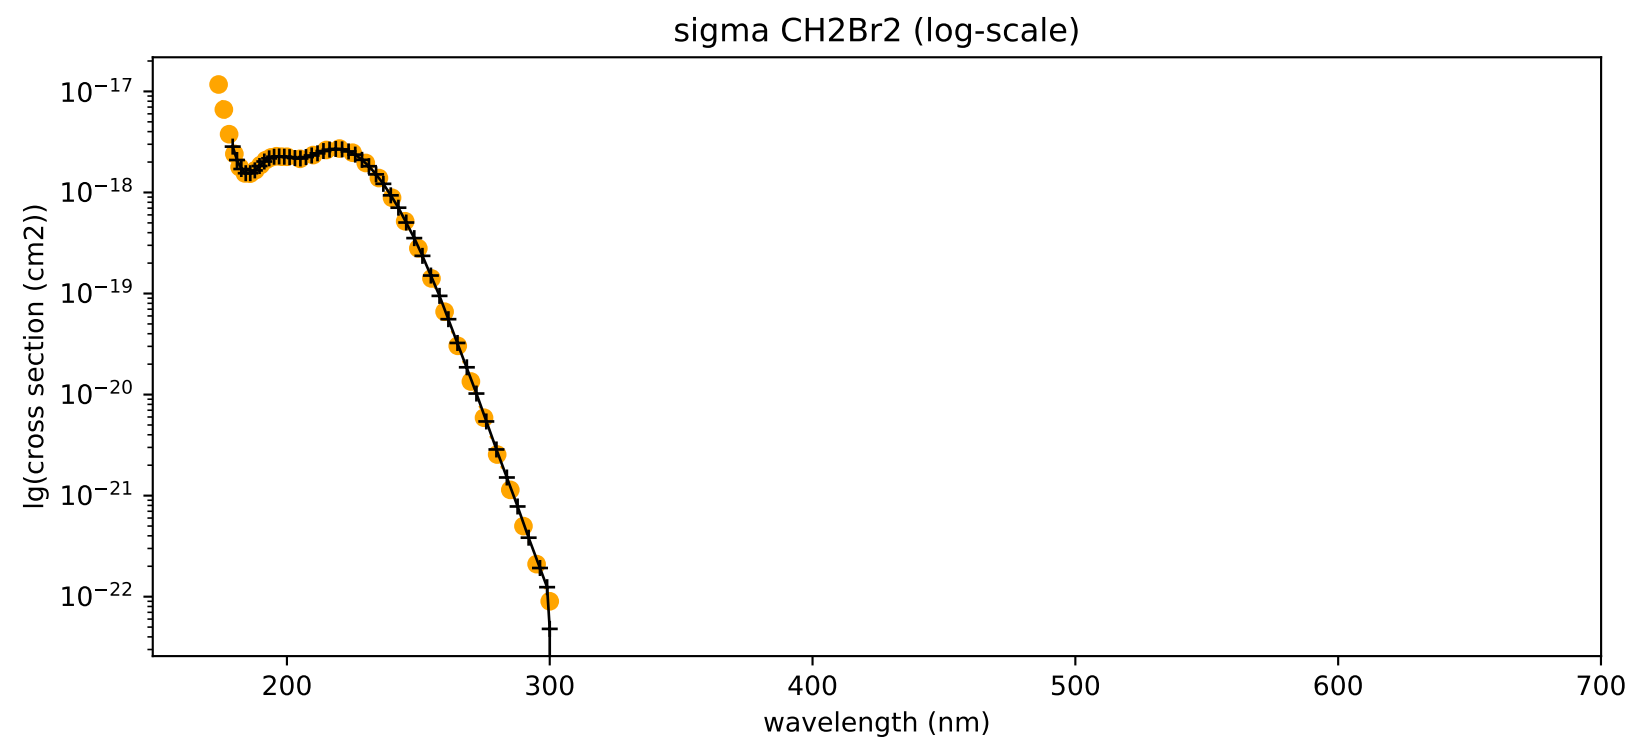

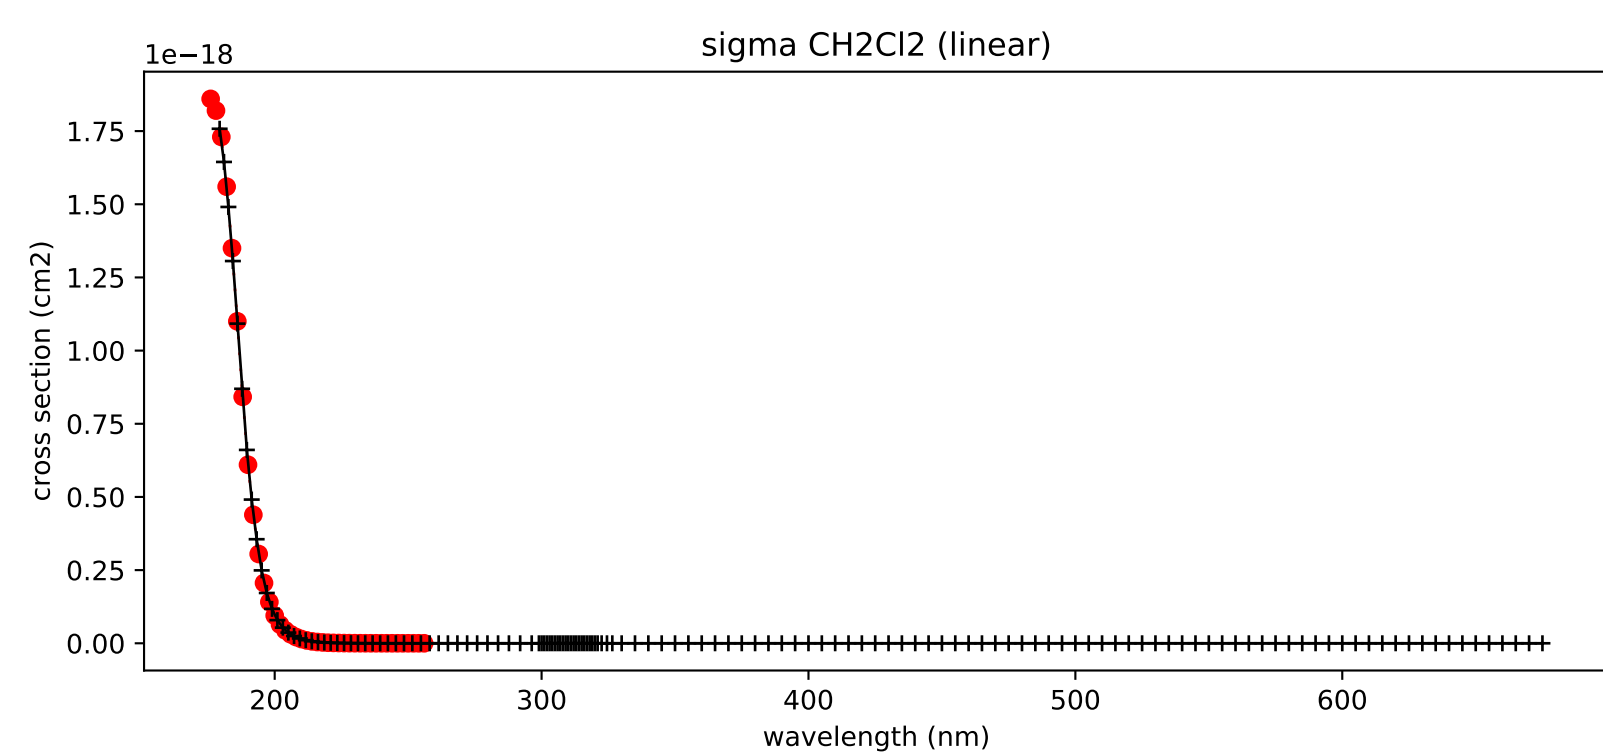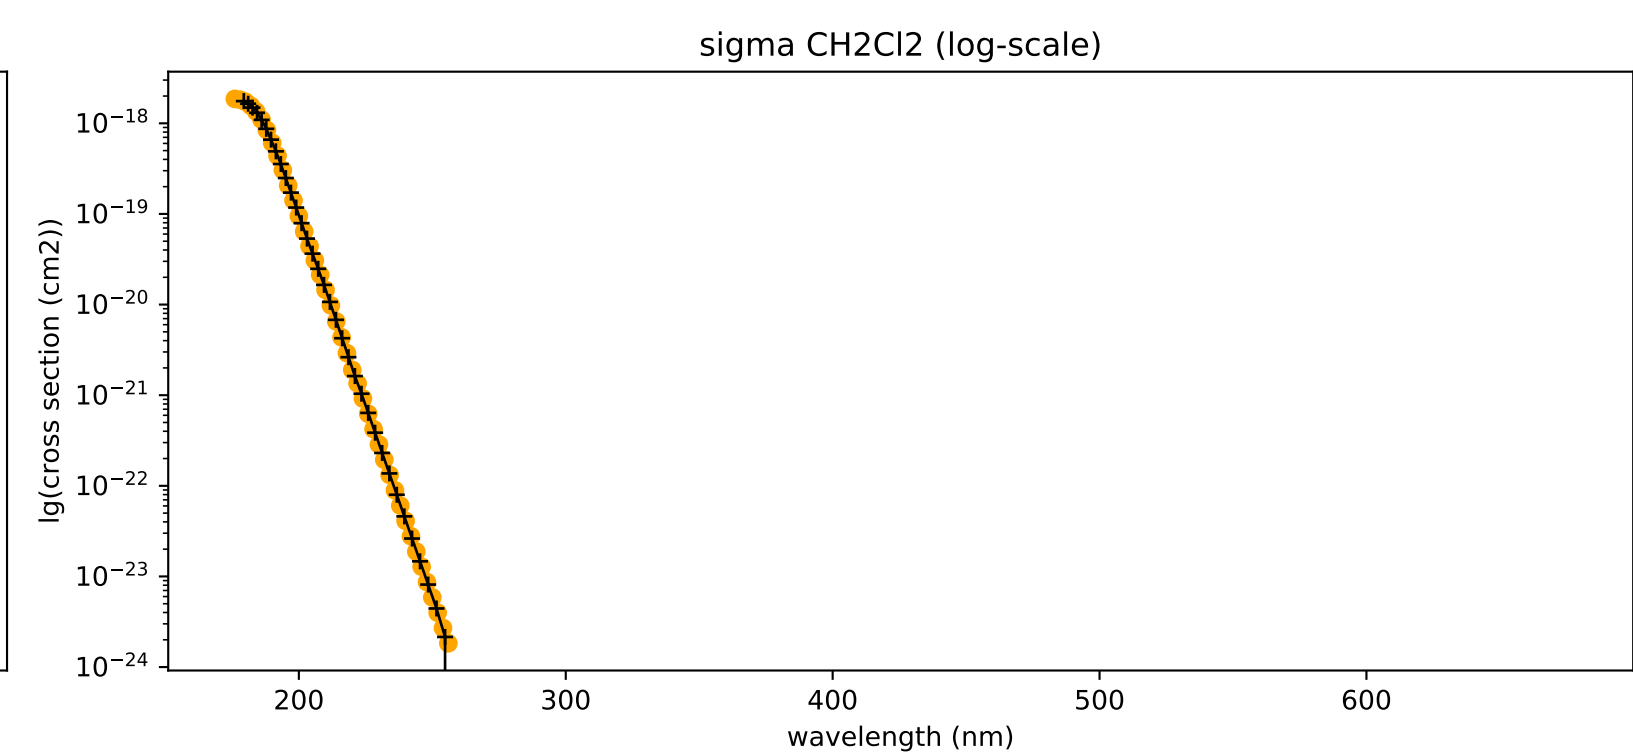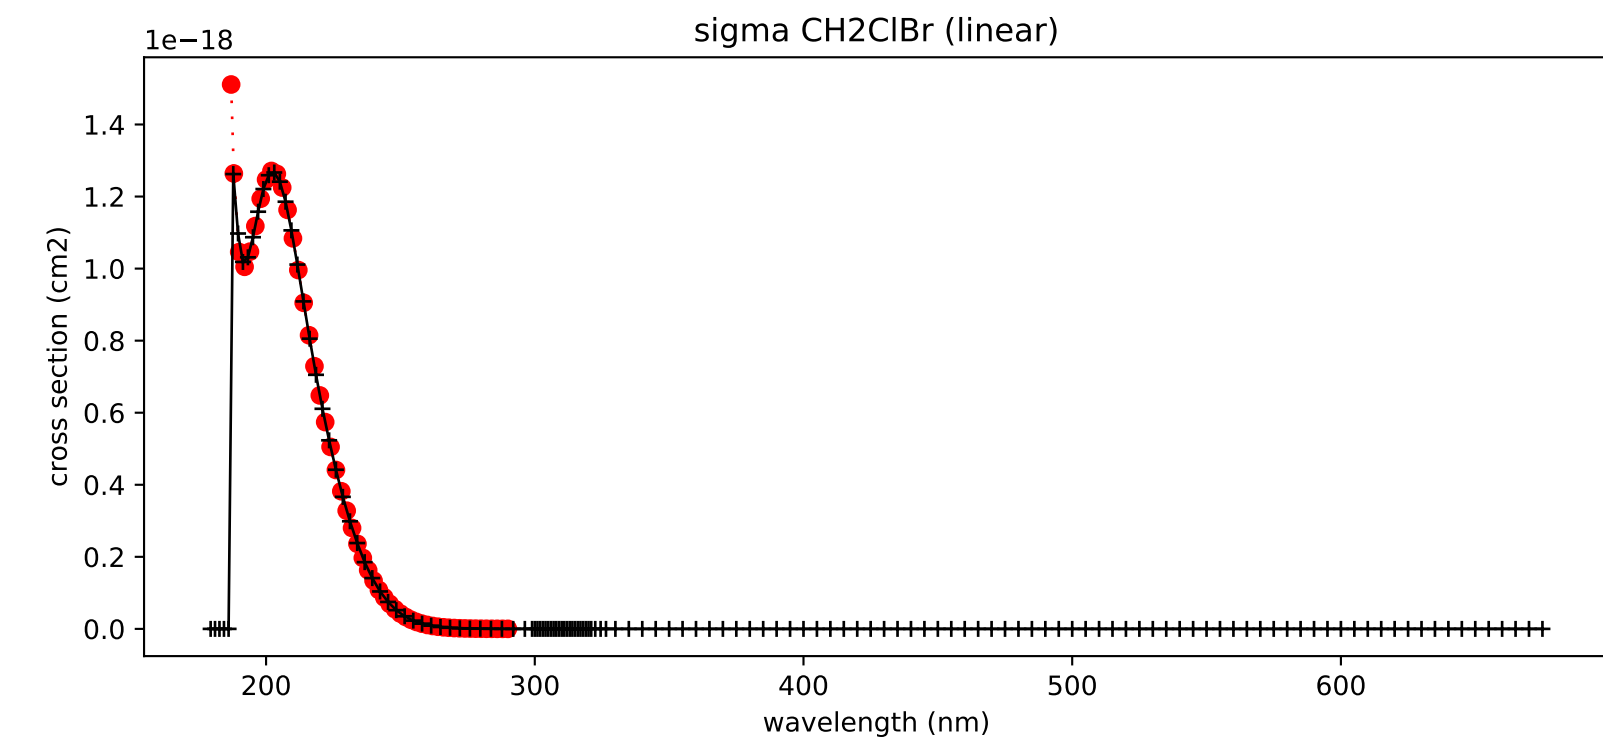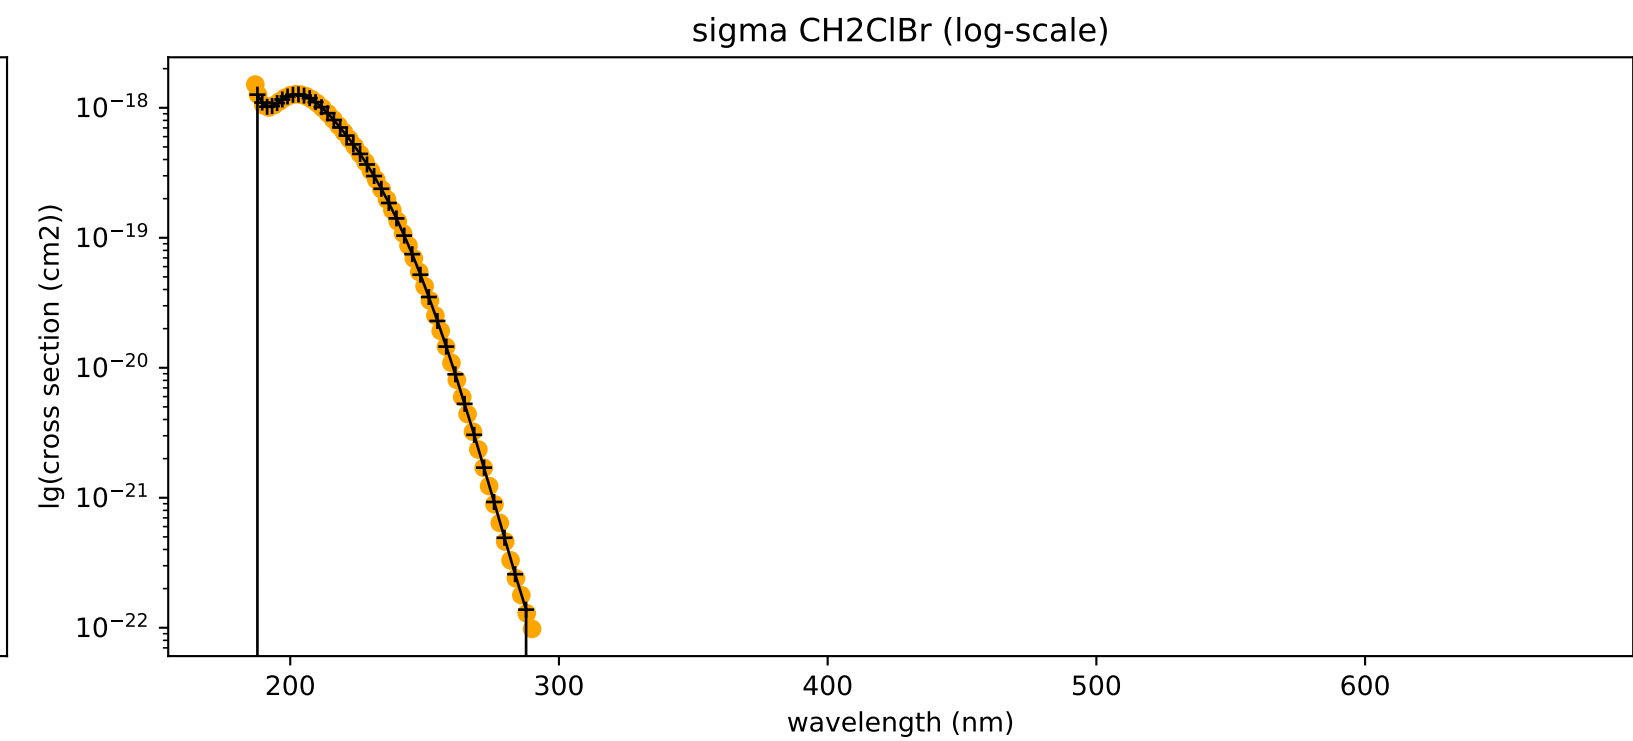

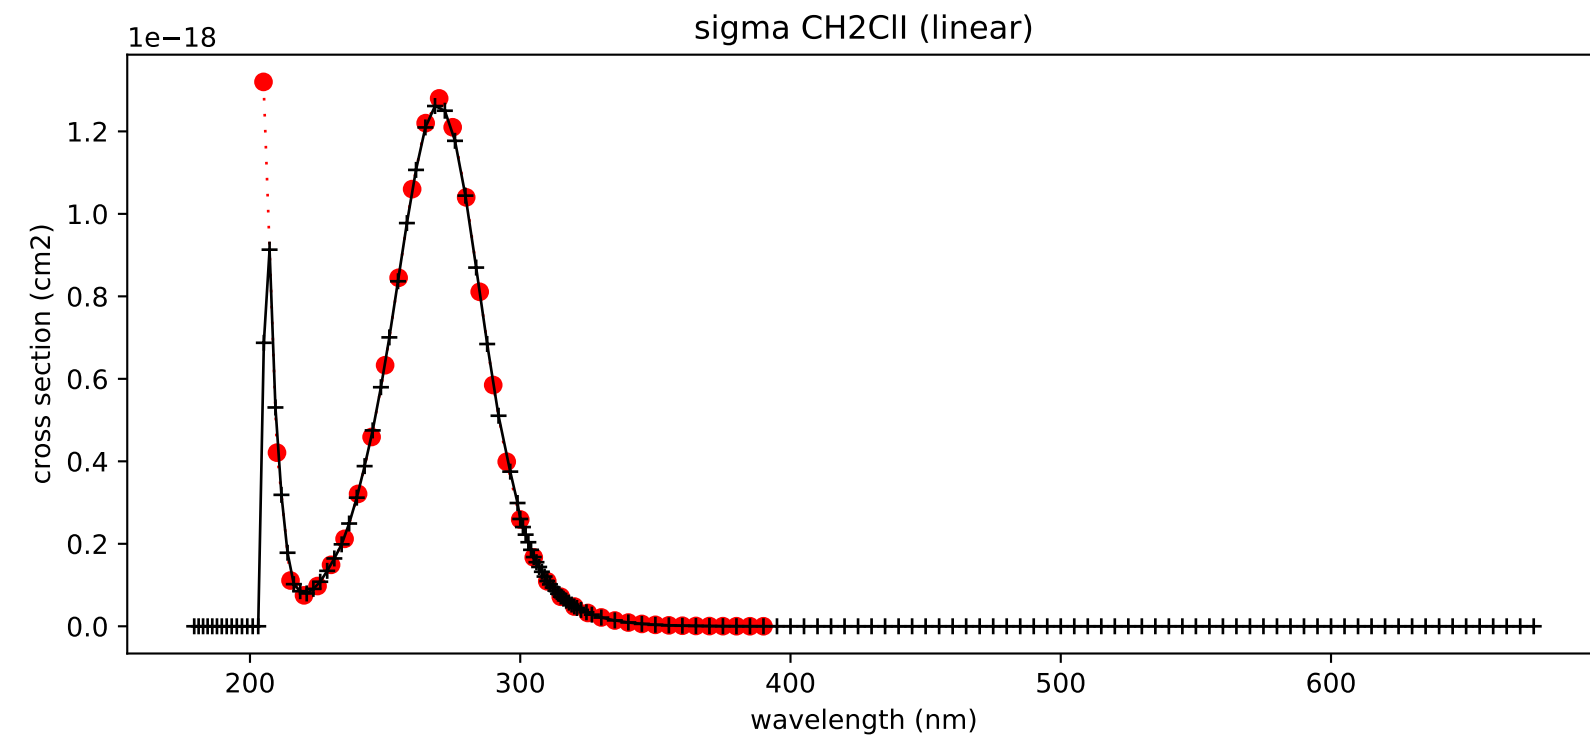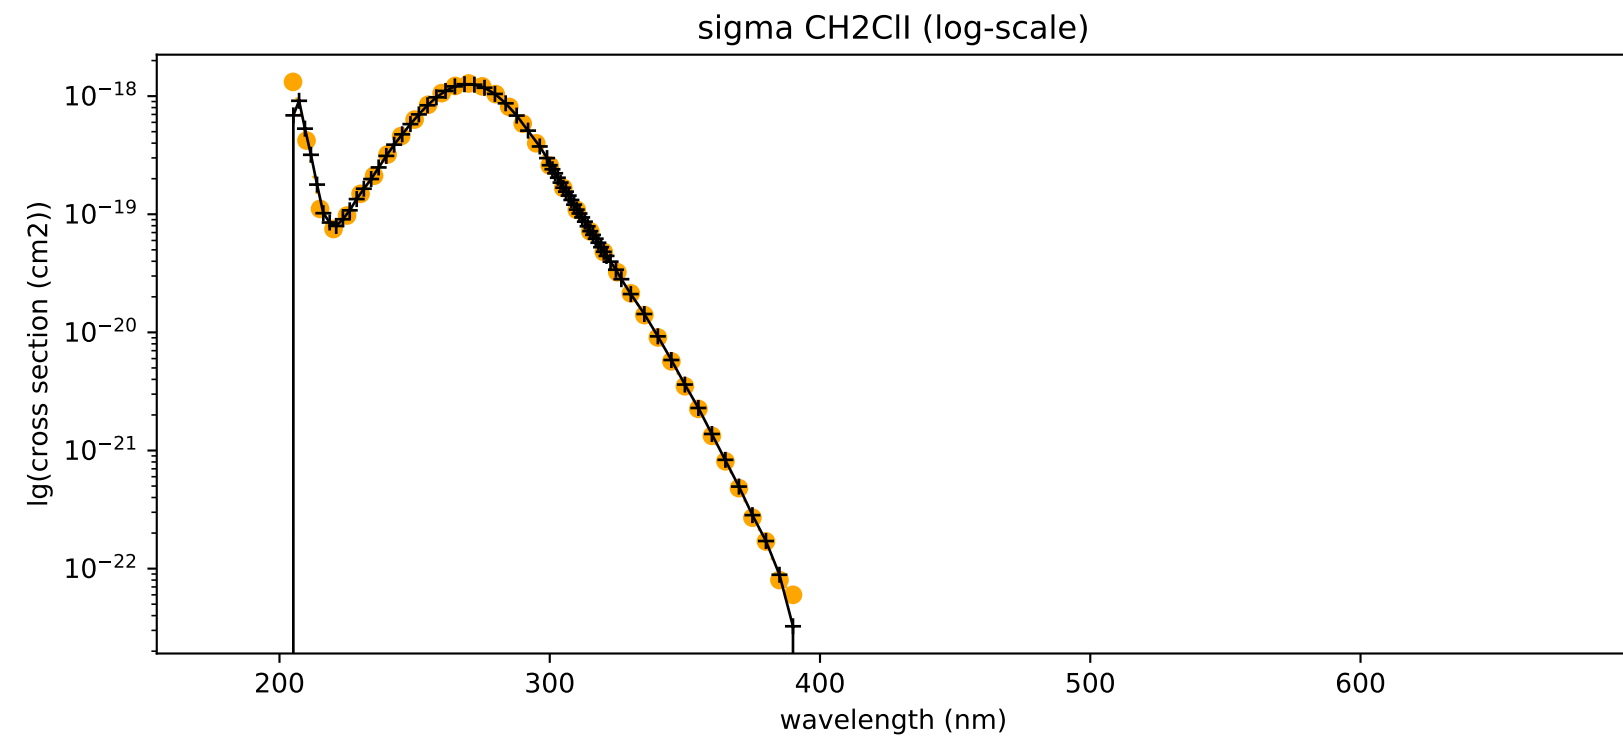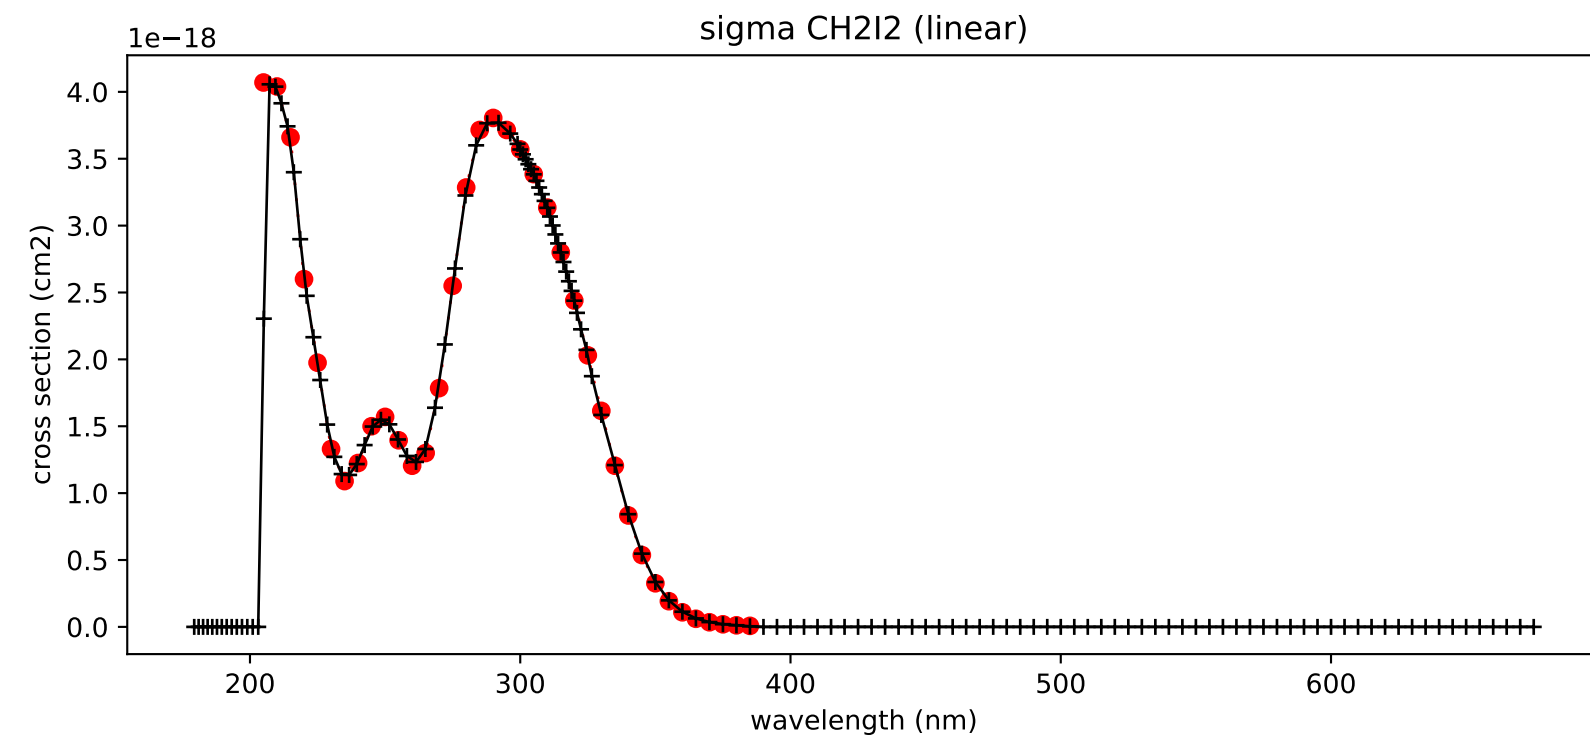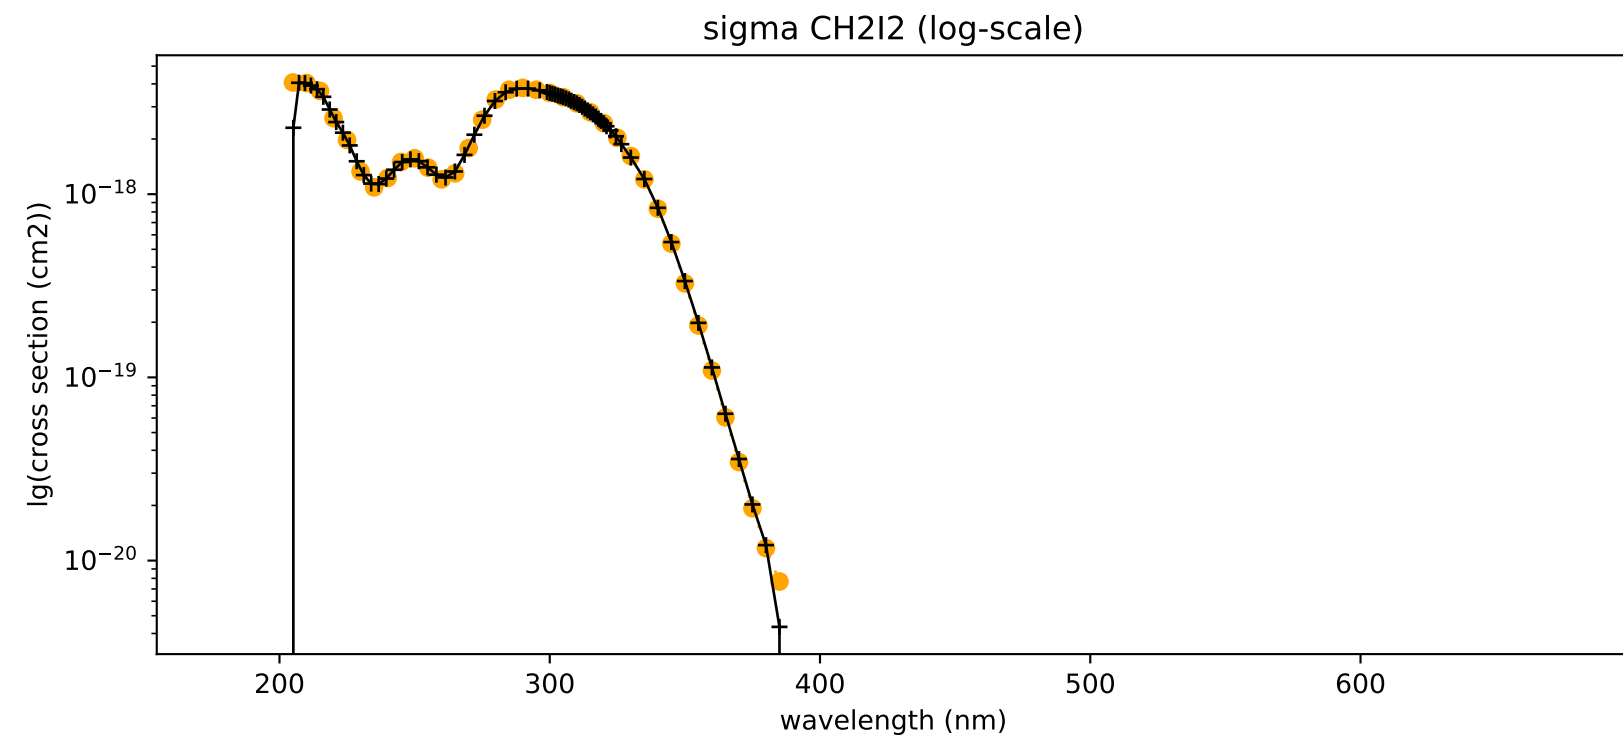

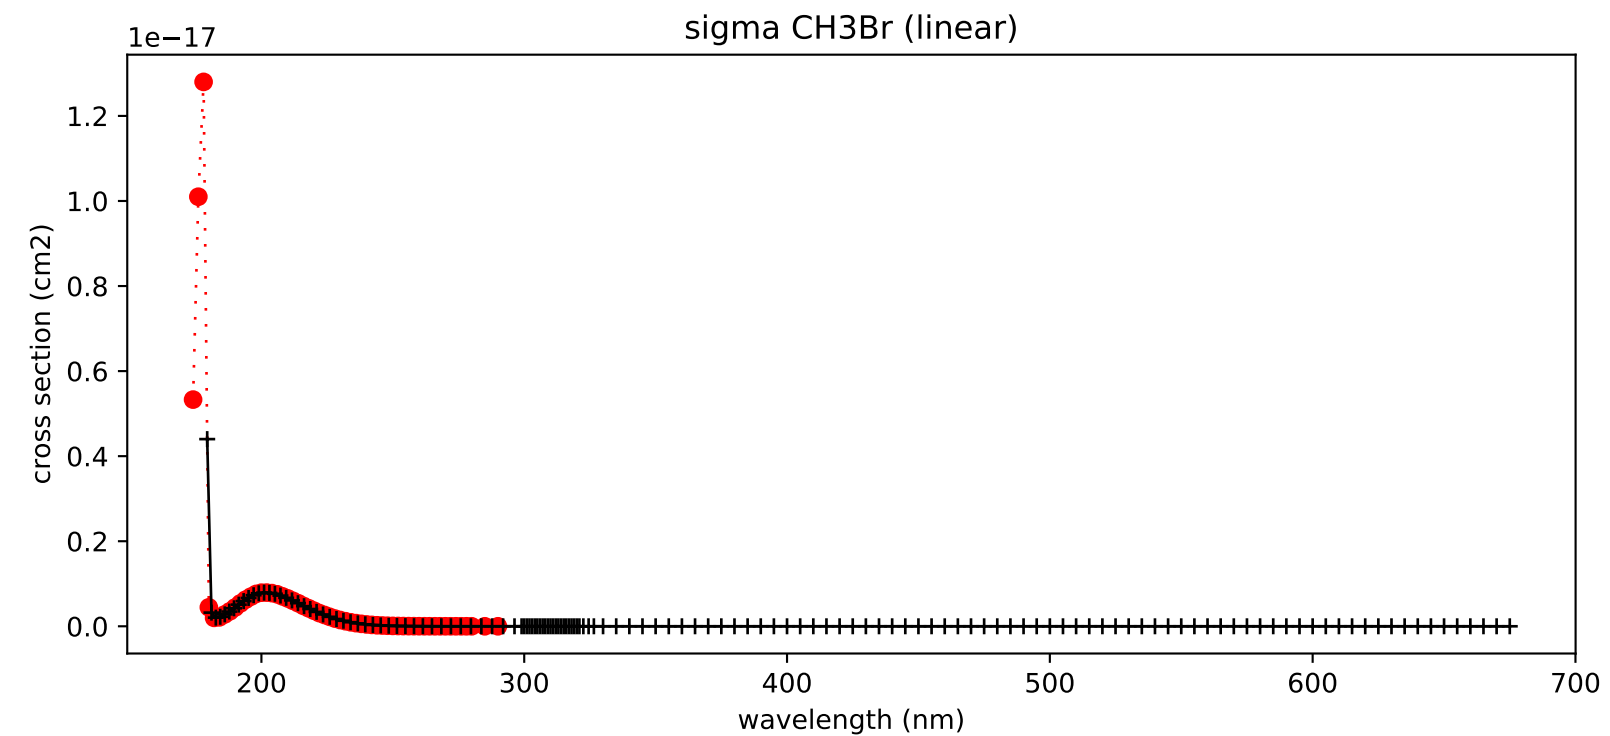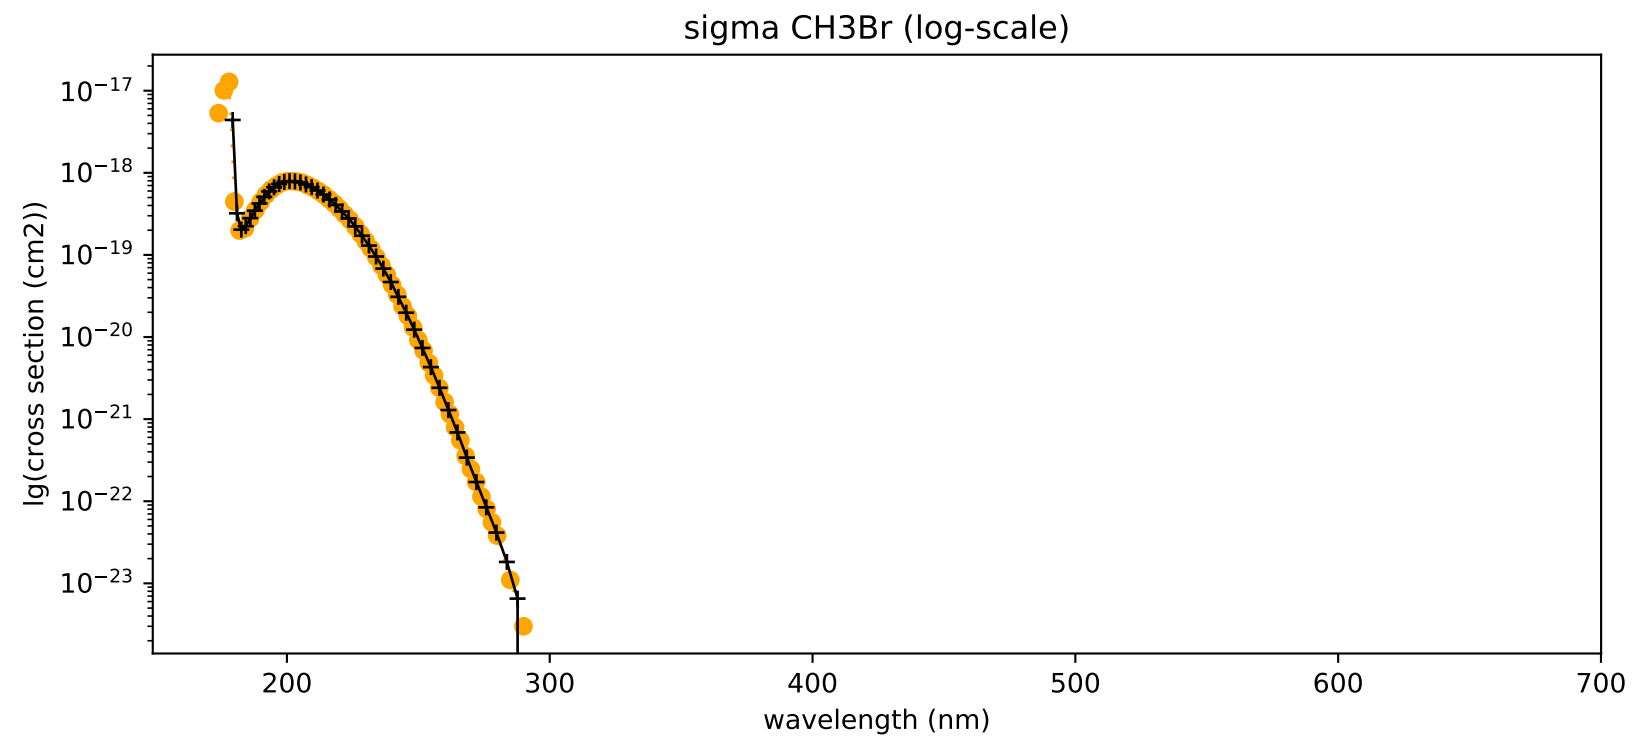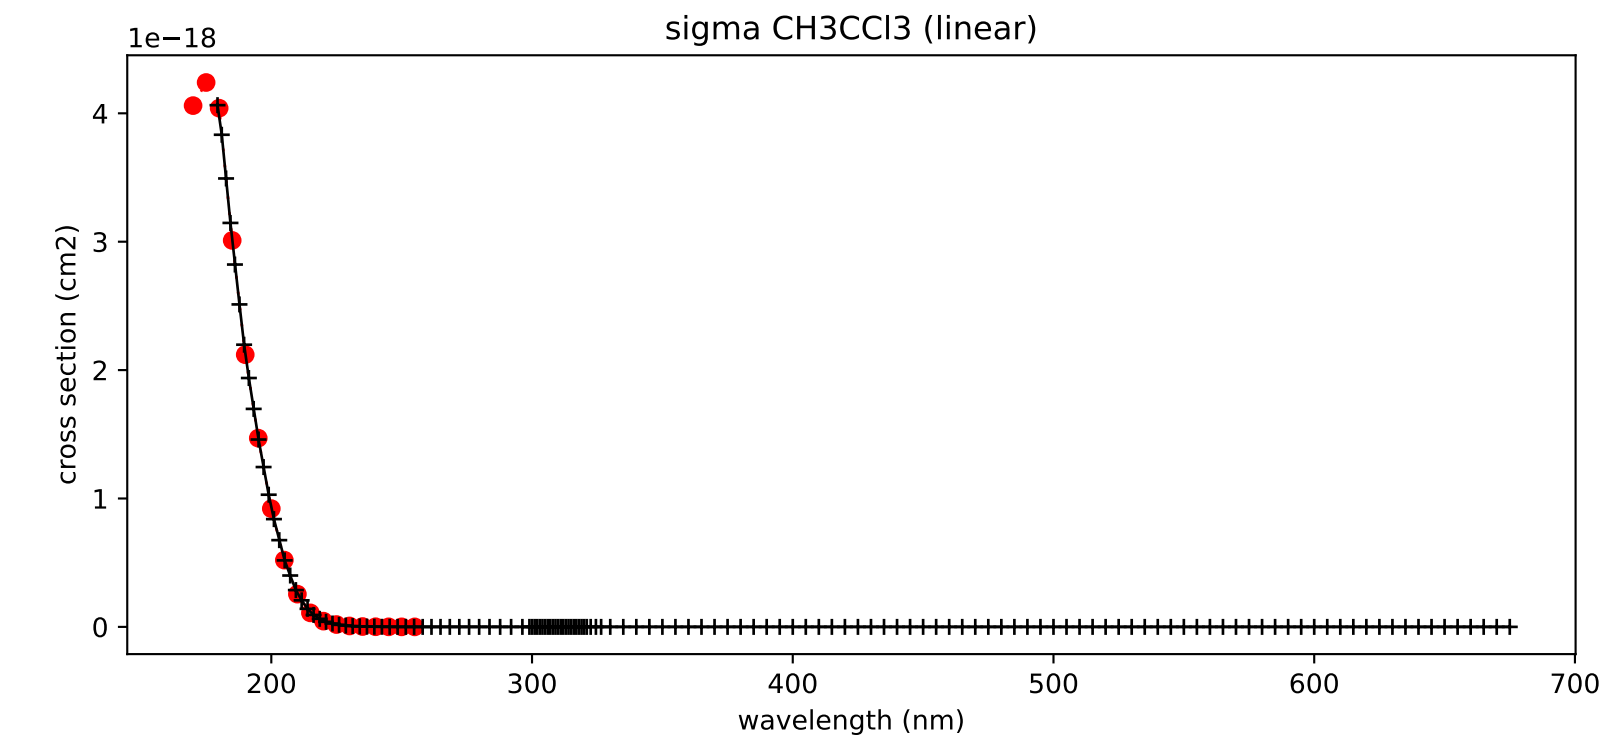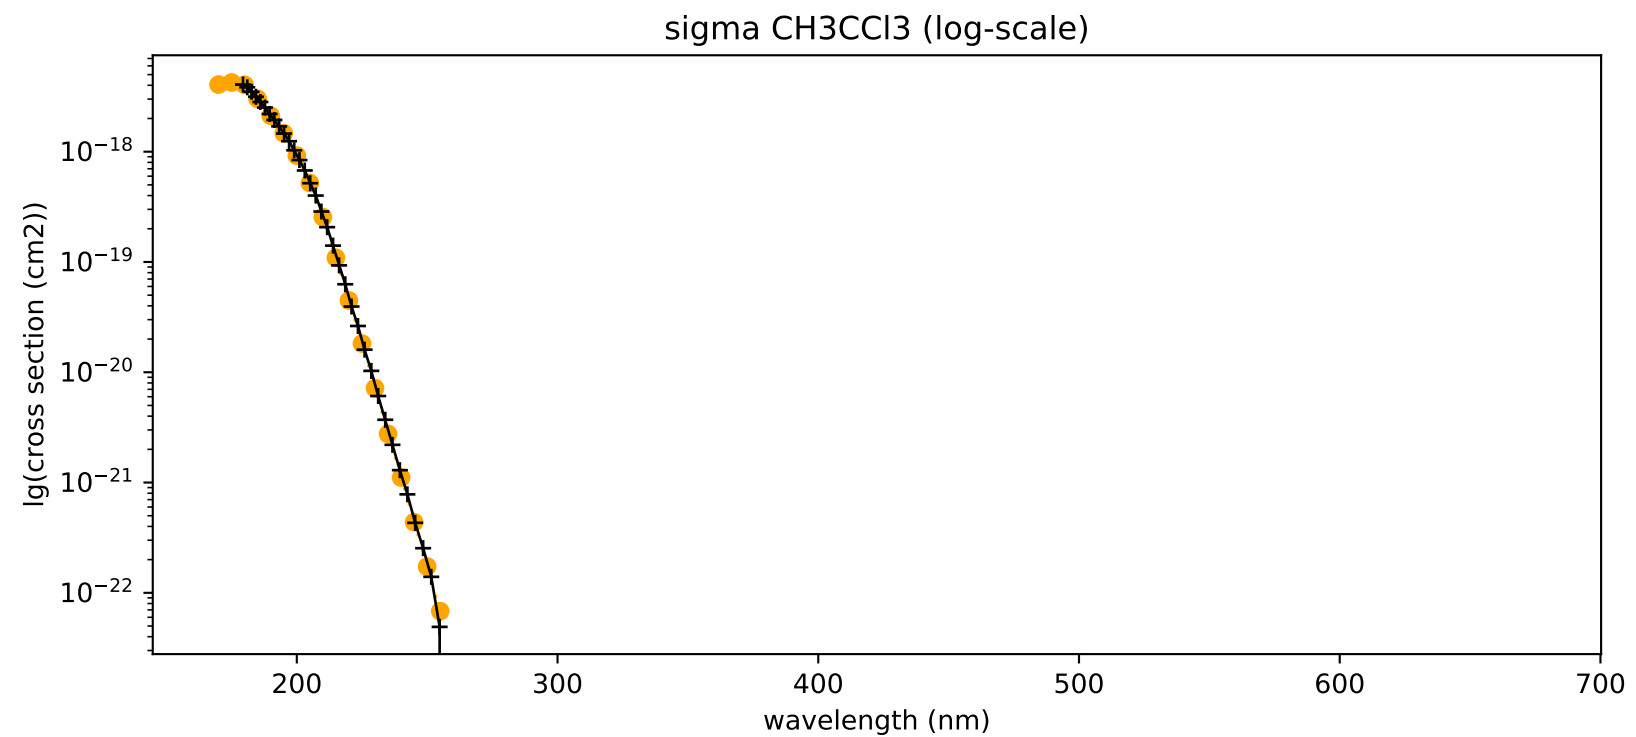

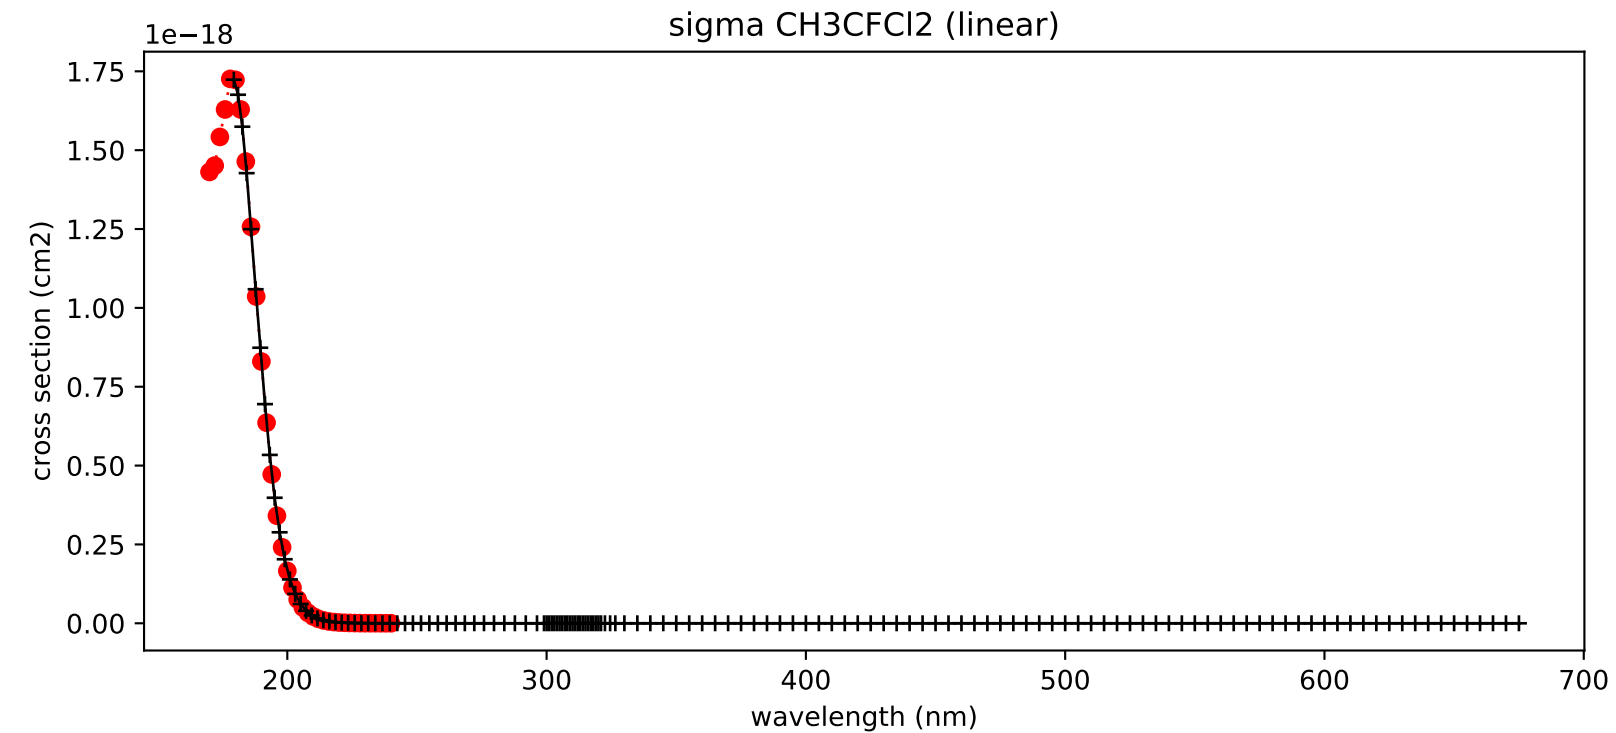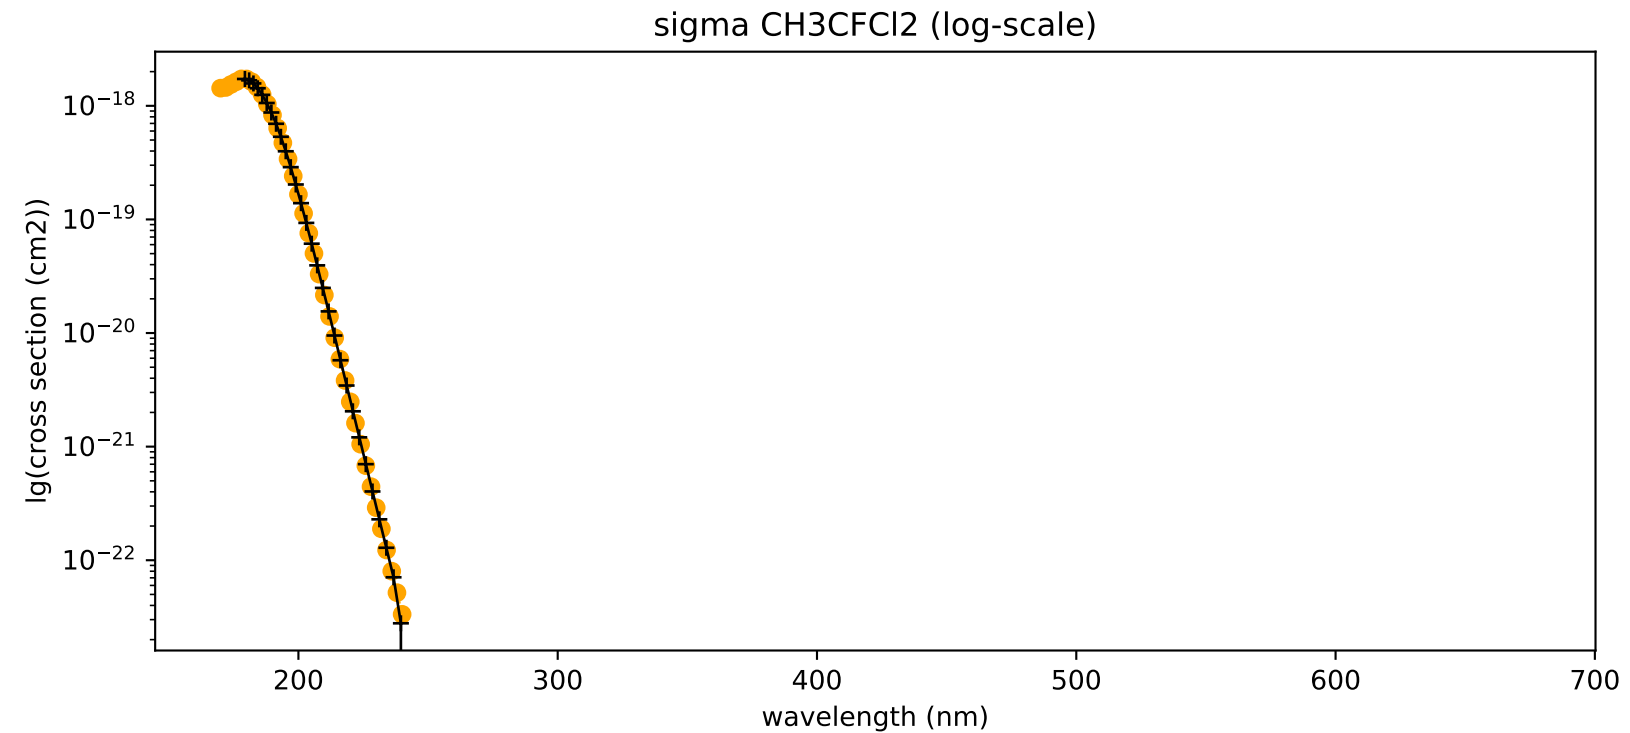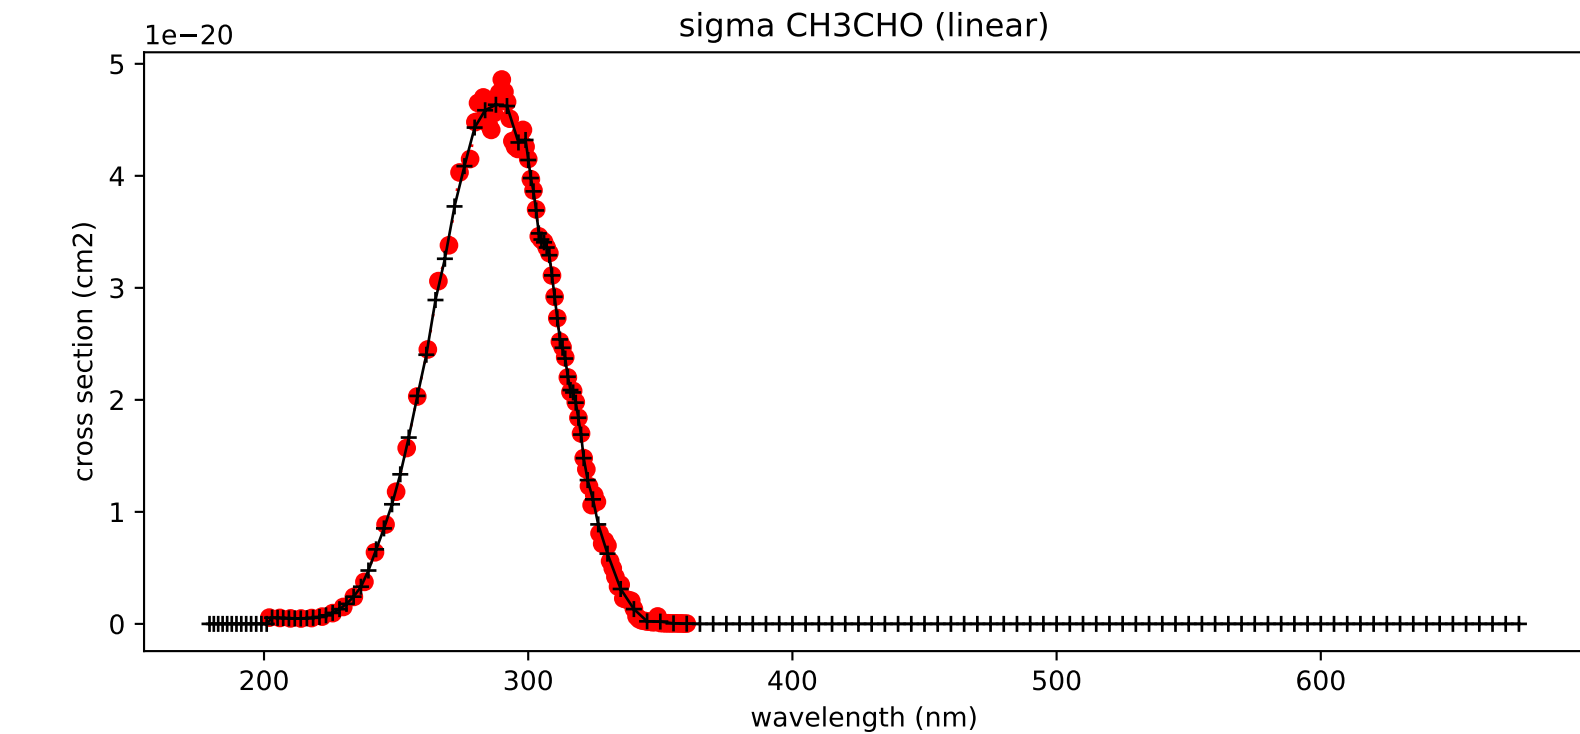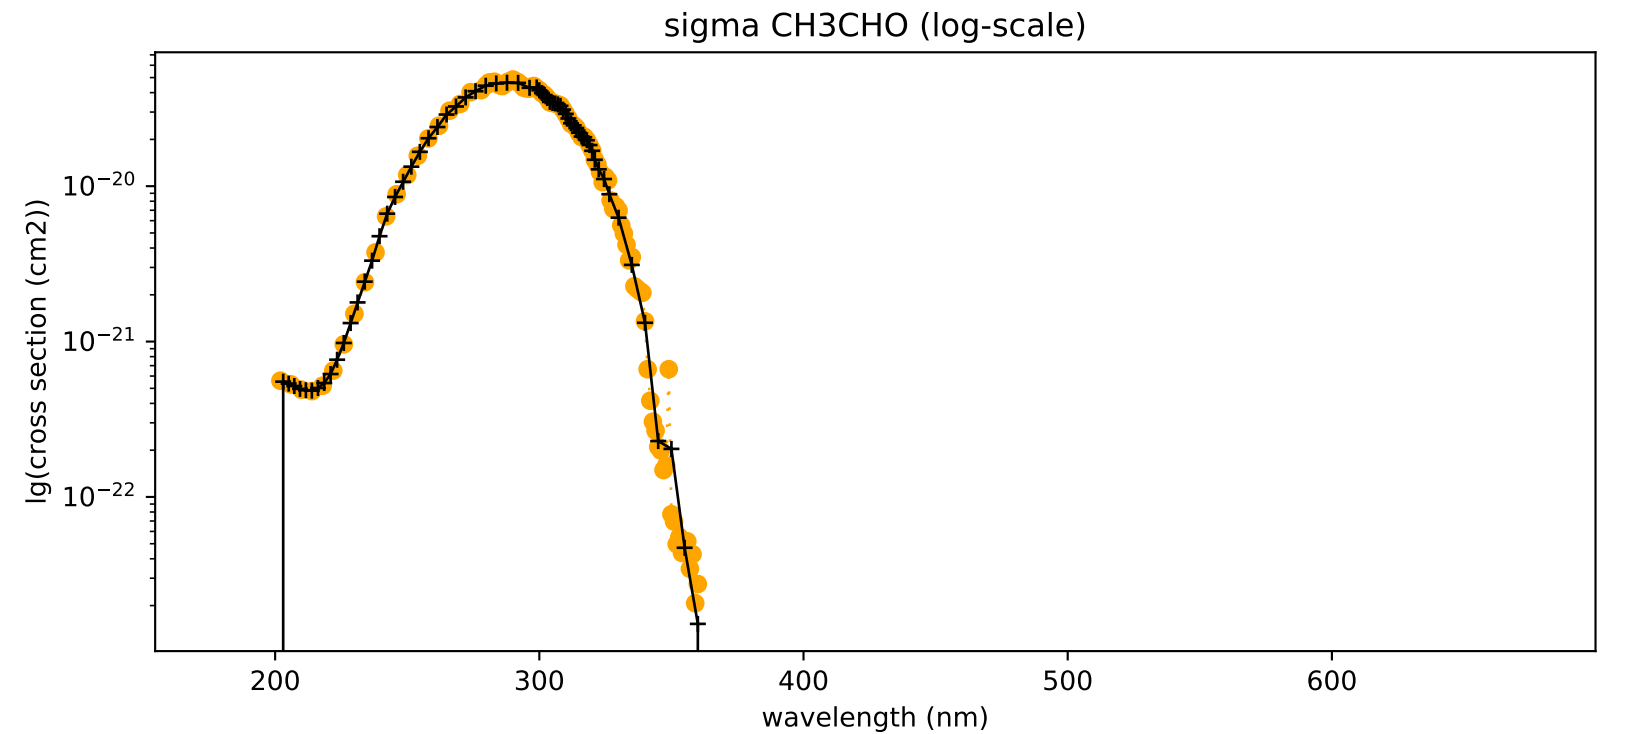

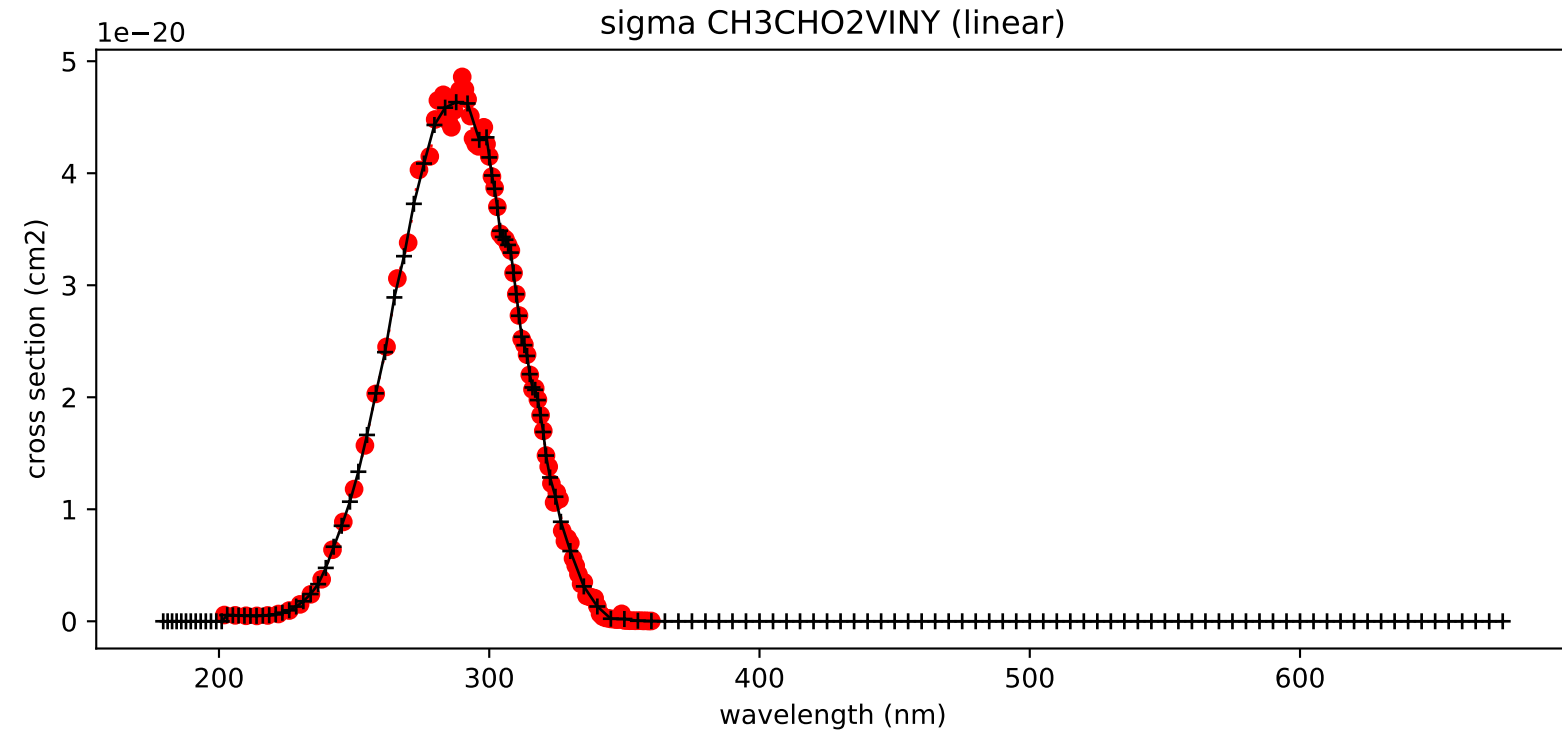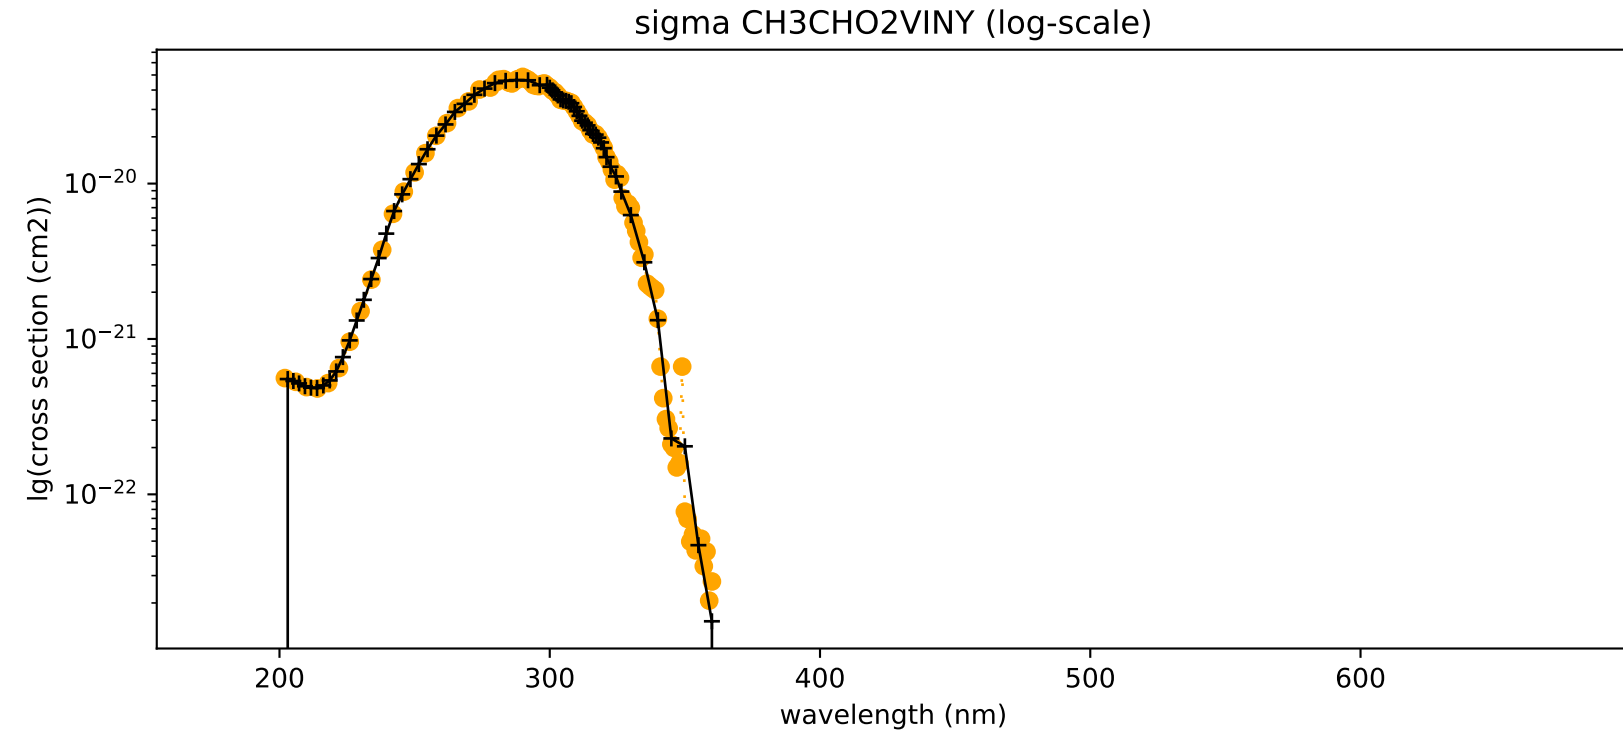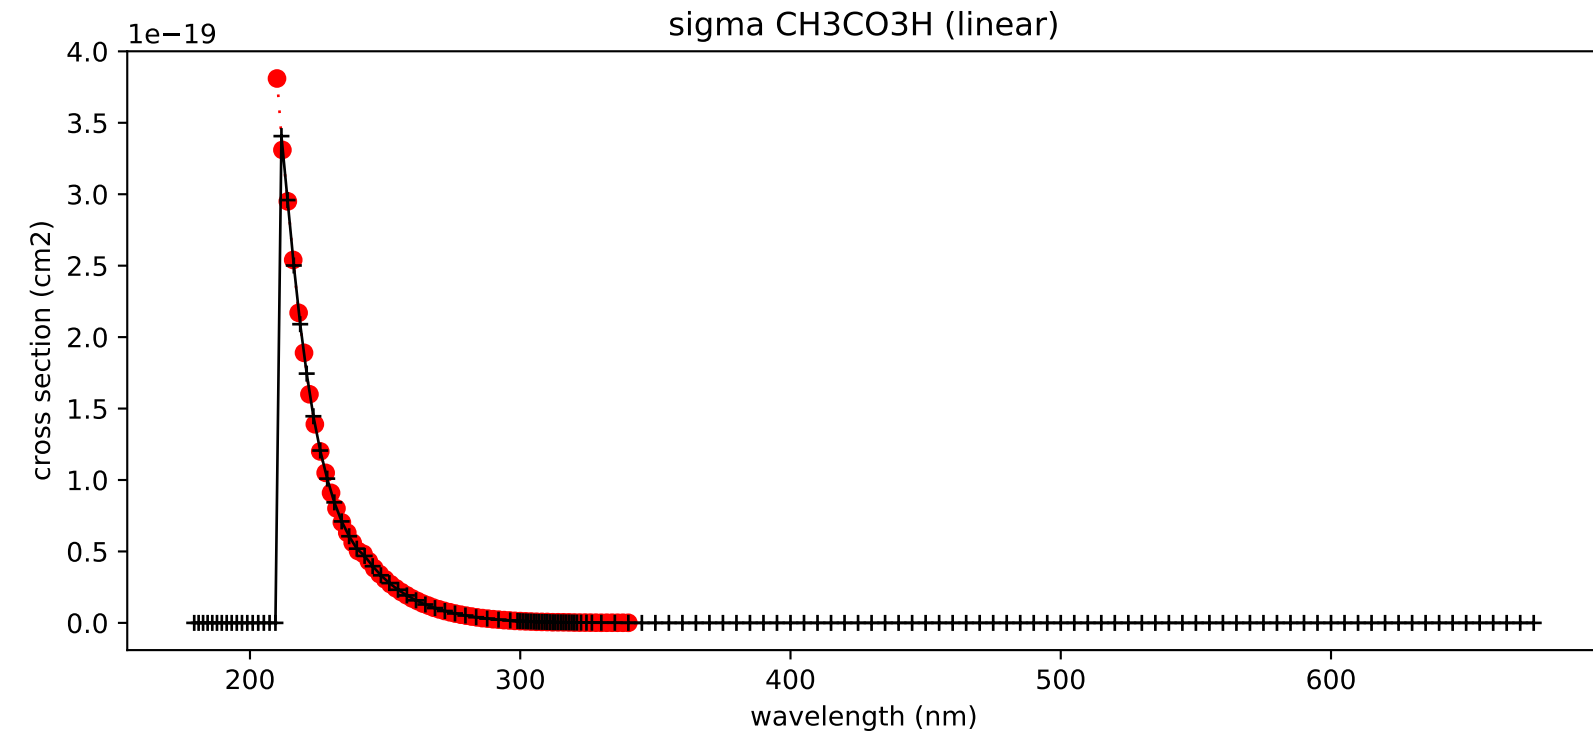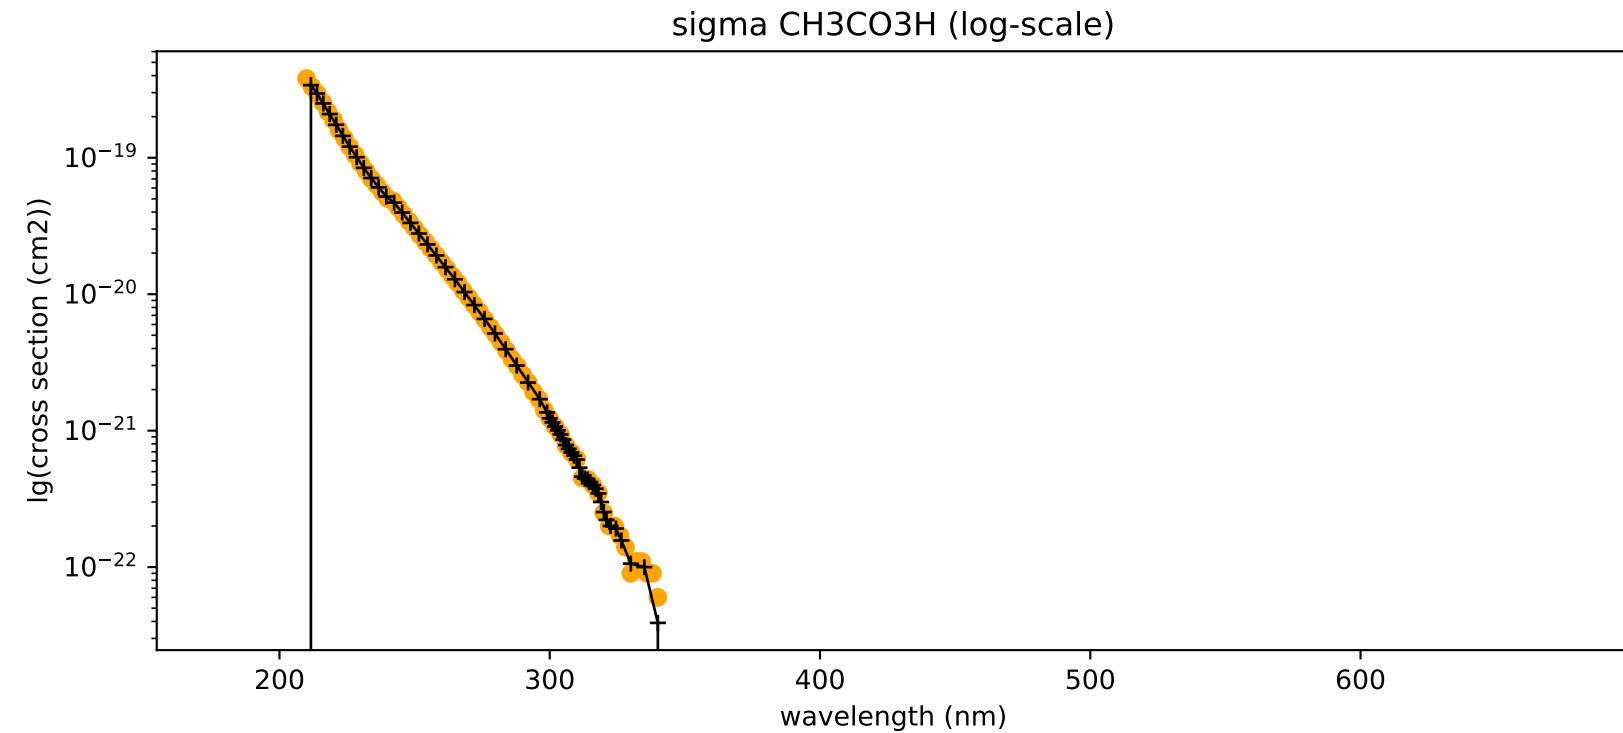



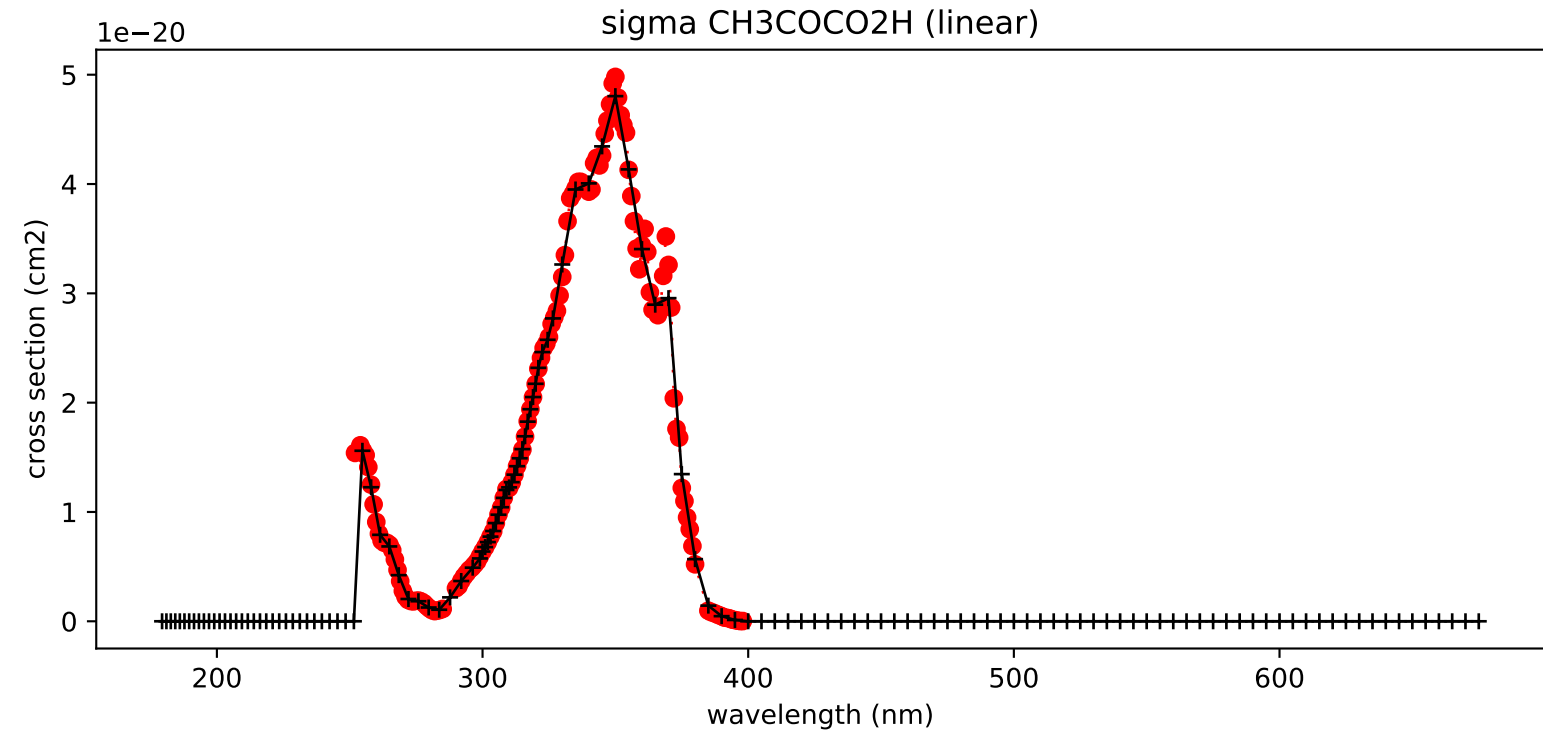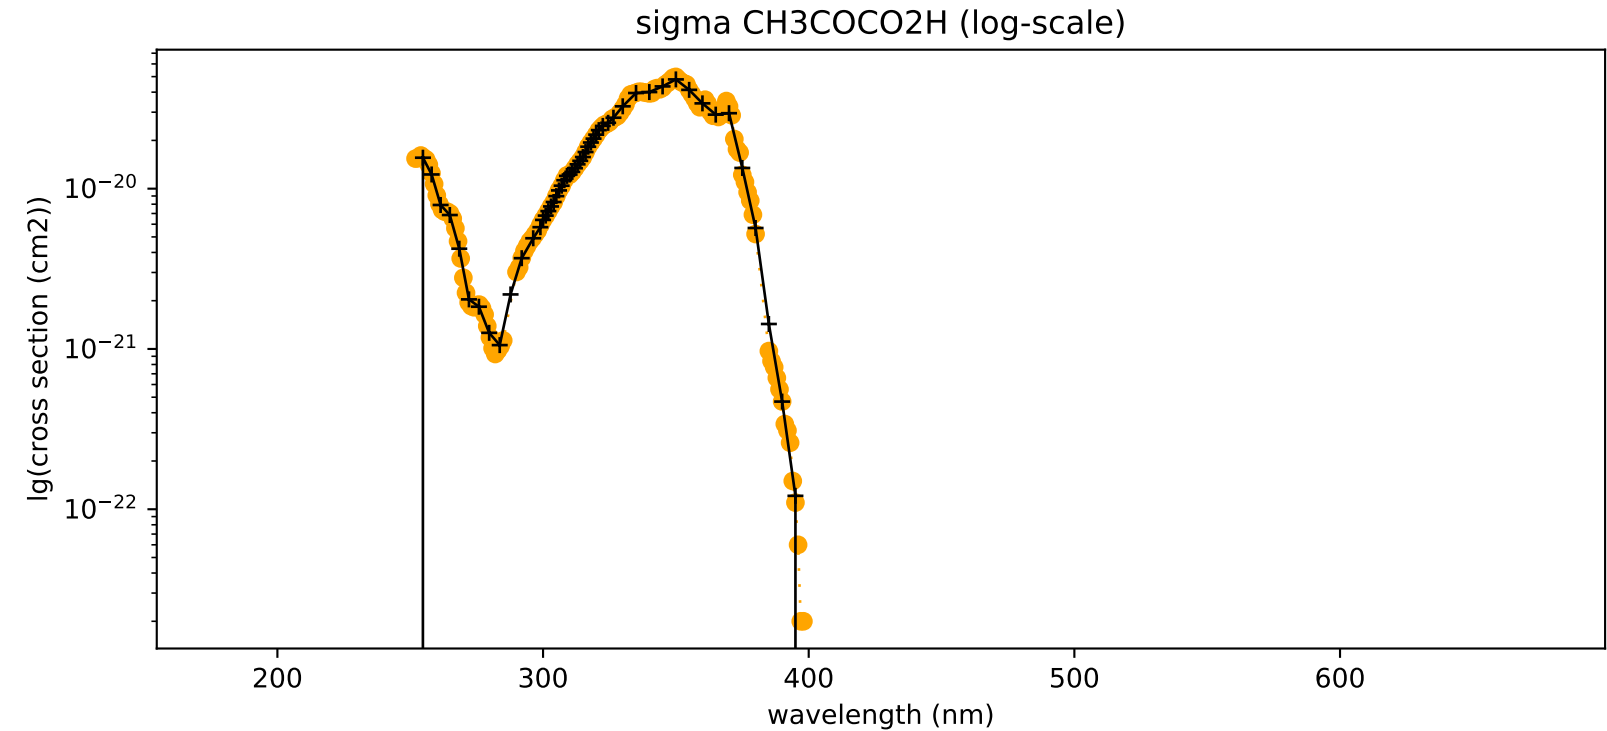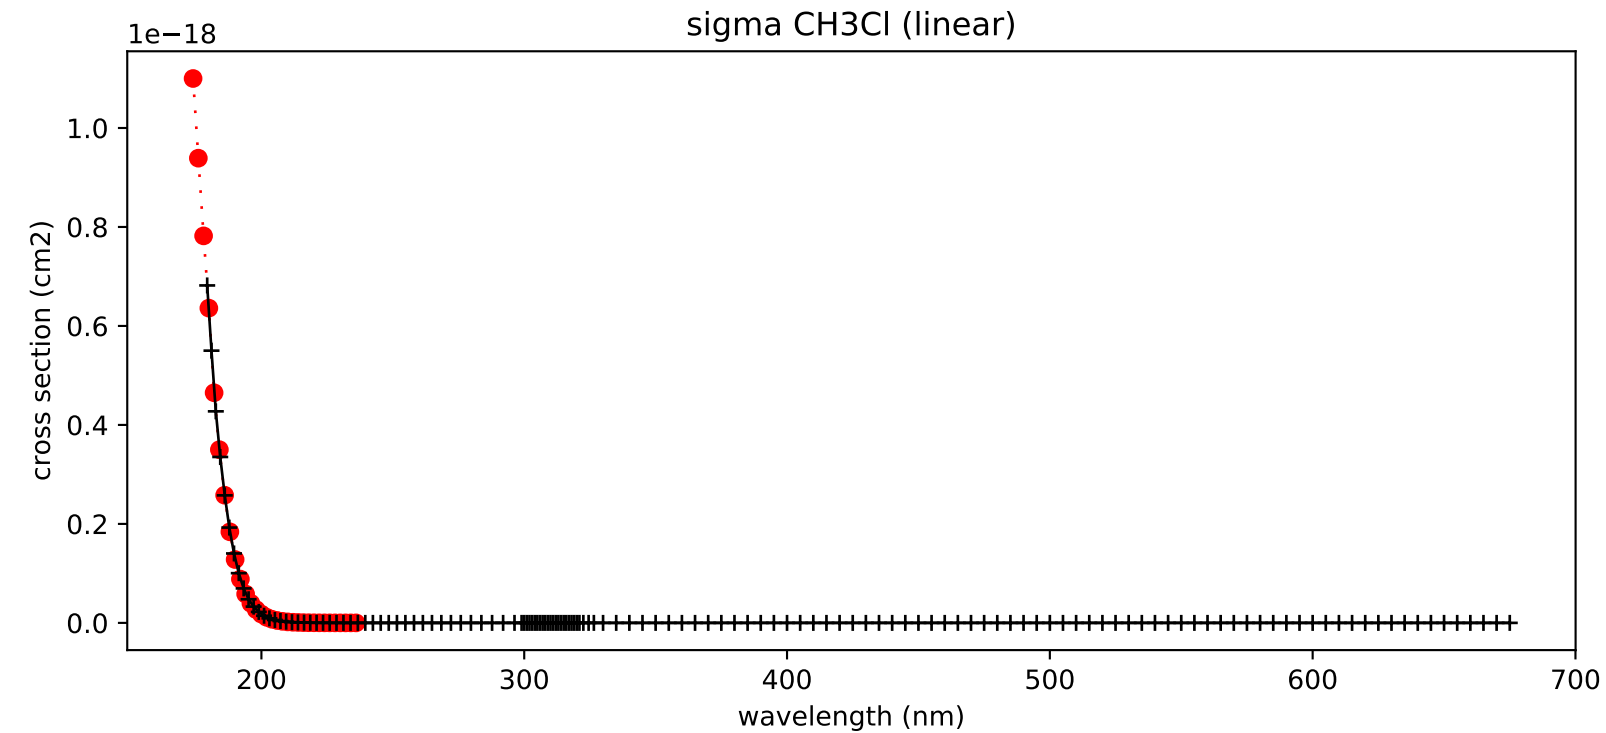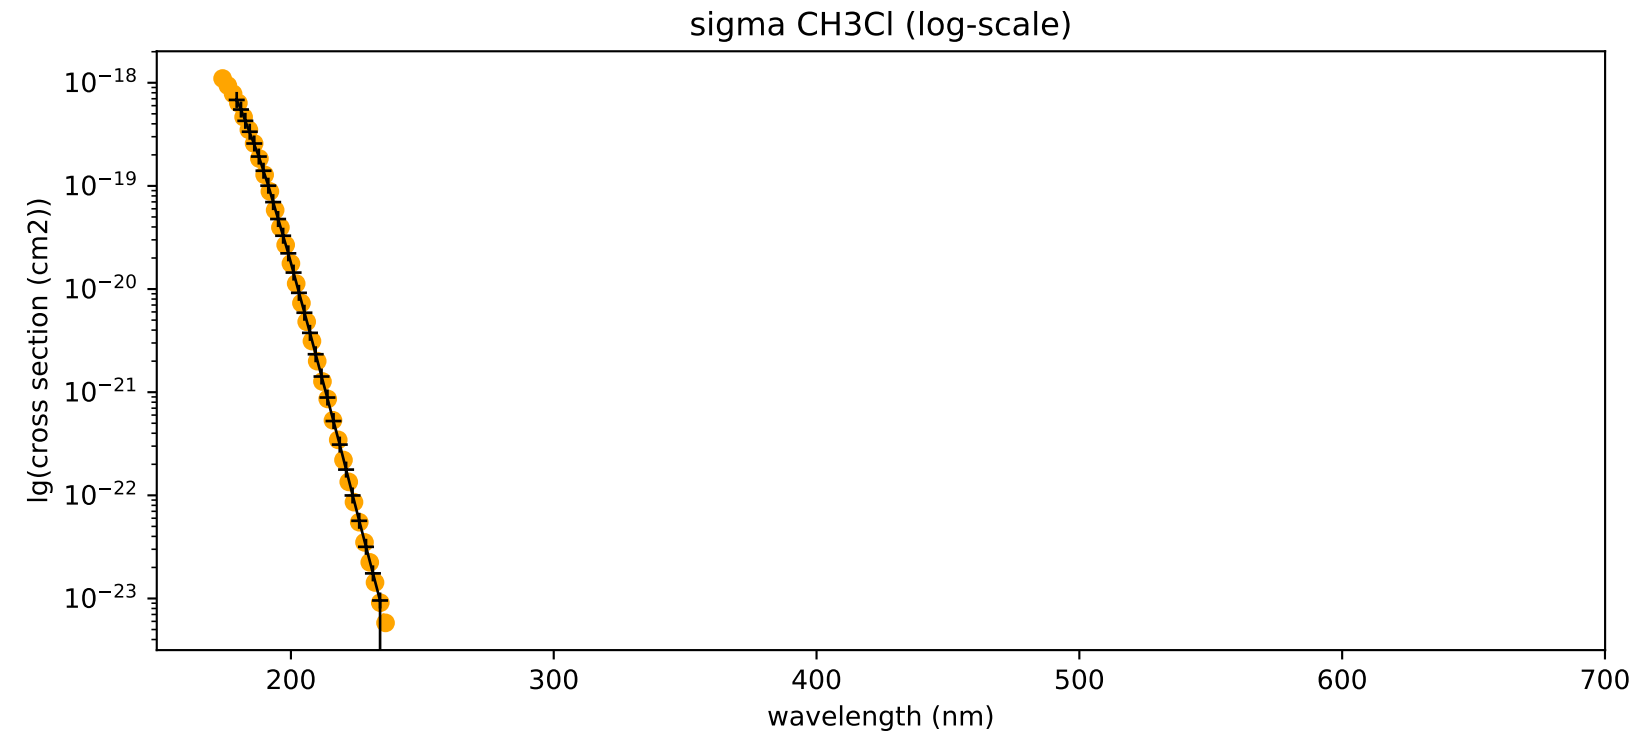

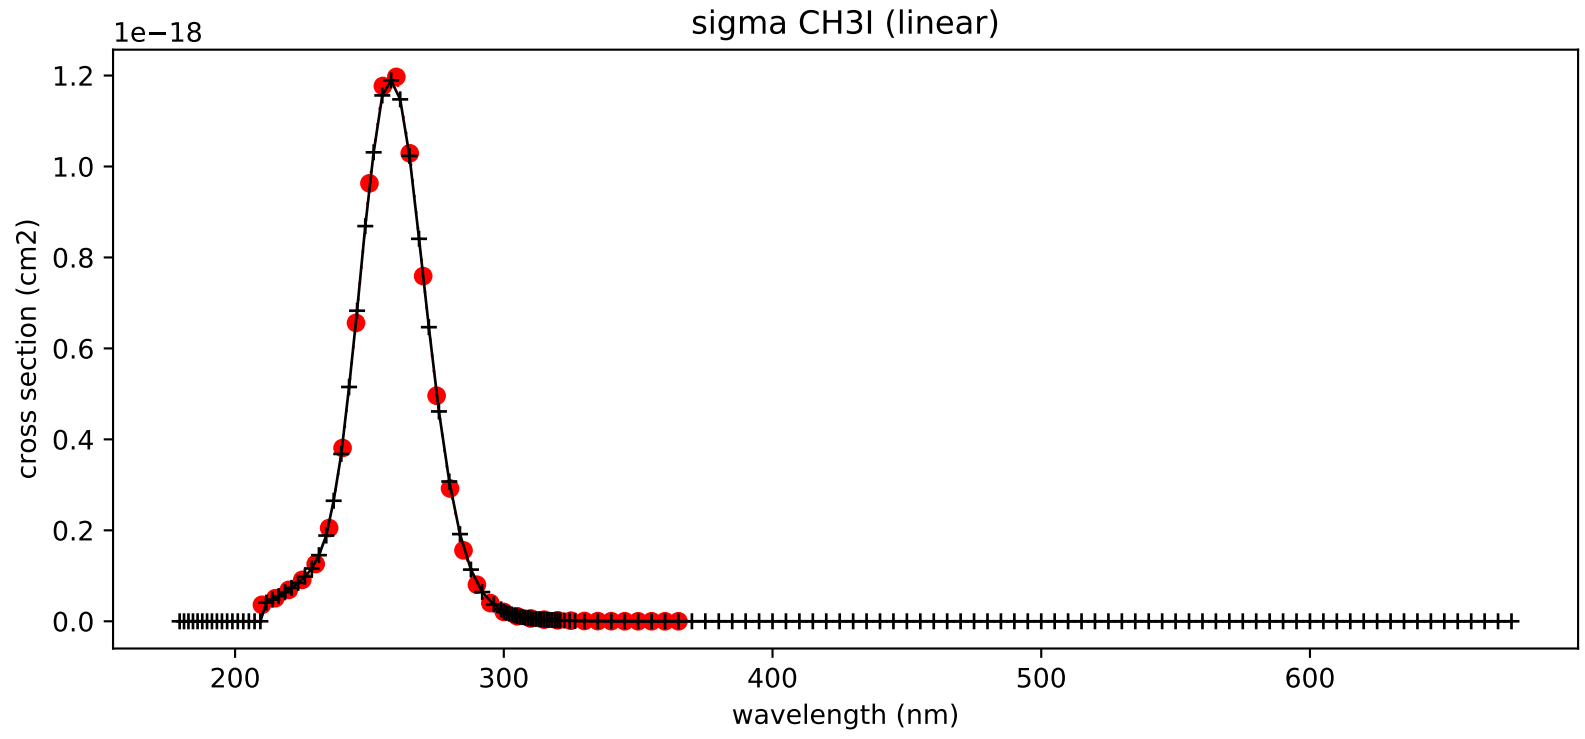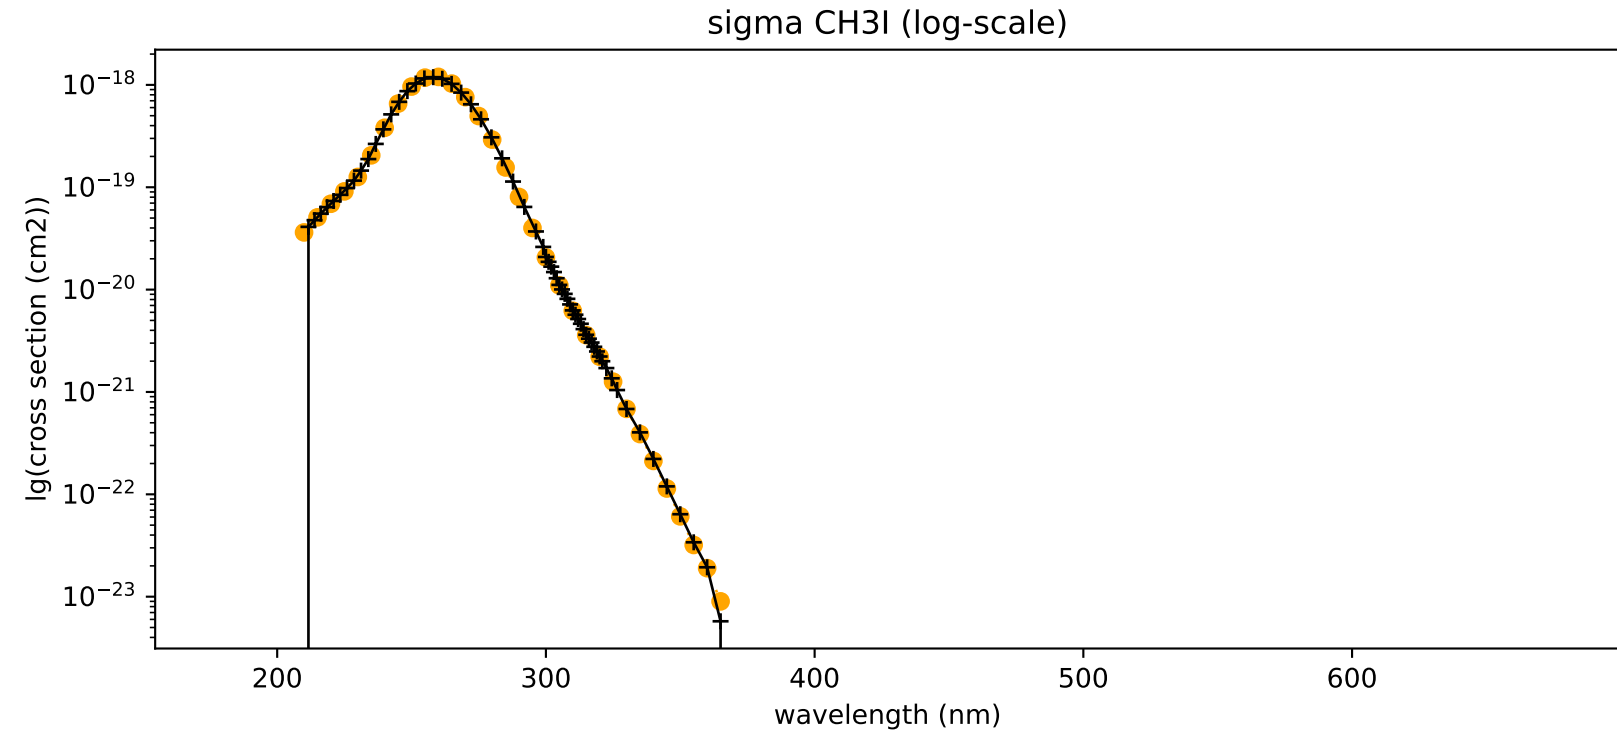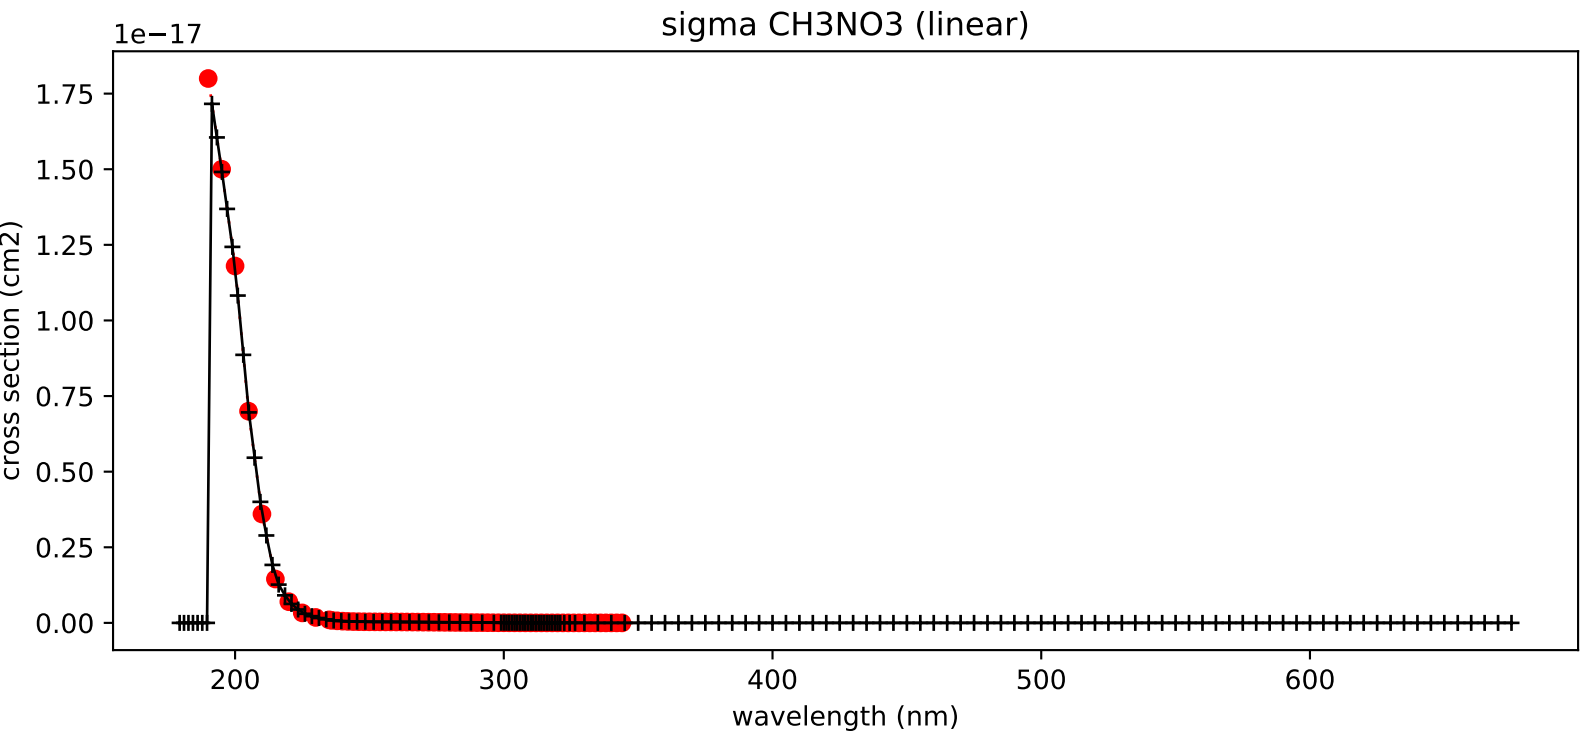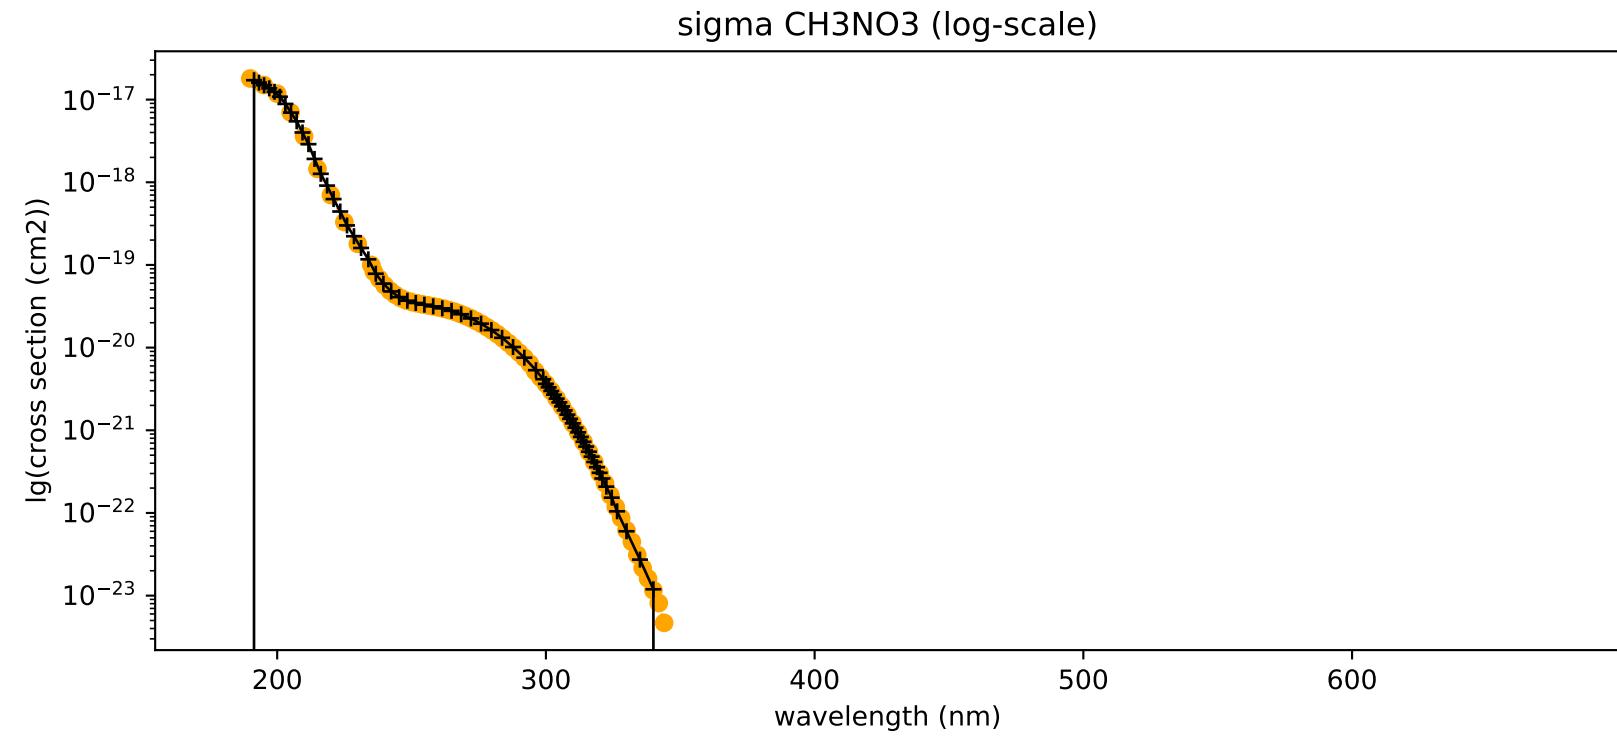

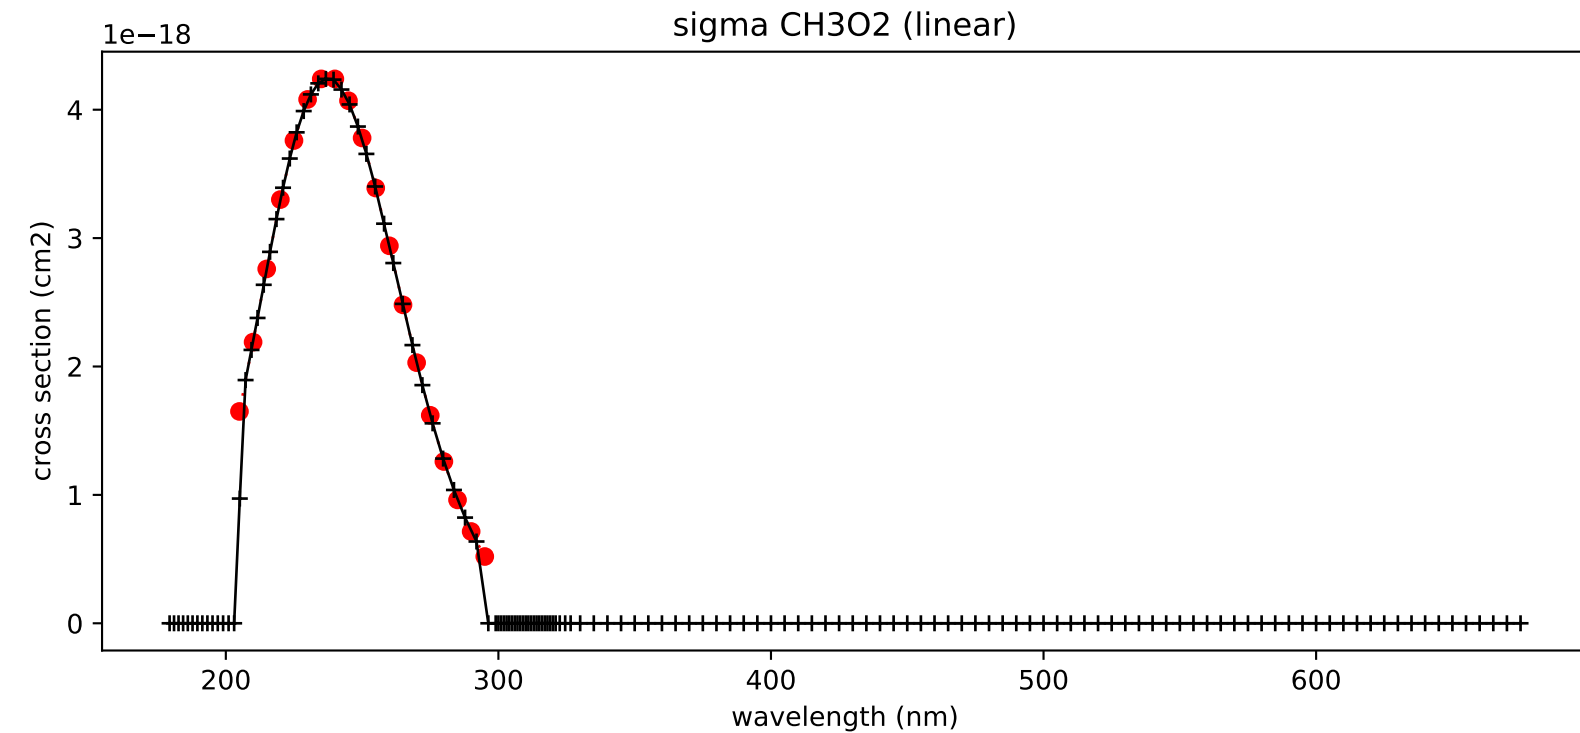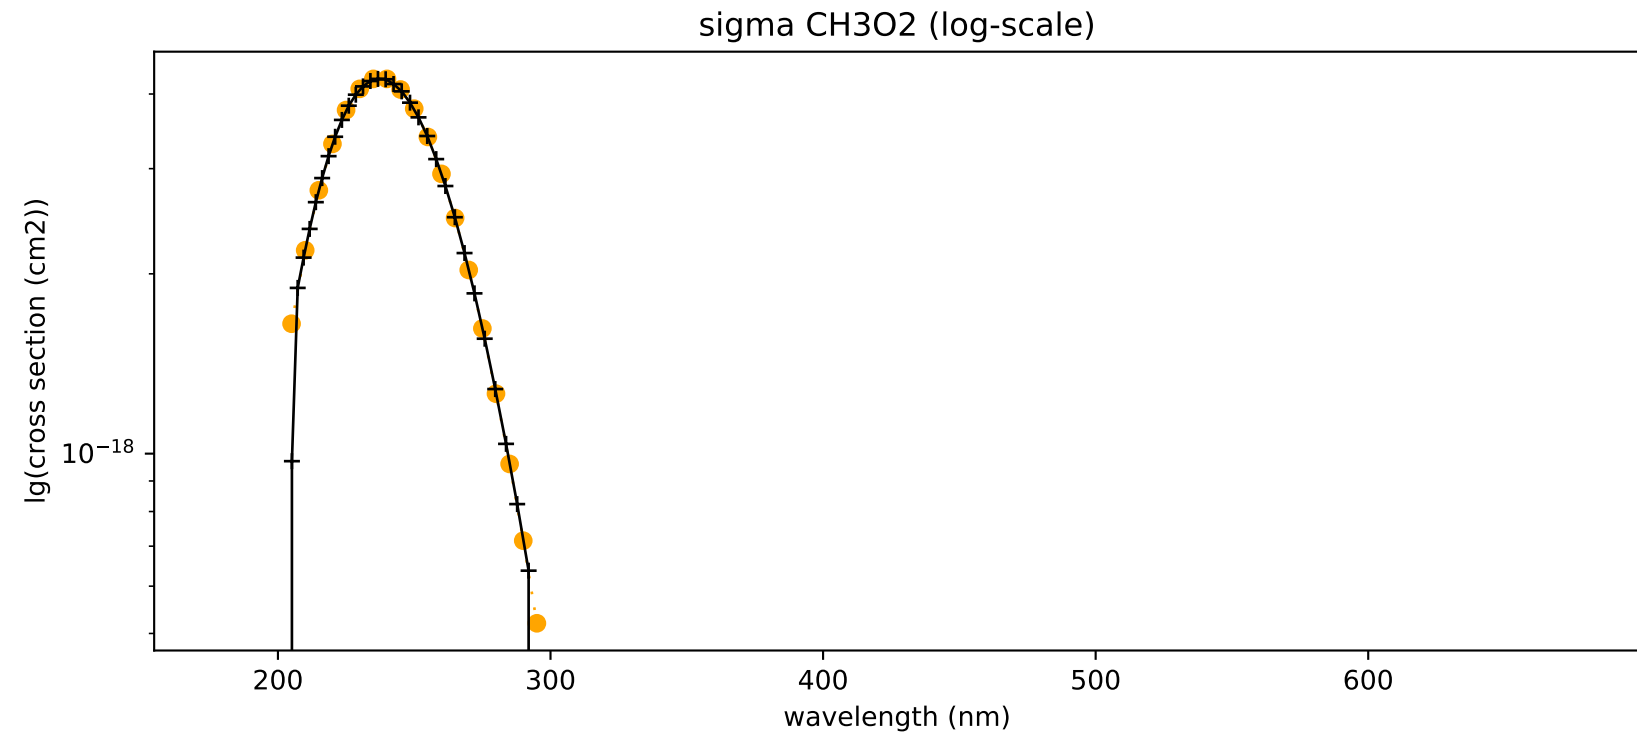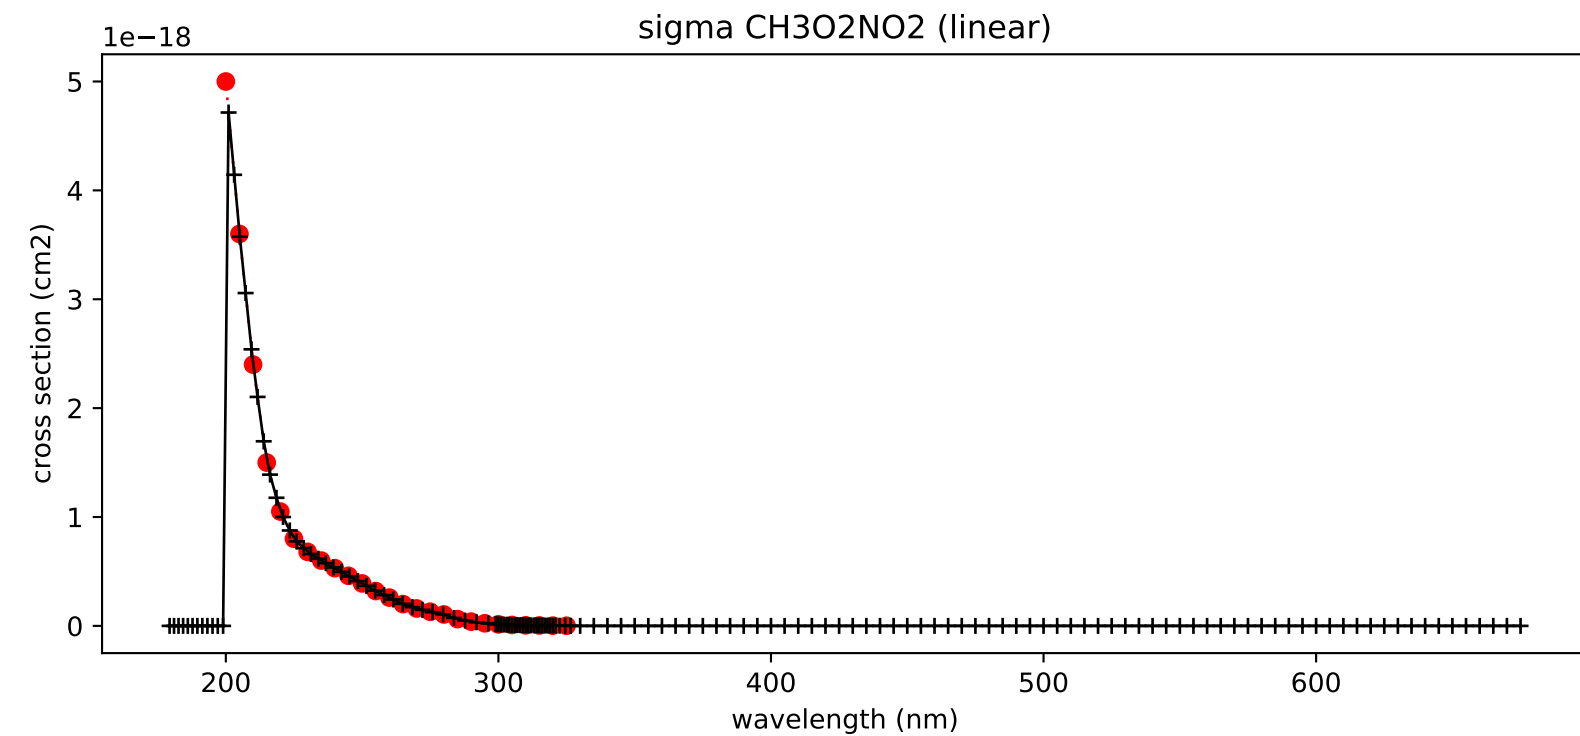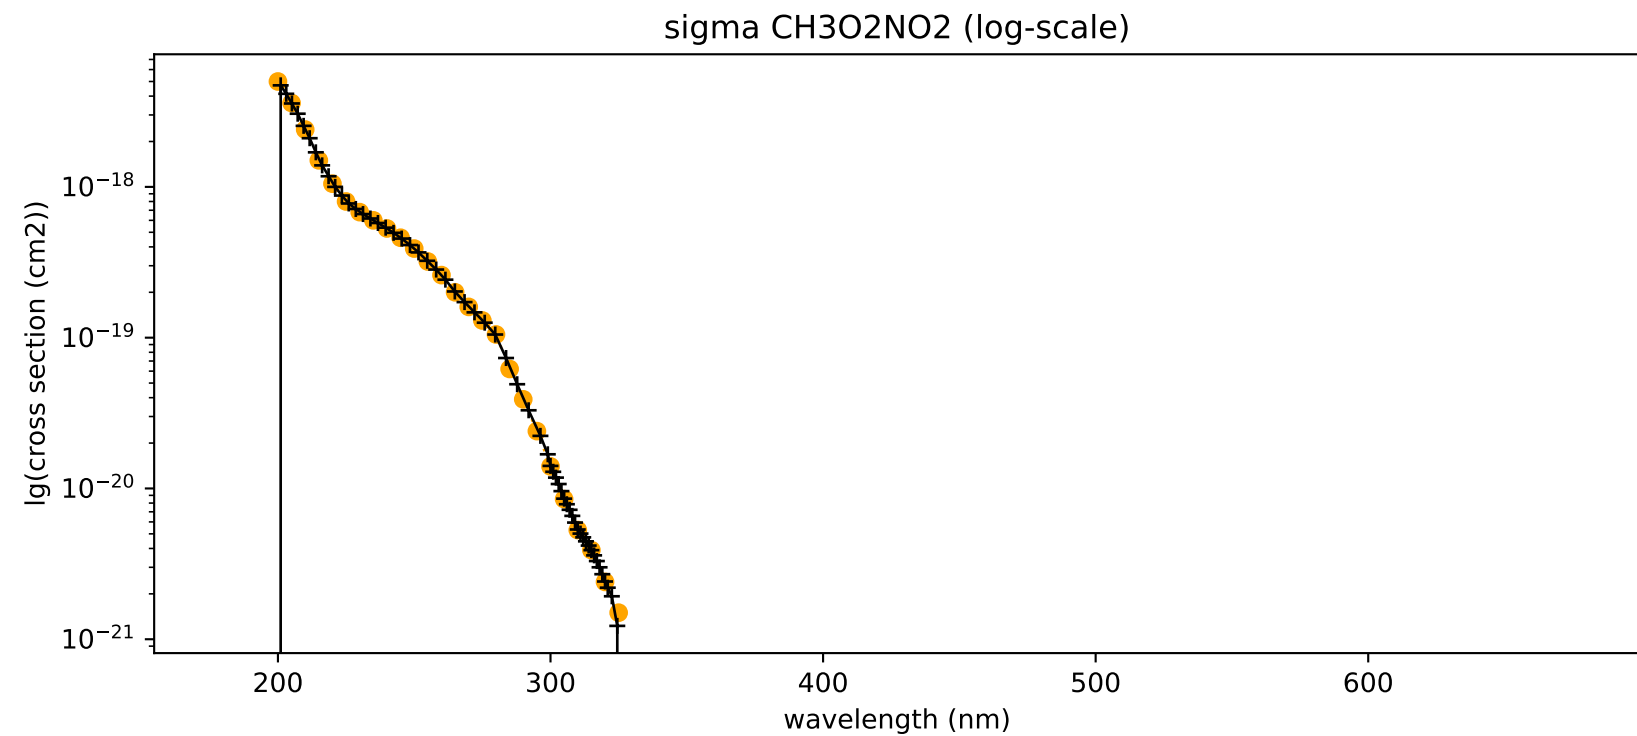

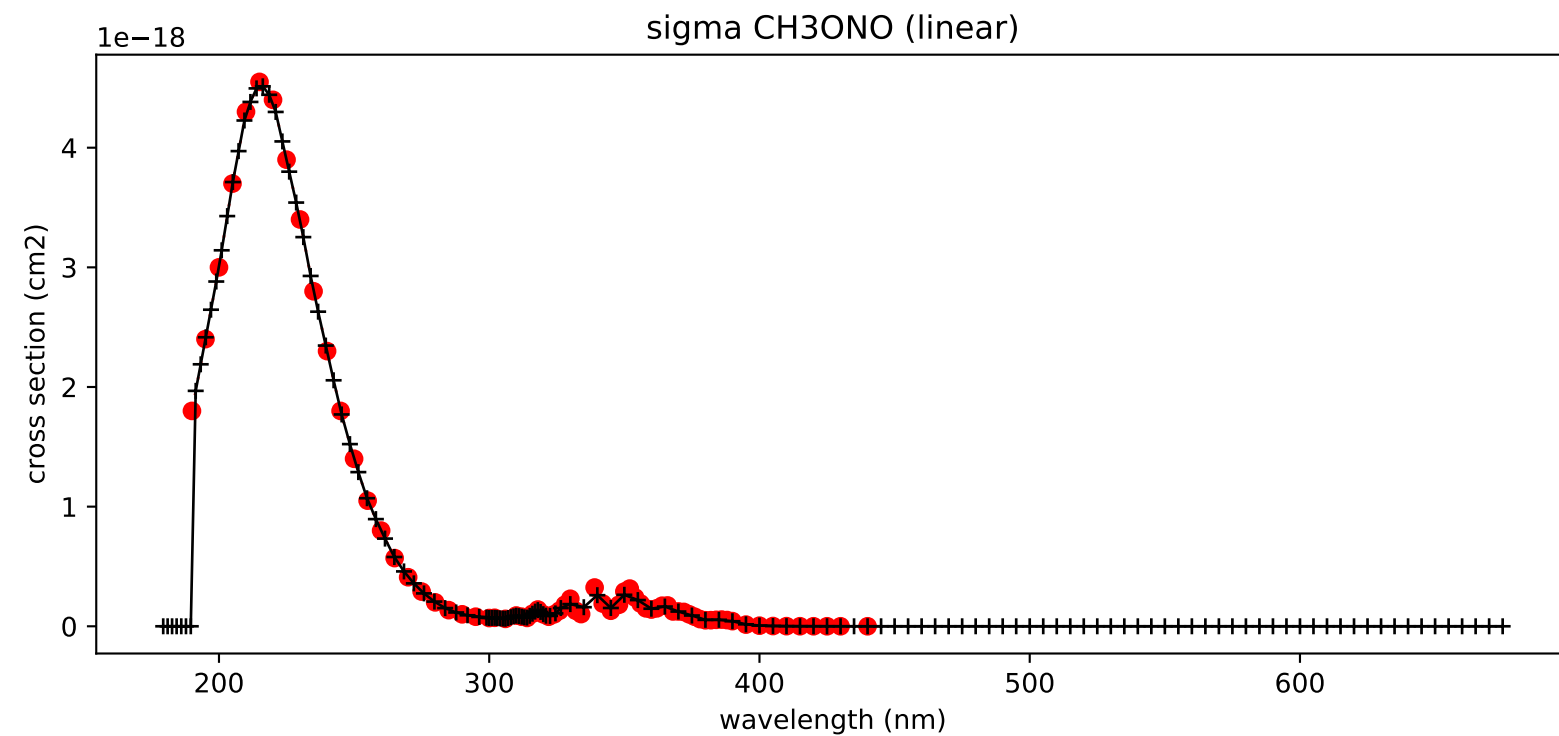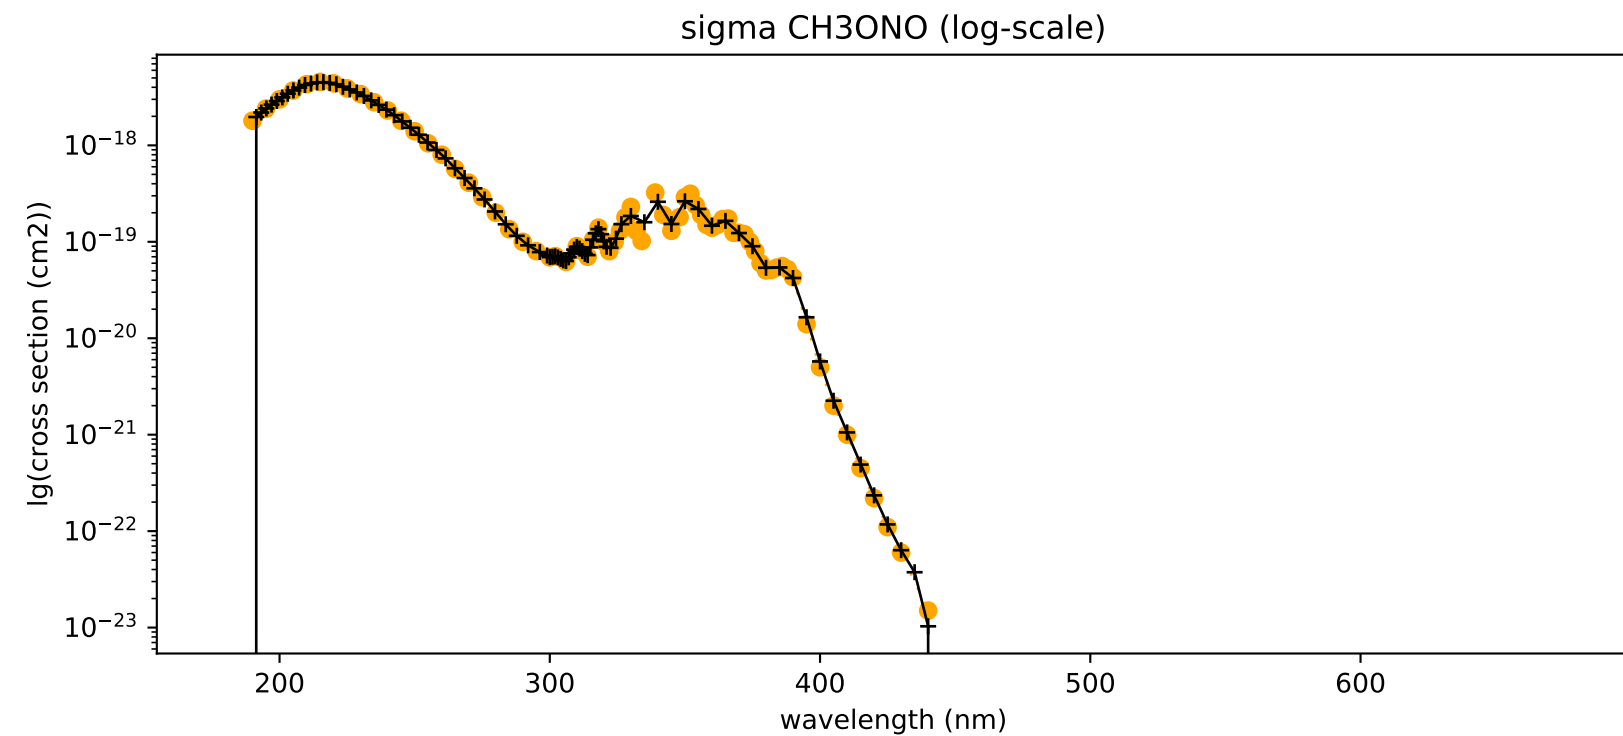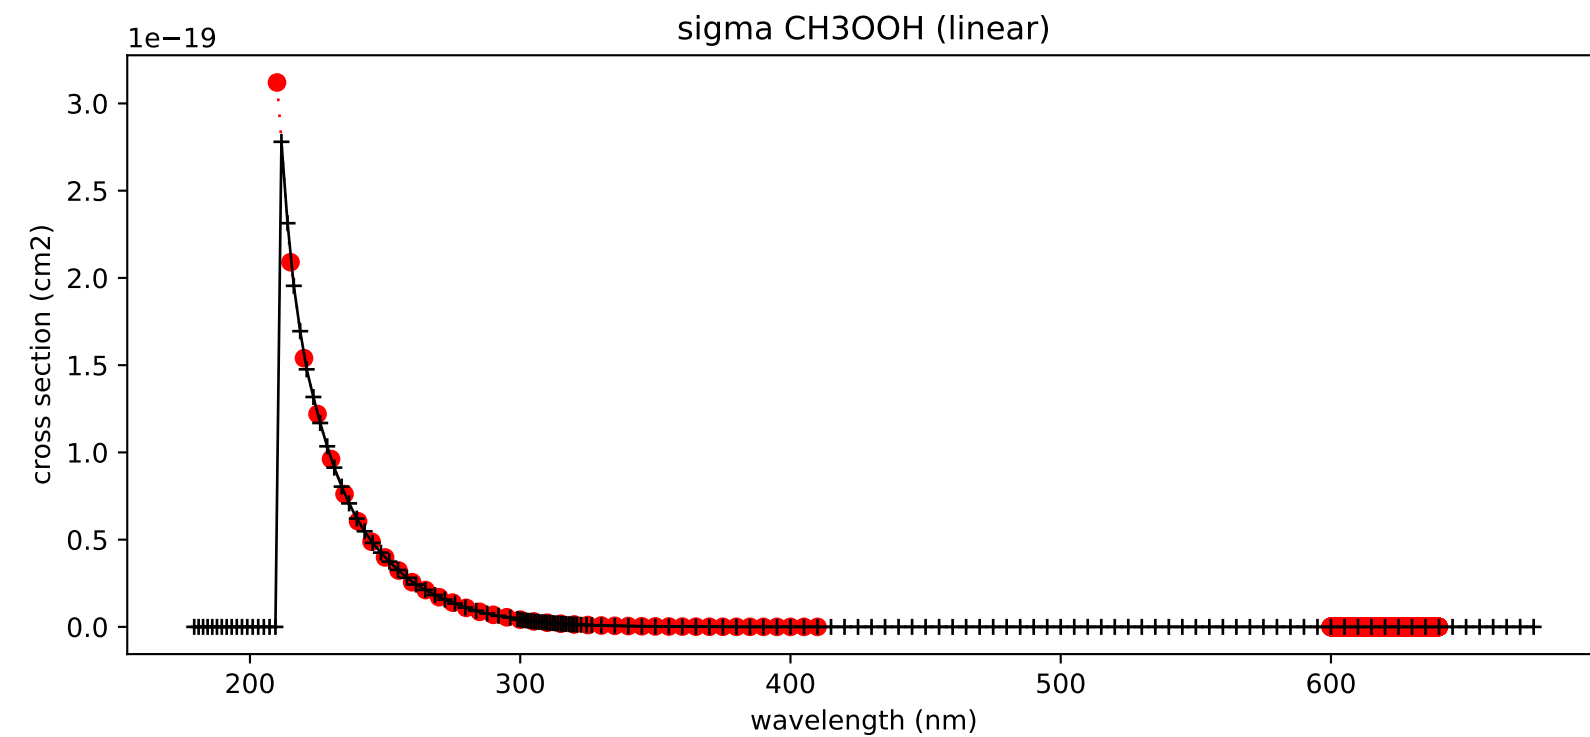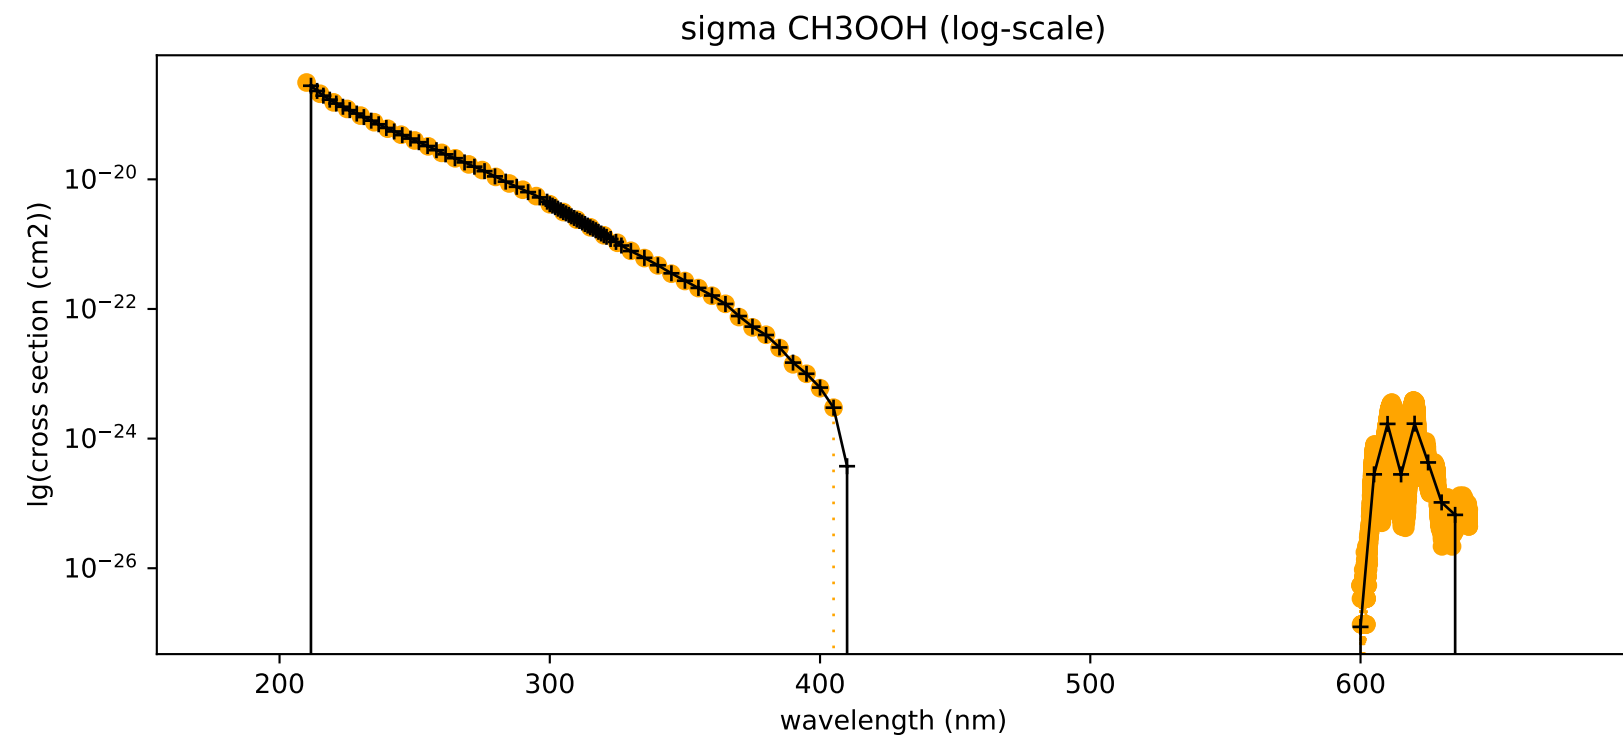

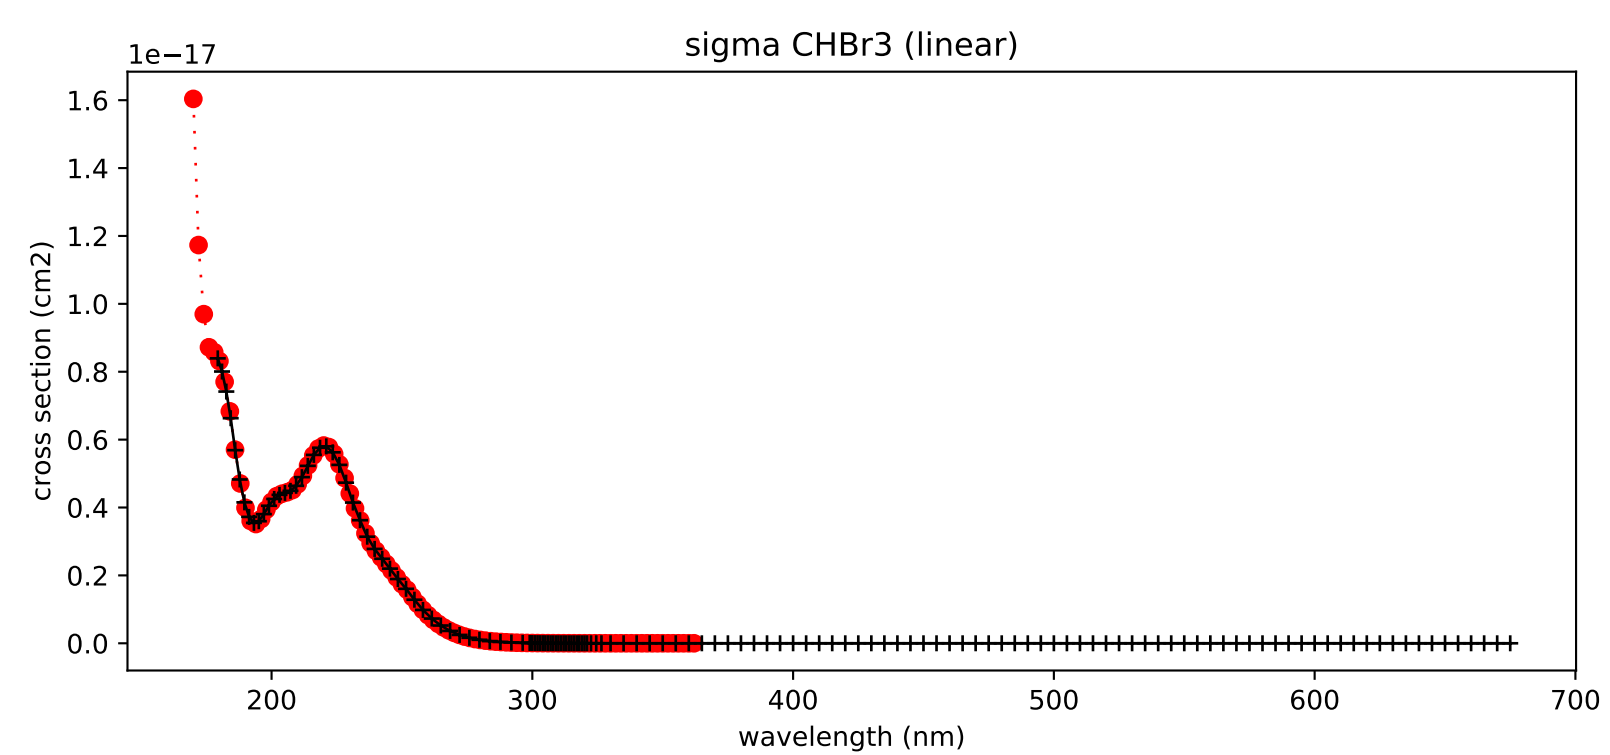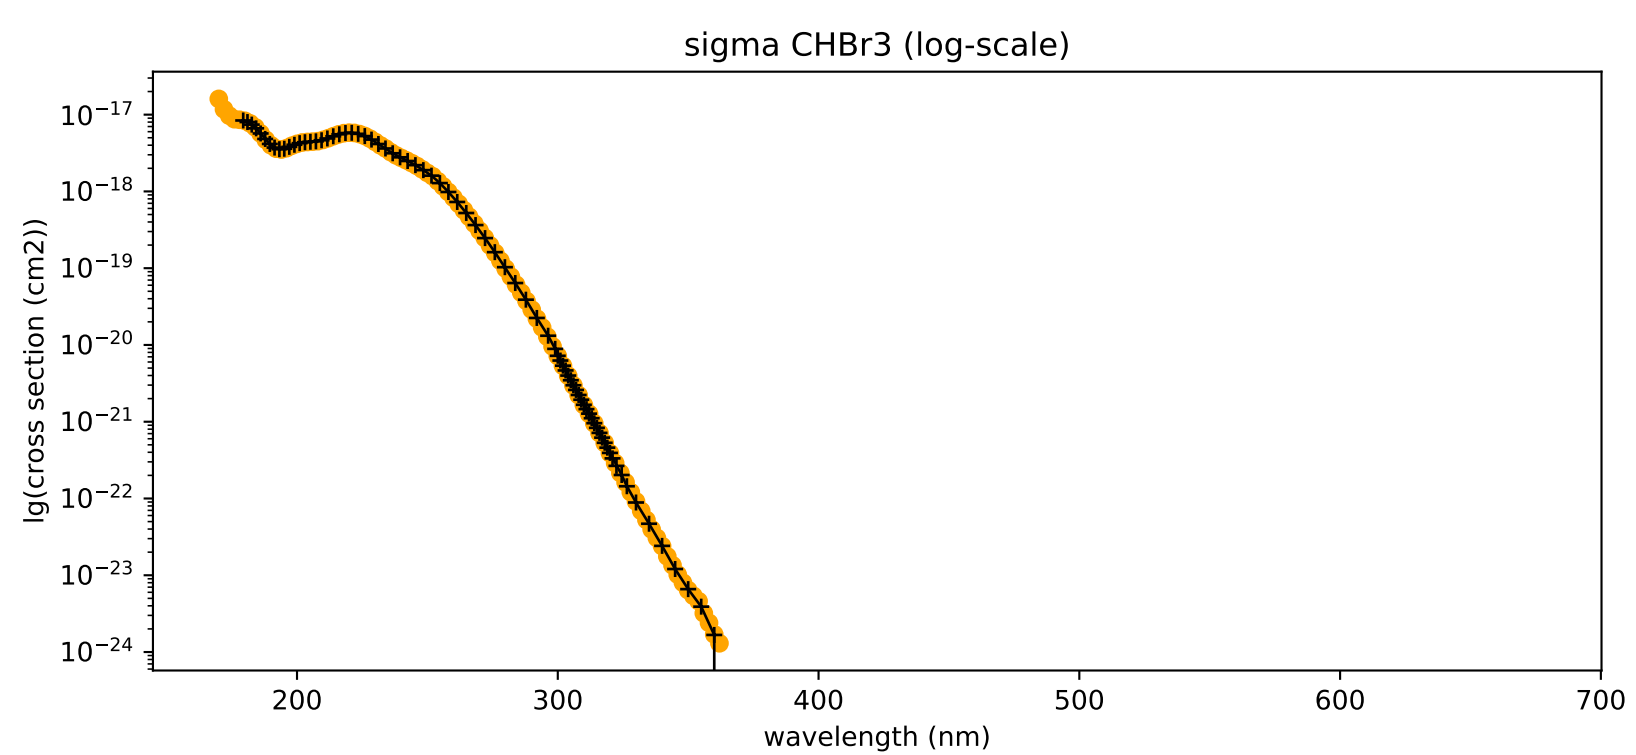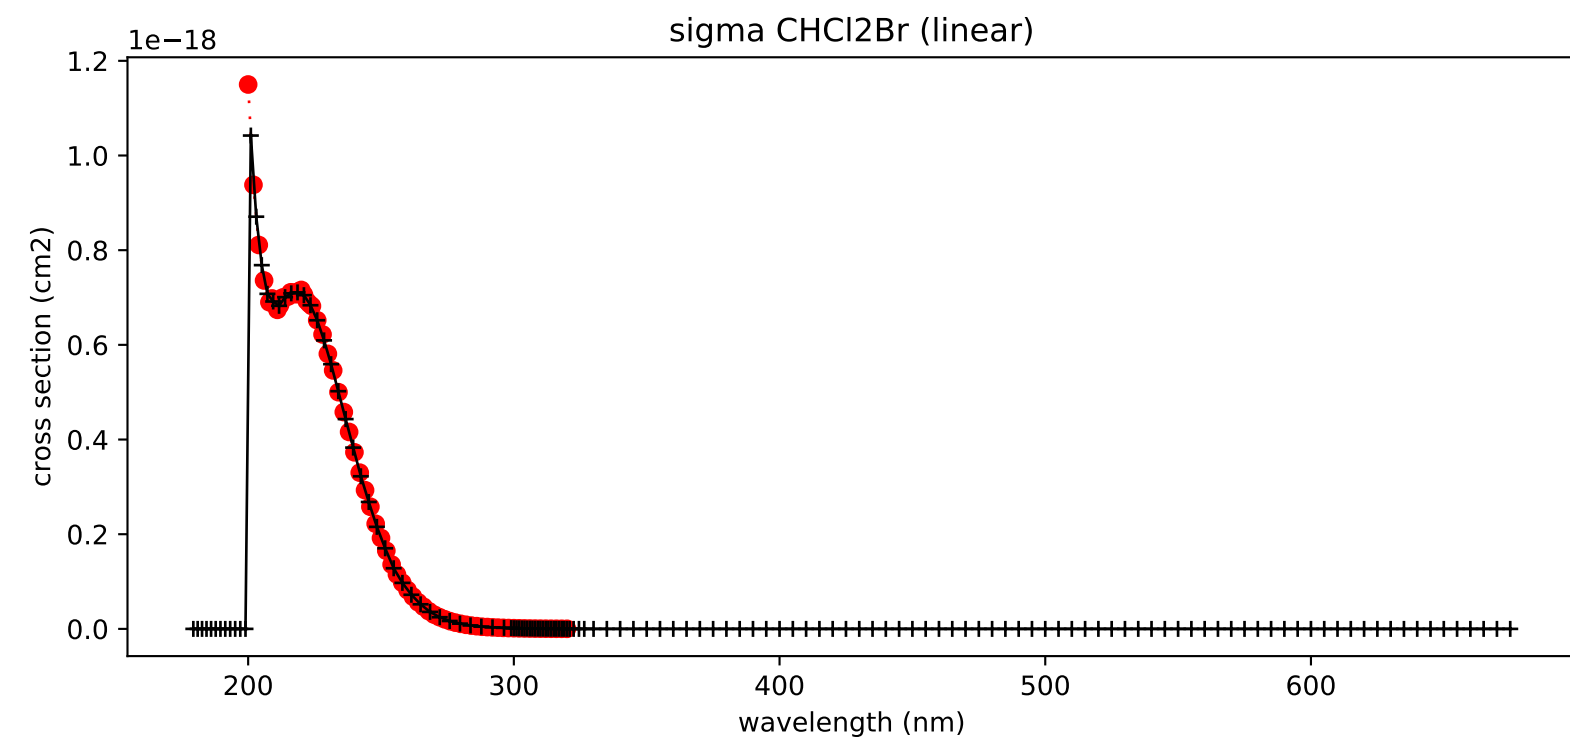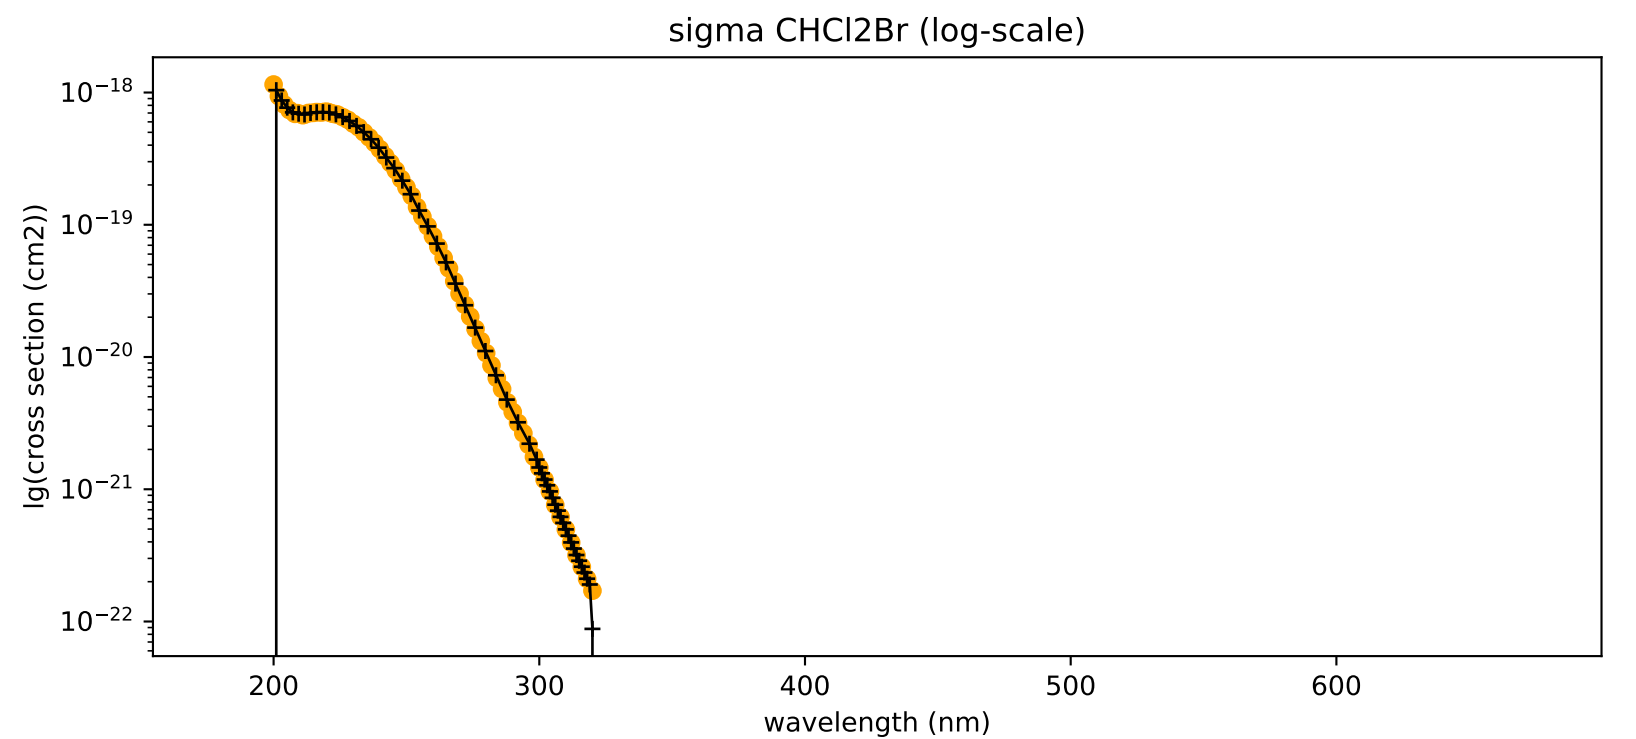

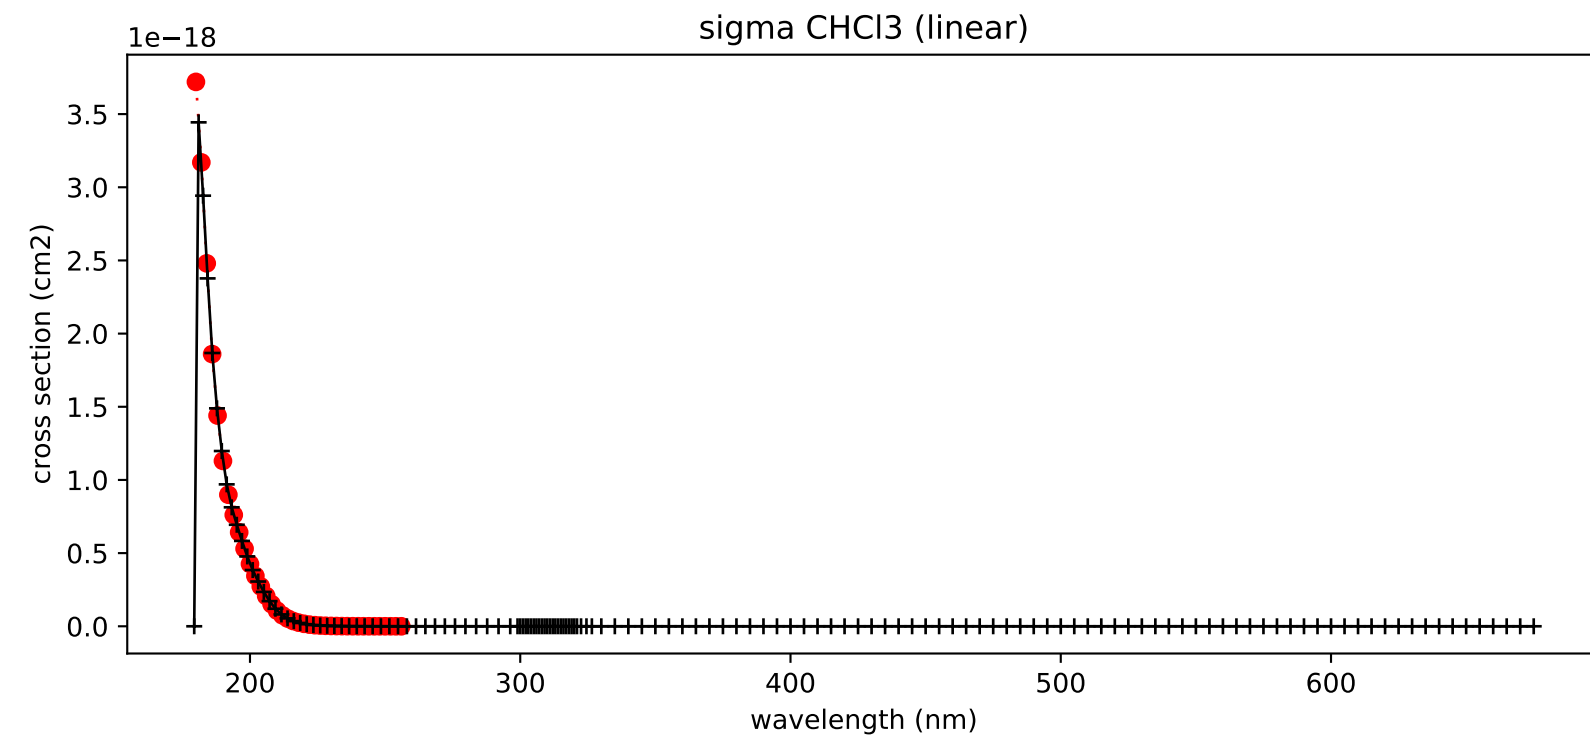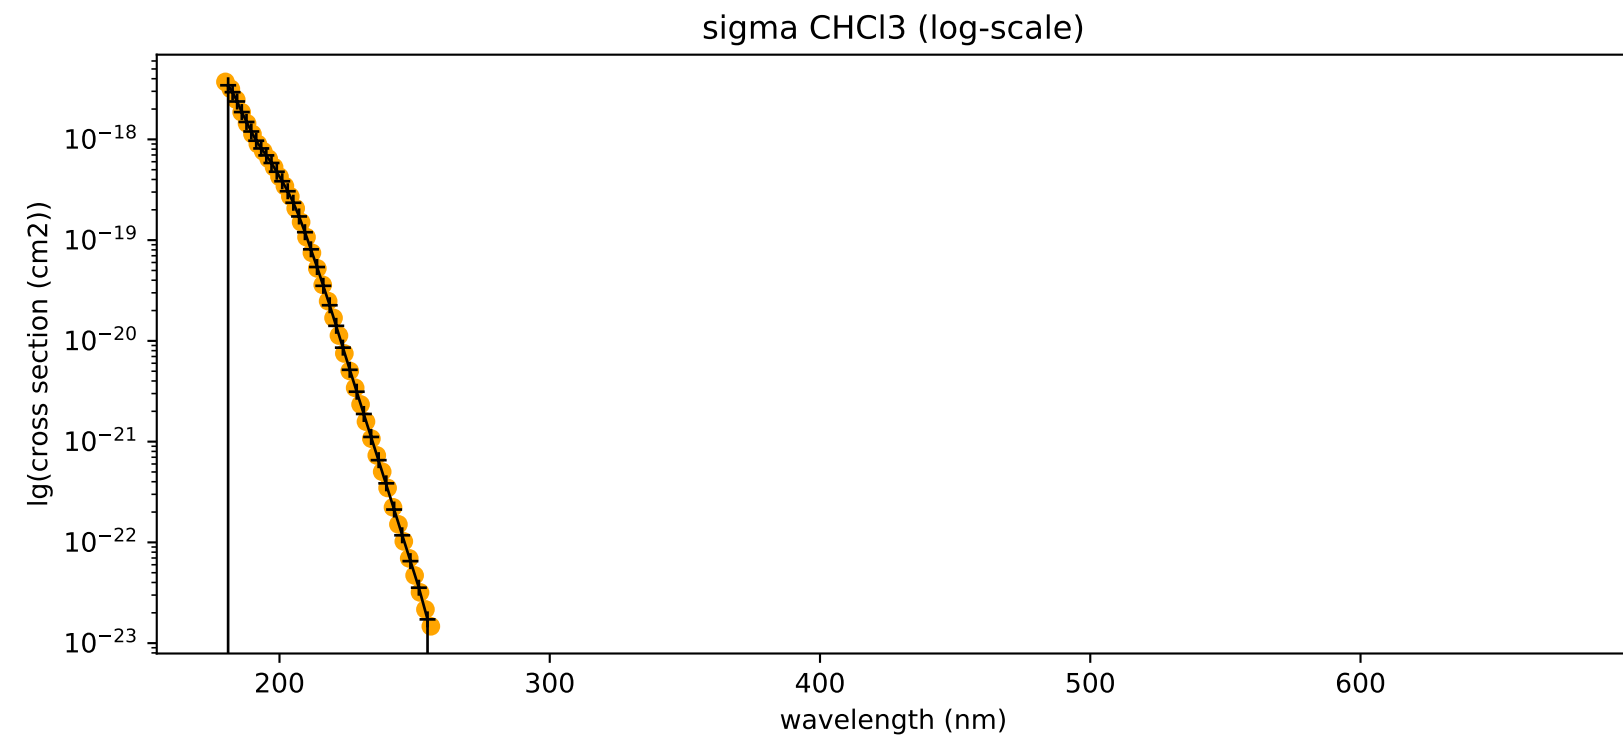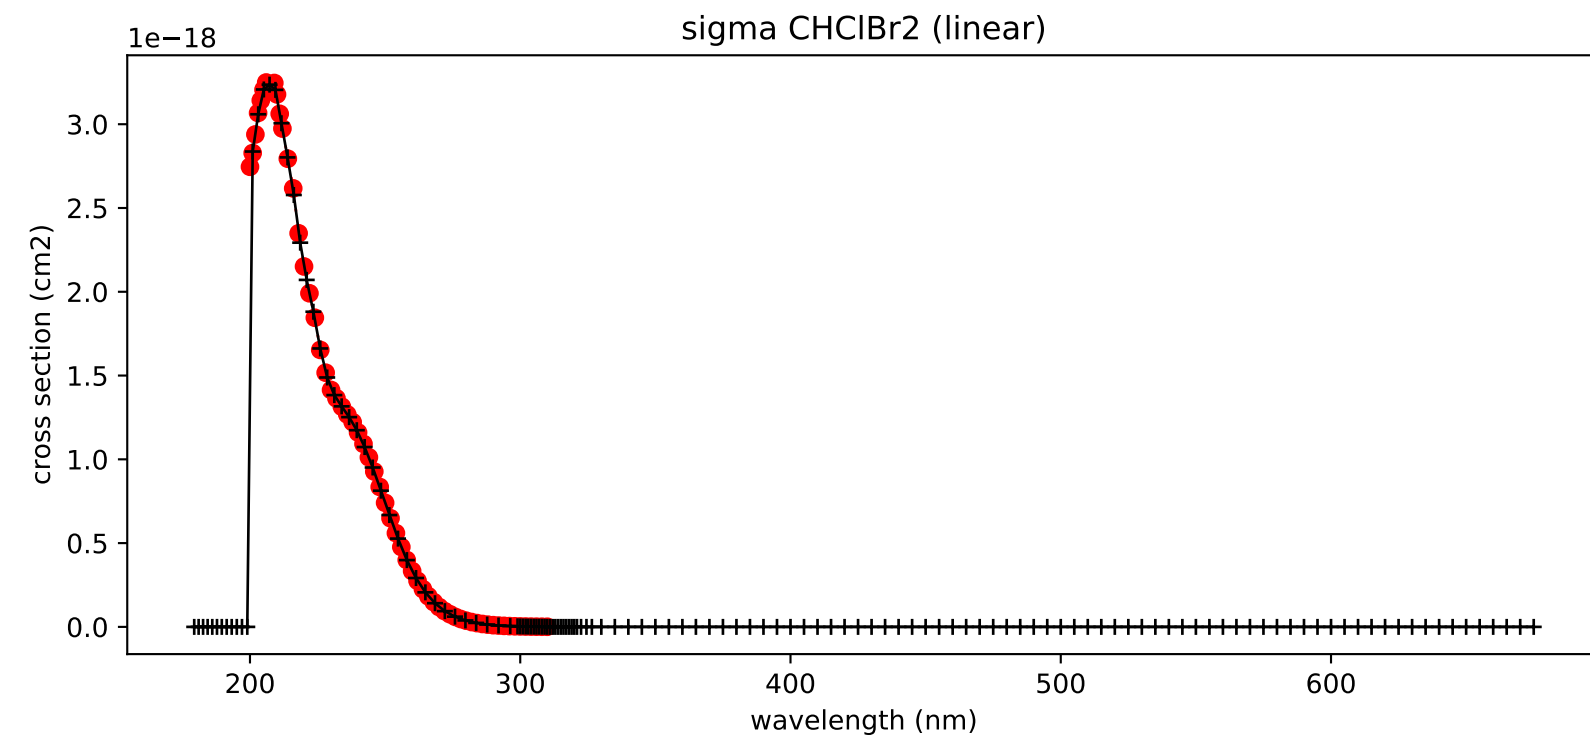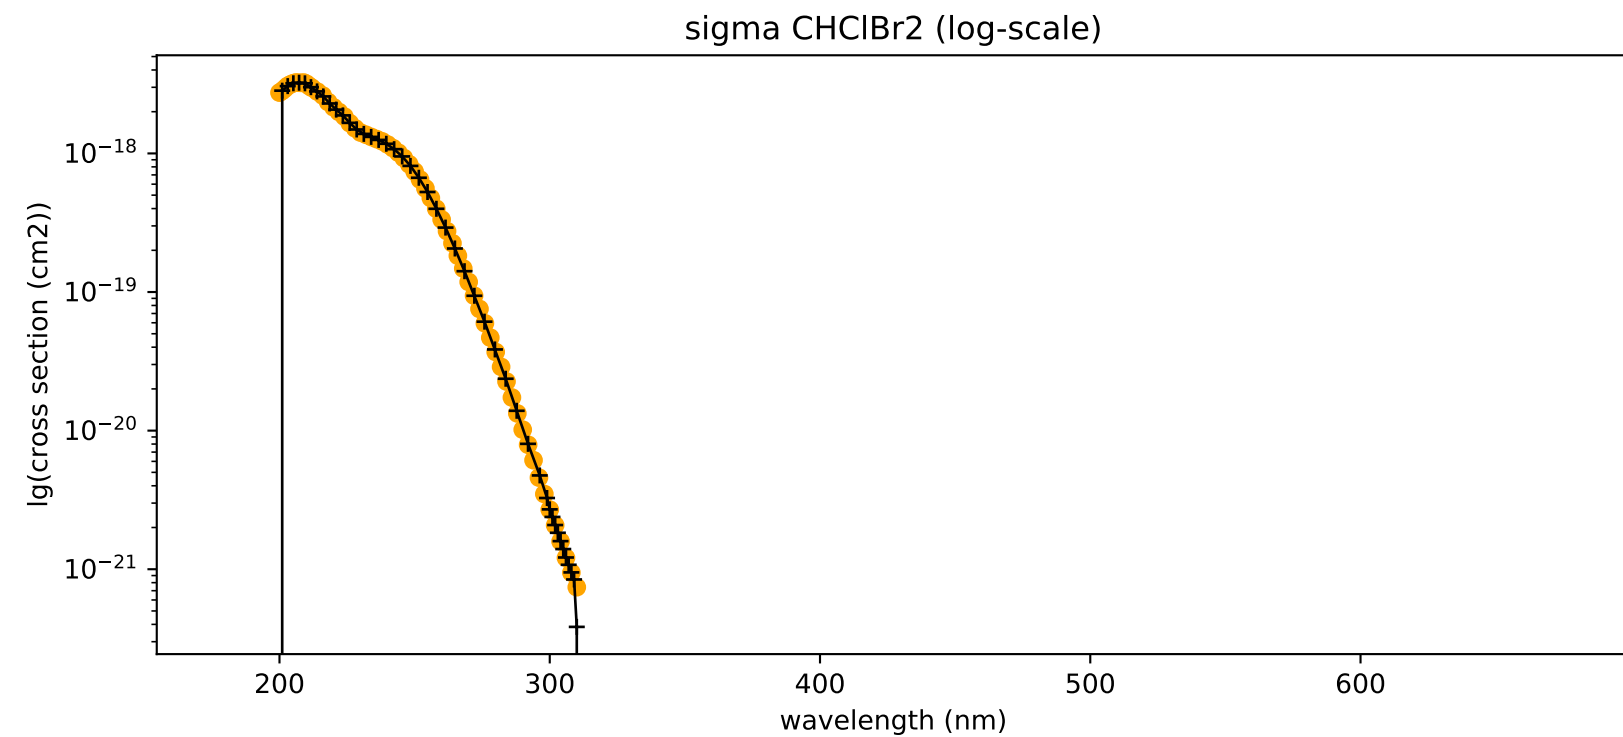

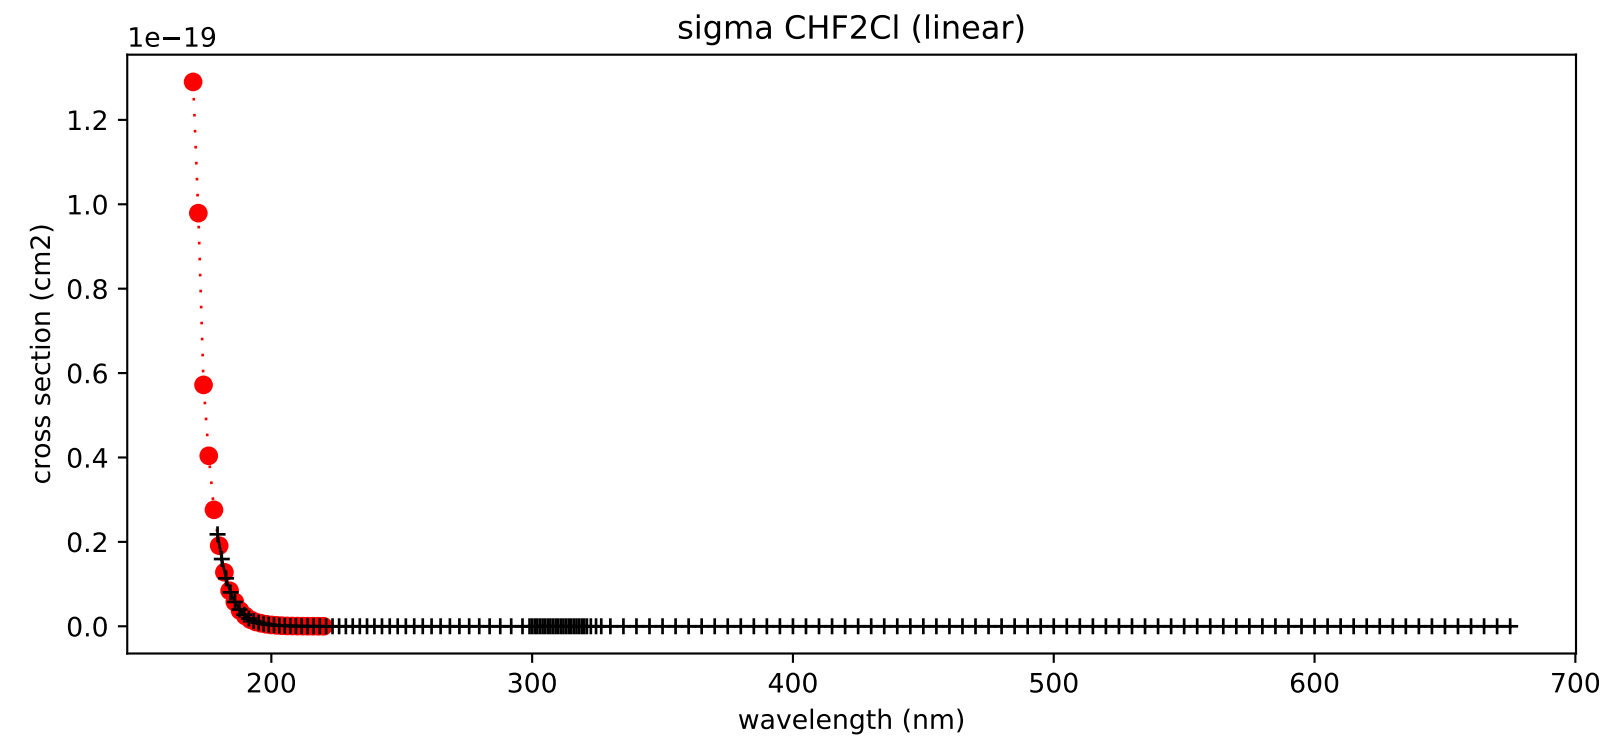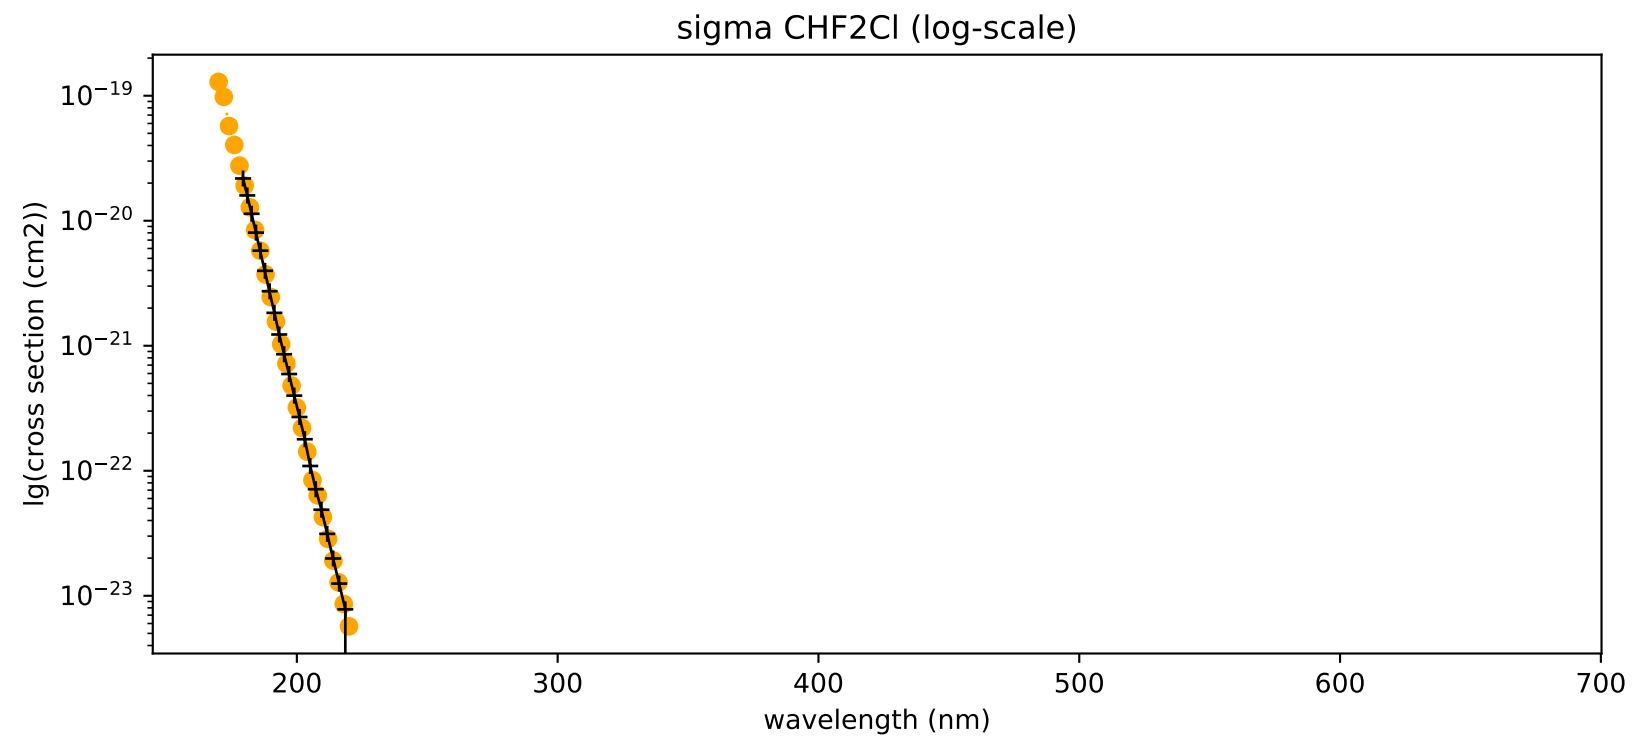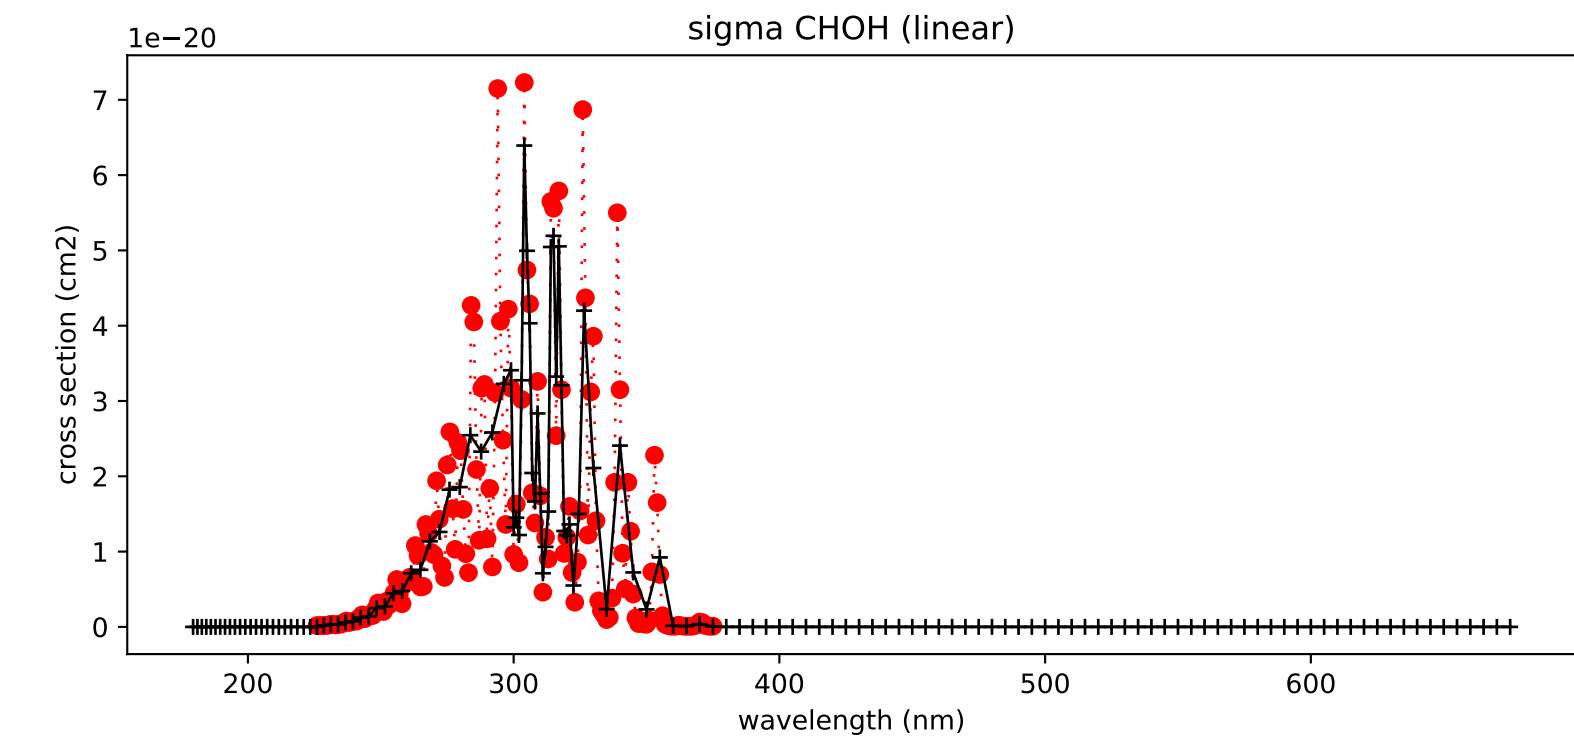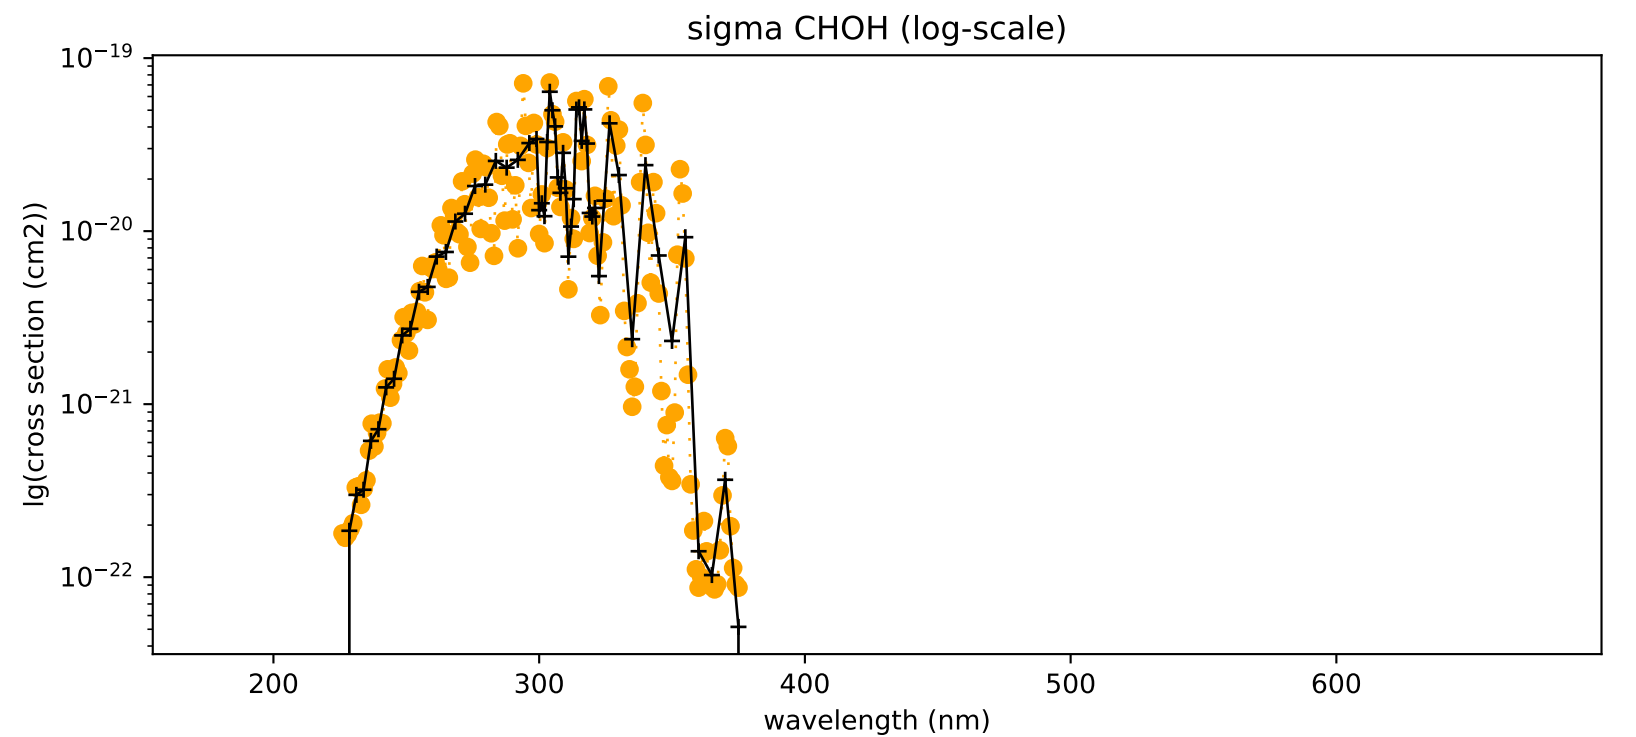

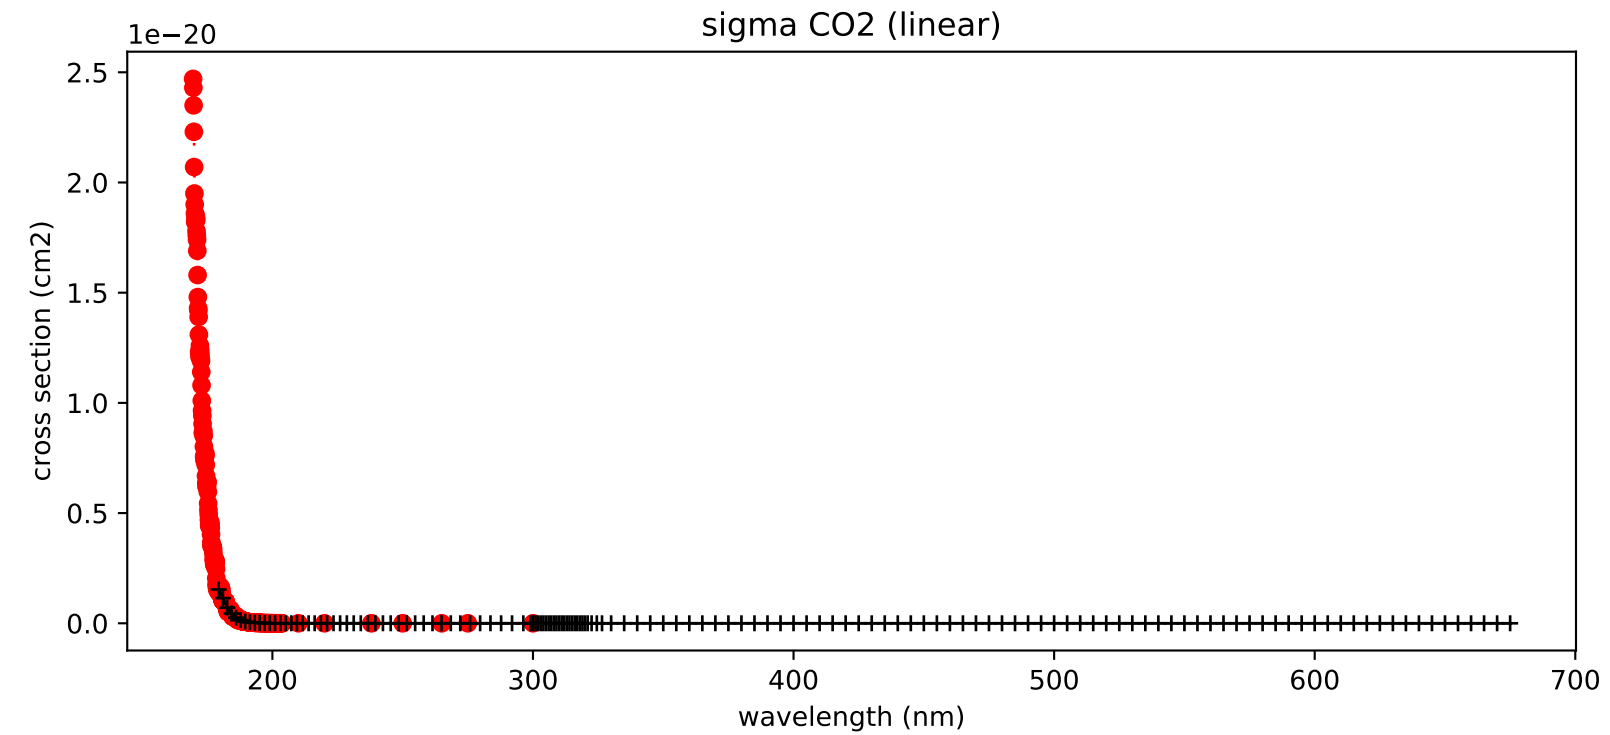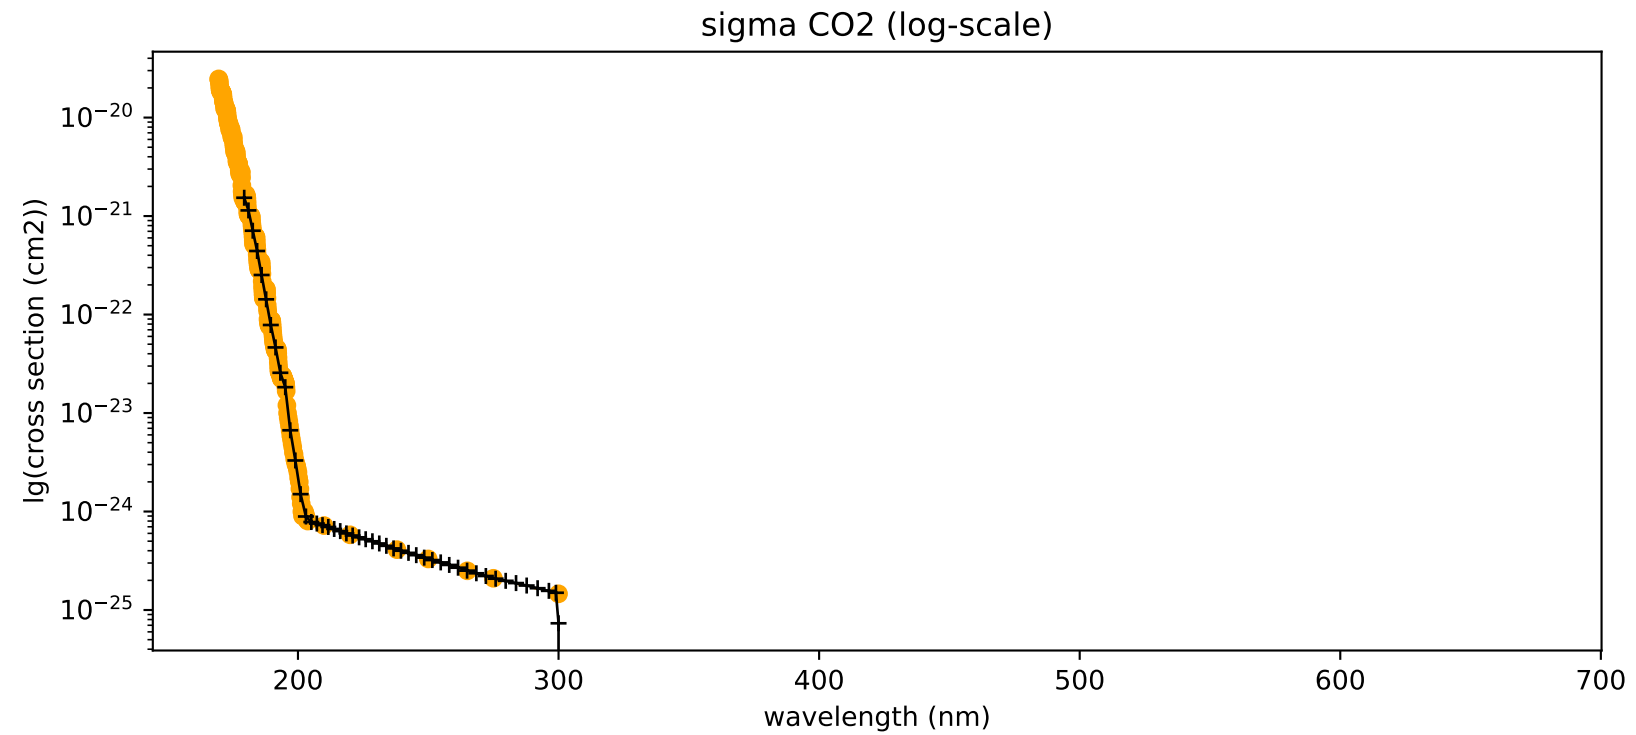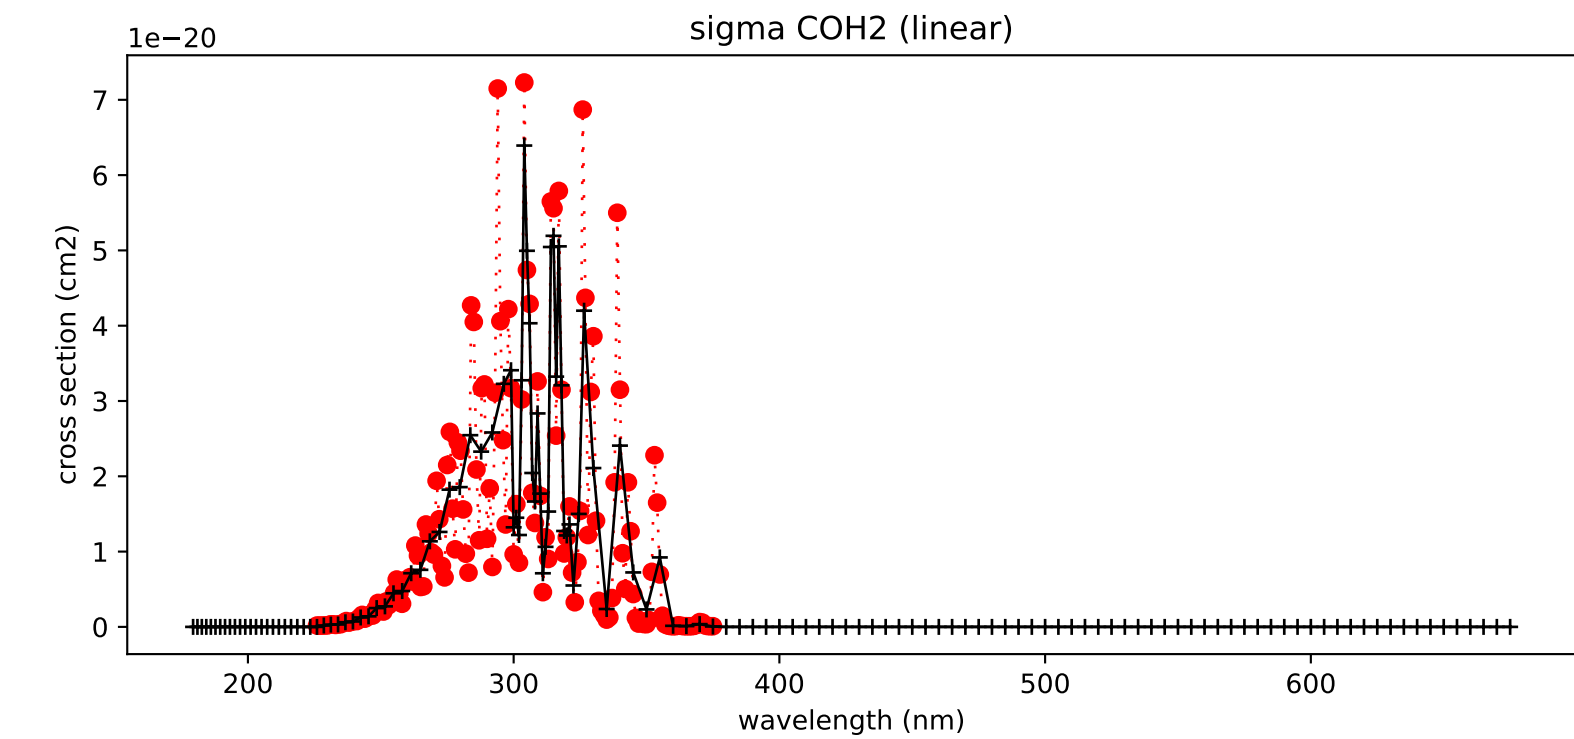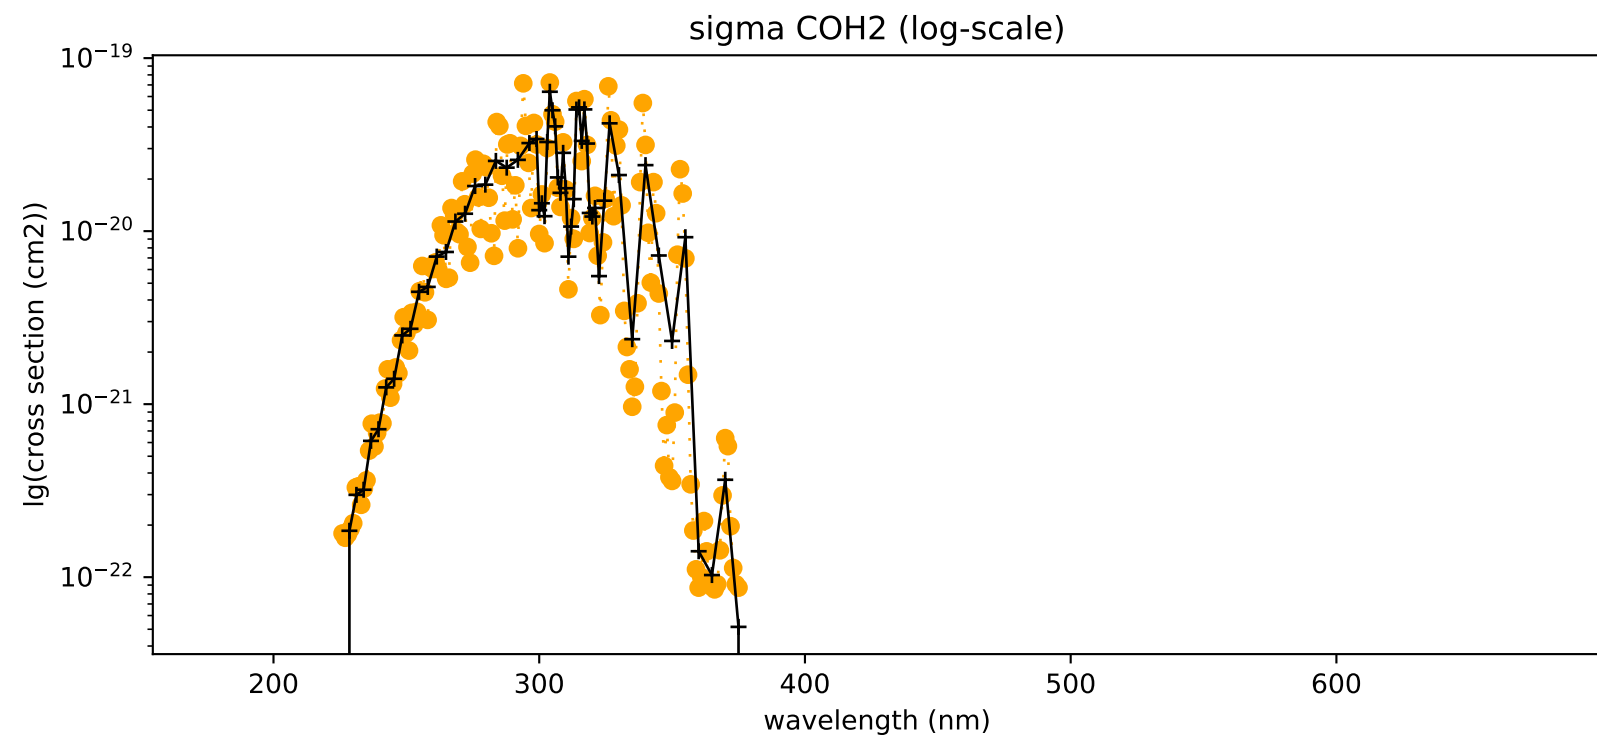



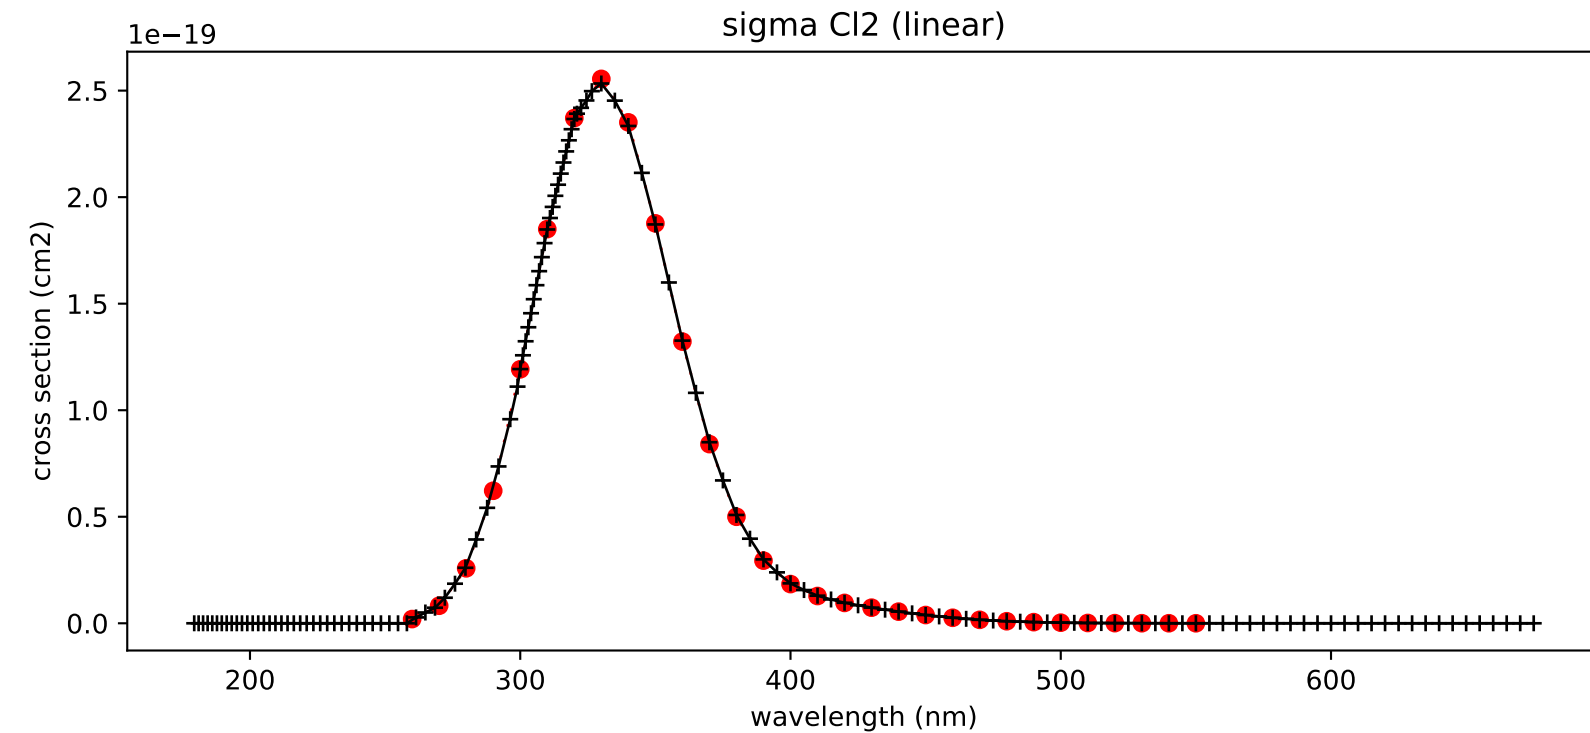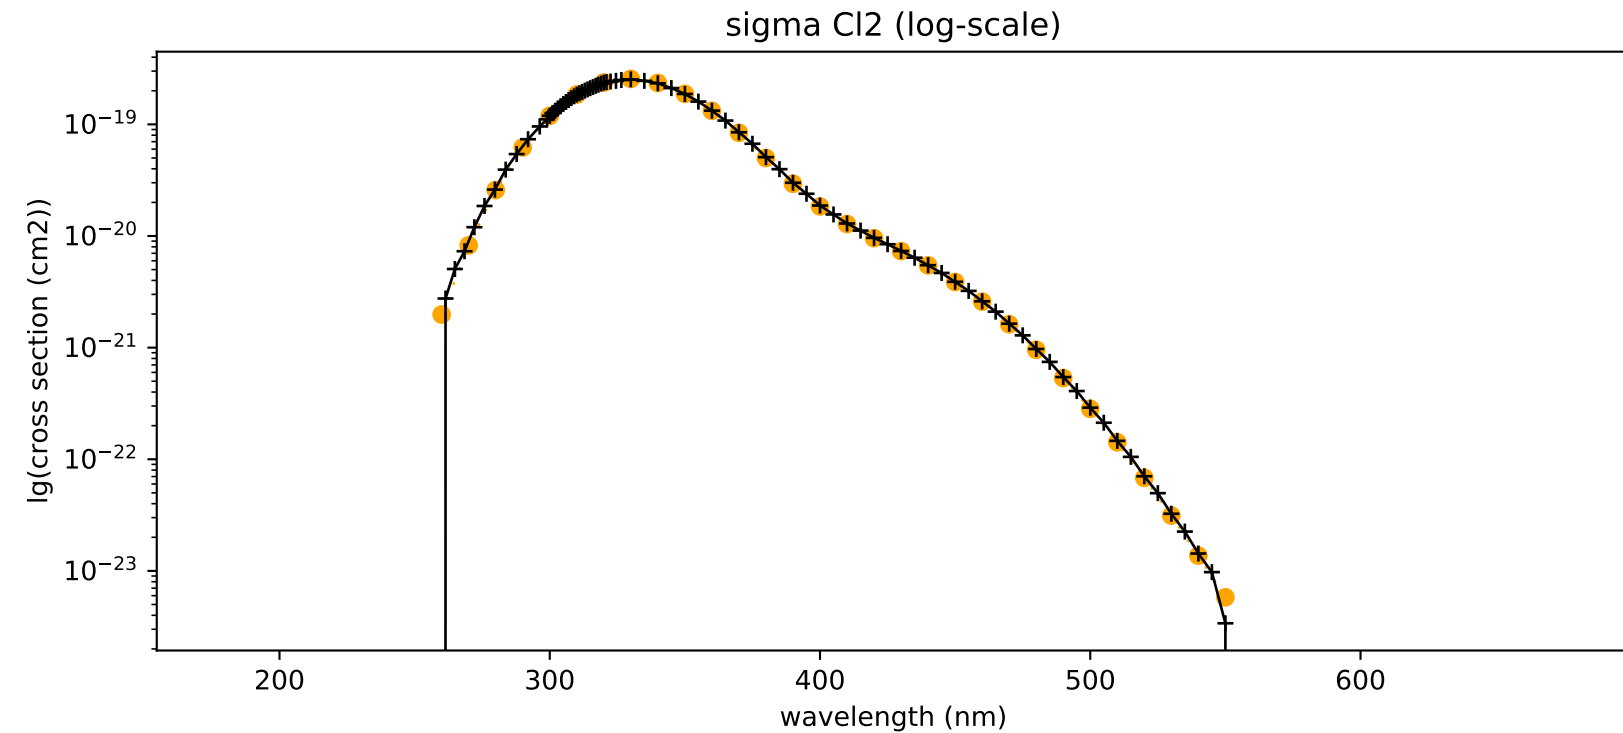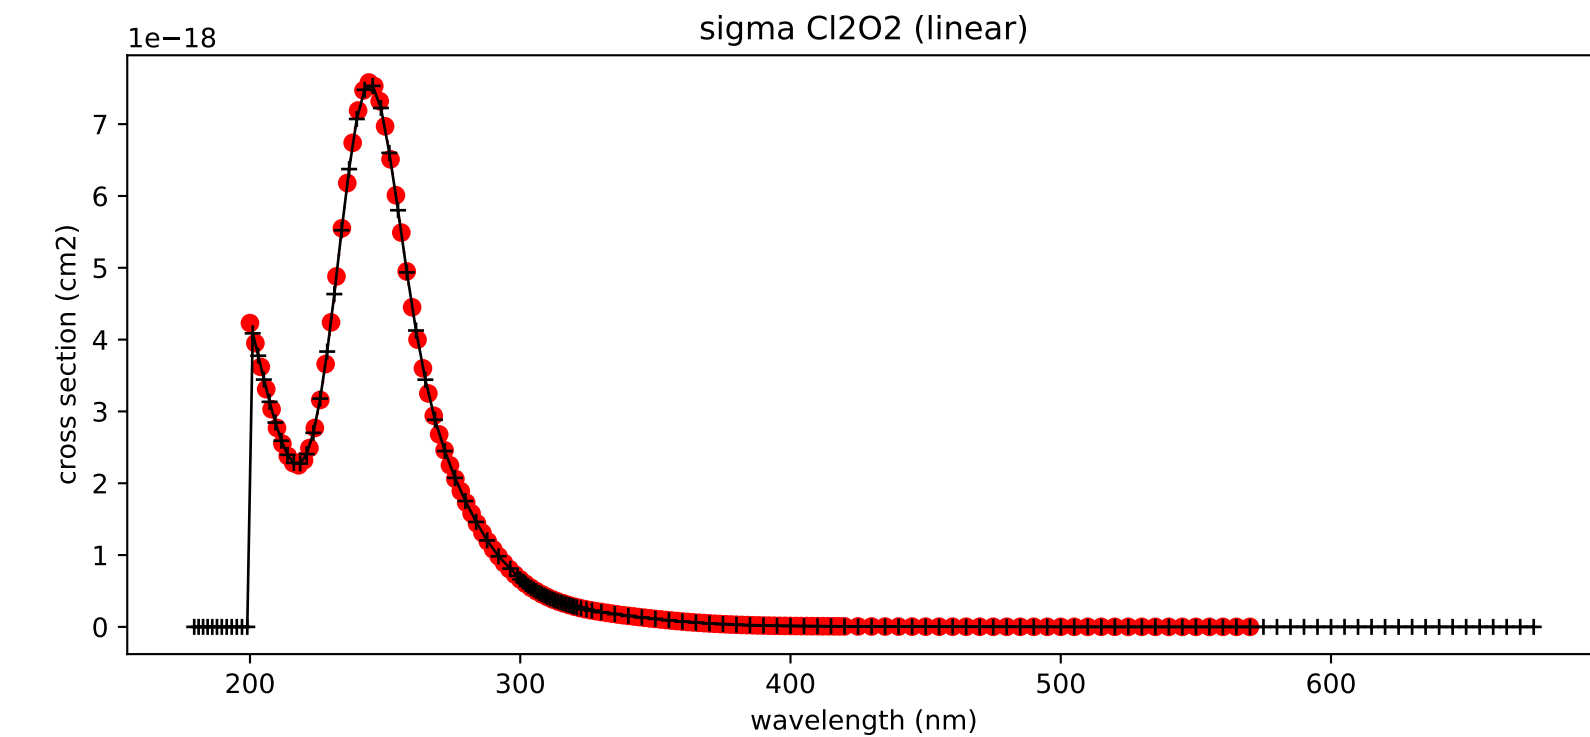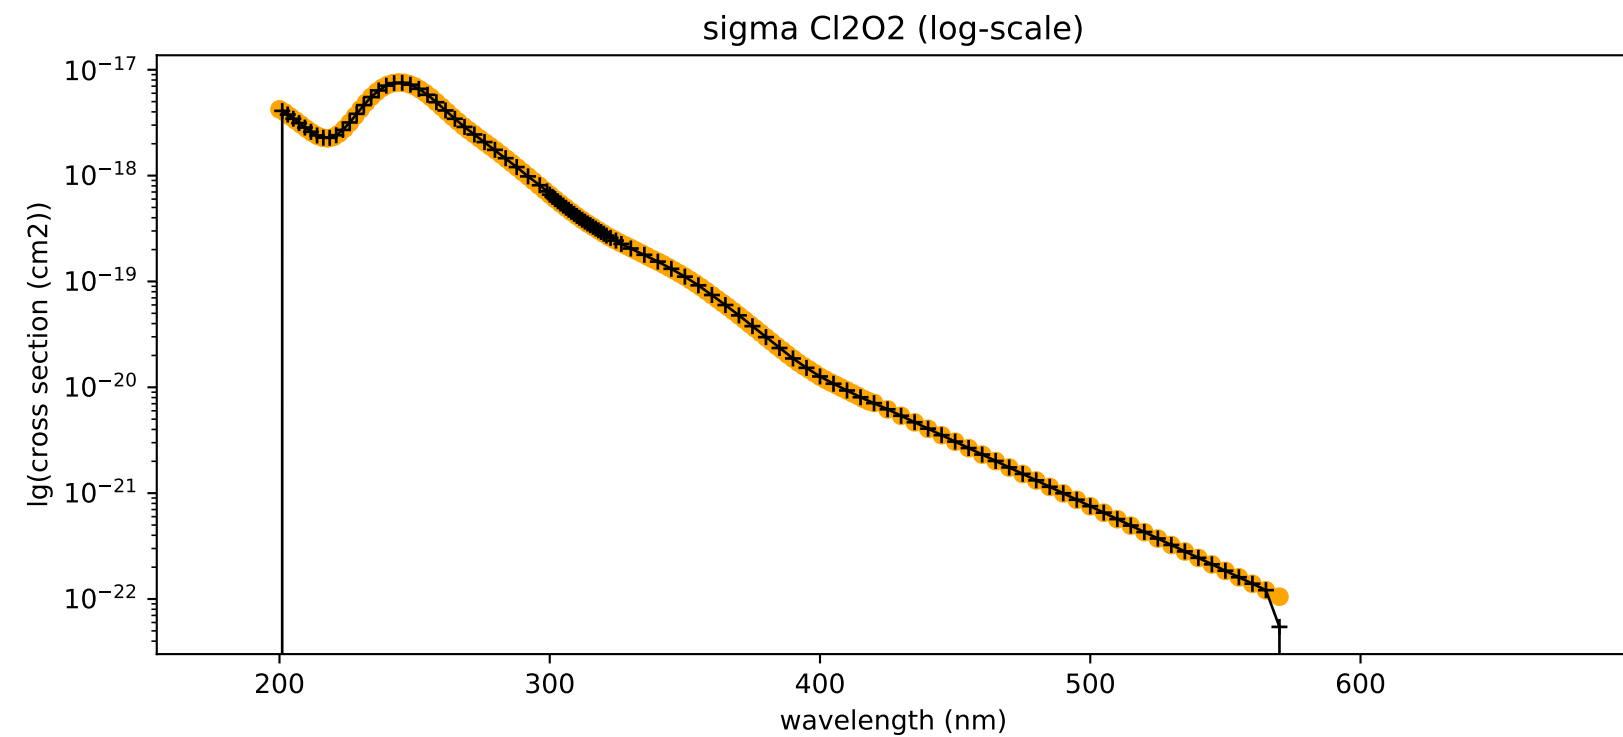

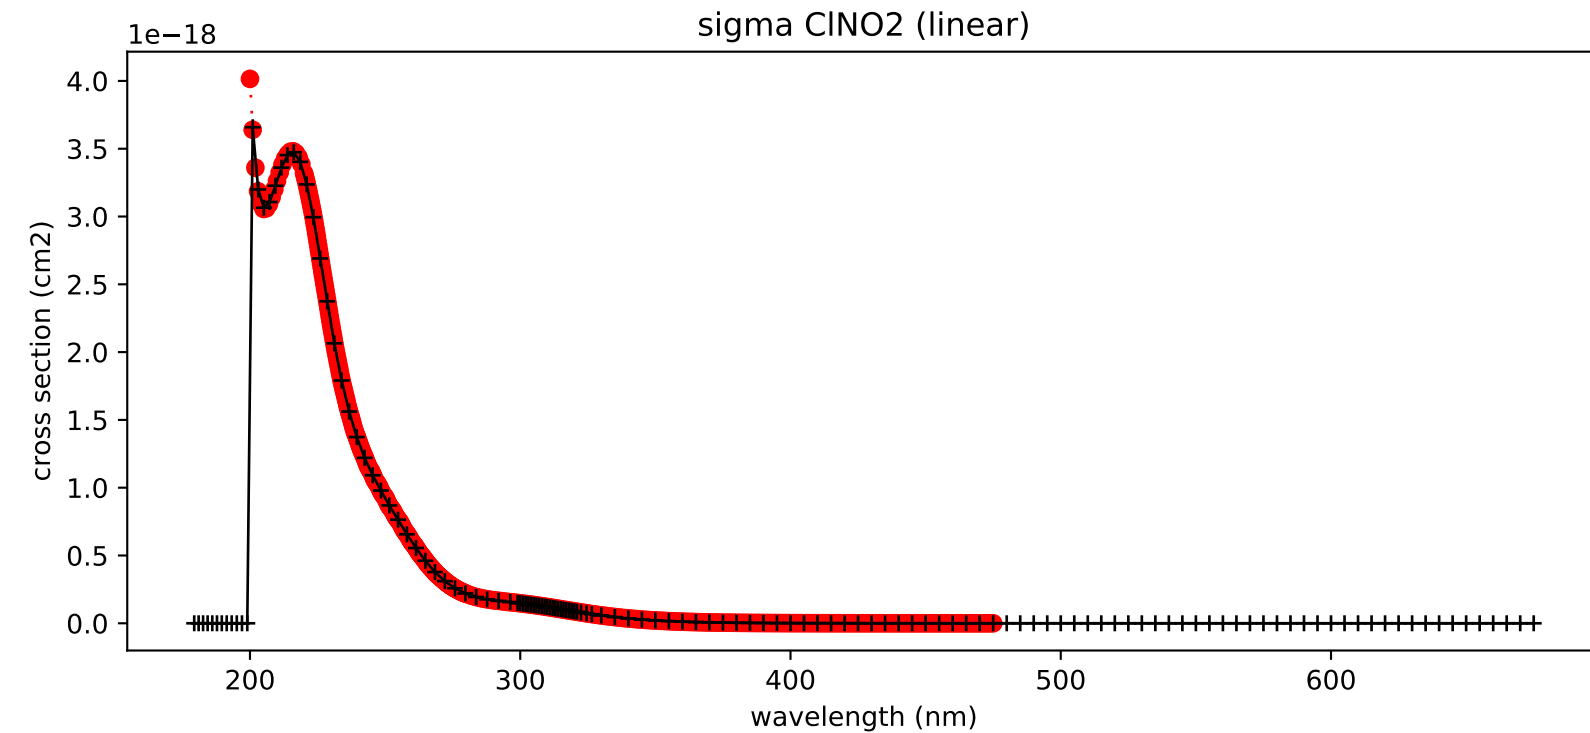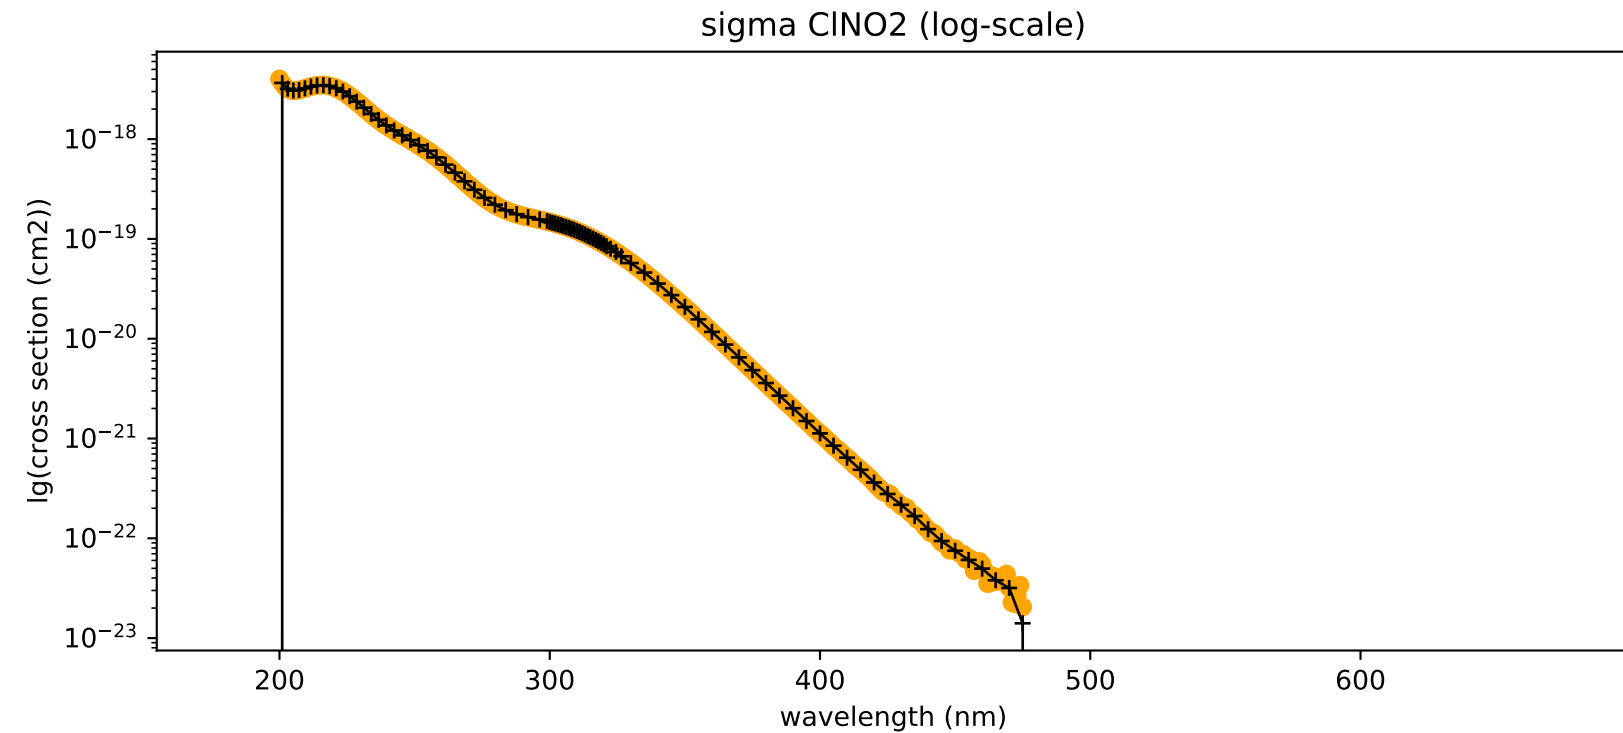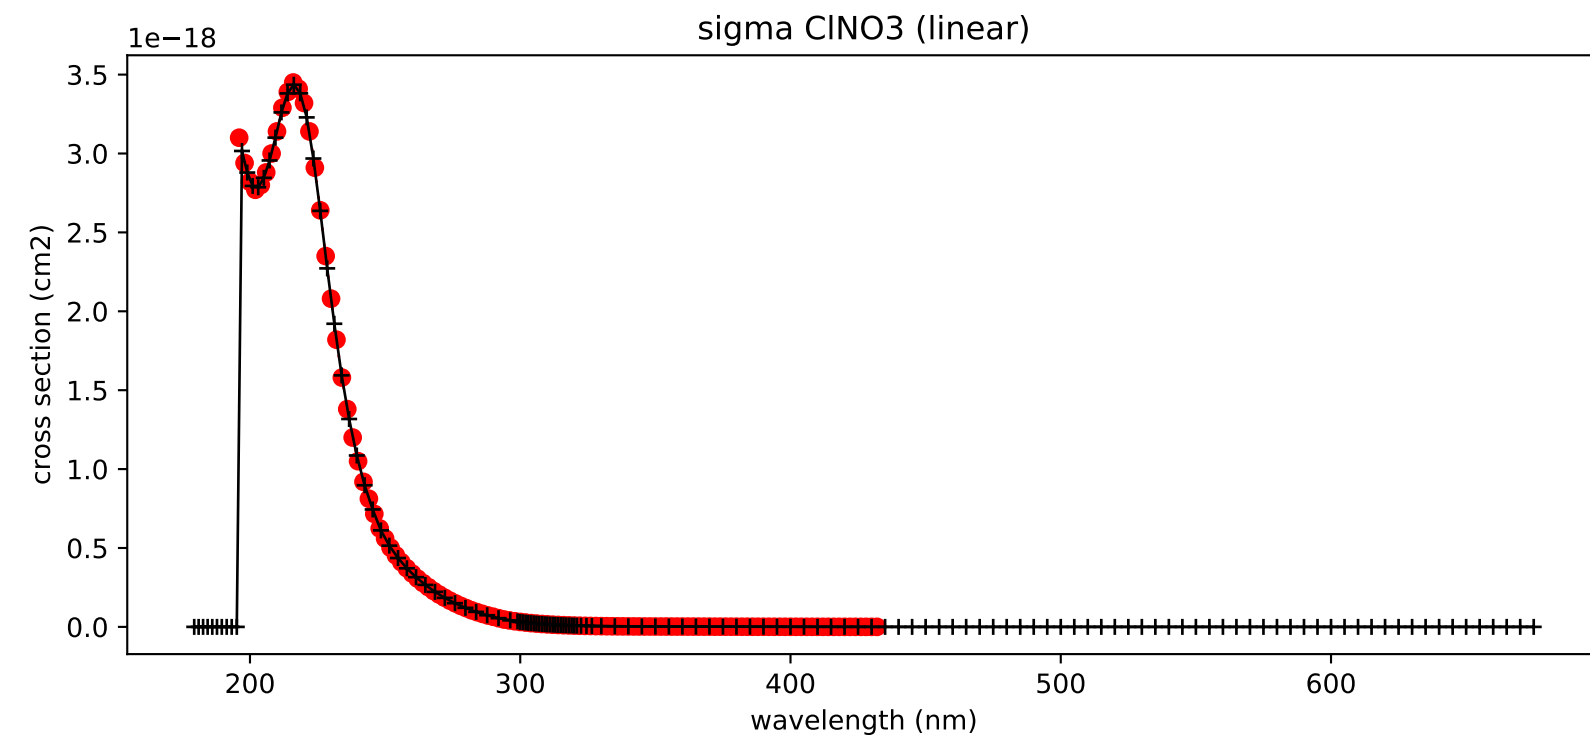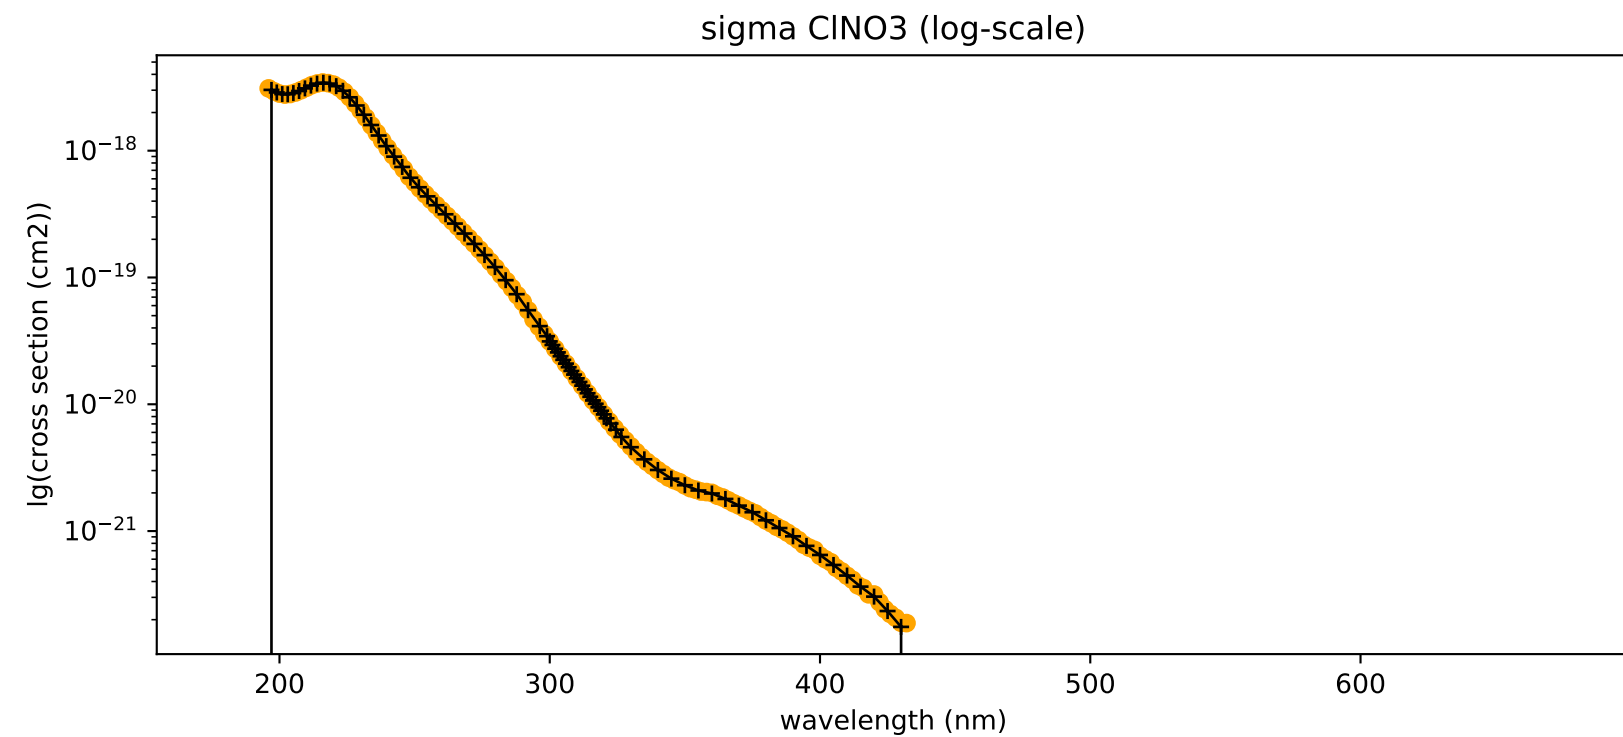

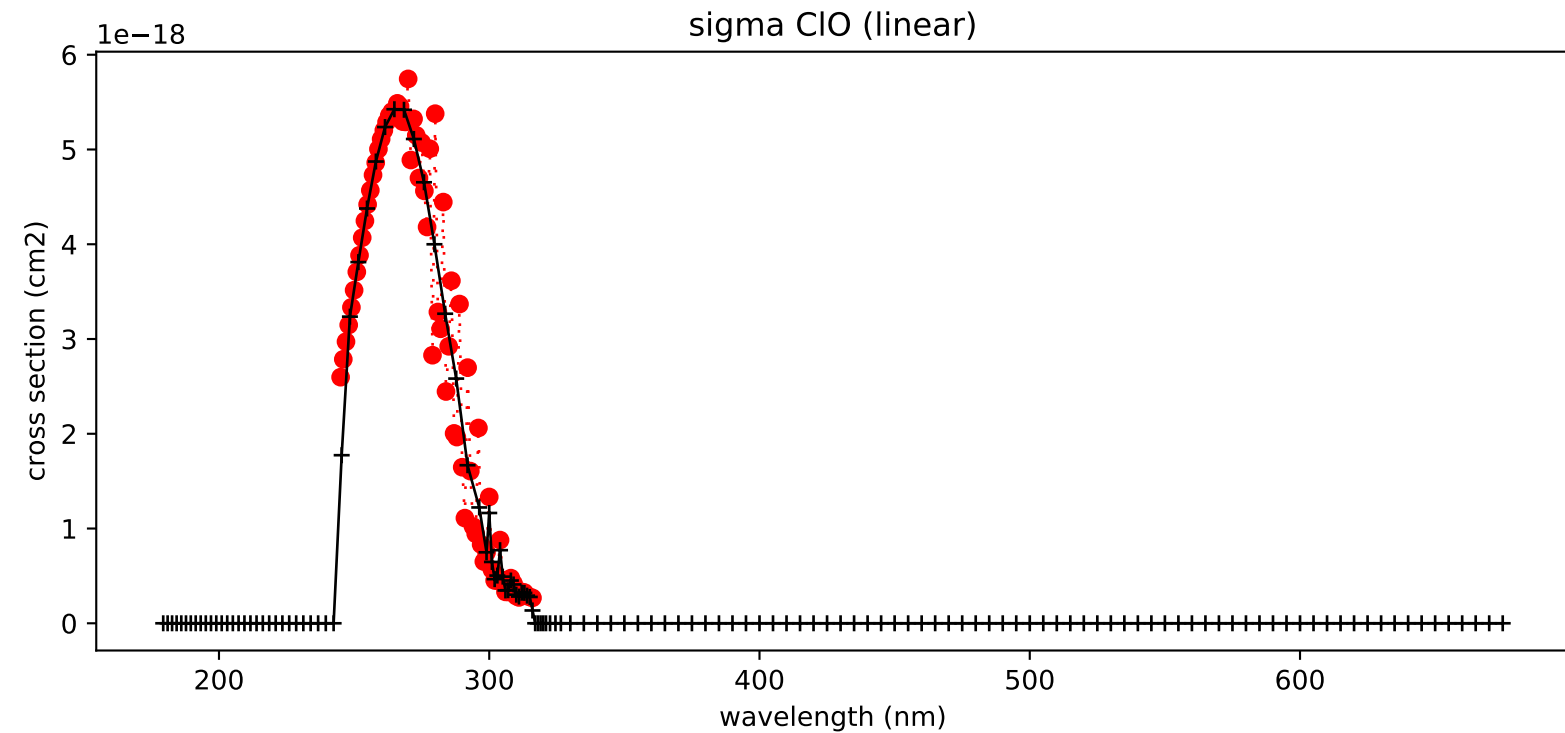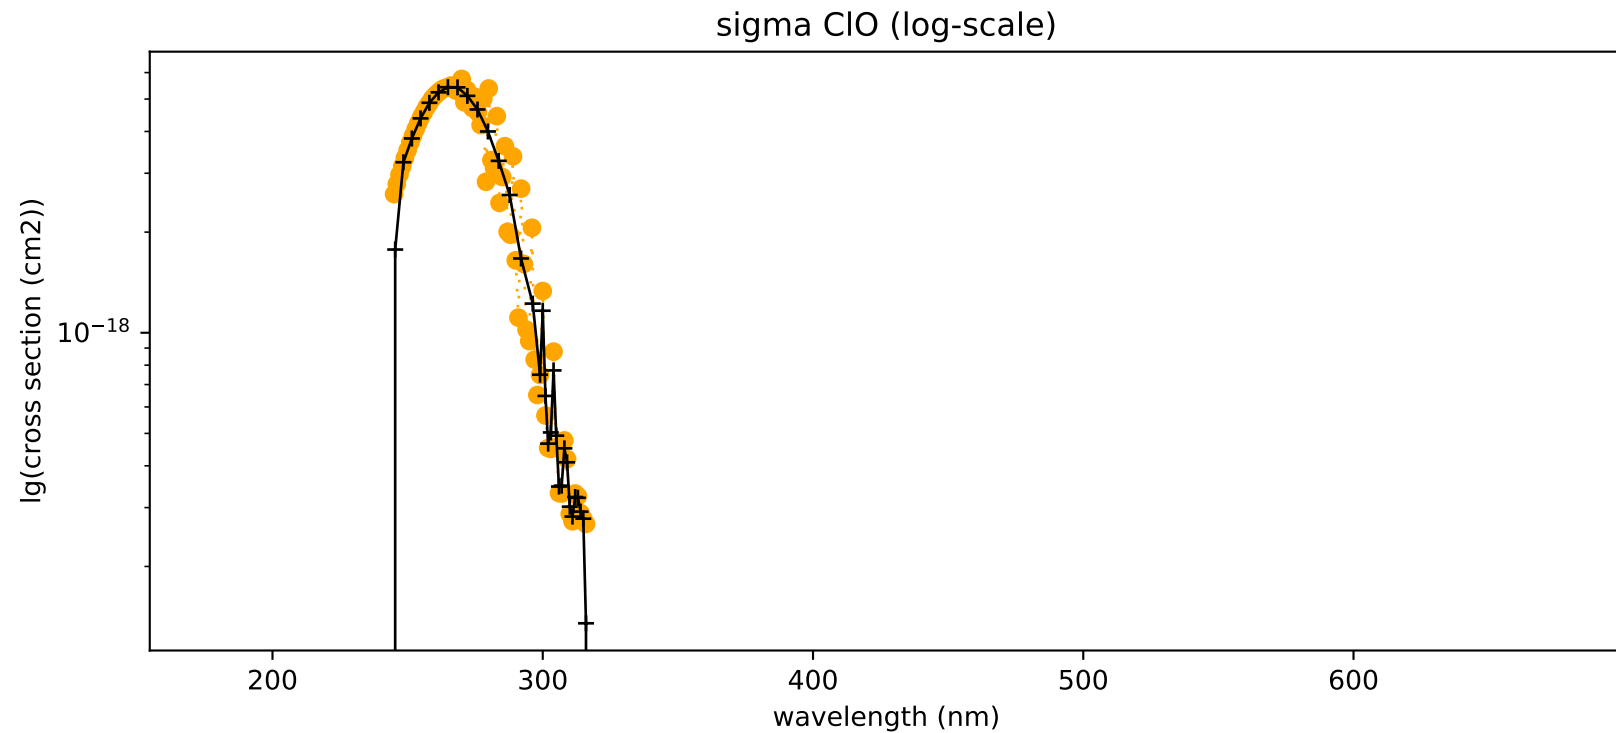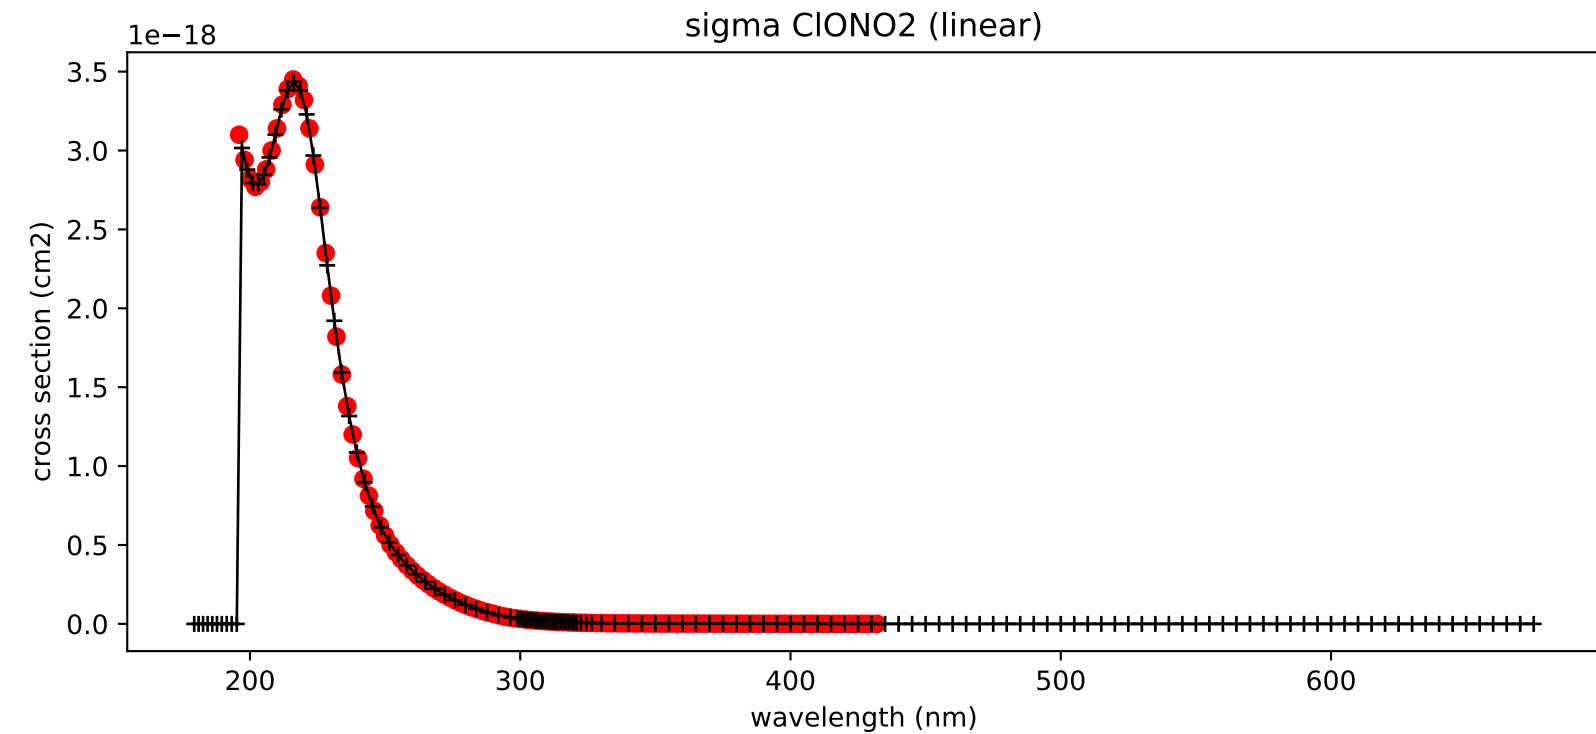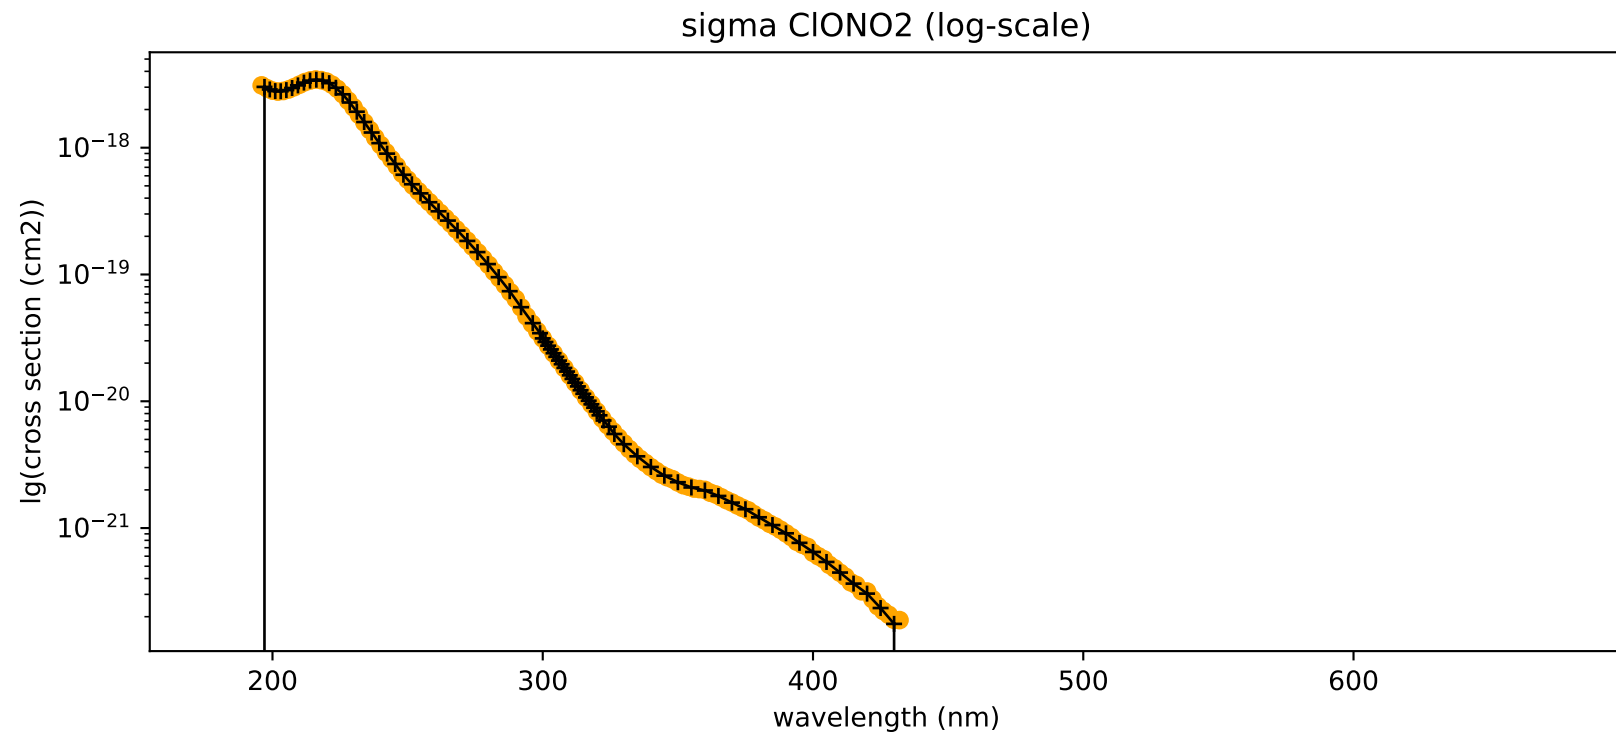

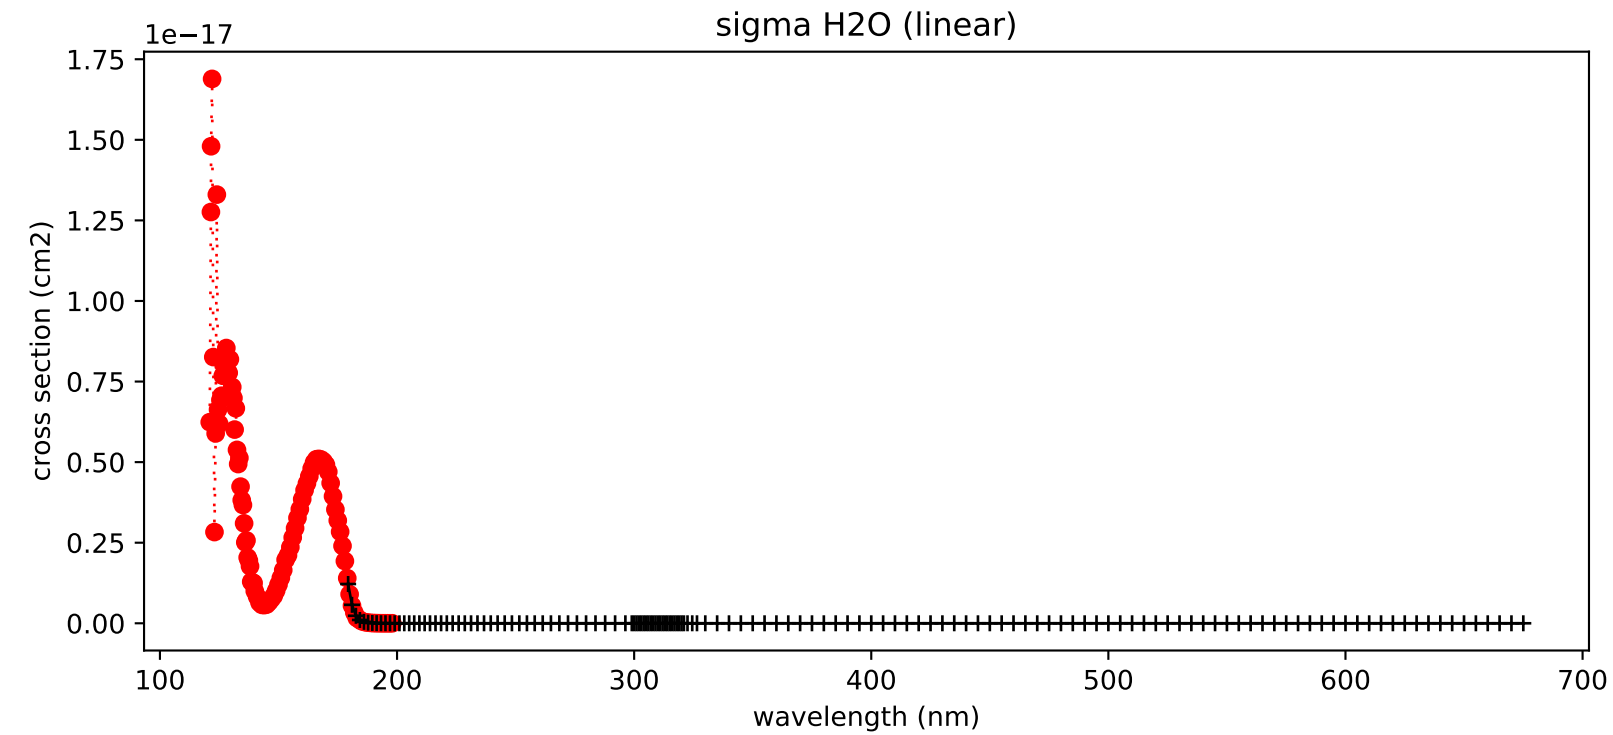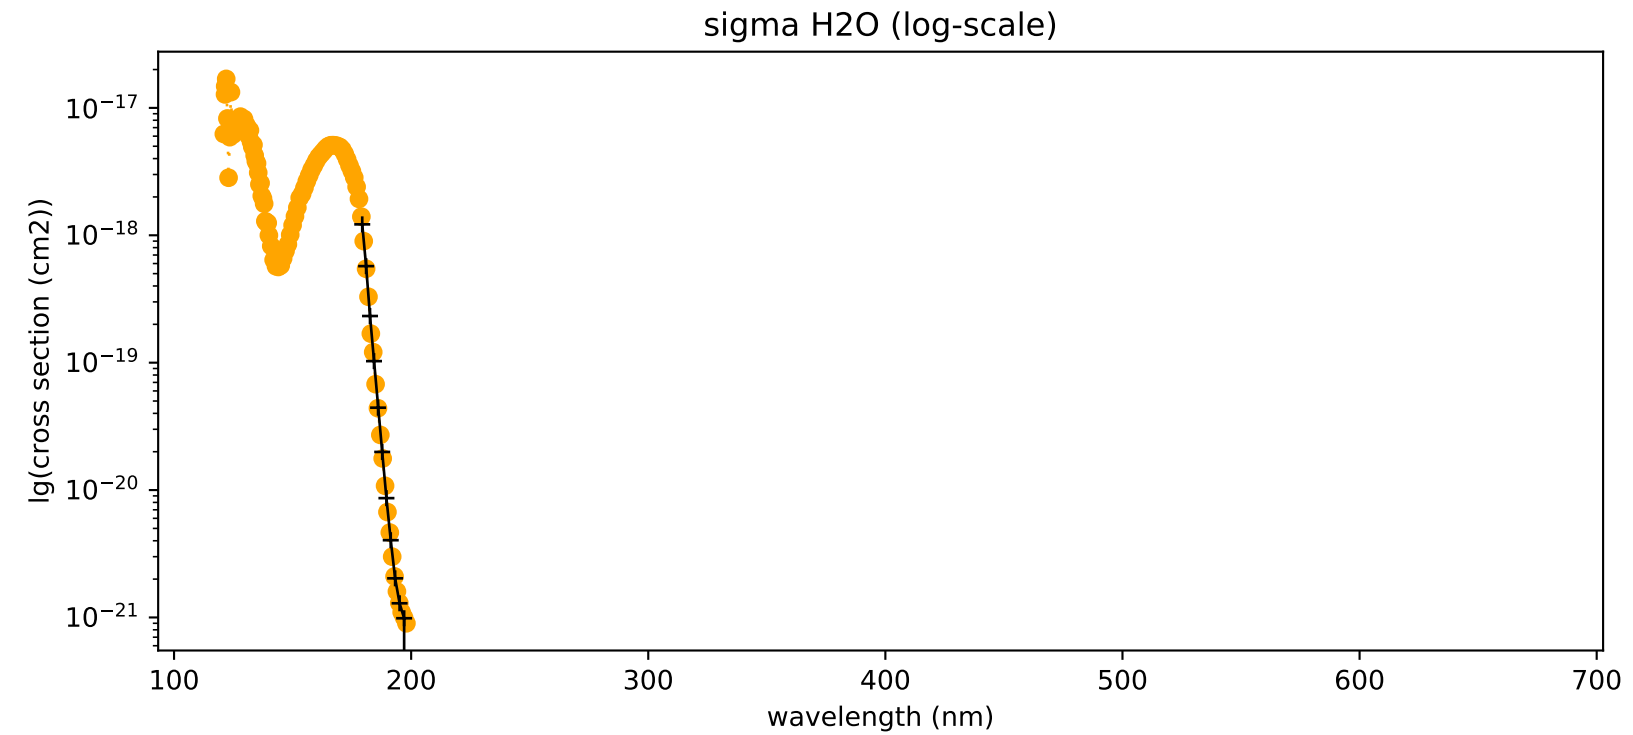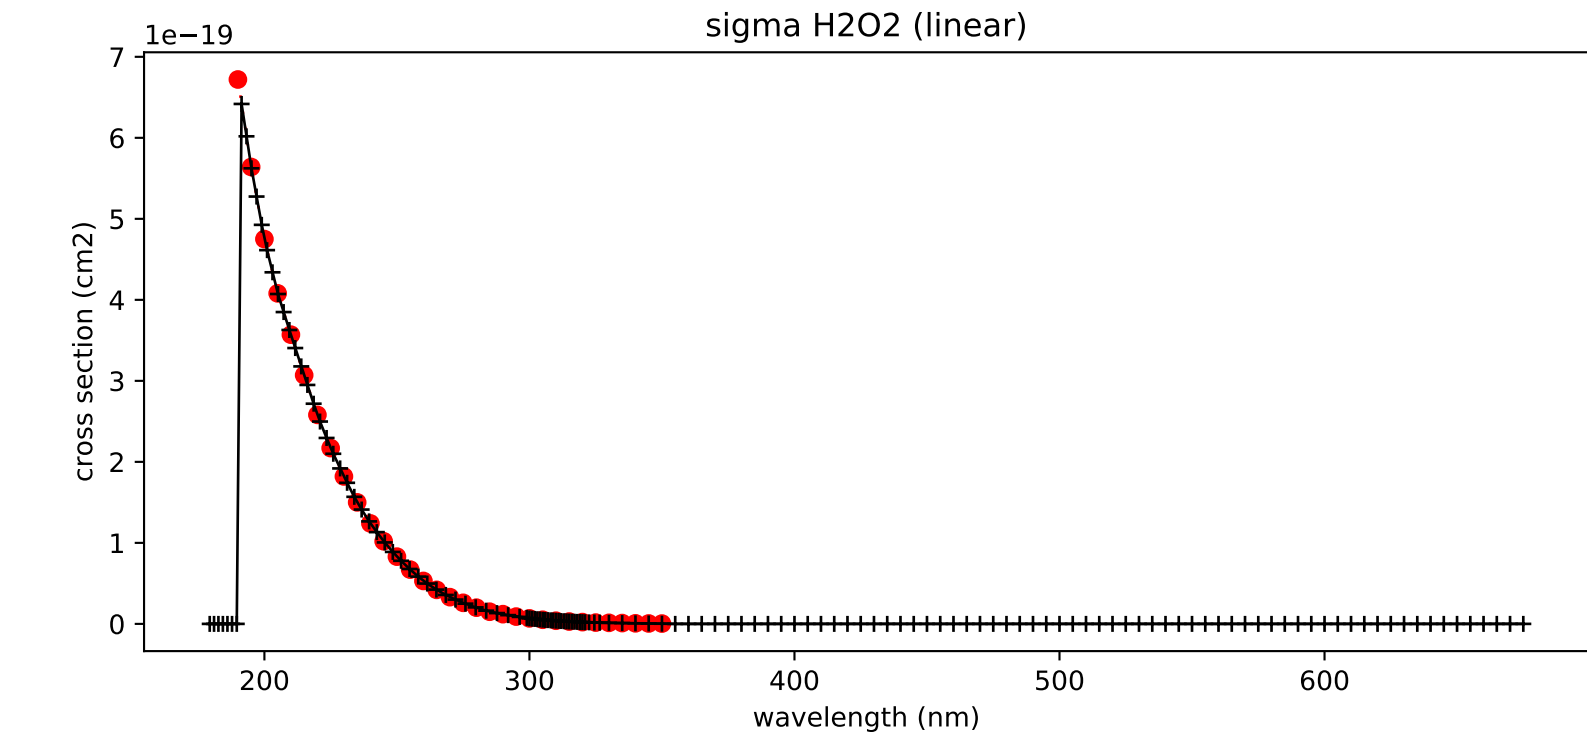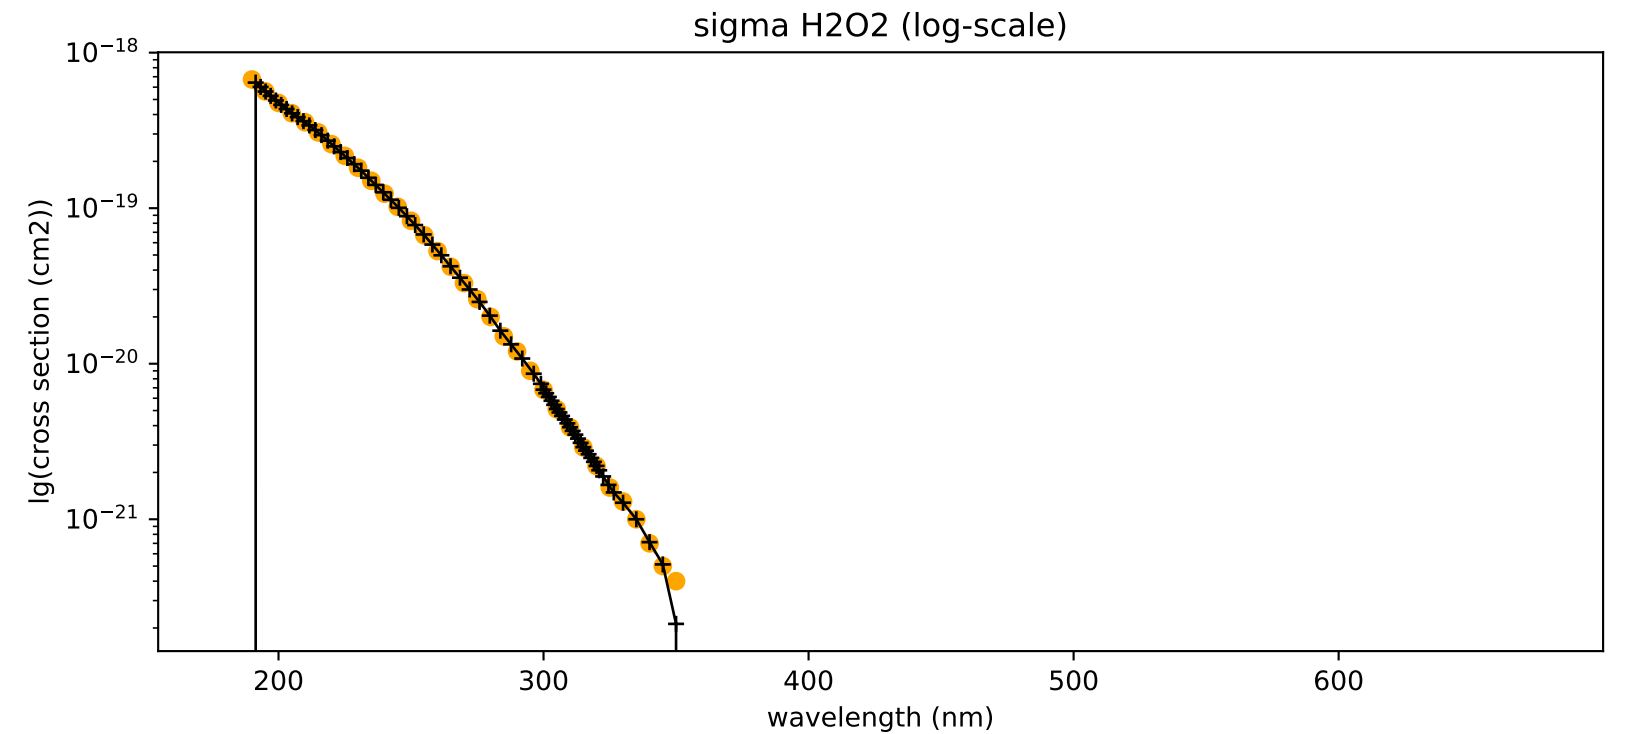

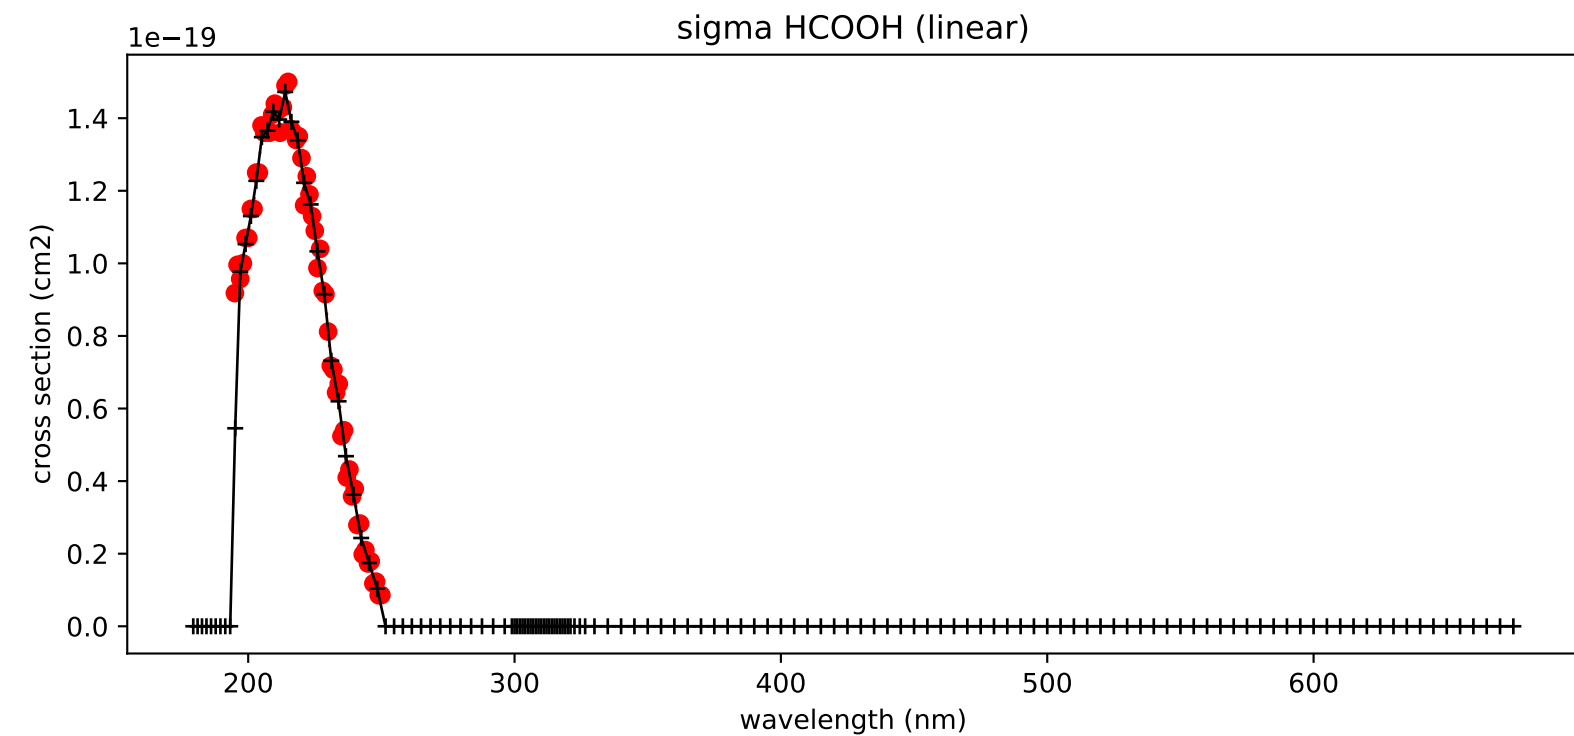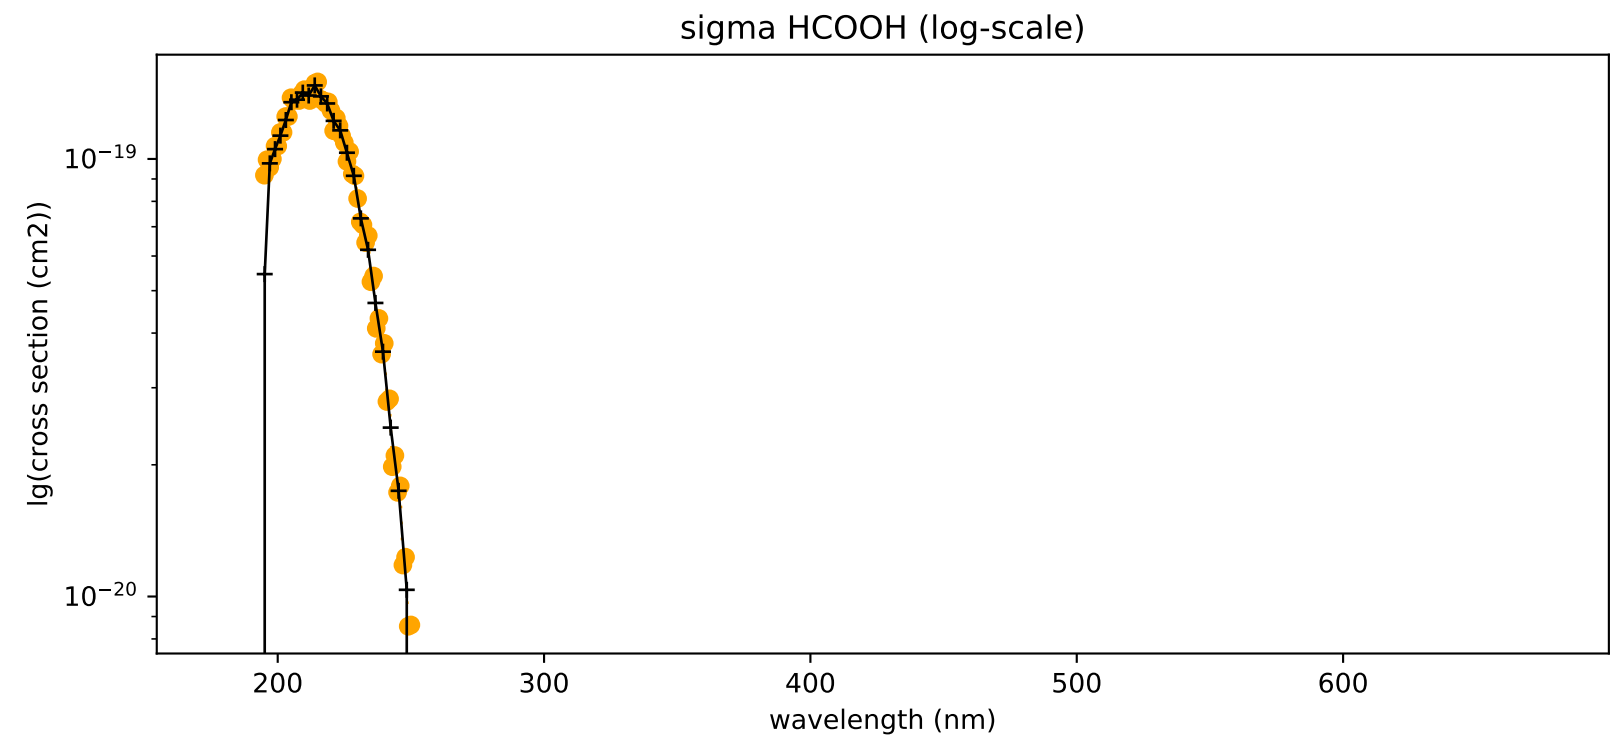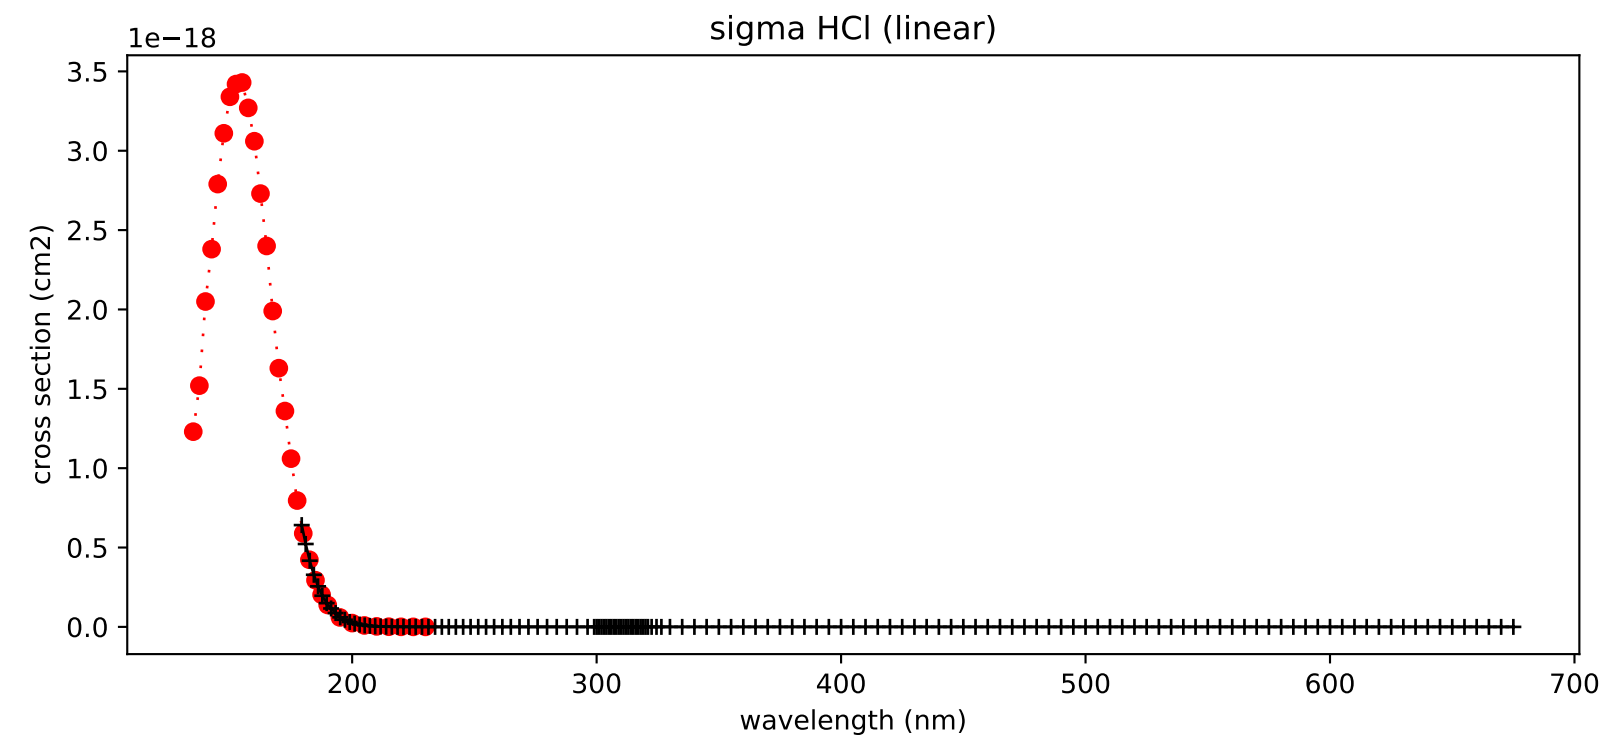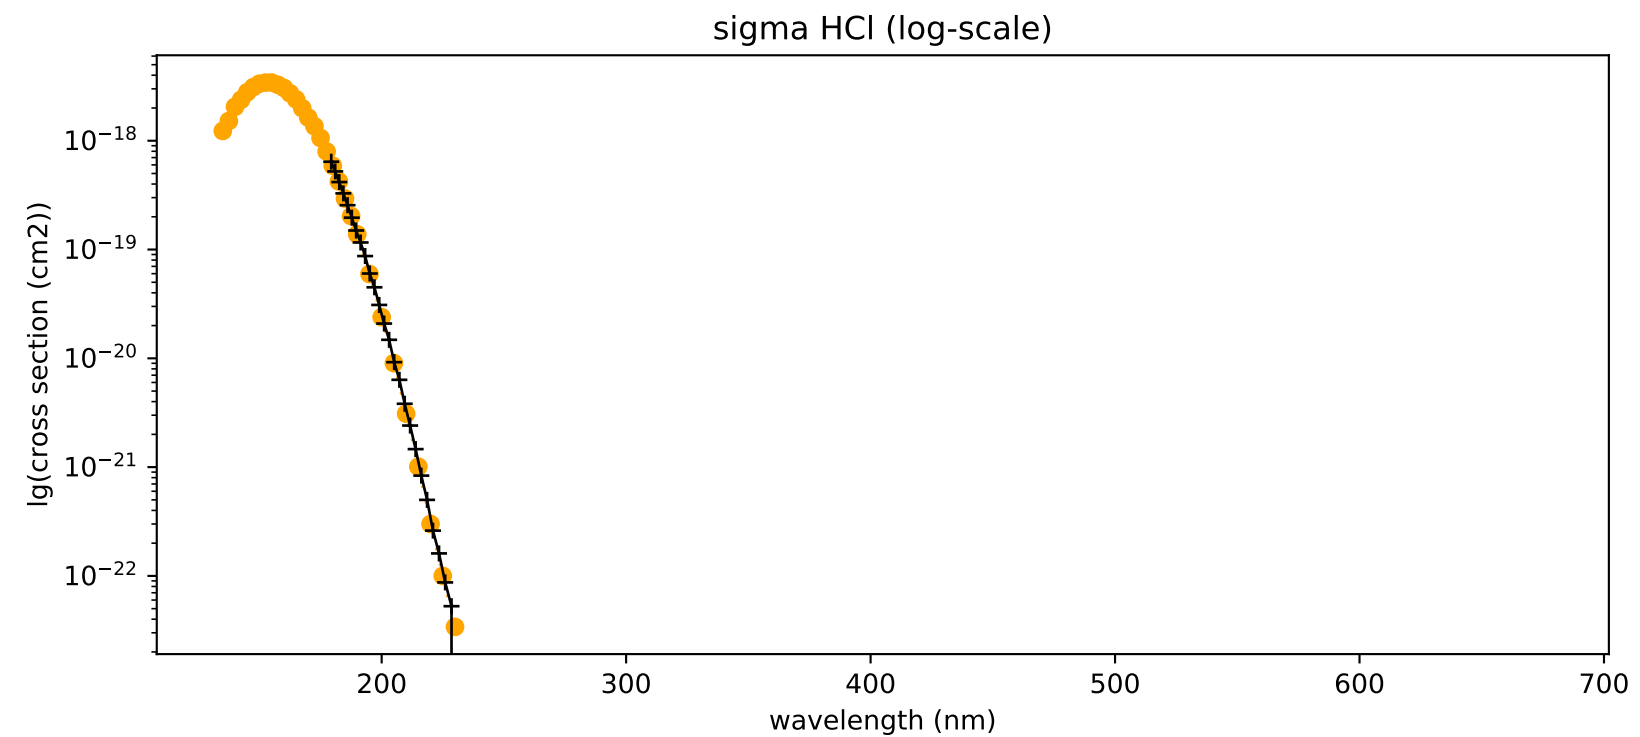

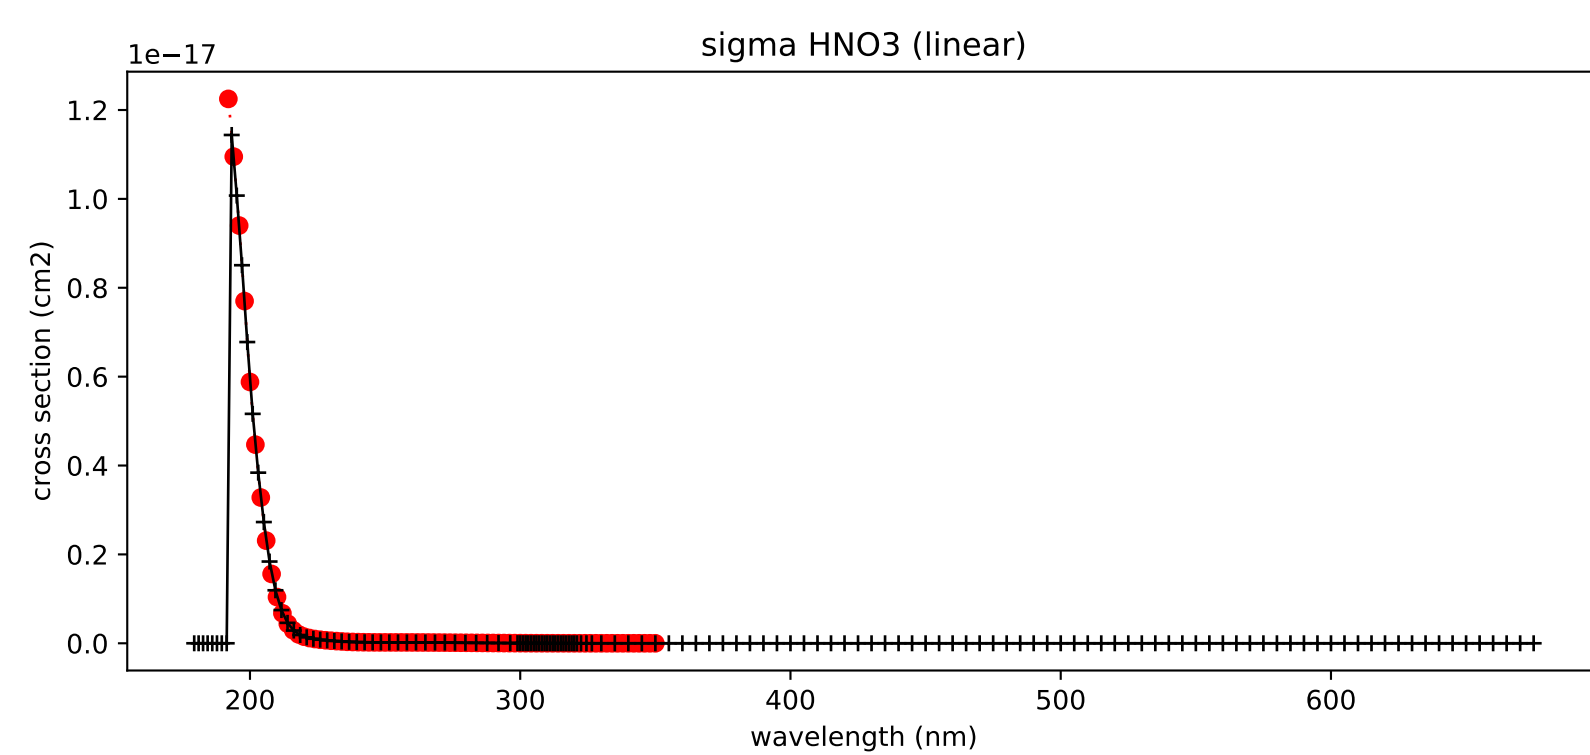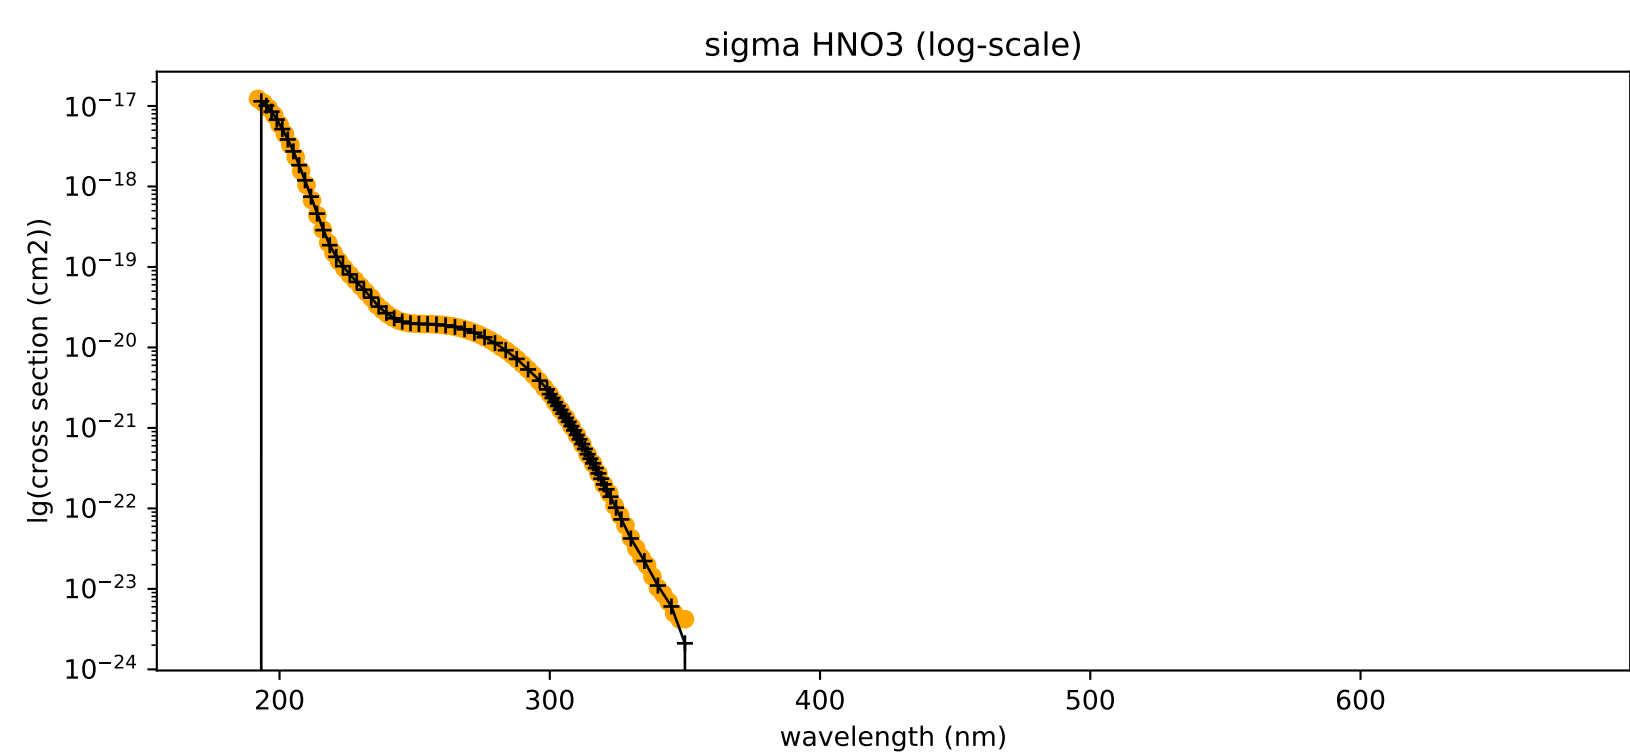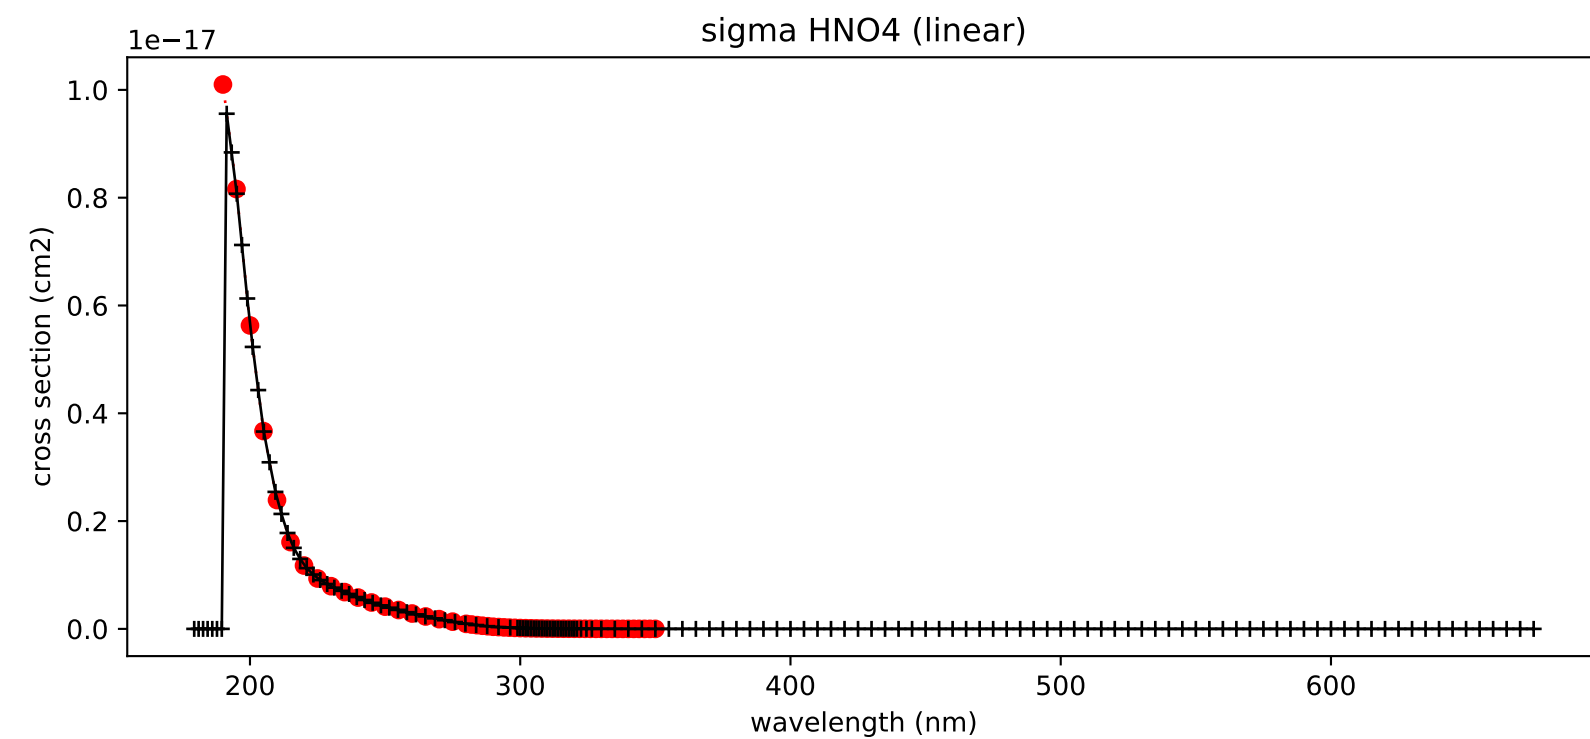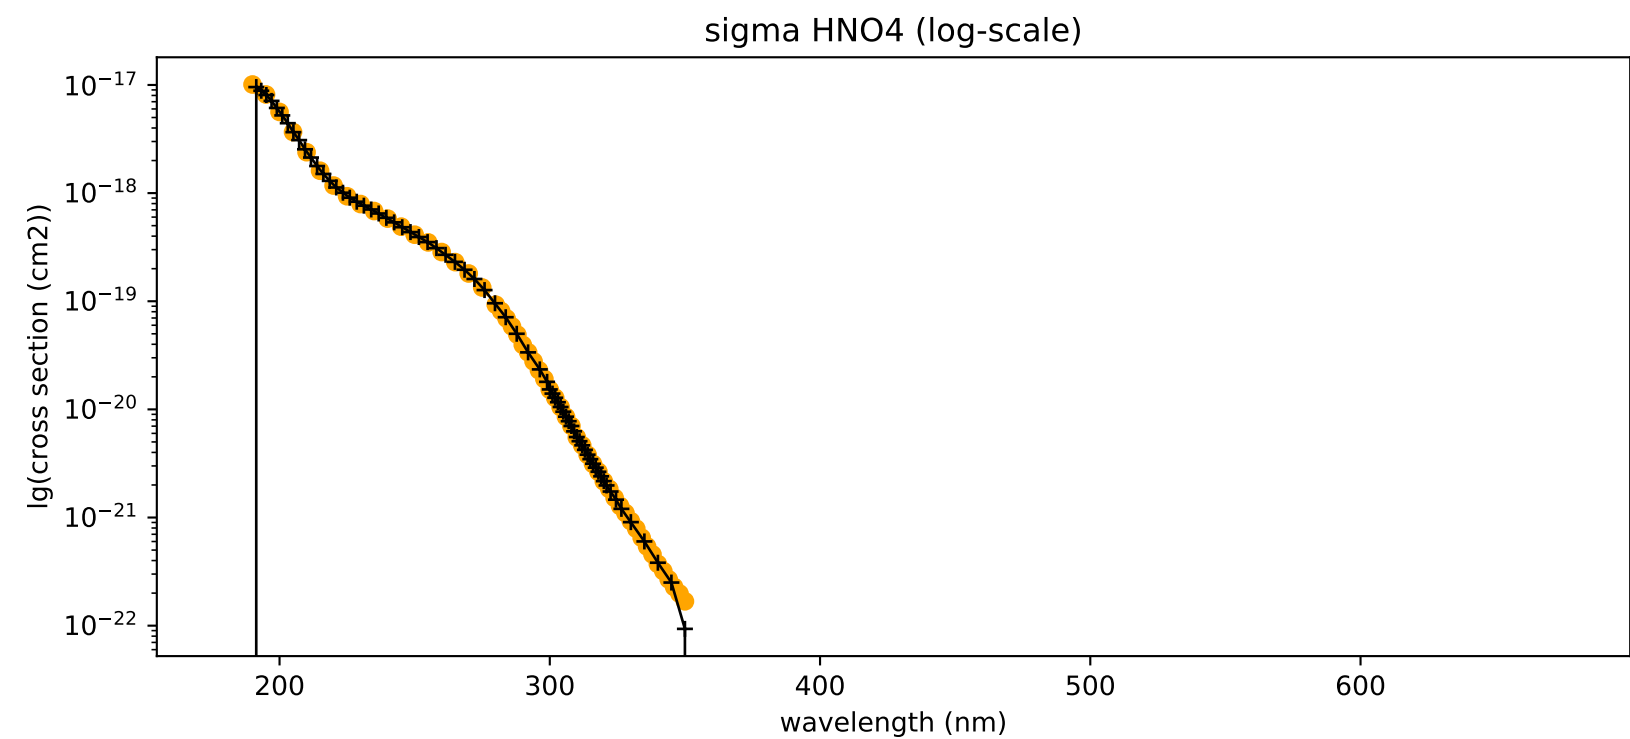

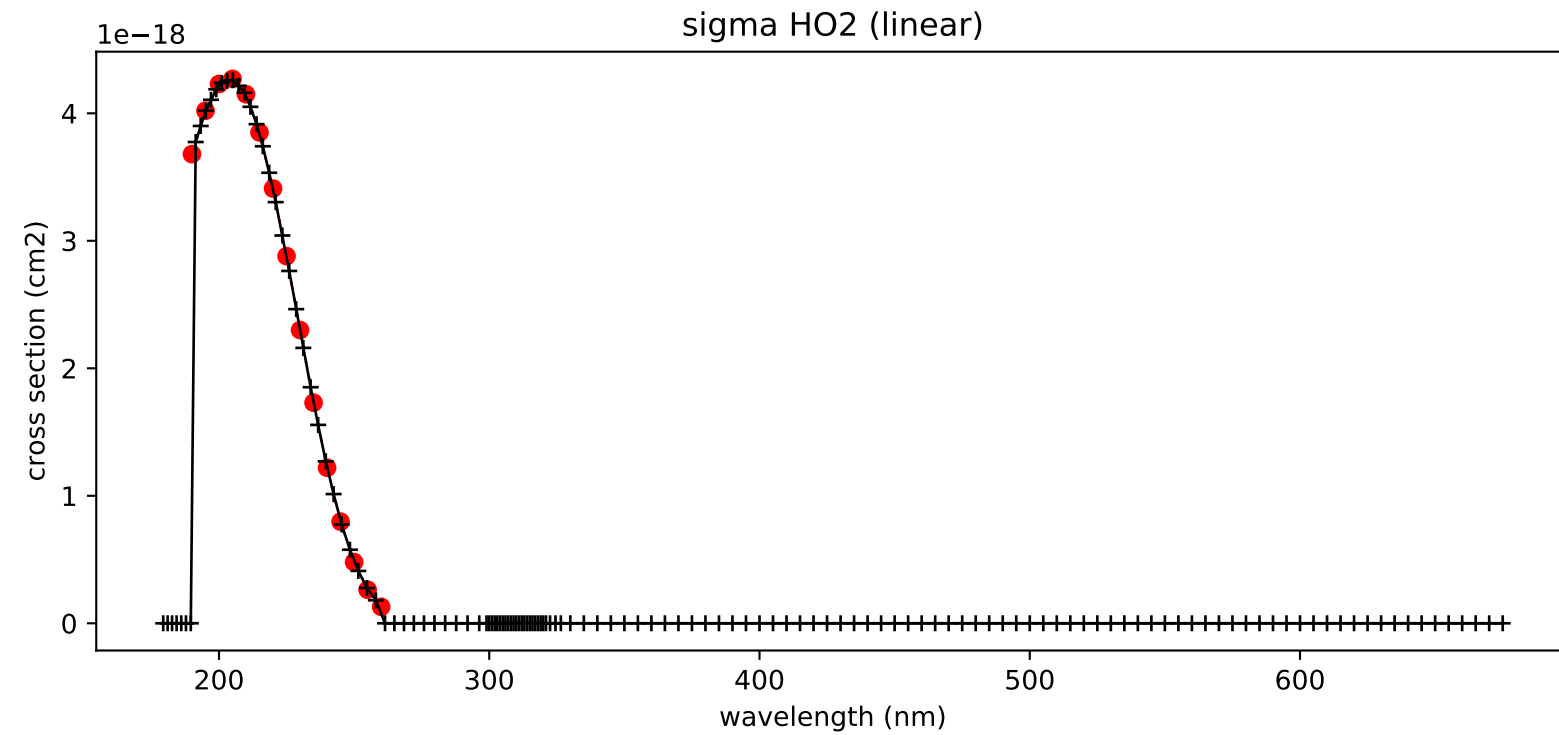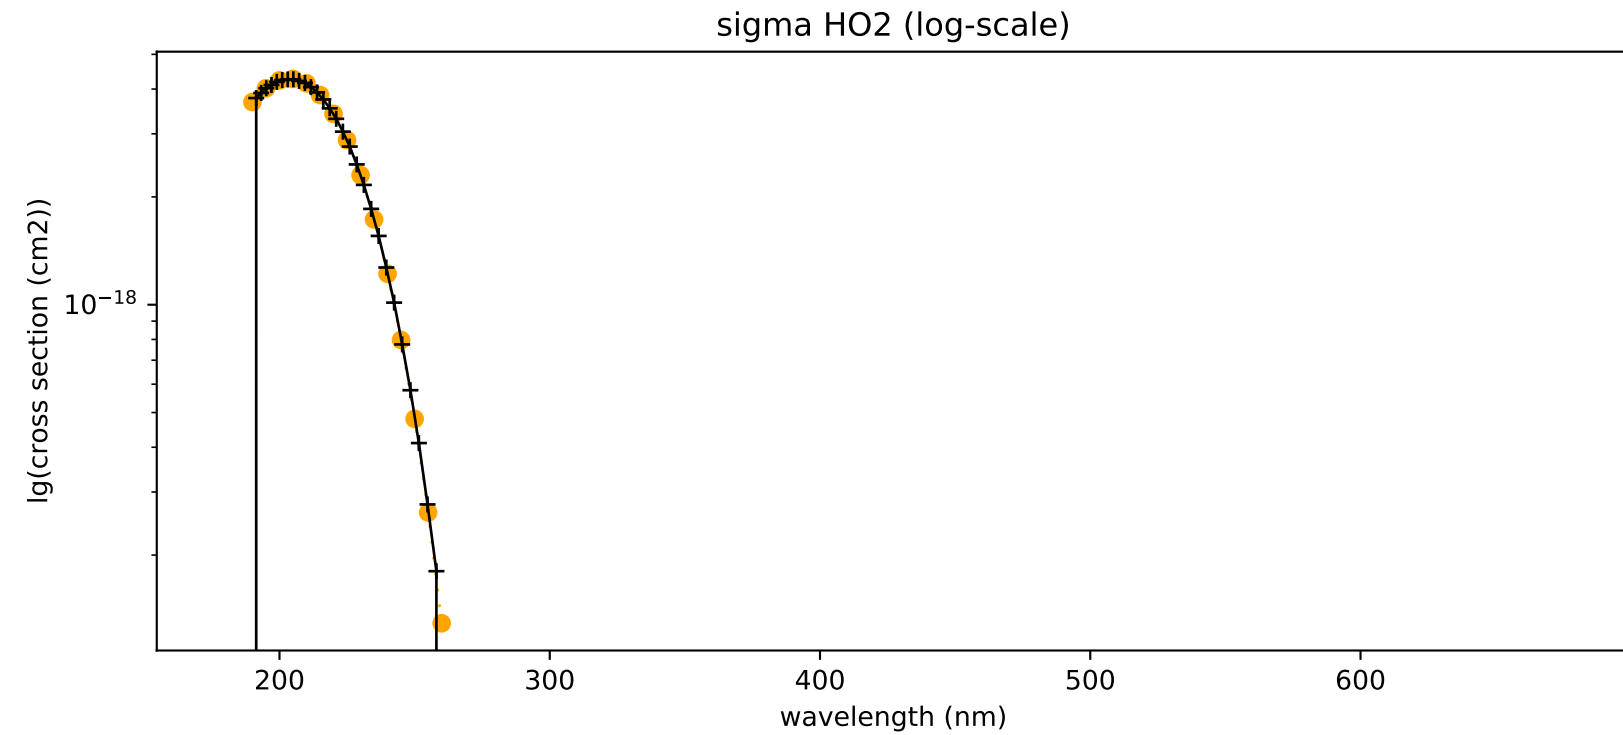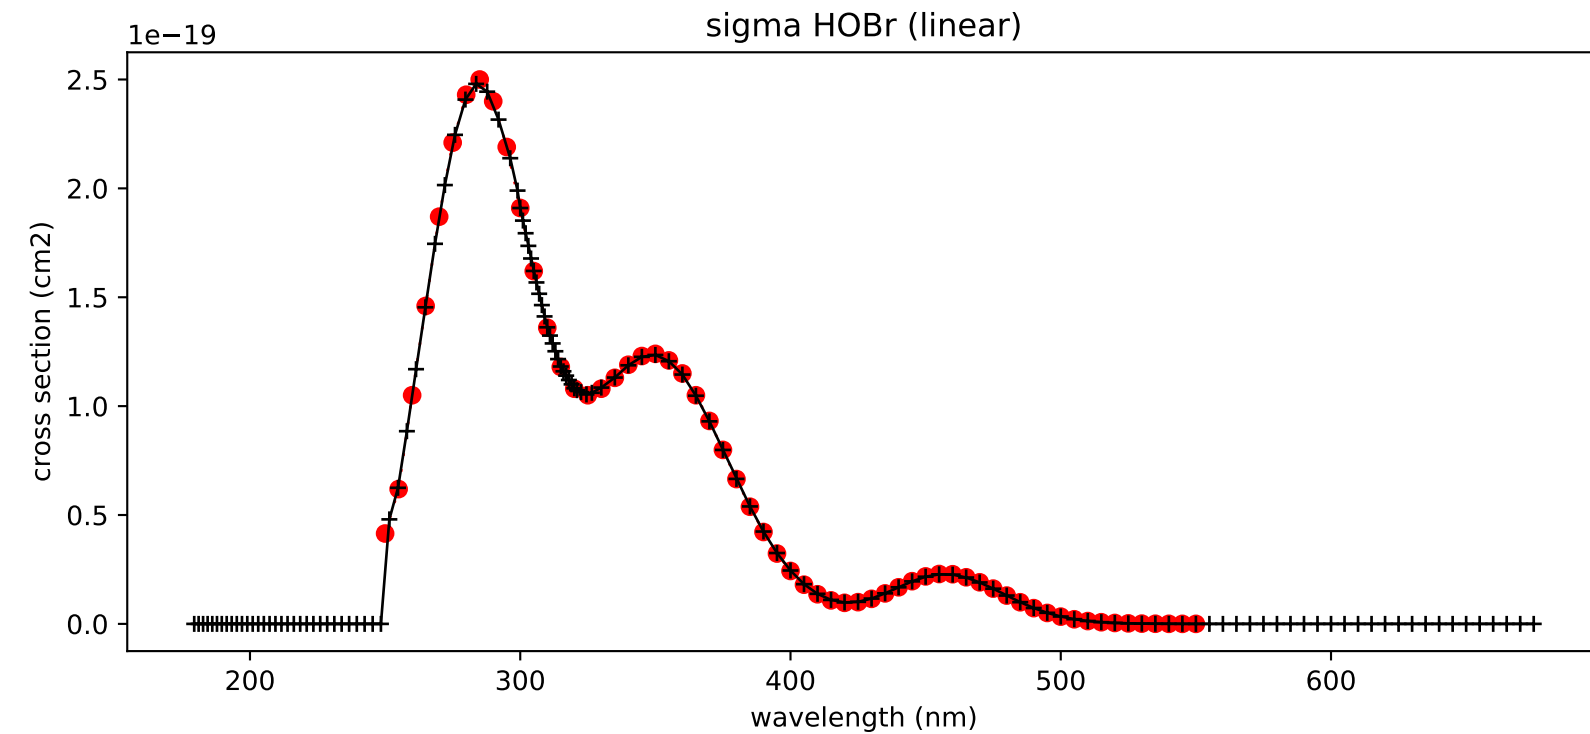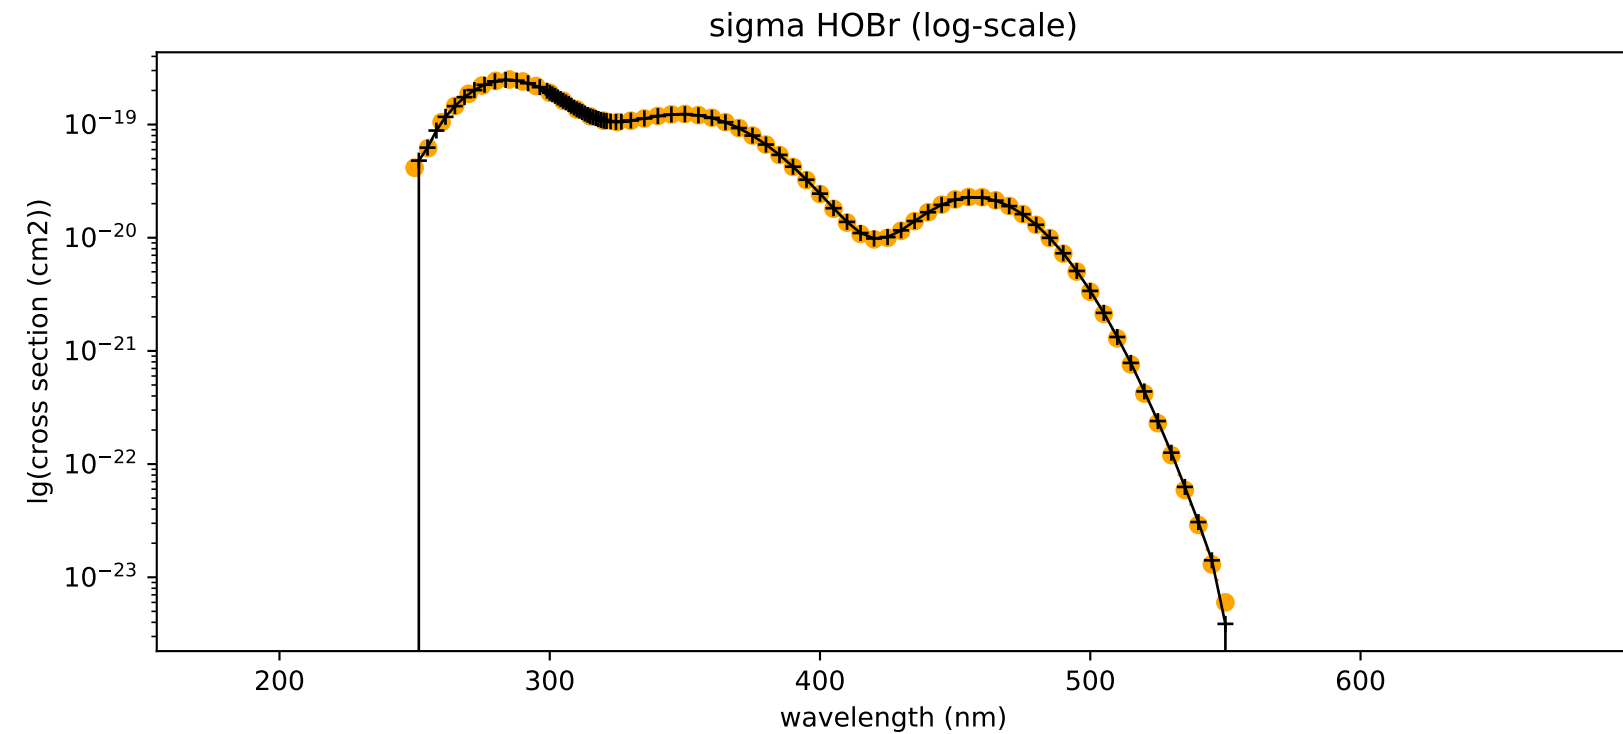

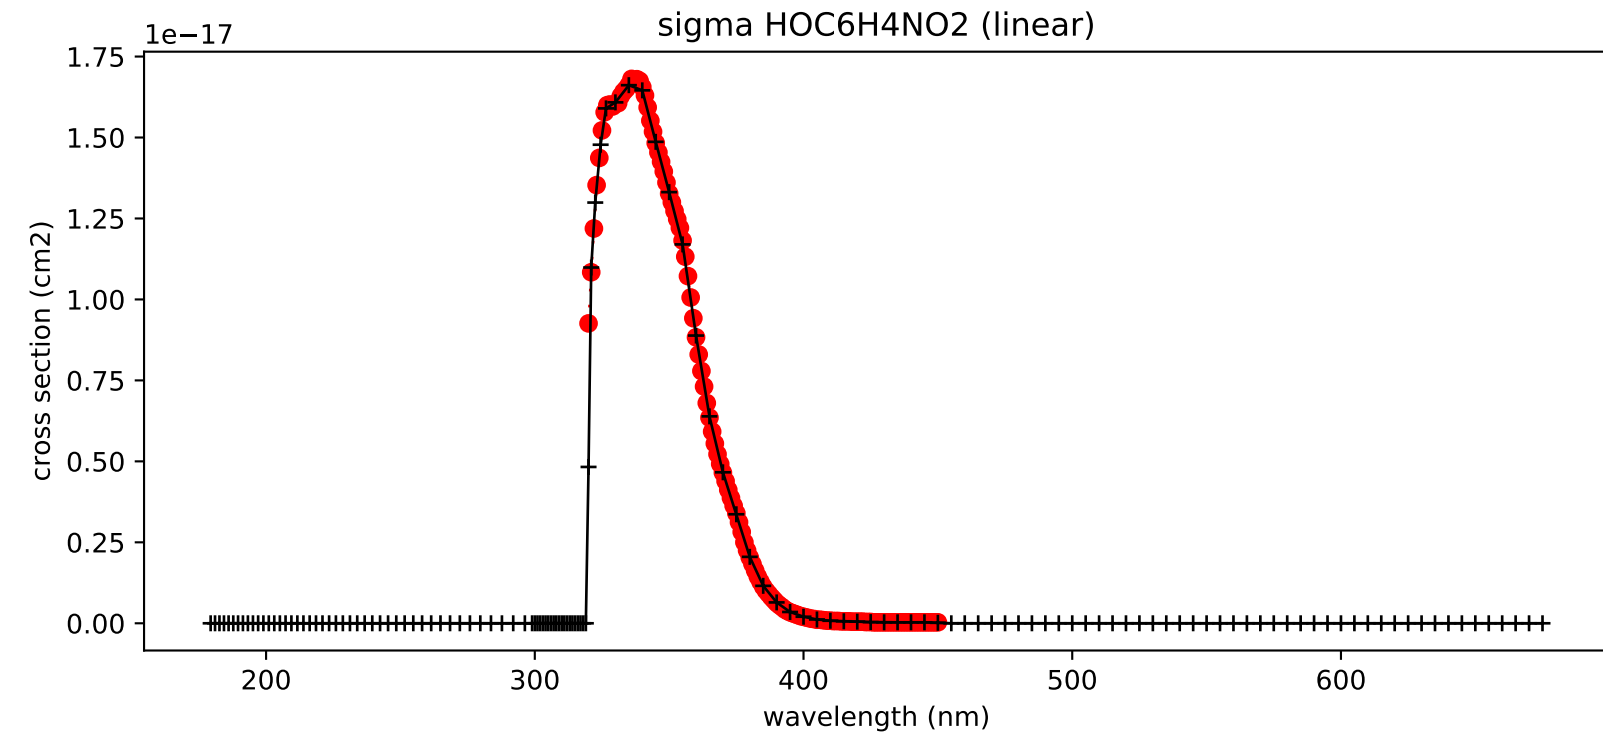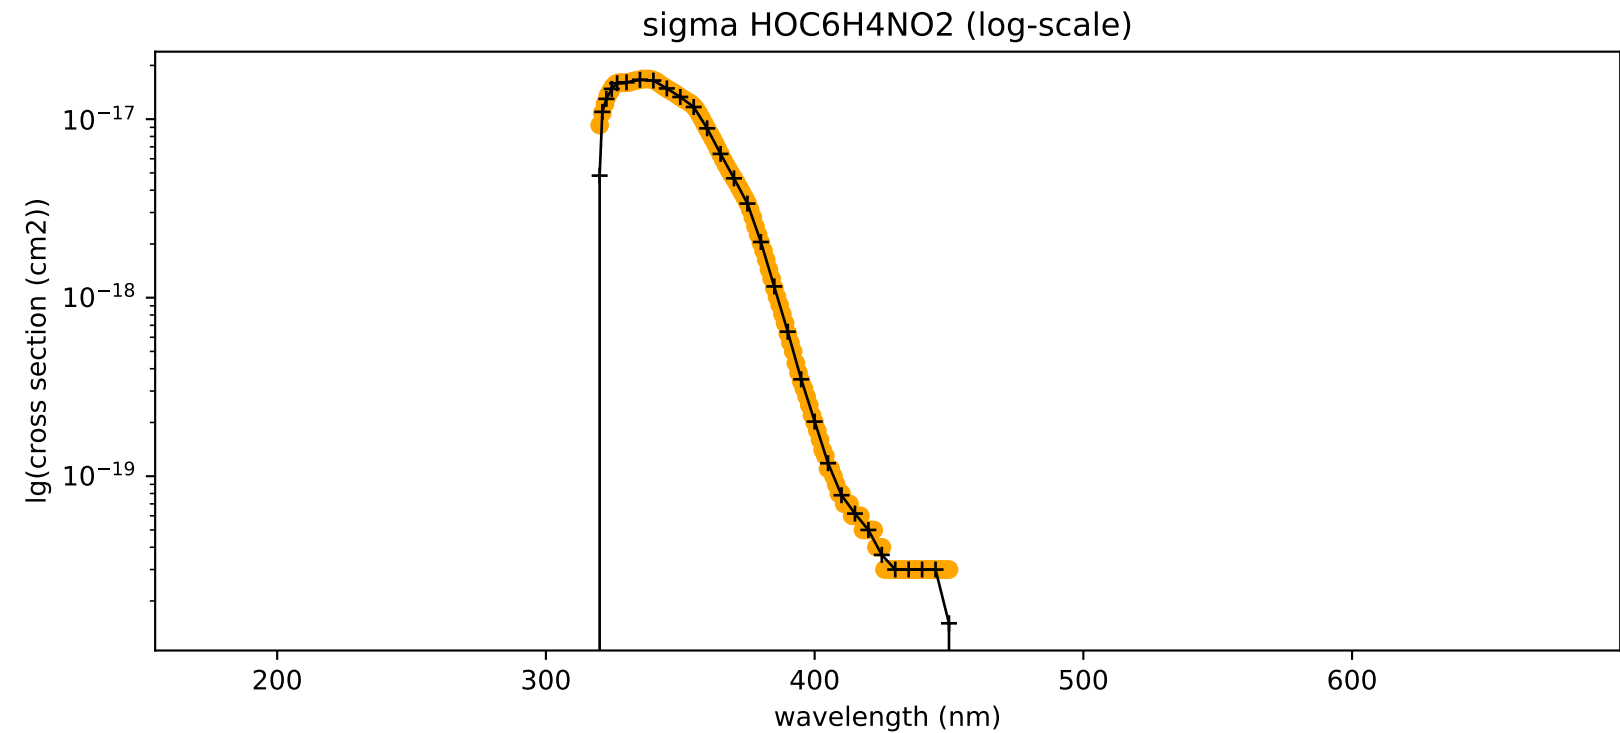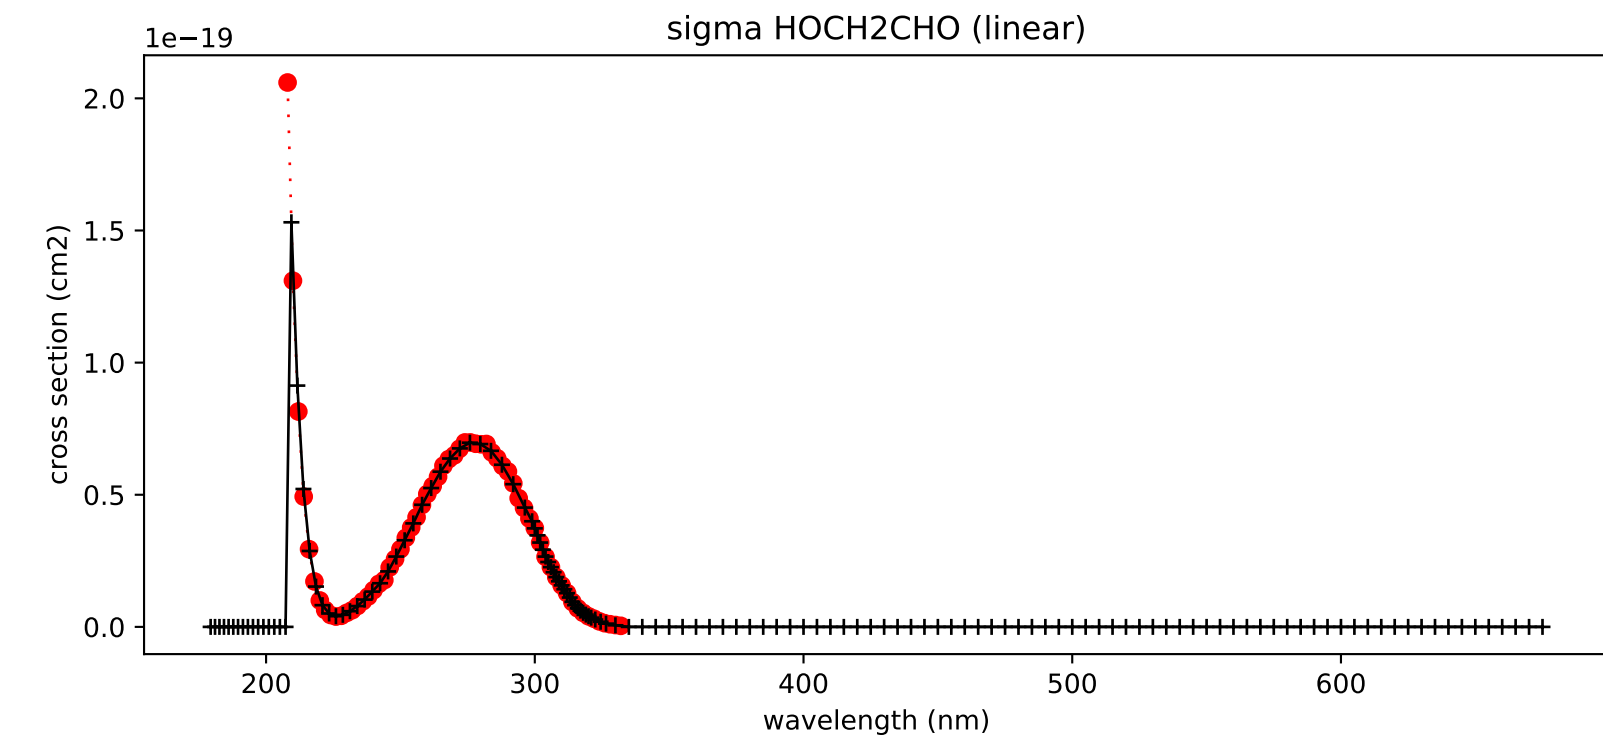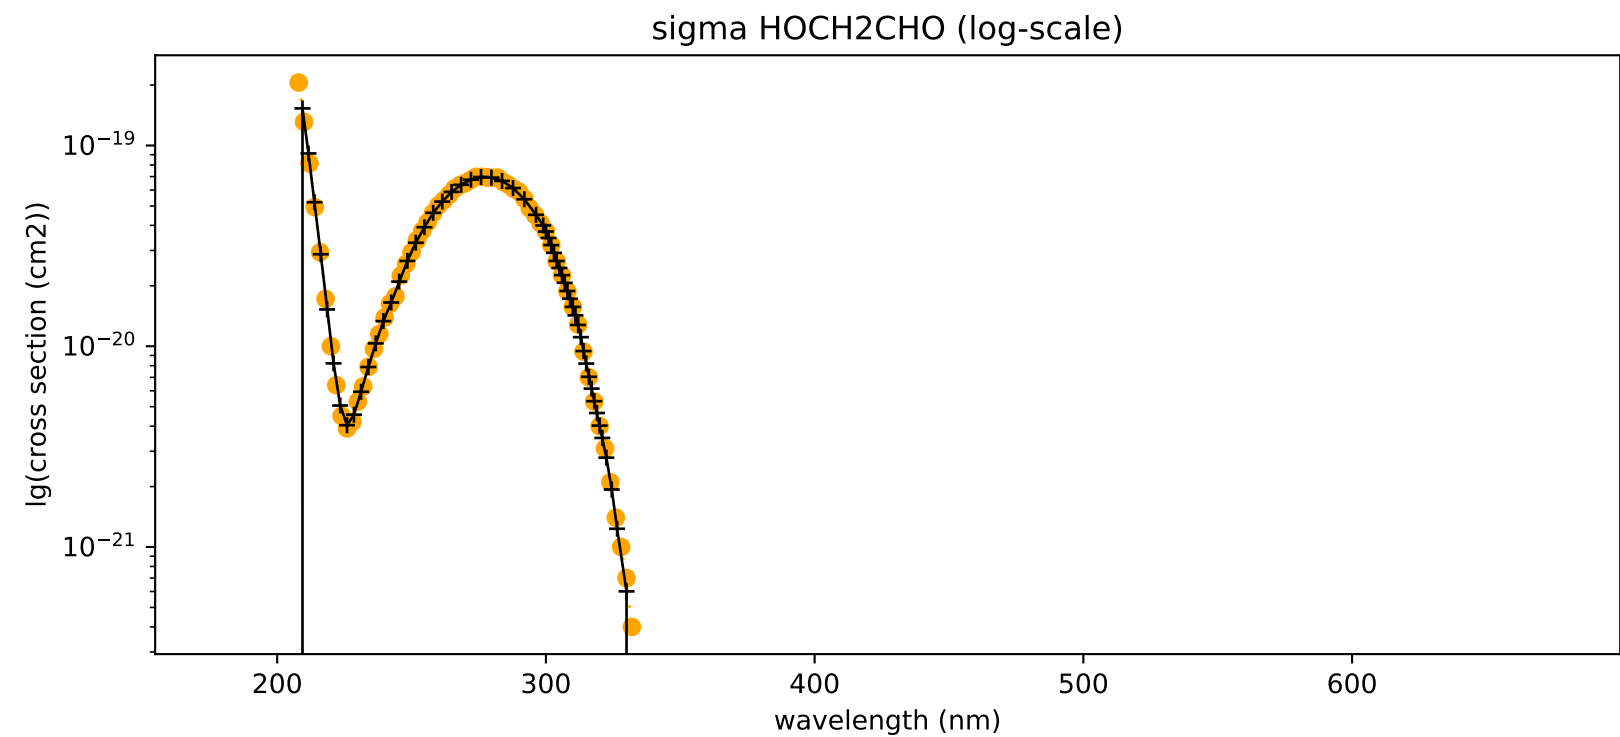



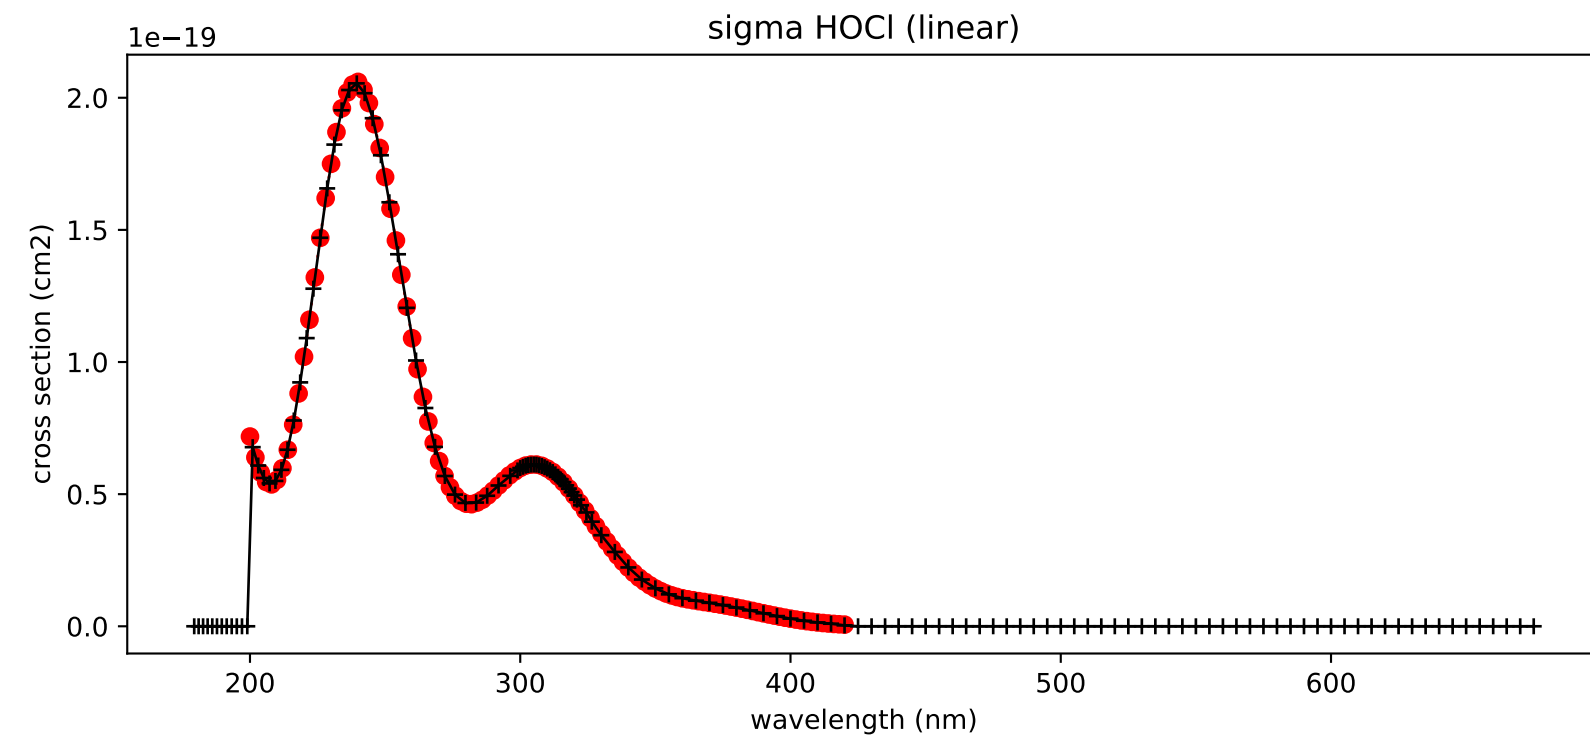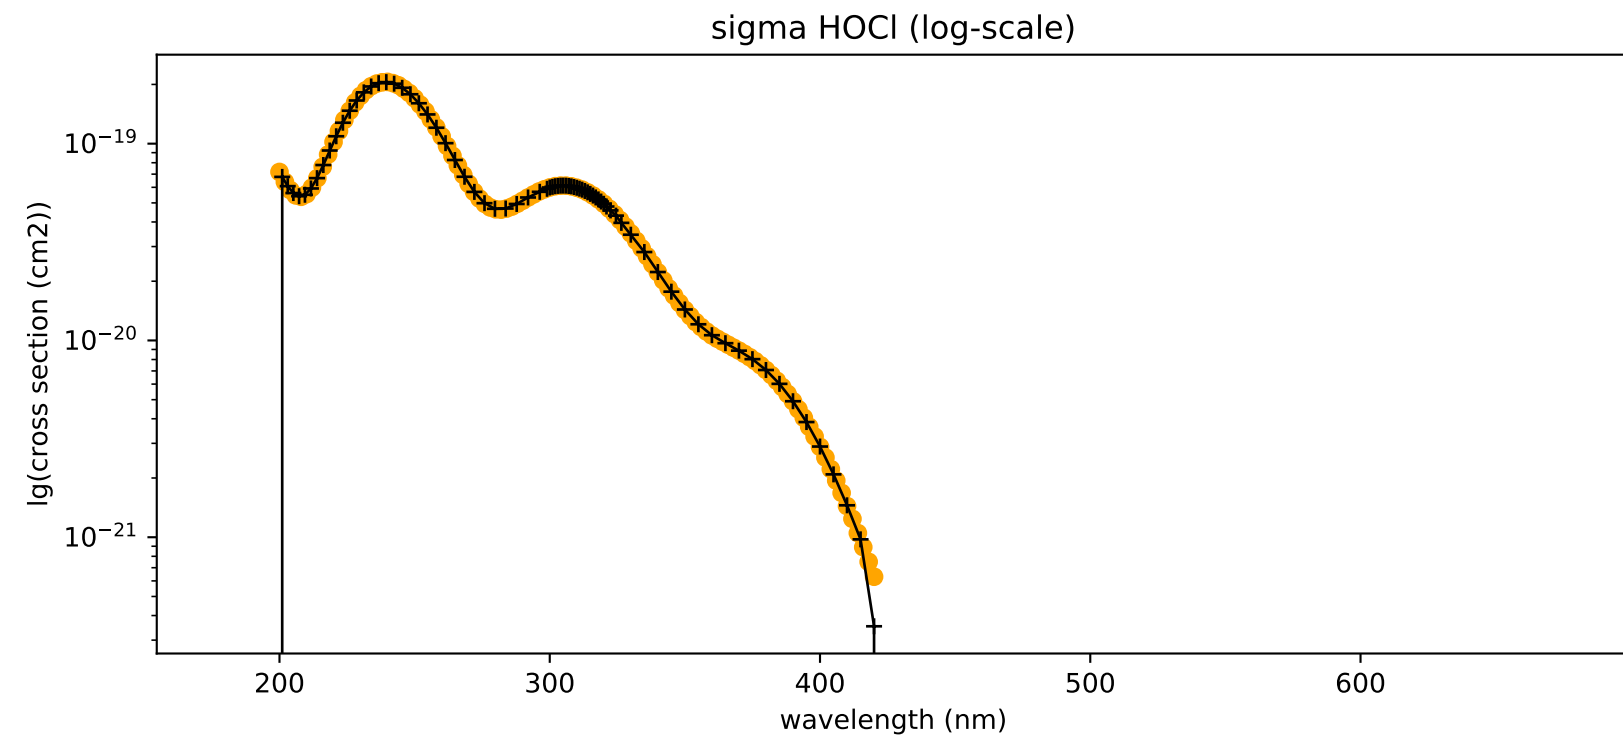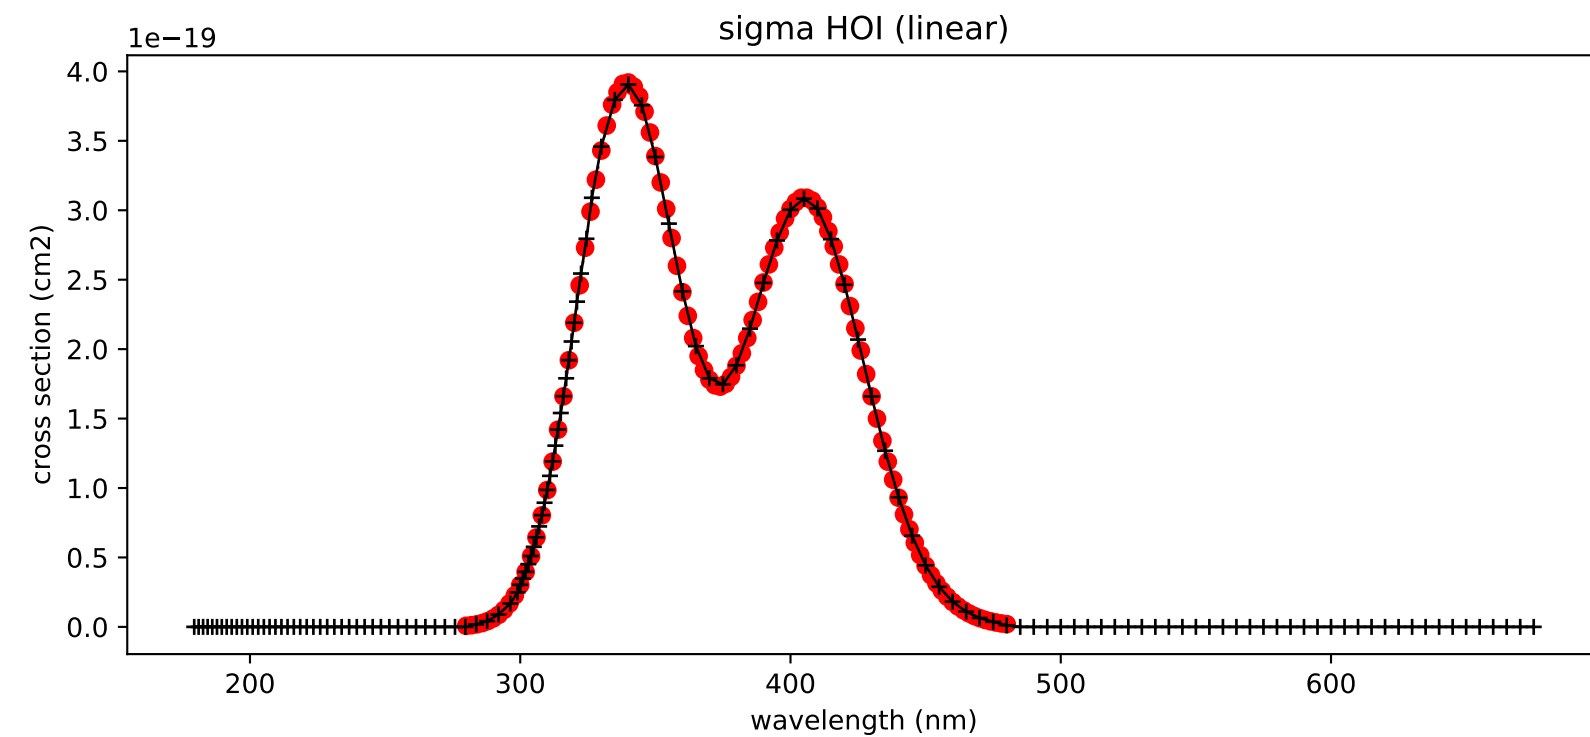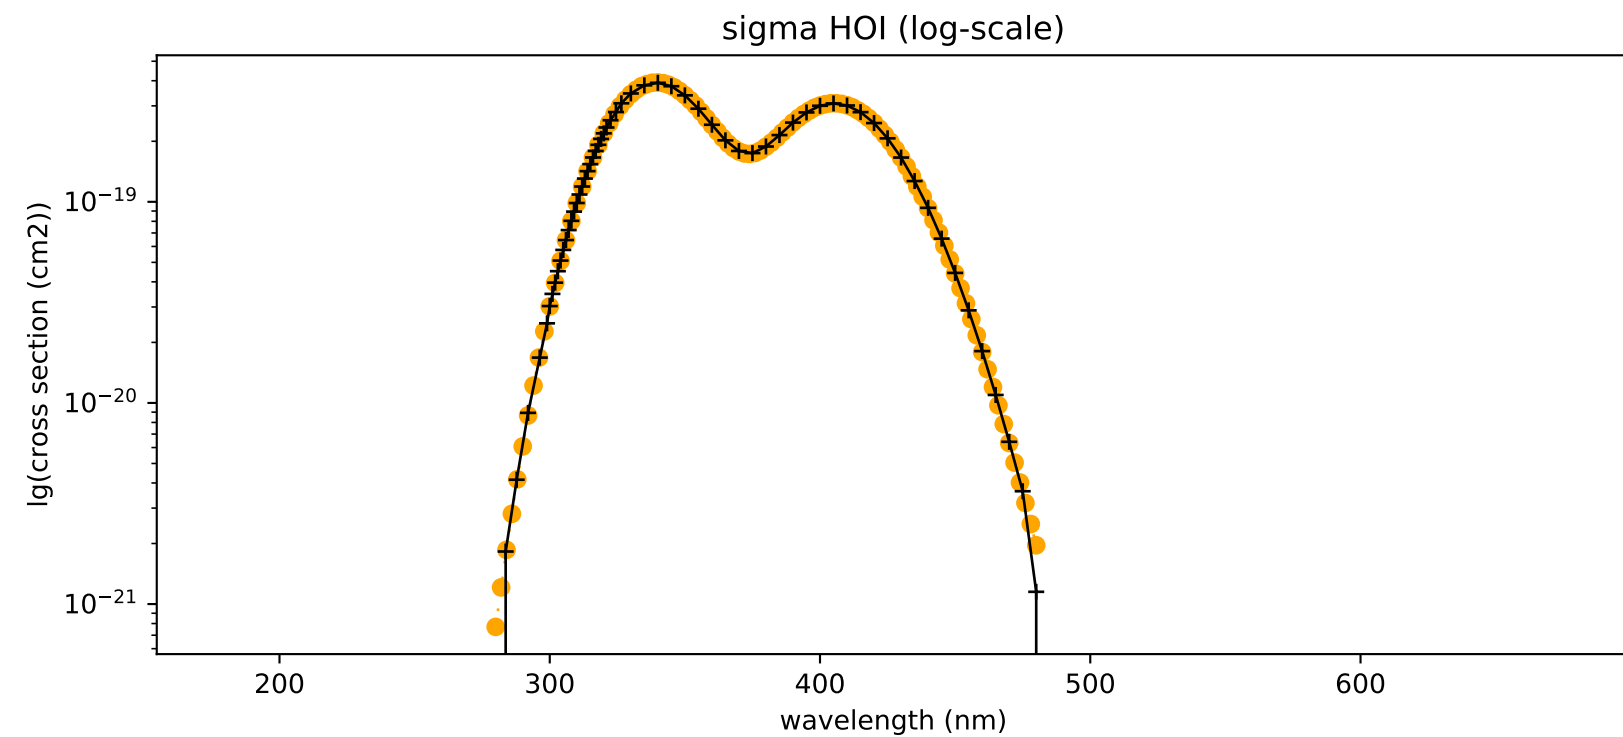

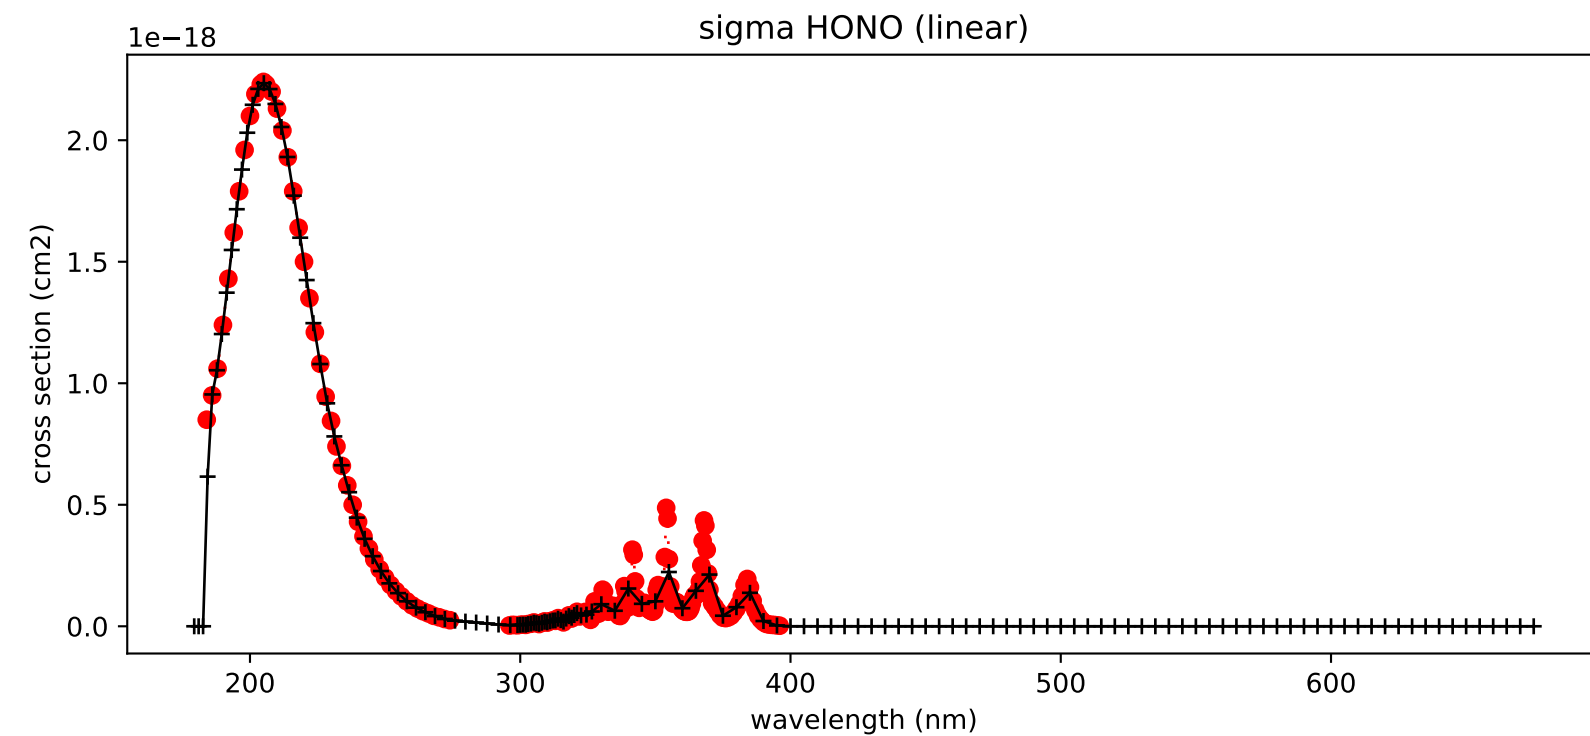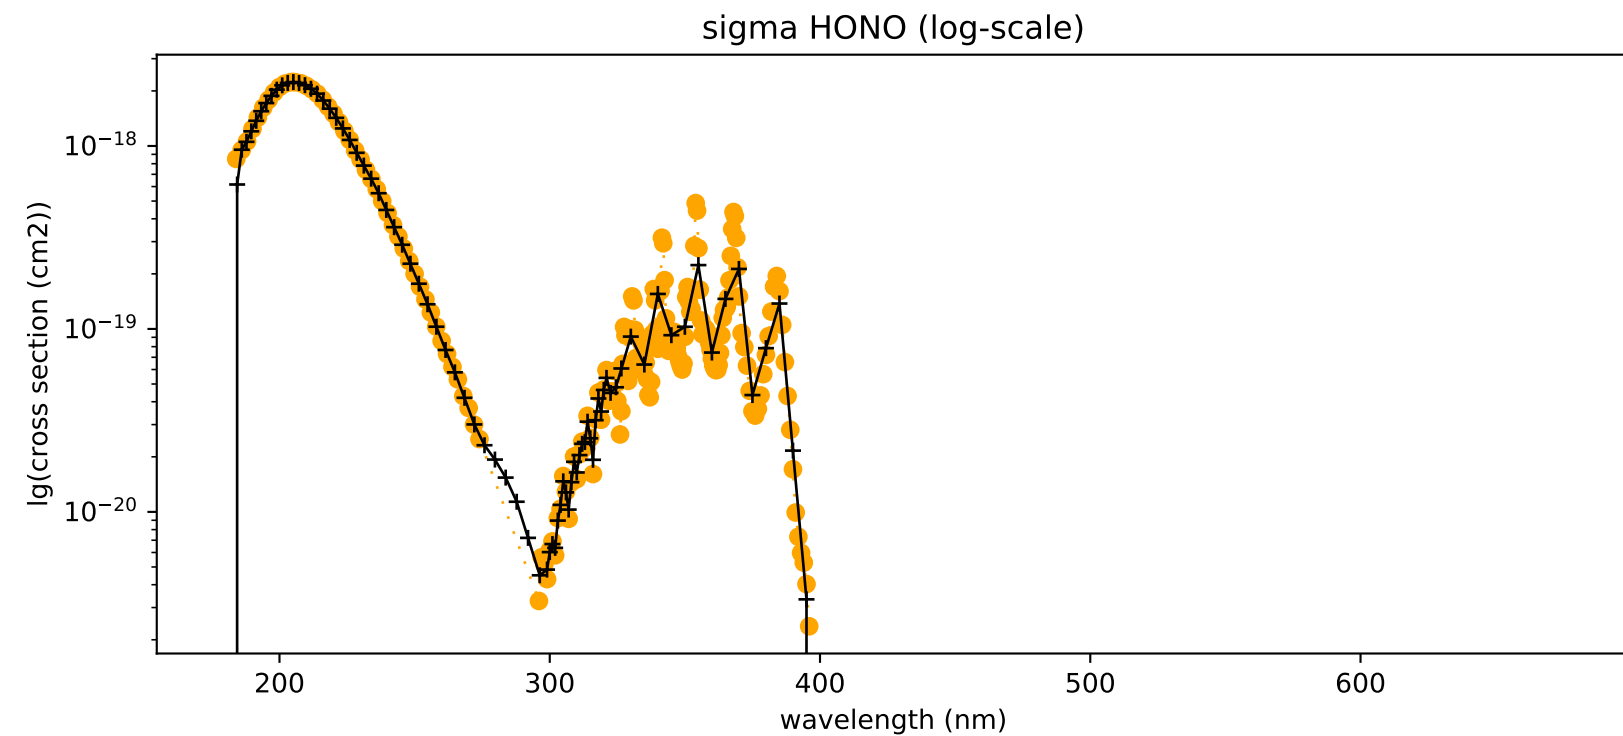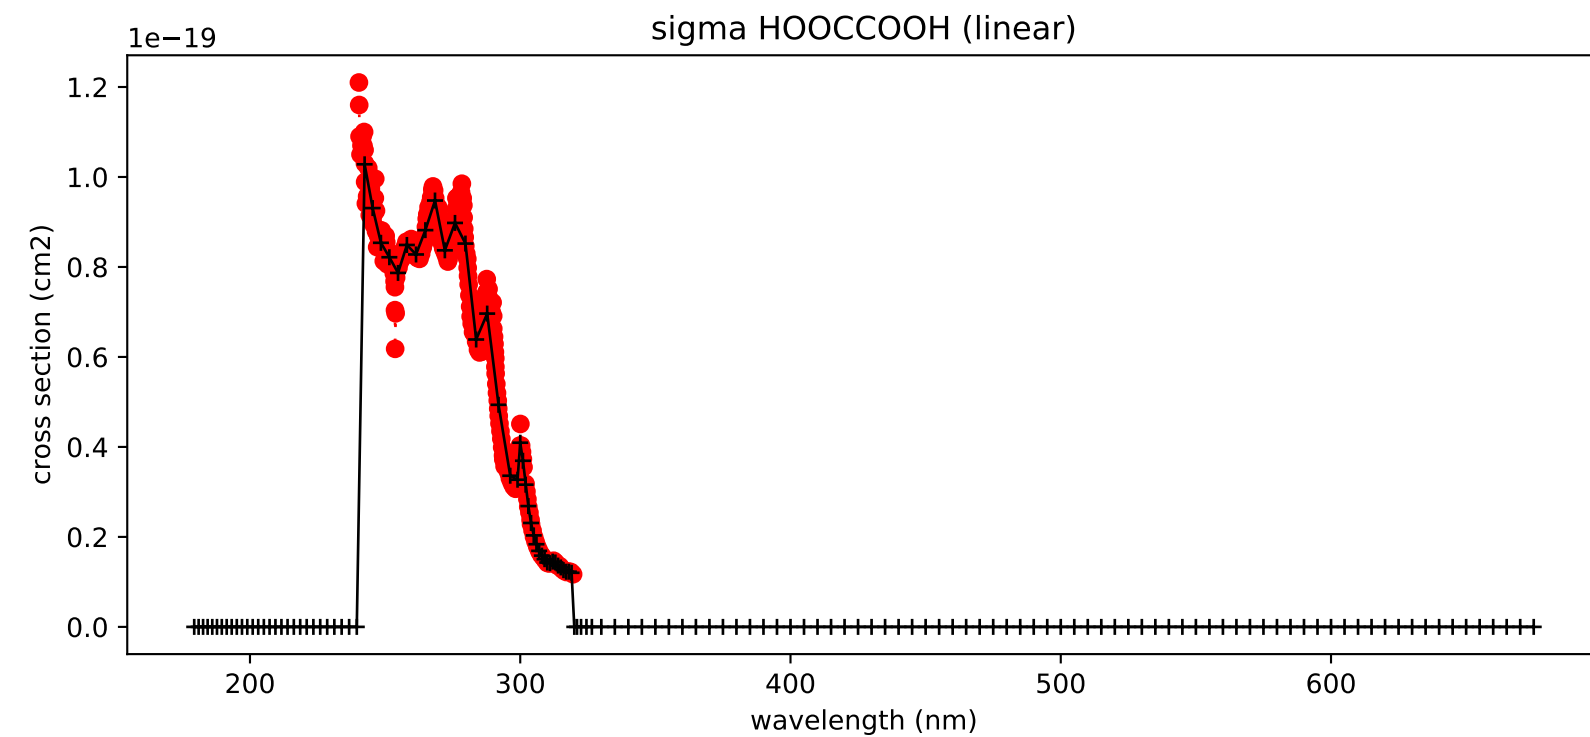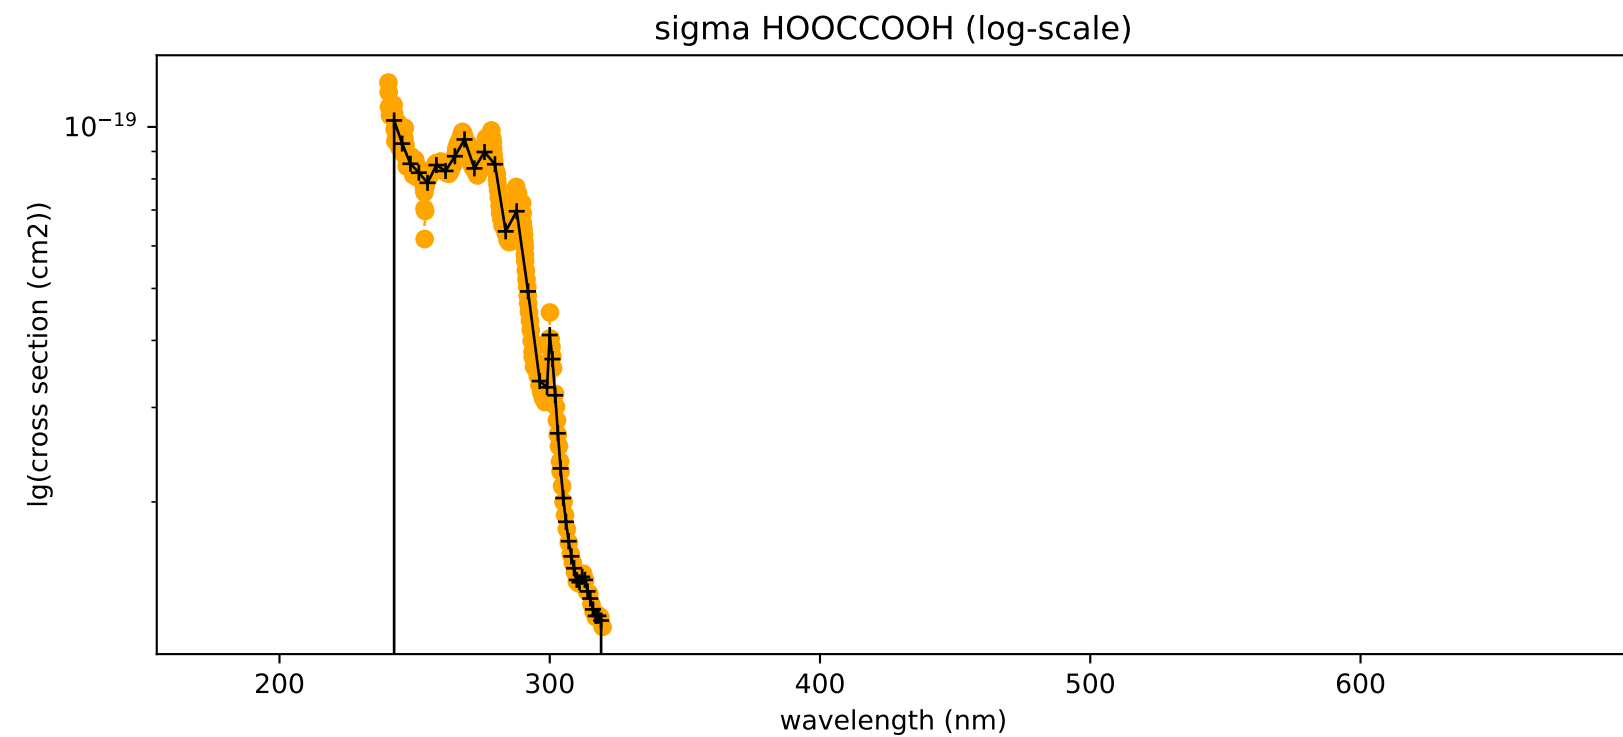

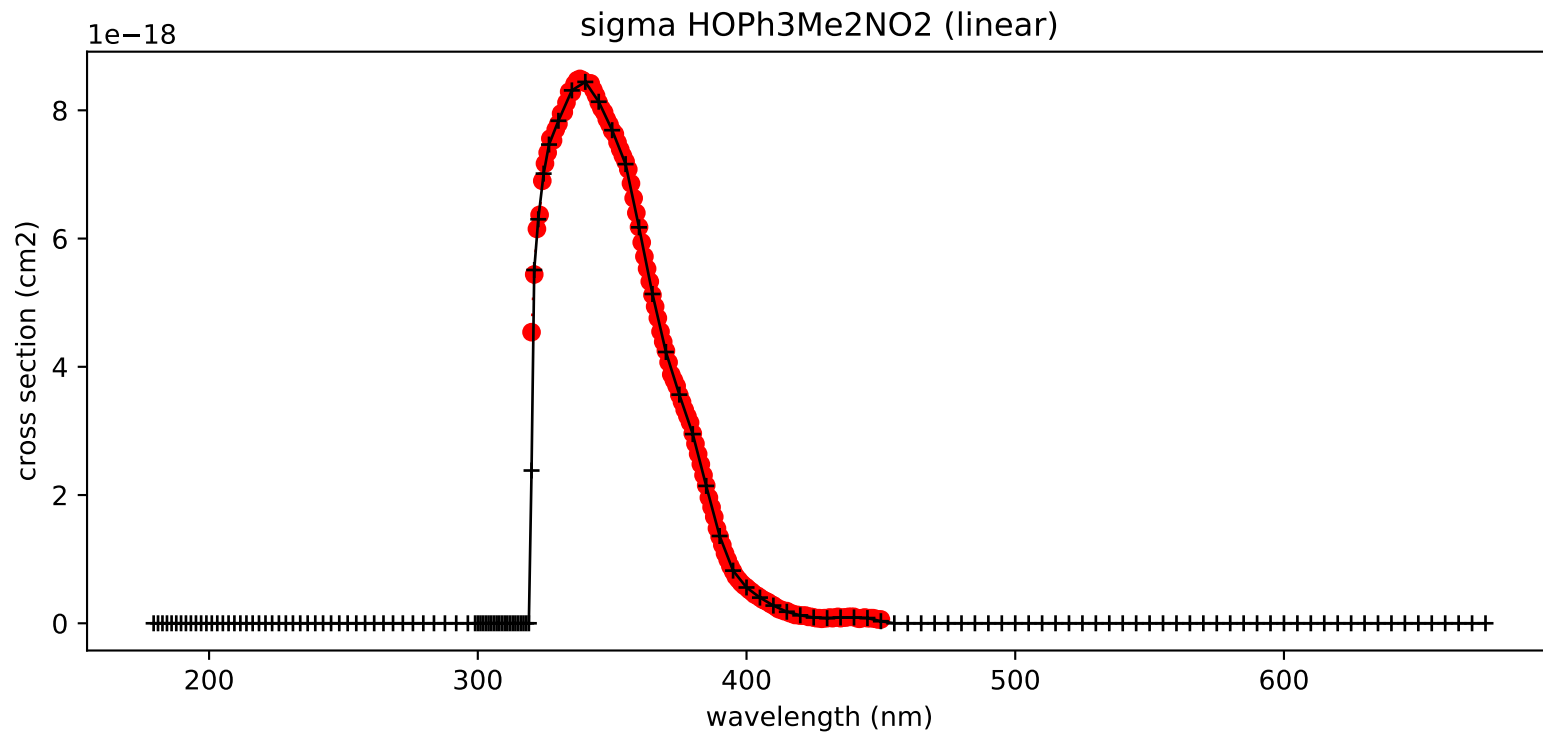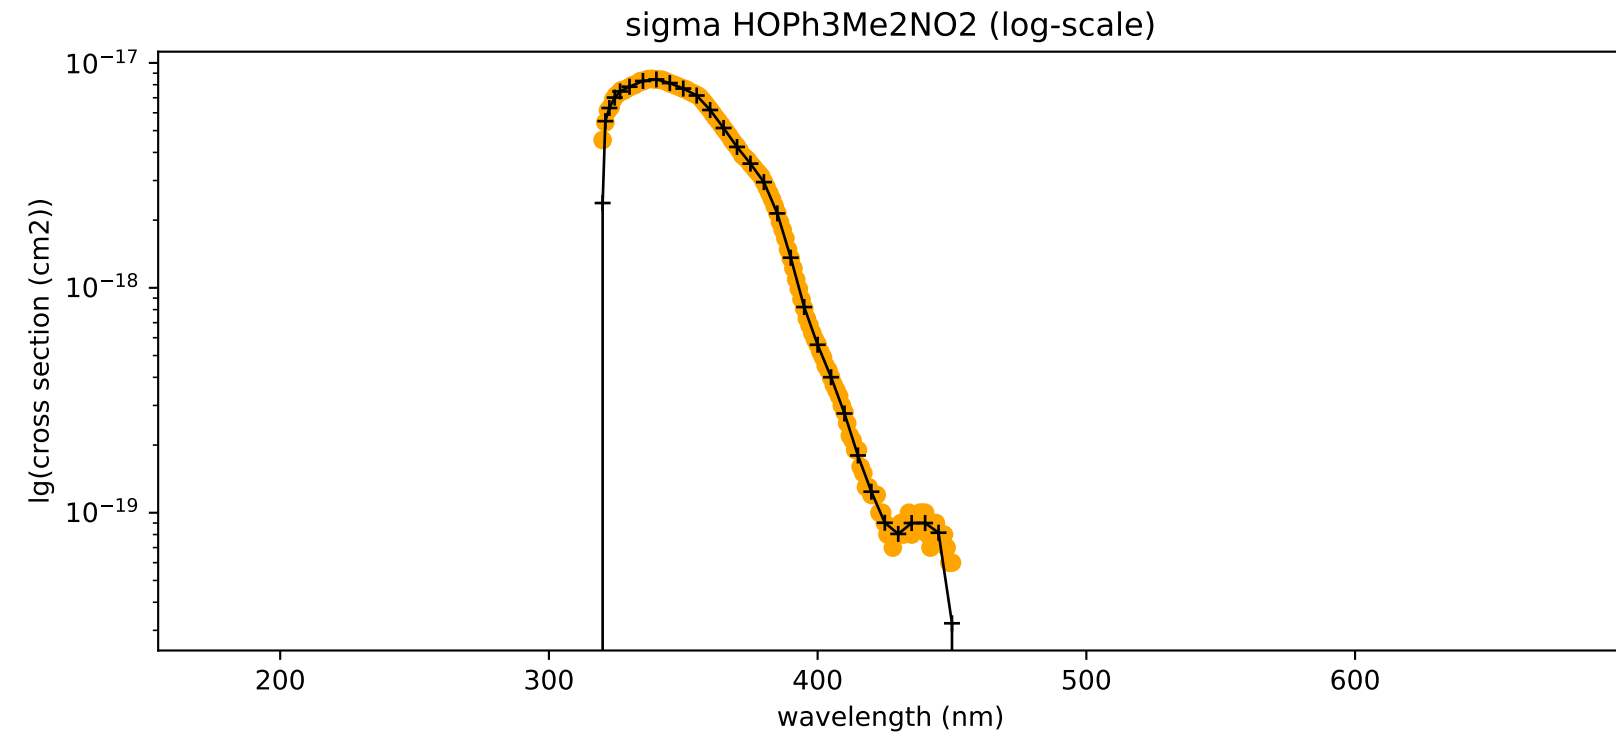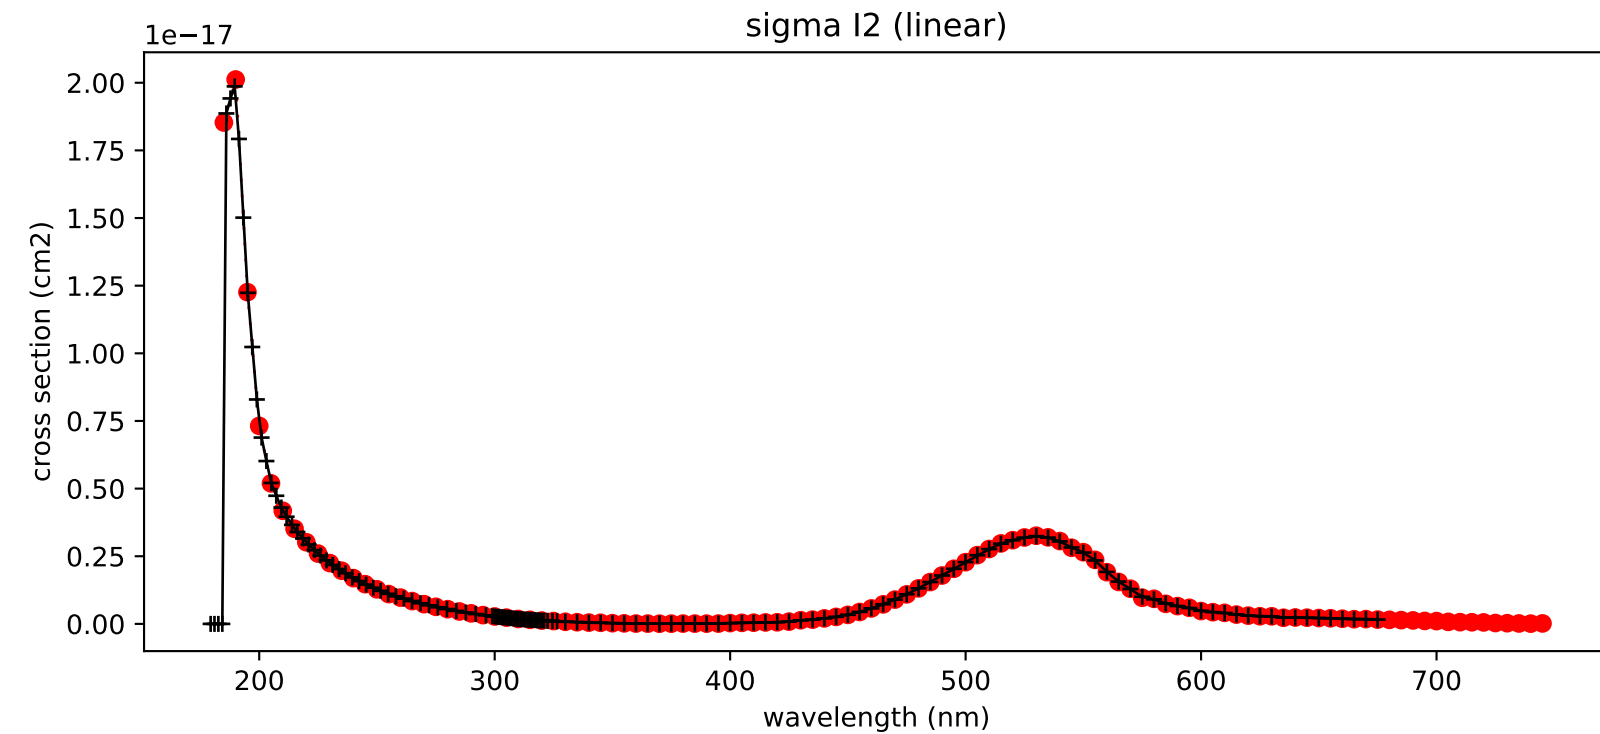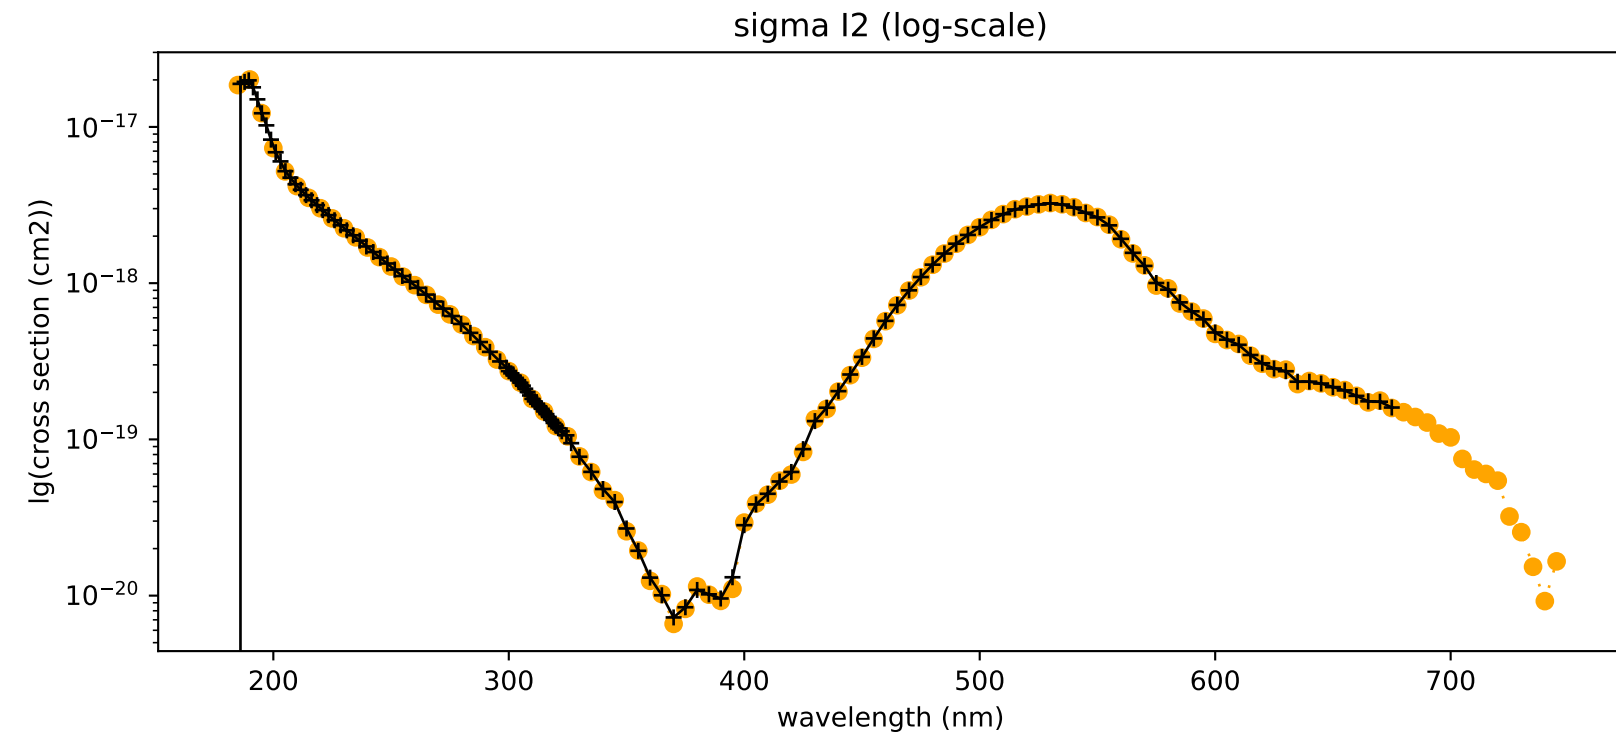

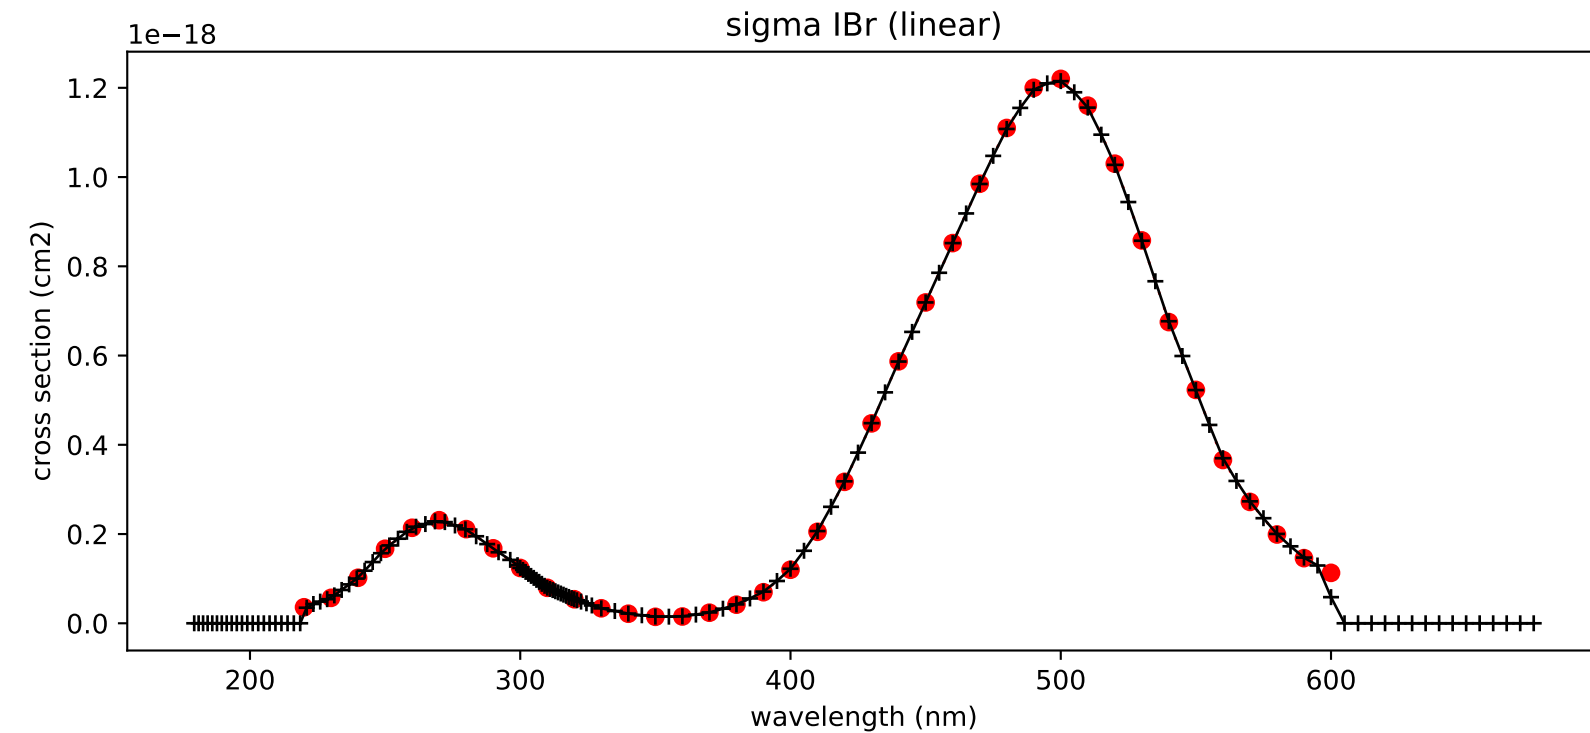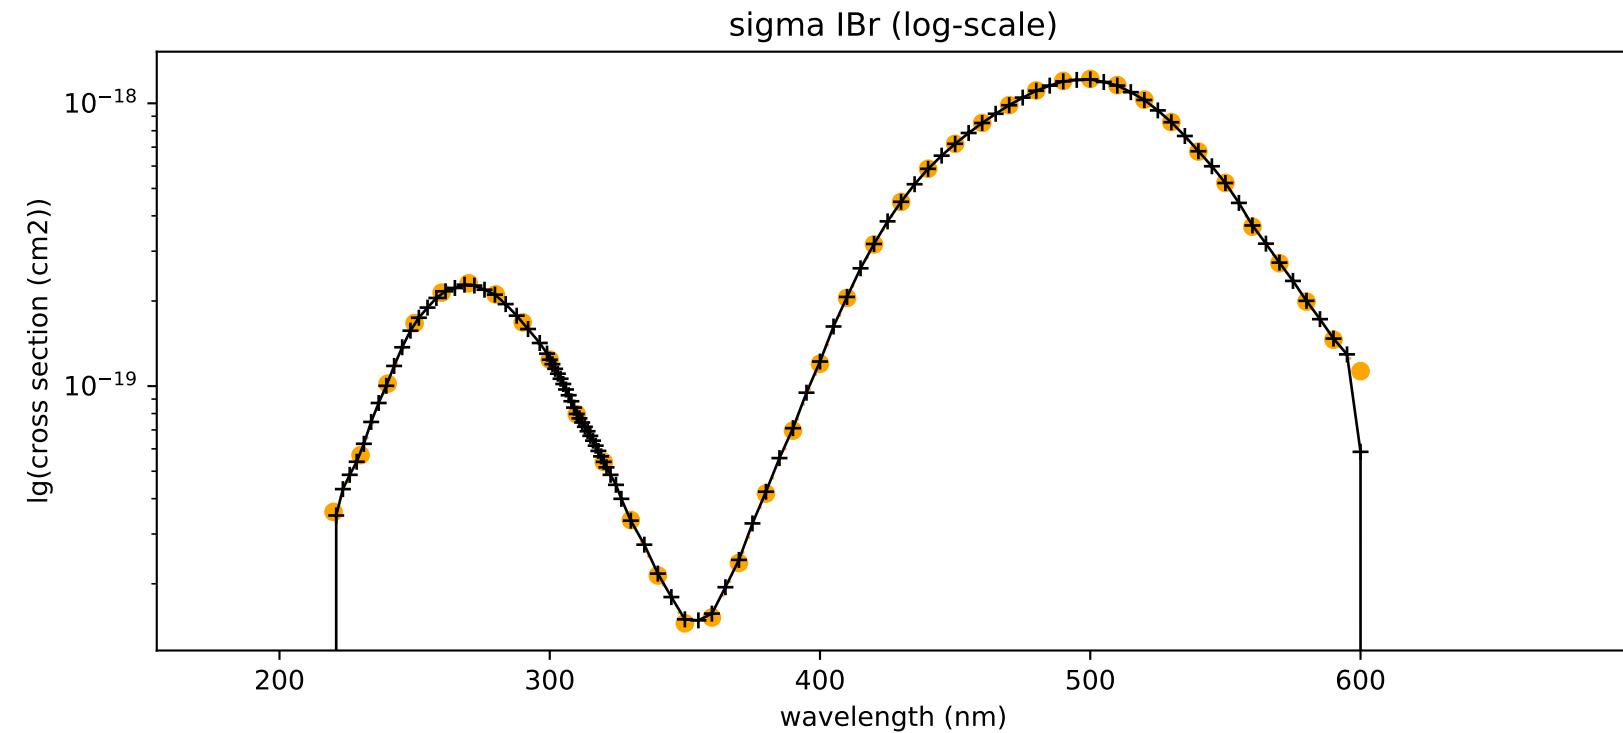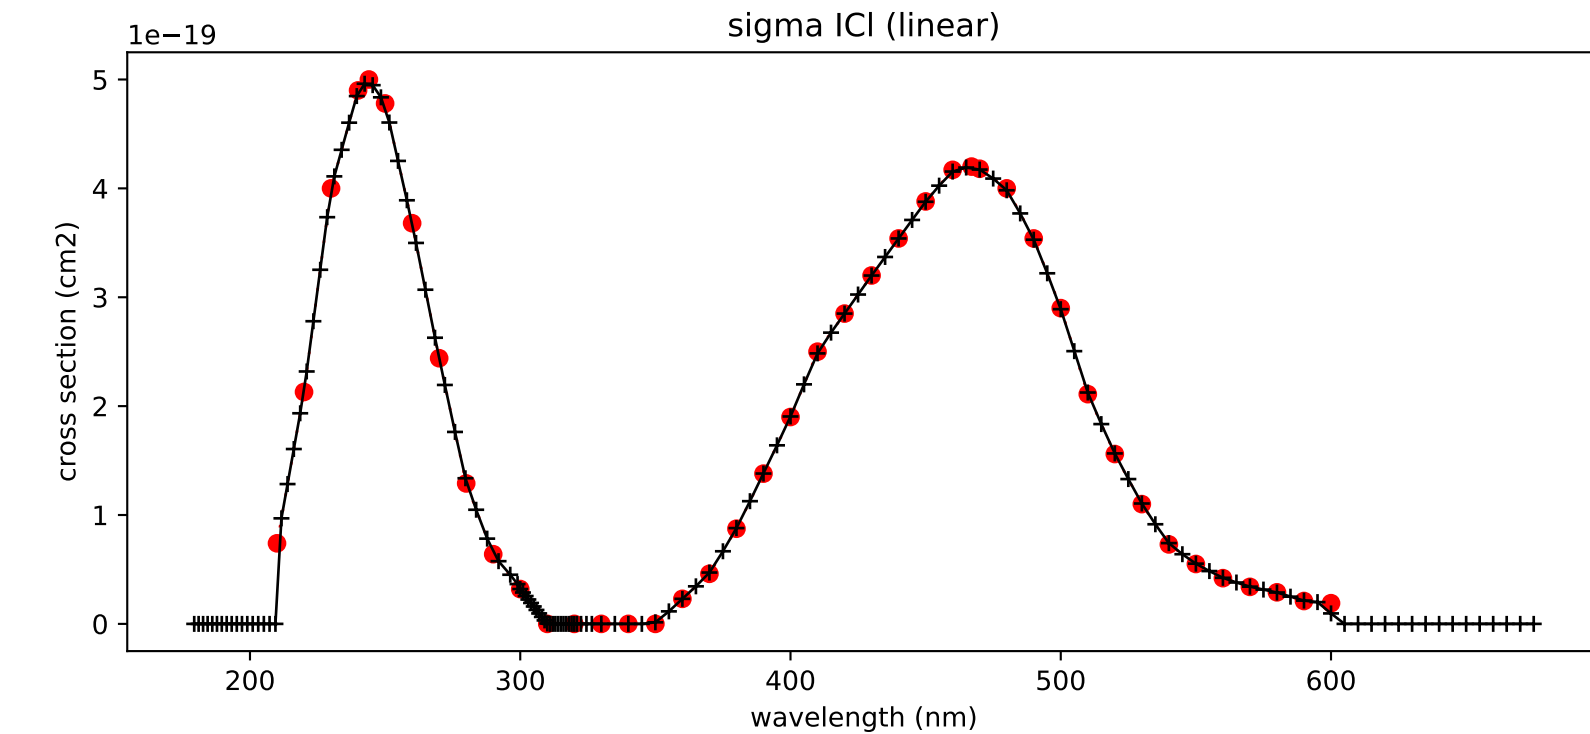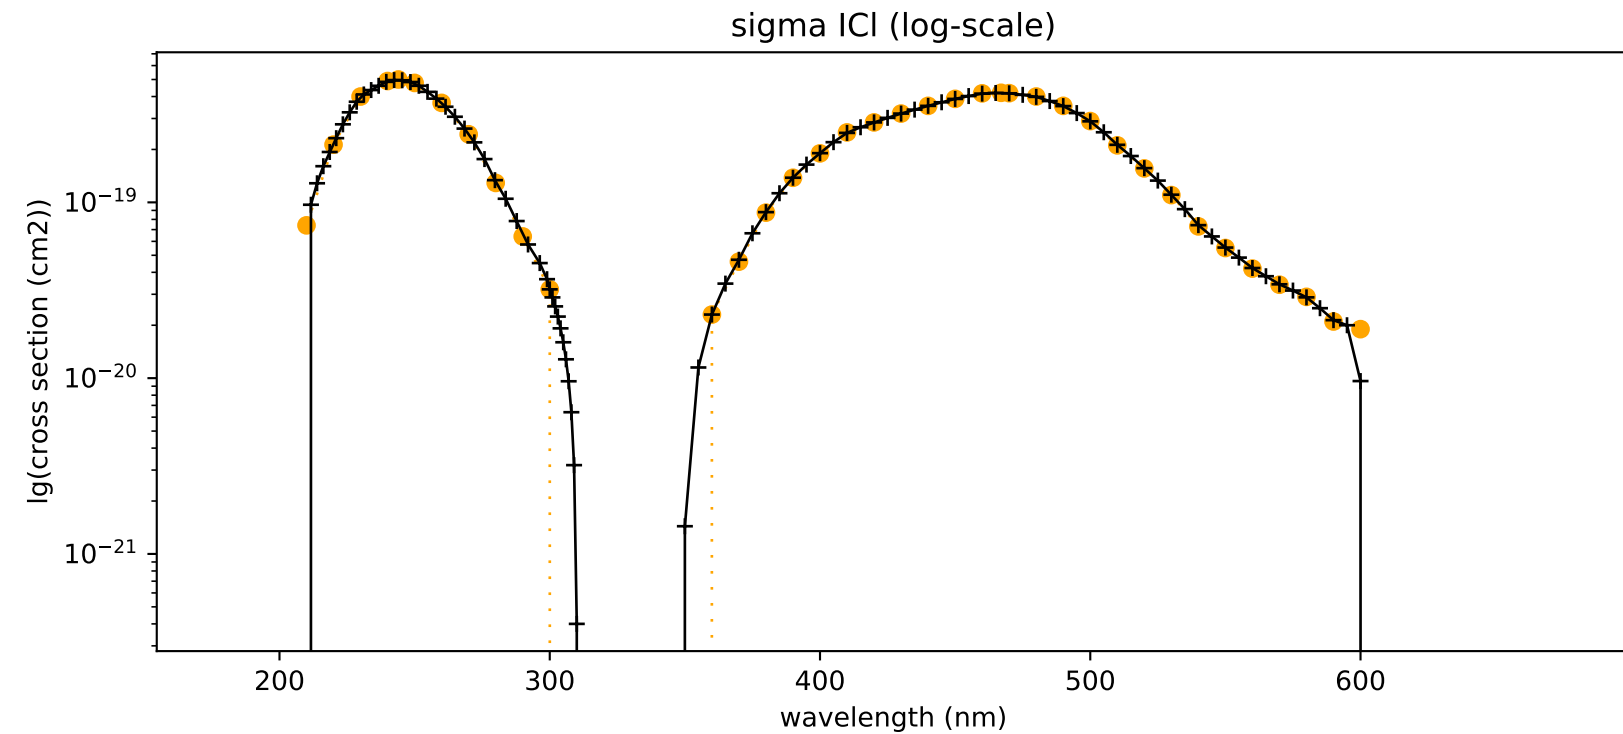

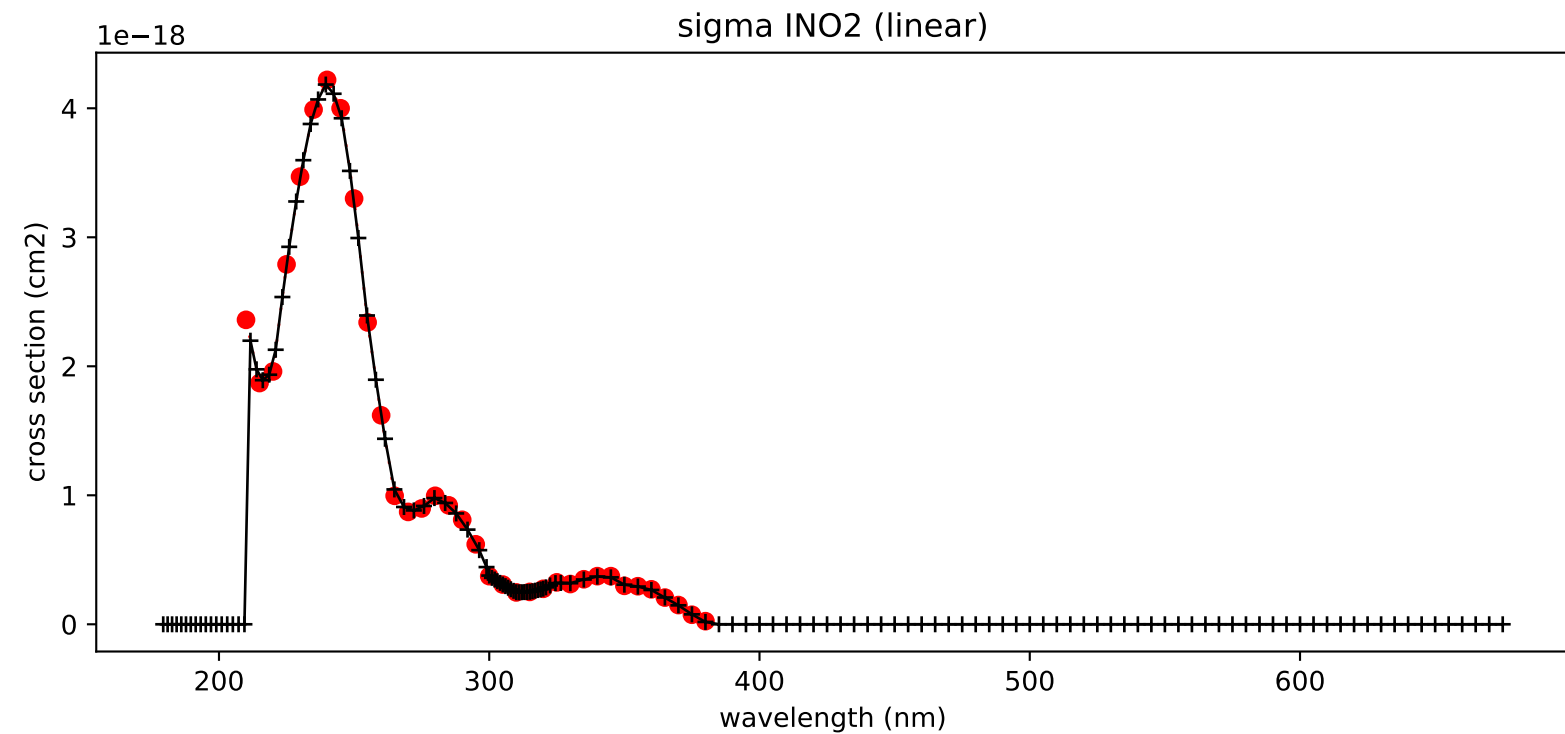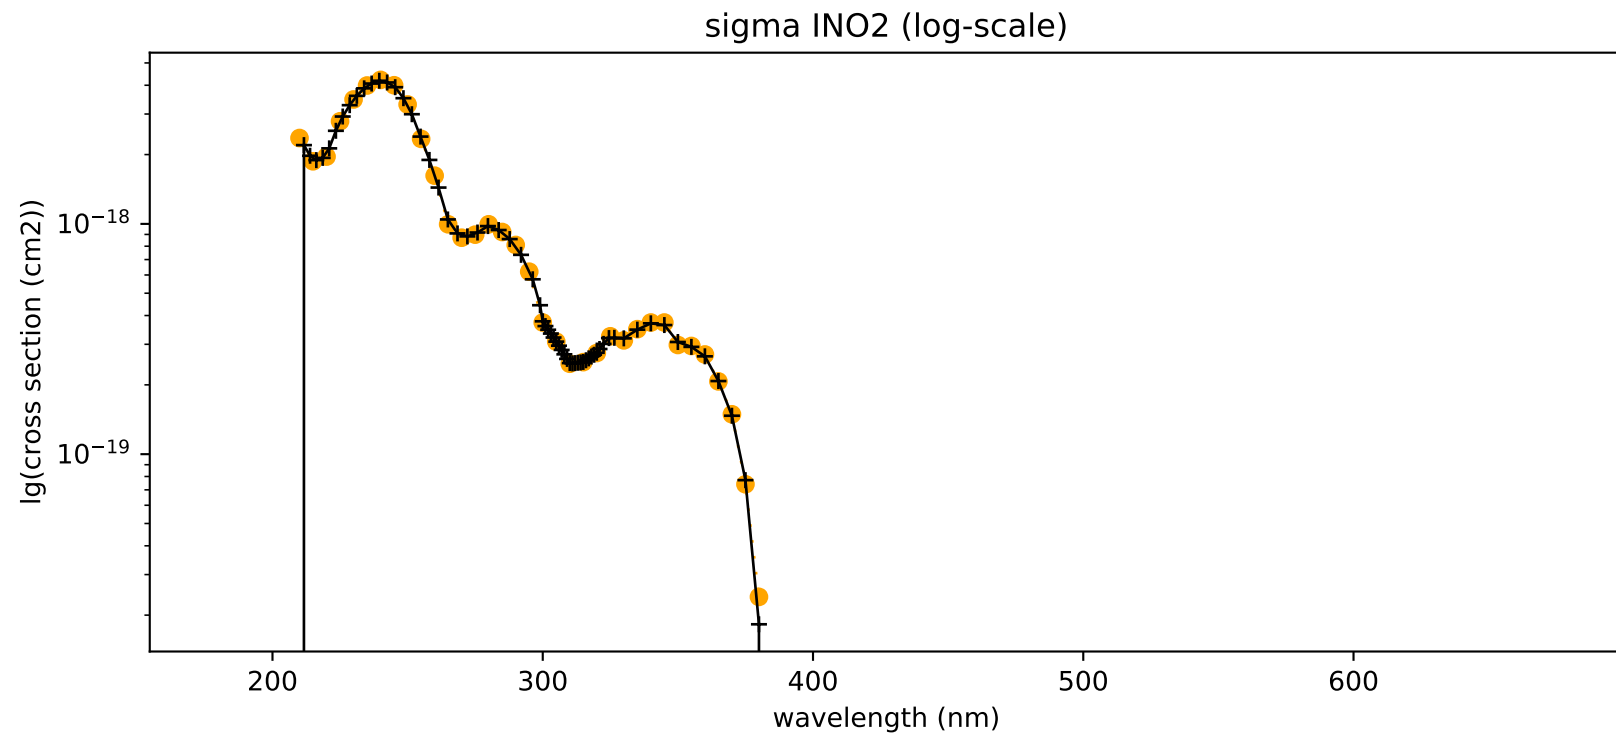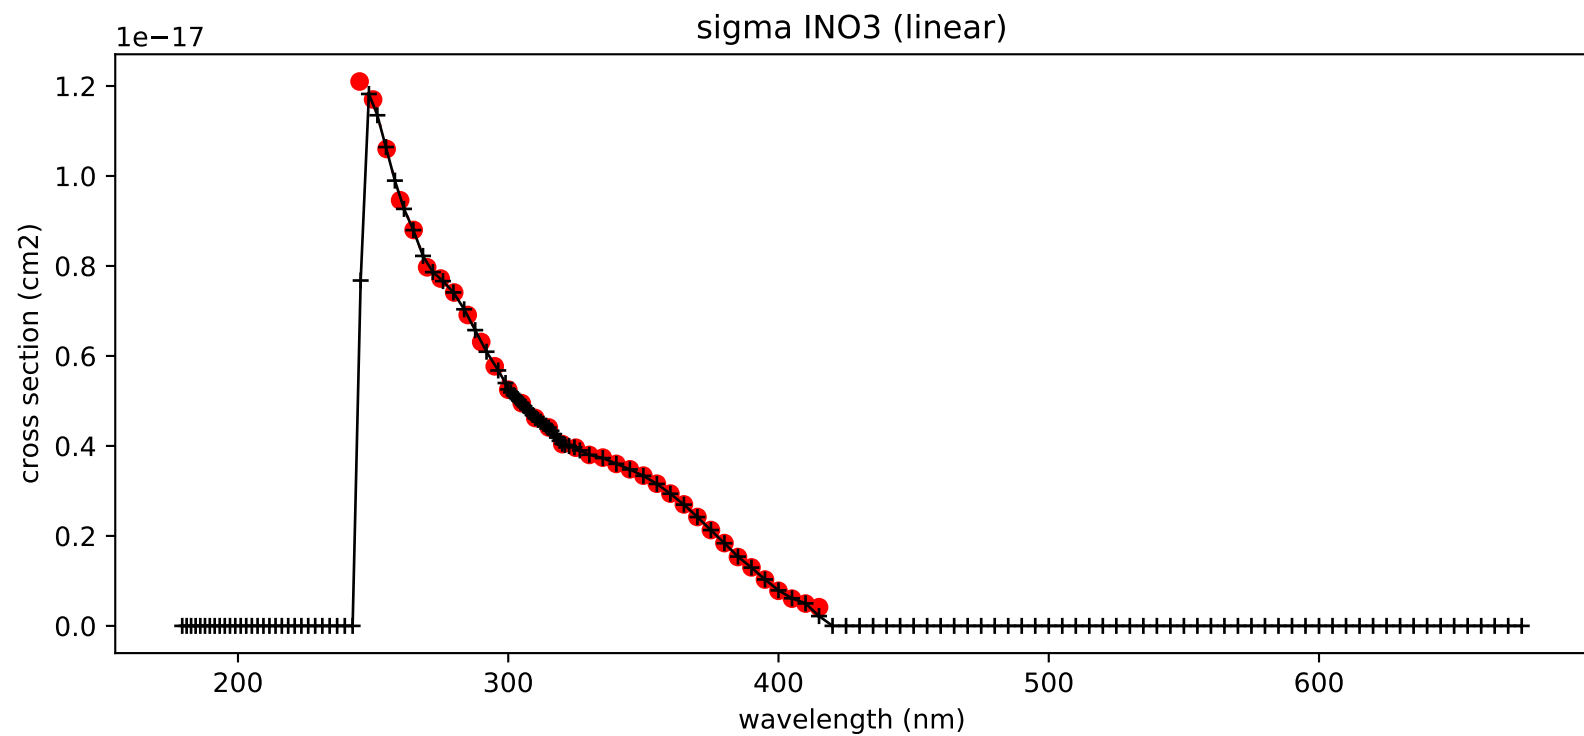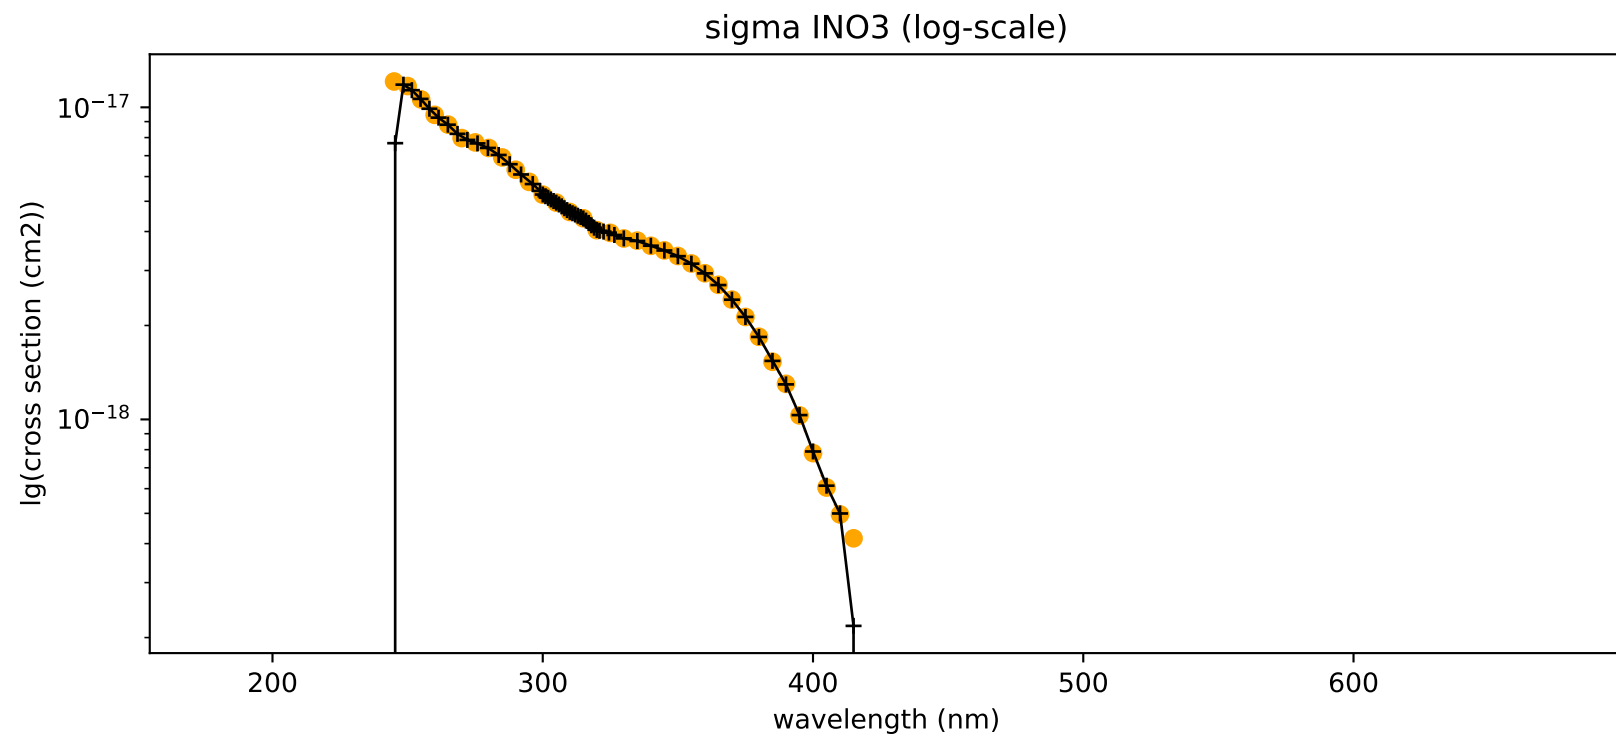

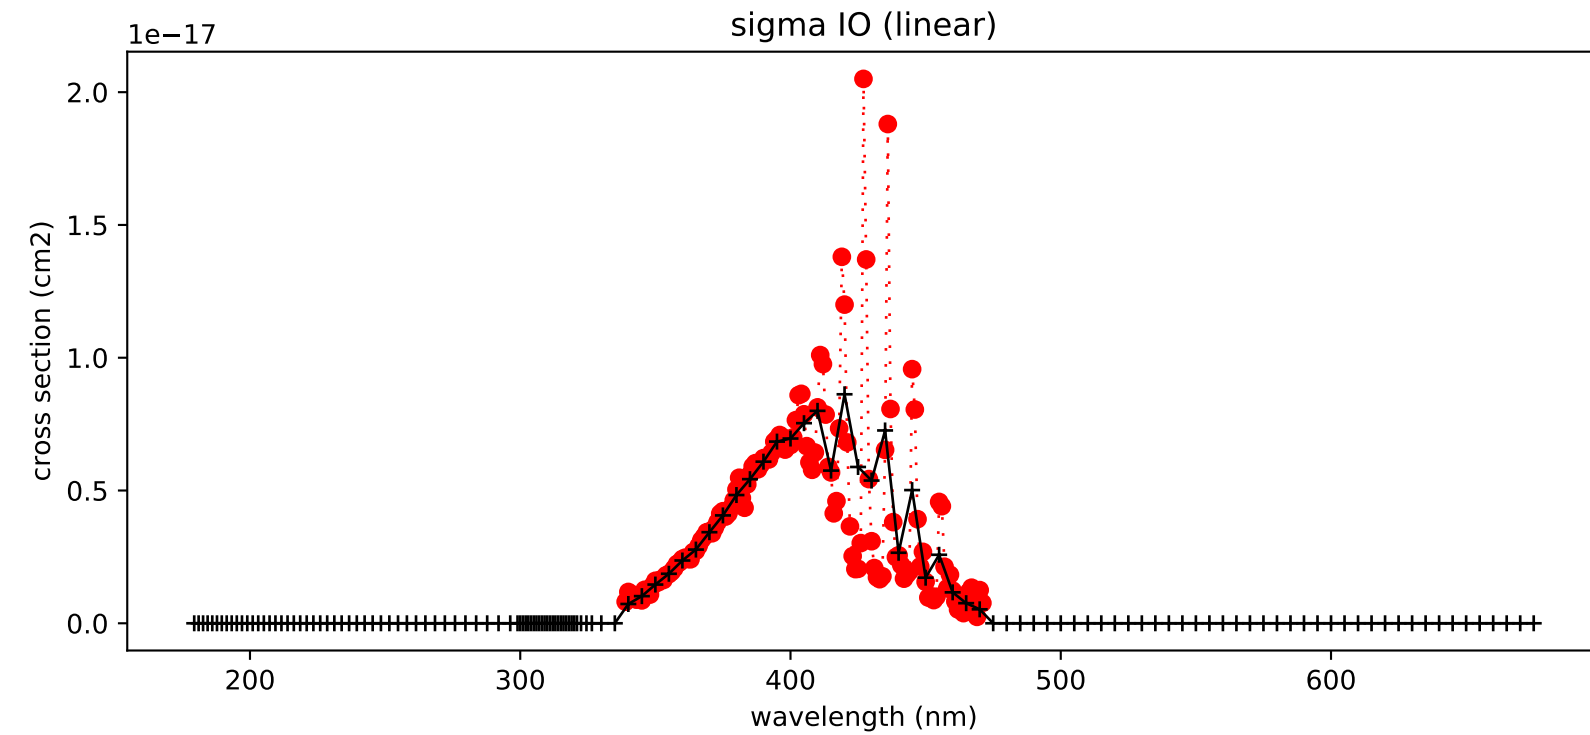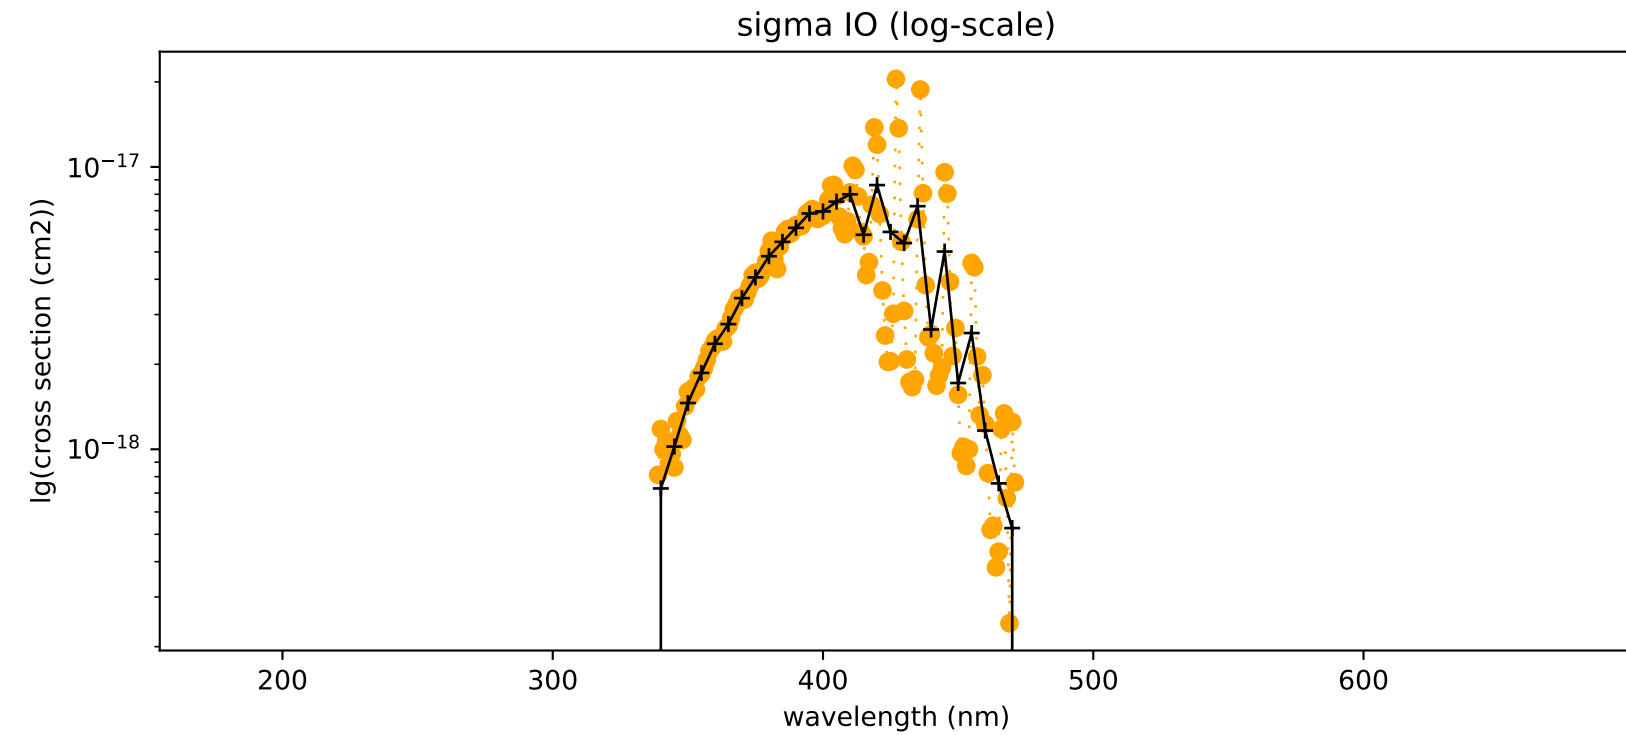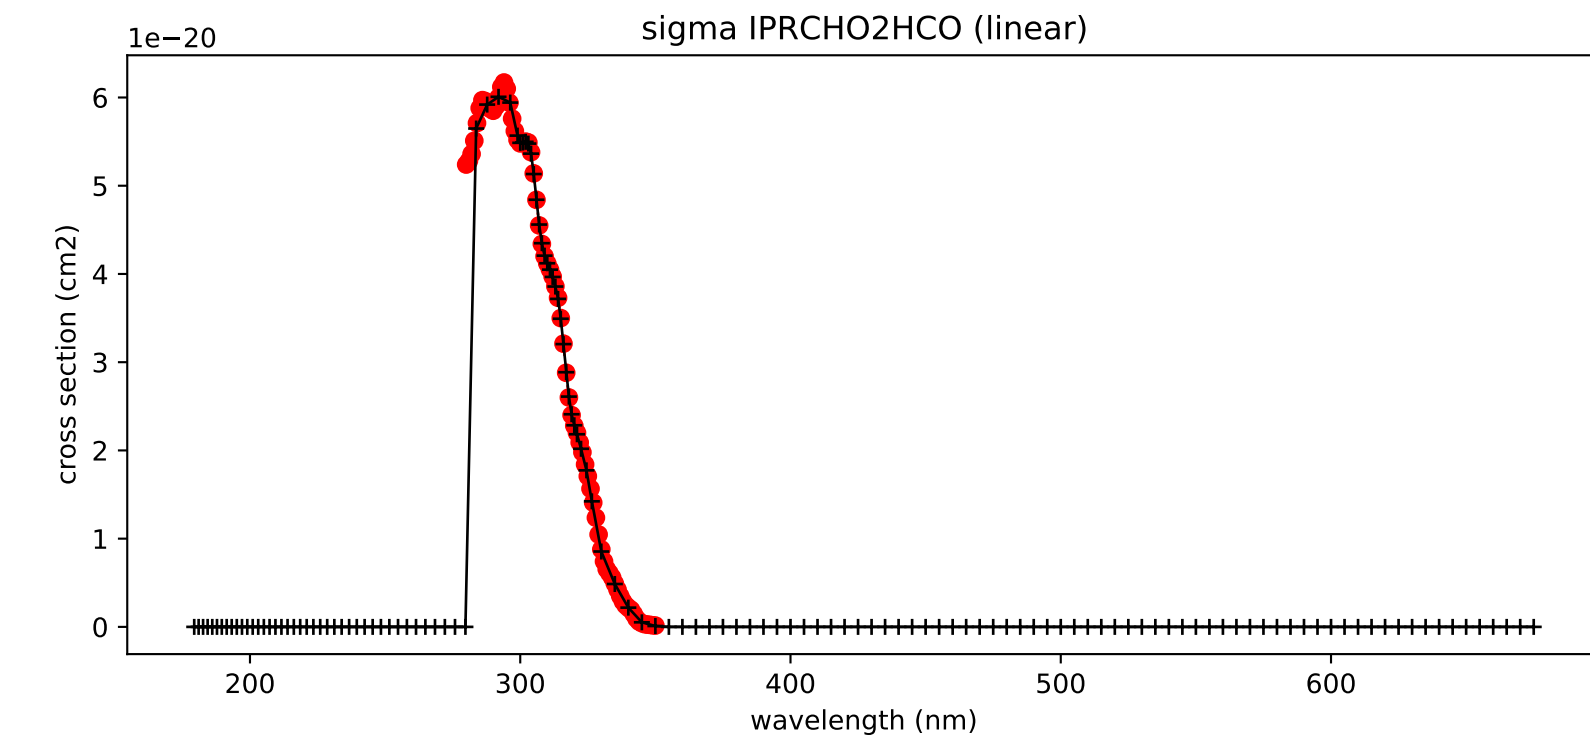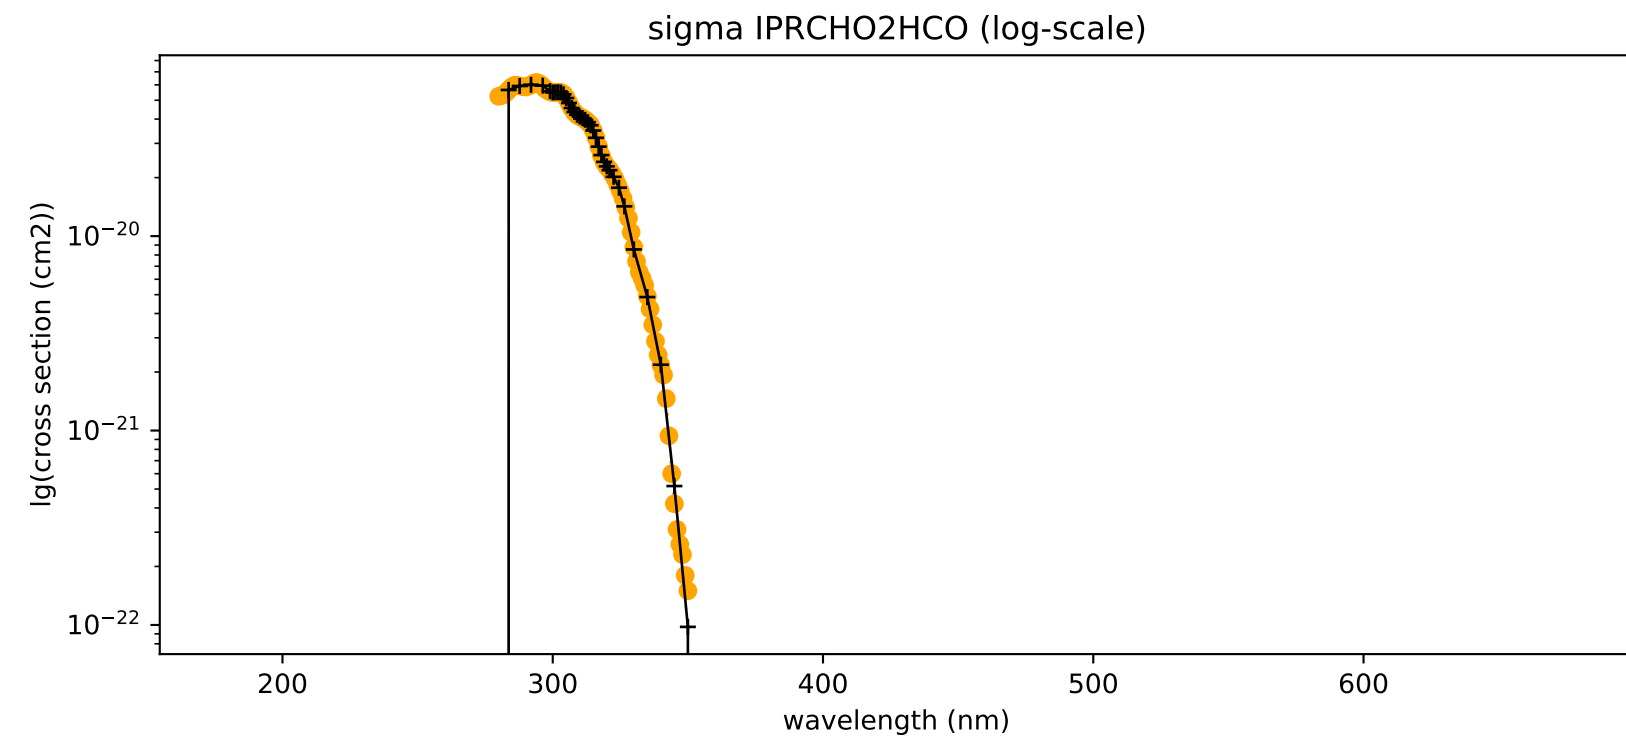

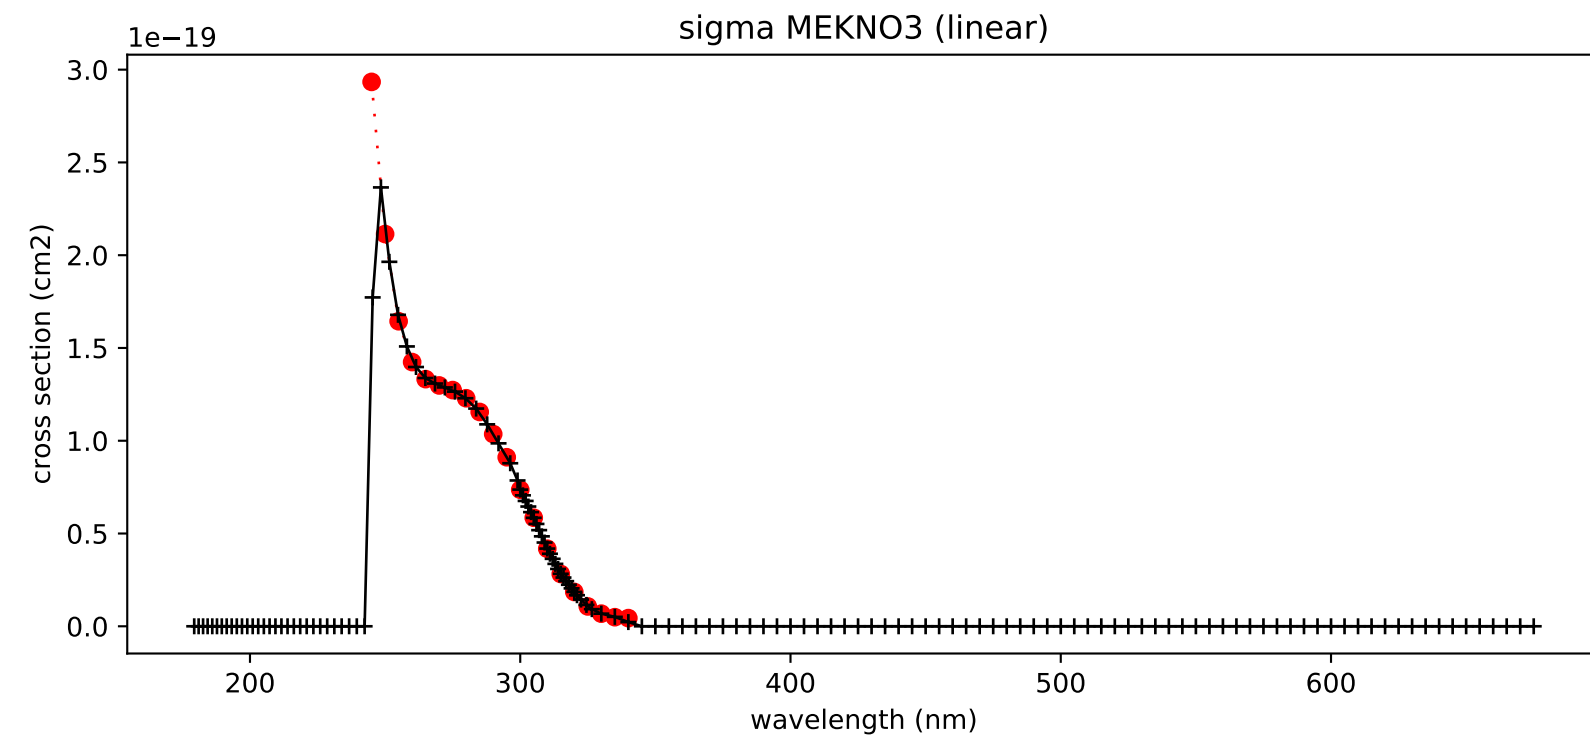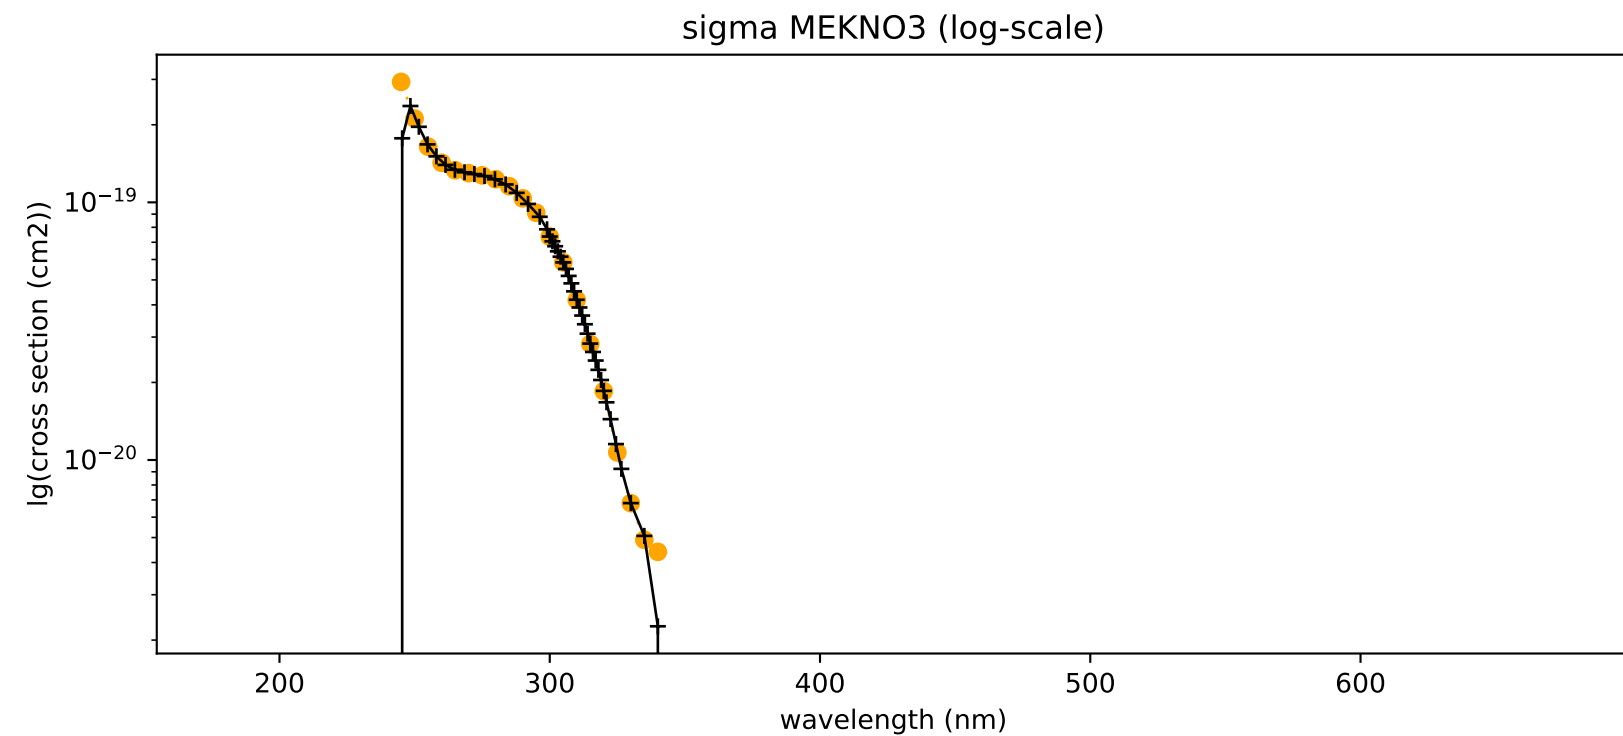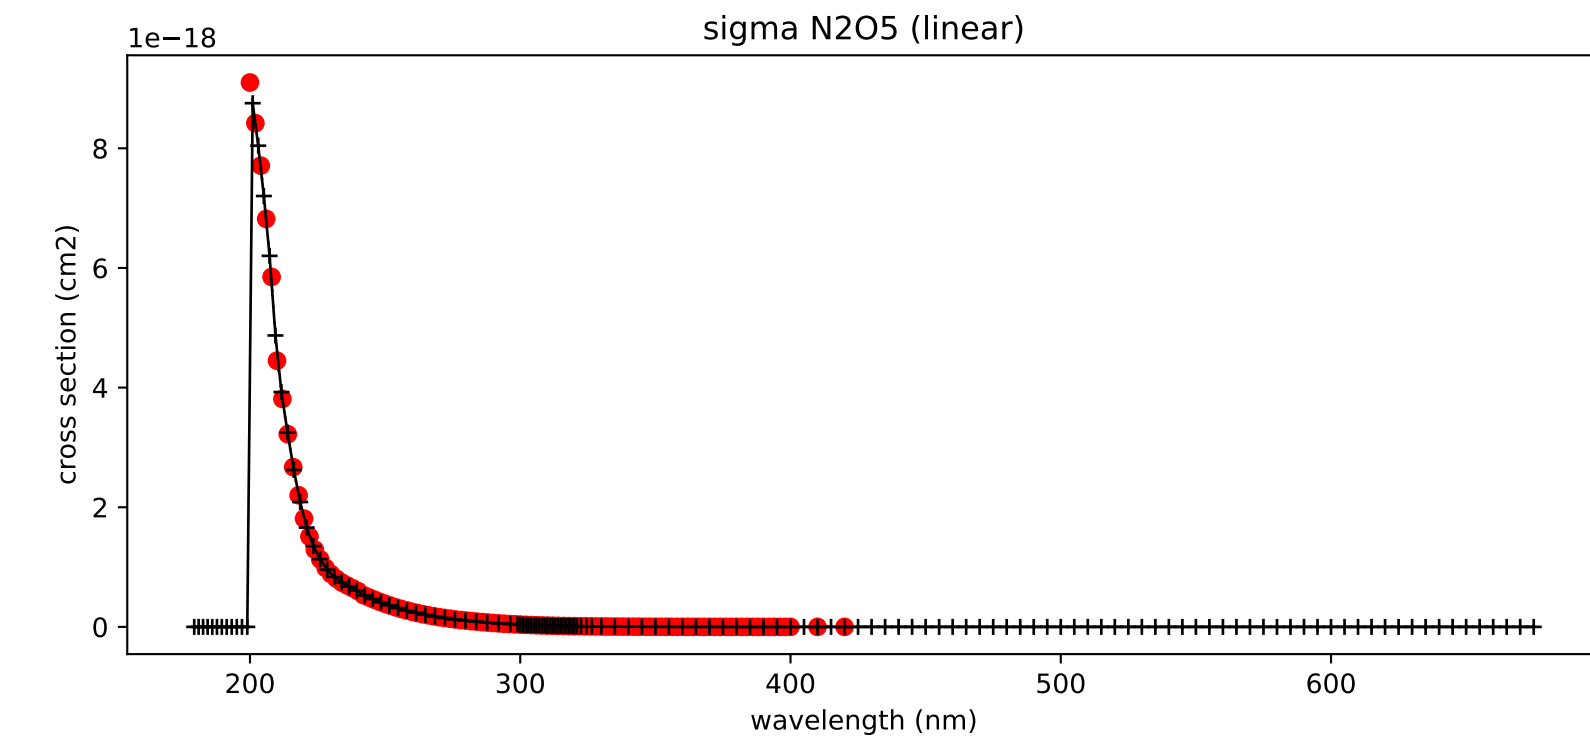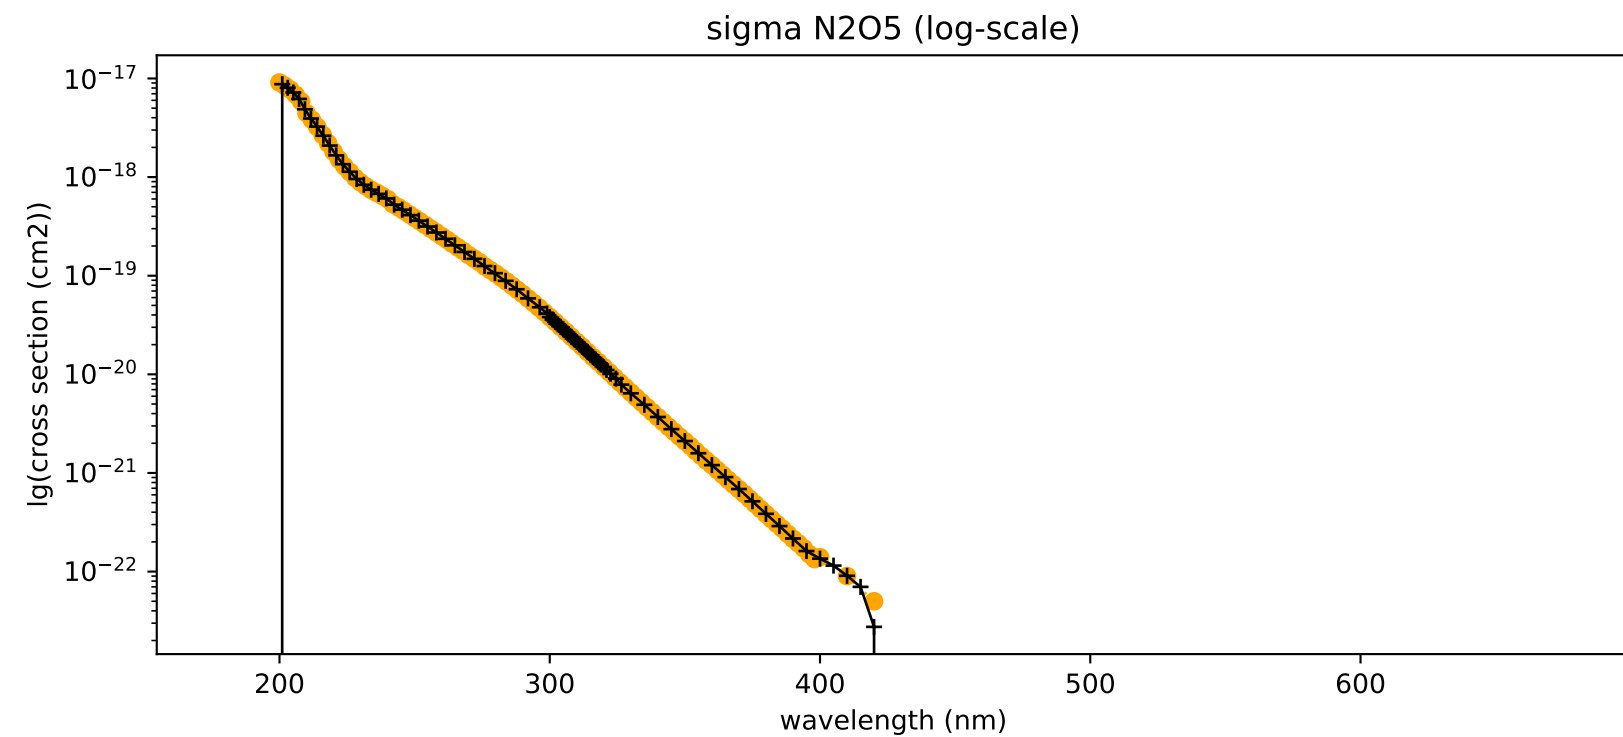

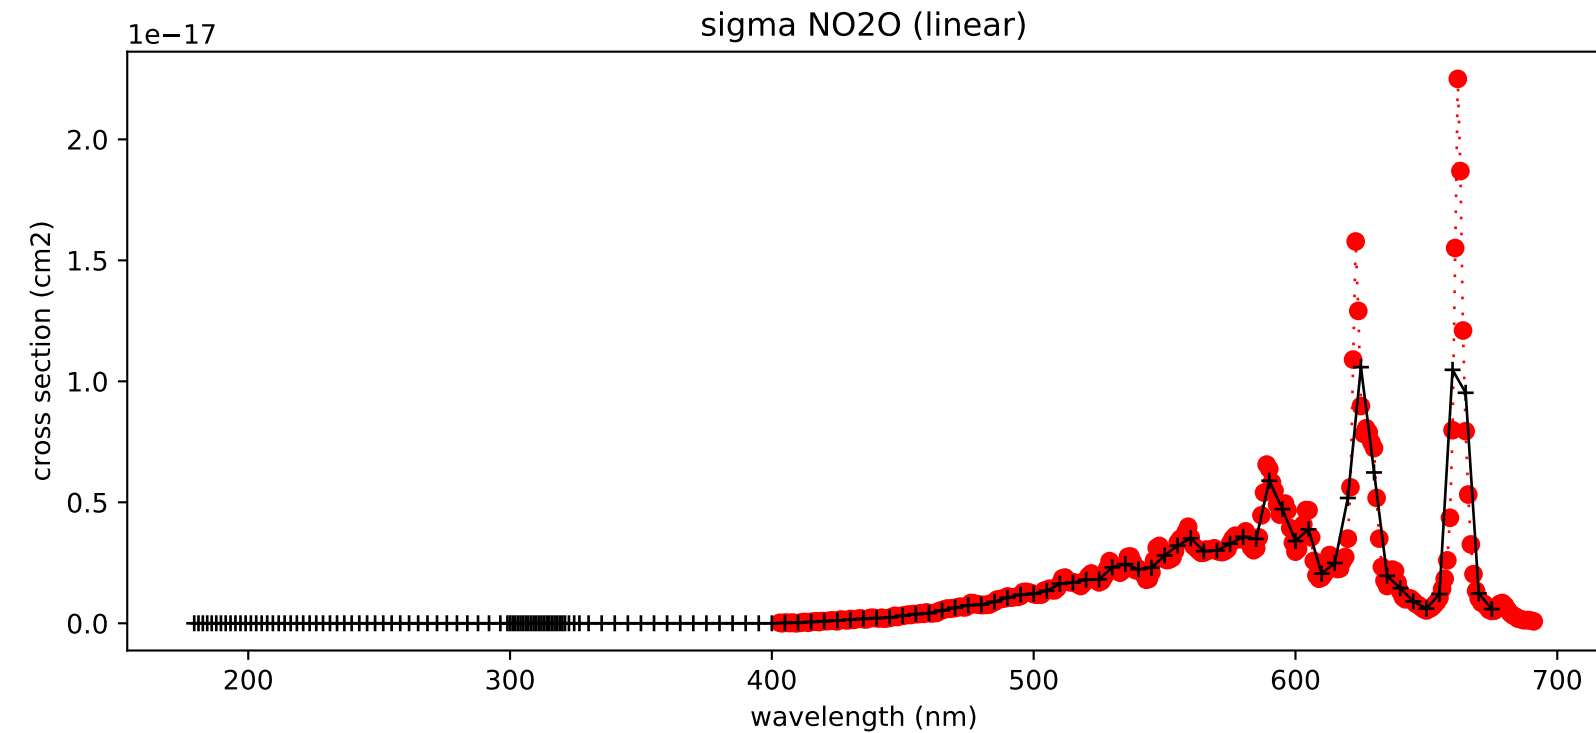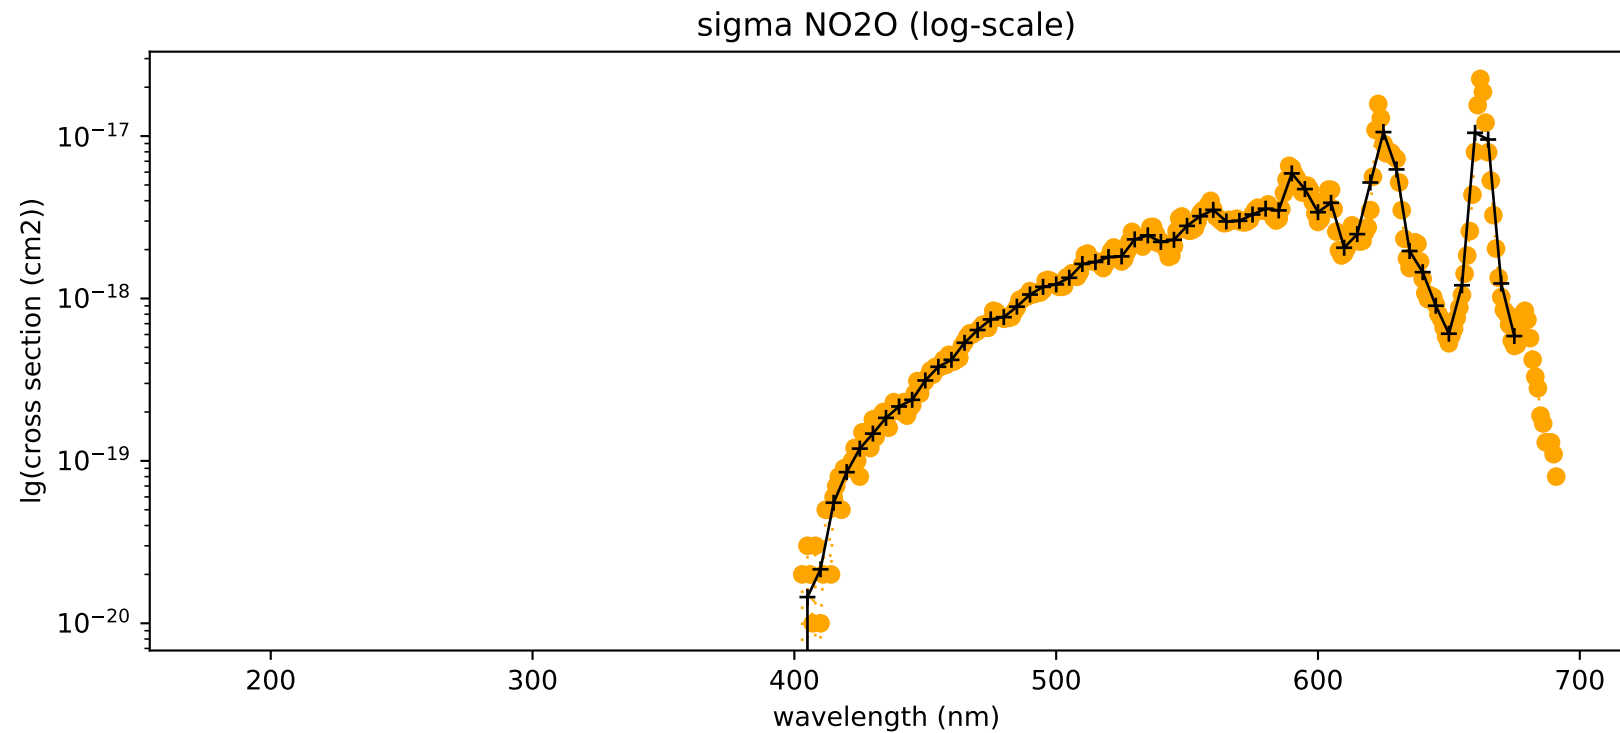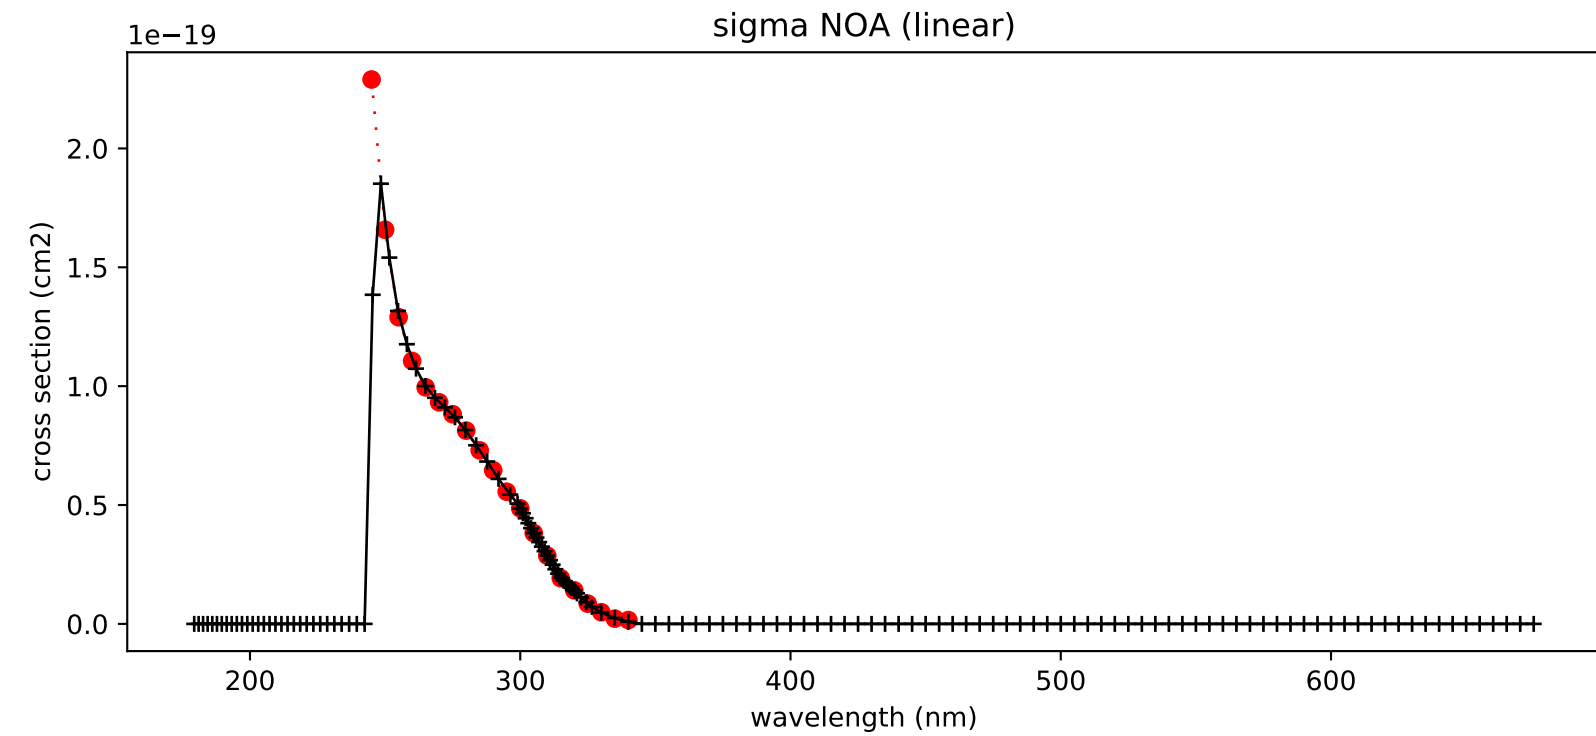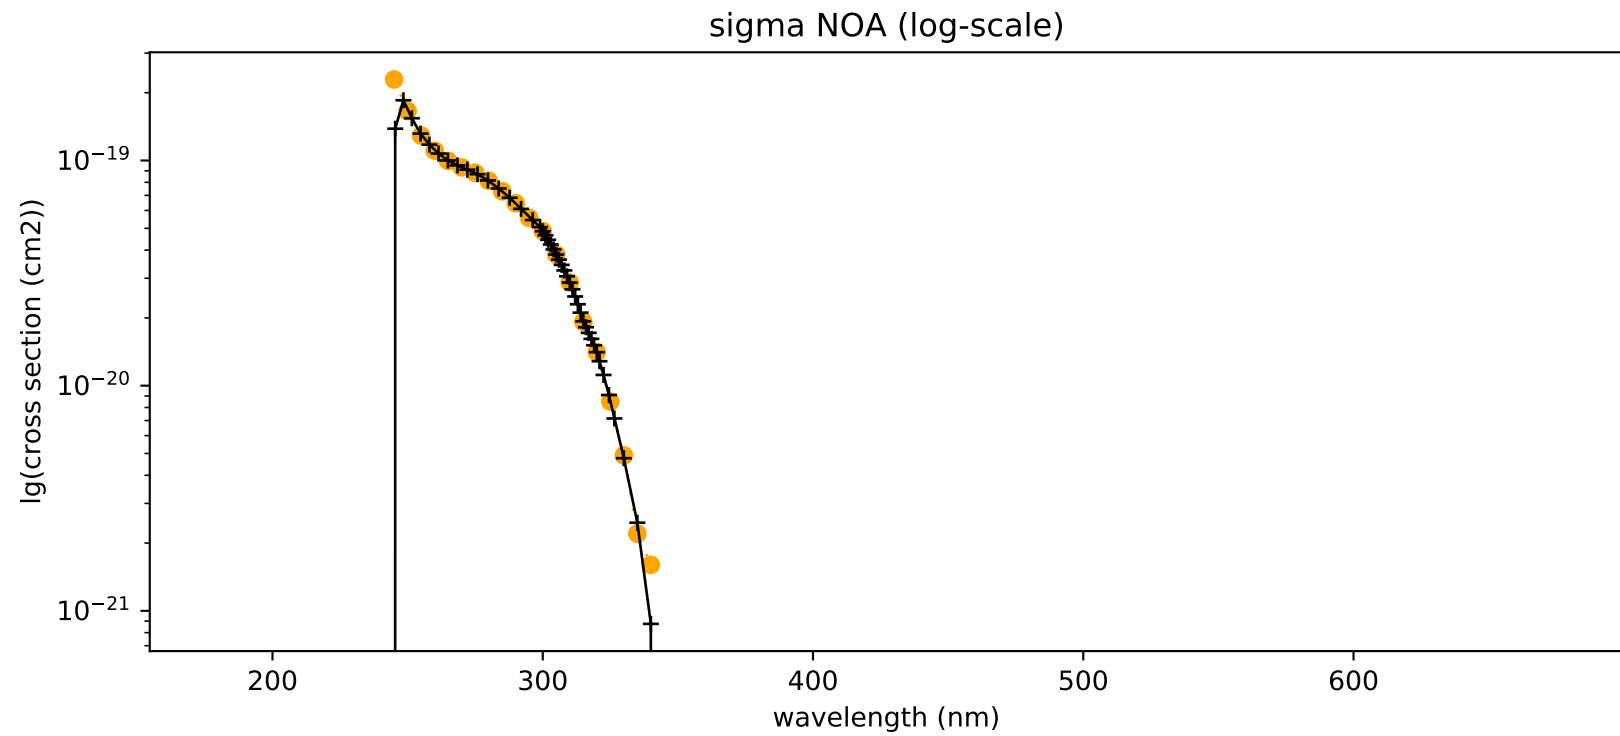



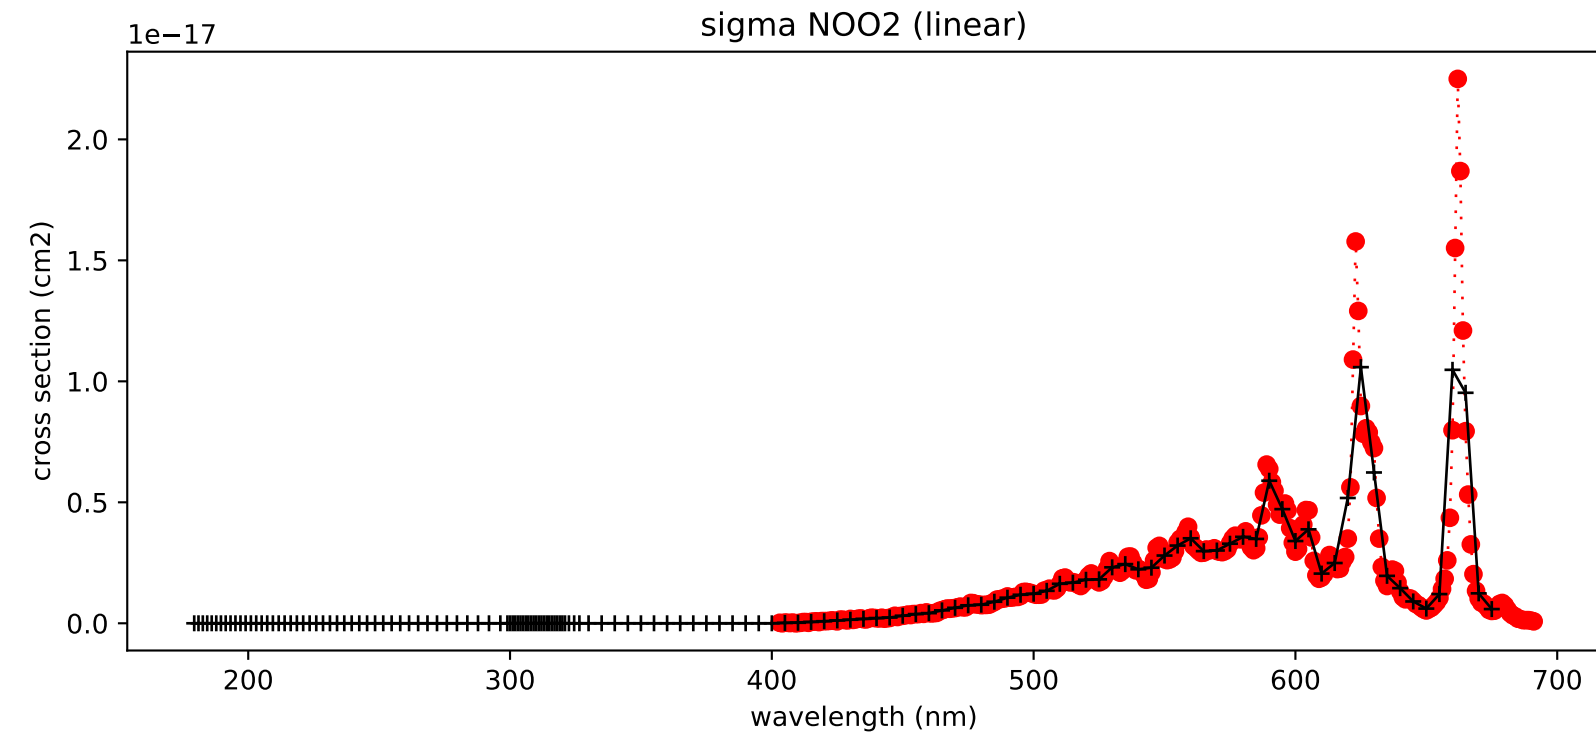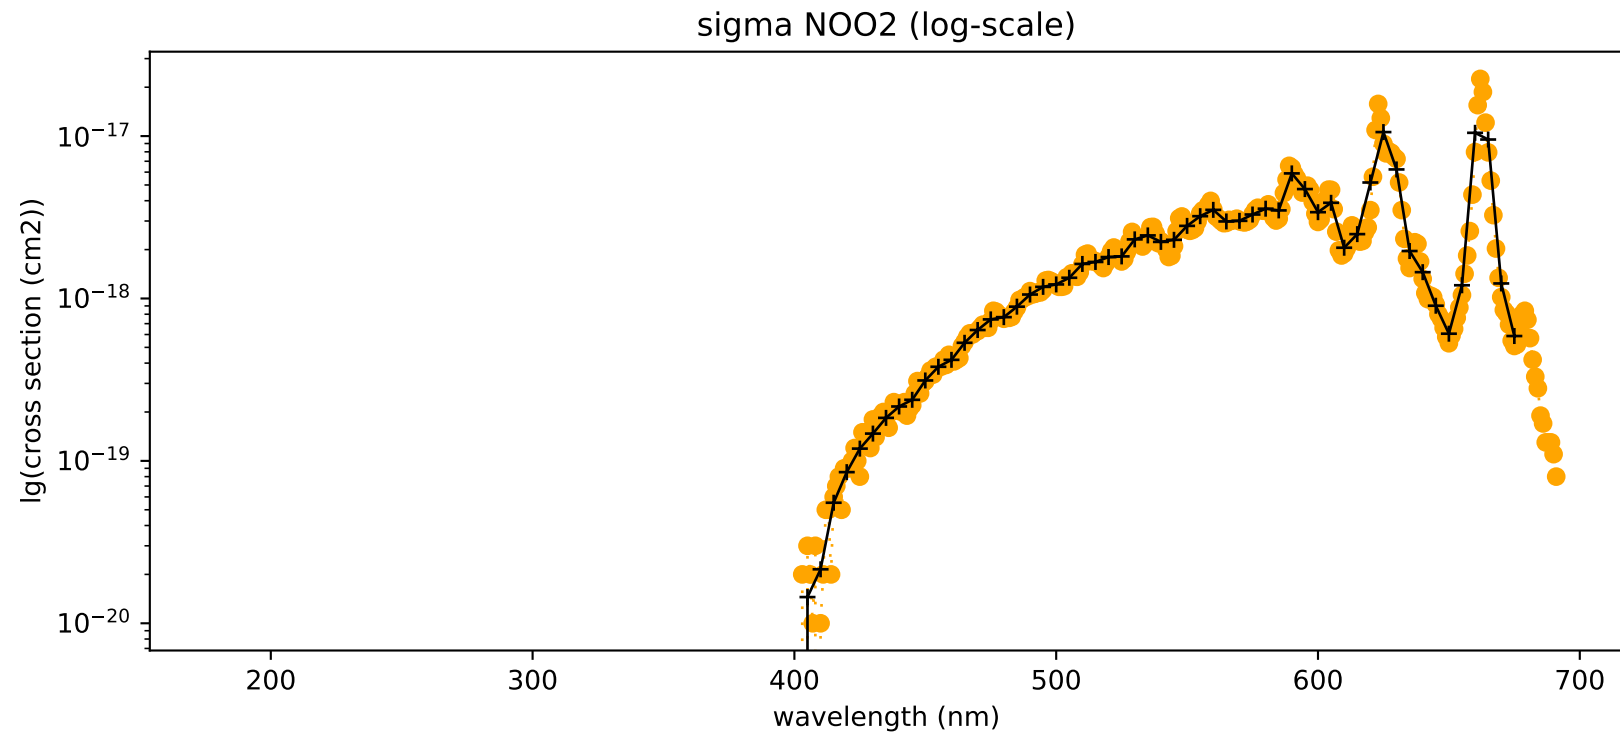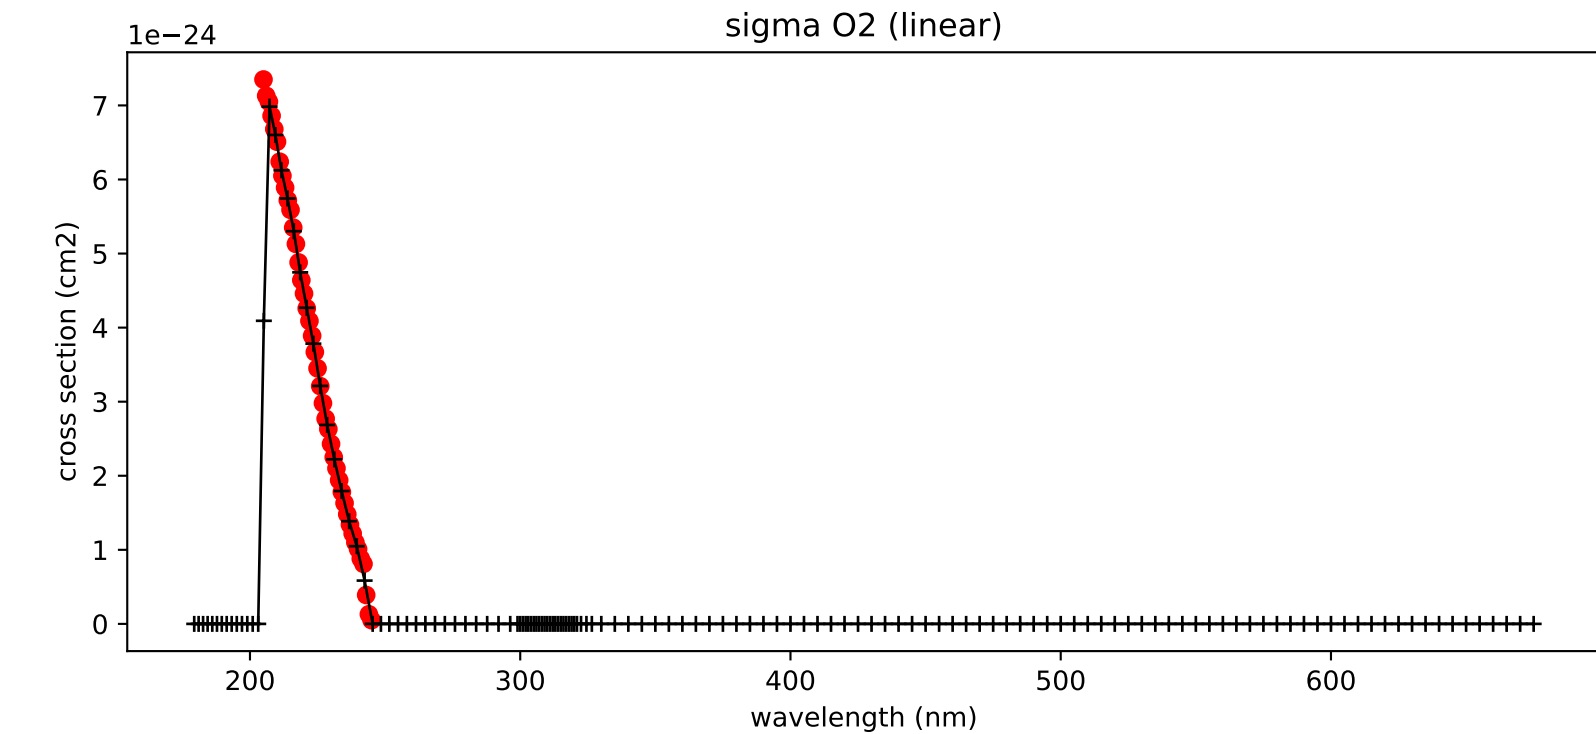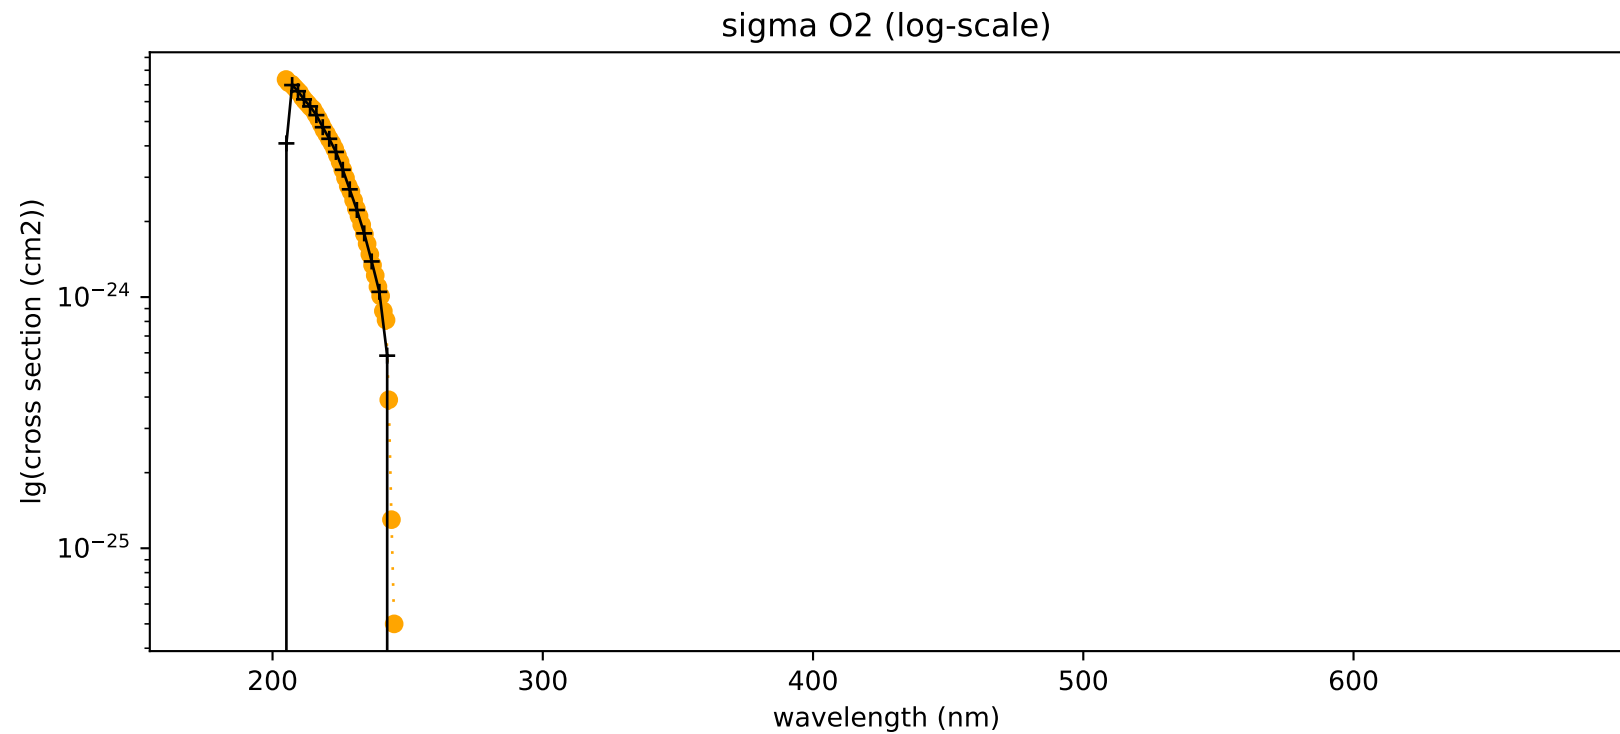

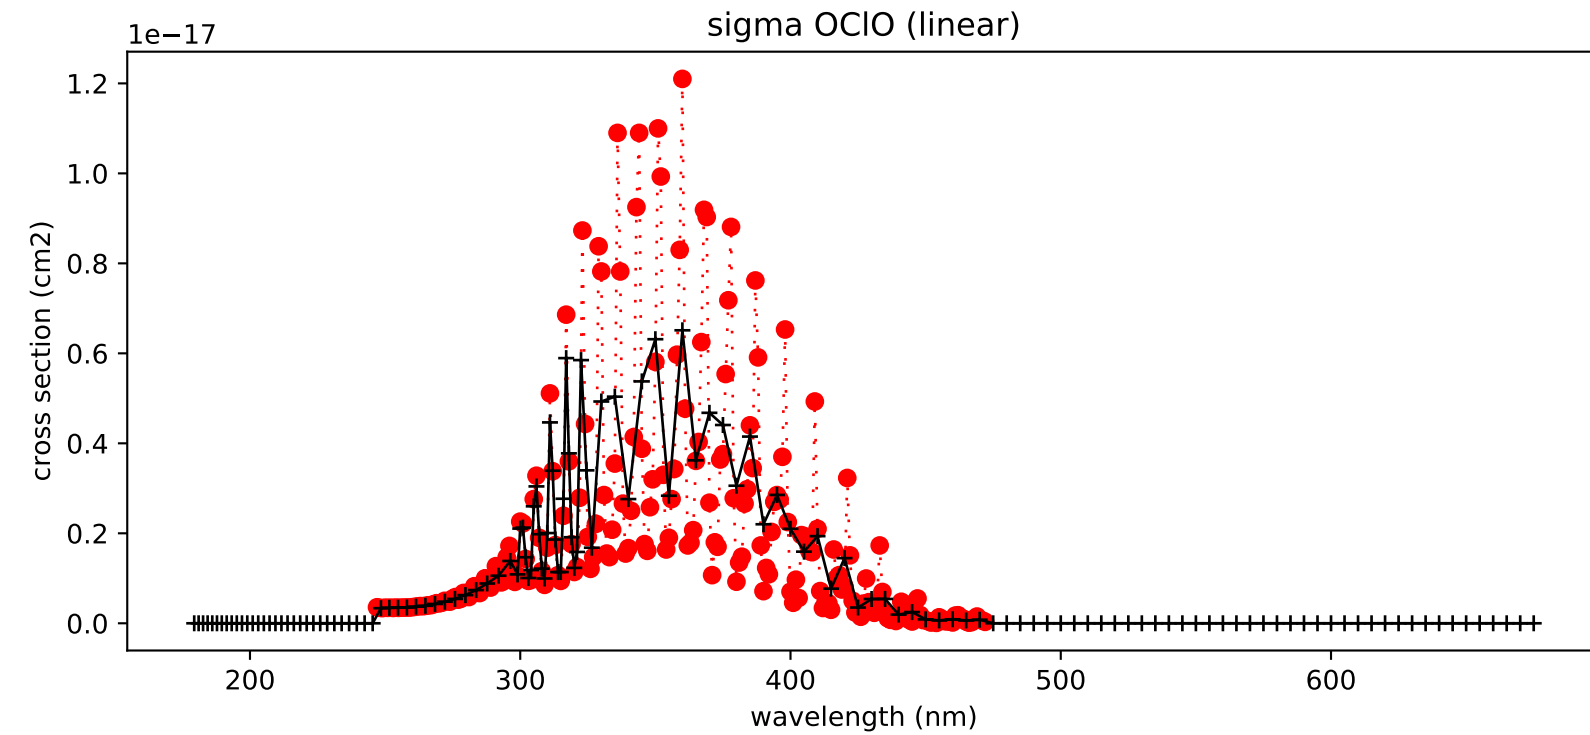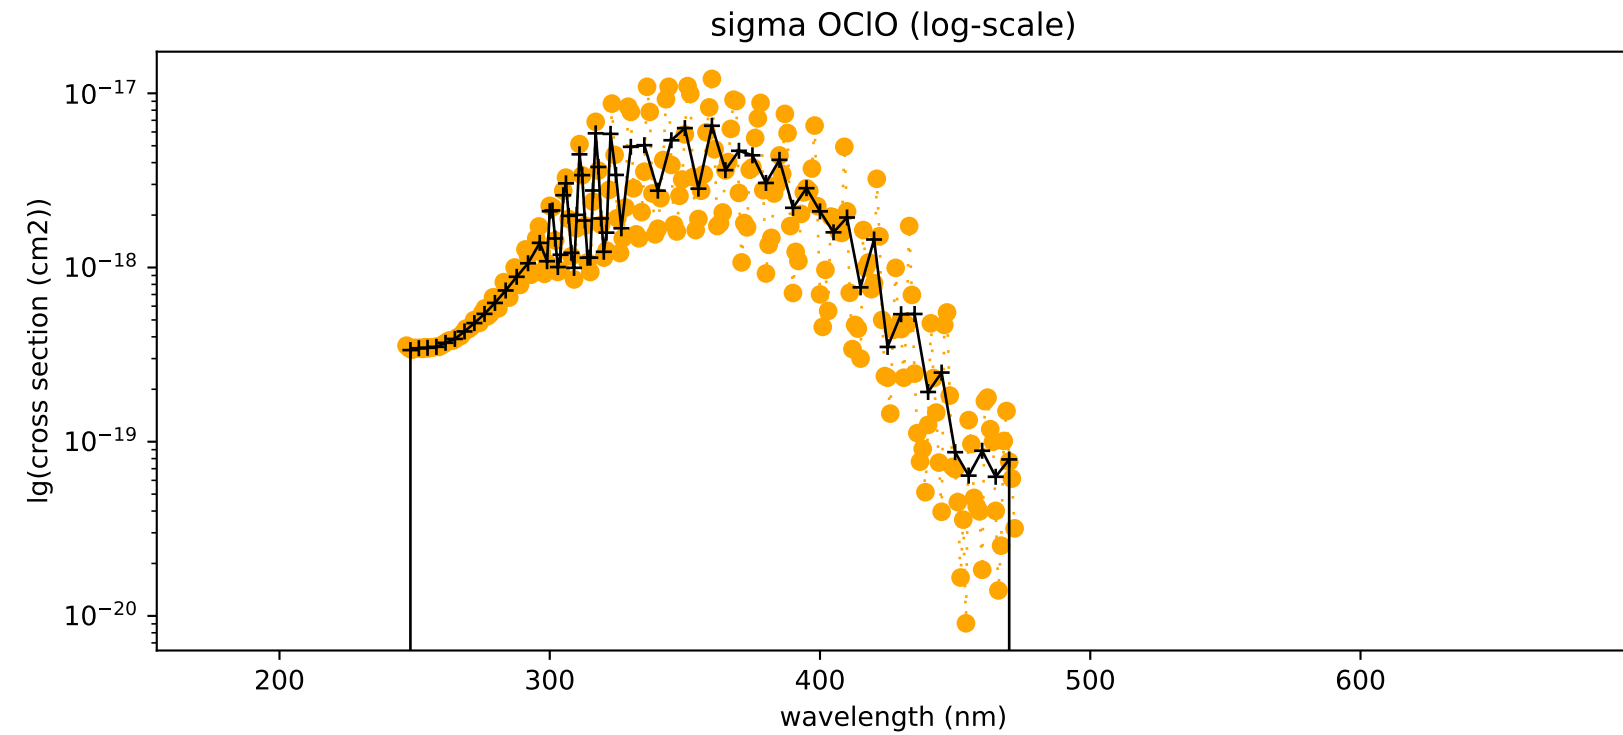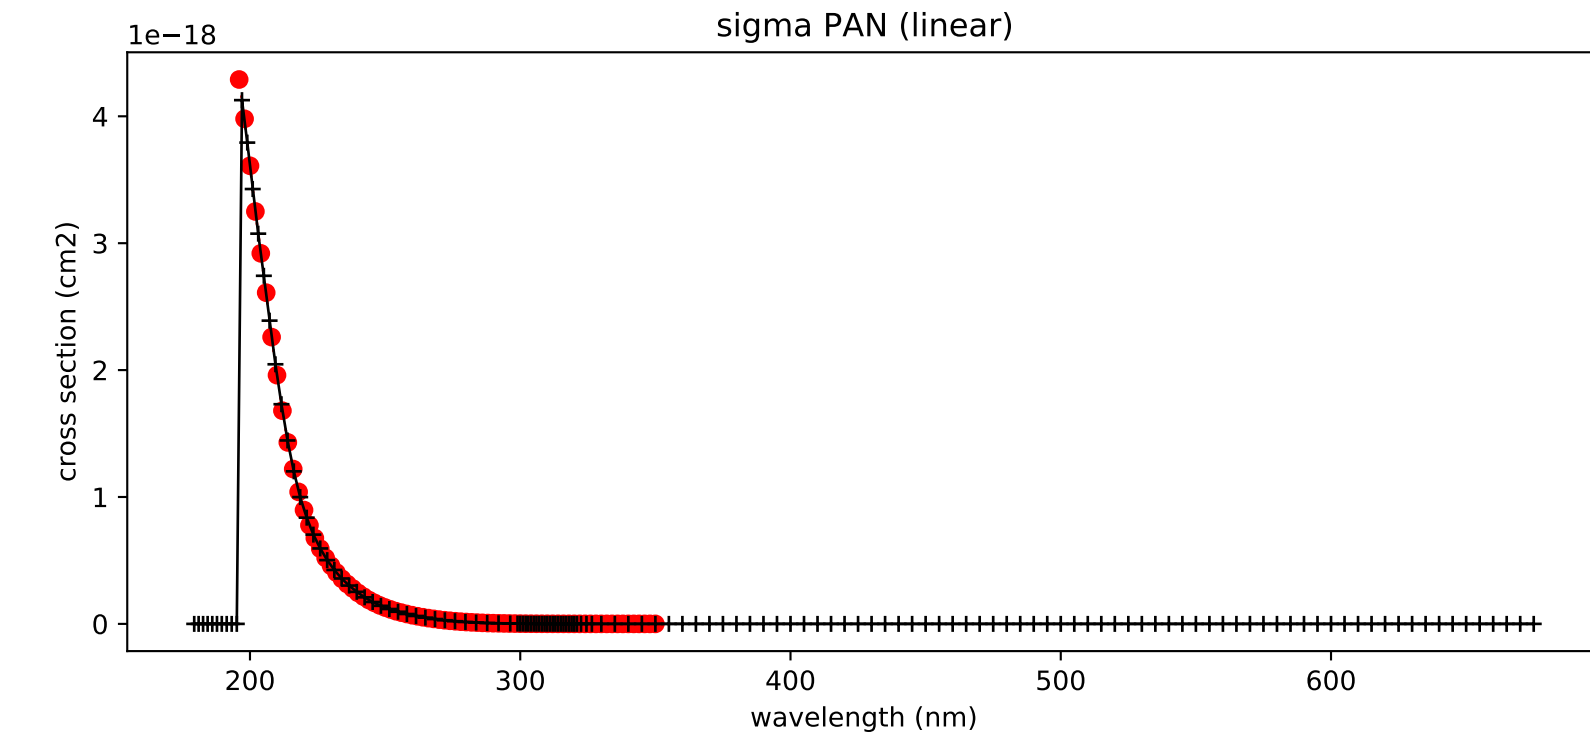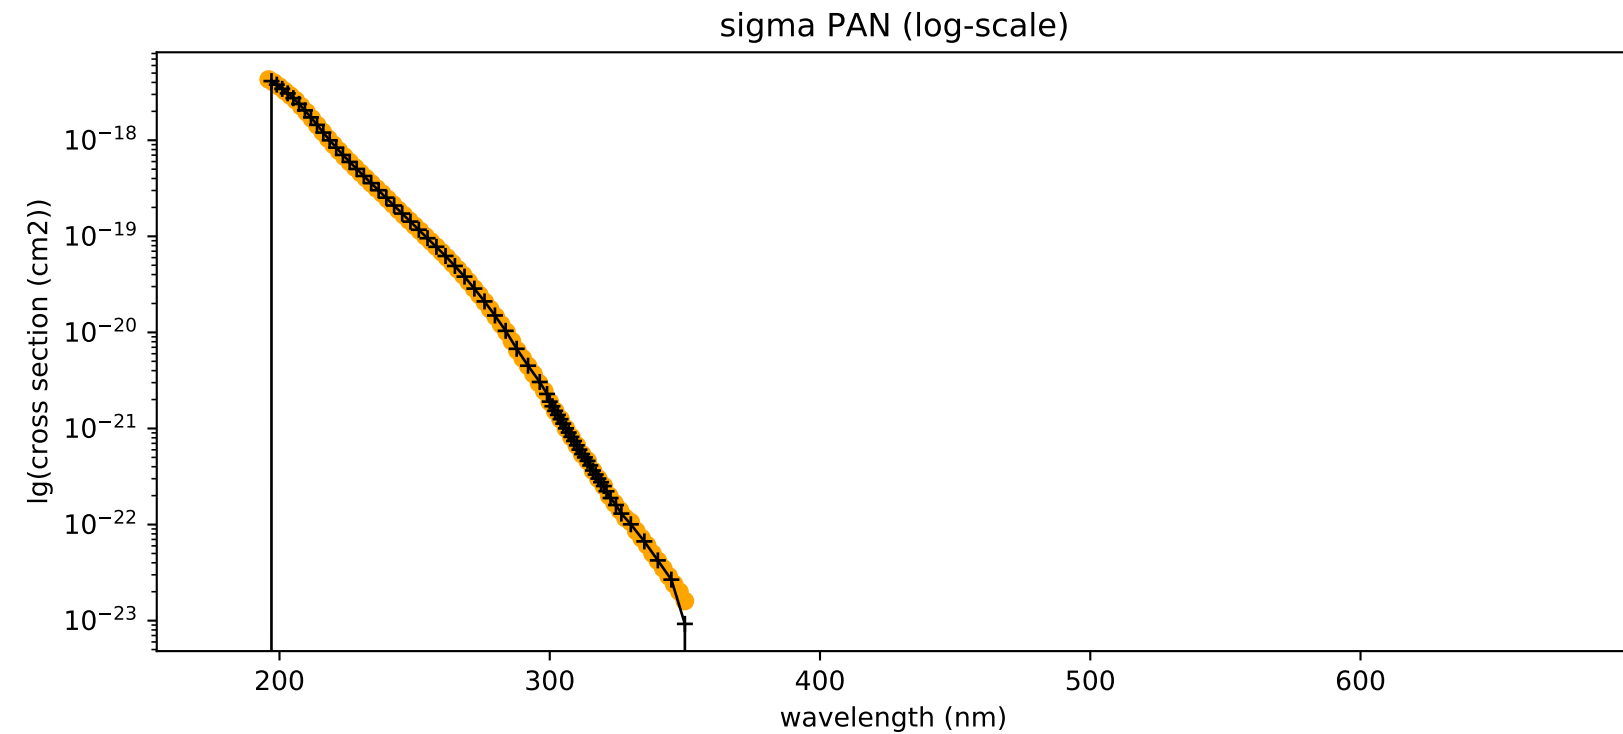

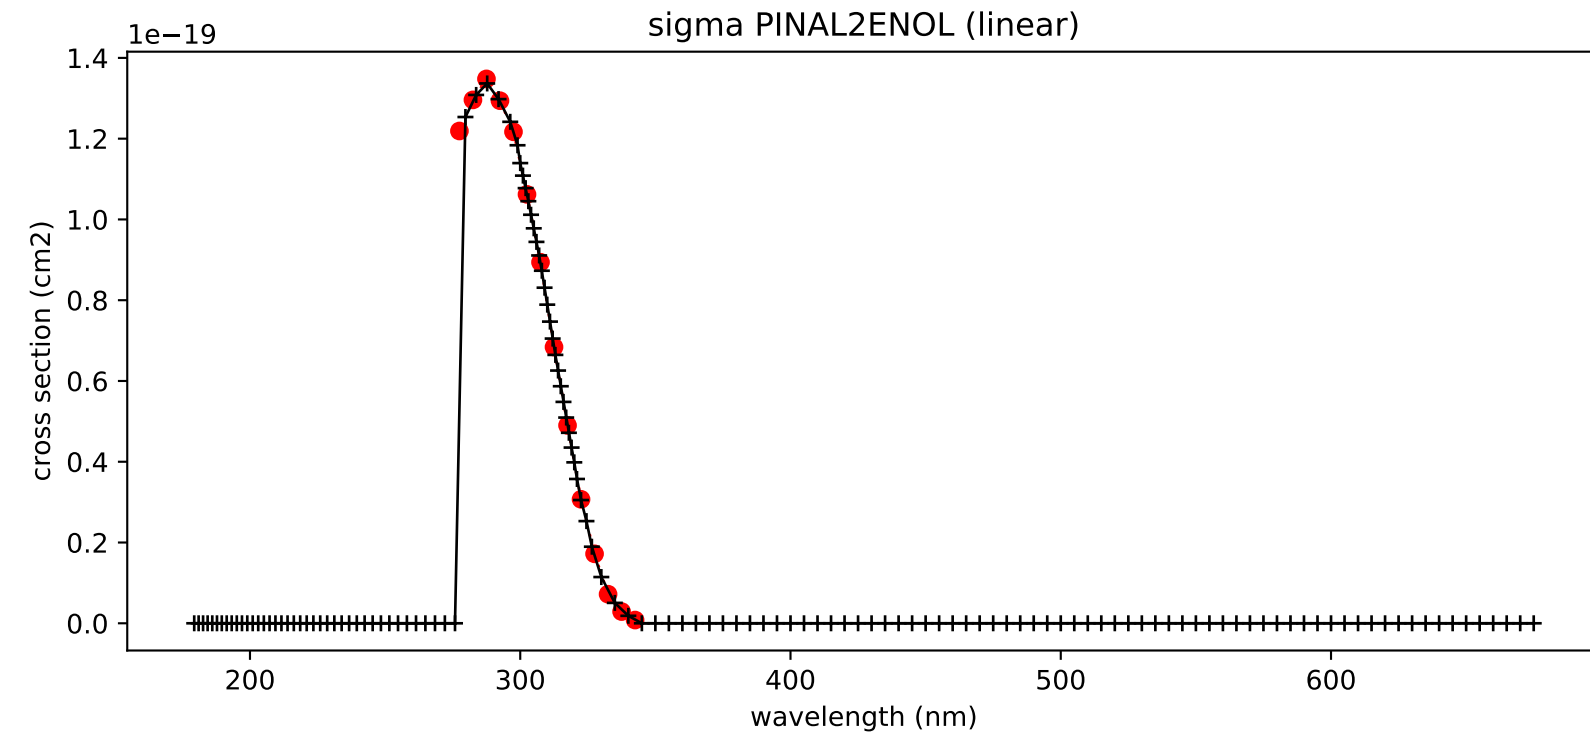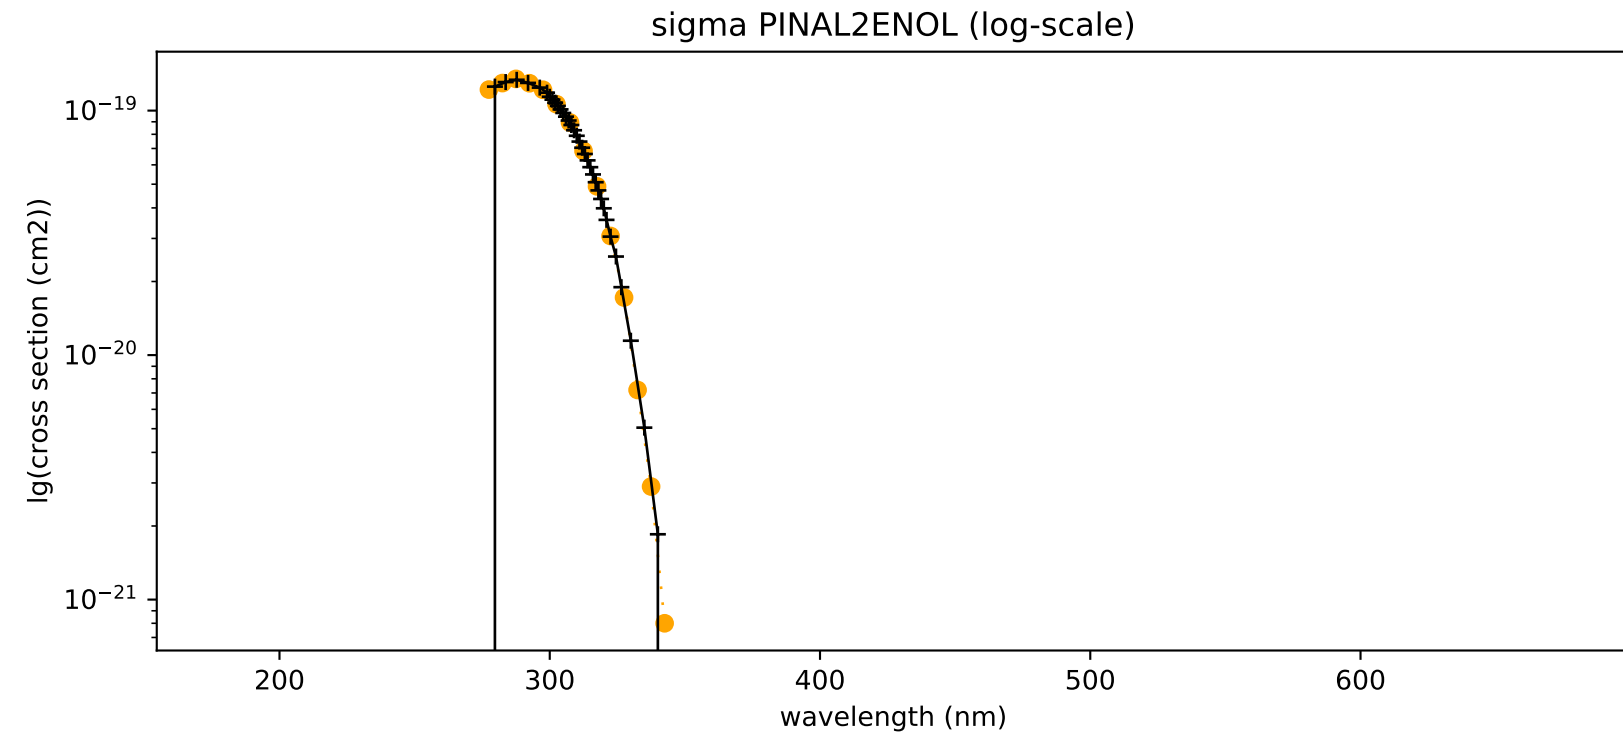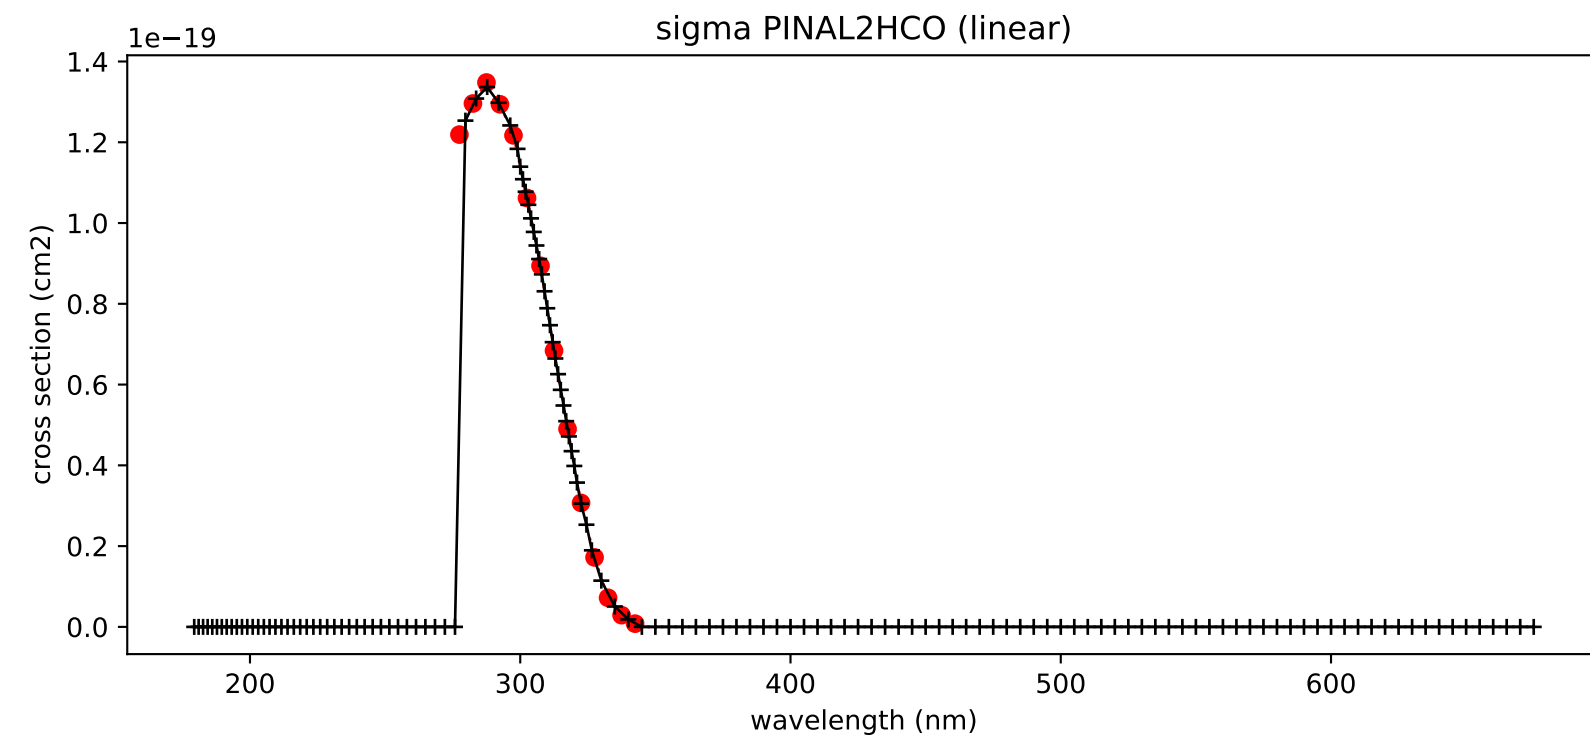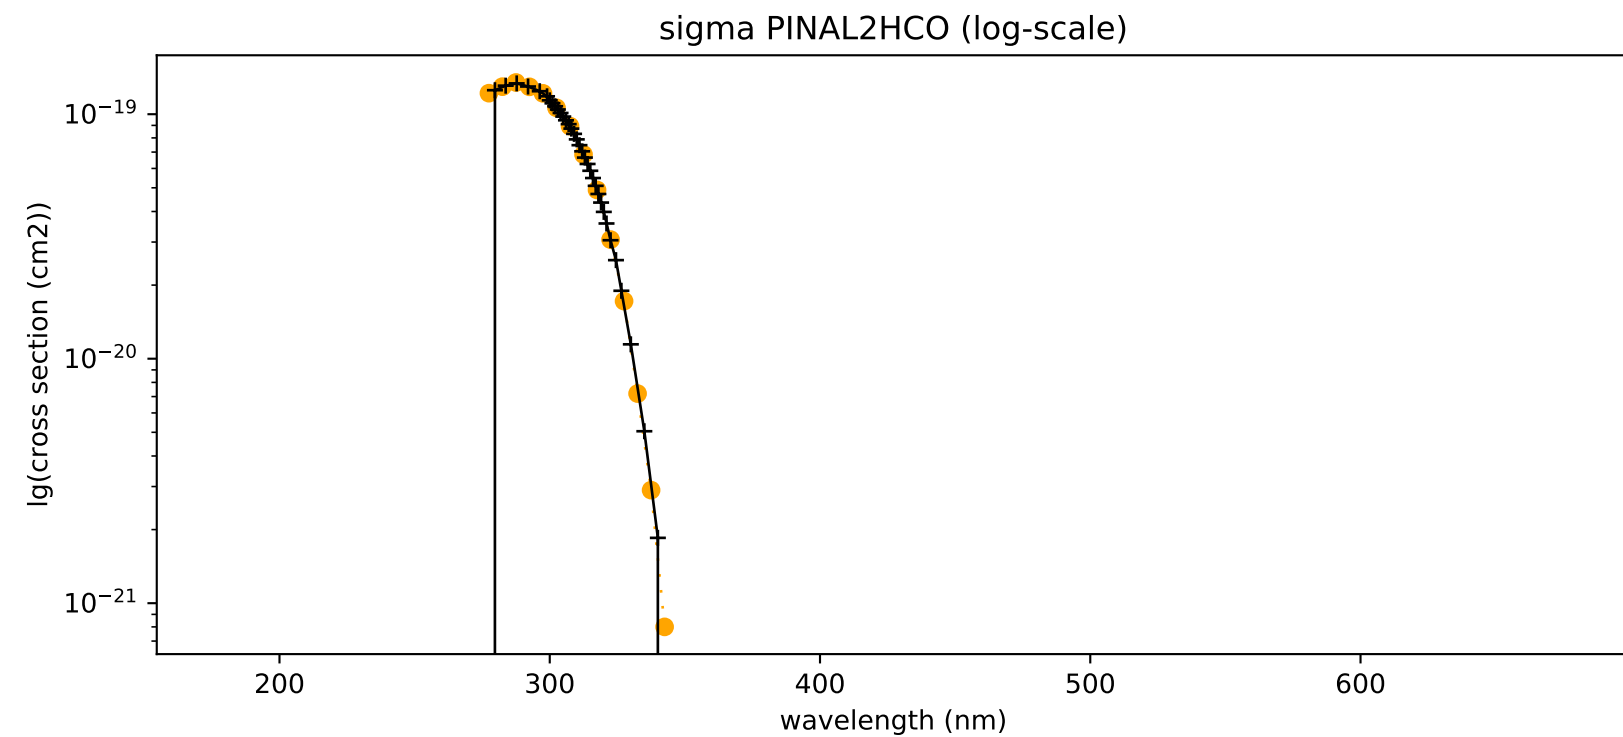

sigma PeDIONE24 (linear)

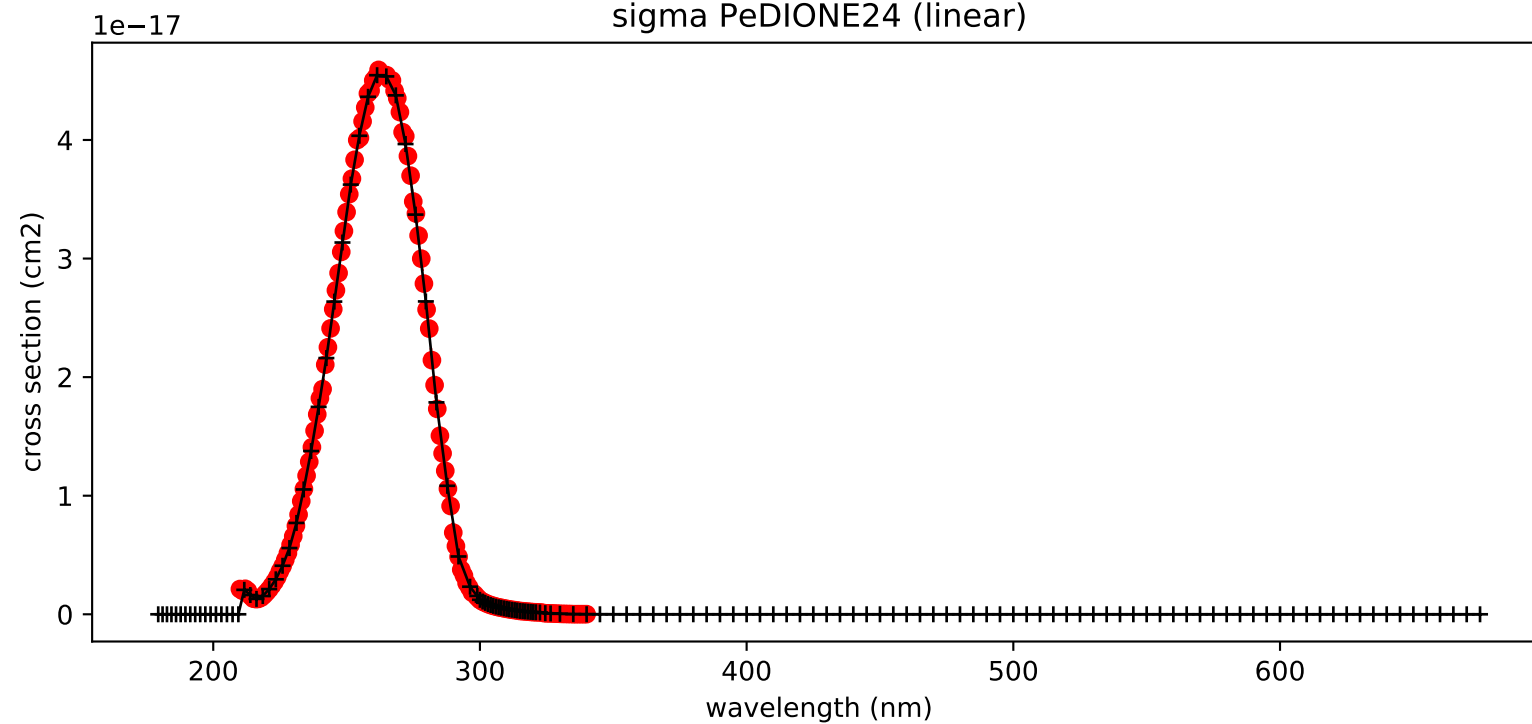

sigma PeDIONE24 (log-scale)

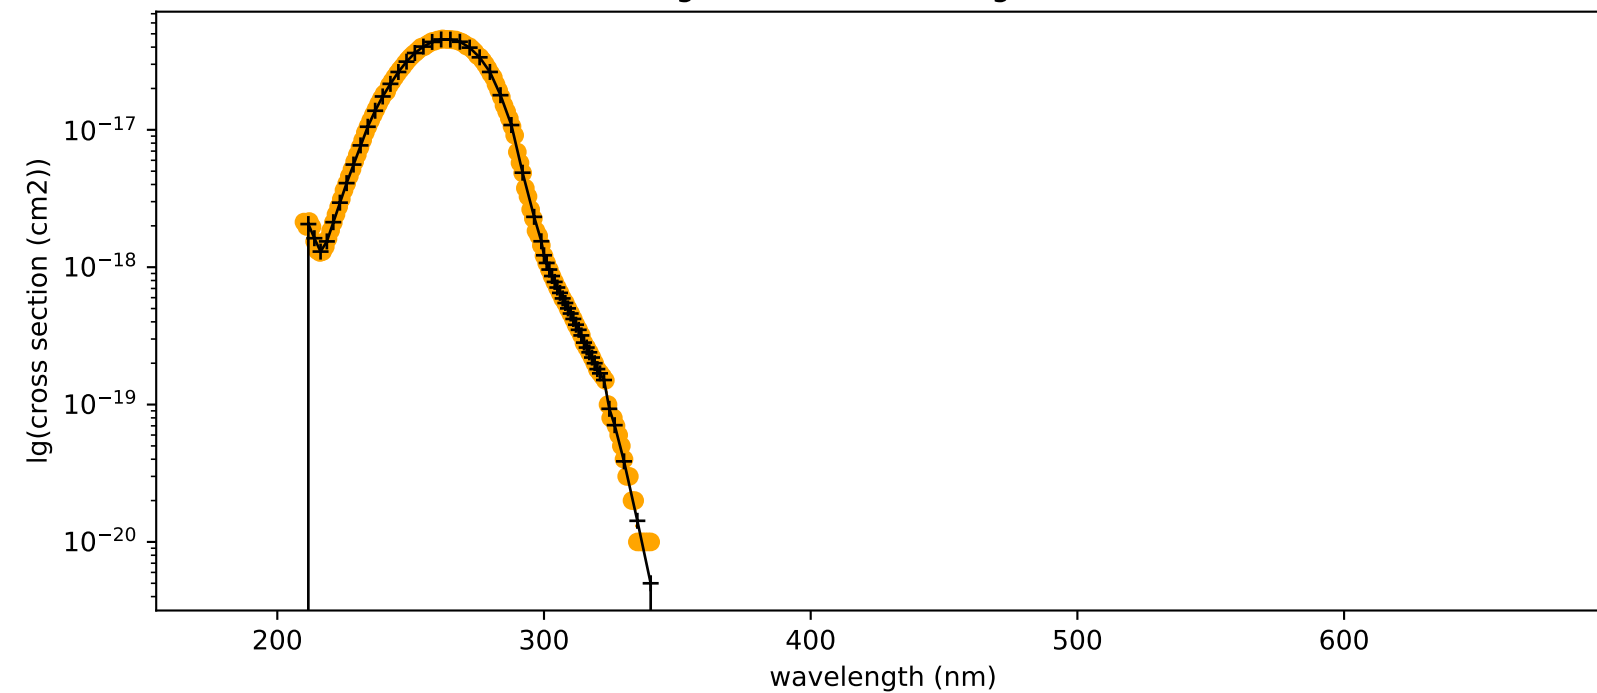

sigma SO2 (linear)

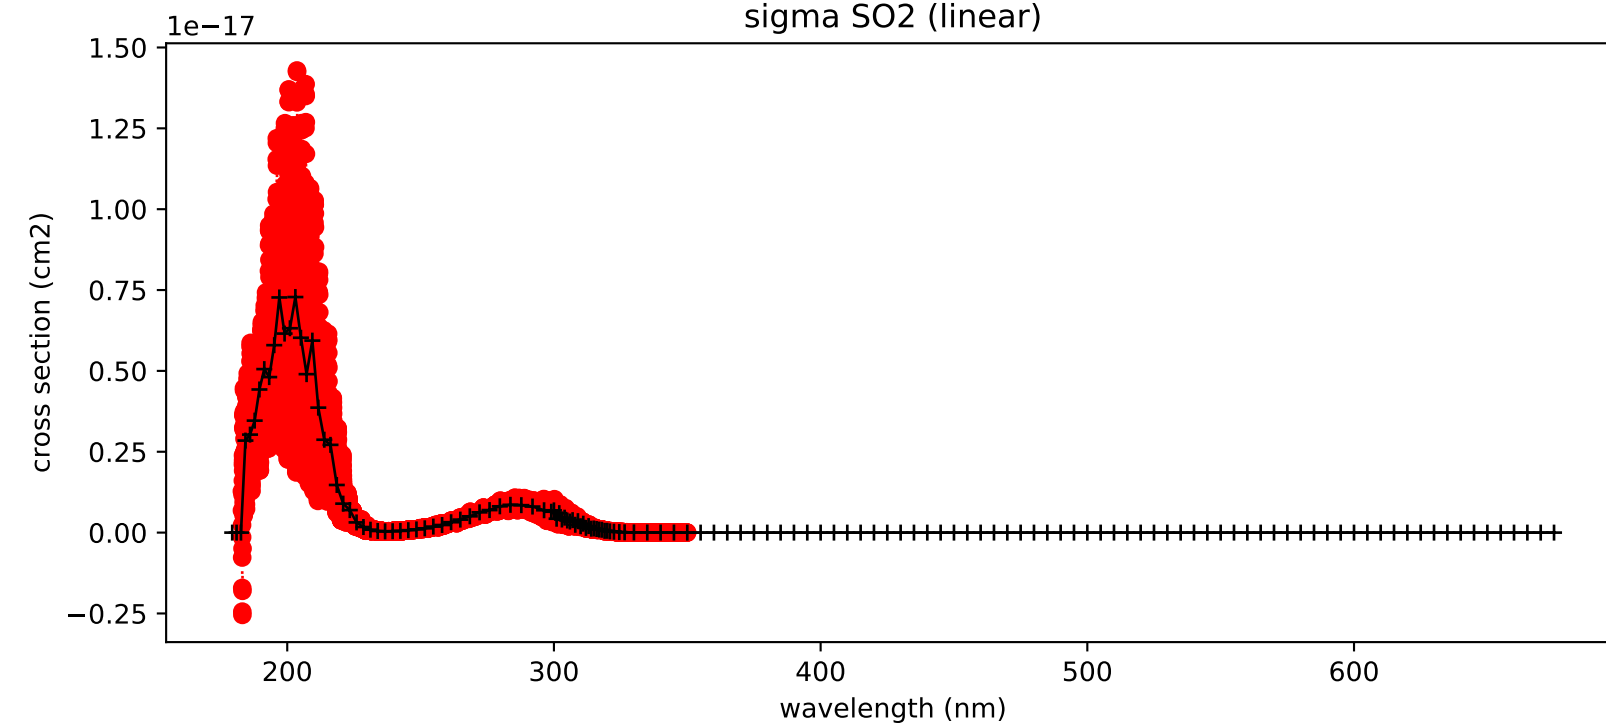

sigma SO2 (log-scale)

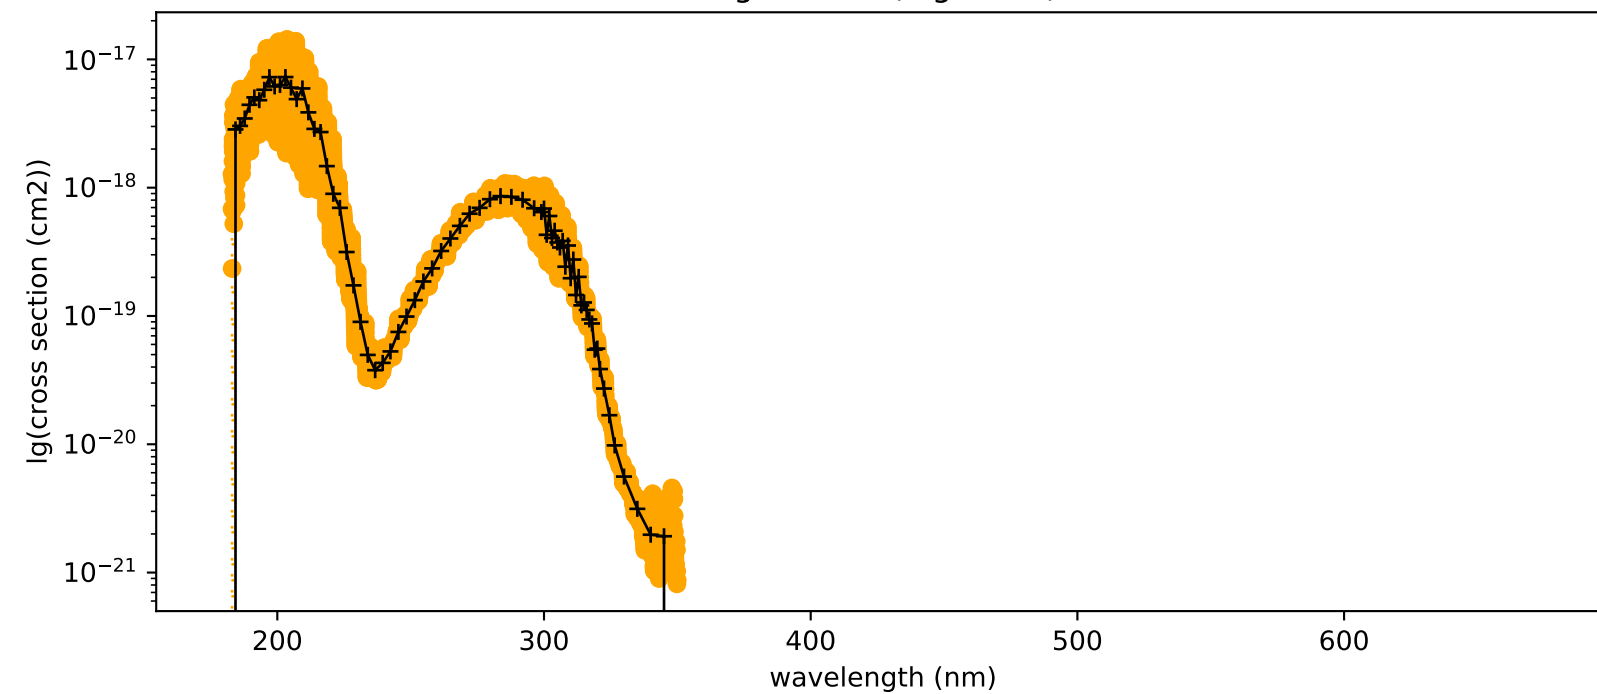

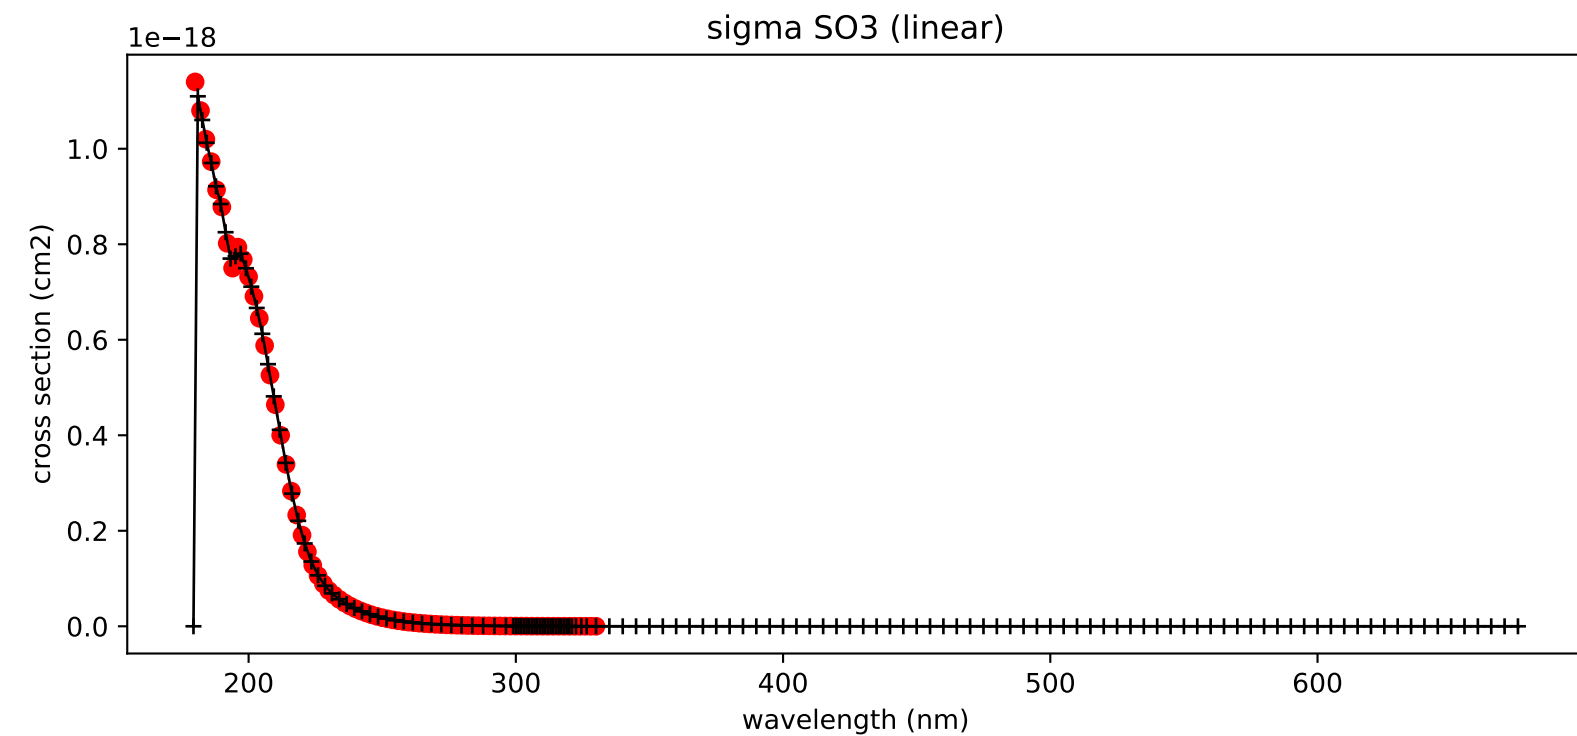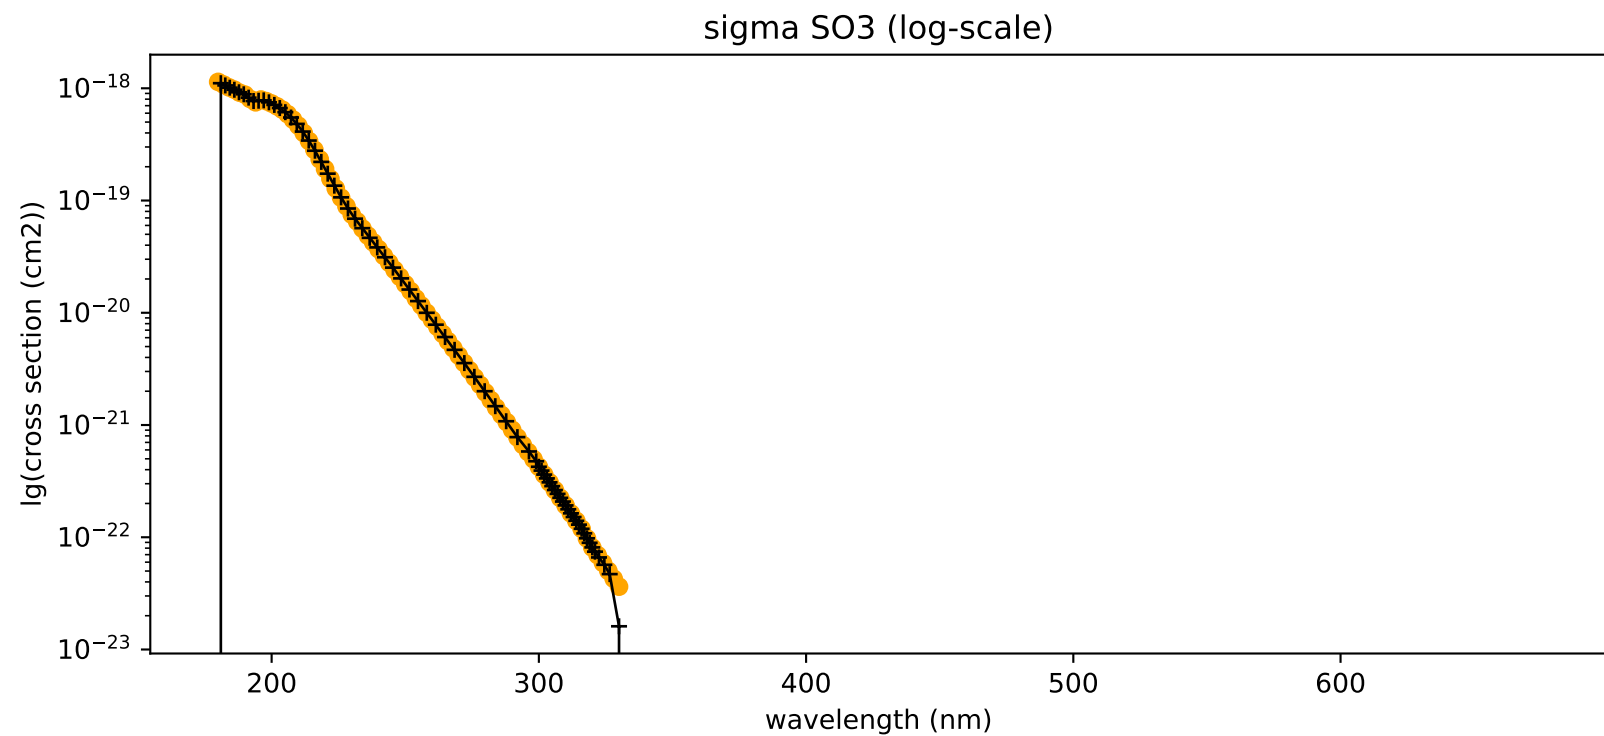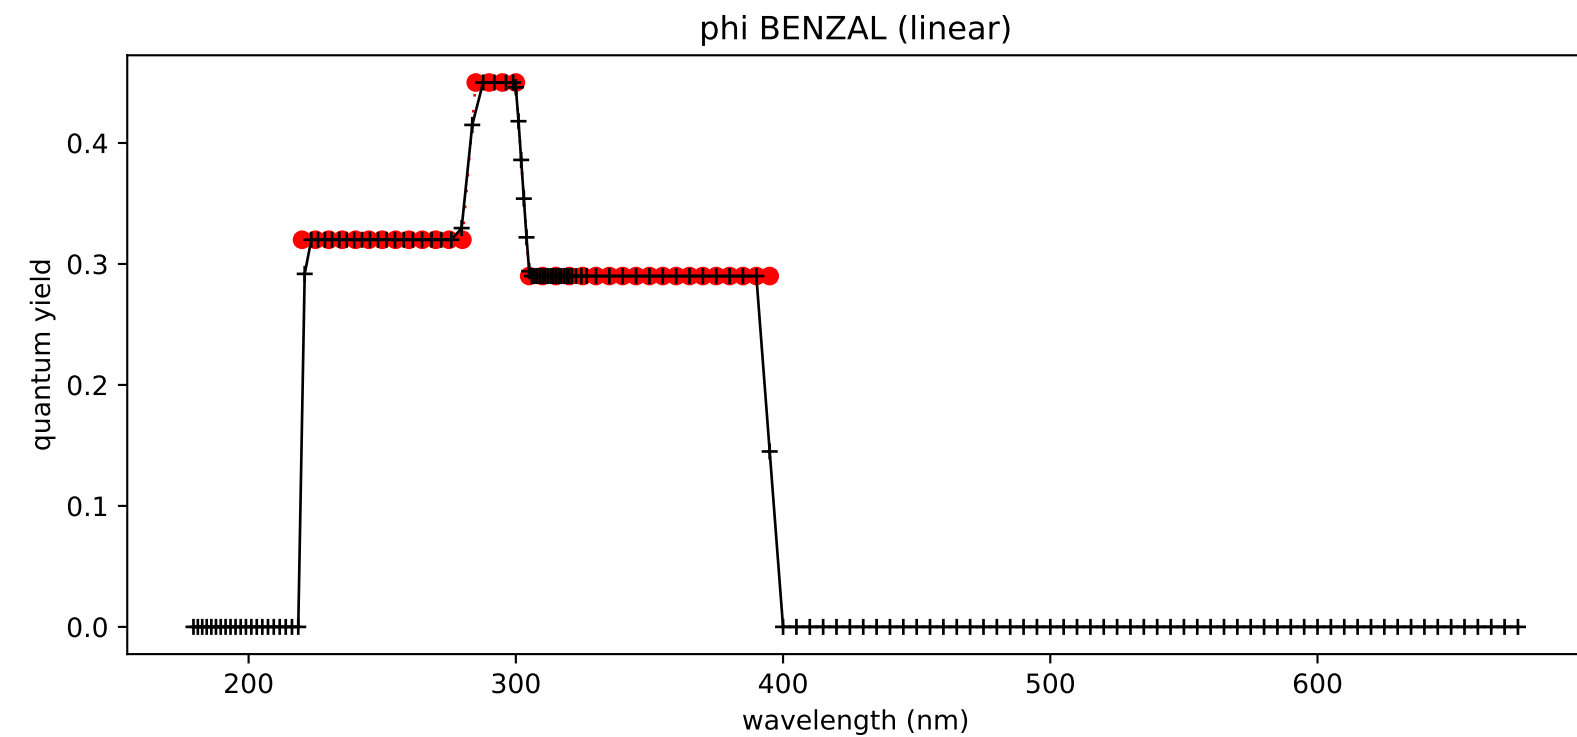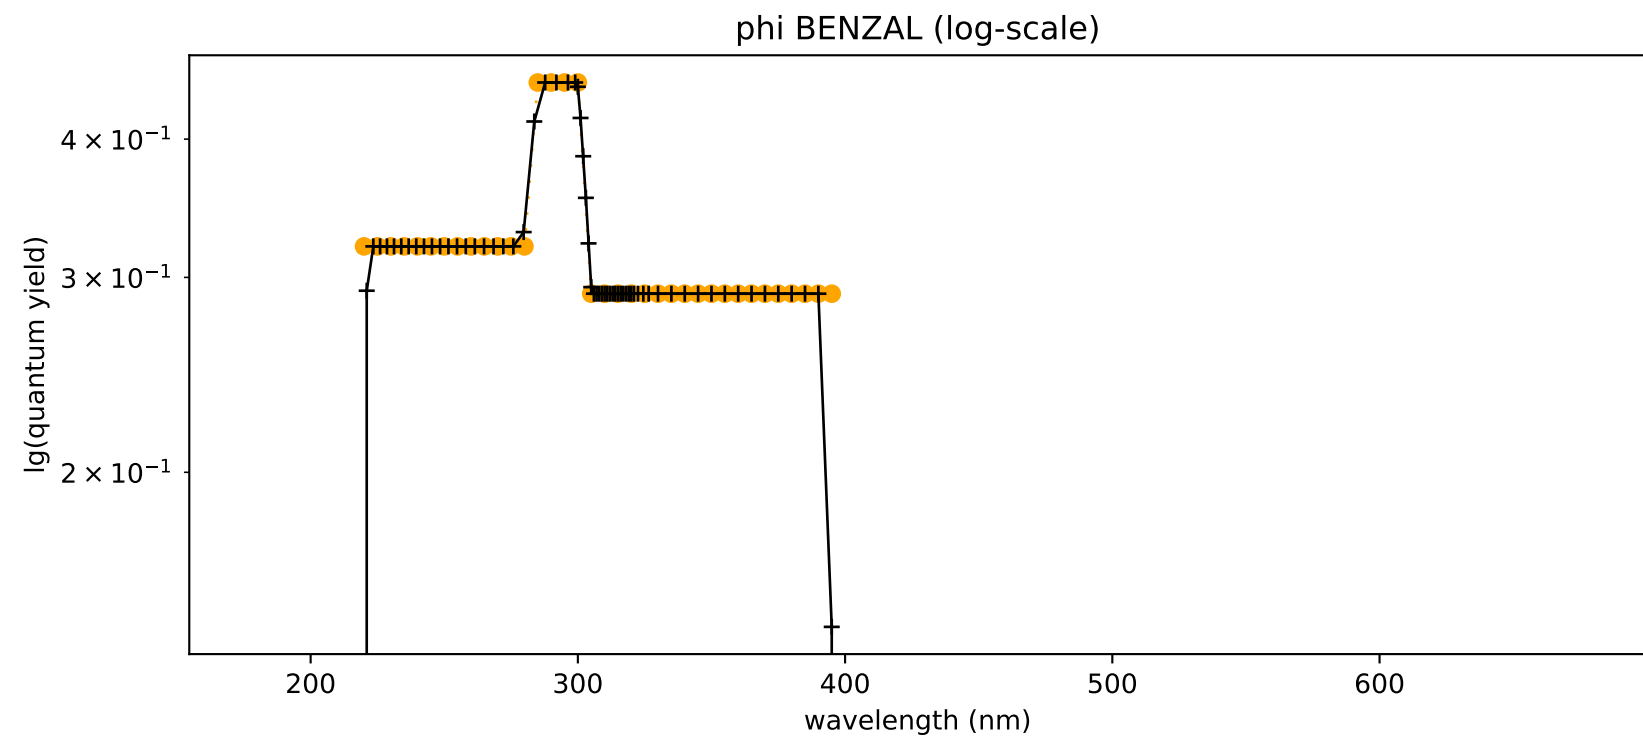

phi C2H5CHO2ENOL (linear)

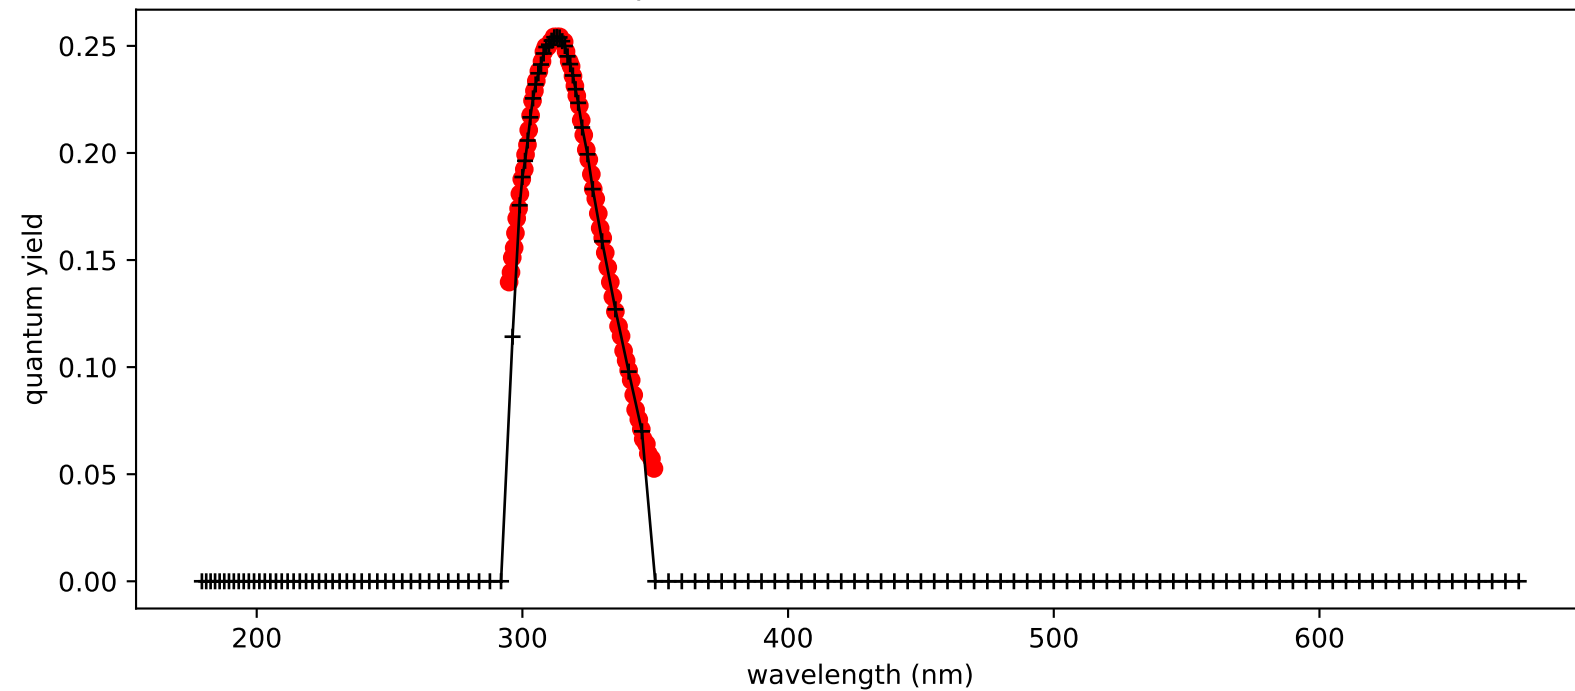

phi C2H5CHO2ENOL (log-scale)

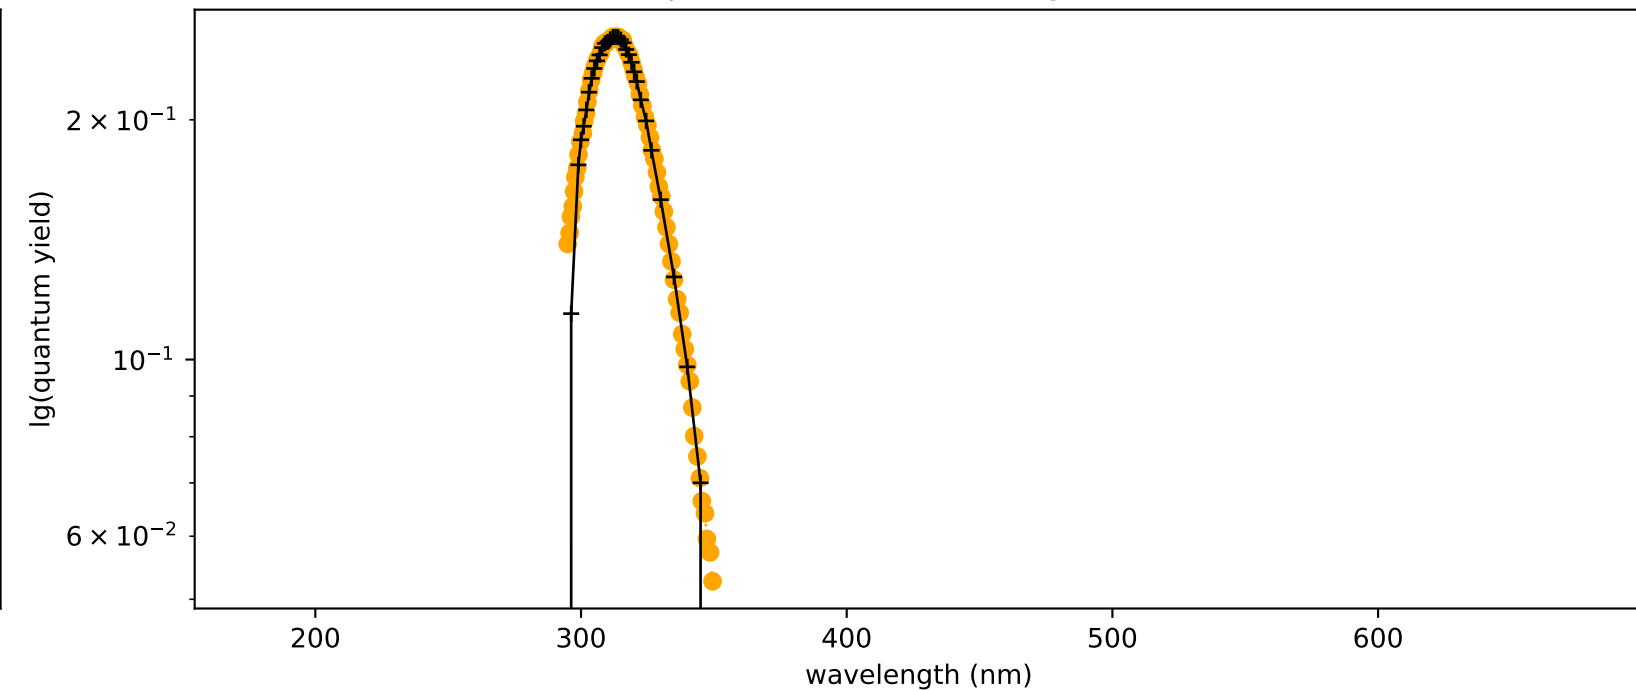

phi C2H5CHO2HCO (linear)

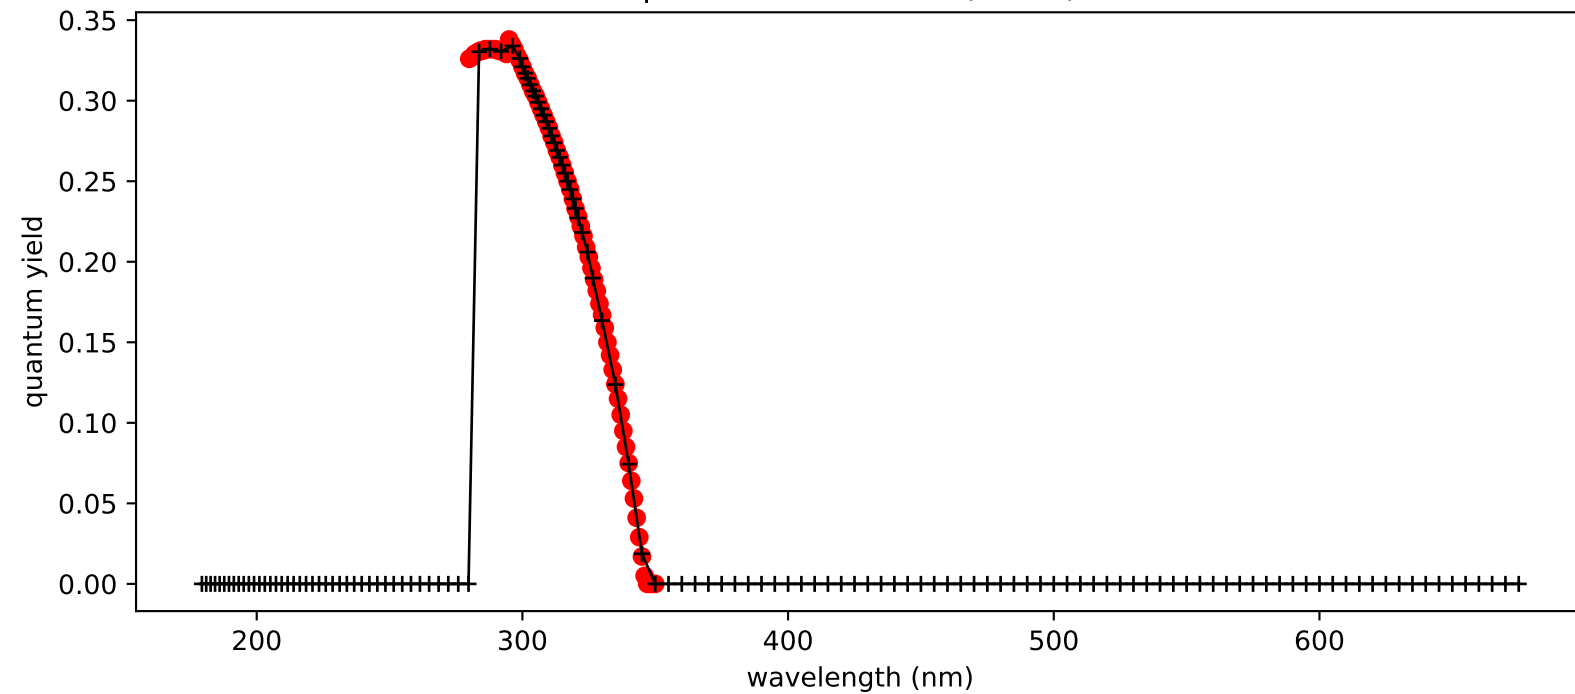

phi C2H5CHO2HCO (log-scale)

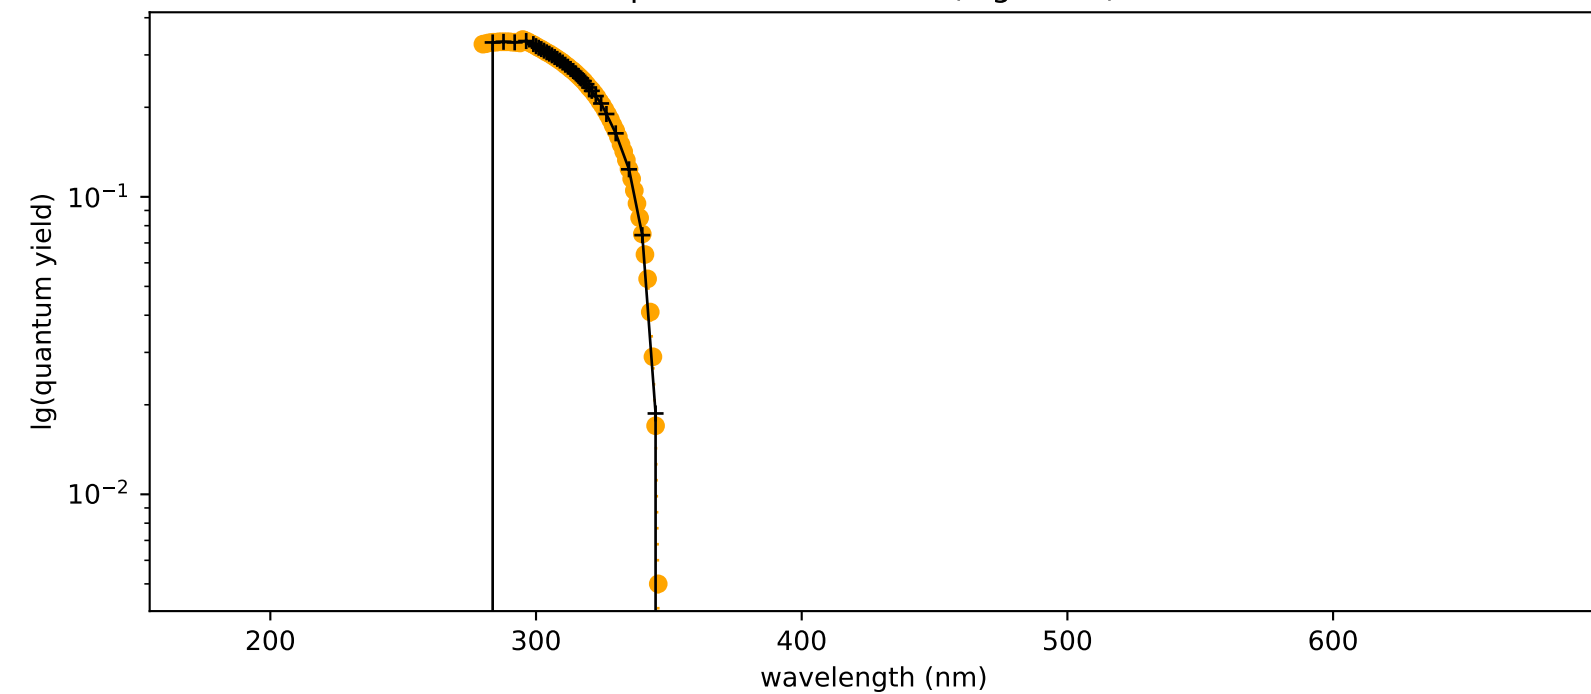

phi C3H7CHO2HCO (linear)

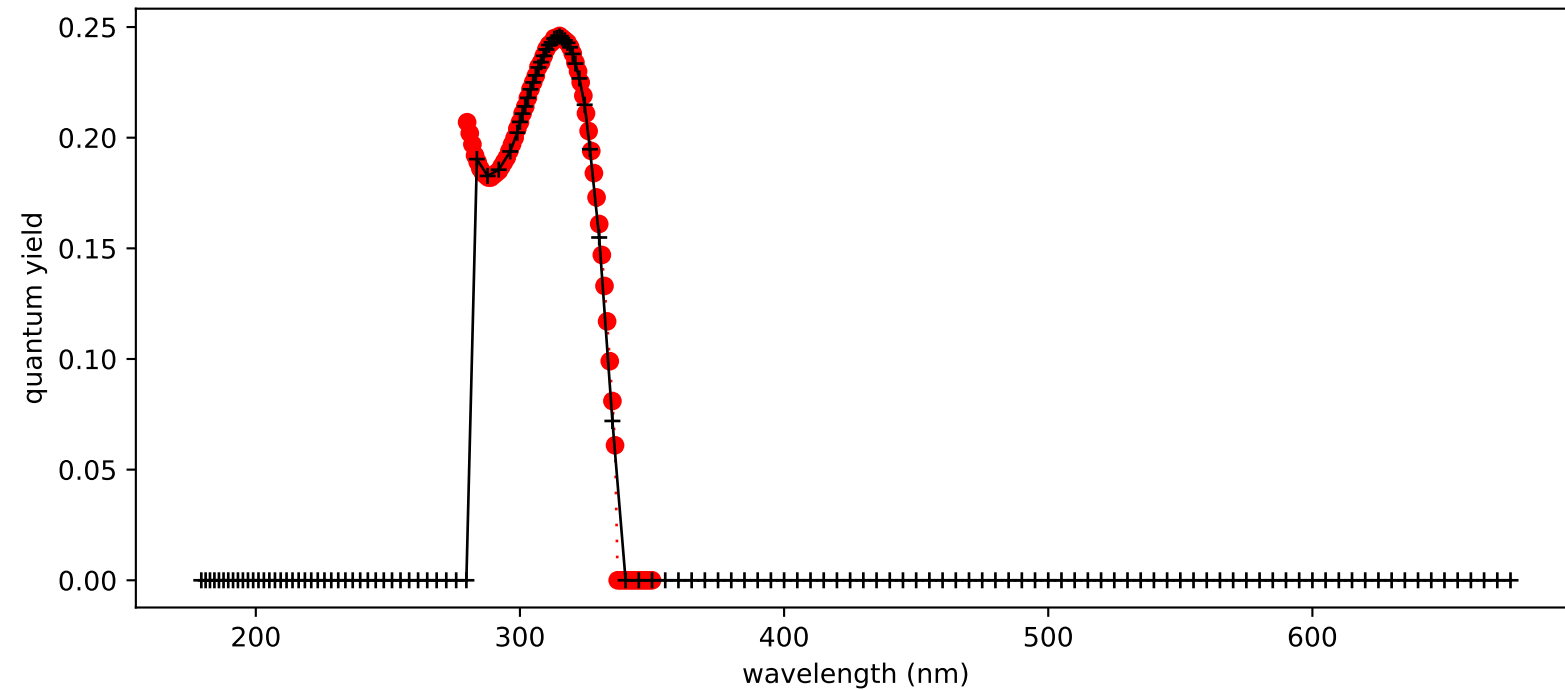

phi C3H7CHO2HCO (log-scale)

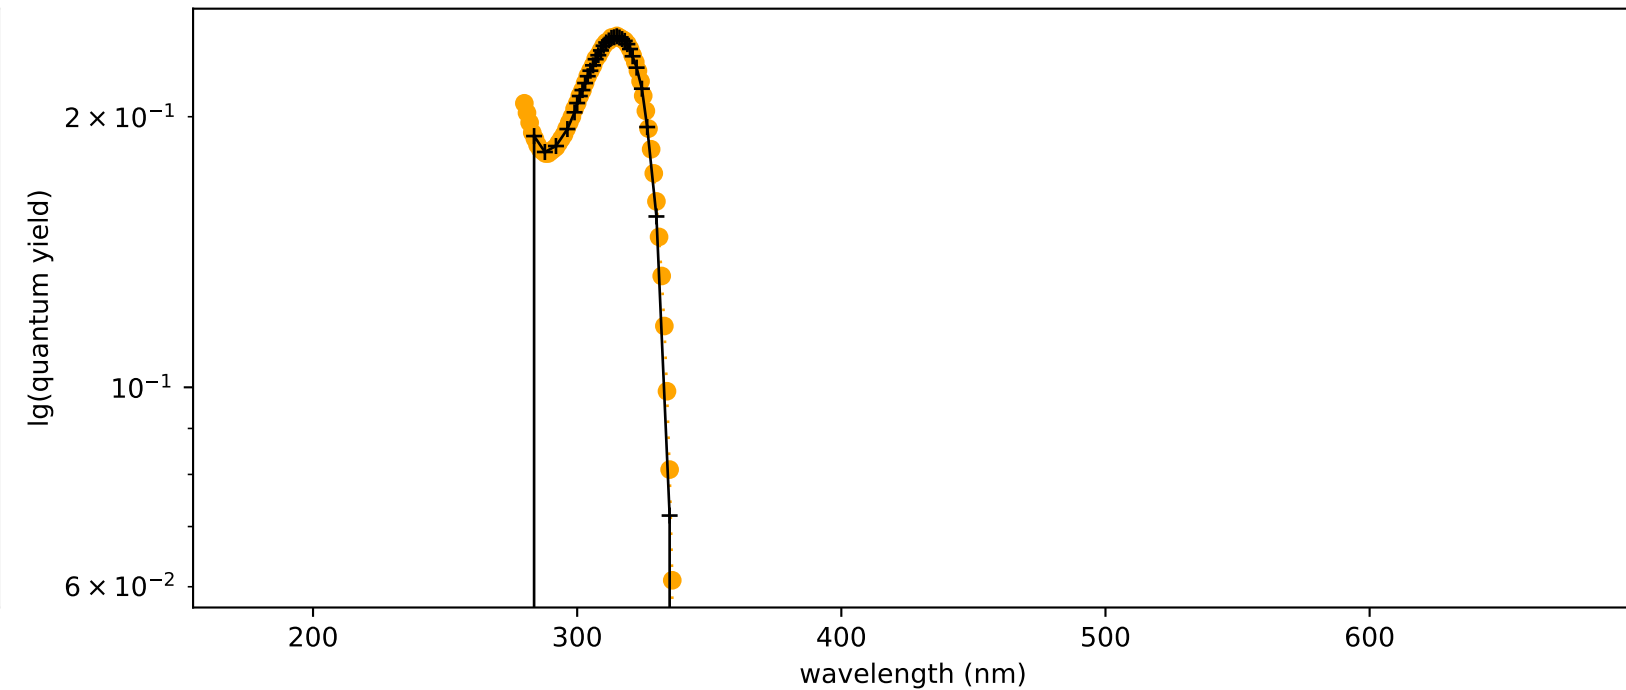

phi C3H7CHO2VINY (linear)

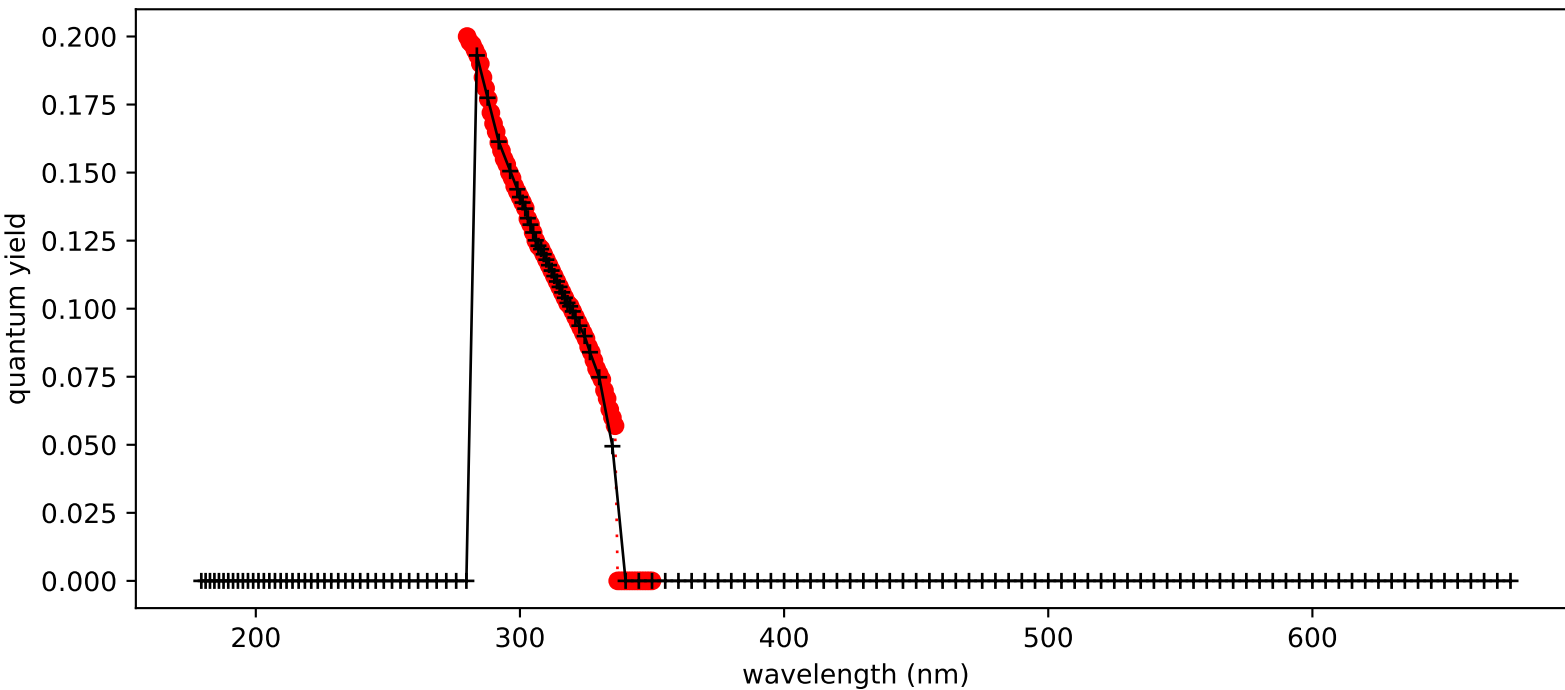

phi C3H7CHO2VINY (log-scale)

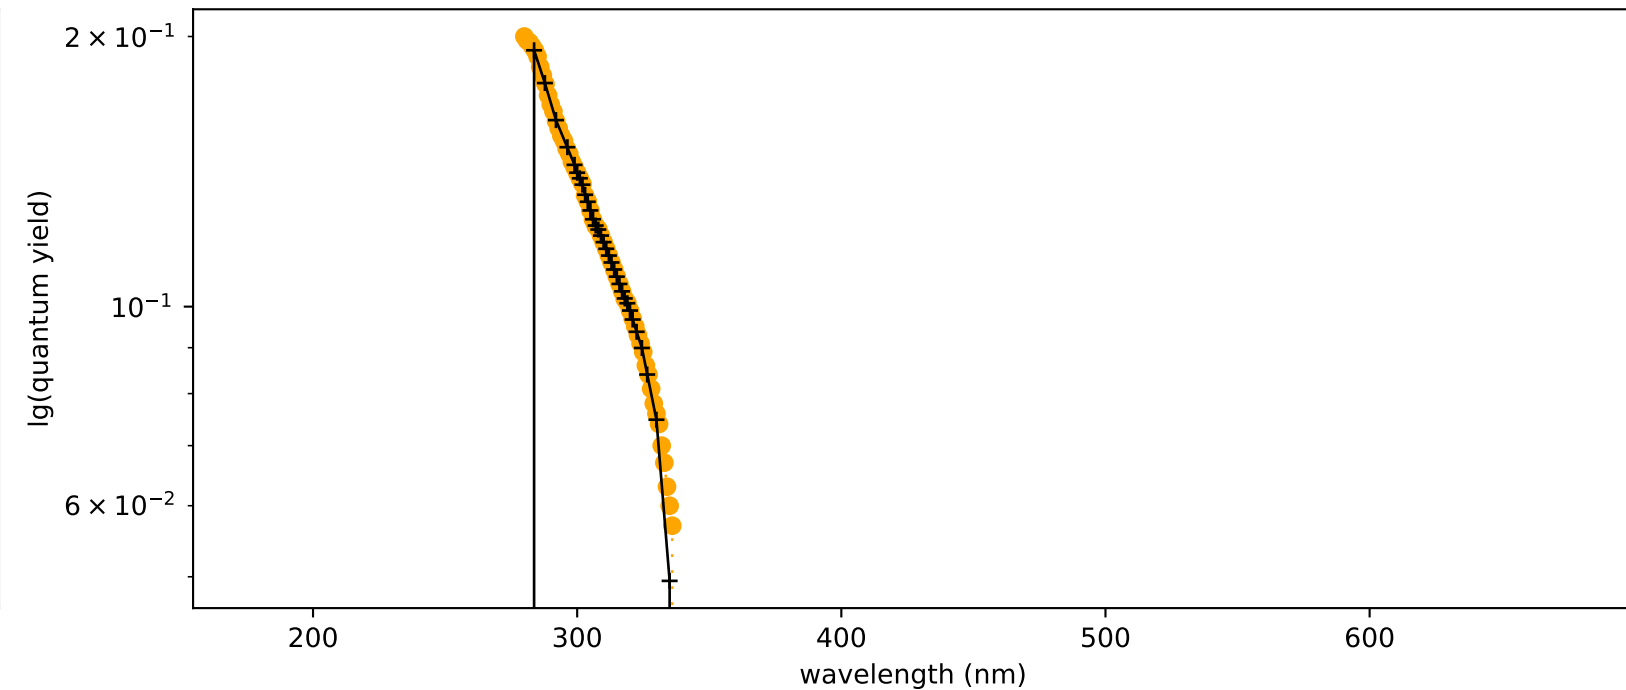

phi CH3CHO (linear)

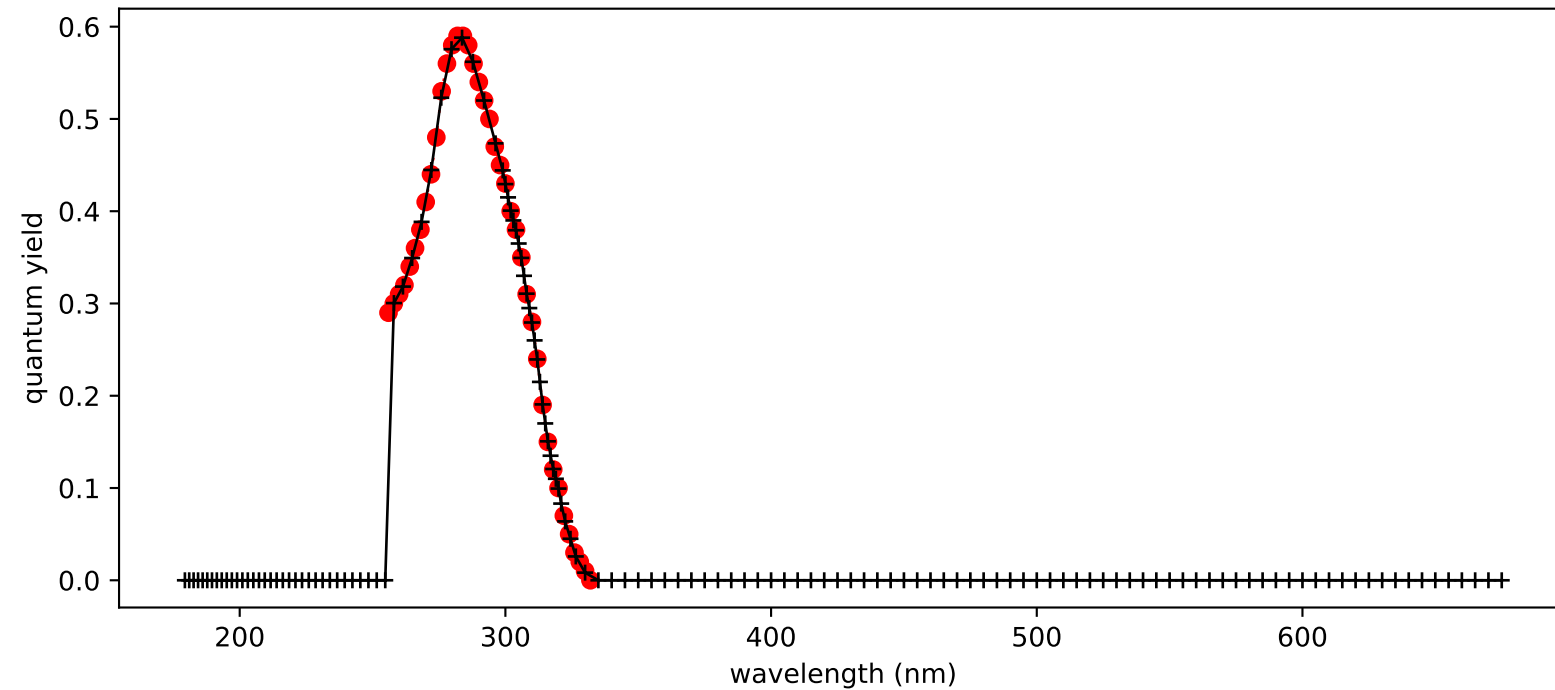

phi CH3CHO (log-scale)

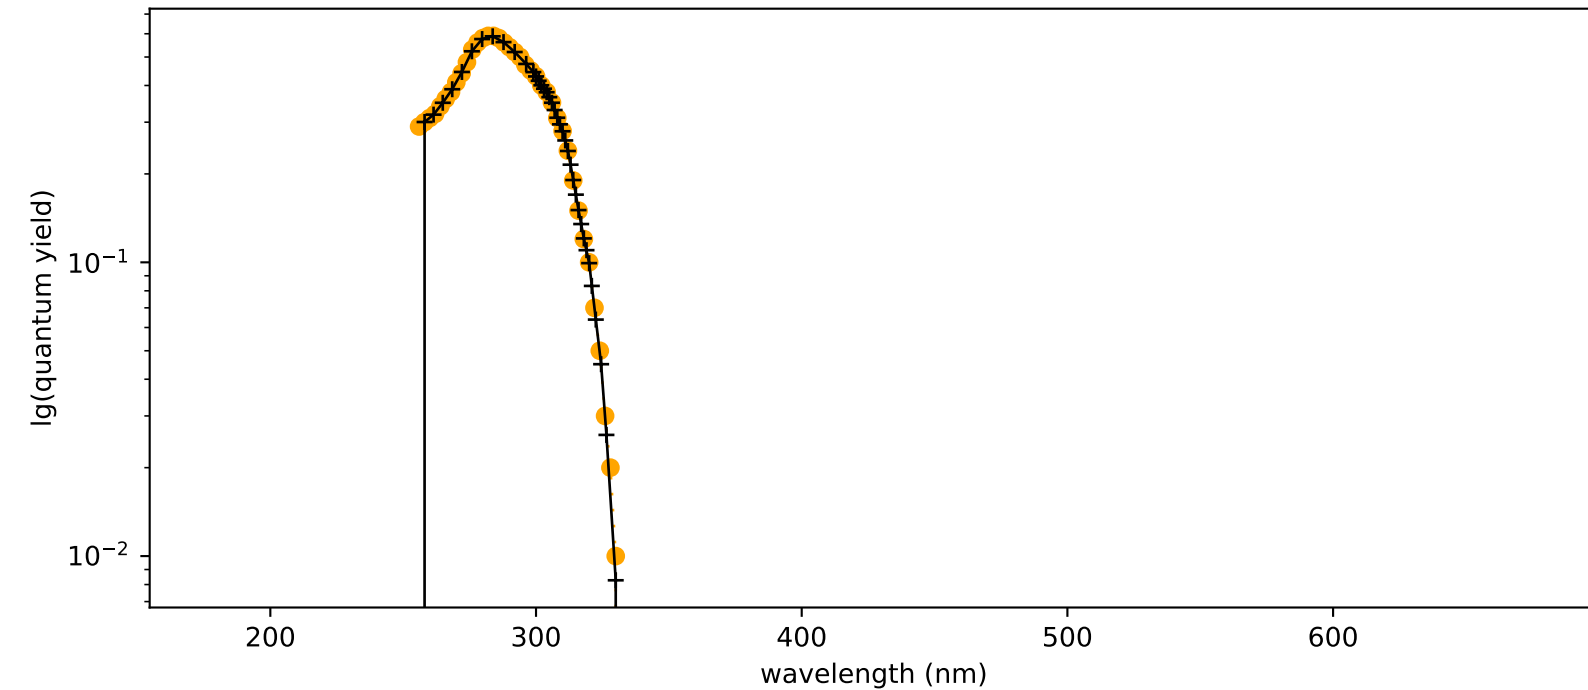

phi CH3CHO2VINY (linear)

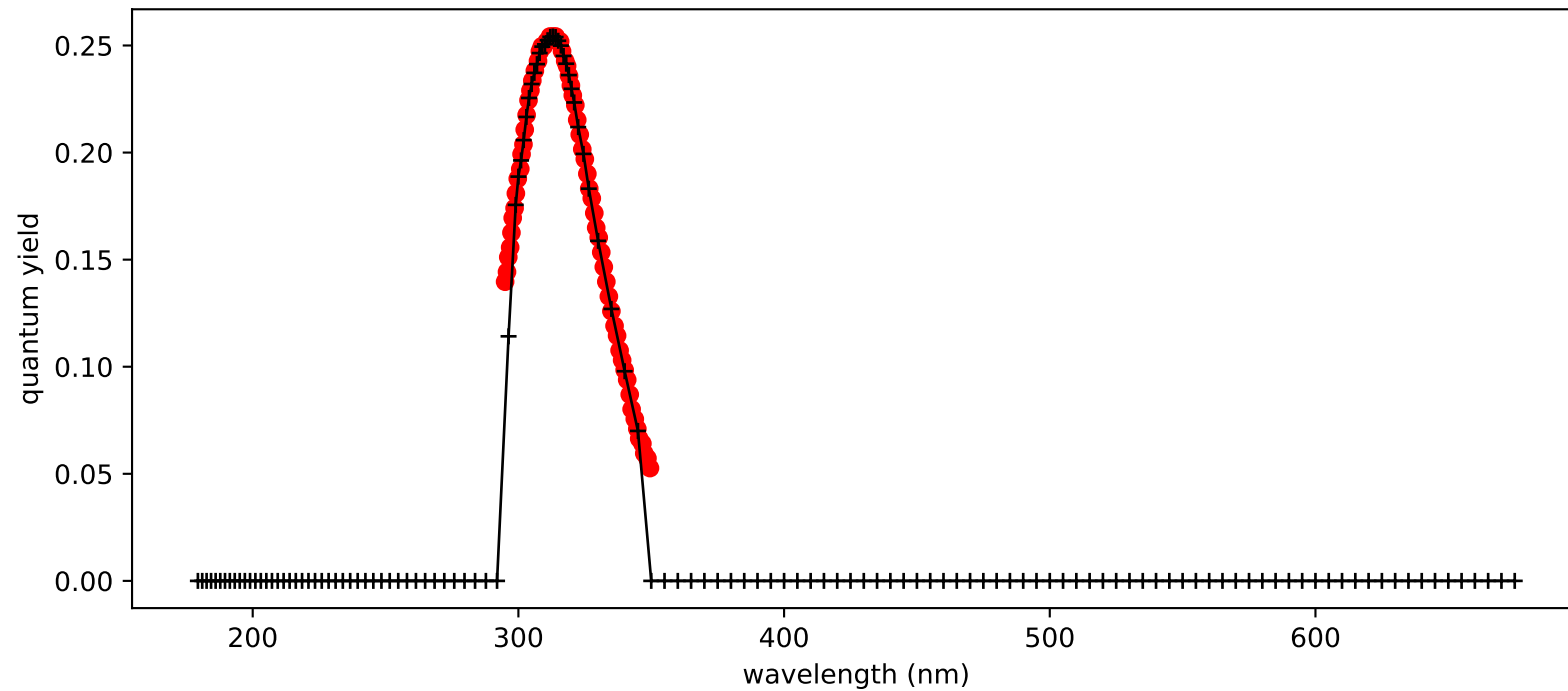

phi CH3CHO2VINY (log-scale)

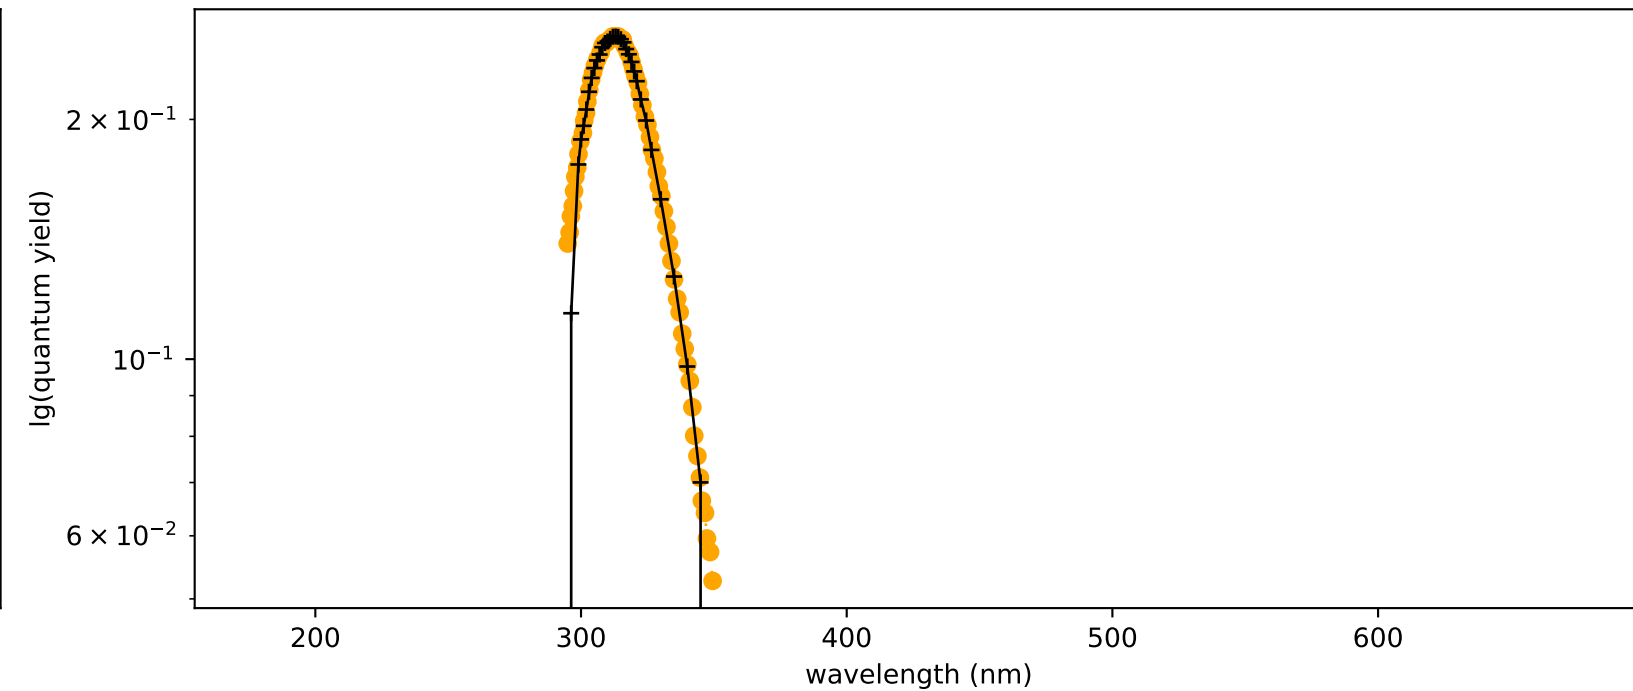



phi CH3ONO (linear)

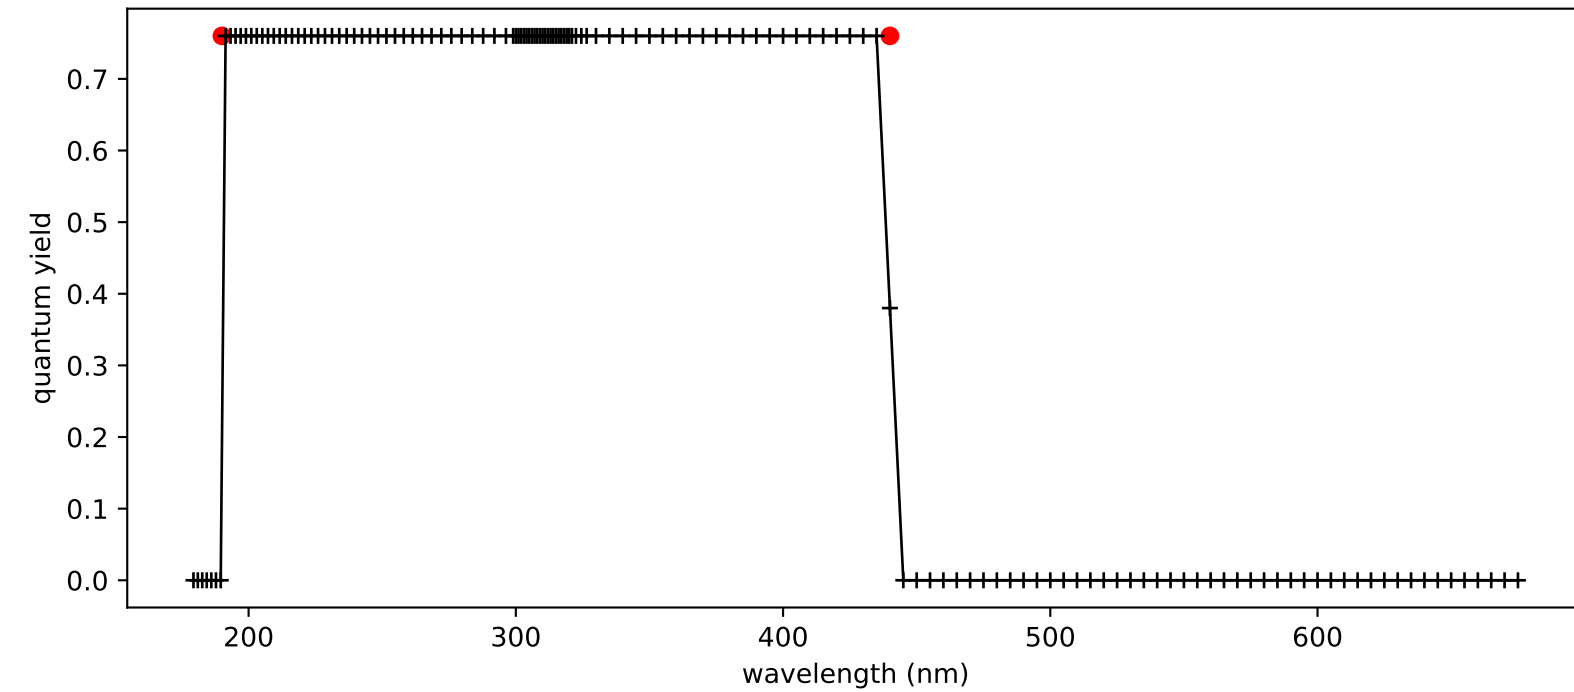

phi CH3ONO (log-scale)

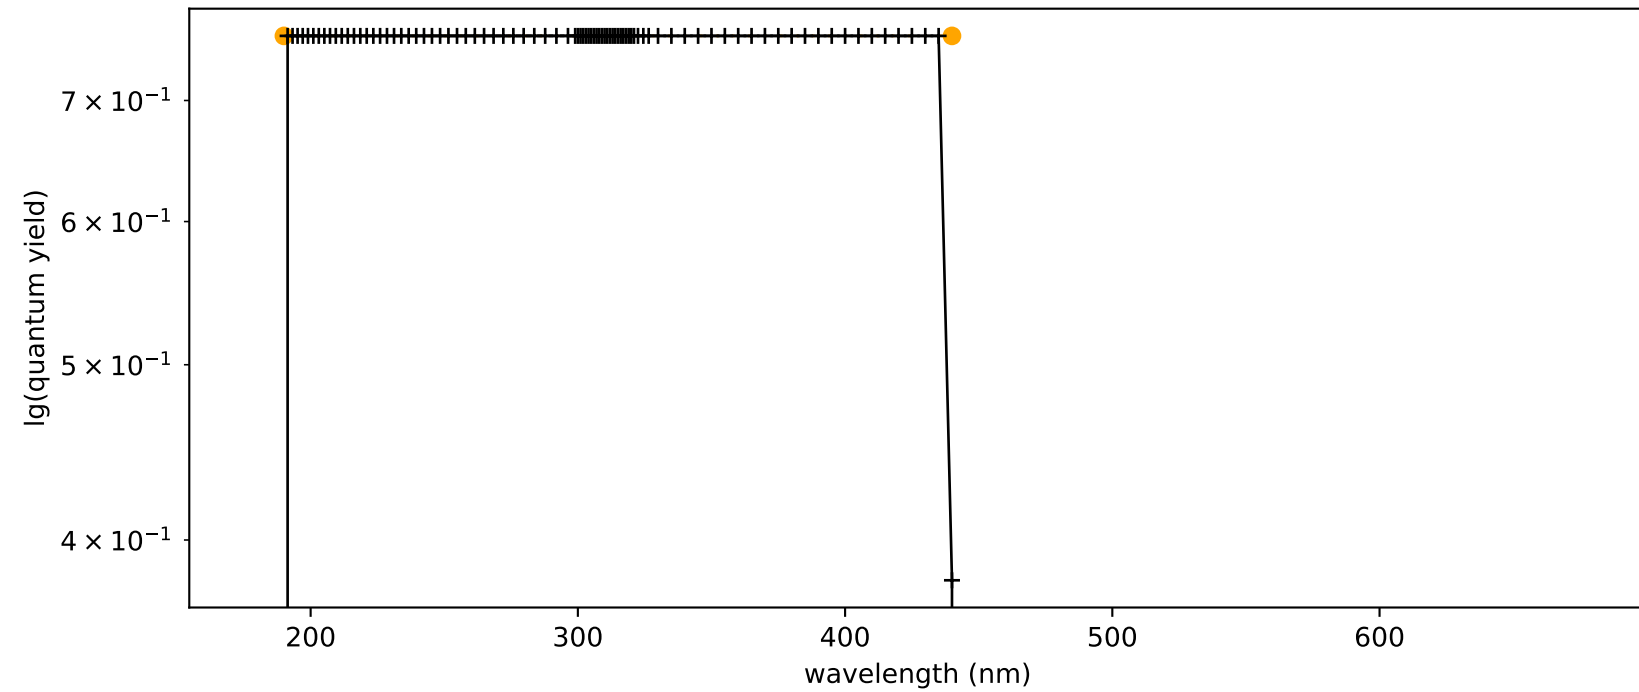

phi CHOH (linear)

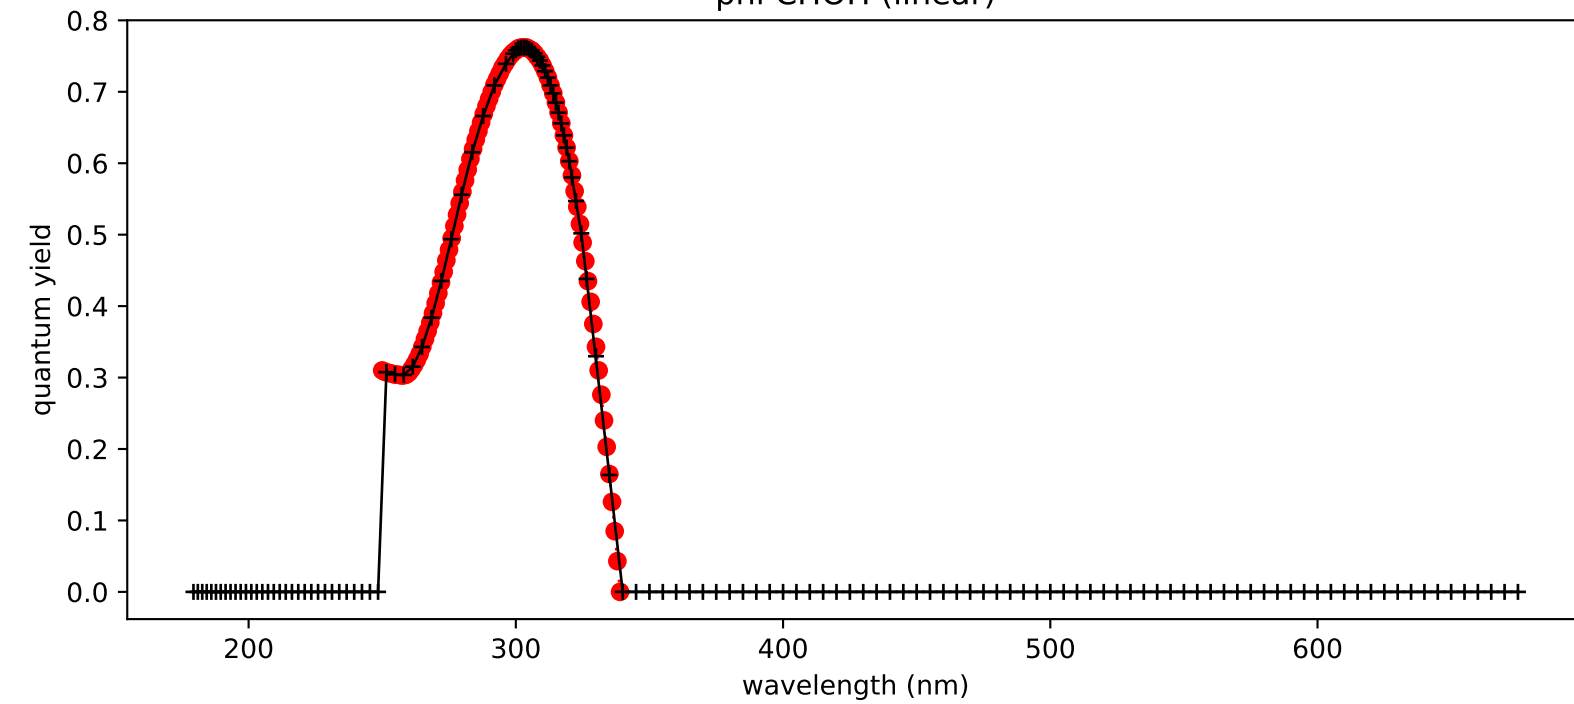

phi CHOH (log-scale)

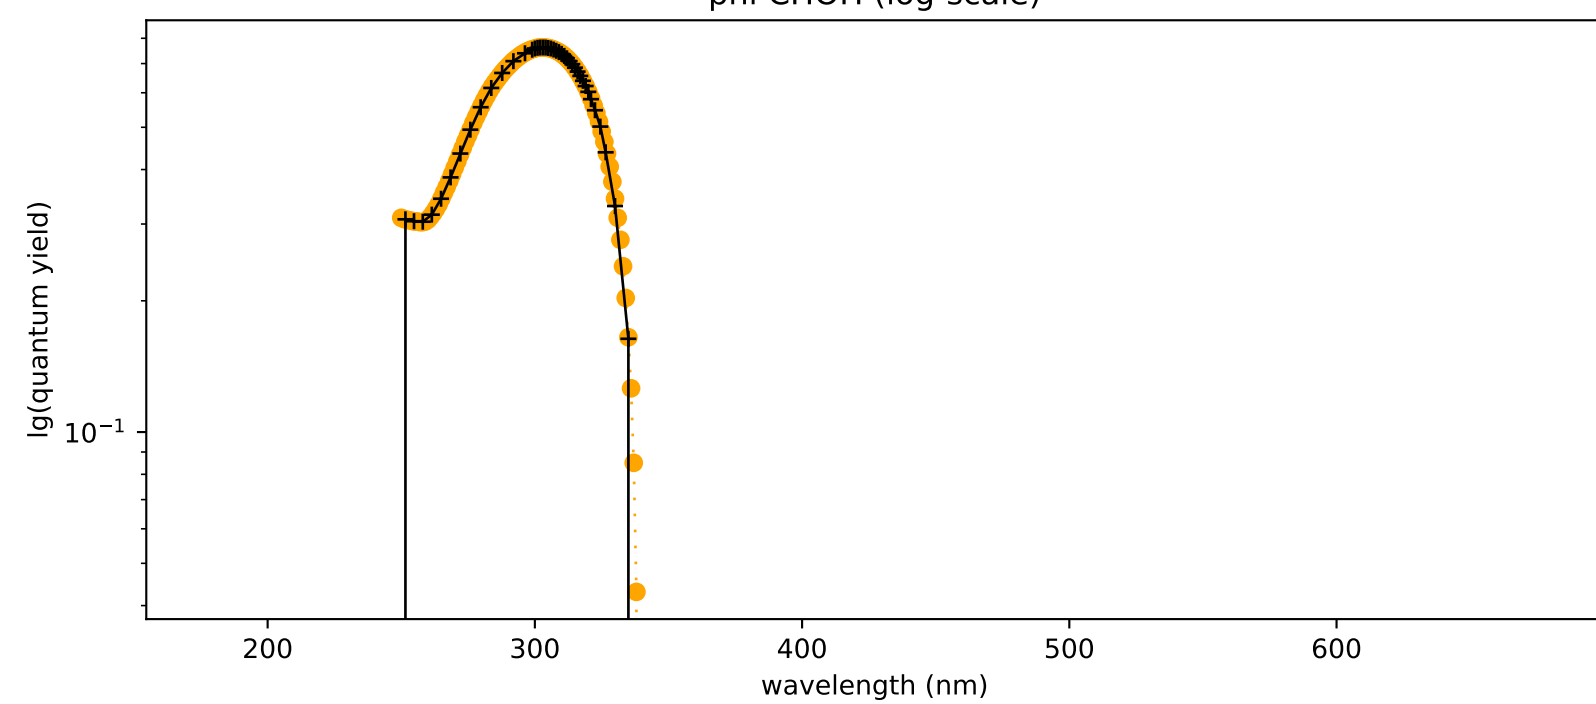

phi COH2 (linear)

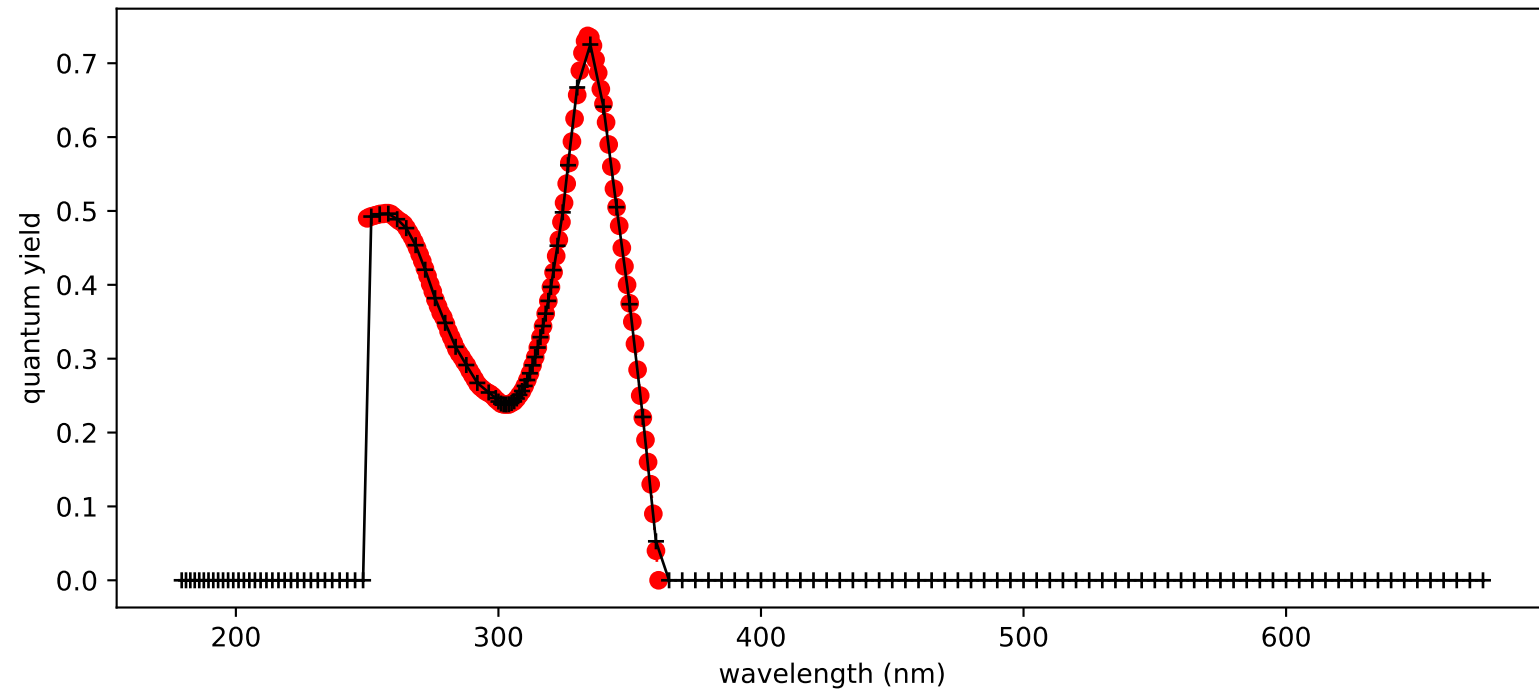

phi COH2 (log-scale)

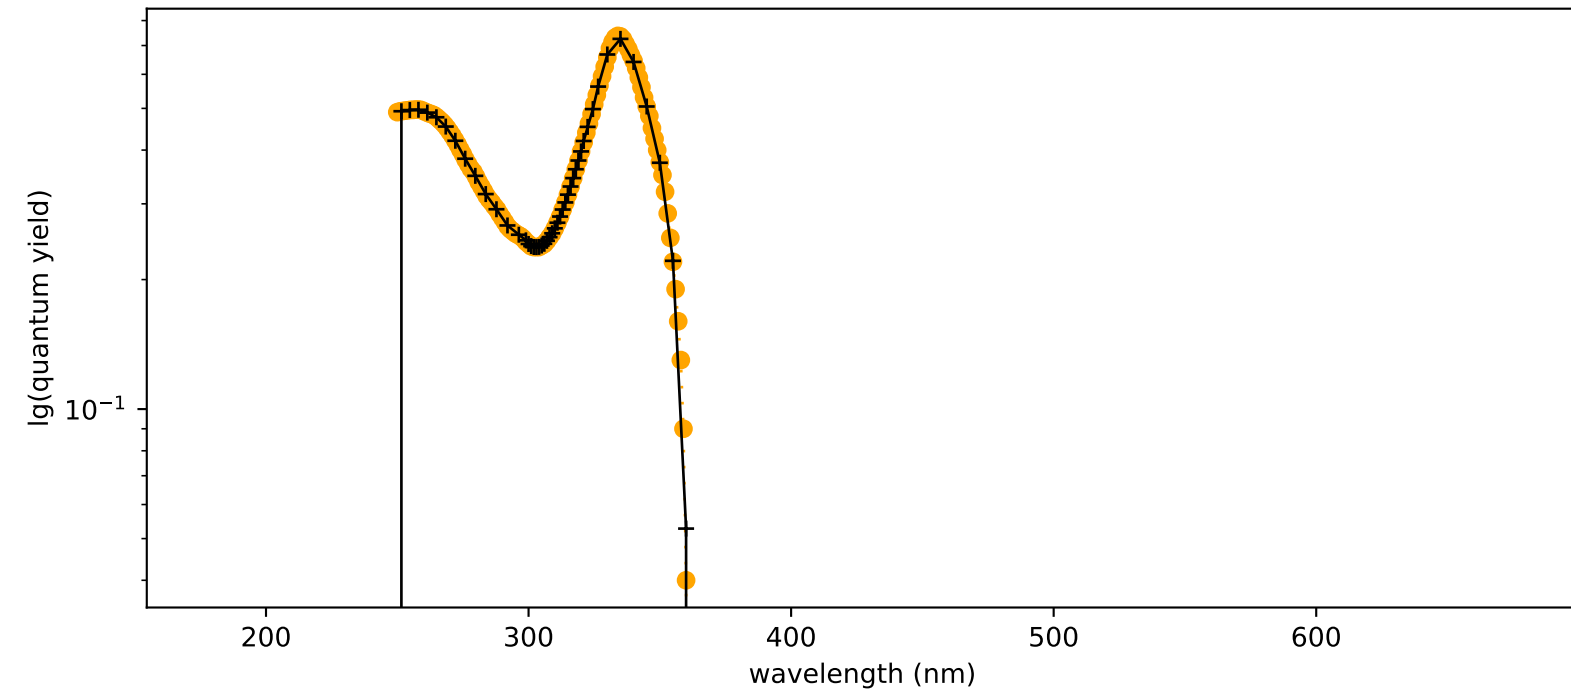

phi HOC6H4NO2 (linear)

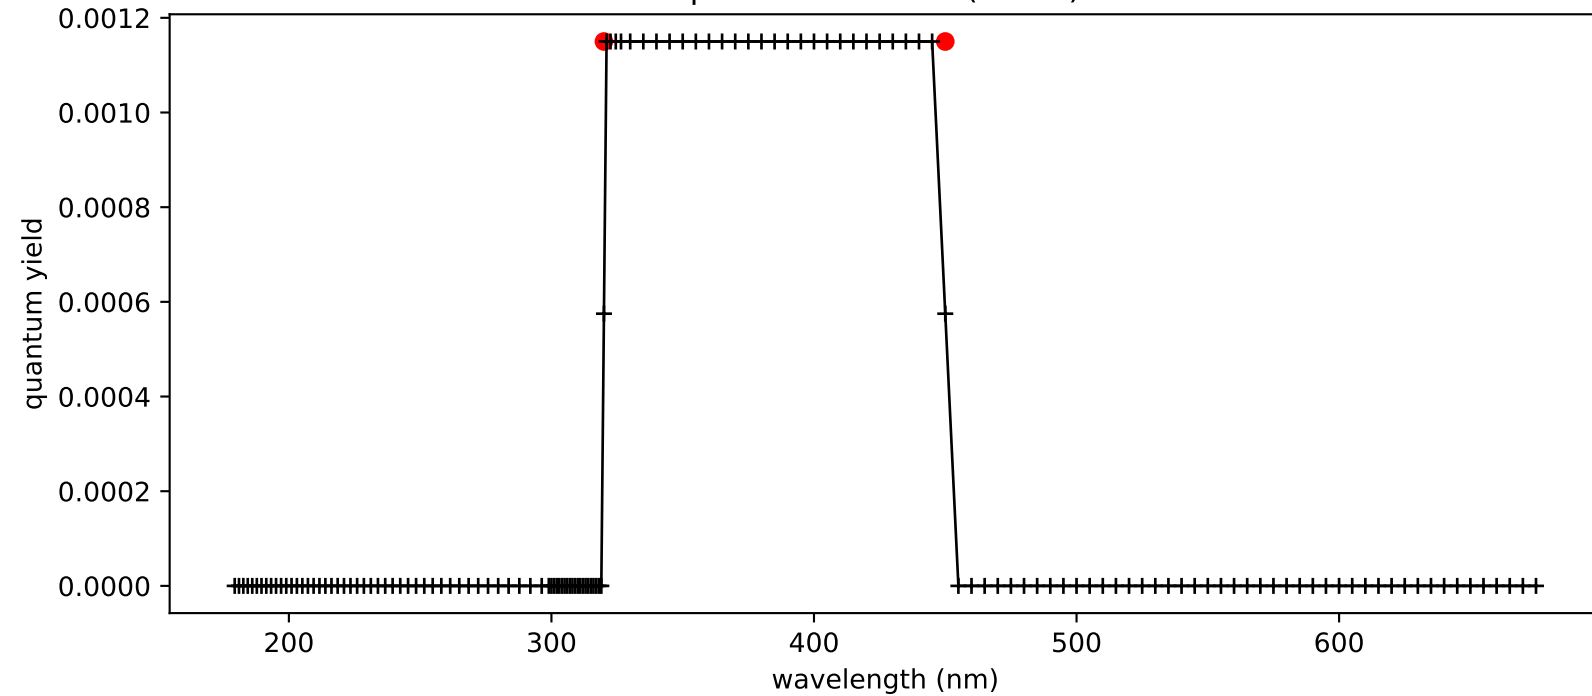

phi HOC6H4NO2 (log-scale)

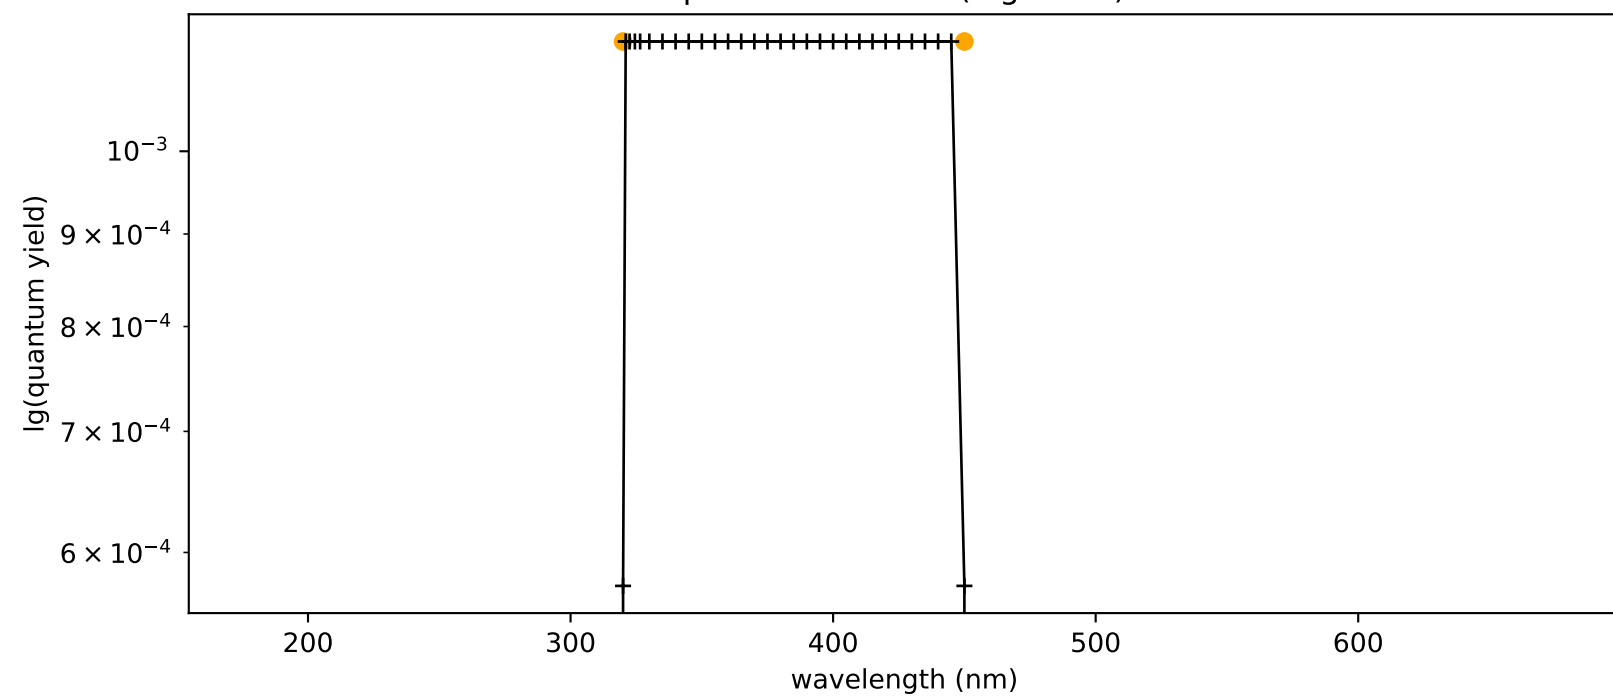

phi HOPh3Me2NO2 (linear)

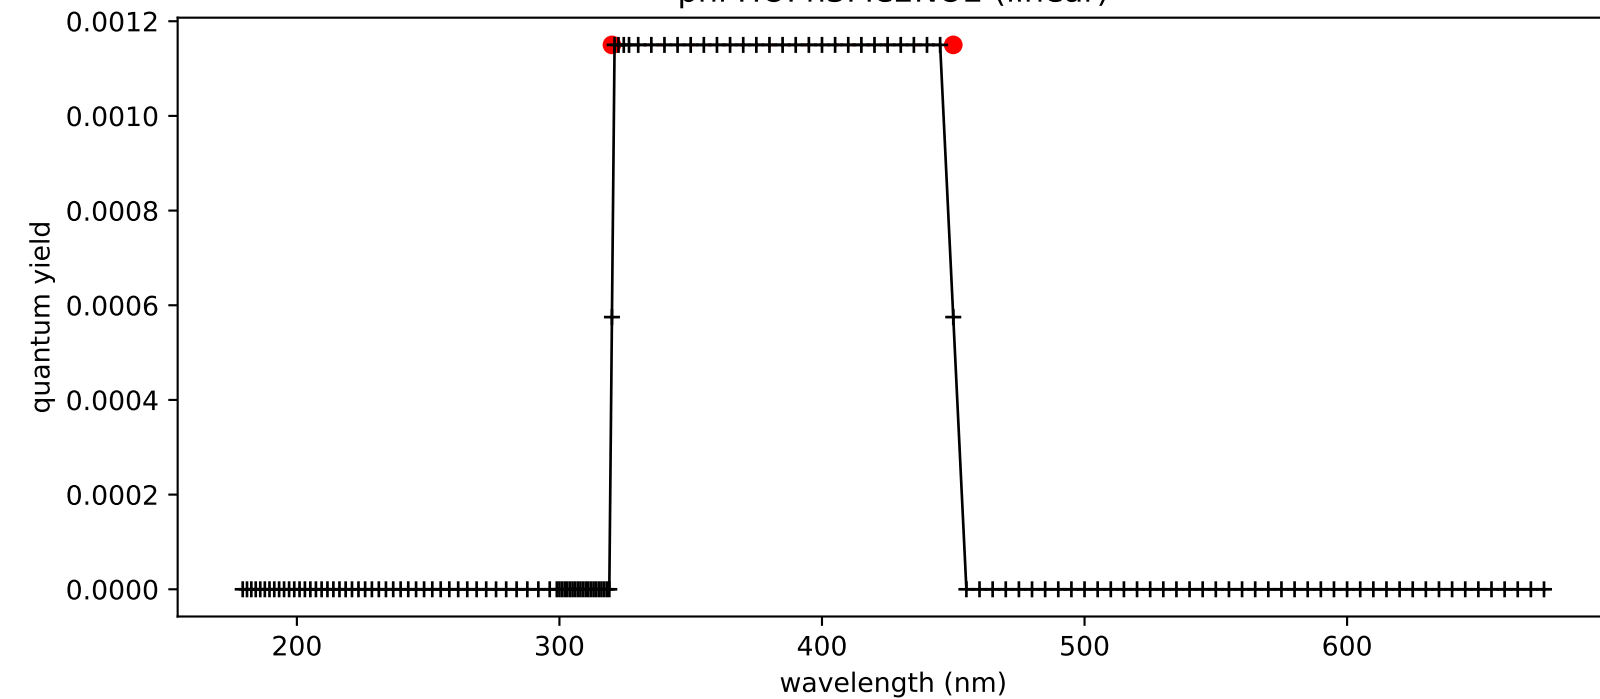

phi HOPh3Me2NO2 (log-scale)

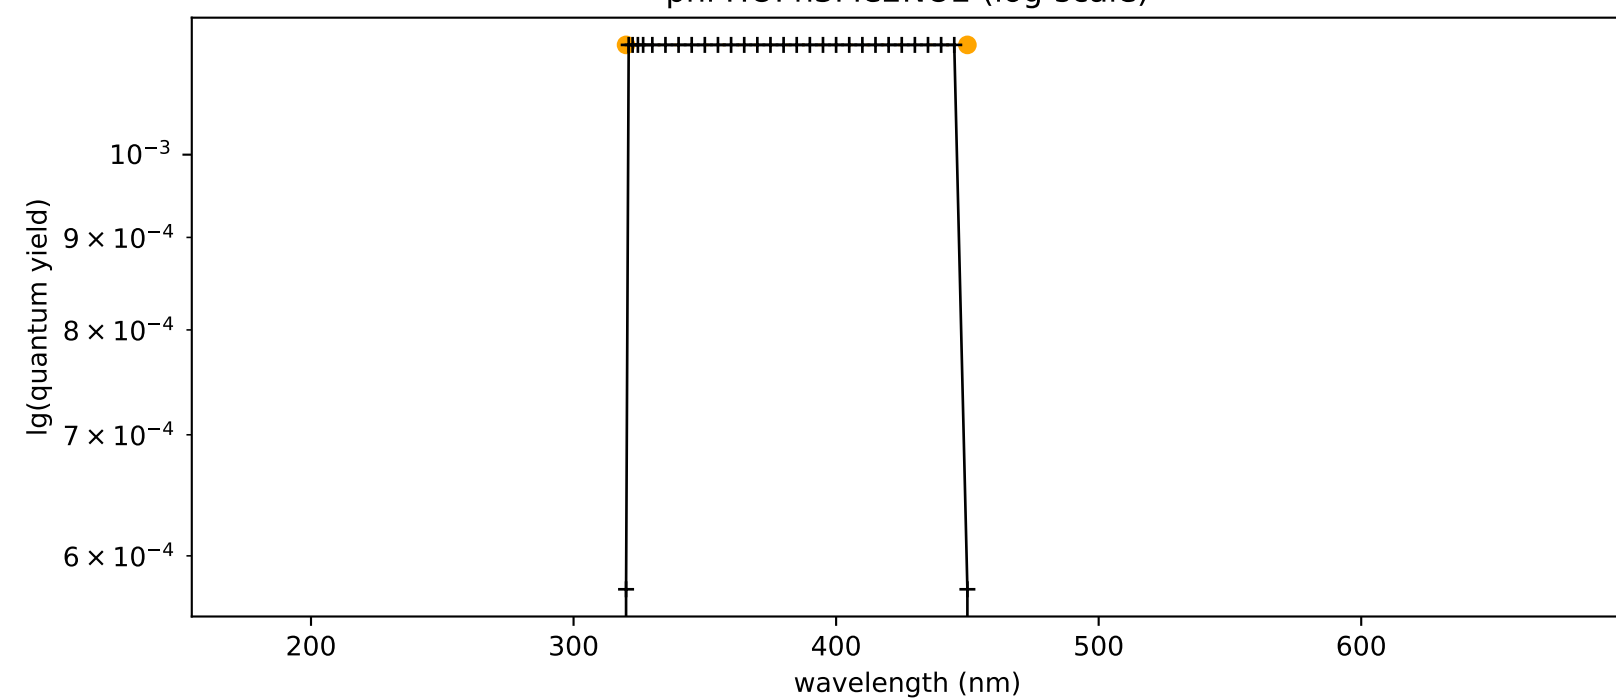

phi IPRCHO2HCO (linear)

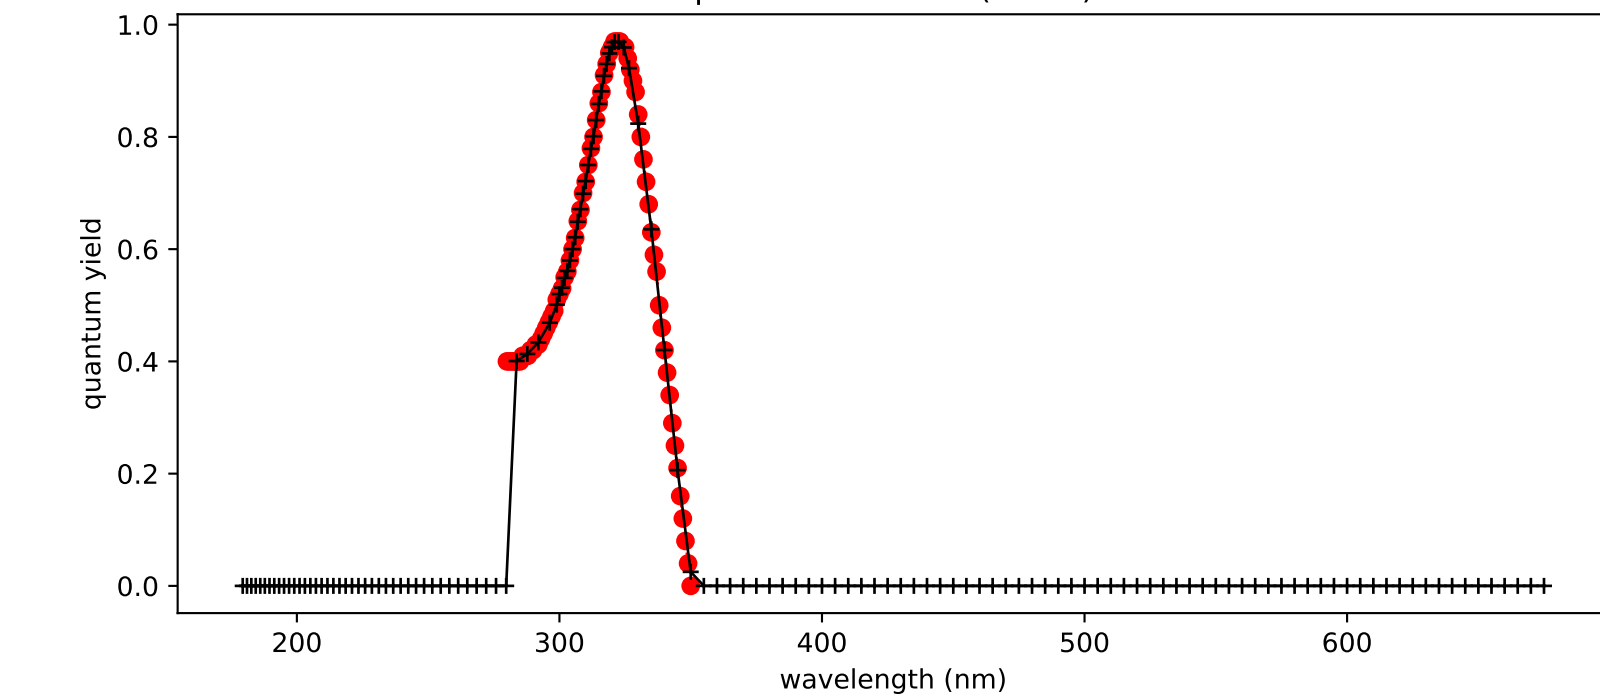

phi IPRCHO2HCO (log-scale)

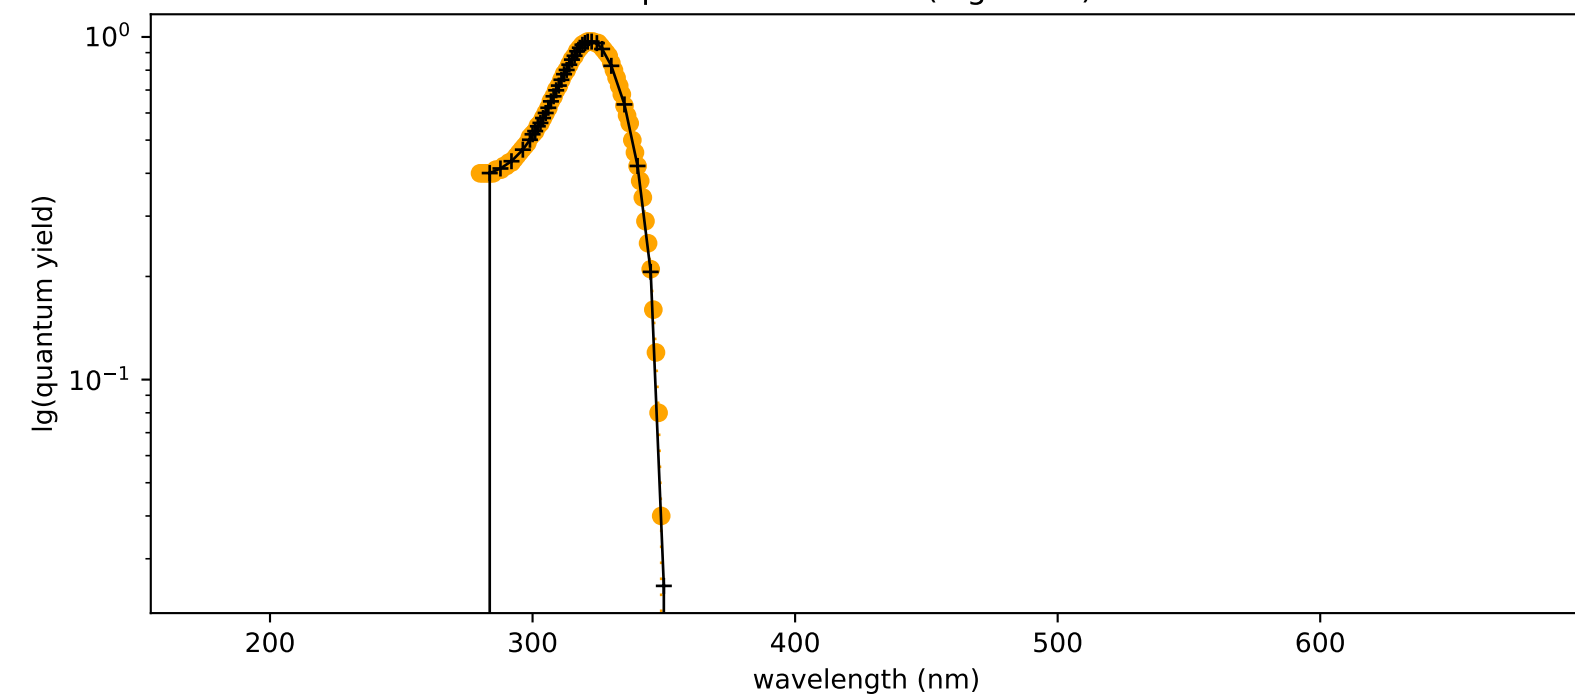

phi NO2 (linear)

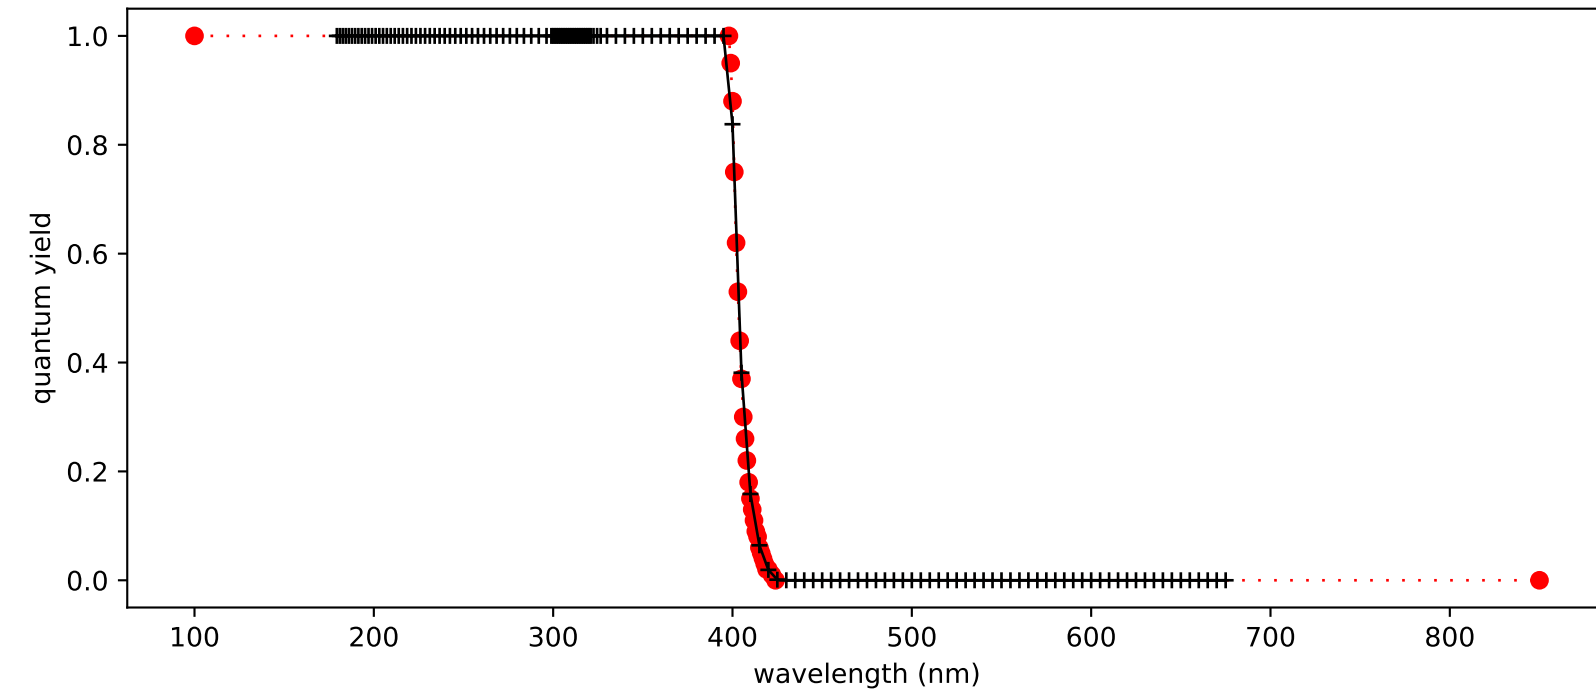

phi NO2 (log-scale)

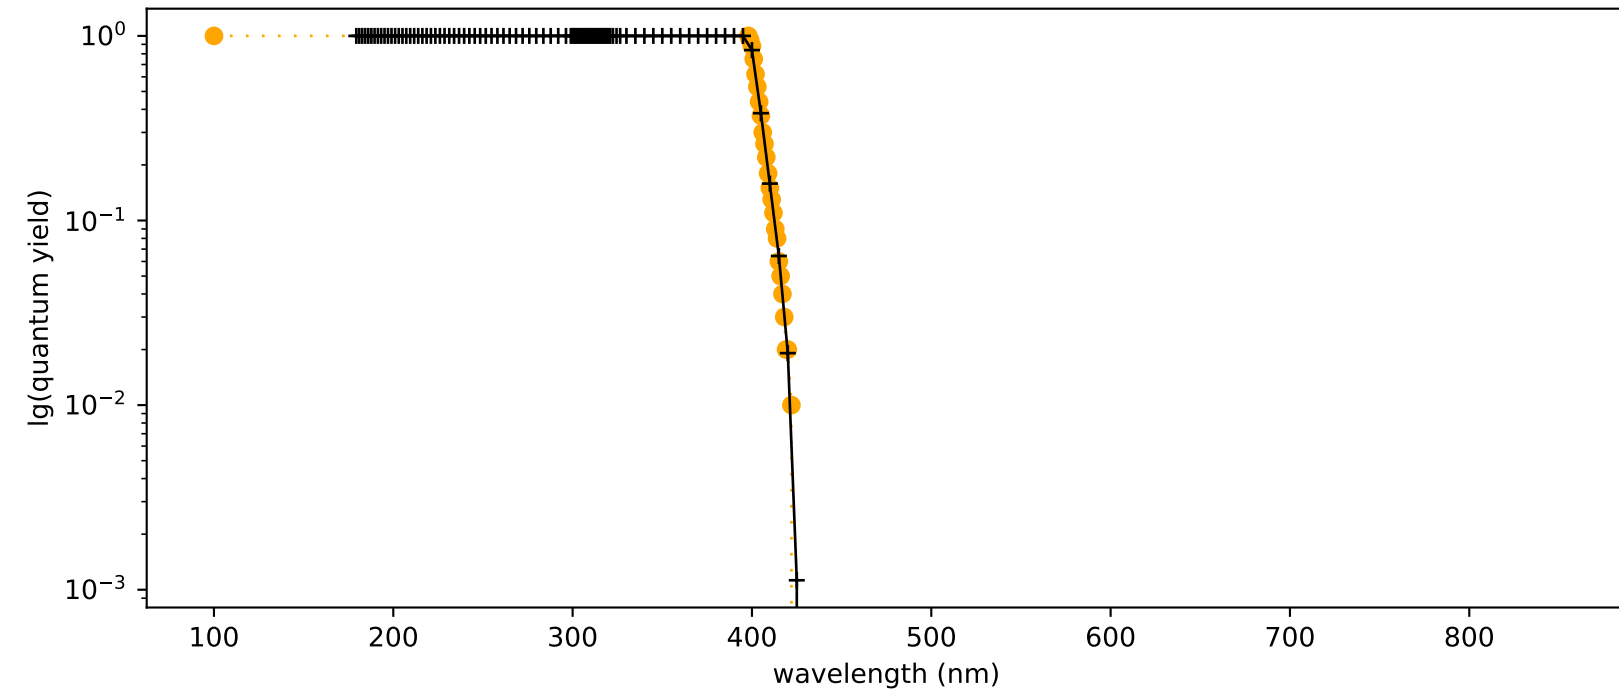

phi NO2O (linear)

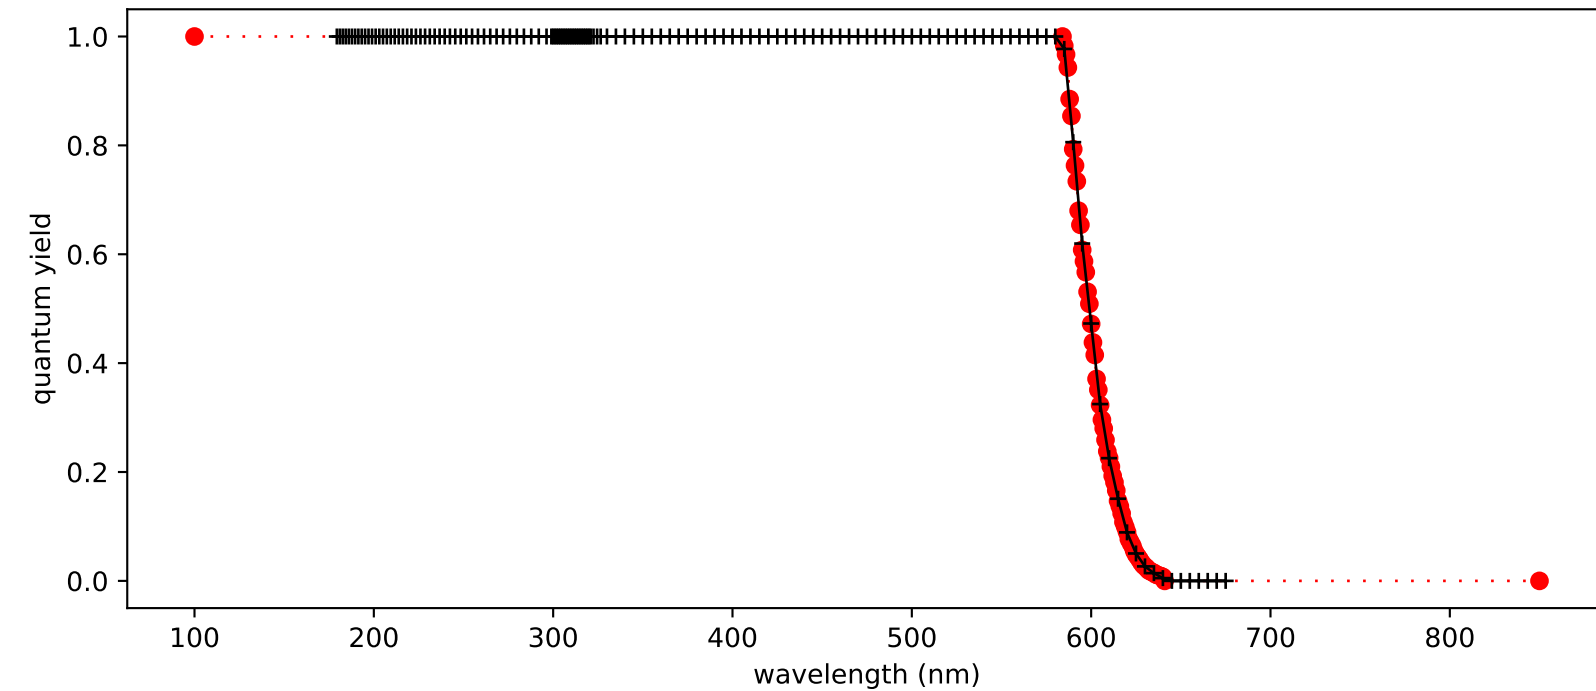

phi NO2O (log-scale)

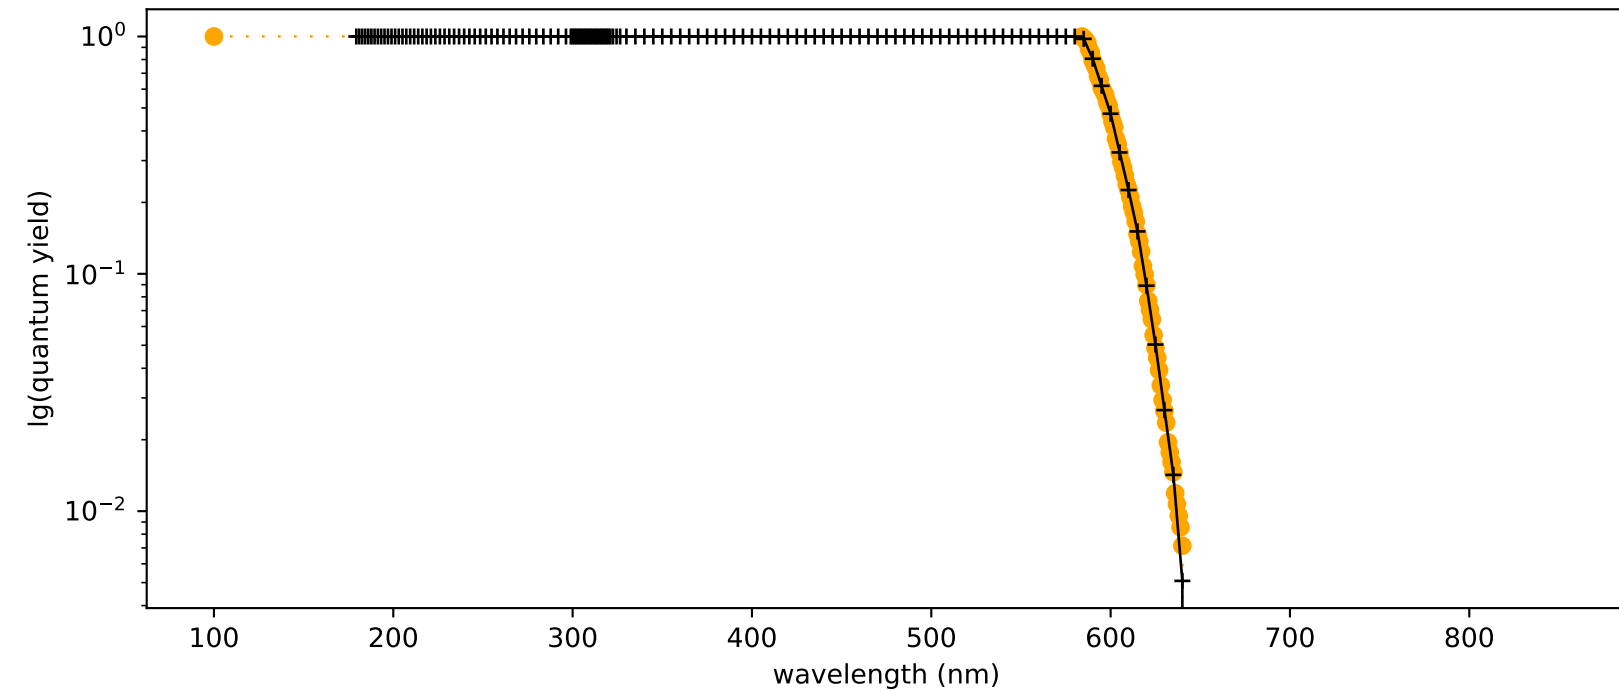

phi NOO2 (linear)

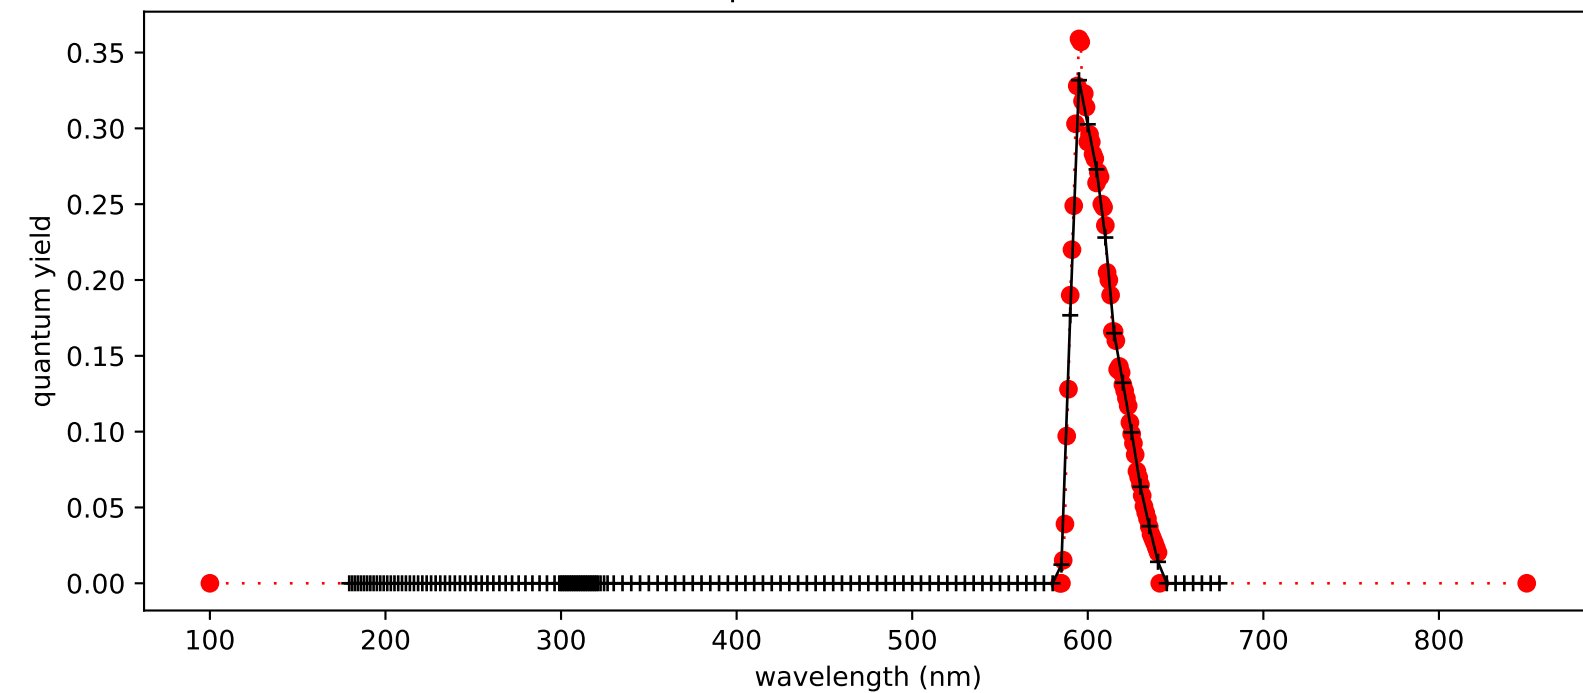

phi NOO2 (log-scale)

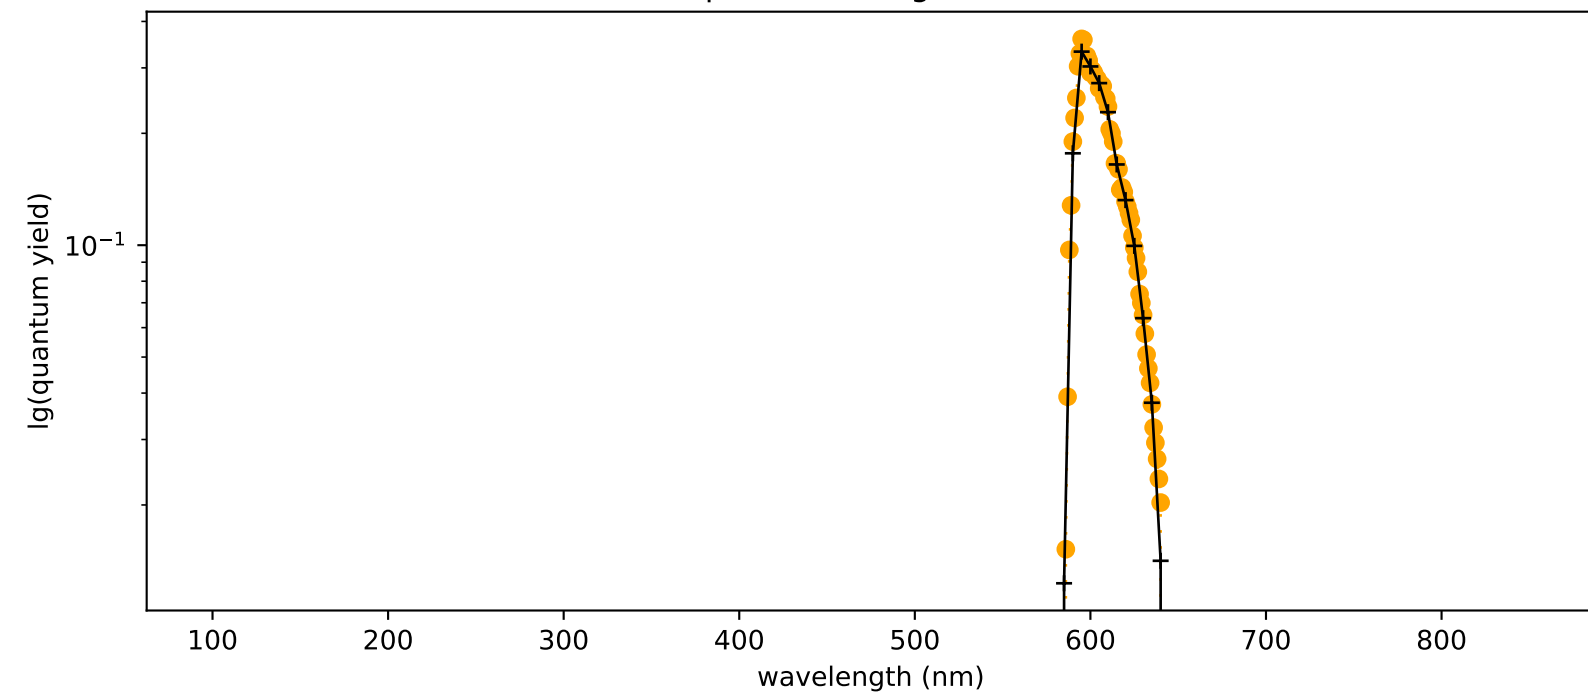

phi PINAL2ENOL (linear)

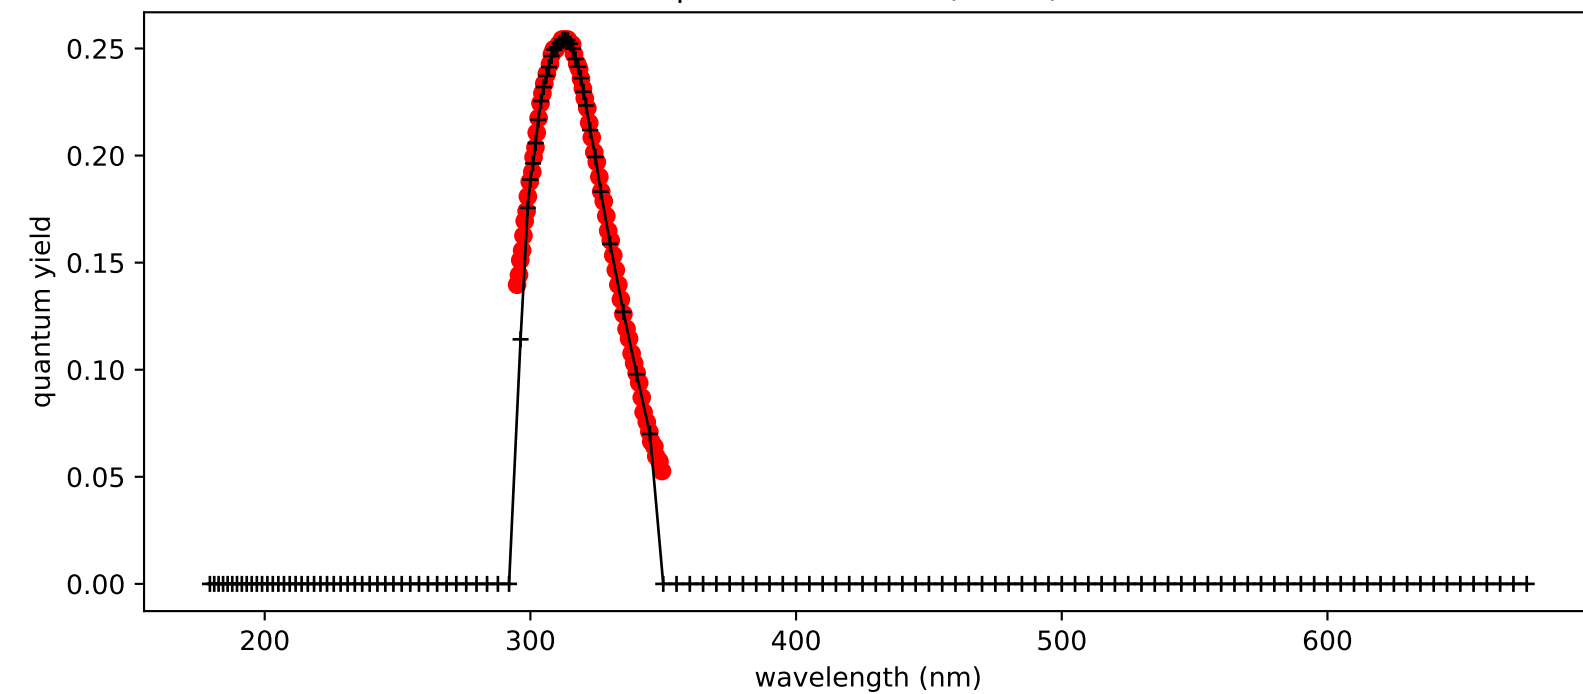

phi PINAL2ENOL (log-scale)

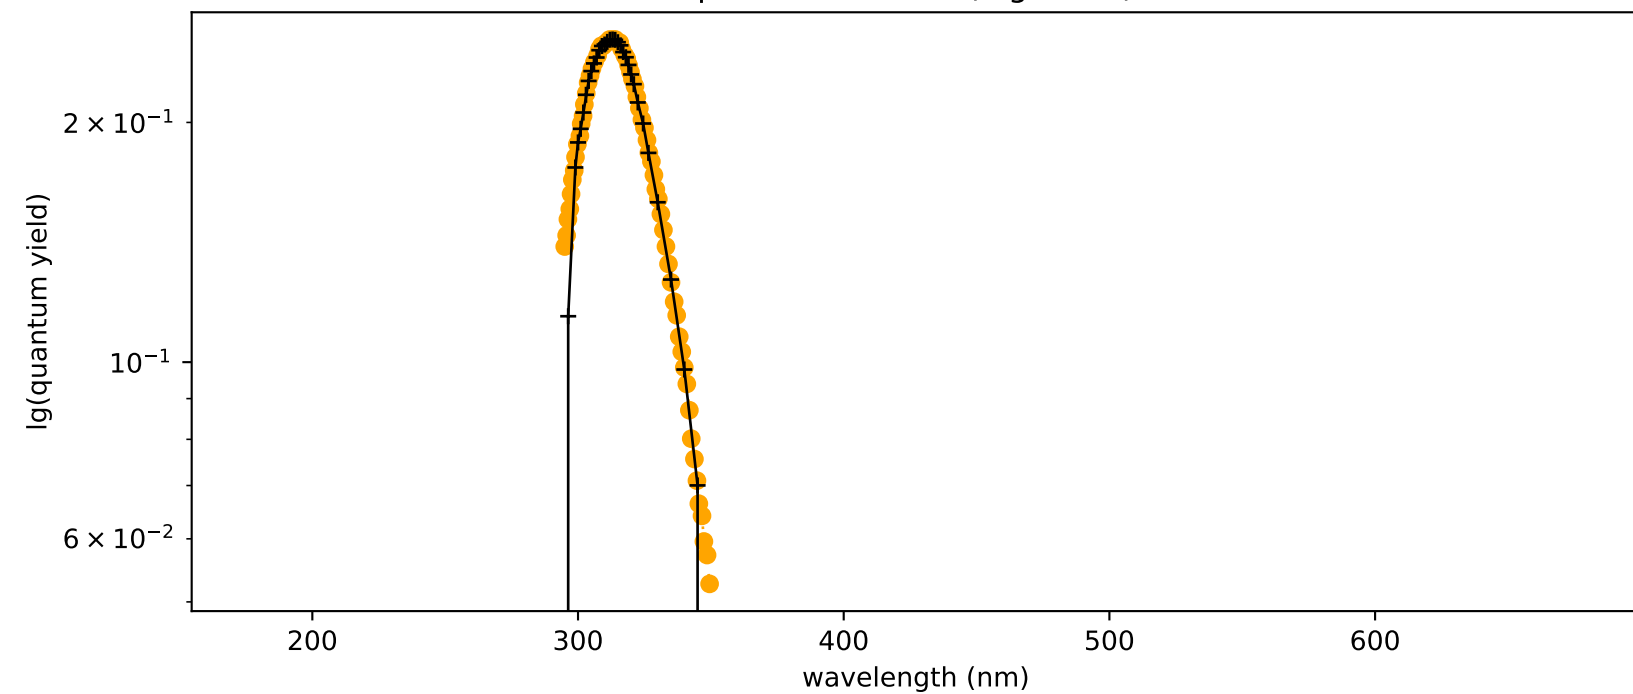

phi PINAL2HCO (linear)

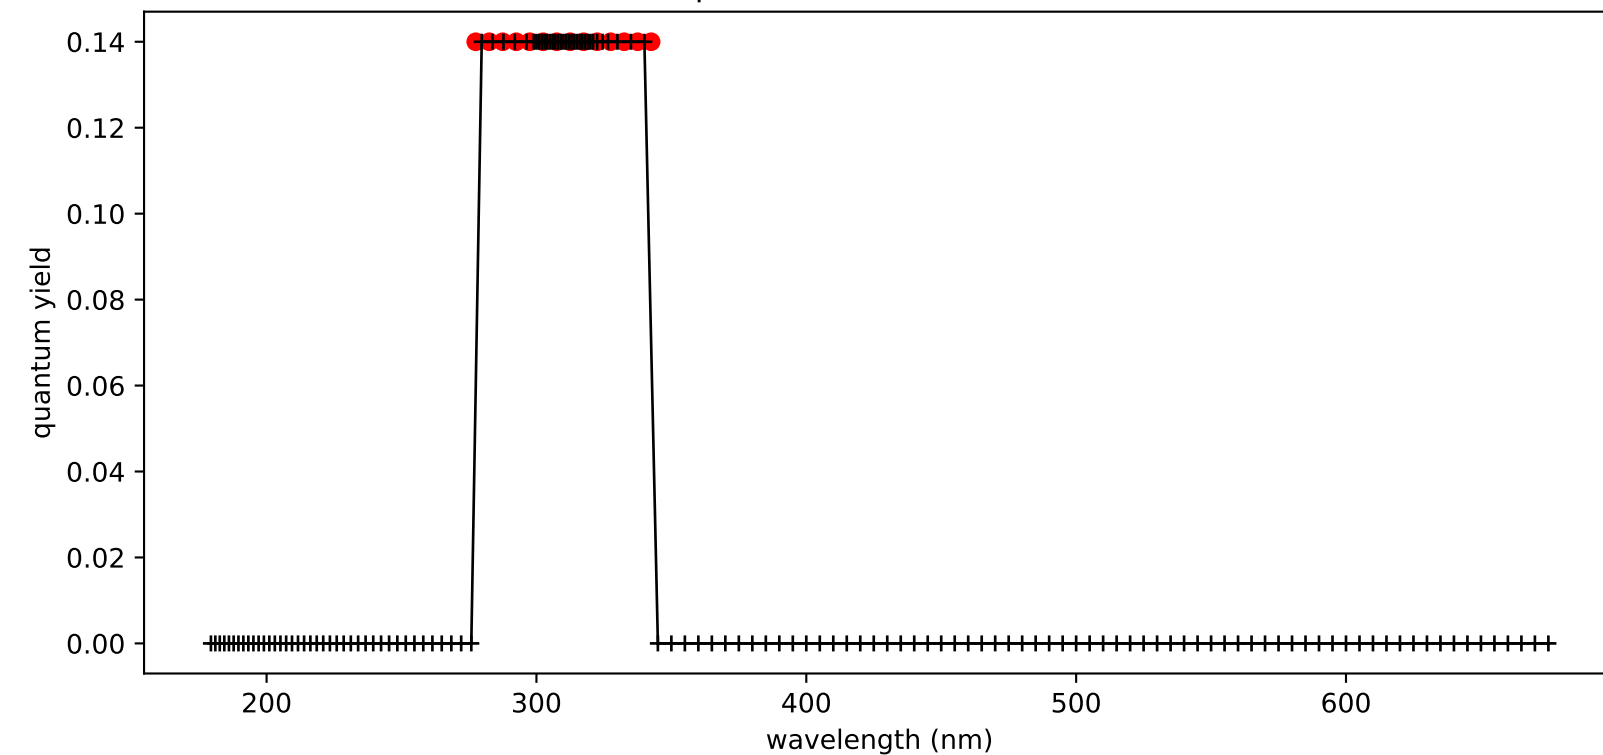

phi PINAL2HCO (log-scale)

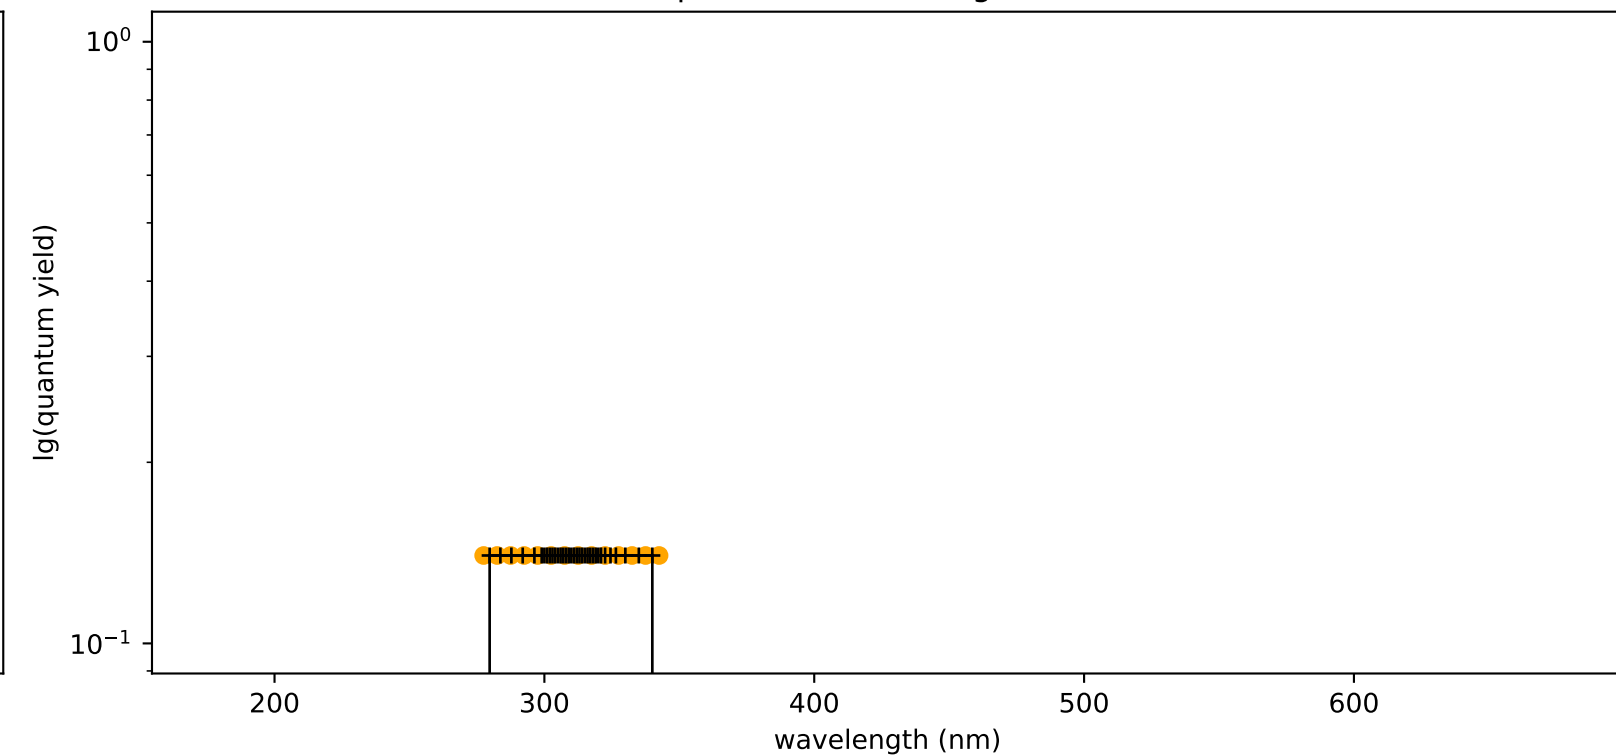

Supplement: Supplementary file 25 [file gmd-2020-337-supplement.zip]
