# Supplementary material for: Oxidation of low-molecular weight organic compounds in clouddroplets: development of the JAMOC chemical mechanism inCAABA/MECCA (version 4.5.0gmdd)
Source: Copernicus journal article supplement (doi:10.5194/gmd-2020-337), 2020-10-29
Supplement: Supplementary file 12 [file gmd-2020-337-supplement.zip]

Table 1: JVAL Photolysis reactions (version from September 15, 2020)

| #       | reaction                                                            | reference for spectrum                                                                                                                                                         |
|---------|---------------------------------------------------------------------|--------------------------------------------------------------------------------------------------------------------------------------------------------------------------------|
| J1000   | $\text{O}_2 \xrightarrow{h\nu} \text{O} + \text{O}$                 | Sander et al. (2011), Lyman-alpha from Chabrillat and Kockarts (1997) and Chabrillat and Kockarts (1998), Schumann-Runge band parameterization from Koppers and Murtagh (1996) |
| J1001b  | $\text{O}_3 \xrightarrow{h\nu} \text{O}(^3\text{P}) + \text{O}_2$   | Sander et al. (2011)                                                                                                                                                           |
| J1001a  | $\text{O}_3 \xrightarrow{h\nu} \text{O}(^1\text{D}) + \text{O}_2$   | Sander et al. (2011)                                                                                                                                                           |
| J2101   | $\text{H}_2\text{O}_2 \xrightarrow{h\nu} \text{OH} + \text{OH}$     | Sander et al. (2011)                                                                                                                                                           |
| J3101   | $\text{NO}_2 \xrightarrow{h\nu} \text{NO} + \text{O}$               | Sander et al. (2011)                                                                                                                                                           |
| J3103a  | $\text{NO}_3 \xrightarrow{h\nu} \text{NO}_2 + \text{O}$             | Sander et al. (2011)                                                                                                                                                           |
| J3103b  | $\text{NO}_3 \xrightarrow{h\nu} \text{NO} + \text{O}_2$             | Sander et al. (2011)                                                                                                                                                           |
| J3104   | $\text{N}_2\text{O}_5 \xrightarrow{h\nu} \text{NO}_2 + \text{NO}_3$ | Sander et al. (2011)                                                                                                                                                           |
| J3201   | $\text{HNO}_3 \xrightarrow{h\nu} \text{products}$                   | Sander et al. (2011)                                                                                                                                                           |
| J3202   | $\text{HNO}_4 \xrightarrow{h\nu} \text{products}$                   | Sander et al. (2011), IR overtones from Roehl et al. (2002)                                                                                                                    |
| J42004  | $\text{PAN} \xrightarrow{h\nu} \text{products}$                     | Sander et al. (2011)                                                                                                                                                           |
| J3200   | $\text{HONO} \xrightarrow{h\nu} \text{products}$                    | Sander et al. (2011)                                                                                                                                                           |
| J4100   | $\text{CH}_3\text{OOH} \xrightarrow{h\nu} \text{products}$          | Sander et al. (2011) up to 405 nm, Matthews et al. (2005) above 600 nm, zero in between                                                                                        |
| J41001a | $\text{HCHO} \xrightarrow{h\nu} \text{CO} + \text{H}_2$             | Sander et al. (2011), quantum yields at 300 K and 1 atm                                                                                                                        |
| J41001b | $\text{HCHO} \xrightarrow{h\nu} \text{CHO} + \text{H}$              | Sander et al. (2011), quantum yields at 300 K and 1 atm                                                                                                                        |
| J42002  | $\text{CH}_3\text{CO}_3\text{H} \xrightarrow{h\nu} \text{products}$ | Sander et al. (2011)                                                                                                                                                           |
| J42001a | $\text{CH}_3\text{CHO} \xrightarrow{h\nu} \text{CH}_3 + \text{CHO}$ | Sander et al. (2011)                                                                                                                                                           |
| J43001  | $\text{CH}_3\text{COCH}_3 \xrightarrow{h\nu} \text{products}$       | Hardcoded from old JVAL code. Pressure dependent.                                                                                                                              |
| J43003  | $\text{MGlyOX} \xrightarrow{h\nu} \text{products}$                  | Hardcoded from old JVAL code. Pressure dependent.                                                                                                                              |
| J6201   | $\text{HOCl} \xrightarrow{h\nu} \text{OH} + \text{Cl}$              | Sander et al. (2011)                                                                                                                                                           |
| J6101   | $\text{OCIO} \xrightarrow{h\nu} \text{products}$                    | Sander et al. (2011), value at 204 K                                                                                                                                           |
| J6100   | $\text{Cl}_2\text{O}_2 \xrightarrow{h\nu} \text{Cl} + \text{ClO}_2$ | Sander et al. (2011)                                                                                                                                                           |
| J6301a  | $\text{ClNO}_3 \xrightarrow{h\nu} \text{Cl} + \text{NO}_3$          | Sander et al. (2011)                                                                                                                                                           |
| J6300   | $\text{ClNO}_2 \xrightarrow{h\nu} \text{products}$                  | Ghosh et al. (2012)                                                                                                                                                            |
| J6000   | $\text{Cl}_2 \xrightarrow{h\nu} 2\text{Cl}$                         | Sander et al. (2011)                                                                                                                                                           |
| J7100   | $\text{BrO} \xrightarrow{h\nu} \text{Br} + \text{O}$                | Sander et al. (2011)                                                                                                                                                           |
| J7200   | $\text{HOBr} \xrightarrow{h\nu} \text{OH} + \text{Br}$              | Sander et al. (2011)                                                                                                                                                           |
| J7600   | $\text{BrCl} \xrightarrow{h\nu} \text{Br} + \text{Cl}$              | Sander et al. (2011), based on formula by Maric et al. (1994)                                                                                                                  |
| J7301   | $\text{BrNO}_3 \xrightarrow{h\nu} \text{products}$                  | Sander et al. (2011)                                                                                                                                                           |
| J7300   | $\text{BrNO}_2 \xrightarrow{h\nu} \text{products}$                  | Sander et al. (2011)                                                                                                                                                           |
| J7000   | $\text{Br}_2 \xrightarrow{h\nu} \text{products}$                    | Sander et al. (2011)                                                                                                                                                           |
| J6401   | $\text{CCl}_4 \xrightarrow{h\nu} \text{products}$                   | Sander et al. (2011)                                                                                                                                                           |
| J6400   | $\text{CH}_3\text{Cl} \xrightarrow{h\nu} \text{products}$           | Sander et al. (2011)                                                                                                                                                           |
| J6402   | $\text{CH}_3\text{CCl}_3 \xrightarrow{h\nu} \text{products}$        | Sander et al. (2011)                                                                                                                                                           |
| J6500   | $\text{CFCl}_3 \xrightarrow{h\nu} \text{products}$                  | Sander et al. (2011), formula for temperature-dependence from DeMore et al. (1997)                                                                                             |
| J6501   | $\text{CF}_2\text{Cl}_2 \xrightarrow{h\nu} \text{products}$         | Sander et al. (2011), formula for temperature-dependence from DeMore et al. (1997)                                                                                             |

Table 1: Photolysis reactions (... continued)

| #      | reaction                                                                    | reference for spectrum                                                                                       |
|--------|-----------------------------------------------------------------------------|--------------------------------------------------------------------------------------------------------------|
| J7400  | $\text{CH}_3\text{Br} \xrightarrow{h\nu} \text{products}$                   | Sander et al. (2011)                                                                                         |
| J7601  | $\text{CF}_2\text{ClBr} \xrightarrow{h\nu} \text{products}$                 | Sander et al. (2011)                                                                                         |
| J7500  | $\text{CF}_3\text{Br} \xrightarrow{h\nu} \text{products}$                   | Sander et al. (2011)                                                                                         |
| J8401  | $\text{CH}_3\text{I} \xrightarrow{h\nu} \text{products}$                    | Sander et al. (2011), using data at 298 K, temperature dependence not considered                             |
| J8402  | $\text{C}_3\text{H}_7\text{I} \xrightarrow{h\nu} \text{products}$           | Sander et al. (2011)                                                                                         |
| J8403  | $\text{CH}_2\text{ClI} \xrightarrow{h\nu} \text{products}$                  | Sander et al. (2011), using data for 298 K, temperature dependence not considered                            |
| J8400  | $\text{CH}_2\text{I}_2 \xrightarrow{h\nu} \text{products}$                  | Sander et al. (2011), using data for 298 K, temperature dependence not considered                            |
| J8100  | $\text{IO} \xrightarrow{h\nu} \text{I} + \text{O}$                          | Sander et al. (2011)                                                                                         |
| J8200  | $\text{HOI} \xrightarrow{h\nu} \text{products}$                             | Sander et al. (2011)                                                                                         |
| J8000  | $\text{I}_2 \xrightarrow{h\nu} 2\text{I}$                                   | Keller-Rudek et al. (2013), based on Sander et al. (2006)                                                    |
| J8600  | $\text{ICl} \xrightarrow{h\nu} \text{products}$                             | Sander et al. (2011), values shown as “< 1” in their Table 4H-10 were set to 0                               |
| J8700  | $\text{IBr} \xrightarrow{h\nu} \text{products}$                             | Sander et al. (2011)                                                                                         |
| J8300  | $\text{INO}_2 \xrightarrow{h\nu} \text{products}$                           | Sander et al. (2011)                                                                                         |
| J8301  | $\text{INO}_3 \xrightarrow{h\nu} \text{products}$                           | Sander et al. (2011)                                                                                         |
|        | $\text{SO}_2 \xrightarrow{h\nu} \text{SO}_2^*$                              | Danielache et al. (2008), quantum yield for dissociation is unknown.                                         |
|        | $\text{SO}_3 \xrightarrow{h\nu} \text{products}$                            | Sander et al. (2011)                                                                                         |
| J9000  | $\text{OCS} \xrightarrow{h\nu} \text{products}$                             | Sander et al. (2011)                                                                                         |
| J2100  | $\text{H}_2\text{O} \xrightarrow{h\nu} \text{H} + \text{OH}$                | Sander et al. (2011)                                                                                         |
| J3100  | $\text{N}_2\text{O} \xrightarrow{h\nu} \text{N}_2 + \text{O}(^1\text{D})$   | Sander et al. (2011)                                                                                         |
| J3102  | $\text{NO} \xrightarrow{h\nu} \text{N} + \text{O}$                          | Hardcoded from old JVAL code.                                                                                |
| J41002 | $\text{CO}_2 \xrightarrow{h\nu} \text{CO} + \text{O}$                       | Shemansky (1972), Lyman-alpha from Inn et al. (1953)                                                         |
| J6200  | $\text{HCl} \xrightarrow{h\nu} \text{H} + \text{Cl}$                        | Sander et al. (2011)                                                                                         |
| J7603  | $\text{CHCl}_2\text{Br} \xrightarrow{h\nu} \text{products}$                 | Sander et al. (2011)                                                                                         |
| J7604  | $\text{CHClBr}_2 \xrightarrow{h\nu} \text{products}$                        | Sander et al. (2011)                                                                                         |
| J7602  | $\text{CH}_2\text{ClBr} \xrightarrow{h\nu} \text{products}$                 | Sander et al. (2011)                                                                                         |
| J7401  | $\text{CH}_2\text{Br}_2 \xrightarrow{h\nu} \text{products}$                 | Sander et al. (2011)                                                                                         |
| J7402  | $\text{CHBr}_3 \xrightarrow{h\nu} \text{products}$                          | Sander et al. (2011), formula for temperature-dependence not only used for 290-340 nm but also for > 340 nm. |
| J9002  | $\text{SF}_6 \xrightarrow{h\nu} \text{products}$                            | Lyman-alpha from Ravishankara et al. (1993)                                                                  |
| J6301b | $\text{ClNO}_3 \xrightarrow{h\nu} \text{ClO} + \text{NO}_2$                 | Sander et al. (2011)                                                                                         |
| J44008 | $\text{MACR} \xrightarrow{h\nu} \text{products}$                            | Hardcoded from old JVAL code. Pressure dependent.                                                            |
| J44001 | $\text{MVK} \xrightarrow{h\nu} \text{products}$                             | Hardcoded from old JVAL code. Pressure dependent.                                                            |
| J42008 | $\text{CHOCHO} \xrightarrow{h\nu} 2\text{CHO}$                              | Hardcoded from old JVAL code. Pressure dependent.                                                            |
| J42005 | $\text{HOCH}_2\text{CHO} \xrightarrow{h\nu} \text{products}$                | Sander et al. (2011)                                                                                         |
| J41003 | $\text{CH}_4 \xrightarrow{h\nu} \text{products}$                            | Lyman-alpha from Fig. 1 of Turco (1975)                                                                      |
|        | $\text{H}_2\text{SO}_4 \xrightarrow{h\nu} \text{SO}_3 + \text{H}_2\text{O}$ | Hardcoded from old JVAL code.                                                                                |
|        | $\text{C}_3\text{O}_2 \xrightarrow{h\nu} \text{products}$                   | Stephan Kessel, pers. comm.                                                                                  |
| J41005 | $\text{CH}_3\text{NO}_3 \xrightarrow{h\nu} \text{products}$                 | Sander et al. (2011)                                                                                         |

Table 1: Photolysis reactions (... continued)

| #         | reaction                                                                                                         | reference for spectrum                                           |
|-----------|------------------------------------------------------------------------------------------------------------------|------------------------------------------------------------------|
| J41006    | $\text{CH}_3\text{O}_2\text{NO}_2 \xrightarrow{h\nu} \text{products}$                                            | Atkinson et al. (2006)                                           |
| J41004    | $\text{CH}_3\text{ONO} \xrightarrow{h\nu} \text{products}$                                                       | Sander et al. (2011), using $\varphi = 0.76$ for all wavelengths |
| J41008    | $\text{CH}_3\text{O}_2 \xrightarrow{h\nu} \text{products}$                                                       | Sander et al. (2011)                                             |
| J41009    | $\text{HCOOH} \xrightarrow{h\nu} \text{products}$                                                                | Sander et al. (2011)                                             |
| J6500dc01 | $\text{CHF}_2\text{Cl} \xrightarrow{h\nu} \text{products}$                                                       | Sander et al. (2011)                                             |
| J42019    | $\text{C}_2\text{H}_5\text{NO}_3 \xrightarrow{h\nu} \text{products}$                                             | Atkinson et al. (2006)                                           |
| J43007    | $\text{NOA} \xrightarrow{h\nu} \text{products}$                                                                  | Barnes et al. (1993)                                             |
| J44025    | $3\text{-nitrooxy-2-butanone} \xrightarrow{h\nu} \text{products}$                                                | Barnes et al. (1993)                                             |
| J47403    | $\text{BENZAL} \xrightarrow{h\nu} \text{HCO} + \text{C}_6\text{H}_5$                                             | Wallington et al. (2018)                                         |
|           | $3\text{-Me-2-nitrophenol} \xrightarrow{h\nu} \text{HONO} + \text{products}$                                     | Chen et al. (2011)                                               |
| J46405    | $2\text{-nitrophenol} \xrightarrow{h\nu} \text{HONO} + \text{products}$                                          | Chen et al. (2011)                                               |
| J42001b   | $\text{CH}_3\text{CHO} \xrightarrow{h\nu} \text{CH}_2=\text{CHOH}$                                               | Andrews et al. (2012)                                            |
| J43018    | $\text{CH}_3\text{COCO}_2\text{H} \xrightarrow{h\nu} \text{products}$                                            | Sander et al. (2011)                                             |
| J44038    | $(\text{CH}_3)_2\text{CHCHO} \xrightarrow{h\nu} (\text{CH}_3)_2\text{CH} + \text{CHO}$                           | Allan et al. (2007)                                              |
| J43025a   | $\text{CH}_3\text{CH}_2\text{CHO} \xrightarrow{h\nu} \text{CH}_3\text{CH}_2 + \text{CHO}$                        | Allan et al. (2007)                                              |
| J43025b   | $\text{CH}_3\text{CH}_2\text{CHO} \xrightarrow{h\nu} \text{CH}_3\text{CHCHOH}$                                   | Zhou et al. (2008)                                               |
| J44037a   | $\text{CH}_3\text{CH}_2\text{CH}_2\text{CHO} \xrightarrow{h\nu} \text{CH}_3\text{CH}_2\text{CH}_2 + \text{CHO}$  | Allan et al. (2007)                                              |
| J44037b   | $\text{CH}_3\text{CH}_2\text{CH}_2\text{CHO} \xrightarrow{h\nu} \text{CH}_2\text{CH}_2 + \text{CH}_2\text{CHOH}$ | Zhou et al. (2008)                                               |
|           | $2,4\text{-pentanedione} \xrightarrow{h\nu} \text{products}$                                                     | Messaadia et al. (2015)                                          |
| J40203a   | $\text{PINAL} \xrightarrow{h\nu} \text{C96O2} + \text{CHO}$                                                      | Allan et al. (2007)                                              |
| J40203b   | $\text{PINAL} \xrightarrow{h\nu} \text{PINENOL}$                                                                 | Andrews et al. (2012)                                            |
| J6500dc02 | $\text{CF}_2\text{ClCFCl}_2 \xrightarrow{h\nu} \text{products}$                                                  | Sander et al. (2011)                                             |
| J6500dc03 | $\text{CH}_3\text{CFCl}_2 \xrightarrow{h\nu} \text{products}$                                                    | Sander et al. (2011)                                             |
| J6500dc05 | $\text{CF}_3\text{CF}_2\text{Cl} \xrightarrow{h\nu} \text{products}$                                             | Sander et al. (2011)                                             |
| J6500dc04 | $\text{CF}_2\text{ClCF}_2\text{Cl} \xrightarrow{h\nu} \text{products}$                                           | Sander et al. (2011)                                             |
| J6400dc02 | $\text{CHCl}_3 \xrightarrow{h\nu} \text{products}$                                                               | Sander et al. (2011)                                             |
| J6400dc01 | $\text{CH}_2\text{Cl}_2 \xrightarrow{h\nu} \text{products}$                                                      | Sander et al. (2011)                                             |
|           | $\text{HO}_2 \xrightarrow{h\nu} \text{OH} + \text{O3P}$                                                          | Sander et al. (2011)                                             |
|           | $\text{ClO} \xrightarrow{h\nu} \text{O3P} + \text{Cl}$                                                           | Sander et al. (2011)                                             |
| J42022    | $\text{HOCCOOH} \xrightarrow{h\nu} \text{CO}_2 + 0.72\text{HCOOH} + 0.28\text{CO} + 0.28\text{H}_2\text{O}$      |                                                                  |

## References

- Allan, W., Struthers, H., and Lowe, D. C.: Methane carbon isotope effects caused by atomic chlorine in the marine boundary layer: Global model results compared with Southern Hemisphere measurements, *J. Geophys. Res.*, 112D, D04306, doi:10.1029/2006JD007369, 2007.
- Andrews, D. U., Heazlewood, B. R., Maccarone, A. T., Conroy, T., Payne, R. J., Jordan, M. J. T., and Kable, S. H.: Photo-  
tautomerization of acetaldehyde to vinyl alcohol: a potential route to tropospheric acids, *Science*, 337, 1203–1206, doi:10.1126/science.1220712, 2012.
- Atkinson, R., Baulch, D. L., Cox, R. A., Crowley, J. N., Hampson, R. F., Hynes, R. G., Jenkin, M. E., Rossi, M. J., Troe, J., and IUPAC Subcommittee: Evaluated kinetic and photochemical data for atmospheric chemistry: Volume II – gas phase reactions of organic species, *Atmos. Chem. Phys.*, 6, 3625–4055, doi:10.5194/ACP-6-3625-2006, 2006.
- Barnes, I., Becker, K. H., and Zhu, T.: Near UV absorption-spectra and photolysis products of difunctional organic nitrates – possible importance as NO<sub>x</sub> reservoirs, *J. Atmos. Chem.*, 17, 353–373, doi:10.1007/BF00696854, 1993.
- Chabrilat, S. and Kockarts, G.: Simple parameterization of the absorption of the solar Lyman-alpha line, *Geophys. Res. Lett.*, 24, 2659–2662, doi:10.1029/97GL52690, 1997.
- Chabrilat, S. and Kockarts, G.: Correction to “Simple parameterization of the absorption of the solar Lyman-alpha line”, *Geophys. Res. Lett.*, 25, 79, doi:10.1029/97GL03569, 1998.
- Chen, J., Wenger, J. C., and Venables, D. S.: Near-ultraviolet absorption cross sections of nitrophenols and their potential influence on tropospheric oxidation capacity, *J. Phys. Chem. A*, 115, 12 235–12 242, doi:10.1021/jp206929r, 2011.
- Danielache, S. O., Eskebjerg, C., Johnson, M. S., Ueno, Y., and Yoshida, N.: High-precision spectroscopy of <sup>32</sup>S, <sup>33</sup>S, and <sup>34</sup>S sulfur dioxide: Ultraviolet absorption cross sections and isotope effects, *J. Geophys. Res.*, 113D, D17314, doi:10.1029/2007JD009695, 2008.
- DeMore, W. B., Sander, S. P., Golden, D. M., Hampson, R. F., Kurylo, M. J., Howard, C. J., Ravishankara, A. R., Kolb, C. E., and Molina, M. J.: Chemical kinetics and photochemical data for use in stratospheric modeling. Evaluation number 12, JPL Publication 97-4, Jet Propulsion Laboratory, Pasadena, CA, 1997.
- Ghosh, B., Papanastasiou, D. K., Talukdar, R. K., Roberts, J. M., and Burkholder, J. B.: Nitryl chloride (ClNO<sub>2</sub>): UV/Vis absorption spectrum between 210 and 296 K and O(<sup>3</sup>P) quantum yield at 193 and 248 nm, *J. Phys. Chem. A*, 116, 5796–5805, doi:10.1021/JP207389Y, 2012.
- Inn, E. C. Y., Watanabe, K., and Zelikoff, M.: Absorption coefficients of gases in the vacuum ultraviolet. Part III. CO<sub>2</sub>, *J. Chem. Phys.*, 21, 1648–1650, doi:10.1063/1.1698637, 1953.
- Keller-Rudek, H., Moortgat, G. K., Sander, R., and Sørensen, R.: The MPI-Mainz UV/VIS spectral atlas of gaseous molecules of atmospheric interest, *Earth Syst. Sci. Data*, 5, 365–373, doi:10.5194/ESSD-5-365-2013, 2013.
- Koppers, G. A. A. and Murtagh, D. P.: Model studies of the influence of O<sub>2</sub> photodissociation parameterizations in the Schumann-Runge bands on ozone related photolysis in the upper atmosphere, *Ann. Geophys.*, 14, 68–79, 1996.
- Maric, D., Burrows, J. P., and Moortgat, G. K.: A study of the UV-visible absorption spectra of Br<sub>2</sub> and BrCl, *J. Photochem. Photobiol. A: Chem.*, 83, 179–192, doi:10.1016/1010-6030(94)03823-6, 1994.
- Matthews, J., Sinha, A., and Francisco, J. S.: The importance of weak absorption features in promoting tropospheric radical production, *Proc. Natl. Acad. Sci. USA*, 102, 7449–7452, doi:10.1073/PNAS.0502687102, 2005.
- Messaadia, L., Dib, G. E., Ferhati, A., and Chakir, A.: UV-visible spectra and gas-phase rate coefficients for the reaction of 2,3-pentanedione and 2,4-pentanedione with OH radicals, *Chem. Phys. Lett.*, 626, 73–79, doi:10.1016/j.cplett.2015.02.032, 2015.
- Ravishankara, A. R., Solomon, S., Turnipseed, A. A., and Warren, R. F.: Atmospheric lifetimes of long-lived halogenated species, *Science*, 259, 194–199, doi:10.1126/SCIENCE.259.5092.194, 1993.
- Roehl, C. M., Nizkorodov, S. A., Zhang, H., Blake, G. A., and Wennberg, P. O.: Photodissociation of peroxyxynitric acid in the near-IR, *J. Phys. Chem. A*, 106, 3766–3772, doi:10.1021/JP013536V, 2002.
- Sander, S. P., Friedl, R. R., Golden, D. M., Kurylo, M. J., Moortgat, G. K., Keller-Rudek, H., Wine, P. H., Ravishankara, A. R., Kolb, C. E., Molina, M. J., Finlayson-Pitts, B. J., Huie, R. E., and Orkin, V. L.: Chemical Kinetics and Photochemical Data for Use in Atmospheric Studies, Evaluation Number 15, JPL Publication 06-2, Jet Propulsion Laboratory, Pasadena, CA, <http://jpldataeval.jpl.nasa.gov>, 2006.

- Sander, S. P., Abbatt, J., Barker, J. R., Burkholder, J. B., Friedl, R. R., Golden, D. M., Huie, R. E., Kolb, C. E., Kurylo, M. J., Moortgat, G. K., Orkin, V. L., and Wine, P. H.: Chemical Kinetics and Photochemical Data for Use in Atmospheric Studies, Evaluation No. 17, JPL Publication 10-6, Jet Propulsion Laboratory, Pasadena, <http://jpldataeval.jpl.nasa.gov>, 2011.
- Shemansky, D. E.: CO<sub>2</sub> extinction coefficient 1700–3000 Å, J. Chem. Phys., 56, 1582–1587, doi:10.1063/1.1677408, 1972.
- Turco, R. P.: Photodissociation rates in the atmosphere below 100 km, Geophys. Surv., 2, 153–192, doi:10.1007/BF01447907, 1975.
- Wallington, T. J., Ammann, M., Cox, R. A., Crowley, J. N., Herrmann, H., Jenkin, M. E., McNeill, V., Mellouki, A., Rossi, M. J., and Troe, J.: IUPAC Task group on atmospheric chemical kinetic data evaluation: Evaluated kinetic data, <http://iupac.pole-ether.fr>, 2018.
- Zhou, X., Davis, A. J., Kieber, D. J., Keene, W. C., Maben, J. R., Maring, H., Dahl, E. E., Izaguirre, M. A., Sander, R., and Smoydzin, L.: Photochemical production of hydroxyl radical and hydroperoxides in water extracts of nascent marine aerosols produced by bursting bubbles from Sargasso seawater, Geophys. Res. Lett., 35, L20803, doi:10.1029/2008GL035418, 2008.
