# Supplementary material for: Oxidation of low-molecular weight organic compounds in clouddroplets: development of the JAMOC chemical mechanism inCAABA/MECCA (version 4.5.0gmdd)
Source: Copernicus journal article supplement (doi:10.5194/gmd-2020-337), 2020-10-29
Supplement: Supplementary file 20 [file gmd-2020-337-supplement.zip]

Archive with 1,514 entries (1,429 files):
- caaba_4.5.0gmdd/
- caaba_4.5.0gmdd/messy_jval_box.f90
- caaba_4.5.0gmdd/caaba.nml
- caaba_4.5.0gmdd/_update_internal_links.tcsh
- caaba_4.5.0gmdd/messy_cloudj_fjx_sub_mod.f90
- caaba_4.5.0gmdd/jnl/
- caaba_4.5.0gmdd/jnl/henry_equil.jnl
- caaba_4.5.0gmdd/jnl/montecarlo.jnl
- caaba_4.5.0gmdd/jnl/xxxa.jnl
- caaba_4.5.0gmdd/jnl/jval-cloudj.jnl
- caaba_4.5.0gmdd/jnl/cims_vs_caaba.jnl
- caaba_4.5.0gmdd/jnl/jval-sappho.jnl
- caaba_4.5.0gmdd/jnl/_myrxnrates.jnl
- caaba_4.5.0gmdd/jnl/rxnrates_scaled.jnl
- caaba_4.5.0gmdd/jnl/jval.jnl
- caaba_4.5.0gmdd/jnl/_acidbase_equil_0d_a02.jnl
- caaba_4.5.0gmdd/jnl/_plot_rxnrates_scaled.jnl
- caaba_4.5.0gmdd/jnl/fe_caaba.jnl
- caaba_4.5.0gmdd/jnl/messy.jnl
- caaba_4.5.0gmdd/jnl/_acidbase_equil2_0d_a02.jnl
- caaba_4.5.0gmdd/jnl/README
- caaba_4.5.0gmdd/jnl/sizebins.jnl
- caaba_4.5.0gmdd/jnl/_mecca_spc.jnl
- caaba_4.5.0gmdd/jnl/csv2nc_FeClO3.jnl
- caaba_4.5.0gmdd/jnl/acidbase_equil_0d.jnl
- caaba_4.5.0gmdd/jnl/scatterplot_mc.jnl
- caaba_4.5.0gmdd/jnl/setmodelrun.jnl
- caaba_4.5.0gmdd/jnl/_henry_equil_0d.jnl
- caaba_4.5.0gmdd/jnl/_plot_rxnrates.jnl
- caaba_4.5.0gmdd/jnl/_acidbase_equil2_0d_a01.jnl
- caaba_4.5.0gmdd/jnl/_families_a.jnl
- caaba_4.5.0gmdd/jnl/xxxg.jnl
- caaba_4.5.0gmdd/jnl/photo.jnl
- caaba_4.5.0gmdd/jnl/_acidbase_equil_0d_a01.jnl
- caaba_4.5.0gmdd/jnl/rxnrates.jnl
- caaba_4.5.0gmdd/jnl/tools/
- caaba_4.5.0gmdd/jnl/tools/psmerge
- caaba_4.5.0gmdd/jnl/tools/exitviewport.jnl
- caaba_4.5.0gmdd/jnl/tools/_findrange_sizebins.jnl
- caaba_4.5.0gmdd/jnl/tools/initialize.jnl
- caaba_4.5.0gmdd/jnl/tools/median.jnl
- caaba_4.5.0gmdd/jnl/tools/frequency_histogram_rs.jnl
- caaba_4.5.0gmdd/jnl/tools/README
- caaba_4.5.0gmdd/jnl/tools/nextviewport.jnl
- caaba_4.5.0gmdd/jnl/tools/bar_chart3_rs.jnl
- caaba_4.5.0gmdd/jnl/tools/bar_chart2_rs.jnl
- caaba_4.5.0gmdd/jnl/tools/_kppvarrates.jnl
- caaba_4.5.0gmdd/jnl/tools/_plot_sizebins.jnl
- caaba_4.5.0gmdd/jnl/tools/regresst_rs.jnl
- caaba_4.5.0gmdd/jnl/tools/ppl_mylayout.jnl
- caaba_4.5.0gmdd/jnl/tools/newpage.jnl
- caaba_4.5.0gmdd/jnl/tools/_define_sensi.jnl
- caaba_4.5.0gmdd/jnl/tools/double_line_widths
- caaba_4.5.0gmdd/jnl/tools/initviewport.jnl
- caaba_4.5.0gmdd/jnl/tools/plt_mergeto_pdf
- caaba_4.5.0gmdd/jnl/tools/_plot_0d.jnl
- caaba_4.5.0gmdd/jnl/tools/_findrange.jnl
- caaba_4.5.0gmdd/jnl/tools/_plot_1d.jnl
- caaba_4.5.0gmdd/jnl/tools/_plot_2d.jnl
- caaba_4.5.0gmdd/ini/
- caaba_4.5.0gmdd/ini/caaba_multirun.ini
- caaba_4.5.0gmdd/ini/caaba_ovoc.ini
- caaba_4.5.0gmdd/ini/caaba_example.ini
- caaba_4.5.0gmdd/ini/caaba_montecarlo.ini
- caaba_4.5.0gmdd/messy_dissoc_box.f90
- caaba_4.5.0gmdd/caabaplot.py
- caaba_4.5.0gmdd/skeleton/
- caaba_4.5.0gmdd/skeleton/drgep.f90
- caaba_4.5.0gmdd/skeleton/samplepoints/
- caaba_4.5.0gmdd/skeleton/samplepoints/skeleton_samplepoints_small.txt
- caaba_4.5.0gmdd/skeleton/samplepoints/skeleton_samplepoints_30.pdf
- caaba_4.5.0gmdd/skeleton/samplepoints/skeleton_samplepoints_30_loworg.pdf
- caaba_4.5.0gmdd/skeleton/samplepoints/skeleton_samplepoints_small.nc
- caaba_4.5.0gmdd/skeleton/samplepoints/skeleton_samplepoints_mbl.nc
- caaba_4.5.0gmdd/skeleton/samplepoints/txt2nc.py
- caaba_4.5.0gmdd/skeleton/samplepoints/skeleton_samplepoints_30.nc
- caaba_4.5.0gmdd/skeleton/samplepoints/skeleton_samplepoints_30_loworg.nc
- caaba_4.5.0gmdd/skeleton/samplepoints/levels.txt
- caaba_4.5.0gmdd/skeleton/samplepoints/extract_samplepoints.py
- caaba_4.5.0gmdd/skeleton/samplepoints/targets.txt
- caaba_4.5.0gmdd/skeleton/samplepoints/plot_samplepoints.py
- caaba_4.5.0gmdd/skeleton/xskeleton.py
- caaba_4.5.0gmdd/skeleton/EQN_NAMES.dat
- caaba_4.5.0gmdd/skeleton/messy_mecca_kpp_function.f90
- caaba_4.5.0gmdd/skeleton/messy_mecca_kpp_parameters.f90
- caaba_4.5.0gmdd/skeleton/OIC.dat
- caaba_4.5.0gmdd/skeleton/sfmakedepend
- caaba_4.5.0gmdd/skeleton/Makefile
- caaba_4.5.0gmdd/skeleton/messy_mecca_kpp_monitor.f90
- caaba_4.5.0gmdd/skeleton/README
- caaba_4.5.0gmdd/skeleton/messy_main_constants_mem.f90
- caaba_4.5.0gmdd/skeleton/StoichNum.dat
- caaba_4.5.0gmdd/skeleton/EQN_TAGS.dat
- caaba_4.5.0gmdd/skeleton/ctrl/
- caaba_4.5.0gmdd/skeleton/ctrl/simple_organic.py
- caaba_4.5.0gmdd/skeleton/ctrl/example.py
- caaba_4.5.0gmdd/skeleton/ctrl/loworg.py
- caaba_4.5.0gmdd/skeleton/messy_mecca_kpp_precision.f90
- caaba_4.5.0gmdd/skeleton/skeleton.rpl
- caaba_4.5.0gmdd/skeleton/oic.f90
- caaba_4.5.0gmdd/skeleton/skeleton.bat
- caaba_4.5.0gmdd/skeleton/m_mrgref.f90
- caaba_4.5.0gmdd/skeleton/depend.mk
- caaba_4.5.0gmdd/skeleton/targets.txt
- caaba_4.5.0gmdd/skeleton/graph_search.f90
- caaba_4.5.0gmdd/ncv
- caaba_4.5.0gmdd/manual/
- caaba_4.5.0gmdd/manual/polymecca_use_diagr.odg
- caaba_4.5.0gmdd/manual/caaba_mecca_manual.tex
- caaba_4.5.0gmdd/manual/lamago.gnu
- caaba_4.5.0gmdd/manual/caaba_sketch.pdf
- caaba_4.5.0gmdd/manual/box_model_trajec.pdf
- caaba_4.5.0gmdd/manual/caaba_flowcontrol.pdf
- caaba_4.5.0gmdd/manual/modular-mecca.pdf
- caaba_4.5.0gmdd/manual/chem.sty
- caaba_4.5.0gmdd/manual/box_model_static.odg
- caaba_4.5.0gmdd/manual/flowcontrol_xcaaba.odg
- caaba_4.5.0gmdd/manual/lamago.pdf
- caaba_4.5.0gmdd/manual/modular-mecca.odg
- caaba_4.5.0gmdd/manual/caaba_mecca_manual.ind
- caaba_4.5.0gmdd/manual/traject_model.pdf
- caaba_4.5.0gmdd/manual/caaba_sketch.odg
- caaba_4.5.0gmdd/manual/Makefile
- caaba_4.5.0gmdd/manual/steady_state_model.pdf
- caaba_4.5.0gmdd/manual/traject_model.odg
- caaba_4.5.0gmdd/manual/caaba_mecca_manual.pdf
- caaba_4.5.0gmdd/manual/caaba_mecca_logo_print.pdf
- caaba_4.5.0gmdd/manual/steady_state_model.odg
- caaba_4.5.0gmdd/manual/caaba_mecca_manual.ilg
- caaba_4.5.0gmdd/manual/caaba_use_diagr.pdf
- caaba_4.5.0gmdd/manual/kpp_use_diagr.pdf
- caaba_4.5.0gmdd/manual/flowcontrol_xjvpp.pdf
- caaba_4.5.0gmdd/manual/mecca_info.tex
- caaba_4.5.0gmdd/manual/flowcontrol_xjvpp.odg
- caaba_4.5.0gmdd/manual/presentation/
- caaba_4.5.0gmdd/manual/presentation/caaba_sketch.pdf
- caaba_4.5.0gmdd/manual/presentation/modular-mecca.pdf
- caaba_4.5.0gmdd/manual/presentation/caaba_mecca_intro.pdf
- caaba_4.5.0gmdd/manual/presentation/traject_model.pdf
- caaba_4.5.0gmdd/manual/presentation/box_model.odg
- caaba_4.5.0gmdd/manual/presentation/steady_state_model.pdf
- caaba_4.5.0gmdd/manual/presentation/caaba_mecca_intro.tex
- caaba_4.5.0gmdd/manual/presentation/box_model.pdf
- caaba_4.5.0gmdd/manual/caaba_mecca_manual.idx
- caaba_4.5.0gmdd/manual/caaba_use_diagr.odg
- caaba_4.5.0gmdd/manual/getwords
- caaba_4.5.0gmdd/manual/polymecca_use_diagr.pdf
- caaba_4.5.0gmdd/manual/kpp_use_diagr.odg
- caaba_4.5.0gmdd/manual/box_model_trajec.odg
- caaba_4.5.0gmdd/manual/doxygen/
- caaba_4.5.0gmdd/manual/doxygen/xdoxygen
- caaba_4.5.0gmdd/manual/doxygen/caaba_doxygen.cfg
- caaba_4.5.0gmdd/manual/doxygen/caaba_doxygen.pdf
- caaba_4.5.0gmdd/manual/mecca_Br.pdf
- caaba_4.5.0gmdd/manual/flowcontrol_xcaaba.pdf
- caaba_4.5.0gmdd/manual/box_model_static.pdf
- caaba_4.5.0gmdd/manual/random.pdf
- caaba_4.5.0gmdd/manual/caaba_flowcontrol.odg
- caaba_4.5.0gmdd/manual/meccanism.pdf
- caaba_4.5.0gmdd/manual/myindex.ist
- caaba_4.5.0gmdd/messy_mecca_kpp_function.f90
- caaba_4.5.0gmdd/testsuite/
- caaba_4.5.0gmdd/testsuite/radjimt-00/
- caaba_4.5.0gmdd/testsuite/radjimt-00/caaba_mecca_k_end.nc
- caaba_4.5.0gmdd/testsuite/radjimt-00/caaba_radjimt.nc
- caaba_4.5.0gmdd/testsuite/radjimt-00/caaba_mecca.nc
- caaba_4.5.0gmdd/testsuite/radjimt-00/caaba_mecca_c_end.nc
- caaba_4.5.0gmdd/testsuite/radjimt-00/caaba_ratesa.nc
- caaba_4.5.0gmdd/testsuite/radjimt-00/caaba_messy.nc
- caaba_4.5.0gmdd/testsuite/radjimt-00/caaba_mecca_a_end.dat
- caaba_4.5.0gmdd/testsuite/README
- caaba_4.5.0gmdd/testsuite/cams/
- caaba_4.5.0gmdd/testsuite/cams/cams.pdf
- caaba_4.5.0gmdd/testsuite/cams/cb05bascoe/
- caaba_4.5.0gmdd/testsuite/cams/cb05bascoe/caaba_mecca.nc
- caaba_4.5.0gmdd/testsuite/cams/mom/
- caaba_4.5.0gmdd/testsuite/cams/mom/caaba_mecca.nc
- caaba_4.5.0gmdd/testsuite/cams/README
- caaba_4.5.0gmdd/testsuite/cams/mozart/
- caaba_4.5.0gmdd/testsuite/cams/mozart/caaba_mecca.nc
- caaba_4.5.0gmdd/testsuite/cams/mim1/
- caaba_4.5.0gmdd/testsuite/cams/mim1/caaba_mecca.nc
- caaba_4.5.0gmdd/testsuite/cams/cbm05bascoe/
- caaba_4.5.0gmdd/testsuite/cams/cbm05bascoe/caaba_mecca.nc
- caaba_4.5.0gmdd/testsuite/cams/cams.py
- caaba_4.5.0gmdd/testsuite/cams/mcm/
- caaba_4.5.0gmdd/testsuite/cams/mcm/caaba_mecca.nc
- caaba_4.5.0gmdd/testsuite/cams/jam/
- caaba_4.5.0gmdd/testsuite/cams/jam/caaba_mecca.nc
- caaba_4.5.0gmdd/testsuite/radjimt_mixrat.pdf
- caaba_4.5.0gmdd/testsuite/radjimt-50/
- caaba_4.5.0gmdd/testsuite/radjimt-50/caaba_mecca_k_end.nc
- caaba_4.5.0gmdd/testsuite/radjimt-50/caaba_radjimt.nc
- caaba_4.5.0gmdd/testsuite/radjimt-50/caaba_mecca.nc
- caaba_4.5.0gmdd/testsuite/radjimt-50/caaba_mecca_c_end.nc
- caaba_4.5.0gmdd/testsuite/radjimt-50/caaba_ratesa.nc
- caaba_4.5.0gmdd/testsuite/radjimt-50/caaba_messy.nc
- caaba_4.5.0gmdd/testsuite/radjimt-50/caaba_mecca_a_end.dat
- caaba_4.5.0gmdd/testsuite/radjimt_jvalues.pdf
- caaba_4.5.0gmdd/testsuite/radjimt.pdf
- caaba_4.5.0gmdd/testsuite/traject/
- caaba_4.5.0gmdd/testsuite/traject/caaba_sappho.nc
- caaba_4.5.0gmdd/testsuite/traject/caaba_jval.nc
- caaba_4.5.0gmdd/testsuite/traject/caaba_mecca_k_end.nc
- caaba_4.5.0gmdd/testsuite/traject/caaba_mecca.nc
- caaba_4.5.0gmdd/testsuite/traject/caaba_mecca_c_end.nc
- caaba_4.5.0gmdd/testsuite/traject/caaba_ratesa.nc
- caaba_4.5.0gmdd/testsuite/traject/caaba_messy.nc
- caaba_4.5.0gmdd/testsuite/traject/caaba_traject.nml
- caaba_4.5.0gmdd/testsuite/traject/caaba_mecca_a_end.dat
- caaba_4.5.0gmdd/messy_mecca_kpp_util.f90
- caaba_4.5.0gmdd/caaba.f90
- caaba_4.5.0gmdd/messy_jval_jvpp.inc
- caaba_4.5.0gmdd/messy_radjimt.f90
- caaba_4.5.0gmdd/messy_mecca_kpp_parameters.f90
- caaba_4.5.0gmdd/messy_main_rnd_lux.f90
- caaba_4.5.0gmdd/messy_main_rnd_mtw.f90
- caaba_4.5.0gmdd/messy_mecca_kpp_jacobian.f90
- caaba_4.5.0gmdd/caaba_module.f90
- caaba_4.5.0gmdd/messy_mecca_kpp_global.f90
- caaba_4.5.0gmdd/messy_mecca_kpp_linearalgebra.f90
- caaba_4.5.0gmdd/messy_semidep_box.f90
- caaba_4.5.0gmdd/messy_mecca_kpp_rates.f90
- caaba_4.5.0gmdd/messy_main_timer.f90
- caaba_4.5.0gmdd/messy_readj_box.f90
- caaba_4.5.0gmdd/mecca/
- caaba_4.5.0gmdd/mecca/spc2mpl.awk
- caaba_4.5.0gmdd/mecca/messy_mecca_mr2c_si.inc
- caaba_4.5.0gmdd/mecca/decomp/
- caaba_4.5.0gmdd/mecca/decomp/seddecomp_ros-auto
- caaba_4.5.0gmdd/mecca/decomp/seddecomp_ros2
- caaba_4.5.0gmdd/mecca/decomp/xdecomp
- caaba_4.5.0gmdd/mecca/decomp/locate_f90.sh
- caaba_4.5.0gmdd/mecca/template_messy_mecca_poly_si.f90
- caaba_4.5.0gmdd/mecca/aqueous.spc
- caaba_4.5.0gmdd/mecca/process_aqueous.tbl
- caaba_4.5.0gmdd/mecca/del_Cindex0.tcsh
- caaba_4.5.0gmdd/mecca/substitute.awk
- caaba_4.5.0gmdd/mecca/gpl.txt
- caaba_4.5.0gmdd/mecca/process_gas.tbl
- caaba_4.5.0gmdd/mecca/spc2jnl.awk
- caaba_4.5.0gmdd/mecca/graphviz/
- caaba_4.5.0gmdd/mecca/graphviz/mecca_I.pdf
- caaba_4.5.0gmdd/mecca/graphviz/mecca_C3.pdf
- caaba_4.5.0gmdd/mecca/graphviz/mecca_C9.pdf
- caaba_4.5.0gmdd/mecca/graphviz/mecca_C1.pdf
- caaba_4.5.0gmdd/mecca/graphviz/mecca_Fe.pdf
- caaba_4.5.0gmdd/mecca/graphviz/mecca_N.pdf
- caaba_4.5.0gmdd/mecca/graphviz/mecca_S.pdf
- caaba_4.5.0gmdd/mecca/graphviz/mecca_C4.pdf
- caaba_4.5.0gmdd/mecca/graphviz/mecca_C6.pdf
- caaba_4.5.0gmdd/mecca/graphviz/mecca_C8.pdf
- caaba_4.5.0gmdd/mecca/graphviz/spc_extract.awk
- caaba_4.5.0gmdd/mecca/graphviz/mecca_C5.pdf
- caaba_4.5.0gmdd/mecca/graphviz/mecca_C10.pdf
- caaba_4.5.0gmdd/mecca/graphviz/mecca_OH_HO2.pdf
- caaba_4.5.0gmdd/mecca/graphviz/mecca_Br.pdf
- caaba_4.5.0gmdd/mecca/graphviz/eqn2dot.awk
- caaba_4.5.0gmdd/mecca/graphviz/mecca_Cl.pdf
- caaba_4.5.0gmdd/mecca/graphviz/xgraphvizall
- caaba_4.5.0gmdd/mecca/graphviz/mecca_C7.pdf
- caaba_4.5.0gmdd/mecca/graphviz/mecca_C2.pdf
- caaba_4.5.0gmdd/mecca/graphviz/xgraphviz
- caaba_4.5.0gmdd/mecca/gas.eqn
- caaba_4.5.0gmdd/mecca/nodiag.tcsh
- caaba_4.5.0gmdd/mecca/diagtrac/
- caaba_4.5.0gmdd/mecca/diagtrac/CCMI_H2O.tex
- caaba_4.5.0gmdd/mecca/diagtrac/EDITh-ua_strat_test.tex
- caaba_4.5.0gmdd/mecca/diagtrac/STRATOFLY.tex
- caaba_4.5.0gmdd/mecca/diagtrac/CCMItag.tex
- caaba_4.5.0gmdd/mecca/diagtrac/old/
- caaba_4.5.0gmdd/mecca/diagtrac/old/O3_budget.tex
- caaba_4.5.0gmdd/mecca/diagtrac/old/halogen_budget.tex
- caaba_4.5.0gmdd/mecca/diagtrac/old/o3orig.tex
- caaba_4.5.0gmdd/mecca/diagtrac/old/airtrac.tex
- caaba_4.5.0gmdd/mecca/diagtrac/old/eval2.3_budget.tex
- caaba_4.5.0gmdd/mecca/diagtrac/old/README
- caaba_4.5.0gmdd/mecca/diagtrac/old/react4c.tex
- caaba_4.5.0gmdd/mecca/diagtrac/old/CCMI-airtrac.tex
- caaba_4.5.0gmdd/mecca/diagtrac/old/CCMI-base-02-ISO_nmo.tex
- caaba_4.5.0gmdd/mecca/diagtrac/old/ESMVal-butkov.tex
- caaba_4.5.0gmdd/mecca/diagtrac/old/example.tex
- caaba_4.5.0gmdd/mecca/diagtrac/old/gas_budgets.tex
- caaba_4.5.0gmdd/mecca/diagtrac/old/gas_budgets_butkovskaya.tex
- caaba_4.5.0gmdd/mecca/diagtrac/README
- caaba_4.5.0gmdd/mecca/diagtrac/CMIP6-v01.tex
- caaba_4.5.0gmdd/mecca/diagtrac/CASiMIR.tex
- caaba_4.5.0gmdd/mecca/diagtrac/CCMItagHOx.tex
- caaba_4.5.0gmdd/mecca/diagtrac/CCMItagHOxstrato.tex
- caaba_4.5.0gmdd/mecca/diagtrac/CCMI-base-02-ISO_nmo.tex
- caaba_4.5.0gmdd/mecca/diagtrac/CMIP6-v02.tex
- caaba_4.5.0gmdd/mecca/diagtrac/EDITh-ua_strat_test_airglow.tex
- caaba_4.5.0gmdd/mecca/diagtrac/EDITh-tilo_airglow.tex
- caaba_4.5.0gmdd/mecca/diagtrac/CCMI.tex
- caaba_4.5.0gmdd/mecca/rpl/
- caaba_4.5.0gmdd/mecca/rpl/mom-COS.rpl
- caaba_4.5.0gmdd/mecca/rpl/mim1-EDITh-mesoenergy_ext.rpl
- caaba_4.5.0gmdd/mecca/rpl/mim1-CCMI-aero-01.rpl
- caaba_4.5.0gmdd/mecca/rpl/mom-DMS_COS.rpl
- caaba_4.5.0gmdd/mecca/rpl/mim1-EDITh-strat_upair_ions.rpl
[truncated: 1,214 more entries]
