# Supplementary material for: Oxidation of low-molecular weight organic compounds in clouddroplets: development of the JAMOC chemical mechanism inCAABA/MECCA (version 4.5.0gmdd)
Source: Copernicus journal article supplement (doi:10.5194/gmd-2020-337), 2020-10-29
Supplement: Supplementary file 20 [file gmd-2020-337-supplement.zip › caaba_4.5.0gmdd/ini/caaba_montecarlo.ini]

[DEFAULT]

[xcaaba]

# batchfile (*.bat) for xmecca:
batfile = mcfct.bat

# compile?
# s: Start from scratch ("gmake clean", then compile)
# c: Compile recently changed files with "gmake"
compile = c

# namelist file:
nmlfile = caaba_mcfct.nml    # Monte-Carlo factors

# start Monte-Carlo run?
l_montecarlo = True

[caabaplot]
