# Supplementary material for: Oxidation of low-molecular weight organic compounds in clouddroplets: development of the JAMOC chemical mechanism inCAABA/MECCA (version 4.5.0gmdd)
Source: Copernicus journal article supplement (doi:10.5194/gmd-2020-337), 2020-10-29
Supplement: Supplementary file 20 [file gmd-2020-337-supplement.zip › caaba_4.5.0gmdd/ini/caaba_multirun.ini]

[DEFAULT]

[xcaaba]

# batchfile (*.bat) for xmecca:
batfile =

# compile?
# s: Start from scratch ("gmake clean", then compile)
# c: Compile recently changed files with "gmake"
# r: Run existing executable
compile = r

# namelist file:
nmlfile = caaba_simple.nml    # simple model run
#nmlfile = caaba_mbl.nml      # mbl = marine boundary layer
#nmlfile = caaba_mom.nml      # MOM = Mainz organic mechanism

# start Monte-Carlo run?
l_montecarlo = False

# runcaaba?
# y: yes, run caaba.exe
# m: multirun
runcaaba = m

# netcdf file for multirun:
multirun_ncfile = example_small.nc

# output directory (default = output/%Y-%m-%d-%H:%M:%S):
outputdir =

# plot results?
l_caabaplot = False

[caabaplot]
