# Supplementary material for: Oxidation of low-molecular weight organic compounds in clouddroplets: development of the JAMOC chemical mechanism inCAABA/MECCA (version 4.5.0gmdd)
Source: Copernicus journal article supplement (doi:10.5194/gmd-2020-337), 2020-10-29
Supplement: Supplementary file 20 [file gmd-2020-337-supplement.zip › caaba_4.5.0gmdd/jnl/_acidbase_equil2_0d_a02.jnl]

LET qcs = $1[k=($plotlevel)] / ($2[k=($plotlevel)] * $3[k=($plotlevel)] *faccs)
LET kequil   = $4*EXP($5*(1/temp[d=1,k=($plotlevel)]-1/298.15))

LET quot = qcs/kequil
SET VARIABLE/TITLE="$1 / $2 * $3" quot

GO nextviewport
PLOT/SET quot[l=`starttimestep`:999999, i=($plotlon), j=($plotlat)]
GO ppl_mylayout
PPL PLOT
