# Supplementary material for: Oxidation of low-molecular weight organic compounds in clouddroplets: development of the JAMOC chemical mechanism inCAABA/MECCA (version 4.5.0gmdd)
Source: Copernicus journal article supplement (doi:10.5194/gmd-2020-337), 2020-10-29
Supplement: Supplementary file 20 [file gmd-2020-337-supplement.zip › caaba_4.5.0gmdd/jnl/_henry_equil_0d.jnl]

! test IF VARIABLE $1 exists
LET/D ($1) = 0 ! default = dummy scalar value
LET datasize = `$1,RETURN=SIZE`
IF `datasize EQ 1` THEN
  IF ($undefinedinfo) THEN SAY ($1) is undefined
  EXIT
ENDIF

! test IF VARIABLE $2 exists
LET/D ($2) = 0 ! default = dummy scalar value
LET datasize = `$2,RETURN=SIZE`
IF `datasize EQ 1` THEN
  IF ($undefinedinfo) THEN SAY ($2) is undefined
  EXIT
ENDIF

! calculate PLOT TITLE from $1
IF ($($1)%FALSE|*>TRUE%) THEN
  DEFINE SYMBOL plottitle = ($($1))
ELSE
  DEFINE SYMBOL plottitle = `$1, RETURN=TITLE`
ENDIF

LET khenry   = $3*EXP($4*(1/temp[d=1,k=($plotlevel)]-1/298.15))
LET ($1)_eq =  $2[k=($plotlevel)] / ($1[k=($plotlevel)] *  khenry) *fac
SET VARIABLE/TITLE="@sr($plottitle) equil." ($1)_eq

LET factor = 1
go _plot_0d ($1)_eq
