# Supplementary material for: Oxidation of low-molecular weight organic compounds in clouddroplets: development of the JAMOC chemical mechanism inCAABA/MECCA (version 4.5.0gmdd)
Source: Copernicus journal article supplement (doi:10.5194/gmd-2020-337), 2020-10-29
Supplement: Supplementary file 20 [file gmd-2020-337-supplement.zip › caaba_4.5.0gmdd/jnl/_plot_rxnrates.jnl]

! ------------------------------------------------------------------------------

! Before this GO script is called, the
! VARIABLE "factor" must already be defined.

! dsensi must be defined before calling this code:
IF ($dsensi%TRUE|*>FALSE%) THEN 
  SAY You must define the SYMBOL dsensi (probably in your main *.jnl file)
  EXIT/PROMPT 
ENDIF

! test IF VARIABLE exists
LET/D ($1) = 0 ! default = dummy scalar value
LET datasize = `$1,RETURN=SIZE`
IF `datasize EQ 1` THEN
  IF ($undefinedinfo) THEN SAY ($1) is undefined
  EXIT
ENDIF

! this ugly test is necessary in case the unit is empty
DEFINE SYMBOL emptytest = prefix`$1, RETURN=unit`postfix
IF ($unit%TRUE|fromdataset>TRUE|*>FALSE|%) THEN
  IF ($emptytest%|prefix postfix>TRUE|*>FALSE|%) THEN
    DEFINE SYMBOL plotunit = 1 ! 1 = dimensionless
  ELSE
    DEFINE SYMBOL plotunit = `$1, RETURN=unit`
  ENDIF
ELSE
  DEFINE SYMBOL plotunit = ($unit)
ENDIF

GO nextviewport

LET alldata  = factor*$1
IF ($diffplot) THEN
  say diffplot=TRUE: ploting differences to the base run
  LET plotdata0 = alldata[i=($plotlon),j=($plotlat),k=($plotlevel), \
    t="($startday)":"($endday)"]
  LET plotdata = plotdata0 - plotdata0[d=($dbase)]
ELSE
  LET plotdata = alldata[i=($plotlon),j=($plotlat),k=($plotlevel), \
    t="($startday)":"($endday)"]
ENDIF

! ------------------------------------------------------------------------------

! DEFINE range of PLOT DATA
IF `($nsensi) GT 0` THEN ! for PLOT/OVER
  ! the contents of _findrange cannot be placed here directly
  ! because ferret produces an error then
  GO _findrange
ELSE
  LET minval = plotdata[t=@MIN]
  LET maxval = plotdata[t=@MAX]
ENDIF

IF ($rangeinfo) THEN SAY $1 ranges from `minval` to `maxval`
! lowprecmin and lowprecmax are necessary because of ferret precision problems:
DEFINE SYMBOL lowprecmin = `minval`
DEFINE SYMBOL lowprecmax = `maxval`
IF `($lowprecmin) EQ ($lowprecmax)` THEN
  IF `(maxval EQ 0)` THEN LET maxval = 1
  IF `(maxval LT 0)` THEN LET maxval = 0
  IF `(maxval GT 0)` THEN LET minval = 0
  IF ($rangeinfo) THEN SAY plotrange adjusted: `minval` to `maxval`
ENDIF

! set minval manually?
IF ($minval%FALSE|*>TRUE%) THEN
  LET minval = ($minval)
  IF ($rangeinfo) THEN SAY minval for $1 is set manually to `minval`
  CANCEL SYMBOL minval
ENDIF
! set maxval manually?
IF ($maxval%FALSE|*>TRUE%) THEN
  LET maxval = ($maxval)
  IF ($rangeinfo) THEN SAY maxval for $1 is set manually to `maxval`
  CANCEL SYMBOL maxval
ENDIF

! calculate lg of PLOT range
IF `(maxval EQ 0) AND (minval EQ 0)` THEN
  LET lgrange = 0
ELSE
  LET lgrange = INT(LOG(maxval-minval))-1
  IF `(maxval LT 0)` THEN LET lgrange = INT(LOG((-1)*minval))-1
  IF `(minval GT 0)` THEN LET lgrange = INT(LOG(maxval))-1
ENDIF

! apply lgrange to PLOT and ytitle
IF `(lgrange GT 2) OR (lgrange LT -2)` THEN
  DEFINE SYMBOL scaledplotunit = *1E`lgrange` ($plotunit)
  LET scalefactor = 1/10^lgrange
ELSE
  DEFINE SYMBOL scaledplotunit = ($plotunit)
  LET scalefactor = 1
ENDIF

! ------------------------------------------------------------------------------

! DEFINE the PLOT TITLE
IF ($2%FALSE|*>TRUE%)  THEN
  ! USE second parameter as PLOT TITLE
  DEFINE SYMBOL plottitle = $2
ELSE
  ! calculate PLOT TITLE from $1
  IF ($($1)%FALSE|*>TRUE%) THEN
    ! use definition from _kppvar*.jnl:
    DEFINE SYMBOL plottitle = ($($1))
  ELSE
    ! use title as found in longname of netCDF variable:
    DEFINE SYMBOL plottitle = `$1, RETURN=TITLE`
  ENDIF
  ! remove aerosol number and change "-->" to real arrow:
  ! say ($plottitle)
  DEFINE SYMBOL plottitle = `{spawn:"echo '($plottitle)' | sed 's|_a[0-9][0-9]||g' | sed 's|-->|@ma60@sr|g'"}`
  ! say ($plottitle)
  IF ($plotunit%|mol/l>TRUE|*>FALSE|%) THEN
    ! add square brackets (math font 22 and 23) to denote concentrations
    DEFINE SYMBOL plottitle = @ma22@sr($plottitle)@ma23@sr
  ENDIF
ENDIF

! ------------------------------------------------------------------------------

LET/UNITS="@sr($scaledplotunit)" scaledplotdata = scalefactor * plotdata
IF `($nsensi) GT 0` THEN ! for PLOT/OVER
  !PLOT/SET/TITLE="@sr($plottitle)" \
  PLOT/SET/THICK=($thick%1%)/TITLE="@sr($plottitle)" \
    /VLIMITS=`minval*scalefactor`:`maxval*scalefactor` scaledplotdata
  GO ppl_mylayout
  PPL PLOT
  ! loop through sensitivity data sets:
  REPEAT/range=($dsensi):($dend)/name=dnum ( \
    DEFINE SYMBOL dnum = `dnum` ; \ ! convert VARIABLE to SYMBOL
    DEFINE SYMBOL dashnumber = `($dnum)-($dsensi)+1` ; \
    DEFINE SYMBOL colornumber = `($dnum)-($dsensi)+2` ; \
    PLOT/OVER/THICK=($thick%1%)/COLOR=($colornumber)/DASH=($dashtype($dashnumber))/nolabels \
      scalefactor * plotdata[d=($dnum)] )
ELSE ! plot just one data set:
  PLOT/SET/TITLE="@sr($plottitle)" scaledplotdata
  GO ppl_mylayout
  PPL PLOT
ENDIF

! ------------------------------------------------------------------------------
