# Supplementary material for: Oxidation of low-molecular weight organic compounds in clouddroplets: development of the JAMOC chemical mechanism inCAABA/MECCA (version 4.5.0gmdd)
Source: Copernicus journal article supplement (doi:10.5194/gmd-2020-337), 2020-10-29
Supplement: Supplementary file 20 [file gmd-2020-337-supplement.zip › caaba_4.5.0gmdd/jnl/_plot_rxnrates_scaled.jnl]

! ------------------------------------------------------------------------------

IF `"($3)" EQ "($species)"` THEN
  GO nextviewport
  DEFINE SYMBOL plotunit = `$1, RETURN=unit`
  PLOT/SET/TITLE="($2)" $1
  GO ppl_mylayout
  PPL PLOT

  ! write values to output file:
  LIST/QUIET/APPEND/PRECISION=10/FILE=rxnrates_scaled_($species).log $1

ENDIF

! ------------------------------------------------------------------------------
