# Supplementary material for: Oxidation of low-molecular weight organic compounds in clouddroplets: development of the JAMOC chemical mechanism inCAABA/MECCA (version 4.5.0gmdd)
Source: Copernicus journal article supplement (doi:10.5194/gmd-2020-337), 2020-10-29
Supplement: Supplementary file 20 [file gmd-2020-337-supplement.zip › caaba_4.5.0gmdd/jnl/acidbase_equil_0d.jnl]

\CANCEL MODE verify ! like "unset echo" under unix
CANCEL DATA/ALL
CANCEL VARIABLE/ALL
CANCEL SYMBOL/ALL

DEFINE SYMBOL jnlfile     = acidbase_equil_0d

! don't stop after each page:
DEFINE SYMBOL nopause = TRUE

! set makepdf to TRUE only for 1-page plots:
!DEFINE SYMBOL makepdf = TRUE

go setmodelrun
go initialize
USE "($run0)/caaba_messy.nc"     ! d=1 press,temp
USE "($run0)/caaba_mecca_aero.nc" ! d=2 lwc
! sensi first
DEFINE SYMBOL dsensi = 3 !data set number of first sensi (try `,RETURN=dsetnum`)
IF `($nsensi) GT 0` THEN ! for PLOT/OVER
  REPEAT/range=1:($nsensi)/name=dnum ( \
    DEFINE SYMBOL dnum = `dnum` ; \ ! convert VARIABLE to SYMBOL
    USE "($run($dnum))/caaba_mecca.nc" )
ENDIF
! base last because it must be the current data set
USE "($run0)/caaba_mecca.nc"

DEFINE SYMBOL pagetitle = acid/base equilibria

! SET verbosity (higher values of v produce more plots)
! v=1 equals mbl mini chemistry
LET v = 1
! iodine chemistry existent? 0 = NO, 1 = yes
LET xiod = 0
! SET modes:  xmod = 2 => both modes ;  xmod = 3 => only accum. modes
!             xmod = 1 => coarse MODE only
LET xmod = 2

LET starttimestep = 2
LET facas = 1.e-3*press[d=1,k=($plotlevel)]/(8.314409 * temp[d=1,k=($plotlevel)]*lwc_a01[d=2,k=($plotlevel)])
LET faccs = 1.e-3*press[d=1,k=($plotlevel)]/(8.314409 * temp[d=1,k=($plotlevel)]*lwc_a02[d=2,k=($plotlevel)])

GO initviewport 2 6 header

!-------------------------------------------------------------------------------
IF  `xmod GE 2` THEN

LET kequilh20   = 1e-14*EXP(-6716*(1/ temp[d=1,k=($plotlevel)]-1/298.15))
LET phasdata = facas*OHm_a01[k=($plotlevel)]*facas*Hp_a01[k=($plotlevel)]/kequilh20
GO nextviewport

PLOT/SET/TITLE="lwc (a01)" lwc_a01[d=2,k=($plotlevel),l=`starttimestep`:999999, i=($plotlon), j=($plotlat)]
GO ppl_mylayout
PPL PLOT
GO nextviewport
PLOT/SET/TITLE="H2O (a01)" phasdata[l=`starttimestep`:999999, i=($plotlon), j=($plotlat)]
GO ppl_mylayout
PPL PLOT

GO _acidbase_equil_0d_a01  Hp_a01      O2m_a01     HO2_a01   1.6e-5        0
GO _acidbase_equil_0d_a01  Hp_a01      NH3_a01     NH4p_a01  5.87647e-10  -2391
GO _acidbase_equil_0d_a01  Hp_a01      NO2m_a01    HONO_a01  5.1e-4        -1260
GO _acidbase_equil_0d_a01  Hp_a01      NO3m_a01    HNO3_a01  1.54e1        8700
GO _acidbase_equil_0d_a01  Hp_a01      NO4m_a01    HNO4_a01  1.e-5         0
GO _acidbase_equil_0d_a01  Hp_a01      HCOOm_a01   HCOOH_a01 1.8E-4        0
GO _acidbase_equil_0d_a01  Hp_a01      HCO3m_a01   CO2_a01   4.3e-7        -913
GO _acidbase_equil_0d_a01  Hp_a01      Clm_a01     HCl_a01   1.7e6         6896
GO _acidbase_equil_0d_a01  Cl_a01      Clm_a01     Cl2m_a01  7.30769e-6    0
GO _acidbase_equil_0d_a01  Hp_a01      ClOm_a01    HOCl_a01   3.2e-8       0
GO _acidbase_equil_0d_a01  Hp_a01      Brm_a01     HBr_a01   1.e9          0
GO _acidbase_equil_0d_a01  Br_a01      Brm_a01     Br2m_a01  2.54E-6       -2256
GO _acidbase_equil_0d_a01  Hp_a01      BrOm_a01    HOBr_a01  2.3e-9        -3091
GO _acidbase_equil2_0d_a01 Br2Clm_a01  Br2_a01     Clm_a01   1.3           0
GO _acidbase_equil2_0d_a01 Br2Clm_a01  BrCl_a01    Brm_a01   1.8e4         7457
GO _acidbase_equil2_0d_a01 BrCl2m_a01  BrCl_a01    Clm_a01   3.84615       1143
IF `xiod EQ 1` THEN
GO _acidbase_equil2_0d_a01 ICl2m_a01   ICl_a01     Clm_a01   76.92         0
GO _acidbase_equil2_0d_a01 IBr2m_a01   IBr_a01     Brm_a01   285.71        0
ENDIF
GO _acidbase_equil_0d_a01  Hp_a01      HSO3m_a01   SO2_a01   1.7e-2        2090
GO _acidbase_equil_0d_a01  Hp_a01      SO3mm_a01   HSO3m_a01 6.E-8         1120
GO _acidbase_equil_0d_a01  Hp_a01      HSO4m_a01   H2SO4_a01 1.e3          0
GO _acidbase_equil_0d_a01  Hp_a01      SO4mm_a01   HSO4m_a01 1.02E-2       2720

ENDIF

IF `xmod EQ 2` THEN GO newpage

!-------------------------------------------------------------------------------

IF  `xmod  le 2` THEN
LET kequilh20   = 1e-14*EXP(-6716*(1/ temp[d=1,k=($plotlevel)]-1/298.15))
LET phcsdata = faccs*OHm_a02[k=($plotlevel)]*faccs*Hp_a02[k=($plotlevel)]/kequilh20
GO nextviewport

PLOT/SET/TITLE="lwc (a02)" lwc_a02[d=2,k=($plotlevel),l=`starttimestep`:999999, i=($plotlon), j=($plotlat)]
GO ppl_mylayout
PPL PLOT
GO nextviewport
PLOT/SET/TITLE="H2O (a02)" phcsdata[l=`starttimestep`:999999, i=($plotlon), j=($plotlat)]
GO ppl_mylayout
PPL PLOT

GO _acidbase_equil_0d_a02  Hp_a02      O2m_a02     HO2_a02   1.6e-5        0
GO _acidbase_equil_0d_a02  Hp_a02      NH3_a02     NH4p_a02  5.87647e-10  -2391
GO _acidbase_equil_0d_a02  Hp_a02      NO2m_a02    HONO_a02  5.1e-4        -1260
GO _acidbase_equil_0d_a02  Hp_a02      NO3m_a02    HNO3_a02  1.54e1        8700
GO _acidbase_equil_0d_a02  Hp_a02      NO4m_a02    HNO4_a02  1.e-5         0
GO _acidbase_equil_0d_a02  Hp_a02      HCOOm_a02   HCOOH_a02 1.8E-4        0
GO _acidbase_equil_0d_a02  Hp_a02      HCO3m_a02   CO2_a02   4.3e-7        -913
GO _acidbase_equil_0d_a02  Hp_a02      Clm_a02     HCl_a02   1.7e6         6896
GO _acidbase_equil_0d_a02  Cl_a02      Clm_a02     Cl2m_a02  5.2E-6        0
GO _acidbase_equil_0d_a02  Hp_a02      ClOm_a02    HOCl_a02   3.2e-8       0
GO _acidbase_equil_0d_a02  Hp_a02      Brm_a02     HBr_a02   1.e9          0
GO _acidbase_equil_0d_a02  Br_a02      Brm_a02     Br2m_a02  2.54E-6       -2256
GO _acidbase_equil_0d_a02  Hp_a02      BrOm_a02    HOBr_a02  2.3e-9        -3091
GO _acidbase_equil2_0d_a02 Br2Clm_a02  Br2_a02     Clm_a02   1.3           0
GO _acidbase_equil2_0d_a02 Br2Clm_a02  BrCl_a02    Brm_a02   1.8e4         7457
GO _acidbase_equil2_0d_a02 BrCl2m_a02  BrCl_a02    Clm_a02   3.84615       1143
IF `xiod EQ 1` THEN
GO _acidbase_equil2_0d_a02 ICl2m_a02   ICl_a02     Clm_a02   76.92         0
GO _acidbase_equil2_0d_a02 IBr2m_a02   IBr_a02     Brm_a02   285.71        0
ENDIF
GO _acidbase_equil_0d_a02  Hp_a02      HSO3m_a02   SO2_a02   1.7e-2        2090
GO _acidbase_equil_0d_a02  Hp_a02      SO3mm_a02   HSO3m_a02 6.E-8         1120
GO _acidbase_equil_0d_a02  Hp_a02      HSO4m_a02   H2SO4_a02 1.e3          0
GO _acidbase_equil_0d_a02  Hp_a02      SO4mm_a02   HSO4m_a02 1.02E-2       2720

ENDIF

!-------------------------------------------------------------------------------

GO exitviewport

EXIT
