# Supplementary material for: Oxidation of low-molecular weight organic compounds in clouddroplets: development of the JAMOC chemical mechanism inCAABA/MECCA (version 4.5.0gmdd)
Source: Copernicus journal article supplement (doi:10.5194/gmd-2020-337), 2020-10-29
Supplement: Supplementary file 20 [file gmd-2020-337-supplement.zip › caaba_4.5.0gmdd/jnl/fe_caaba.jnl]

! ****************************************************************************

\CANCEL MODE verify ! like "unset echo" under unix
CANCEL DATA/ALL
CANCEL VARIABLE/ALL
CANCEL SYMBOL/ALL

DEFINE SYMBOL nopause = TRUE
!DEFINE SYMBOL landscape = TRUE
!DEFINE SYMBOL makepdf = TRUE
GO initviewport 2 6 noheader

! ****************************************************************************

USE FeClO3.nc         ! d=1

DEFINE SYMBOL TIMERANGE = "01-JAN-2010 00:00:00":"01-JAN-2010 05:00:00" !only aerosol injection 1

! ****************************************************************************

LET licht2 = J_O1D[d=3]/4E-5
GO _plot licht licht2

! GO _plot O3
GO nextviewport
PLOT/TITLE="log(O3)"/SET/d=1/T=($TIMERANGE) log(O3[l=@SBX:25])
GO ppl_mylayout
PPL PLOT
! show model data:
plot/T=($TIMERANGE)/THICK=3/OVER/NOLABELS log(O3)
! vertical lines:
plot/D=2/T=($TIMERANGE)/COLOR=green/OVER/NOLABELS ($yaxis_max)*licht[l=@SBX:25]
plot/D=2/T=($TIMERANGE)/COLOR=blue/OVER/NOLABELS ($yaxis_max)*dummy2[l=@SBX:25]
GO nextviewport
PLOT/TITLE="O3"/SET/d=1/VLIMITS=0:4E-7/T=($TIMERANGE) O3[l=@SBX:25]
GO ppl_mylayout
PPL PLOT
! show model data:
plot/T=($TIMERANGE)/THICK=3/OVER/NOLABELS O3
! vertical lines:
plot/D=2/T=($TIMERANGE)/COLOR=green/OVER/NOLABELS ($yaxis_max)*licht[l=@SBX:25]
plot/D=2/T=($TIMERANGE)/COLOR=blue/OVER/NOLABELS ($yaxis_max)*dummy2[l=@SBX:25]

! GO _plot NO
GO nextviewport
PLOT/TITLE="log(NO)"/SET/d=1/T=($TIMERANGE) log(NO[l=@SBX:25])
GO ppl_mylayout
PPL PLOT
! show model data:
plot/T=($TIMERANGE)/THICK=3/OVER/NOLABELS log(NO)
! vertical lines:
plot/D=2/T=($TIMERANGE)/COLOR=green/OVER/NOLABELS ($yaxis_max)*licht[l=@SBX:25]
plot/D=2/T=($TIMERANGE)/COLOR=blue/OVER/NOLABELS ($yaxis_max)*dummy2[l=@SBX:25]
GO nextviewport
PLOT/TITLE="NO"/SET/d=1/VLIMITS=0:4E-9/T=($TIMERANGE) NO[l=@SBX:25]
GO ppl_mylayout
PPL PLOT
! show model data:
plot/T=($TIMERANGE)/THICK=3/OVER/NOLABELS NO
! vertical lines:
plot/D=2/T=($TIMERANGE)/COLOR=green/OVER/NOLABELS ($yaxis_max)*licht[l=@SBX:25]
plot/D=2/T=($TIMERANGE)/COLOR=blue/OVER/NOLABELS ($yaxis_max)*dummy2[l=@SBX:25]

! GO _plot NOx
GO nextviewport
PLOT/TITLE="log(NOx)"/SET/d=1/T=($TIMERANGE) log(NOx[l=@SBX:25])
GO ppl_mylayout
PPL PLOT
! show model data:
plot/T=($TIMERANGE)/THICK=3/OVER/NOLABELS log(NO+NO2)
! vertical lines:
plot/D=2/T=($TIMERANGE)/COLOR=green/OVER/NOLABELS ($yaxis_max)*licht[l=@SBX:25]
plot/D=2/T=($TIMERANGE)/COLOR=blue/OVER/NOLABELS ($yaxis_max)*dummy2[l=@SBX:25]
GO nextviewport
PLOT/TITLE="NOx"/SET/d=1/VLIMITS=0:2.6E-8/T=($TIMERANGE) NOx[l=@SBX:25]
GO ppl_mylayout
PPL PLOT
! show model data:
plot/T=($TIMERANGE)/THICK=3/OVER/NOLABELS 0.5*HONO  + NO+NO2
! vertical lines:
plot/D=2/T=($TIMERANGE)/COLOR=green/OVER/NOLABELS ($yaxis_max)*licht[l=@SBX:25]
plot/D=2/T=($TIMERANGE)/COLOR=blue/OVER/NOLABELS ($yaxis_max)*dummy2[l=@SBX:25]

GO _plot N2O5       N2O5
GO _plot HONO       HONO
GO _plot HNO3       HNO3

!GO _plot C2H6       C2H6  !Not in sample data set

GO _plot HCla       HCl
GO _plot HClb       HCl
GO _plot HOCla      HOCl
GO _plot dummy7     HOCl
GO _plot HOClb      HOCl
GO _plot Cl2        Cl2
GO _plot Cla        Cl
GO _plot Clb        Cl
GO _plot ClOa       ClO
GO _plot ClOb       ClO

GO _plot ClNO2      ClNO2
GO _plot ClNO2b     ClNO2
GO _plot ClONO2a    ClNO3
GO _plot ClONO2b    ClNO3

GO _plot HOBra      HOBr
GO _plot dummy8     HOBr
GO _plot HOBrb      HOBr
GO _plot Br2_total  Br2
GO _plot Br2a       Br2
GO _plot Br2b       Br2
GO _plot Br2c       Br2
GO _plot dummy5     Br2
GO _plot dummy6     Br2
GO _plot Bra        Br
GO _plot Brb        Br
GO _plot BrO_a      BrO
GO _plot BrO_b      BrO
GO _plot BrOa       BrO
GO _plot BrOb       BrO

GO _plot BrNO2      BrNO2
GO _plot BrNO2a     BrNO2
GO _plot BrNO2b     BrNO2

GO _plot BrCl_total BrCl
GO _plot BrCla      BrCl
GO _plot BrClb      BrCl
GO _plot BrClc      BrCl

! GO _plot propgly   
! GO _plot dummy2    
GO _plot H2O        H2O
  
GO exitviewport

! ****************************************************************************
