# Supplementary material for: Oxidation of low-molecular weight organic compounds in clouddroplets: development of the JAMOC chemical mechanism inCAABA/MECCA (version 4.5.0gmdd)
Source: Copernicus journal article supplement (doi:10.5194/gmd-2020-337), 2020-10-29
Supplement: Supplementary file 20 [file gmd-2020-337-supplement.zip › caaba_4.5.0gmdd/jnl/jval.jnl]

\CANCEL MODE verify ! like "unset echo" under unix
CANCEL DATA/ALL
CANCEL VARIABLE/ALL
CANCEL SYMBOL/ALL

! argument checking
DEFINE SYMBOL dim         = $1"0d|0d|1d|2d"
DEFINE SYMBOL jnlfile     = jval
DEFINE SYMBOL argv        = ($dim)

! don't stop after each page:
DEFINE SYMBOL nopause = TRUE

! set makepdf to TRUE only for 1-page plots:
!DEFINE SYMBOL makepdf = TRUE

go setmodelrun
go initialize
! sensi first
DEFINE SYMBOL dsensi = 1 !data set number of first sensi (try `,RETURN=dsetnum`)
IF `($nsensi) GT 0` THEN ! for PLOT/OVER
  REPEAT/range=1:($nsensi)/name=dnum ( \
    DEFINE SYMBOL dnum = `dnum` ; \ ! convert VARIABLE to SYMBOL
    USE "($run($dnum))/caaba_jval.nc" )
ENDIF
! base last because it must be the current data set
USE "($run0)/caaba_jval.nc"
DEFINE SYMBOL dbase = `($nsensi)+1`
say base run = data set number ($dbase)

GO initviewport 3 6 header
IF ($dim%|2d>TRUE|*>FALSE|%) THEN
 GO initviewport 2 4 header
ENDIF

DEFINE SYMBOL pagetitle = J-values
LET conv = 1  ! leave DATA as it is [1/s]
DEFINE SYMBOL unit = fromdataset
SAY unit = [($unit)]
LET factor = conv

! SET verbosity (higher values of v produce more plots)
LET v = 3

!-------------------------------------------------------------------------------

IF `v GE 3` THEN GO _plot_($dim) J_O2       ! J1000
IF `v GE 1` THEN GO _plot_($dim) J_O3P      ! J1001b
IF `v GE 1` THEN GO _plot_($dim) J_O1D      ! J1001a

IF `v GE 3` THEN GO _plot_($dim) J_H2O      ! J2100
IF `v GE 1` THEN GO _plot_($dim) J_H2O2     ! J2101

IF `v GE 3` THEN GO _plot_($dim) J_N2O      ! J3100
IF `v GE 1` THEN GO _plot_($dim) J_NO2      ! J3101
IF `v GE 3` THEN GO _plot_($dim) J_NO       ! J3102
IF `v GE 1` THEN GO _plot_($dim) J_NO2O     ! J3103a
IF `v GE 1` THEN GO _plot_($dim) J_NOO2     ! J3103b
IF `v GE 1` THEN GO _plot_($dim) J_N2O5     ! J3104
IF `v GE 3` THEN GO _plot_($dim) J_NO3NOO
IF `v GE 2` THEN GO _plot_($dim) J_HONO     ! J3200
IF `v GE 1` THEN GO _plot_($dim) J_HNO3     ! J3201
IF `v GE 2` THEN GO _plot_($dim) J_HNO4     ! J3202

IF `v GE 3` THEN GO _plot_($dim) J_CH4
IF `v GE 1` THEN GO _plot_($dim) J_CH3OOH   ! J4100,J4200,J4300,J4304,J4400,J4402,J4404,J4500
IF `v GE 1` THEN GO _plot_($dim) J_COH2     ! J4101a
IF `v GE 1` THEN GO _plot_($dim) J_CHOH     ! J4101b,J4203,J4302,J4403
IF `v GE 3` THEN GO _plot_($dim) J_CO2      ! J4102
IF `v GE 2` THEN GO _plot_($dim) J_CH3CHO   ! J4201
IF `v GE 2` THEN GO _plot_($dim) J_CH3CO3H  ! J4202
IF `v GE 1` THEN GO _plot_($dim) J_PAN      ! J4204,J4305,J4306,J4406,J4501
IF `v GE 3` THEN GO _plot_($dim) J_CH3COCH3 ! J4301
IF `v GE 3` THEN GO _plot_($dim) J_MGLYOX   ! J4303,J4401,J4405
IF `v GE 3` THEN GO _plot_($dim) J_MVK
IF `v GE 3` THEN GO _plot_($dim) J_GLYOX
IF `v GE 3` THEN GO _plot_($dim) J_HOCH2CHO
IF `v GE 3` THEN GO _plot_($dim) J_MACR

IF `v GE 1` THEN GO _plot_($dim) J_Cl2      ! J6000
IF `v GE 2` THEN GO _plot_($dim) J_Cl2O2    ! J6100,J8101
IF `v GE 2` THEN GO _plot_($dim) J_OClO     ! J6101
IF `v GE 3` THEN GO _plot_($dim) J_HCl      ! J6200
IF `v GE 1` THEN GO _plot_($dim) J_HOCl     ! J6201
IF `v GE 1` THEN GO _plot_($dim) J_ClNO2    ! J6300
IF `v GE 1` THEN GO _plot_($dim) J_ClNO3    ! J6301
IF `v GE 3` THEN GO _plot_($dim) J_ClONO2
IF `v GE 2` THEN GO _plot_($dim) J_CH3Cl    ! J6400
IF `v GE 2` THEN GO _plot_($dim) J_CCl4     ! J6401
IF `v GE 2` THEN GO _plot_($dim) J_CH3CCl3  ! J6402
IF `v GE 3` THEN GO _plot_($dim) J_CFCl3    ! J6500
IF `v GE 3` THEN GO _plot_($dim) J_CF2Cl2   ! J6501

IF `v GE 1` THEN GO _plot_($dim) J_Br2      ! J7000
IF `v GE 1` THEN GO _plot_($dim) J_BrO      ! J7100
IF `v GE 1` THEN GO _plot_($dim) J_HOBr     ! J7200
IF `v GE 1` THEN GO _plot_($dim) J_BrNO2    ! J7300
IF `v GE 1` THEN GO _plot_($dim) J_BrNO3    ! J7301
IF `v GE 1` THEN GO _plot_($dim) J_BrCl     ! J7600
IF `v GE 3` THEN GO _plot_($dim) J_CH3Br    ! J7400
IF `v GE 3` THEN GO _plot_($dim) J_CH2Br2
IF `v GE 3` THEN GO _plot_($dim) J_CHBr3
IF `v GE 3` THEN GO _plot_($dim) J_CHClBr2
IF `v GE 3` THEN GO _plot_($dim) J_CH2ClBr
IF `v GE 3` THEN GO _plot_($dim) J_CHCl2Br
IF `v GE 3` THEN GO _plot_($dim) J_CF3Br    ! J7500
IF `v GE 3` THEN GO _plot_($dim) J_CF2ClBr  ! J7601

IF `v GE 1` THEN GO _plot_($dim) J_I2       ! J8000
IF `v GE 1` THEN GO _plot_($dim) J_IO       ! J8100
IF `v GE 1` THEN GO _plot_($dim) J_HOI      ! J8200
IF `v GE 1` THEN GO _plot_($dim) J_INO2     ! J8300
IF `v GE 1` THEN GO _plot_($dim) J_INO3     ! J8301
IF `v GE 1` THEN GO _plot_($dim) J_CH2I2    ! J8400
IF `v GE 1` THEN GO _plot_($dim) J_CH3I     ! J8401
IF `v GE 1` THEN GO _plot_($dim) J_C3H7I    ! J8402
IF `v GE 1` THEN GO _plot_($dim) J_CH2ClI   ! J8403
IF `v GE 1` THEN GO _plot_($dim) J_ICl      ! J8600
IF `v GE 1` THEN GO _plot_($dim) J_IBr      ! J8700

IF `v GE 3` THEN GO _plot_($dim) J_SO2
IF `v GE 3` THEN GO _plot_($dim) J_SO3
IF `v GE 3` THEN GO _plot_($dim) J_SF6
IF `v GE 3` THEN GO _plot_($dim) J_OCS
IF `v GE 3` THEN GO _plot_($dim) J_CS2

GO exitviewport

EXIT
