# Supplementary material for: Oxidation of low-molecular weight organic compounds in clouddroplets: development of the JAMOC chemical mechanism inCAABA/MECCA (version 4.5.0gmdd)
Source: Copernicus journal article supplement (doi:10.5194/gmd-2020-337), 2020-10-29
Supplement: Supplementary file 20 [file gmd-2020-337-supplement.zip › caaba_4.5.0gmdd/jnl/messy.jnl]

\CANCEL MODE verify ! like "unset echo" under unix
CANCEL DATA/ALL
CANCEL VARIABLE/ALL
CANCEL SYMBOL/ALL

! argument checking
DEFINE SYMBOL dim         = $1"0d|0d|1d|2d"
DEFINE SYMBOL jnlfile     = messy
DEFINE SYMBOL argv        = ($dim)

! set makepdf to TRUE only for 1-page plots:
!DEFINE SYMBOL makepdf = TRUE

go setmodelrun
go initialize
! sensi first
DEFINE SYMBOL dsensi = 1 !data set number of first sensi (try `,RETURN=dsetnum`)
IF `($nsensi) GT 0` THEN ! for PLOT/OVER
  REPEAT/range=1:($nsensi)/name=dnum ( \
    DEFINE SYMBOL dnum = `dnum` ; \ ! convert VARIABLE to SYMBOL
    USE "($run($dnum))/caaba_messy.nc" )
ENDIF
! base last because it must be the current data set
USE "($run0)/caaba_messy.nc"
DEFINE SYMBOL dbase = `($nsensi)+1`
say base run = data set number ($dbase)

GO initviewport 3 6 header
IF ($dim%|2d>TRUE|*>FALSE|%) THEN
 GO initviewport 2 4 header
ENDIF

DEFINE SYMBOL pagetitle = pressure, temperature, sza
LET conv = 1  ! leave DATA as it is [1/s]
DEFINE SYMBOL unit = fromdataset
SAY unit = [($unit)]
LET factor = conv

! SET verbosity (higher values of v produce more plots)
LET v = 1

!-------------------------------------------------------------------------------

IF `v GE 1` THEN GO _plot_($dim) press
IF `v GE 1` THEN GO _plot_($dim) temp
IF `v GE 1` THEN GO _plot_($dim) sza

! ! TRAJECT output:
! IF `v GE 2` THEN GO _plot_($dim) lon
! IF `v GE 2` THEN GO _plot_($dim) lat

! GO nextviewport
! LET/TITLE="LAT" lat = lat
! LET/TITLE="LON" lon = IF (lon GT 0) THEN lon-360 ELSE lon
! !plot/color=2/set/hlimits=-360:0/vlimits=30:90/vs lon, lat
! plot/color=2/set/hlimits=-200:-100/vlimits=60:80/vs lon, lat
! go ppl_mylayout
! PPL PLOT
! go land

! IF `v GE 2` THEN GO _plot_($dim) iceconc     
! IF `v GE 2` THEN GO _plot_($dim) icetype     
! IF `v GE 2` THEN GO _plot_($dim) relhum      
! IF `v GE 9` THEN GO _plot_($dim) localtime   
! IF `v GE 9` THEN GO _plot_($dim) year_loc    
! IF `v GE 9` THEN GO _plot_($dim) month_loc   
! IF `v GE 9` THEN GO _plot_($dim) day_loc     
! IF `v GE 9` THEN GO _plot_($dim) hour_loc    
! IF `v GE 9` THEN GO _plot_($dim) min_loc     
! IF `v GE 9` THEN GO _plot_($dim) sec_loc     

GO exitviewport

EXIT
