# Supplementary material for: Oxidation of low-molecular weight organic compounds in clouddroplets: development of the JAMOC chemical mechanism inCAABA/MECCA (version 4.5.0gmdd)
Source: Copernicus journal article supplement (doi:10.5194/gmd-2020-337), 2020-10-29
Supplement: Supplementary file 20 [file gmd-2020-337-supplement.zip › caaba_4.5.0gmdd/jnl/montecarlo.jnl]

\CANCEL MODE verify ! like "unset echo" under unix
CANCEL DATA/ALL
CANCEL VARIABLE/ALL
CANCEL SYMBOL/ALL

DEFINE SYMBOL jnlfile = montecarlo
DEFINE SYMBOL nopause = TRUE
!DEFINE SYMBOL landscape = TRUE
GO initviewport 2 5 noheader
!GO initviewport 4 4 noheader 0.71

USE caaba_mecca_k_end.nc
GO _histogram_k

USE caaba_mecca_c_end.nc
GO _scatterplot1

GO exitviewport

EXIT
