# Supplementary material for: Oxidation of low-molecular weight organic compounds in clouddroplets: development of the JAMOC chemical mechanism inCAABA/MECCA (version 4.5.0gmdd)
Source: Copernicus journal article supplement (doi:10.5194/gmd-2020-337), 2020-10-29
Supplement: Supplementary file 20 [file gmd-2020-337-supplement.zip › caaba_4.5.0gmdd/jnl/rxnrates_scaled.jnl]

\CANCEL MODE verify ! like "unset echo" under unix
CANCEL DATA/ALL
CANCEL VARIABLE/ALL
CANCEL SYMBOL/ALL

! argument checking
DEFINE SYMBOL species     = ($1%OH%)
DEFINE SYMBOL unitacronym = $2"mpm|mpm|mpc|pa|"
DEFINE SYMBOL jnlfile     = rxnrates_scaled_($species)
DEFINE SYMBOL argv        = ($species) ($unitacronym)
SAY calculating the budget for: ($species)

! don't stop after each page:
DEFINE SYMBOL nopause = TRUE

! set makepdf to TRUE only for 1-page plots:
!DEFINE SYMBOL makepdf = TRUE

go setmodelrun
go initialize
USE "($run0)/caaba_messy.nc"     ! d=1 press,temp
! sensi first
DEFINE SYMBOL dsensi = 2 !data set number of first sensi (try `,RETURN=dsetnum`)
IF `($nsensi) GT 0` THEN ! for PLOT/OVER
  REPEAT/range=1:($nsensi)/name=dnum ( \
    DEFINE SYMBOL dnum = `dnum` ; \ ! convert VARIABLE to SYMBOL
    USE "($run($dnum))/caaba_mecca_rr.nc" )
ENDIF
! base last because it must be the current data set
!USE "($run0)_tracer_gp.nc"
USE "($run0)/caaba_mecca_rr.nc"
DEFINE SYMBOL dbase = `($nsensi)+2`
say base run = data set number ($dbase)

!GO initviewport 3 7 smallheader
GO initviewport 3 7 header
DEFINE SYMBOL pagetitle = ($species) budget
GO _mecca_spc ! DEFINE kpp variables

! DEFINE factor for conversion to selected unit
IF ($unitacronym%|mpm>TRUE|*>FALSE|%) THEN
  ! leave DATA as it is [mol/mol]
  LET conv = 1
  DEFINE SYMBOL unit = fromdataset
ENDIF
IF ($unitacronym%|mpc>TRUE|*>FALSE|%) THEN
  ! convert DATA to [molecules/cm3]
  LET conv = 6.022e23*1.e-6*press[d=1]/(8.314409*temp[d=1])
  DEFINE SYMBOL unit = mcl/cc
ENDIF
IF ($unitacronym%|pa>TRUE|*>FALSE|%) THEN
  ! convert DATA to partial pressure [Pa]
  LET conv = press[d=1]
  DEFINE SYMBOL unit = Pa
ENDIF
SAY unit = [($unit)]
LET factor = conv
! delete old file 
LIST/CLOBBER/FILE=rxnrates_scaled_($species).log conv

!-------------------------------------------------------------------------------

go _rxnrates_scaled

!-------------------------------------------------------------------------------

GO exitviewport

EXIT
