# Supplementary material for: Oxidation of low-molecular weight organic compounds in clouddroplets: development of the JAMOC chemical mechanism inCAABA/MECCA (version 4.5.0gmdd)
Source: Copernicus journal article supplement (doi:10.5194/gmd-2020-337), 2020-10-29
Supplement: Supplementary file 20 [file gmd-2020-337-supplement.zip › caaba_4.5.0gmdd/jnl/scatterplot_mc.jnl]

let q = ($1)
let p = ($2)[d=1]
GO regresst_rs
say ($2) slope = `slope,prec=3` intercep = `intercep,prec=3` rsquare = `rsquare,prec=3`
DEFINE SYMBOL rsquare = `rsquare,prec=3`

! define the threshold above which the plot will be shown:
IF `(rsquare GT 0.1)` THEN
  LET lgrange = 1-INT(LOG(p[t=@MAX]))
  DEFINE SYMBOL lgrange = `lgrange`
  LET/TITLE="($2)*1E($lgrange) (r2=($rsquare))" p_scaled = p*10^lgrange
  GO nextviewport
  PLOT/SET/VS p_scaled, q
  GO ppl_mylayout
  PPL PLOT
  PLOT/NOLABEL/TITLE="r2=($rsquare)"/LINE/VS/OVER p_scaled, qhat
ENDIF
