# Supplementary material for: Oxidation of low-molecular weight organic compounds in clouddroplets: development of the JAMOC chemical mechanism inCAABA/MECCA (version 4.5.0gmdd)
Source: Copernicus journal article supplement (doi:10.5194/gmd-2020-337), 2020-10-29
Supplement: Supplementary file 20 [file gmd-2020-337-supplement.zip › caaba_4.5.0gmdd/jnl/setmodelrun.jnl]

!*******************************************************************************

! define ($C2) as the path to the current model output:
DEFINE SYMBOL C2 = `{spawn: "cd .. ; pwd"}`
! if the above spawn command doesn't work, define the path manually, e.g.:
! DEFINE SYMBOL C2 = /home/myuserid/caaba

GO _define_sensi ($C2) "latest run"

! show other runs as well, e.g.:
!GO _define_sensi ($C2)/output/new "new"
!GO _define_sensi ($C2)/output/simple "simple"
!GO _define_sensi ($C2)/output/before "before"
!GO _define_sensi ($C2)/output/after "after"

!GO _define_sensi ($C2)/output/ros-posdef-std "ros-posdef-std"
!GO _define_sensi ($C2)/output/rodas4         "rodas4"
!GO _define_sensi ($C2)/output/sdirk2a        "sdirk2a"

! adjust and activate these lines for Monte-Carlo simulations:
!GO _define_sensi ($C2)/output/montecarlo/test/0001 "0001"
!GO _define_sensi ($C2)/output/montecarlo/test/0002 "0002"

! adjust and activate these lines for multirun simulations:
!GO _define_sensi ($C2)/output/multirun/example_small/runs/0001 "0001"
!GO _define_sensi ($C2)/output/multirun/example_small/runs/0002 "0002"
! comparing multiruns currently doesn't work:
!**ERROR: illegal limits: One-point independent axis:
!  Requires a /HLIMIT or /VLIMIT specification
!  PLOT/SET/THICK=1/TITLE="@srO(^1D)" /VLIMITS=0:2.245598867296311 scaledplotdata

!*******************************************************************************

! plot differences to base run:
! DEFINE SYMBOL diffplot TRUE

!*******************************************************************************

! longitute
! DEFINE SYMBOL plotlon   = 35 !32
! ------------------------------------------------------------------------------
! latitude
! DEFINE SYMBOL plotlat   = 22 !22
! ------------------------------------------------------------------------------
! LEVEL
! DEFINE SYMBOL plotlevel  =  1
! DEFINE SYMBOL startlevel =  4
! DEFINE SYMBOL endlevel   = 14
! ------------------------------------------------------------------------------
! time
! DEFINE SYMBOL plotday   = 01-jan-1978 02:00
! DEFINE SYMBOL startday  = 28-mar-2000 11:00
! DEFINE SYMBOL endday    = 28-mar-2000 12:59

!*******************************************************************************
