# Supplementary material for: Oxidation of low-molecular weight organic compounds in clouddroplets: development of the JAMOC chemical mechanism inCAABA/MECCA (version 4.5.0gmdd)
Source: Copernicus journal article supplement (doi:10.5194/gmd-2020-337), 2020-10-29
Supplement: Supplementary file 20 [file gmd-2020-337-supplement.zip › caaba_4.5.0gmdd/jnl/sizebins.jnl]

\CANCEL MODE verify ! like "unset echo" under unix
CANCEL DATA/ALL
CANCEL VARIABLE/ALL
CANCEL SYMBOL/ALL

! example usage:
! go sizebins 0d mpl 1 7

! TODO:
! bugfix for ax>9 (2 digits)

! argument checking
DEFINE SYMBOL dim         = $1"0d|0d|1d|2d"
DEFINE SYMBOL unitacronym = $2"mpm|mpm|mpl|mpm3|"
DEFINE SYMBOL bin_start   = $3"1|1|2|3|4|5|6|7|8|"
DEFINE SYMBOL bin_end     = $4"7|1|2|3|4|5|6|7|8|"
DEFINE SYMBOL jnlfile     = sizebins
DEFINE SYMBOL argv        = ($dim) ($unitacronym) ($bin_start) ($bin_end)

! set makepdf to TRUE only for 1-page plots:
!DEFINE SYMBOL makepdf = TRUE

go setmodelrun
go initialize
USE "($run0)/caaba_messy.nc"      ! d=1 press,temp
USE "($run0)/caaba_mecca_aero.nc" ! d=2 lwc
USE "($run0)/caaba_mecca.nc"

DEFINE SYMBOL dsensi = 3 !data set number of first sensi (try `,RETURN=dsetnum`)
DEFINE SYMBOL run0_short = A0($bin_start) ($run0_short)
DEFINE SYMBOL nsensi = `($bin_end)-($bin_start)`
IF `($nsensi) GT 0` THEN ! for PLOT/OVER
  REPEAT/range=1:($nsensi)/name=dnum ( \
    DEFINE SYMBOL dnum = `dnum` ; \ ! convert VARIABLE to SYMBOL
    DEFINE SYMBOL run($dnum)_short = A0`($dnum)+($bin_start)` )
ENDIF

GO initviewport 2 4 header

DEFINE SYMBOL pagetitle = aqueous phase

REPEAT/range=($bin_start):($bin_end)/name=ax ( \
  DEFINE SYMBOL ax = A0`ax` ; \ ! convert VARIABLE to SYMBOL
  \ ! define name of LWC variable:
  DEFINE SYMBOL lwc_($ax) = lwc_($ax) ; \
  GO _mecca_spc ; \ ! DEFINE kpp variables
  \ ! mpm2mpl_($ax) = mol/mol to mol/L
  LET mpm2mpl_($ax) = 1.e-3*press[d=1]/(8.314409*temp[d=1]*lwc_($ax)[d=2]) ; \
  SAY ($ax): At t=t_0, 1 nmol/mol equals `1e-9 *mpm2mpl_($ax)[l=1]` mol/l    ; \
  SAY ($ax): At t=t_0, 1 pmol/mol equals `1e-12*mpm2mpl_($ax)[l=1]` mol/l    ; \
  SAY ($ax): At t=t_0, 1 mol/l    equals `1e12 /mpm2mpl_($ax)[l=1]` pmol/mol )

! mpm2mpm3 = mol/mol to mol/m3
LET mpm2mpm3 = press[d=1]/(8.314409*temp[d=1])
SAY At t=t_0, 1 nmol/mol equals `mpm2mpm3[l=1]` nmol/m3(air)
SAY At t=t_0, 1 pmol/mol equals `mpm2mpm3[l=1]` pmol/m3(air)

! DEFINE factor for conversion to selected unit
IF ($unitacronym%|mpm>TRUE|*>FALSE|%) THEN
  ! leave DATA as it is [mol/mol]
  REPEAT/range=($bin_start):($bin_end)/name=ax ( \
    DEFINE SYMBOL ax = A0`ax` ; \ ! convert VARIABLE to SYMBOL
    LET conv_($ax) = 1 ; \
    LET factor_($ax) = conv_($ax) )
  DEFINE SYMBOL unit = fromdataset
ENDIF
IF ($unitacronym%|mpl>TRUE|*>FALSE|%) THEN
  ! convert DATA to [mol/l]
  REPEAT/range=($bin_start):($bin_end)/name=ax ( \
    DEFINE SYMBOL ax = A0`ax` ; \ ! convert VARIABLE to SYMBOL
    LET conv_($ax) = mpm2mpl_($ax) ; \
    LET factor_($ax) = conv_($ax) )
  DEFINE SYMBOL unit = mol/l
ENDIF
IF ($unitacronym%|mpm3>TRUE|*>FALSE|%) THEN
  ! convert DATA to [mol/m3]
  REPEAT/range=($bin_start):($bin_end)/name=ax ( \
    DEFINE SYMBOL ax = A0`ax` ; \ ! convert VARIABLE to SYMBOL
    LET conv_($ax) = mpm2mpm3 ; \
    LET factor_($ax) = conv_($ax) )
  DEFINE SYMBOL unit = mol/m^3
ENDIF
SAY unit = [($unit)]

! SET verbosity (higher values of v produce more plots)
LET v = 1

!-------------------------------------------------------------------------------

! DEFINE some families

REPEAT/range=($bin_start):($bin_end)/name=ax ( \
  DEFINE SYMBOL ax = A0`ax` ; \ ! convert VARIABLE to SYMBOL
  go _families_a ($ax) )

!-------------------------------------------------------------------------------

DEFINE SYMBOL saveunit = ($unit)
DEFINE SYMBOL unit = fromdataset
REPEAT/range=($bin_start):($bin_end)/name=ax ( \
  DEFINE SYMBOL ax = A0`ax` ; \ ! convert VARIABLE to SYMBOL
  LET factor_($ax) = 1 )

IF `v GE 1` THEN GO _plot_sizebins pH
IF `v GE 1` THEN GO _plot_sizebins XpdXm
IF `v GE 1` THEN GO _plot_sizebins xlwc
IF `v GE 1` THEN GO _plot_sizebins Kw

!enrichment factors (doesn't work if Na=0)
! IF `v GE 1` THEN GO _plot_sizebins EF_Clm
! IF `v GE 1` THEN GO _plot_sizebins EF_Brm

DEFINE SYMBOL unit = ($saveunit)
REPEAT/range=($bin_start):($bin_end)/name=ax ( \
  DEFINE SYMBOL ax = A0`ax` ; \ ! convert VARIABLE to SYMBOL
  LET factor_($ax) = conv_($ax) )

!-------------------------------------------------------------------------------

IF `v GE 1` THEN GO _plot_sizebins cations
IF `v GE 1` THEN GO _plot_sizebins anions

!Na+
IF `v GE 1` THEN GO _plot_sizebins Nap

! O, H
IF `v GE 1` THEN GO _plot_sizebins Hp
IF `v GE 1` THEN GO _plot_sizebins OHm
IF `v GE 3` THEN GO _plot_sizebins O2
IF `v GE 2` THEN GO _plot_sizebins O3
IF `v GE 2` THEN GO _plot_sizebins OH
IF `v GE 2` THEN GO _plot_sizebins HO2tot
IF `v GE 3` THEN GO _plot_sizebins HO2
IF `v GE 3` THEN GO _plot_sizebins O2m
IF `v GE 2` THEN GO _plot_sizebins H2O
IF `v GE 1` THEN GO _plot_sizebins H2O2
! N
IF `v GE 1` THEN GO _plot_sizebins NH3tot
IF `v GE 3` THEN GO _plot_sizebins NH3
IF `v GE 3` THEN GO _plot_sizebins NH4p
IF `v GE 2` THEN GO _plot_sizebins NO2
IF `v GE 2` THEN GO _plot_sizebins NO3
IF `v GE 2` THEN GO _plot_sizebins HONOtot
IF `v GE 3` THEN GO _plot_sizebins HONO
IF `v GE 3` THEN GO _plot_sizebins NO2m
IF `v GE 1` THEN GO _plot_sizebins HNO3tot
IF `v GE 3` THEN GO _plot_sizebins HNO3
IF `v GE 3` THEN GO _plot_sizebins NO3m
IF `v GE 2` THEN GO _plot_sizebins HNO4tot
IF `v GE 3` THEN GO _plot_sizebins HNO4
IF `v GE 3` THEN GO _plot_sizebins NO4m
! C
IF `v GE 2` THEN GO _plot_sizebins CH3OH
IF `v GE 2` THEN GO _plot_sizebins CH3OO
IF `v GE 2` THEN GO _plot_sizebins CH3OOH
IF `v GE 2` THEN GO _plot_sizebins HCHO
IF `v GE 2` THEN GO _plot_sizebins HCOOHtot
IF `v GE 3` THEN GO _plot_sizebins HCOOH
IF `v GE 3` THEN GO _plot_sizebins HCOOm
IF `v GE 2` THEN GO _plot_sizebins CO3m
IF `v GE 1` THEN GO _plot_sizebins CO2tot
IF `v GE 3` THEN GO _plot_sizebins CO2
IF `v GE 3` THEN GO _plot_sizebins HCO3m
! Cl
IF `v GE 2` THEN GO _plot_sizebins Cltot
IF `v GE 1` THEN GO _plot_sizebins HCltot
IF `v GE 3` THEN GO _plot_sizebins HCl
IF `v GE 3` THEN GO _plot_sizebins Clm
IF `v GE 2` THEN GO _plot_sizebins Clrad
IF `v GE 3` THEN GO _plot_sizebins Cl
IF `v GE 3` THEN GO _plot_sizebins Cl2m
IF `v GE 2` THEN GO _plot_sizebins HOCltot
IF `v GE 3` THEN GO _plot_sizebins HOCl
IF `v GE 3` THEN GO _plot_sizebins ClOm
IF `v GE 2` THEN GO _plot_sizebins ClOHm
IF `v GE 2` THEN GO _plot_sizebins Cl2
! Br
IF `v GE 1` THEN GO _plot_sizebins Brtot
IF `v GE 1` THEN GO _plot_sizebins HBrtot
IF `v GE 3` THEN GO _plot_sizebins HBr
IF `v GE 3` THEN GO _plot_sizebins Brm
IF `v GE 2` THEN GO _plot_sizebins Brrad
IF `v GE 3` THEN GO _plot_sizebins Br
IF `v GE 3` THEN GO _plot_sizebins Br2m
IF `v GE 2` THEN GO _plot_sizebins HOBrtot
IF `v GE 3` THEN GO _plot_sizebins HOBr
IF `v GE 3` THEN GO _plot_sizebins BrOm
IF `v GE 2` THEN GO _plot_sizebins BrOHm
IF `v GE 2` THEN GO _plot_sizebins Br2
IF `v GE 2` THEN GO _plot_sizebins BrCl
IF `v GE 2` THEN GO _plot_sizebins BrCl2m
IF `v GE 2` THEN GO _plot_sizebins Br2Clm
! I
IF `v GE 1` THEN GO _plot_sizebins Itot
IF `v GE 2` THEN GO _plot_sizebins Im
IF `v GE 2` THEN GO _plot_sizebins HOI
IF `v GE 2` THEN GO _plot_sizebins I2
IF `v GE 2` THEN GO _plot_sizebins IO
IF `v GE 2` THEN GO _plot_sizebins IO2m
IF `v GE 2` THEN GO _plot_sizebins IO3m
IF `v GE 2` THEN GO _plot_sizebins ICl
IF `v GE 2` THEN GO _plot_sizebins IBr
IF `v GE 2` THEN GO _plot_sizebins ICl2m
IF `v GE 2` THEN GO _plot_sizebins IBr2m
! S
IF `v GE 2` THEN GO _plot_sizebins CH3SO3m
IF `v GE 2` THEN GO _plot_sizebins DMSO
IF `v GE 1` THEN GO _plot_sizebins SO2tot
IF `v GE 3` THEN GO _plot_sizebins SO2
IF `v GE 3` THEN GO _plot_sizebins HSO3m
IF `v GE 3` THEN GO _plot_sizebins SO3mm
IF `v GE 1` THEN GO _plot_sizebins H2SO4tot
IF `v GE 3` THEN GO _plot_sizebins H2SO4
IF `v GE 3` THEN GO _plot_sizebins HSO4m
IF `v GE 3` THEN GO _plot_sizebins SO4mm
IF `v GE 2` THEN GO _plot_sizebins HSO5m
IF `v GE 2` THEN GO _plot_sizebins SO3m
IF `v GE 2` THEN GO _plot_sizebins SO4m
IF `v GE 2` THEN GO _plot_sizebins SO5m
IF `v GE 2` THEN GO _plot_sizebins CH2OHSO3m

GO exitviewport

EXIT
