# Supplementary material for: Oxidation of low-molecular weight organic compounds in clouddroplets: development of the JAMOC chemical mechanism inCAABA/MECCA (version 4.5.0gmdd)
Source: Copernicus journal article supplement (doi:10.5194/gmd-2020-337), 2020-10-29
Supplement: Supplementary file 20 [file gmd-2020-337-supplement.zip › caaba_4.5.0gmdd/jnl/tools/_define_sensi.jnl]

! if nsensi is undefined, set it to zero:
IF ($nsensi%TRUE|*>FALSE%) THEN DEFINE SYMBOL nsensi = 0
! define name for this sensitivity run:
DEFINE SYMBOL run($nsensi) = $1
! define short name for this sensitivity run:
DEFINE SYMBOL run($nsensi)_short = $2
! increment nsensi:
DEFINE SYMBOL nsensi = `($nsensi)+1`
