# Supplementary material for: Oxidation of low-molecular weight organic compounds in clouddroplets: development of the JAMOC chemical mechanism inCAABA/MECCA (version 4.5.0gmdd)
Source: Copernicus journal article supplement (doi:10.5194/gmd-2020-337), 2020-10-29
Supplement: Supplementary file 20 [file gmd-2020-337-supplement.zip › caaba_4.5.0gmdd/jnl/tools/_findrange.jnl]

! the contents of _findrange cannot be placed into _plot_0d.jnl directly
! because ferret produces an error then

! dsensi must be defined before calling this code:
IF ($dsensi%TRUE|*>FALSE%) THEN 
  SAY You must define the SYMBOL dsensi (probably in your main *.jnl file)
  EXIT/PROMPT 
ENDIF

DEFINE SYMBOL dend   = `($dsensi)+($nsensi)-1`
! start with minval and maxval from base data set:
LET minval = plotdata[t=@MIN]
LET maxval = plotdata[t=@MAX]
! loop through other data sets to see if there are extremes:
REPEAT/range=($dsensi):($dend)/name=dnum ( \
  DEFINE SYMBOL dnum = `dnum` ; \ ! convert VARIABLE to SYMBOL
  IF `plotdata[t=@MIN,d=($dnum)] LT minval` THEN ; \
    LET minval = plotdata[t=@MIN,d=($dnum)] ; \
  ENDIF ; \
  IF `plotdata[t=@MAX,d=($dnum)] GT maxval` THEN ; \
    LET maxval = plotdata[t=@MAX,d=($dnum)] ; \
  ENDIF )
