# Supplementary material for: Oxidation of low-molecular weight organic compounds in clouddroplets: development of the JAMOC chemical mechanism inCAABA/MECCA (version 4.5.0gmdd)
Source: Copernicus journal article supplement (doi:10.5194/gmd-2020-337), 2020-10-29
Supplement: Supplementary file 20 [file gmd-2020-337-supplement.zip › caaba_4.5.0gmdd/jnl/tools/_findrange_sizebins.jnl]

! the contents of _findrange cannot be placed into _plot_0d.jnl directly
! because ferret produces an error then

! start with minval and maxval from base data set:
LET minval = factor_A0($bin_start) * \
  ($1)_A0($bin_start)[i=($plotlon),j=($plotlat),k=($plotlevel), \
  t="($startday)":"($endday)"@MIN]
LET maxval = factor_A0($bin_start) * \
  ($1)_A0($bin_start)[i=($plotlon),j=($plotlat),k=($plotlevel), \
  t="($startday)":"($endday)"@MAX]
! loop through all data sets to see if there are extremes:
REPEAT/range=($bin_start):($bin_end)/name=ax ( \
  DEFINE SYMBOL ax = A0`ax` ; \ ! convert VARIABLE to SYMBOL
  LET plotdata = factor_($ax) * \
    ($1)_($ax)[i=($plotlon),j=($plotlat),k=($plotlevel), \
    t="($startday)":"($endday)"] ; \
  say ($1)_($ax) ranges from `plotdata[t=@MIN]` to `plotdata[t=@MAX]` ; \
  IF `plotdata[t=@MIN] LT minval` THEN ; \
    LET minval = factor_($ax) * \
      ($1)_($ax)[i=($plotlon),j=($plotlat),k=($plotlevel), \
      t="($startday)":"($endday)"@MIN] ; \
  ENDIF ; \
  IF `plotdata[t=@MAX] GT maxval` THEN ; \
    LET maxval = factor_($ax) * \
      ($1)_($ax)[i=($plotlon),j=($plotlat),k=($plotlevel), \
      t="($startday)":"($endday)"@MAX] ; \
  ENDIF )
