# Supplementary material for: Oxidation of low-molecular weight organic compounds in clouddroplets: development of the JAMOC chemical mechanism inCAABA/MECCA (version 4.5.0gmdd)
Source: Copernicus journal article supplement (doi:10.5194/gmd-2020-337), 2020-10-29
Supplement: Supplementary file 20 [file gmd-2020-337-supplement.zip › caaba_4.5.0gmdd/jnl/tools/_plot_sizebins.jnl]

! ------------------------------------------------------------------------------

! Before this GO script is called, the
! VARIABLES "factor_($ax)" must already be defined.

DEFINE SYMBOL data1 = ($1)_A0($bin_start)

! test IF VARIABLE exists
LET/D ($data1) = 0 ! default = dummy scalar value
LET datasize = `($data1),RETURN=SIZE`
IF `datasize EQ 1` THEN
  IF ($undefinedinfo) THEN SAY ($data1) is undefined
  EXIT
ENDIF

! this ugly test is necessary in case the unit is empty
DEFINE SYMBOL emptytest = prefix`($data1), RETURN=unit`postfix
IF ($unit%TRUE|fromdataset>TRUE|*>FALSE|%) THEN
  IF ($emptytest%|prefix postfix>TRUE|*>FALSE|%) THEN
    DEFINE SYMBOL plotunit = 1 ! 1 = dimensionless
  ELSE
    DEFINE SYMBOL plotunit = `($data1), RETURN=unit`
  ENDIF
ELSE
  DEFINE SYMBOL plotunit = ($unit)
ENDIF

GO nextviewport

! ------------------------------------------------------------------------------

! DEFINE range of PLOT DATA
! the contents of _findrange_sizebins cannot be placed here directly
! because ferret produces an error then
GO _findrange_sizebins $1

IF ($rangeinfo) THEN SAY ($1)_A## ranges from `minval` to `maxval`
! lowprecmin and lowprecmax are necessary because of ferret precision problems:
DEFINE SYMBOL lowprecmin = `minval`
DEFINE SYMBOL lowprecmax = `maxval`
IF `($lowprecmin) EQ ($lowprecmax)` THEN
  IF `(maxval EQ 0)` THEN LET maxval = 1
  IF `(maxval LT 0)` THEN LET maxval = 0
  IF `(maxval GT 0)` THEN LET minval = 0
  IF ($rangeinfo) THEN SAY plotrange adjusted: `minval` to `maxval`
ENDIF

! calculate lg of PLOT range
IF `(maxval EQ 0) AND (minval EQ 0)` THEN
  LET lgrange = 0
ELSE
  LET lgrange = INT(LOG(maxval-minval))-1
  IF `(maxval LT 0)` THEN LET lgrange = INT(LOG((-1)*minval))-1
  IF `(minval GT 0)` THEN LET lgrange = INT(LOG(maxval))-1
ENDIF

! apply lgrange to PLOT and ytitle
IF `(lgrange GT 2) OR (lgrange LT -2)` THEN
  DEFINE SYMBOL scaledplotunit = *1E`lgrange` ($plotunit)
  LET scalefactor = 1/10^lgrange
ELSE
  DEFINE SYMBOL scaledplotunit = ($plotunit)
  LET scalefactor = 1
ENDIF

IF ($plotunit%|mol/mol>TRUE|mol/mol/day>TRUE|mol/m^3>TRUE|mol/m^3/day>TRUE|*>FALSE|%) THEN
  ! scale to pmol/mol OR nmol/mol OR micromol/mol
  ! or       pmol/m3  OR nmol/m3  OR micromol/m3
  IF `(lgrange GE -12) AND (lgrange LT -9)` THEN
    DEFINE SYMBOL scaledplotunit = p($plotunit)
    LET scalefactor = 1e12
  ENDIF
  IF `(lgrange GE -9) AND (lgrange LT -6)` THEN
    DEFINE SYMBOL scaledplotunit = n($plotunit)
    LET scalefactor = 1e9
  ENDIF
  IF `(lgrange GE -6) AND (lgrange LT -3)` THEN
    DEFINE SYMBOL scaledplotunit = @sgm@as($plotunit)
    LET scalefactor = 1e6
  ENDIF
ENDIF

! ------------------------------------------------------------------------------

! DEFINE the PLOT TITLE
IF ($2%FALSE|*>TRUE%)  THEN
  ! USE second parameter as PLOT TITLE
  DEFINE SYMBOL plottitle = $2
ELSE
  ! calculate PLOT TITLE from ($data1)
  IF ($($data1)%FALSE|*>TRUE%) THEN
    ! use definition from _mecca_spc.jnl:
    DEFINE SYMBOL plottitle = ($($data1))
  ELSE
    ! use title as found in longname of netCDF variable:
    DEFINE SYMBOL plottitle = `($data1), RETURN=TITLE`
  ENDIF
  ! remove aerosol number and change "-->" to real arrow:
  ! say ($plottitle)
  DEFINE SYMBOL plottitle = `{spawn:"echo '($plottitle)' | sed 's| (A[0-9][0-9])||g' | sed 's|-->|@ma60@sr|g'"}`
  ! say ($plottitle)
  IF ($plotunit%|mol/l>TRUE|*>FALSE|%) THEN
    ! add square brackets (math font 22 and 23) to denote concentrations
    DEFINE SYMBOL plottitle = @ma22@sr($plottitle)@ma23@sr
  ENDIF
ENDIF

! ------------------------------------------------------------------------------

! loop through aerosol size bins:
REPEAT/range=($bin_start):($bin_end)/name=ax ( \
  DEFINE SYMBOL ax = A0`ax` ; \ ! convert VARIABLE to SYMBOL
  LET alldata  = factor_($ax)*($1)_($ax) ; \
  LET plotdata = alldata[i=($plotlon),j=($plotlat),k=($plotlevel), \
  t="($startday)":"($endday)"] ; \
  IF `($bin_start) EQ ax` THEN ; \
    LET/UNITS="@as($scaledplotunit)" scaledplotdata = scalefactor*plotdata ; \
    PLOT/SET/THICK=($thick%1%)/TITLE="@sr($plottitle)" \
      /VLIMITS=`minval*scalefactor`:`maxval*scalefactor` scaledplotdata ; \
    GO ppl_mylayout ; \
    PPL PLOT ; \
  ELSE ; \
    DEFINE SYMBOL dashnumber = `ax-($bin_start)` ; \
    DEFINE SYMBOL colornumber = `ax-($bin_start)+1` ; \
    PLOT/OVER/THICK=($thick%1%)/COLOR=($colornumber) \
      /DASH=($dashtype($dashnumber))/nolabels scalefactor*plotdata ; \
  ENDIF )

! ------------------------------------------------------------------------------
