# Supplementary material for: Oxidation of low-molecular weight organic compounds in clouddroplets: development of the JAMOC chemical mechanism inCAABA/MECCA (version 4.5.0gmdd)
Source: Copernicus journal article supplement (doi:10.5194/gmd-2020-337), 2020-10-29
Supplement: Supplementary file 20 [file gmd-2020-337-supplement.zip › caaba_4.5.0gmdd/jnl/tools/bar_chart3_rs.jnl]

\cancel mode verify

! based on $FER_DIR/go/bar_chart3.jnl, changed by Rolf Sander

! bar_chart3.jnl
! 6/99 *sh*
! 7/01 *acm* update /xlimits to /hlimits

! Description: Produce a color-filled bar chart

! Usage:              $1    $2              $3       $4           $5
! yes?	GO bar_chart3 title polygon_command bar_data [color_data] [base]
! $1 - title
! $2 - the polygon command with qualifiers (eg POLYGON/OVER/NOLABEL)
! $3 - a variable -- as if it were being plotted
!       region for variable should be self-contained (not depend on SET REG
!	or on command qualifiers)
! $4 - color data
! $5 - base or offset value (this value will have a zero-sized bar)

! example  (see also bar_chart_demo)
! yes? go bar_chart3 poly/line/nolabel/fill RANDN(I[i=1:10]) RANDN(I[i=1:10]+1)

! example 2 - two variables overlaid
!let a = 1+RANDU(I[i=1:10])
! plot/hlimits=0.5:10.5/sym/ylim=0:2/title="My Bars" 0*a+0.5  ! axes + title
!go bar_chart3 poly/line/palette=red/overlay/title="My reds" a
! let b = RANDU(I[i=1:10]+1)
!go bar_chart3 poly/line/palette=blue/overlayy/title="My blues" b

! example 3
!let a = RANDN(T[T=2-jan-1990:1-jun-1990:24])
!plot/ylim=-3:3/title="hist-style plot" 0*a
!go bar_chart3 poly/over/palette=no_green_centered/levels=(-3,3,.5)/nolab a a

! argument check
QUERY/IGNORE $2"<usage: yes? GO bar_chart3 polygon_command bar_data [color_data] [base]"
QUERY/IGNORE $3"<usage: yes? GO bar_chart3 polygon_command bar_data [color_data] [base]"

! save the input expressions into simple variable definitions
LET/QUIET BCHy = $3
IF $4"0|*>1" THEN
  DEFINE SYMBOL BCHcolor  ",$4"
ELSE
  DEFINE SYMBOL BCHcolor  " "
ENDIF

LET/QUIET BCHbase = $5"0"

! determine the orientation of the data (and check that it is 1D)
DEFINE SYMBOL BCHax `BCHy,return=shape`
DEFINE SYMBOL BCHiax ($BCHax"|X>i|Y>j|Z>k|T>l|<error: data is not a line")
DEFINE SYMBOL BCHbar_ax ($BCHax"|X>Z|Y>Z|Z>Y|T>Z)   ! pick a different axis")

! get the independent axis out as a separate variable
! typically, "0*BCHy + X[i=lo:hi]", so X is inherited from BCHy
DEFINE SYMBOL BCHilo `BCHy,return=($BCHiax)start`
DEFINE SYMBOL BCHihi `BCHy,return=($BCHiax)end`
LET/QUIET BCHx = 0*BCHy + ($BCHax)[($BCHiax)=($BCHilo):($BCHihi)]

! compute midpoints along the independent axis so the "bars" are centered
! (use MISSING to extrapolate down to the bottom end of the first bar)
LET/QUIET BCHxmid = MISSING((BCHx + BCHx[($BCHiax)=@shf:-1])/2, 1.5*BCHx[($BCHiax)=($BCHilo)]-0.5*BCHx[($BCHiax)=`($BCHilo)+1`])

! create rectangles (polygons) on the BCHbar_ax axis
LET/QUIET BCHpindex = ($BCHbar_ax)[($BCHbar_ax)=1:4]
LET/QUIET BCHy4 = IF BCHpindex EQ 1 OR BCHpindex EQ 4 then 0*BCHy+BCHbase ELSE BCHy
LET/QUIET BCHx4 = MISSING(IF BCHpindex LE 2 then BCHxmid ELSE BCHxmid[($BCHiax)=@shf:1], 1.5*BCHx[($BCHiax)=($BCHihi)]-0.5*BCHx[($BCHiax)=`($BCHihi)-1`])

SET VARIABLE/TITLE="($1)" BCHx4
SET VARIABLE/TITLE="Magnitude" BCHy4

! execute the polygon command
$2/set/coord_ax=($BCHbar_ax)/TITLE="" BCHx4,BCHy4 ($BCHcolor)
GO unlabel 1 ! FERRET Ver. 5.40                   
GO unlabel 2 ! NOAA/PMEL TMAP                     
GO unlabel 3 ! Jun 10 2002 18:41:19               
GO unlabel 4 ! LONGITUDE : 165.9W(194.1) or Z(level)         
GO unlabel 5 ! LATITUDE : 12.6S     or TIME              
GO unlabel 6 ! YEAR : 1978                        
GO unlabel 7 ! DATA SET: mecca_____197801.01.nc   
GO unlabel 8 ! mecca                              
GO unlabel 9 !
PPL POLYGON

cancel symbol BCH*
cancel variable BCH*
set mode/last verify
