# Supplementary material for: Oxidation of low-molecular weight organic compounds in clouddroplets: development of the JAMOC chemical mechanism inCAABA/MECCA (version 4.5.0gmdd)
Source: Copernicus journal article supplement (doi:10.5194/gmd-2020-337), 2020-10-29
Supplement: Supplementary file 20 [file gmd-2020-337-supplement.zip › caaba_4.5.0gmdd/jnl/tools/exitviewport.jnl]

CANCEL MODE metafile
CANCEL SYMBOL pagetitle

IF ($ax%FALSE|*>TRUE|%) THEN
  ! add aerosol type to file name
  DEFINE SYMBOL outfile = ($jnlfile%ferret%)_($ax)
ELSE
  ! ax is undefined
  DEFINE SYMBOL outfile = ($jnlfile%ferret%)
ENDIF

SAY "creating ps file ($outfile).ps"
sp "($tooldir)/double_line_widths ($tmp)/page*.plt"

IF ($landscape%FALSE|*>TRUE|%) THEN
  ! landscape has been defined
  sp "cd ($tmp) ; ($tooldir)/plt_mergeto_pdf ($outfile) landscape"
ELSE
  ! landscape is undefined
  sp "cd ($tmp) ; ($tooldir)/plt_mergeto_pdf ($outfile) portrait"
ENDIF
SAY "to view ps file, type: sp acro ($tmp)/($outfile).pdf &"

!DEFINE SYMBOL makepdf = TRUE
IF ($makepdf%FALSE|TRUE|*>FALSE|%) THEN ! only if makepdf is defined and TRUE
  ! the following conversions to eps and pdf are only useful for 1-page plots:
  SAY "converting ps file to eps"
  ! portrait:
  sp "gunzip ($tmp)/($outfile).ps.gz"
  sp "ps2eps -f ($tmp)/($outfile).ps"
  ! landscape:
  ! sp "ps2eps -f --rotate=- ($outfile).ps"
  ! rename the preliminary eps file:
  sp "\mv -f ($tmp)/($outfile).eps ($tmp)/($outfile)-raw.eps"
  ! create eps file with correct bounding box:
  sp "eps2eps ($tmp)/($outfile)-raw.eps ($tmp)/($outfile).eps"
  SAY "converting eps file to pdf"
  sp "epstopdf ($tmp)/($outfile).eps"
  sp "mv ($tmp)/($outfile).pdf ."
  SAY "to view pdf file, type: sp acro ($outfile).pdf &"
ENDIF

EXIT
