# Supplementary material for: Oxidation of low-molecular weight organic compounds in clouddroplets: development of the JAMOC chemical mechanism inCAABA/MECCA (version 4.5.0gmdd)
Source: Copernicus journal article supplement (doi:10.5194/gmd-2020-337), 2020-10-29
Supplement: Supplementary file 20 [file gmd-2020-337-supplement.zip › caaba_4.5.0gmdd/jnl/tools/frequency_histogram_rs.jnl]

\cancel mode verify

! based on $FER_DIR/go/frequency_histogram.jnl, changed by Rolf Sander

!SET VARIABLE/TITLE="($1)" ($1)
let vmin = `($1)[l=@min]`
let vmax = `($1)[l=@max]`
let vdelta = (vmax-vmin)/100
! say average   = `($1)[i=@ave]`
! say sqrt(var) = `($1)[i=@var]^0.5`
IF `vdelta LE 0` THEN
  EXIT
ENDIF

say ($1): min = `vmin`, max = `vmax`
go nextviewport

!!
! frequency_histogram.jnl - *sh* 8/94
! *acm* Add argument to choose hollow or filled bars. Also fix
!       the call to bar_chart2.jnl which should use plot/line
!
! Description: produce a 1D frequency histogram

! Usage:  
!    yes? GO frequency_histogram expression [weight] [axis]  [style]

! Note: this procedure (actually the bar_chart2 routine) uses the Y axis
!	internally so it may not work properly if the Y axis has a region
! 	set (it may even crash).  In this case either include the Y limits
!	in the expression (i.e. "temp[y=0]" instead of "temp" with Y=0 in the
!       region) or specify a free axis in the optional [AXIS] parameter

! Note: If this script fails due to a large amount of input data, use 
!       frequency_histogram2.jnl which does not call Unix sort and awk
!       tools, but instead uses Ferret functions to compile the bins.

! arguments:
!    expression  - expression (values) from which histogram is to be computed
!    lo, hi, del - the range of values for which a histogram is desired
!    [weight]    - optional expression with weight for each value
!    [axis]      - a free axis that the procedure can use (if Y isn't free)
!    [style]     - 0 for hollow bars, 1 for filled.

! Defaults:  weight - "1" ("weight" can be a variable name)
!            axis - "Y"
!            style - "0" hollow

! Sample usage:
!	yes? SET DATA levitus_climatology
!	yes? GO  frequency_histogram temp[X=0:360,Y=0:45N,Z=0]
!
!	yes? GO  frequency_histogram temp[X=0:360,Y=0:45N,Z=0] " " y 1


! The optional "weight" parameter multiplies each grid cell by the variable
! supplied.  In the surface temperature example above this might be the
! area of each grid cell as follows:
!let r=6370		! radius of earth
!let pi=atan(1.)*4.
!let deg2rad=pi/180.
!let deg2km=2*pi*r/360.
!let area=xbox[g=TEMP]*ybox[g=TEMP]*cos(y[g=TEMP]*deg2rad)*deg2km*deg2km*1e-6
!SET VARIABLE/TITLE="Area of grid cells"/Unit="km^22 x 10^-6" area
!GO frequency_histogram TEMP 0 32 .5 area

query/ignore $1"<Usage: GO frequency_histogram expression lo hi del [weight]"
let style = $7"0"

! cleanup from previous
set data/save
cancel data/noerror tmp_frequency_h.dat

! compute an index that numbers the histogram boxes on the desired output plot
! also cope with missing values ("MISSING()") and data below the minimums
! ("MAX()").  Data above the max is simply not read in the final commands
! because it lies beyond the number of points in the grid gindex
LET/QUIET vn = INT((vmax-vmin)/vdelta + 0.5) + 1
LET/QUIET vindex = MISSING(INT(($1-vmin)/vdelta + 0.5) + 1, 0) ! 1 to vn
LET/QUIET index = MAX(0, vindex) 

! weight function for each grid cell
LET/QUIET wt_index = $5"1"

! create an output file with all TS grid boxes represented in order
sp rm -f tmp_frequency_h.raw tmp_frequency_h.dat
LIST/QUIET/nohead/form=(F10.0,1PG14.7)/file=tmp_frequency_h.raw index, wt_index
LIST/QUIET/nohead/form=(F10.0,1PG14.7)/file=tmp_frequency_h.raw/append vn+1,0  ! MAX index + 1
sp sort -n tmp_frequency_h.raw | awk -f $FER_DIR/go/frequency.awk > tmp_frequency_h.dat
!  mz_rs_20101116+
! define the number of point here explicitly. Otherwise, errors from numerical
! precision can result
define axis/$6"y|X|Y|Z|T"=`vmin`:`vmax`/NPOINTS=101 yax
!define axis/$6"y|X|Y|Z|T"=`vmin`:`vmax`:`vdelta` yax
!  mz_rs_20101116-
define grid/$6"y|X|Y|Z|T"=yax gindex
set data/save
file/grid=gindex/var="-,wt_count" tmp_frequency_h.dat
set variable/title="Sum of Weights" wt_count
set data/restore

! clean up
set data/restore

IF `style EQ 0` THEN
  go bar_chart2_rs ($1) plot/line wt_count[d=tmp_frequency_h.dat] $6"y|X|Y|Z|T"
ELSE
  go bar_chart2_rs ($1) plot/line LOG(wt_count[d=tmp_frequency_h.dat]) $6"y|X|Y|Z|T"
ENDIF

set mode/last verify
