# Supplementary material for: Oxidation of low-molecular weight organic compounds in clouddroplets: development of the JAMOC chemical mechanism inCAABA/MECCA (version 4.5.0gmdd)
Source: Copernicus journal article supplement (doi:10.5194/gmd-2020-337), 2020-10-29
Supplement: Supplementary file 20 [file gmd-2020-337-supplement.zip › caaba_4.5.0gmdd/jnl/tools/initialize.jnl]

!*******************************************************************************

! nsensi must be defined before calling this code:
IF ($nsensi%TRUE|*>FALSE%) THEN 
  SAY You must define the SYMBOL nsensi (e.g. via _define_sensi.jnl)
  EXIT/PROMPT 
ENDIF

! decrement nsensi by 1 because the run0 is not counted as a sensitivity run:
DEFINE SYMBOL nsensi = `($nsensi)-1`

! define dash types:
DEFINE SYMBOL dashtype1 = (0.05,0.05,0.05,0.05)
DEFINE SYMBOL dashtype2 = (0.07,0.07,0.07,0.07)
DEFINE SYMBOL dashtype3 = (0.09,0.09,0.09,0.09)
DEFINE SYMBOL dashtype4 = (0.11,0.11,0.11,0.11)
DEFINE SYMBOL dashtype5 = (0.13,0.13,0.13,0.13)
DEFINE SYMBOL dashtype6 = (0.15,0.15,0.15,0.15)
DEFINE SYMBOL dashtype7 = (0.17,0.17,0.17,0.17)
DEFINE SYMBOL dashtype8 = (0.19,0.19,0.19,0.19)
DEFINE SYMBOL dashtype9 = (0.21,0.21,0.21,0.21)

! IF undefined, SET default values
IF ($plotlon%TRUE|*>FALSE%)       THEN DEFINE SYMBOL plotlon    = 1
IF ($plotlat%TRUE|*>FALSE%)       THEN DEFINE SYMBOL plotlat    = 1

IF ($plotlevel%TRUE|*>FALSE%)     THEN DEFINE SYMBOL plotlevel  = 1
IF ($startlevel%TRUE|*>FALSE%)    THEN DEFINE SYMBOL startlevel = 0
IF ($endlevel%TRUE|*>FALSE%)      THEN DEFINE SYMBOL endlevel   = 999999

IF ($plotday%TRUE|*>FALSE%)       THEN DEFINE SYMBOL plotday    = 0
IF ($startday%TRUE|*>FALSE%)      THEN DEFINE SYMBOL startday   = 01-jan-1900 00:00
IF ($endday%TRUE|*>FALSE%)        THEN DEFINE SYMBOL endday     = 31-dec-2222 00:00

IF ($diffplot%TRUE|*>FALSE%)      THEN DEFINE SYMBOL diffplot      = FALSE
IF ($rangeinfo%TRUE|*>FALSE%)     THEN DEFINE SYMBOL rangeinfo     = TRUE
IF ($undefinedinfo%TRUE|*>FALSE%) THEN DEFINE SYMBOL undefinedinfo = TRUE

!*******************************************************************************

! print some info

SAY run0 = ($run0)
IF `($nsensi) GT 0` THEN ! for PLOT/OVER
  REPEAT/range=1:($nsensi)/name=dnum ( \
    DEFINE SYMBOL dnum = `dnum` ; \ ! convert VARIABLE to SYMBOL
    SAY run($dnum) = ($run($dnum)) )
ENDIF

SAY plotlon       = ($plotlon)
SAY plotlat       = ($plotlat)
SAY plotlevel     = ($plotlevel)
SAY startlevel    = ($startlevel)
SAY endlevel      = ($endlevel)
SAY plotday       = ($plotday)
SAY startday      = ($startday)
SAY endday        = ($endday)
SAY rangeinfo     = ($rangeinfo)
SAY undefinedinfo = ($undefinedinfo)

!*******************************************************************************
