# Supplementary material for: Oxidation of low-molecular weight organic compounds in clouddroplets: development of the JAMOC chemical mechanism inCAABA/MECCA (version 4.5.0gmdd)
Source: Copernicus journal article supplement (doi:10.5194/gmd-2020-337), 2020-10-29
Supplement: Supplementary file 20 [file gmd-2020-337-supplement.zip › caaba_4.5.0gmdd/jnl/tools/initviewport.jnl]

LET viewport_columns = $1
LET viewport_rows = $2
REPEAT/i=1:`viewport_columns*viewport_rows`:1 (CANCEL viewport `i`)
!GO portraitNxN `viewport_columns` `viewport_rows`
!GO portraitNxN `viewport_columns` `viewport_rows` 0 0 `768/1024` ! screen
GO portraitNxN `viewport_columns` `viewport_rows` 0 0 $4"`296/210`" ! A4 portrait
LET currentviewport = 0
LET currentpage = 1

! header for each PLOT page?
DEFINE SYMBOL pageheader = $3"noheader|header|noheader|smallheader"

DEFINE SYMBOL tmp     = `{spawn: "echo $HOME/tmp"}`
DEFINE SYMBOL tooldir = `{spawn: "echo $PWD/tools"}`

SAY "directory for PLOT files is ($tmp)"

SAY "deleting old ($tmp)/page*.plt files (if any)"
SPAWN rm -f ($tmp)/page*.plt

SET MODE metafile:($tmp)/page1001.plt
