# Supplementary material for: Oxidation of low-molecular weight organic compounds in clouddroplets: development of the JAMOC chemical mechanism inCAABA/MECCA (version 4.5.0gmdd)
Source: Copernicus journal article supplement (doi:10.5194/gmd-2020-337), 2020-10-29
Supplement: Supplementary file 20 [file gmd-2020-337-supplement.zip › caaba_4.5.0gmdd/jnl/tools/median.jnl]

! http://www.pmel.noaa.gov/maillists/tmap/ferret_users/fu_2009/msg00713.html
! Usage: go median variable_1d [quantile var_out]
!                          $1    [   $2      $3   ]
! Return a quantile (median) of a one-dimensional variable.
! The quantile value is interpolated if necessary.
! Default is the median (0.5 quantile).

let q_idx = 1 + $2".5" * (`$1,r=lend`-1)
let q_sort = samplel($1,sortl(($1)))
let q_val = q_sort[t=`q_idx`]
let $3"median" = `q_val`
