# Supplementary material for: Oxidation of low-molecular weight organic compounds in clouddroplets: development of the JAMOC chemical mechanism inCAABA/MECCA (version 4.5.0gmdd)
Source: Copernicus journal article supplement (doi:10.5194/gmd-2020-337), 2020-10-29
Supplement: Supplementary file 20 [file gmd-2020-337-supplement.zip › caaba_4.5.0gmdd/jnl/tools/nextviewport.jnl]

LET currentviewport = `currentviewport+1`
IF `currentviewport GT viewport_columns * viewport_rows` THEN
  IF ($nopause%FALSE|*>TRUE|%) THEN
    ! nopause has been defined
    SAY "finished page `currentpage`"
  ELSE
    ! nopause is undefined
    pause/quiet "finished page `currentpage`, press <RETURN> to continue"
  ENDIF
  LET currentpage = `currentpage+1`
  LET currentviewport = 1
  CANCEL MODE metafile                     ! close previous plt file
  SET MODE metafile:($tmp)/page`currentpage+1000`.plt  ! open next plt file
  SET WINDOW/clear
ENDIF
SET viewport `currentviewport`

! at the beginning of a new page, PLOT a header
IF ($pageheader%|header>TRUE|smallheader>TRUE|*>FALSE|%) THEN
  IF `currentviewport EQ 1` THEN
    GO margins 0 0 0 0 !top bottom left right
    PLOT/I=0:100/hlimits=0:100/vlimits=0:100/noaxis/nolabels 0 !empty PLOT
    ! @P2 (pen2) prints in red: LABEL 50, 60, 0, 0, .2  @P2MY SIN PLOT
    ! symbols in PPL syntax: LABEL ...  date: 'DATE' at 'TIME'
    !LABEL xpos,ypos,center,angle,size text
    LET topline    = 90
    LET bottomline = 10
    LET delta      = (topline-bottomline) / (3+($nsensi))
    ! "0*i" is added because the expression must be f(i), i.e. a function of i
    PLOT/hlimits=0:100/vlimits=0:100/noaxis/nolabels/I=0:15 topline-2*delta+0*i
    REPEAT/range=1:($nsensi)/name=dnum ( \
      DEFINE SYMBOL dnum = `dnum` ; \ ! convert VARIABLE to SYMBOL
      PLOT/OVER/DASH=($dashtype($dnum))/nolabels/I=0:15 \
        topline-(2+dnum)*delta+0*i )
    ! @as prevents special meaning of _ and ^
    !LABEL xpos,ypos,center,angle,size text
    IF ($pageheader%|header>TRUE|*>FALSE|%) THEN
      LABEL 50, `topline`,          0, 0, .25 "@as($pagetitle%???%)"
      LABEL  0, `topline-delta`,   -1, 0, .18 "@asGO ($jnlfile%???%) ($argv% %)"
    ENDIF
    REPEAT/range=0:($nsensi)/name=dnum ( \
      DEFINE SYMBOL dnum = `dnum` ; \ ! convert VARIABLE to SYMBOL
      DEFINE SYMBOL currentline = `topline-(2+dnum)*delta` ; \
      LABEL 15, ($currentline), -1, 0, .18 "@as ($run($dnum)_short)")
    ! LABEL  0, 35, -1, 0, .18 @as lon=`x[gx=lon,i=($plotlon%1%)]`, lat=`y[gy=lat,j=($plotlat%1%)]`
    ! LABEL  0, 25, -1, 0, .18 @as lev=($plotlevel%???%) OR JD=($plotday%???%)
    IF ($pageheader%|header>TRUE|*>FALSE|%) THEN
      LABEL 0, `bottomline`, -1, 0, .18 \
        "@as($DATE) at ($TIME), page `currentpage`"
    ENDIF
    LET currentviewport = 2
    SET viewport `currentviewport`
  ENDIF
ENDIF
