# Supplementary material for: Oxidation of low-molecular weight organic compounds in clouddroplets: development of the JAMOC chemical mechanism inCAABA/MECCA (version 4.5.0gmdd)
Source: Copernicus journal article supplement (doi:10.5194/gmd-2020-337), 2020-10-29
Supplement: Supplementary file 20 [file gmd-2020-337-supplement.zip › caaba_4.5.0gmdd/jnl/tools/plt_mergeto_pdf]

#! /bin/tcsh -f
# -*- Shell-script -*- Time-stamp: <2014-02-19 14:14:41 sander>

if ( "$2" == "" ) then
  echo "usage:"
  echo "  plt_mergeto_pdf <outfilename> [portrait|landscape]"
  exit
endif

# type outfile with or without extension:
# note that ":r" only works for names with only one dot
set outfile = "$1:t:r"

if ( "$2" == "landscape" ) set landscape

set tmpfile = tmp_file.txt

echo "converting all *.plt to *.ps"
foreach pltfile (page*.plt)
  set basename = `basename $pltfile .plt`
  #echo "working on $basename.plt"

  # check if pltfile contains illegal "nan" values:
  grep -i nan $basename.plt > $tmpfile
  if ( -s $tmpfile != 0 ) then
    echo "WARNING: $basename.plt contains 'nan'"
    echo "         (replacing 'nan' with '0')"
    mv -f $basename.plt $tmpfile
    sed 's/nan/0/g' $tmpfile > $basename.plt
  endif

  if ${?landscape} then
    gksm2ps -p landscape -l cps -R -o $basename.ps_raw $basename.plt
  else
    gksm2ps -p portrait  -l cps -R -o $basename.ps_raw $basename.plt
  endif
  # improve postscript file:
  ps2ps $basename.ps_raw $basename.ps
  # remove temporary file:
  rm $basename.ps_raw
end
echo "merging all *.ps into $outfile.ps"
# (no space after "-o"):
psmerge -o$outfile.ps page*.ps
echo "converting $outfile.ps to $outfile.pdf"
ps2pdf $outfile.ps $outfile.pdf
gzip -f $outfile.ps

# remove temporary files:
rm tmp_*
rm page*.ps

exit
