# Supplementary material for: Oxidation of low-molecular weight organic compounds in clouddroplets: development of the JAMOC chemical mechanism inCAABA/MECCA (version 4.5.0gmdd)
Source: Copernicus journal article supplement (doi:10.5194/gmd-2020-337), 2020-10-29
Supplement: Supplementary file 20 [file gmd-2020-337-supplement.zip › caaba_4.5.0gmdd/jnl/tools/README]

To have this ferret tools directory available in all ferret scripts, add
the following line to ~/.tcshrc (after installing ferret via soft.init):

if ( ${?FER_GO} ) then
  setenv FER_GO "$FER_GO /MYPATH/tools"
else
  setenv FER_GO "/MYPATH/tools"
endif

Alternatively, you can create a link to this directory and include the
tools directory in $FER_GO:

cd <my-ferret-files-dir>
ln -s $HOME/ferret/tools .
setenv FER_GO "$FER_GO ./tools"
