# Supplementary material for: Oxidation of low-molecular weight organic compounds in clouddroplets: development of the JAMOC chemical mechanism inCAABA/MECCA (version 4.5.0gmdd)
Source: Copernicus journal article supplement (doi:10.5194/gmd-2020-337), 2020-10-29
Supplement: Supplementary file 20 [file gmd-2020-337-supplement.zip › caaba_4.5.0gmdd/jnl/tools/regresst_rs.jnl]

\CANCEL MODE VERIFY 

! based on $FER_DIR/go/regresst.jnl, changed by Rolf Sander

! Description:  define FERRET variables for regression along the T axis
! updated 10/93 for Ferret V3.01
! 10/09 More-robust computations of variance using the Ferret @VAR transform

! say ... Linear Regression Along the T Axis
! say ... Instructions:
! say Use the LET command to define new variables
! say Define the variable P as your independent (X) variable
! say Define the variable Q as your   dependent (Y) variable
! say Results will be variables "SLOPE", "INTERCEP" and "RSQUARE"
! say QHAT will be the regression estimate
! say Note: If "T" is your independent variable then
! say ...   "SET GRID Q" after defining Q.
! say ... 

let pq = p*q
let pqmask = pq-pq  ! 0 or "missing" so all variables share the same missing
let pmasked = p + pqmask
let qmasked = q + pqmask
let pp = pmasked*pmasked
let qq = qmasked*qmasked

let pave = pmasked[t=@ave]
let qave = qmasked[t=@ave]

let pdev=pmasked-pave
let qdev=qmasked-qave
let pdevqdev=pdev*qdev
let pqvar=pdevqdev[t=@ave]
let pvar=pmasked[t=@var]
let qvar=qmasked[t=@var] 

let slope = pqvar / pvar
let intercep = qave - slope*pave
let qhat = slope*p + intercep
! original rsquare doesn't work because of numerical precision:
!let rsquare = (pqvar*pqvar) / (pvar*qvar)
let rsquare = (pqvar/pvar) * (pqvar/qvar)

SET MODE/LAST VERIFY
