# Supplementary material for: Oxidation of low-molecular weight organic compounds in clouddroplets: development of the JAMOC chemical mechanism inCAABA/MECCA (version 4.5.0gmdd)
Source: Copernicus journal article supplement (doi:10.5194/gmd-2020-337), 2020-10-29
Supplement: Supplementary file 20 [file gmd-2020-337-supplement.zip › caaba_4.5.0gmdd/jnl/xxxg.jnl]

\CANCEL MODE verify ! like "unset echo" under unix
CANCEL DATA/ALL
CANCEL VARIABLE/ALL
CANCEL SYMBOL/ALL

! argument checking
DEFINE SYMBOL dim         = $1"0d|0d|1d|2d"
DEFINE SYMBOL unitacronym = $2"mpm|mpm|mpc|pa|"
DEFINE SYMBOL jnlfile     = xxxg
DEFINE SYMBOL argv        = ($dim) ($unitacronym)

! don't stop after each page:
DEFINE SYMBOL nopause = TRUE

! set makepdf to TRUE only for 1-page plots:
!DEFINE SYMBOL makepdf = TRUE

go setmodelrun
go initialize
USE "($run0)/caaba_messy.nc"     ! d=1 press,temp
! sensi first
DEFINE SYMBOL dsensi = 2 !data set number of first sensi (try `,RETURN=dsetnum`)
IF `($nsensi) GT 0` THEN ! for PLOT/OVER
  REPEAT/range=1:($nsensi)/name=dnum ( \
    DEFINE SYMBOL dnum = `dnum` ; \ ! convert VARIABLE to SYMBOL
    USE "($run($dnum))/caaba_mecca.nc" )
ENDIF
! base last because it must be the current data set
!USE "($run0)_tracer_gp.nc"
USE "($run0)/caaba_mecca.nc"
DEFINE SYMBOL dbase = `($nsensi)+2`
say base run = data set number ($dbase)

!GO initviewport 1 3 noheader
!GO initviewport 3 7 header
GO initviewport 3 7 smallheader
DEFINE SYMBOL pagetitle = gas phase
GO _mecca_spc ! DEFINE kpp variables

! DEFINE factor for conversion to selected unit
IF ($unitacronym%|mpm>TRUE|*>FALSE|%) THEN
  ! leave DATA as it is [mol/mol]
  LET conv = 1
  DEFINE SYMBOL unit = fromdataset
ENDIF
IF ($unitacronym%|mpc>TRUE|*>FALSE|%) THEN
  ! convert DATA to [molecules/cm3]
  LET conv = 6.022e23*1.e-6*press[d=1]/(8.314409*temp[d=1])
  DEFINE SYMBOL unit = mcl/cc
ENDIF
IF ($unitacronym%|pa>TRUE|*>FALSE|%) THEN
  ! convert DATA to partial pressure [Pa]
  LET conv = press[d=1]
  DEFINE SYMBOL unit = Pa
ENDIF
SAY unit = [($unit)]
LET factor = conv

! SET verbosity (higher values of v produce more plots)
LET v = 2

!-------------------------------------------------------------------------------

! DEFINE some families

! NOx
LET NOx = NO+NO2
SET VARIABLE/TITLE="NO_x"/UNITS="mol/mol" NOx

! NOy
LET NOy = NO+NO2+NO3+2*N2O5+HONO+HNO3+HNO4+PAN+ClNO2+BrNO2+ClNO3+BrNO3
SET VARIABLE/TITLE="NO_y"/UNITS="mol/mol" NOy

! Clx = total reactive chlorine (excludes HCl)
LET Clx = Cl+ClO+HOCl+2*Cl2O2+ClNO2+ClNO3+2*Cl2+OClO+BrCl+ICl
SET VARIABLE/TITLE="Cl_x"/UNITS="mol/mol" Clx

! Brx = total reactive bromine (excludes HBr)
LET Brx = Br+BrO+HOBr+BrNO2+BrNO3+2*Br2+BrCl+IBr
SET VARIABLE/TITLE="Br_x"/UNITS="mol/mol" Brx
! if IBr is undefind, ferret produces the message:
! *** NOTE: Ambiguous coordinates on X axis: BR+BRO+HOBR+...

! Ix = total reactive iodine (excludes HI)
LET Ix = Iod+IO+HOI+2*I2O2+HIO3+INO2+INO3+2*I2+ICl+IBr+OIO
SET VARIABLE/TITLE="I_x"/UNITS="mol/mol" Ix

! RGM
LET RGM = HgO+HgCl+HgCl2+HgBr+HgBr2+ClHgOBr+ClHgBr
SET VARIABLE/TITLE="RGM"/UNITS="mol/mol" RGM

! ! Cl/ClO ratio
! LET ClClO = Cl / ClO
! SET VARIABLE/UNITS="1"      ClClO
! SET VARIABLE/TITLE="Cl/ClO" ClClO
! ! Cl/(HO2*ClO) ratio
! LET ClClOHO2 = MIN( 1e9, Cl / (HO2*ClO))
! SET VARIABLE/UNITS="1"            ClClOHO2
! SET VARIABLE/TITLE="Cl/(HO2*ClO)" ClClOHO2

!-------------------------------------------------------------------------------

DEFINE SYMBOL saveunit = ($unit)
DEFINE SYMBOL unit = fromdataset
LET factor = 1

! IF `v GE 1` THEN GO _plot_($dim) ClClO
! IF `v GE 1` THEN GO _plot_($dim) ClClOHO2

DEFINE SYMBOL unit = ($saveunit)
LET factor = conv

!-------------------------------------------------------------------------------

IF `v GE 1` THEN Go _plot_($dim) em
! O
IF `v GE 2` THEN GO _plot_($dim) O1D
IF `v GE 4` THEN GO _plot_($dim) O3P
IF `v GE 3` THEN GO _plot_($dim) O2
IF `v GE 1` THEN GO _plot_($dim) O3
IF `v GE 1` THEN GO _plot_($dim) Op
IF `v GE 1` THEN GO _plot_($dim) O2p
! H
IF `v GE 3` THEN GO _plot_($dim) H
IF `v GE 2` THEN GO _plot_($dim) H2
IF `v GE 1` THEN GO _plot_($dim) OH
IF `v GE 1` THEN GO _plot_($dim) HO2
IF `v GE 2` THEN GO _plot_($dim) H2O
IF `v GE 1` THEN GO _plot_($dim) H2O2
! N
IF `v GE 1` THEN GO _plot_($dim) NOx
IF `v GE 1` THEN GO _plot_($dim) NOy
IF `v GE 3` THEN GO _plot_($dim) N
IF `v GE 3` THEN GO _plot_($dim) N2
IF `v GE 2` THEN GO _plot_($dim) NH3
IF `v GE 2` THEN GO _plot_($dim) N2O
IF `v GE 1` THEN GO _plot_($dim) NO
IF `v GE 1` THEN GO _plot_($dim) NO2
IF `v GE 1` THEN GO _plot_($dim) NO3
IF `v GE 1` THEN GO _plot_($dim) N2O5
IF `v GE 1` THEN GO _plot_($dim) HONO
IF `v GE 1` THEN GO _plot_($dim) HNO3
IF `v GE 2` THEN GO _plot_($dim) HNO4
IF `v GE 4` THEN GO _plot_($dim) NH2
IF `v GE 4` THEN GO _plot_($dim) HNO
IF `v GE 4` THEN GO _plot_($dim) NHOH
IF `v GE 4` THEN GO _plot_($dim) NH2O
IF `v GE 4` THEN GO _plot_($dim) NH2OH
IF `v GE 3` THEN GO _plot_($dim) Np
IF `v GE 3` THEN GO _plot_($dim) N2p
IF `v GE 3` THEN GO _plot_($dim) NOp
! 1C
IF `v GE 2` THEN GO _plot_($dim) CO
IF `v GE 2` THEN GO _plot_($dim) CO2
IF `v GE 2` THEN GO _plot_($dim) HCHO
IF `v GE 2` THEN GO _plot_($dim) HCOOH
IF `v GE 2` THEN GO _plot_($dim) CH2OO
IF `v GE 2` THEN GO _plot_($dim) CH2OOA
IF `v GE 2` THEN GO _plot_($dim) CH3
IF `v GE 2` THEN GO _plot_($dim) CH3O
IF `v GE 2` THEN GO _plot_($dim) CH3O2
IF `v GE 2` THEN GO _plot_($dim) HOCH2O2
IF `v GE 2` THEN GO _plot_($dim) CH4
IF `v GE 2` THEN GO _plot_($dim) CH3OH
IF `v GE 2` THEN GO _plot_($dim) CH3OOH
IF `v GE 2` THEN GO _plot_($dim) HOCH2OOH
IF `v GE 2` THEN GO _plot_($dim) HOCH2OH
! 1C (CHON)
IF `v GE 2` THEN GO _plot_($dim) CH3ONO
IF `v GE 2` THEN GO _plot_($dim) CH3NO3
IF `v GE 2` THEN GO _plot_($dim) CH3O2NO2
IF `v GE 2` THEN GO _plot_($dim) HOCH2O2NO2
IF `v GE 2` THEN GO _plot_($dim) HCN
IF `v GE 2` THEN GO _plot_($dim) CN
IF `v GE 2` THEN GO _plot_($dim) NCO
! 1C (lumped)
IF `v GE 2` THEN GO _plot_($dim) LCARBON
! 2C (CHO)
IF `v GE 2` THEN GO _plot_($dim) HCOCO3
IF `v GE 2` THEN GO _plot_($dim) HCOCO3A
IF `v GE 2` THEN GO _plot_($dim) HCOCO
IF `v GE 2` THEN GO _plot_($dim) C2H2
IF `v GE 2` THEN GO _plot_($dim) CH2CO
IF `v GE 2` THEN GO _plot_($dim) GLYOX
IF `v GE 2` THEN GO _plot_($dim) HCOCO2H
IF `v GE 2` THEN GO _plot_($dim) CHOOCHO
IF `v GE 2` THEN GO _plot_($dim) HCOCO3H
IF `v GE 2` THEN GO _plot_($dim) CH3CO
IF `v GE 2` THEN GO _plot_($dim) HOCH2CO
IF `v GE 2` THEN GO _plot_($dim) HOCHCHO
IF `v GE 2` THEN GO _plot_($dim) HCOCH2O2
IF `v GE 2` THEN GO _plot_($dim) CH3CO3
IF `v GE 2` THEN GO _plot_($dim) HOCH2CO3
IF `v GE 2` THEN GO _plot_($dim) HOOCH2CO3
IF `v GE 2` THEN GO _plot_($dim) C2H4
IF `v GE 2` THEN GO _plot_($dim) CH2CHOH
IF `v GE 2` THEN GO _plot_($dim) CH3CHO
IF `v GE 2` THEN GO _plot_($dim) CH3CO2H
IF `v GE 2` THEN GO _plot_($dim) HOCH2CHO
IF `v GE 2` THEN GO _plot_($dim) HOOCH2CHO
IF `v GE 2` THEN GO _plot_($dim) CH3CO3H
IF `v GE 2` THEN GO _plot_($dim) HOCH2CO2H
IF `v GE 2` THEN GO _plot_($dim) HOCH2CO3H
IF `v GE 2` THEN GO _plot_($dim) HOOCH2CO2H
IF `v GE 2` THEN GO _plot_($dim) HOOCH2CO3H
IF `v GE 2` THEN GO _plot_($dim) C2H5O2
IF `v GE 2` THEN GO _plot_($dim) HOCH2CH2O
IF `v GE 2` THEN GO _plot_($dim) HOCH2CH2O2
IF `v GE 2` THEN GO _plot_($dim) CH3CHOHO2
IF `v GE 2` THEN GO _plot_($dim) C2H6
IF `v GE 2` THEN GO _plot_($dim) C2H5OH
IF `v GE 2` THEN GO _plot_($dim) C2H5OOH
IF `v GE 2` THEN GO _plot_($dim) ETHGLY
IF `v GE 2` THEN GO _plot_($dim) HYETHO2H
IF `v GE 2` THEN GO _plot_($dim) CH3CHOHOOH
! 2C (CHON)
IF `v GE 2` THEN GO _plot_($dim) NCCH2O2
IF `v GE 2` THEN GO _plot_($dim) NO3CH2CO3
IF `v GE 2` THEN GO _plot_($dim) NO3CH2PAN
IF `v GE 2` THEN GO _plot_($dim) CH3CN
IF `v GE 2` THEN GO _plot_($dim) NO3CH2CHO
IF `v GE 2` THEN GO _plot_($dim) PAN
IF `v GE 2` THEN GO _plot_($dim) PHAN
IF `v GE 2` THEN GO _plot_($dim) ETHOHNO3
IF `v GE 2` THEN GO _plot_($dim) C2H5NO3
IF `v GE 2` THEN GO _plot_($dim) C2H5O2NO2
! 3C (CHO)
IF `v GE 2` THEN GO _plot_($dim) C33CO
IF `v GE 2` THEN GO _plot_($dim) CHOCOCH2O2
IF `v GE 2` THEN GO _plot_($dim) HCOCH2CO3
IF `v GE 2` THEN GO _plot_($dim) ALCOCH2OOH
IF `v GE 2` THEN GO _plot_($dim) MGLYOX
IF `v GE 2` THEN GO _plot_($dim) HOCH2COCHO
IF `v GE 2` THEN GO _plot_($dim) HCOCH2CHO
IF `v GE 2` THEN GO _plot_($dim) HCOCH2CO2H
IF `v GE 2` THEN GO _plot_($dim) HCOCH2CO3H
IF `v GE 2` THEN GO _plot_($dim) CH3COCH2O2
IF `v GE 2` THEN GO _plot_($dim) HOC2H4CO3
IF `v GE 2` THEN GO _plot_($dim) C3H6
IF `v GE 2` THEN GO _plot_($dim) CH3COCH3
IF `v GE 2` THEN GO _plot_($dim) ACETOL
IF `v GE 2` THEN GO _plot_($dim) HYPERACET
IF `v GE 2` THEN GO _plot_($dim) HOC2H4CO2H
IF `v GE 2` THEN GO _plot_($dim) HOC2H4CO3H
IF `v GE 2` THEN GO _plot_($dim) IC3H7O2
IF `v GE 2` THEN GO _plot_($dim) HYPROPO2
IF `v GE 2` THEN GO _plot_($dim) C3H8
IF `v GE 2` THEN GO _plot_($dim) IC3H7OOH
IF `v GE 2` THEN GO _plot_($dim) HYPROPO2H
IF `v GE 2` THEN GO _plot_($dim) CH3COCO3
IF `v GE 2` THEN GO _plot_($dim) CH3CHCO
IF `v GE 2` THEN GO _plot_($dim) CH3COCO2H
IF `v GE 2` THEN GO _plot_($dim) CH3COCO3H
IF `v GE 2` THEN GO _plot_($dim) HCOCOCH2OOH
IF `v GE 2` THEN GO _plot_($dim) C2H5CO3
IF `v GE 2` THEN GO _plot_($dim) HOCH2COCH2O2
IF `v GE 2` THEN GO _plot_($dim) C2H5CHO
IF `v GE 2` THEN GO _plot_($dim) PROPENOL
IF `v GE 2` THEN GO _plot_($dim) PROPACID
IF `v GE 2` THEN GO _plot_($dim) PERPROACID
IF `v GE 2` THEN GO _plot_($dim) HOCH2COCH2OOH
IF `v GE 2` THEN GO _plot_($dim) NC3H7O2
IF `v GE 2` THEN GO _plot_($dim) IPROPOL
IF `v GE 2` THEN GO _plot_($dim) NPROPOL
IF `v GE 2` THEN GO _plot_($dim) NC3H7OOH
! 3C (CHO) aromatics
IF `v GE 2` THEN GO _plot_($dim) C3DIALOOH
IF `v GE 2` THEN GO _plot_($dim) C3DIALO2
IF `v GE 2` THEN GO _plot_($dim) HCOCOHCO3
IF `v GE 2` THEN GO _plot_($dim) METACETHO
IF `v GE 2` THEN GO _plot_($dim) MGLOO
IF `v GE 2` THEN GO _plot_($dim) MGLYOO
IF `v GE 2` THEN GO _plot_($dim) C32OH13CO
IF `v GE 2` THEN GO _plot_($dim) HCOCOHCO3H
! 3C (CHON)
IF `v GE 2` THEN GO _plot_($dim) C3PAN2
IF `v GE 2` THEN GO _plot_($dim) NOA
IF `v GE 2` THEN GO _plot_($dim) CH3COCH2O2NO2
IF `v GE 2` THEN GO _plot_($dim) PPN
IF `v GE 2` THEN GO _plot_($dim) C3PAN1
IF `v GE 2` THEN GO _plot_($dim) PRONO3BO2
IF `v GE 2` THEN GO _plot_($dim) NC3H7NO3
IF `v GE 2` THEN GO _plot_($dim) IC3H7NO3
IF `v GE 2` THEN GO _plot_($dim) PROPOLNO3
IF `v GE 2` THEN GO _plot_($dim) PR2O2HNO3
! 3C (CHON) aromatics
IF `v GE 2` THEN GO _plot_($dim) HCOCOHPAN
! 4C (CHO)
IF `v GE 2` THEN GO _plot_($dim) C312COCO3
IF `v GE 2` THEN GO _plot_($dim) HCOCCH3CO
IF `v GE 2` THEN GO _plot_($dim) CH3COCHCO
IF `v GE 2` THEN GO _plot_($dim) C4CODIAL
IF `v GE 2` THEN GO _plot_($dim) CO23C3CHO
IF `v GE 2` THEN GO _plot_($dim) C312COCO3H
IF `v GE 2` THEN GO _plot_($dim) MACO2
IF `v GE 2` THEN GO _plot_($dim) EZCH3CO2CHCHO
IF `v GE 2` THEN GO _plot_($dim) EZCHOCCH3CHO2
IF `v GE 2` THEN GO _plot_($dim) CO2H3CHO
IF `v GE 2` THEN GO _plot_($dim) MACO3
IF `v GE 2` THEN GO _plot_($dim) CH3COCHO2CHO
IF `v GE 2` THEN GO _plot_($dim) HCOCO2CH3CHO
IF `v GE 2` THEN GO _plot_($dim) BIACETO2
IF `v GE 2` THEN GO _plot_($dim) CHOC3COO2
IF `v GE 2` THEN GO _plot_($dim) C44O2
IF `v GE 2` THEN GO _plot_($dim) CO2H3CO3
IF `v GE 2` THEN GO _plot_($dim) MACR
IF `v GE 2` THEN GO _plot_($dim) MVK
IF `v GE 2` THEN GO _plot_($dim) BIACET
IF `v GE 2` THEN GO _plot_($dim) MACO2H
IF `v GE 2` THEN GO _plot_($dim) MVKOH
IF `v GE 2` THEN GO _plot_($dim) HVMK
IF `v GE 2` THEN GO _plot_($dim) HMAC
IF `v GE 2` THEN GO _plot_($dim) CO2C3CHO
IF `v GE 2` THEN GO _plot_($dim) IBUTDIAL
IF `v GE 2` THEN GO _plot_($dim) MACO3H
IF `v GE 2` THEN GO _plot_($dim) BIACETOH
IF `v GE 2` THEN GO _plot_($dim) CH3COOHCHCHO
IF `v GE 2` THEN GO _plot_($dim) HCOCCH3CHOOH
IF `v GE 2` THEN GO _plot_($dim) C413COOOH
IF `v GE 2` THEN GO _plot_($dim) BIACETOOH
IF `v GE 2` THEN GO _plot_($dim) CH3COCOCO2H
IF `v GE 2` THEN GO _plot_($dim) CO2H3CO2H
IF `v GE 2` THEN GO _plot_($dim) C44OOH
IF `v GE 2` THEN GO _plot_($dim) CO2H3CO3H
IF `v GE 2` THEN GO _plot_($dim) MACRO
IF `v GE 2` THEN GO _plot_($dim) IPRCO3
IF `v GE 2` THEN GO _plot_($dim) MACRO2
IF `v GE 2` THEN GO _plot_($dim) IPRHOCO3
IF `v GE 2` THEN GO _plot_($dim) MACRNO3
IF `v GE 2` THEN GO _plot_($dim) MVKNO3
IF `v GE 2` THEN GO _plot_($dim) PIPN
IF `v GE 2` THEN GO _plot_($dim) MEK
IF `v GE 2` THEN GO _plot_($dim) HO12CO3C4
IF `v GE 2` THEN GO _plot_($dim) MACROH
IF `v GE 2` THEN GO _plot_($dim) MACROOH
IF `v GE 2` THEN GO _plot_($dim) MEPROPENE
IF `v GE 2` THEN GO _plot_($dim) BUT1ENE
IF `v GE 2` THEN GO _plot_($dim) CBUT2ENE
IF `v GE 2` THEN GO _plot_($dim) TBUT2ENE
IF `v GE 2` THEN GO _plot_($dim) BUTENOL
IF `v GE 2` THEN GO _plot_($dim) C3H7CHO
IF `v GE 2` THEN GO _plot_($dim) IPRCHO
IF `v GE 2` THEN GO _plot_($dim) MPROPENOL
IF `v GE 2` THEN GO _plot_($dim) IBUTALOH
IF `v GE 2` THEN GO _plot_($dim) MBOOO
IF `v GE 2` THEN GO _plot_($dim) BUT2OLO
IF `v GE 2` THEN GO _plot_($dim) PERIBUACID
IF `v GE 2` THEN GO _plot_($dim) IPRHOCO2H
IF `v GE 2` THEN GO _plot_($dim) IPRHOCO3H
IF `v GE 2` THEN GO _plot_($dim) IBUTOLBO2
IF `v GE 2` THEN GO _plot_($dim) BUT2OLO2
IF `v GE 2` THEN GO _plot_($dim) TC4H9O2
IF `v GE 2` THEN GO _plot_($dim) IC4H9O2
IF `v GE 2` THEN GO _plot_($dim) IC4H9NO3
IF `v GE 2` THEN GO _plot_($dim) TC4H9NO3
IF `v GE 2` THEN GO _plot_($dim) BUT2OLNO3
IF `v GE 2` THEN GO _plot_($dim) NC4H10
IF `v GE 2` THEN GO _plot_($dim) IC4H10
IF `v GE 2` THEN GO _plot_($dim) TC4H9OOH
IF `v GE 2` THEN GO _plot_($dim) IC4H9OOH
IF `v GE 2` THEN GO _plot_($dim) IBUTOLBOOH
IF `v GE 2` THEN GO _plot_($dim) BUT2OLOOH
! 4C (CHO) aromatics
IF `v GE 2` THEN GO _plot_($dim) MALANHY
IF `v GE 2` THEN GO _plot_($dim) CO2C4DIAL
IF `v GE 2` THEN GO _plot_($dim) MALNHYOHCO
IF `v GE 2` THEN GO _plot_($dim) MALDIALCO3
IF `v GE 2` THEN GO _plot_($dim) EPXDLCO3
IF `v GE 2` THEN GO _plot_($dim) MALANHYO2
IF `v GE 2` THEN GO _plot_($dim) BZFUONE
IF `v GE 2` THEN GO _plot_($dim) MALDIAL
IF `v GE 2` THEN GO _plot_($dim) MALDALCO2H
IF `v GE 2` THEN GO _plot_($dim) EPXC4DIAL
IF `v GE 2` THEN GO _plot_($dim) HOCOC4DIAL
IF `v GE 2` THEN GO _plot_($dim) MALDALCO3H
IF `v GE 2` THEN GO _plot_($dim) BZFUCO
IF `v GE 2` THEN GO _plot_($dim) EPXDLCO2H
IF `v GE 2` THEN GO _plot_($dim) CO14O3CHO
IF `v GE 2` THEN GO _plot_($dim) CO14O3CO2H
IF `v GE 2` THEN GO _plot_($dim) EPXDLCO3H
IF `v GE 2` THEN GO _plot_($dim) MALANHYOOH
IF `v GE 2` THEN GO _plot_($dim) BZFUO2
IF `v GE 2` THEN GO _plot_($dim) MECOACETO2
IF `v GE 2` THEN GO _plot_($dim) MALDIALO2
IF `v GE 2` THEN GO _plot_($dim) MALDIALOOH
IF `v GE 2` THEN GO _plot_($dim) BZFUOOH
IF `v GE 2` THEN GO _plot_($dim) MECOACEOOH
! 4C (CHON)
IF `v GE 2` THEN GO _plot_($dim) C312COPAN
IF `v GE 2` THEN GO _plot_($dim) MPAN
IF `v GE 2` THEN GO _plot_($dim) IBUTOLBNO3
IF `v GE 2` THEN GO _plot_($dim) C4PAN5
! 4C (CHON) aromatics
IF `v GE 2` THEN GO _plot_($dim) NC4DCO2H
IF `v GE 2` THEN GO _plot_($dim) MALDIALPAN
IF `v GE 2` THEN GO _plot_($dim) NBZFUONE
IF `v GE 2` THEN GO _plot_($dim) EPXDLPAN
IF `v GE 2` THEN GO _plot_($dim) NBZFUO2
IF `v GE 2` THEN GO _plot_($dim) NBZFUOOH
! 4C (CHO) (lumped)
IF `v GE 2` THEN GO _plot_($dim) LMEKO2
IF `v GE 2` THEN GO _plot_($dim) LHMVKABO2
IF `v GE 2` THEN GO _plot_($dim) LMEKOOH
IF `v GE 2` THEN GO _plot_($dim) LHMVKABOOH
IF `v GE 2` THEN GO _plot_($dim) LMVKOHABOOH
IF `v GE 2` THEN GO _plot_($dim) LC4H9O2
IF `v GE 2` THEN GO _plot_($dim) LC4H9OOH
IF `v GE 2` THEN GO _plot_($dim) LBUT1ENO2
IF `v GE 2` THEN GO _plot_($dim) LBUT1ENOOH
! 4C (CHON) (lumped)
IF `v GE 2` THEN GO _plot_($dim) LMEKNO3
IF `v GE 2` THEN GO _plot_($dim) LC4H9NO3
IF `v GE 2` THEN GO _plot_($dim) LBUT1ENNO3
! 5C (CHO)
IF `v GE 2` THEN GO _plot_($dim) LZCO3C23DBCOD
IF `v GE 2` THEN GO _plot_($dim) CHOC3COCO3
IF `v GE 2` THEN GO _plot_($dim) CO23C4CO3
IF `v GE 2` THEN GO _plot_($dim) ME3FURAN
IF `v GE 2` THEN GO _plot_($dim) C4MDIAL
IF `v GE 2` THEN GO _plot_($dim) CO13C4CHO
IF `v GE 2` THEN GO _plot_($dim) CO23C4CHO
IF `v GE 2` THEN GO _plot_($dim) LZCO3HC23DBCOD
IF `v GE 2` THEN GO _plot_($dim) C513CO
IF `v GE 2` THEN GO _plot_($dim) CHOC3COOOH
IF `v GE 2` THEN GO _plot_($dim) CO23C4CO3H
IF `v GE 2` THEN GO _plot_($dim) C511O2
IF `v GE 2` THEN GO _plot_($dim) C512O2
IF `v GE 2` THEN GO _plot_($dim) C514O2
IF `v GE 2` THEN GO _plot_($dim) C1ODC2O2C4OD
IF `v GE 2` THEN GO _plot_($dim) C513O2
IF `v GE 2` THEN GO _plot_($dim) C5H8
IF `v GE 2` THEN GO _plot_($dim) HCOC5
IF `v GE 2` THEN GO _plot_($dim) LZCODC23DBCOOH
IF `v GE 2` THEN GO _plot_($dim) MBOCOCO
IF `v GE 2` THEN GO _plot_($dim) C511OOH
IF `v GE 2` THEN GO _plot_($dim) C514OOH
IF `v GE 2` THEN GO _plot_($dim) C512OOH
IF `v GE 2` THEN GO _plot_($dim) C1ODC2OOHC4OD
IF `v GE 2` THEN GO _plot_($dim) C513OOH
IF `v GE 2` THEN GO _plot_($dim) LISOPAB
IF `v GE 2` THEN GO _plot_($dim) LISOPCD
IF `v GE 2` THEN GO _plot_($dim) ISOPBO2
IF `v GE 2` THEN GO _plot_($dim) ISOPDO2
IF `v GE 2` THEN GO _plot_($dim) DB1O
IF `v GE 2` THEN GO _plot_($dim) DB1O2
IF `v GE 2` THEN GO _plot_($dim) C1ODC2O2C4OOH
IF `v GE 2` THEN GO _plot_($dim) C1OOHC3O2C4OD
IF `v GE 2` THEN GO _plot_($dim) C59O2
IF `v GE 2` THEN GO _plot_($dim) DB2O2
IF `v GE 2` THEN GO _plot_($dim) C1ODC3O2C4OOH
IF `v GE 2` THEN GO _plot_($dim) C1OOHC2O2C4OD
IF `v GE 2` THEN GO _plot_($dim) MBO
IF `v GE 2` THEN GO _plot_($dim) ISOPAOH
IF `v GE 2` THEN GO _plot_($dim) ISOPBOH
IF `v GE 2` THEN GO _plot_($dim) ISOPDOH
IF `v GE 2` THEN GO _plot_($dim) ISOPBOOH
IF `v GE 2` THEN GO _plot_($dim) ISOPDOOH
IF `v GE 2` THEN GO _plot_($dim) MBOACO
IF `v GE 2` THEN GO _plot_($dim) DB1OOH
IF `v GE 2` THEN GO _plot_($dim) C59OOH
IF `v GE 2` THEN GO _plot_($dim) C1OOHC2OOHC4OD
IF `v GE 2` THEN GO _plot_($dim) DB2OOH
! 5C aromatics (CHO)
IF `v GE 2` THEN GO _plot_($dim) C4CO2DBCO3
IF `v GE 2` THEN GO _plot_($dim) MMALANHY
IF `v GE 2` THEN GO _plot_($dim) C54CO
IF `v GE 2` THEN GO _plot_($dim) C4CO2DCO3H
IF `v GE 2` THEN GO _plot_($dim) C5DIALCO
IF `v GE 2` THEN GO _plot_($dim) C5DIALO2
IF `v GE 2` THEN GO _plot_($dim) C5CO14O2
IF `v GE 2` THEN GO _plot_($dim) ACCOMECO3
IF `v GE 2` THEN GO _plot_($dim) MMALANHYO2
IF `v GE 2` THEN GO _plot_($dim) TLFUONE
IF `v GE 2` THEN GO _plot_($dim) C5DICARB
IF `v GE 2` THEN GO _plot_($dim) MC3ODBCO2H
IF `v GE 2` THEN GO _plot_($dim) C5CO14OH
IF `v GE 2` THEN GO _plot_($dim) C5134CO2OH
IF `v GE 2` THEN GO _plot_($dim) C5DIALOOH
IF `v GE 2` THEN GO _plot_($dim) ACCOMECHO
IF `v GE 2` THEN GO _plot_($dim) C5CO14OOH
IF `v GE 2` THEN GO _plot_($dim) C24O3CCO2H
IF `v GE 2` THEN GO _plot_($dim) TLFUONOO
IF `v GE 2` THEN GO _plot_($dim) MMALNHYOOH
IF `v GE 2` THEN GO _plot_($dim) ACCOMECO3H
IF `v GE 2` THEN GO _plot_($dim) C4M2ALOHO2
IF `v GE 2` THEN GO _plot_($dim) C5DICARBO2
IF `v GE 2` THEN GO _plot_($dim) TLFUO2
IF `v GE 2` THEN GO _plot_($dim) TLFUOOH
IF `v GE 2` THEN GO _plot_($dim) C5DICAROOH
IF `v GE 2` THEN GO _plot_($dim) C4MALOHOOH
! 5C (CHON)
IF `v GE 2` THEN GO _plot_($dim) CHOC3COPAN
IF `v GE 2` THEN GO _plot_($dim) LZCPANC23DBCOD
IF `v GE 2` THEN GO _plot_($dim) C5PAN9
IF `v GE 2` THEN GO _plot_($dim) NC4CHO
IF `v GE 2` THEN GO _plot_($dim) C514NO3
IF `v GE 2` THEN GO _plot_($dim) NISOPO2
IF `v GE 2` THEN GO _plot_($dim) NC4OHCO3
IF `v GE 2` THEN GO _plot_($dim) NC4OHCPAN
IF `v GE 2` THEN GO _plot_($dim) ISOPBNO3
IF `v GE 2` THEN GO _plot_($dim) ISOPDNO3
IF `v GE 2` THEN GO _plot_($dim) NISOPOOH
IF `v GE 2` THEN GO _plot_($dim) NMBOBCO
IF `v GE 2` THEN GO _plot_($dim) C4MCONO3OH
IF `v GE 2` THEN GO _plot_($dim) DB1NO3
IF `v GE 2` THEN GO _plot_($dim) NC4OHCO3H
IF `v GE 2` THEN GO _plot_($dim) ISOPBDNO3O2
! 5C aromatics (CHON)
IF `v GE 2` THEN GO _plot_($dim) C4CO2DBPAN
IF `v GE 2` THEN GO _plot_($dim) NC4MDCO2H
IF `v GE 2` THEN GO _plot_($dim) C5COO2NO2
IF `v GE 2` THEN GO _plot_($dim) ACCOMEPAN
IF `v GE 2` THEN GO _plot_($dim) MC3CODBPAN
IF `v GE 2` THEN GO _plot_($dim) C3MCODBPAN
IF `v GE 2` THEN GO _plot_($dim) NTLFUO2
IF `v GE 2` THEN GO _plot_($dim) NTLFUOOH
! 5C (CHO) (lumped)
IF `v GE 2` THEN GO _plot_($dim) LME3FURANO2
IF `v GE 2` THEN GO _plot_($dim) LHC4ACCO3
IF `v GE 2` THEN GO _plot_($dim) LHC4ACCHO
IF `v GE 2` THEN GO _plot_($dim) LHC4ACCO2H
IF `v GE 2` THEN GO _plot_($dim) LHC4ACCO3H
IF `v GE 2` THEN GO _plot_($dim) LISOPACO
IF `v GE 2` THEN GO _plot_($dim) LDISOPACO
IF `v GE 2` THEN GO _plot_($dim) LISOPEFO
IF `v GE 2` THEN GO _plot_($dim) LISOPACO2
IF `v GE 2` THEN GO _plot_($dim) LDISOPACO2
IF `v GE 2` THEN GO _plot_($dim) LISOPEFO2
IF `v GE 2` THEN GO _plot_($dim) LC578O2
IF `v GE 2` THEN GO _plot_($dim) LIEPOX
IF `v GE 2` THEN GO _plot_($dim) LISOPACOOH
IF `v GE 2` THEN GO _plot_($dim) LC578OOH
IF `v GE 2` THEN GO _plot_($dim) LMBOABO2
IF `v GE 2` THEN GO _plot_($dim) LMBOABOOH
! 5C (CHON) (lumped)
IF `v GE 2` THEN GO _plot_($dim) LC5PAN1719
IF `v GE 2` THEN GO _plot_($dim) LISOPACNO3
IF `v GE 2` THEN GO _plot_($dim) LNMBOABO2
IF `v GE 2` THEN GO _plot_($dim) LNMBOABOOH
IF `v GE 2` THEN GO _plot_($dim) LISOPACNO3O2
IF `v GE 2` THEN GO _plot_($dim) LMBOABNO3
IF `v GE 2` THEN GO _plot_($dim) LNISO3
IF `v GE 2` THEN GO _plot_($dim) LNISOOH
! 6C (CHO)
IF `v GE 2` THEN GO _plot_($dim) CO235C5CHO
IF `v GE 2` THEN GO _plot_($dim) CO235C6O2
IF `v GE 2` THEN GO _plot_($dim) C614CO
IF `v GE 2` THEN GO _plot_($dim) CO235C6OOH
IF `v GE 2` THEN GO _plot_($dim) C614O2
IF `v GE 2` THEN GO _plot_($dim) C614OOH
! C6 (CHO) aromatics
IF `v GE 2` THEN GO _plot_($dim) PBZQONE
IF `v GE 2` THEN GO _plot_($dim) CATECHOL
IF `v GE 2` THEN GO _plot_($dim) C6CO4DB
IF `v GE 2` THEN GO _plot_($dim) PBZQCO
IF `v GE 2` THEN GO _plot_($dim) C6H5O
IF `v GE 2` THEN GO _plot_($dim) CATEC1O
IF `v GE 2` THEN GO _plot_($dim) C6H5O2
IF `v GE 2` THEN GO _plot_($dim) CATEC1O2
IF `v GE 2` THEN GO _plot_($dim) C5CO2DBCO3
IF `v GE 2` THEN GO _plot_($dim) PBZQO2
IF `v GE 2` THEN GO _plot_($dim) BZEMUCCO3
IF `v GE 2` THEN GO _plot_($dim) C5CO2DCO3H
IF `v GE 2` THEN GO _plot_($dim) C5CO2OHCO3
IF `v GE 2` THEN GO _plot_($dim) BENZENE
IF `v GE 2` THEN GO _plot_($dim) PHENOL
IF `v GE 2` THEN GO _plot_($dim) C6H5OOH
IF `v GE 2` THEN GO _plot_($dim) BZEPOXMUC
IF `v GE 2` THEN GO _plot_($dim) C6125CO
IF `v GE 2` THEN GO _plot_($dim) CATEC1OOH
IF `v GE 2` THEN GO _plot_($dim) BZEMUCCO2H
IF `v GE 2` THEN GO _plot_($dim) BZOBIPEROH
IF `v GE 2` THEN GO _plot_($dim) BZEMUCCO
IF `v GE 2` THEN GO _plot_($dim) PBZQOOH
IF `v GE 2` THEN GO _plot_($dim) BZEMUCCO3H
IF `v GE 2` THEN GO _plot_($dim) C5COOHCO3H
IF `v GE 2` THEN GO _plot_($dim) C615CO2O2
IF `v GE 2` THEN GO _plot_($dim) BZBIPERO2
IF `v GE 2` THEN GO _plot_($dim) PHENO2
IF `v GE 2` THEN GO _plot_($dim) BZEMUCO2
IF `v GE 2` THEN GO _plot_($dim) C615CO2OOH
IF `v GE 2` THEN GO _plot_($dim) BZBIPEROOH
IF `v GE 2` THEN GO _plot_($dim) PHENOOH
IF `v GE 2` THEN GO _plot_($dim) BZEMUCOOH
IF `v GE 2` THEN GO _plot_($dim) CPDKETENE
! 6C (CHON)
IF `v GE 2` THEN GO _plot_($dim) C614NO3
! C6 (CHON) aromatics
IF `v GE 2` THEN GO _plot_($dim) NPHEN1O
IF `v GE 2` THEN GO _plot_($dim) NPHEN1O2
IF `v GE 2` THEN GO _plot_($dim) DNPHEN
IF `v GE 2` THEN GO _plot_($dim) NBZQO2
IF `v GE 2` THEN GO _plot_($dim) NDNPHENO2
IF `v GE 2` THEN GO _plot_($dim) HOC6H4NO2
IF `v GE 2` THEN GO _plot_($dim) NCATECHOL
IF `v GE 2` THEN GO _plot_($dim) NPHEN1OOH
IF `v GE 2` THEN GO _plot_($dim) BZEMUCPAN
IF `v GE 2` THEN GO _plot_($dim) C5CO2DBPAN
IF `v GE 2` THEN GO _plot_($dim) NBZQOOH
IF `v GE 2` THEN GO _plot_($dim) C5CO2OHPAN
IF `v GE 2` THEN GO _plot_($dim) DNPHENO2
IF `v GE 2` THEN GO _plot_($dim) NNCATECO2
IF `v GE 2` THEN GO _plot_($dim) NDNPHENOOH
IF `v GE 2` THEN GO _plot_($dim) NPHENO2
IF `v GE 2` THEN GO _plot_($dim) NCATECO2
IF `v GE 2` THEN GO _plot_($dim) DNPHENOOH
IF `v GE 2` THEN GO _plot_($dim) NNCATECOOH
IF `v GE 2` THEN GO _plot_($dim) BZBIPERNO3
IF `v GE 2` THEN GO _plot_($dim) BZEMUCNO3
IF `v GE 2` THEN GO _plot_($dim) NPHENOOH
IF `v GE 2` THEN GO _plot_($dim) NCATECOOH
! 7C (CHO)
IF `v GE 2` THEN GO _plot_($dim) MCPDKETENE
IF `v GE 2` THEN GO _plot_($dim) CO235C6CO3
IF `v GE 2` THEN GO _plot_($dim) CO235C6CHO
IF `v GE 2` THEN GO _plot_($dim) C235C6CO3H
IF `v GE 2` THEN GO _plot_($dim) C716O2
IF `v GE 2` THEN GO _plot_($dim) C716OOH
IF `v GE 2` THEN GO _plot_($dim) ROO6R4P
IF `v GE 2` THEN GO _plot_($dim) ROO6R5P
IF `v GE 2` THEN GO _plot_($dim) ROO6R3O
IF `v GE 2` THEN GO _plot_($dim) C721O2
IF `v GE 2` THEN GO _plot_($dim) C722O2
IF `v GE 2` THEN GO _plot_($dim) ROO6R3O2
IF `v GE 2` THEN GO _plot_($dim) ROO6R5O2
IF `v GE 2` THEN GO _plot_($dim) C721OOH
IF `v GE 2` THEN GO _plot_($dim) C722OOH
IF `v GE 2` THEN GO _plot_($dim) ROO6R3OOH
! C7 (CHO) aromatics
IF `v GE 2` THEN GO _plot_($dim) C6H5CO3
IF `v GE 2` THEN GO _plot_($dim) BENZAL
IF `v GE 2` THEN GO _plot_($dim) PHCOOH
IF `v GE 2` THEN GO _plot_($dim) PTLQONE
IF `v GE 2` THEN GO _plot_($dim) C6H5CO3H
IF `v GE 2` THEN GO _plot_($dim) C7CO4DB
IF `v GE 2` THEN GO _plot_($dim) PTLQCO
IF `v GE 2` THEN GO _plot_($dim) TOL1O
IF `v GE 2` THEN GO _plot_($dim) OXYL1O2
IF `v GE 2` THEN GO _plot_($dim) C6H5CH2O2
IF `v GE 2` THEN GO _plot_($dim) MCATEC1O
IF `v GE 2` THEN GO _plot_($dim) MCATEC1O2
IF `v GE 2` THEN GO _plot_($dim) PTLQO2
IF `v GE 2` THEN GO _plot_($dim) TLEMUCCO3
IF `v GE 2` THEN GO _plot_($dim) C6CO2OHCO3
IF `v GE 2` THEN GO _plot_($dim) TOLUENE
IF `v GE 2` THEN GO _plot_($dim) CRESOL
IF `v GE 2` THEN GO _plot_($dim) C6H5CH2OH
IF `v GE 2` THEN GO _plot_($dim) OXYL1OOH
IF `v GE 2` THEN GO _plot_($dim) C6H5CH2OOH
IF `v GE 2` THEN GO _plot_($dim) MCATECHOL
IF `v GE 2` THEN GO _plot_($dim) TLEPOXMUC
IF `v GE 2` THEN GO _plot_($dim) MCATEC1OOH
IF `v GE 2` THEN GO _plot_($dim) PTLQOH
IF `v GE 2` THEN GO _plot_($dim) TLEMUCCO2H
IF `v GE 2` THEN GO _plot_($dim) TLOBIPEROH
IF `v GE 2` THEN GO _plot_($dim) PTLQOOH
IF `v GE 2` THEN GO _plot_($dim) TLEMUCCO
IF `v GE 2` THEN GO _plot_($dim) TLEMUCCO3H
IF `v GE 2` THEN GO _plot_($dim) C6COOHCO3H
IF `v GE 2` THEN GO _plot_($dim) TLBIPERO2
IF `v GE 2` THEN GO _plot_($dim) TLEMUCO2
IF `v GE 2` THEN GO _plot_($dim) CRESO2
IF `v GE 2` THEN GO _plot_($dim) TLBIPER2OH
IF `v GE 2` THEN GO _plot_($dim) TLEMUCOH
IF `v GE 2` THEN GO _plot_($dim) CRESOH
IF `v GE 2` THEN GO _plot_($dim) TLBIPEROOH
IF `v GE 2` THEN GO _plot_($dim) CRESOOH
IF `v GE 2` THEN GO _plot_($dim) TLEMUCOOH
! 7C (CHON)
IF `v GE 2` THEN GO _plot_($dim) C7PAN3
IF `v GE 2` THEN GO _plot_($dim) ROO6R3NO3
! C7 (CHON) aromatics
IF `v GE 2` THEN GO _plot_($dim) NCRESOOH
IF `v GE 2` THEN GO _plot_($dim) PBZN
IF `v GE 2` THEN GO _plot_($dim) NDNCRESO2
IF `v GE 2` THEN GO _plot_($dim) NCRES1O
IF `v GE 2` THEN GO _plot_($dim) NCRES1O2
IF `v GE 2` THEN GO _plot_($dim) DNCRES
IF `v GE 2` THEN GO _plot_($dim) MNCPDKETENE
IF `v GE 2` THEN GO _plot_($dim) NPTLQO2
IF `v GE 2` THEN GO _plot_($dim) TOL1OHNO2
IF `v GE 2` THEN GO _plot_($dim) C6H5CH2NO3
IF `v GE 2` THEN GO _plot_($dim) MNCATECH
IF `v GE 2` THEN GO _plot_($dim) NCRES1OOH
IF `v GE 2` THEN GO _plot_($dim) NPTLQOOH
IF `v GE 2` THEN GO _plot_($dim) TLEMUCPAN
IF `v GE 2` THEN GO _plot_($dim) C6CO2OHPAN
IF `v GE 2` THEN GO _plot_($dim) DNCRESO2
IF `v GE 2` THEN GO _plot_($dim) MNNCATECO2
IF `v GE 2` THEN GO _plot_($dim) NDNCRESOOH
IF `v GE 2` THEN GO _plot_($dim) NCRESO2
IF `v GE 2` THEN GO _plot_($dim) MNCATECO2
IF `v GE 2` THEN GO _plot_($dim) DNCRESOOH
IF `v GE 2` THEN GO _plot_($dim) MNNCATCOOH
IF `v GE 2` THEN GO _plot_($dim) TLBIPERNO3
IF `v GE 2` THEN GO _plot_($dim) TLEMUCNO3
IF `v GE 2` THEN GO _plot_($dim) NCRESOH
IF `v GE 2` THEN GO _plot_($dim) MNCATECOOH
! 8C (CHO)
IF `v GE 2` THEN GO _plot_($dim) C8BCO2
IF `v GE 2` THEN GO _plot_($dim) C721CO3
IF `v GE 2` THEN GO _plot_($dim) C8BCCO
IF `v GE 2` THEN GO _plot_($dim) C8BCOOH
IF `v GE 2` THEN GO _plot_($dim) C721CHO
IF `v GE 2` THEN GO _plot_($dim) NORPINIC
IF `v GE 2` THEN GO _plot_($dim) C721CO3H
IF `v GE 2` THEN GO _plot_($dim) C85O2
IF `v GE 2` THEN GO _plot_($dim) C89O2
IF `v GE 2` THEN GO _plot_($dim) C811O2
IF `v GE 2` THEN GO _plot_($dim) C86O2
IF `v GE 2` THEN GO _plot_($dim) C812O2
IF `v GE 2` THEN GO _plot_($dim) C813O2
IF `v GE 2` THEN GO _plot_($dim) C8BC
IF `v GE 2` THEN GO _plot_($dim) C85OOH
IF `v GE 2` THEN GO _plot_($dim) C811OOH
IF `v GE 2` THEN GO _plot_($dim) C86OOH
IF `v GE 2` THEN GO _plot_($dim) C812OOH
IF `v GE 2` THEN GO _plot_($dim) C813OOH
IF `v GE 2` THEN GO _plot_($dim) C89OOH
IF `v GE 2` THEN GO _plot_($dim) C810OOH
IF `v GE 2` THEN GO _plot_($dim) C810O2
! C8 (CHO) aromatics
IF `v GE 2` THEN GO _plot_($dim) STYRENE
IF `v GE 2` THEN GO _plot_($dim) STYRENO2
IF `v GE 2` THEN GO _plot_($dim) LXYL
IF `v GE 2` THEN GO _plot_($dim) EBENZ
IF `v GE 2` THEN GO _plot_($dim) STYRENOOH
! 8C (CHON)
IF `v GE 2` THEN GO _plot_($dim) C8BCNO3
IF `v GE 2` THEN GO _plot_($dim) C721PAN
IF `v GE 2` THEN GO _plot_($dim) C89NO3
IF `v GE 2` THEN GO _plot_($dim) C810NO3
! C8 (CHON) aromatics
IF `v GE 2` THEN GO _plot_($dim) NSTYRENO2
IF `v GE 2` THEN GO _plot_($dim) NSTYRENOOH
! 9C (CHO)
IF `v GE 2` THEN GO _plot_($dim) C85CO3
IF `v GE 2` THEN GO _plot_($dim) NOPINDCO
IF `v GE 2` THEN GO _plot_($dim) C85CO3H
IF `v GE 2` THEN GO _plot_($dim) NOPINDO2
IF `v GE 2` THEN GO _plot_($dim) C89CO3
IF `v GE 2` THEN GO _plot_($dim) C811CO3
IF `v GE 2` THEN GO _plot_($dim) NOPINONE
IF `v GE 2` THEN GO _plot_($dim) NOPINOO
IF `v GE 2` THEN GO _plot_($dim) NORPINAL
IF `v GE 2` THEN GO _plot_($dim) NORPINENOL
IF `v GE 2` THEN GO _plot_($dim) C89CO2H
IF `v GE 2` THEN GO _plot_($dim) NOPINDOOH
IF `v GE 2` THEN GO _plot_($dim) RO6R3P
IF `v GE 2` THEN GO _plot_($dim) C89CO3H
IF `v GE 2` THEN GO _plot_($dim) PINIC
IF `v GE 2` THEN GO _plot_($dim) C811CO3H
IF `v GE 2` THEN GO _plot_($dim) C96O2
IF `v GE 2` THEN GO _plot_($dim) C97O2
IF `v GE 2` THEN GO _plot_($dim) C98O2
IF `v GE 2` THEN GO _plot_($dim) C96OOH
IF `v GE 2` THEN GO _plot_($dim) C97OOH
IF `v GE 2` THEN GO _plot_($dim) C98OOH
! 9C (CHON)
IF `v GE 2` THEN GO _plot_($dim) C89PAN
IF `v GE 2` THEN GO _plot_($dim) C9PAN2
IF `v GE 2` THEN GO _plot_($dim) C811PAN
IF `v GE 2` THEN GO _plot_($dim) C96NO3
IF `v GE 2` THEN GO _plot_($dim) C98NO3
! C9 aromatics (lumped)
IF `v GE 2` THEN GO _plot_($dim) LTMB
! 10C (CHO)
IF `v GE 2` THEN GO _plot_($dim) C109CO
IF `v GE 2` THEN GO _plot_($dim) PINALO2
IF `v GE 2` THEN GO _plot_($dim) PINALOOH
IF `v GE 2` THEN GO _plot_($dim) C109O2
IF `v GE 2` THEN GO _plot_($dim) C96CO3
IF `v GE 2` THEN GO _plot_($dim) C106O2
IF `v GE 2` THEN GO _plot_($dim) APINENE
IF `v GE 2` THEN GO _plot_($dim) BPINENE
IF `v GE 2` THEN GO _plot_($dim) CARENE
IF `v GE 2` THEN GO _plot_($dim) SABINENE
IF `v GE 2` THEN GO _plot_($dim) CAMPHENE
IF `v GE 2` THEN GO _plot_($dim) PINAL
IF `v GE 2` THEN GO _plot_($dim) PINENOL
IF `v GE 2` THEN GO _plot_($dim) APINAOO
IF `v GE 2` THEN GO _plot_($dim) APINBOO
IF `v GE 2` THEN GO _plot_($dim) MENTHEN6ONE
IF `v GE 2` THEN GO _plot_($dim) PINONIC
IF `v GE 2` THEN GO _plot_($dim) C109OOH
IF `v GE 2` THEN GO _plot_($dim) PERPINONIC
IF `v GE 2` THEN GO _plot_($dim) C106OOH
IF `v GE 2` THEN GO _plot_($dim) BPINAO2
IF `v GE 2` THEN GO _plot_($dim) OH2MENTHEN6ONE
IF `v GE 2` THEN GO _plot_($dim) RO6R1O2
IF `v GE 2` THEN GO _plot_($dim) ROO6R1O2
IF `v GE 2` THEN GO _plot_($dim) RO6R3O2
IF `v GE 2` THEN GO _plot_($dim) OHMENTHEN6ONEO2
IF `v GE 2` THEN GO _plot_($dim) BPINAOOH
IF `v GE 2` THEN GO _plot_($dim) RO6R1OOH
IF `v GE 2` THEN GO _plot_($dim) RO6R3OOH
IF `v GE 2` THEN GO _plot_($dim) ROO6R1OOH
! 10C (CHON)
IF `v GE 2` THEN GO _plot_($dim) PINALNO3
IF `v GE 2` THEN GO _plot_($dim) C10PAN2
IF `v GE 2` THEN GO _plot_($dim) C106NO3
IF `v GE 2` THEN GO _plot_($dim) BPINANO3
IF `v GE 2` THEN GO _plot_($dim) RO6R1NO3
IF `v GE 2` THEN GO _plot_($dim) RO6R3NO3
IF `v GE 2` THEN GO _plot_($dim) ROO6R1NO3
! 10C (lumped)
IF `v GE 2` THEN GO _plot_($dim) LAPINABO2
IF `v GE 2` THEN GO _plot_($dim) LAPINABOOH
IF `v GE 2` THEN GO _plot_($dim) LNAPINABO2
IF `v GE 2` THEN GO _plot_($dim) LNBPINABO2
IF `v GE 2` THEN GO _plot_($dim) LAPINABNO3
IF `v GE 2` THEN GO _plot_($dim) LNAPINABOOH
IF `v GE 2` THEN GO _plot_($dim) LNBPINABOOH
! C10 aromatics (lumped)
IF `v GE 2` THEN GO _plot_($dim) LHAROM
! F
! Cl
IF `v GE 1` THEN GO _plot_($dim) Clx
IF `v GE 1` THEN GO _plot_($dim) Cl
IF `v GE 1` THEN GO _plot_($dim) Cl2
IF `v GE 1` THEN GO _plot_($dim) ClO
IF `v GE 1` THEN GO _plot_($dim) HCl
IF `v GE 1` THEN GO _plot_($dim) HOCl
IF `v GE 2` THEN GO _plot_($dim) Cl2O2
IF `v GE 2` THEN GO _plot_($dim) OClO
IF `v GE 2` THEN GO _plot_($dim) ClNO2
IF `v GE 1` THEN GO _plot_($dim) ClNO3
IF `v GE 2` THEN GO _plot_($dim) CCl4
IF `v GE 2` THEN GO _plot_($dim) CH3Cl
IF `v GE 2` THEN GO _plot_($dim) CH3CCl3
IF `v GE 2` THEN GO _plot_($dim) CF2Cl2
IF `v GE 2` THEN GO _plot_($dim) CFCl3
! Br
IF `v GE 1` THEN GO _plot_($dim) Brx
IF `v GE 1` THEN GO _plot_($dim) Br
IF `v GE 1` THEN GO _plot_($dim) Br2
IF `v GE 1` THEN GO _plot_($dim) BrO
IF `v GE 1` THEN GO _plot_($dim) HBr
IF `v GE 1` THEN GO _plot_($dim) HOBr
IF `v GE 2` THEN GO _plot_($dim) BrNO2
IF `v GE 1` THEN GO _plot_($dim) BrNO3
IF `v GE 1` THEN GO _plot_($dim) BrCl
IF `v GE 4` THEN GO _plot_($dim) CH3Br
IF `v GE 4` THEN GO _plot_($dim) CF3Br
IF `v GE 4` THEN GO _plot_($dim) CF2ClBr
IF `v GE 4` THEN GO _plot_($dim) CHCl2Br
IF `v GE 4` THEN GO _plot_($dim) CHClBr2
IF `v GE 4` THEN GO _plot_($dim) CH2ClBr
IF `v GE 4` THEN GO _plot_($dim) CH2Br2
IF `v GE 4` THEN GO _plot_($dim) CHBr3
! I
IF `v GE 1` THEN GO _plot_($dim) Ix
! let iod = 'I' ! must be renamed because i is also longitude
IF `v GE 1` THEN GO _plot_($dim) Iod
IF `v GE 1` THEN GO _plot_($dim) I2
IF `v GE 1` THEN GO _plot_($dim) IO
IF `v GE 1` THEN GO _plot_($dim) OIO
IF `v GE 1` THEN GO _plot_($dim) I2O2
IF `v GE 1` THEN GO _plot_($dim) HI
IF `v GE 1` THEN GO _plot_($dim) HOI
IF `v GE 1` THEN GO _plot_($dim) HIO3
IF `v GE 2` THEN GO _plot_($dim) INO2
IF `v GE 1` THEN GO _plot_($dim) INO3
IF `v GE 2` THEN GO _plot_($dim) CH3I
IF `v GE 2` THEN GO _plot_($dim) CH2I2
IF `v GE 2` THEN GO _plot_($dim) C3H7I
IF `v GE 1` THEN GO _plot_($dim) ICl
IF `v GE 2` THEN GO _plot_($dim) CH2ClI
IF `v GE 1` THEN GO _plot_($dim) IBr
IF `v GE 1` THEN GO _plot_($dim) IPART
! S

IF `v GE 4` THEN GO _plot_($dim) S
IF `v GE 4` THEN GO _plot_($dim) SO
IF `v GE 1` THEN GO _plot_($dim) SO2
IF `v GE 4` THEN GO _plot_($dim) SH
IF `v GE 1` THEN GO _plot_($dim) H2SO4
IF `v GE 2` THEN GO _plot_($dim) CH3SO3H
IF `v GE 1` THEN GO _plot_($dim) DMS
IF `v GE 1` THEN GO _plot_($dim) DMSO
IF `v GE 2` THEN GO _plot_($dim) CH3SO2
IF `v GE 2` THEN GO _plot_($dim) CH3SO3
IF `v GE 4` THEN GO _plot_($dim) OCS
IF `v GE 4` THEN GO _plot_($dim) SF6

! Hg
IF `v GE 1` THEN GO _plot_($dim) Hg
IF `v GE 1` THEN GO _plot_($dim) RGM
IF `v GE 1` THEN GO _plot_($dim) HgO
IF `v GE 1` THEN GO _plot_($dim) HgCl
IF `v GE 1` THEN GO _plot_($dim) HgCl2
IF `v GE 1` THEN GO _plot_($dim) HgBr
IF `v GE 1` THEN GO _plot_($dim) HgBr2
IF `v GE 1` THEN GO _plot_($dim) ClHgBr
IF `v GE 1` THEN GO _plot_($dim) BrHgOBr
IF `v GE 1` THEN GO _plot_($dim) ClHgOBr

GO exitviewport

EXIT
