# Supplementary material for: Oxidation of low-molecular weight organic compounds in clouddroplets: development of the JAMOC chemical mechanism inCAABA/MECCA (version 4.5.0gmdd)
Source: Copernicus journal article supplement (doi:10.5194/gmd-2020-337), 2020-10-29
Supplement: Supplementary file 20 [file gmd-2020-337-supplement.zip › caaba_4.5.0gmdd/manual/caaba_flowcontrol.odg]

## Slide: page1


 USE_JVAL


Start
of model run
End
of model run
traject_init
caaba_init

messy_init

mecca_init
sappho_init
semidep_physc

caaba_physc:
(calculations of
p, T, rh, sza, ...)
messy_physc
jval_physc
sappho_physc


jval_finish
caaba_finish

messy_finish

sappho_finish
mecca_finish
Start of time loop
t = t0
t = tend ?


Yes
No


end of time loop


jval_init
mecca_physc


traject_finish


traject_physc


 USE_TRAJECT


 USE_MECCA


 USE_TRAJECT


 USE_SEMIDEP


USE_JVAL


USE_SAPPHO


 USE_MECCA


USE_JVAL


USE_MECCA


USE_SAPPHO


USE_TRAJECT


BML
caaba.f90
BMIL
messy_main_control_cb.f90
SMIL
messy_*_box.f90
SMCL
messy_*.f90


 USE_SAPPHO

...
...
...
...
...
...
...
...
...


readj_init


 USE_READJ
