# Supplementary material for: Oxidation of low-molecular weight organic compounds in clouddroplets: development of the JAMOC chemical mechanism inCAABA/MECCA (version 4.5.0gmdd)
Source: Copernicus journal article supplement (doi:10.5194/gmd-2020-337), 2020-10-29
Supplement: Supplementary file 20 [file gmd-2020-337-supplement.zip › caaba_4.5.0gmdd/manual/caaba_mecca_manual.idx]

\indexentry{SZA|hyperindexformat{\see{solar zenith angle}}}{1}
\indexentry{$\alpha $|hyperindexformat{\see{accommodation coefficient}}}{1}
\indexentry{APN|hyperindexformat{\see{aerosol phase number}}}{1}
\indexentry{awk|hyperindexformat{\see{gawk}}}{1}
\indexentry{make|hyperindexformat{\see{gmake}}}{1}
\indexentry{ampersand|hyperindexformat{\see{{\tt  \&}}}}{1}
\indexentry{dollar sign|hyperindexformat{\see{{\tt  \$}}}}{1}
\indexentry{dry deposition|hyperindexformat{\see{deposition}}}{1}
\indexentry{ODE|hyperindexformat{\see{ordinary differential equation}}}{1}
\indexentry{EMAC|hyperindexformat{\see{ECHAM5/MESSy}}}{1}
\indexentry{curly braces|hyperindexformat{\see{$\{\}$}}}{1}
\indexentry{LWC|hyperindexformat{\see{liquid water content}}}{1}
\indexentry{angle brackets|hyperindexformat{\see{\textless \textgreater }}}{1}
\indexentry{MCM|hyperindexformat{\see{master chemical mechanism}}}{1}
\indexentry{nml|hyperindexformat{\see{namelist}}}{1}
\indexentry{K|hyperindexformat{\see{Kelvin}}}{1}
\indexentry{Pa|hyperindexformat{\see{Pascal}}}{1}
\indexentry{KPP|hyperindexformat{\see{Kinetic PreProcessor}}}{1}
\indexentry{rpl|hyperindexformat{\see{replacement file}}}{1}
\indexentry{spc|hyperindexformat{\see{species file}}}{1}
\indexentry{eqn|hyperindexformat{\see{equation file}}}{1}
\indexentry{JVPP|hyperindexformat{\see{JVAL PreProcessor}}}{1}
\indexentry{MECCA|hyperpage}{4}
\indexentry{chemistry|hyperpage}{4}
\indexentry{reaction mechanism|hyperpage}{4}
\indexentry{troposphere|hyperpage}{4}
\indexentry{stratosphere|hyperpage}{4}
\indexentry{aqueous phase|hyperpage}{4}
\indexentry{Kinetic PreProcessor|hyperpage}{4}
\indexentry{chemistry|hyperpage}{4}
\indexentry{base model|hyperpage}{4}
\indexentry{box model|hyperpage}{4}
\indexentry{CAABA|hyperpage}{4}
\indexentry{CAABA|hyperpage}{4}
\indexentry{MESSy|hyperpage}{4}
\indexentry{virtual machine|hyperpage}{4}
\indexentry{virtual machine|hyperpage}{4}
\indexentry{Linux|hyperpage}{4}
\indexentry{CAABA/MECCA|hyperpage}{4}
\indexentry{UNIX|hyperpage}{4}
\indexentry{Linux|hyperpage}{4}
\indexentry{MECCA|hyperpage}{5}
\indexentry{CAABA|hyperpage}{5}
\indexentry{box model|hyperpage}{5}
\indexentry{MAC|hyperpage}{5}
\indexentry{CAABA/MECCA|hyperpage}{5}
\indexentry{sed|hyperpage}{5}
\indexentry{GNU|hyperpage}{5}
\indexentry{sudo|hyperpage}{5}
\indexentry{xmecca|hyperpage}{5}
\indexentry{Windows|hyperpage}{5}
\indexentry{Windows|hyperpage}{5}
\indexentry{Linux|hyperpage}{5}
\indexentry{Windows|hyperpage}{5}
\indexentry{Fortran95|hyperpage}{5}
\indexentry{compiler|hyperpage}{5}
\indexentry{g95|hyperpage}{5}
\indexentry{Linux|hyperpage}{5}
\indexentry{Lahey|hyperpage}{5}
\indexentry{Fujitsu|hyperpage}{5}
\indexentry{Linux|hyperpage}{5}
\indexentry{Intel|hyperpage}{5}
\indexentry{Linux|hyperpage}{5}
\indexentry{Alpha (Compaq)|hyperpage}{5}
\indexentry{UNIX|hyperpage}{5}
\indexentry{Linux|hyperpage}{5}
\indexentry{Kinetic PreProcessor|hyperpage}{5}
\indexentry{reaction mechanism|hyperpage}{5}
\indexentry{ordinary differential equation|hyperpage}{5}
\indexentry{MECCA|hyperpage}{5}
\indexentry{Kinetic PreProcessor|hyperpage}{5}
\indexentry{python|hyperpage}{5}
\indexentry{matplotlib|hyperpage}{5}
\indexentry{tcsh|hyperpage}{5}
\indexentry{gawk|hyperpage}{5}
\indexentry{gmake|hyperpage}{5}
\indexentry{UNIX|hyperpage}{5}
\indexentry{Linux|hyperpage}{5}
\indexentry{bash|hyperpage}{5}
\indexentry{tcsh|hyperpage}{5}
\indexentry{reaction mechanism|hyperpage}{5}
\indexentry{netCDF|hyperpage}{5}
\indexentry{compiler|hyperpage}{5}
\indexentry{Fortran95|hyperpage}{5}
\indexentry{netCDF|hyperpage}{5}
\indexentry{CAABA|hyperpage}{6}
\indexentry{box model|hyperpage}{6}
\indexentry{ASCII|hyperpage}{6}
\indexentry{ferret|hyperpage}{6}
\indexentry{netCDF|hyperpage}{6}
\indexentry{FER\_GO|hyperpage}{6}
\indexentry{tcsh|hyperpage}{6}
\indexentry{graph-tool|hyperpage}{6}
\indexentry{graphviz|hyperpage}{6}
\indexentry{fpc|hyperpage}{6}
\indexentry{Pascal>programming language|hyperpage}{6}
\indexentry{compiler|hyperpage}{6}
\indexentry{tagging|hyperpage}{6}
\indexentry{isotope|hyperpage}{6}
\indexentry{CAABA/MECCA|hyperpage}{6}
\indexentry{unzip|hyperpage}{6}
\indexentry{Fortran95|hyperpage}{6}
\indexentry{compiler|hyperpage}{6}
\indexentry{F90FLAGS|hyperpage}{6}
\indexentry{C-preprocessor|hyperpage}{6}
\indexentry{CPP|hyperpage}{6}
\indexentry{netCDF|hyperpage}{6}
\indexentry{ASCII|hyperpage}{6}
\indexentry{netCDF|hyperpage}{6}
\indexentry{CAABA/MECCA|hyperpage}{6}
\indexentry{tcsh|hyperpage}{6}
\indexentry{xmecca|hyperpage}{6}
\indexentry{unzip|hyperpage}{7}
\indexentry{unzip|hyperpage}{7}
\indexentry{unzip|hyperpage}{7}
\indexentry{CAABA/MECCA|hyperpage}{7}
\indexentry{box model|hyperpage}{7}
\indexentry{python|hyperpage}{7}
\indexentry{xcaaba|hyperpage}{7}
\indexentry{base directory|hyperpage}{7}
\indexentry{python|hyperpage}{7}
\indexentry{xcaaba|hyperpage}{7}
\indexentry{xcaaba|hyperpage}{7}
\indexentry{reaction mechanism|hyperpage}{7}
\indexentry{xmecca|hyperpage}{7}
\indexentry{CAABA/MECCA|hyperpage}{7}
\indexentry{Fortran95|hyperpage}{7}
\indexentry{xcaaba|hyperpage}{7}
\indexentry{namelist|hyperpage}{7}
\indexentry{namelist|hyperpage}{7}
\indexentry{CAABA/MECCA|hyperpage}{7}
\indexentry{namelist|hyperpage}{7}
\indexentry{namelist|hyperpage}{7}
\indexentry{xcaaba|hyperpage}{7}
\indexentry{CAABA/MECCA|hyperpage}{7}
\indexentry{solar zenith angle|hyperpage}{7}
\indexentry{xcaaba|hyperpage}{7}
\indexentry{time|hyperpage}{7}
\indexentry{reaction mechanism|hyperpage}{7}
\indexentry{xmecca|hyperpage}{7}
\indexentry{MECCA|hyperpage}{7}
\indexentry{aqueous phase|hyperpage}{7}
\indexentry{CPU|hyperpage}{7}
\indexentry{xmecca|hyperpage}{7}
\indexentry{xmecca|hyperpage}{7}
\indexentry{xcaaba|hyperpage}{7}
\indexentry{xmecca|hyperpage}{7}
\indexentry{batch file|hyperpage}{8}
\indexentry{xmecca|hyperpage}{8}
\indexentry{reaction mechanism|hyperpage}{8}
\indexentry{gas phase|hyperpage}{8}
\indexentry{aqueous phase|hyperpage}{8}
\indexentry{chemistry|hyperpage}{8}
\indexentry{sea salt|hyperpage}{8}
\indexentry{particle|hyperpage}{8}
\indexentry{replacement file|hyperpage}{8}
\indexentry{boolean expression|hyperpage}{8}
\indexentry{reaction mechanism|hyperpage}{8}
\indexentry{batch file|hyperpage}{8}
\indexentry{EVAL|hyperpage}{8}
\indexentry{MECCA|hyperpage}{8}
\indexentry{chemistry|hyperpage}{8}
\indexentry{ECHAM5/MESSy|hyperpage}{8}
\indexentry{troposphere|hyperpage}{8}
\indexentry{chemistry|hyperpage}{8}
\indexentry{MBL|hyperpage}{8}
\indexentry{chemistry|hyperpage}{8}
\indexentry{aqueous phase|hyperpage}{8}
\indexentry{aerosol|hyperpage}{8}
\indexentry{label|hyperpage}{8}
\indexentry{enthalpy|hyperpage}{8}
\indexentry{tracer|hyperpage}{8}
\indexentry{reaction rate|hyperpage}{8}
\indexentry{tagging|hyperpage}{8}
\indexentry{isotope|hyperpage}{8}
\indexentry{Kinetic PreProcessor|hyperpage}{8}
\indexentry{positive definite|hyperpage}{8}
\indexentry{Rosenbrock solver|hyperpage}{8}
\indexentry{stiff sets of equations|hyperpage}{8}
\indexentry{reaction mechanism|hyperpage}{8}
\indexentry{aqueous phase|hyperpage}{8}
\indexentry{chemistry|hyperpage}{8}
\indexentry{Rosenbrock solver|hyperpage}{8}
\indexentry{Kinetic PreProcessor|hyperpage}{8}
\indexentry{Fortran95|hyperpage}{8}
\indexentry{Kinetic PreProcessor|hyperpage}{9}
\indexentry{Fortran95|hyperpage}{9}
\indexentry{LaTeX|hyperpage}{9}
\indexentry{reaction mechanism|hyperpage}{9}
\indexentry{graphviz|hyperpage}{9}
\indexentry{reaction mechanism|hyperpage}{9}
\indexentry{xmecca|hyperpage}{9}
\indexentry{Fortran95|hyperpage}{9}
\indexentry{reaction mechanism|hyperpage}{9}
\indexentry{Kinetic PreProcessor|hyperpage}{9}
\indexentry{Kinetic PreProcessor|hyperpage}{9}
\indexentry{MECCA|hyperpage}{9}
\indexentry{Kinetic PreProcessor|hyperpage}{9}
\indexentry{reaction mechanism|hyperpage}{9}
\indexentry{batch file|hyperpage}{9}
\indexentry{xcaaba|hyperpage}{9}
\indexentry{submodel|hyperpage}{10}
\indexentry{MECCA|hyperpage}{10}
\indexentry{chemistry|hyperpage}{10}
\indexentry{JVAL|hyperpage}{10}
\indexentry{JVAL|hyperpage}{10}
\indexentry{j-values|hyperpage}{10}
\indexentry{DISSOC|hyperpage}{10}
\indexentry{j-values|hyperpage}{10}
\indexentry{DISSOC|hyperpage}{10}
\indexentry{RADJIMT|hyperpage}{10}
\indexentry{RADJIMT|hyperpage}{10}
\indexentry{READJ|hyperpage}{10}
\indexentry{READJ|hyperpage}{10}
\indexentry{SAPPHO|hyperpage}{10}
\indexentry{SAPPHO|hyperpage}{10}
\indexentry{photolysis|hyperpage}{10}
\indexentry{SEMIDEP|hyperpage}{10}
\indexentry{SEMIDEP|hyperpage}{10}
\indexentry{emission|hyperpage}{10}
\indexentry{deposition|hyperpage}{10}
\indexentry{TRAJECT|hyperpage}{10}
\indexentry{TRAJECT|hyperpage}{10}
\indexentry{CAABA/MECCA|hyperpage}{10}
\indexentry{Scenario|hyperpage}{10}
\indexentry{CAABA|hyperpage}{10}
\indexentry{boundary conditions|hyperpage}{10}
\indexentry{scenario|hyperpage}{10}
\indexentry{photolysis|hyperpage}{10}
\indexentry{photo\_scenario|hyperpage}{10}
\indexentry{initialization|hyperpage}{10}
\indexentry{init\_scenario|hyperpage}{10}
\indexentry{photolysis|hyperpage}{10}
\indexentry{photo\_scenario|hyperpage}{10}
\indexentry{emission|hyperpage}{10}
\indexentry{emission\_scenario|hyperpage}{10}
\indexentry{deposition|hyperpage}{10}
\indexentry{drydep\_scenario|hyperpage}{10}
\indexentry{aqueous phase|hyperpage}{10}
\indexentry{aqueous\_scenario|hyperpage}{10}
\indexentry{list\_of\_scenarios|hyperpage}{10}
\indexentry{scenario|hyperpage}{10}
\indexentry{steady state|hyperpage}{10}
\indexentry{steady state|hyperpage}{10}
\indexentry{concentration|hyperpage}{10}
\indexentry{hydrocarbon|hyperpage}{10}
\indexentry{long-lived species|hyperpage}{10}
\indexentry{SETFIX|hyperpage}{10}
\indexentry{initialization|hyperpage}{10}
\indexentry{photolysis|hyperpage}{10}
\indexentry{xcaaba|hyperpage}{11}
\indexentry{CAABA|hyperpage}{12}
\indexentry{box model|hyperpage}{12}
\indexentry{multirun mode|hyperpage}{13}
\indexentry{netCDF|hyperpage}{13}
\indexentry{ASCII|hyperpage}{13}
\indexentry{txt2nc.py|hyperpage}{13}
\indexentry{multirun mode|hyperpage}{13}
\indexentry{xcaaba|hyperpage}{13}
\indexentry{multirun.py|hyperpage}{13}
\indexentry{namelist|hyperpage}{13}
\indexentry{CAABA/MECCA|hyperpage}{13}
\indexentry{netCDF|hyperpage}{13}
\indexentry{concentration|hyperpage}{13}
\indexentry{txt2nc.py|hyperpage}{13}
\indexentry{netCDF|hyperpage}{13}
\indexentry{MECCA|hyperpage}{13}
\indexentry{chemistry|hyperpage}{13}
\indexentry{pressure|hyperpage}{13}
\indexentry{Pascal>unit of pressure|hyperpage}{13}
\indexentry{temperature|hyperpage}{13}
\indexentry{Kelvin|hyperpage}{13}
\indexentry{UNIX|hyperpage}{13}
\indexentry{Monte-Carlo mode|hyperpage}{13}
\indexentry{CAABA/MECCA|hyperpage}{13}
\indexentry{reaction mechanism|hyperpage}{13}
\indexentry{xmecca|hyperpage}{13}
\indexentry{batch file|hyperpage}{13}
\indexentry{gawk|hyperpage}{13}
\indexentry{mcfct.awk|hyperpage}{13}
\indexentry{xcaaba|hyperpage}{13}
\indexentry{namelist|hyperpage}{13}
\indexentry{montecarlo.py|hyperpage}{13}
\indexentry{netCDF|hyperpage}{13}
\indexentry{concentration|hyperpage}{13}
\indexentry{caabaplot.py|hyperpage}{13}
\indexentry{steady state|hyperpage}{13}
\indexentry{concentration|hyperpage}{13}
\indexentry{linear regression|hyperpage}{13}
\indexentry{normal distribution|hyperpage}{14}
\indexentry{random number|hyperpage}{14}
\indexentry{JPL|hyperpage}{14}
\indexentry{IUPAC|hyperpage}{14}
\indexentry{equation file|hyperpage}{14}
\indexentry{$\mathsection $ (in {\tt  *.eqn} file)|hyperpage}{14}
\indexentry{$\{\}$ (in {\tt  *.eqn} file)|hyperpage}{14}
\indexentry{normal distribution|hyperpage}{14}
\indexentry{random number|hyperpage}{14}
\indexentry{Marsaglia polar method|hyperpage}{14}
\indexentry{Marsaglia polar method|hyperpage}{14}
\indexentry{random number|hyperpage}{14}
\indexentry{Fortran95|hyperpage}{14}
\indexentry{reaction mechanism|hyperpage}{14}
\indexentry{xmecca|hyperpage}{14}
\indexentry{Lagrangian|hyperpage}{14}
\indexentry{CAABA|hyperpage}{14}
\indexentry{Lagrangian|hyperpage}{14}
\indexentry{trajectory|hyperpage}{14}
\indexentry{box model|hyperpage}{14}
\indexentry{submodel|hyperpage}{14}
\indexentry{CAABA|hyperpage}{14}
\indexentry{submodel|hyperpage}{14}
\indexentry{TRAJECT|hyperpage}{14}
\indexentry{trajectory|hyperpage}{14}
\indexentry{MECCA|hyperpage}{14}
\indexentry{chemistry|hyperpage}{14}
\indexentry{JVAL|hyperpage}{14}
\indexentry{photolysis|hyperpage}{14}
\indexentry{trajectory|hyperpage}{15}
\indexentry{namelist|hyperpage}{15}
\indexentry{namelist|hyperpage}{15}
\indexentry{namelist|hyperpage}{15}
\indexentry{CAABA|hyperpage}{15}
\indexentry{xcaaba|hyperpage}{15}
\indexentry{trajectory|hyperpage}{15}
\indexentry{namelist|hyperpage}{15}
\indexentry{submodel|hyperpage}{15}
\indexentry{trajectory|hyperpage}{15}
\indexentry{CAABA|hyperpage}{15}
\indexentry{USE\_TRAJECT|hyperpage}{15}
\indexentry{USE\_MECCA|hyperpage}{15}
\indexentry{USE\_JVAL|hyperpage}{15}
\indexentry{USE\_SAPPHO|hyperpage}{15}
\indexentry{photolysis|hyperpage}{15}
\indexentry{photolysis|hyperpage}{15}
\indexentry{USE\_JVAL|hyperpage}{15}
\indexentry{photolysis|hyperpage}{15}
\indexentry{JVAL|hyperpage}{15}
\indexentry{submodel|hyperpage}{15}
\indexentry{SEMIDEP|hyperpage}{15}
\indexentry{scenario|hyperpage}{15}
\indexentry{trajectory|hyperpage}{15}
\indexentry{photolysis|hyperpage}{15}
\indexentry{mixing ratio|hyperpage}{15}
\indexentry{photolysis|hyperpage}{15}
\indexentry{photolysis|hyperpage}{15}
\indexentry{JVAL|hyperpage}{15}
\indexentry{photrat channel|hyperpage}{15}
\indexentry{photolysis|hyperpage}{15}
\indexentry{trajectory|hyperpage}{15}
\indexentry{netCDF|hyperpage}{15}
\indexentry{trajectory|hyperpage}{15}
\indexentry{waypoint|hyperpage}{15}
\indexentry{photolysis|hyperpage}{15}
\indexentry{photolysis|hyperpage}{15}
\indexentry{mixing ratio|hyperpage}{15}
\indexentry{netCDF|hyperpage}{15}
\indexentry{init\_spec|hyperpage}{15}
\indexentry{mixing ratio|hyperpage}{15}
\indexentry{box model|hyperpage}{15}
\indexentry{scenario|hyperpage}{15}
\indexentry{netCDF|hyperpage}{15}
\indexentry{scenario|hyperpage}{15}
\indexentry{trajectory|hyperpage}{15}
\indexentry{CAABA|hyperpage}{15}
\indexentry{trajectory|hyperpage}{15}
\indexentry{longitude|hyperpage}{16}
\indexentry{latitude|hyperpage}{16}
\indexentry{pressure|hyperpage}{16}
\indexentry{temperature|hyperpage}{16}
\indexentry{time|hyperpage}{16}
\indexentry{humidity|hyperpage}{16}
\indexentry{namelist|hyperpage}{16}
\indexentry{WMO|hyperpage}{16}
\indexentry{concentration|hyperpage}{16}
\indexentry{initialization|hyperpage}{16}
\indexentry{pressure|hyperpage}{16}
\indexentry{liquid|hyperpage}{16}
\indexentry{ice|hyperpage}{16}
\indexentry{saturation vapor pressure|hyperpage}{16}
\indexentry{ECHAM5/MESSy|hyperpage}{16}
\indexentry{namelist|hyperpage}{16}
\indexentry{time|hyperpage}{16}
\indexentry{namelist|hyperpage}{16}
\indexentry{CAABA|hyperpage}{16}
\indexentry{trajectory|hyperpage}{16}
\indexentry{trajectory|hyperpage}{16}
\indexentry{unit|hyperpage}{16}
\indexentry{time|hyperpage}{16}
\indexentry{trajectory|hyperpage}{16}
\indexentry{trajectory|hyperpage}{16}
\indexentry{trajectory|hyperpage}{16}
\indexentry{CAABA|hyperpage}{16}
\indexentry{netCDF|hyperpage}{16}
\indexentry{namelist|hyperpage}{16}
\indexentry{time|hyperpage}{16}
\indexentry{time|hyperpage}{16}
\indexentry{trajectory|hyperpage}{16}
\indexentry{waypoint|hyperpage}{16}
\indexentry{time|hyperpage}{16}
\indexentry{unit|hyperpage}{16}
\indexentry{longitude|hyperpage}{16}
\indexentry{degree|hyperpage}{16}
\indexentry{latitude|hyperpage}{16}
\indexentry{degree|hyperpage}{16}
\indexentry{pressure|hyperpage}{16}
\indexentry{Pascal>unit of pressure|hyperpage}{16}
\indexentry{temperature|hyperpage}{16}
\indexentry{Kelvin|hyperpage}{16}
\indexentry{humidity|hyperpage}{16}
\indexentry{CAABA|hyperpage}{16}
\indexentry{namelist|hyperpage}{16}
\indexentry{WMO|hyperpage}{16}
\indexentry{pressure|hyperpage}{16}
\indexentry{saturation vapor pressure|hyperpage}{16}
\indexentry{mass mixing ratio|hyperpage}{16}
\indexentry{mass mixing ratio|hyperpage}{16}
\indexentry{temperature|hyperpage}{16}
\indexentry{saturation vapor pressure|hyperpage}{16}
\indexentry{molar mass|hyperpage}{16}
\indexentry{namelist|hyperpage}{16}
\indexentry{photolysis|hyperpage}{16}
\indexentry{photolysis|hyperpage}{16}
\indexentry{netCDF|hyperpage}{16}
\indexentry{netCDF|hyperpage}{16}
\indexentry{trajectory|hyperpage}{16}
\indexentry{trajectory|hyperpage}{17}
\indexentry{unit|hyperpage}{17}
\indexentry{UTC|hyperpage}{17}
\indexentry{degree|hyperpage}{17}
\indexentry{longitude|hyperpage}{17}
\indexentry{degree|hyperpage}{17}
\indexentry{latitude|hyperpage}{17}
\indexentry{Pascal>unit of pressure|hyperpage}{17}
\indexentry{pressure|hyperpage}{17}
\indexentry{Kelvin|hyperpage}{17}
\indexentry{temperature|hyperpage}{17}
\indexentry{humidity|hyperpage}{17}
\indexentry{solar zenith angle|hyperpage}{17}
\indexentry{photolysis|hyperpage}{17}
\indexentry{time|hyperpage}{17}
\indexentry{trajectory|hyperpage}{17}
\indexentry{time|hyperpage}{17}
\indexentry{time|hyperpage}{17}
\indexentry{time|hyperpage}{17}
\indexentry{time|hyperpage}{17}
\indexentry{time|hyperpage}{17}
\indexentry{time|hyperpage}{17}
\indexentry{trajectory|hyperpage}{17}
\indexentry{trajectory|hyperpage}{17}
\indexentry{trajectory|hyperpage}{17}
\indexentry{tagging|hyperpage}{17}
\indexentry{isotope|hyperpage}{17}
\indexentry{fpc|hyperpage}{17}
\indexentry{Pascal>programming language|hyperpage}{17}
\indexentry{compiler|hyperpage}{17}
\indexentry{reaction mechanism|hyperpage}{17}
\indexentry{xmecca|hyperpage}{17}
\indexentry{batch file|hyperpage}{17}
\indexentry{CAABA/MECCA|hyperpage}{17}
\indexentry{CTRL|hyperpage}{17}
\indexentry{namelist|hyperpage}{17}
\indexentry{skeleton|hyperpage}{17}
\indexentry{mechanism reduction|hyperpage}{17}
\indexentry{python|hyperpage}{18}
\indexentry{extract\_sample points.py|hyperpage}{18}
\indexentry{multirun.py|hyperpage}{18}
\indexentry{python|hyperpage}{18}
\indexentry{xskeleton.py|hyperpage}{18}
\indexentry{python|hyperpage}{18}
\indexentry{netCDF|hyperpage}{19}
\indexentry{python|hyperpage}{19}
\indexentry{matplotlib|hyperpage}{19}
\indexentry{python|hyperpage}{19}
\indexentry{ferret|hyperpage}{19}
\indexentry{MECCA|hyperpage}{20}
\indexentry{gas phase|hyperpage}{20}
\indexentry{bromine|hyperpage}{20}
\indexentry{chemistry|hyperpage}{20}
\indexentry{graphviz|hyperpage}{20}
\indexentry{gas phase|hyperpage}{20}
\indexentry{aqueous phase|hyperpage}{20}
\indexentry{box model|hyperpage}{20}
\indexentry{aqueous phase|hyperpage}{20}
\indexentry{concentration|hyperpage}{20}
\indexentry{mixing ratio|hyperpage}{20}
\indexentry{aerosol|hyperpage}{20}
\indexentry{aerosol|hyperpage}{20}
\indexentry{particle|hyperpage}{20}
\indexentry{particle|hyperpage}{20}
\indexentry{photolysis|hyperpage}{20}
\indexentry{reaction rate|hyperpage}{20}
\indexentry{xmecca|hyperpage}{20}
\indexentry{reaction rate|hyperpage}{20}
\indexentry{setmodelrun.jnl|hyperpage}{20}
\indexentry{graphviz|hyperpage}{20}
\indexentry{gas phase|hyperpage}{20}
\indexentry{bromine|hyperpage}{20}
\indexentry{chemistry|hyperpage}{20}
\indexentry{graph-tool|hyperpage}{20}
\indexentry{python|hyperpage}{20}
\indexentry{CAABA/MECCA|hyperpage}{21}
\indexentry{CAABA/MECCA|hyperpage}{21}
\indexentry{namelist|hyperpage}{21}
\indexentry{species file|hyperpage}{21}
\indexentry{equation file|hyperpage}{21}
\indexentry{Fortran95|hyperpage}{21}
\indexentry{time|hyperpage}{21}
\indexentry{location|hyperpage}{21}
\indexentry{meteorology|hyperpage}{21}
\indexentry{mixing ratio|hyperpage}{21}
\indexentry{photolysis|hyperpage}{21}
\indexentry{emission|hyperpage}{21}
\indexentry{deposition|hyperpage}{21}
\indexentry{initialization|hyperpage}{21}
\indexentry{namelist|hyperpage}{21}
\indexentry{Fortran95|hyperpage}{21}
\indexentry{namelist|hyperpage}{21}
\indexentry{CAABA|hyperpage}{21}
\indexentry{namelist|hyperpage}{21}
\indexentry{namelist|hyperpage}{21}
\indexentry{namelist|hyperpage}{21}
\indexentry{multirun mode|hyperpage}{21}
\indexentry{multirun.py|hyperpage}{21}
\indexentry{namelist|hyperpage}{21}
\indexentry{CAABA|hyperpage}{21}
\indexentry{MESSy|hyperpage}{21}
\indexentry{submodel|hyperpage}{21}
\indexentry{USE\_MECCA|hyperpage}{21}
\indexentry{USE\_JVAL|hyperpage}{21}
\indexentry{USE\_SEMIDEP|hyperpage}{21}
\indexentry{photolysis|hyperpage}{21}
\indexentry{JVAL|hyperpage}{21}
\indexentry{MECCA|hyperpage}{21}
\indexentry{SAPPHO|hyperpage}{21}
\indexentry{DISSOC|hyperpage}{21}
\indexentry{submodel|hyperpage}{21}
\indexentry{USE\_SAPPHO|hyperpage}{21}
\indexentry{photrat channel|hyperpage}{21}
\indexentry{submodel|hyperpage}{21}
\indexentry{MECCA|hyperpage}{21}
\indexentry{chemistry|hyperpage}{21}
\indexentry{time|hyperpage}{21}
\indexentry{time|hyperpage}{21}
\indexentry{integer|hyperpage}{21}
\indexentry{floating point|hyperpage}{21}
\indexentry{unit|hyperpage}{21}
\indexentry{steady state|hyperpage}{21}
\indexentry{location|hyperpage}{22}
\indexentry{latitude|hyperpage}{22}
\indexentry{longitude|hyperpage}{22}
\indexentry{latitude|hyperpage}{22}
\indexentry{photolysis|hyperpage}{22}
\indexentry{solar zenith angle|hyperpage}{22}
\indexentry{longitude|hyperpage}{22}
\indexentry{TRAJECT|hyperpage}{22}
\indexentry{temperature|hyperpage}{22}
\indexentry{pressure|hyperpage}{22}
\indexentry{humidity|hyperpage}{22}
\indexentry{height|hyperpage}{22}
\indexentry{boundary layer|hyperpage}{22}
\indexentry{zmbl|hyperpage}{22}
\indexentry{Kelvin|hyperpage}{22}
\indexentry{Pascal|hyperpage}{22}
\indexentry{submodel|hyperpage}{22}
\indexentry{SEMIDEP|hyperpage}{22}
\indexentry{emission|hyperpage}{22}
\indexentry{zmbl|hyperpage}{22}
\indexentry{CAABA|hyperpage}{22}
\indexentry{box model|hyperpage}{22}
\indexentry{initialization|hyperpage}{22}
\indexentry{netCDF|hyperpage}{22}
\indexentry{init\_spec|hyperpage}{22}
\indexentry{submodel|hyperpage}{22}
\indexentry{READJ|hyperpage}{22}
\indexentry{netCDF|hyperpage}{22}
\indexentry{j-values|hyperpage}{22}
\indexentry{netCDF|hyperpage}{22}
\indexentry{time|hyperpage}{22}
\indexentry{init\_j|hyperpage}{22}
\indexentry{scenario|hyperpage}{22}
\indexentry{MBL|hyperpage}{22}
\indexentry{reaction rate|hyperpage}{22}
\indexentry{mixing ratio|hyperpage}{22}
\indexentry{concentration|hyperpage}{22}
\indexentry{chemistry|hyperpage}{22}
\indexentry{Kinetic PreProcessor|hyperpage}{22}
\indexentry{MECCA|hyperpage}{22}
\indexentry{namelist|hyperpage}{22}
\indexentry{namelist|hyperpage}{22}
\indexentry{CTRL\_KPP|hyperpage}{22}
\indexentry{CTRL|hyperpage}{22}
\indexentry{namelist|hyperpage}{22}
\indexentry{CPL|hyperpage}{22}
\indexentry{CAABA|hyperpage}{22}
\indexentry{CLOUDJ|hyperpage}{22}
\indexentry{namelist|hyperpage}{22}
\indexentry{namelist|hyperpage}{22}
\indexentry{CTRL|hyperpage}{22}
\indexentry{DISSOC|hyperpage}{22}
\indexentry{namelist|hyperpage}{22}
\indexentry{namelist|hyperpage}{22}
\indexentry{DISSOC|hyperpage}{22}
\indexentry{submodel|hyperpage}{22}
\indexentry{CAABA|hyperpage}{22}
\indexentry{namelist|hyperpage}{22}
\indexentry{CTRL|hyperpage}{22}
\indexentry{JVAL|hyperpage}{22}
\indexentry{namelist|hyperpage}{22}
\indexentry{namelist|hyperpage}{22}
\indexentry{JVAL|hyperpage}{22}
\indexentry{submodel|hyperpage}{22}
\indexentry{CAABA|hyperpage}{22}
\indexentry{namelist|hyperpage}{22}
\indexentry{CTRL|hyperpage}{22}
\indexentry{species file|hyperpage}{22}
\indexentry{Kinetic PreProcessor|hyperpage}{22}
\indexentry{gas phase|hyperpage}{22}
\indexentry{carbon|hyperpage}{22}
\indexentry{atoms|hyperpage}{22}
\indexentry{master chemical mechanism|hyperpage}{22}
\indexentry{lumped species|hyperpage}{22}
\indexentry{MECCA|hyperpage}{23}
\indexentry{aqueous species|hyperpage}{23}
\indexentry{cation|hyperpage}{23}
\indexentry{anion|hyperpage}{23}
\indexentry{anion|hyperpage}{23}
\indexentry{aqueous species|hyperpage}{23}
\indexentry{aqueous phase|hyperpage}{23}
\indexentry{aerosol|hyperpage}{23}
\indexentry{xmecca|hyperpage}{23}
\indexentry{accumulation|hyperpage}{23}
\indexentry{chemistry|hyperpage}{23}
\indexentry{aerosol|hyperpage}{23}
\indexentry{particle|hyperpage}{23}
\indexentry{DEFVAR|hyperpage}{23}
\indexentry{Kinetic PreProcessor|hyperpage}{23}
\indexentry{fixed species|hyperpage}{23}
\indexentry{SETFIX|hyperpage}{23}
\indexentry{equation file|hyperpage}{23}
\indexentry{reaction mechanism|hyperpage}{23}
\indexentry{Kinetic PreProcessor|hyperpage}{23}
\indexentry{Kinetic PreProcessor|hyperpage}{23}
\indexentry{xmecca|hyperpage}{23}
\indexentry{unit|hyperpage}{23}
\indexentry{unit|hyperpage}{23}
\indexentry{gas phase|hyperpage}{23}
\indexentry{first order|hyperpage}{23}
\indexentry{second order|hyperpage}{23}
\indexentry{third order|hyperpage}{23}
\indexentry{aqueous phase|hyperpage}{23}
\indexentry{unit|hyperpage}{23}
\indexentry{unit|hyperpage}{23}
\indexentry{aqueous phase|hyperpage}{23}
\indexentry{concentration|hyperpage}{23}
\indexentry{cvfac|hyperpage}{23}
\indexentry{aqueous phase|hyperpage}{23}
\indexentry{unit|hyperpage}{23}
\indexentry{liquid|hyperpage}{23}
\indexentry{unit|hyperpage}{23}
\indexentry{liquid water content|hyperpage}{23}
\indexentry{aerosol|hyperpage}{23}
\indexentry{unit|hyperpage}{23}
\indexentry{\textless \textgreater (in {\tt  *.eqn} file)|hyperpage}{23}
\indexentry{$\{\}$ (in {\tt  *.eqn} file)|hyperpage}{23}
\indexentry{{\tt  //} (in {\tt  *.eqn} file)|hyperpage}{23}
\indexentry{xmecca|hyperpage}{23}
\indexentry{{\tt  \%} (in {\tt  *.eqn} file)|hyperpage}{23}
\indexentry{marker|hyperpage}{23}
\indexentry{{\tt  \&} (in {\tt  *.eqn} file)|hyperpage}{23}
\indexentry{{\tt  @} (in {\tt  *.eqn} and {\tt  *.spc} file)|hyperpage}{23}
\indexentry{{\tt  \$} (in {\tt  *.eqn} file)|hyperpage}{23}
\indexentry{$\mathsection $ (in {\tt  *.eqn} file)|hyperpage}{23}
\indexentry{Fortran95|hyperpage}{23}
\indexentry{equation file|hyperpage}{23}
\indexentry{humidity|hyperpage}{23}
\indexentry{Kinetic PreProcessor|hyperpage}{23}
\indexentry{INLINE|hyperpage}{23}
\indexentry{F90\_GLOBAL|hyperpage}{23}
\indexentry{F90\_RCONST|hyperpage}{23}
\indexentry{reaction rate|hyperpage}{23}
\indexentry{Fortran95|hyperpage}{23}
\indexentry{equation file|hyperpage}{23}
\indexentry{F90\_RATES|hyperpage}{23}
\indexentry{equation tag|hyperpage}{23}
\indexentry{\textless \textgreater (in {\tt  *.eqn} file)|hyperpage}{23}
\indexentry{gas phase|hyperpage}{24}
\indexentry{j-values|hyperpage}{24}
\indexentry{photolysis|hyperpage}{24}
\indexentry{heterogeneous|hyperpage}{24}
\indexentry{stratosphere|hyperpage}{24}
\indexentry{clouds|hyperpage}{24}
\indexentry{aqueous phase|hyperpage}{24}
\indexentry{Henry's law|hyperpage}{24}
\indexentry{evaporation|hyperpage}{24}
\indexentry{aqueous phase|hyperpage}{24}
\indexentry{j-values|hyperpage}{24}
\indexentry{photolysis|hyperpage}{24}
\indexentry{oxygen|hyperpage}{24}
\indexentry{hydrogen|hyperpage}{24}
\indexentry{nitrogen|hyperpage}{24}
\indexentry{carbon|hyperpage}{24}
\indexentry{fluorine|hyperpage}{24}
\indexentry{chlorine|hyperpage}{24}
\indexentry{bromine|hyperpage}{24}
\indexentry{iodine|hyperpage}{24}
\indexentry{sulfur|hyperpage}{24}
\indexentry{mercury|hyperpage}{24}
\indexentry{iron|hyperpage}{24}
\indexentry{atoms|hyperpage}{24}
\indexentry{organic|hyperpage}{24}
\indexentry{aqueous phase|hyperpage}{24}
\indexentry{aerosol|hyperpage}{24}
\indexentry{marker|hyperpage}{24}
\indexentry{label|hyperpage}{24}
\indexentry{marker|hyperpage}{24}
\indexentry{marker|hyperpage}{24}
\indexentry{label|hyperpage}{24}
\indexentry{{\tt  \%} (in {\tt  *.eqn} file)|hyperpage}{24}
\indexentry{label|hyperpage}{24}
\indexentry{label|hyperpage}{24}
\indexentry{marker|hyperpage}{24}
\indexentry{label|hyperpage}{24}
\indexentry{altitude|hyperpage}{24}
\indexentry{stratosphere|hyperpage}{24}
\indexentry{troposphere|hyperpage}{24}
\indexentry{atmosphere|hyperpage}{24}
\indexentry{aerosol|hyperpage}{24}
\indexentry{aerosol|hyperpage}{24}
\indexentry{box model|hyperpage}{24}
\indexentry{heterogeneous|hyperpage}{24}
\indexentry{stratosphere|hyperpage}{24}
\indexentry{clouds|hyperpage}{24}
\indexentry{photolysis|hyperpage}{24}
\indexentry{reaction mechanism|hyperpage}{24}
\indexentry{MBL|hyperpage}{24}
\indexentry{chemistry|hyperpage}{24}
\indexentry{nitrogen|hyperpage}{25}
\indexentry{carbon|hyperpage}{25}
\indexentry{atom|hyperpage}{25}
\indexentry{fluorine|hyperpage}{25}
\indexentry{chlorine|hyperpage}{25}
\indexentry{bromine|hyperpage}{25}
\indexentry{iodine|hyperpage}{25}
\indexentry{sulfur|hyperpage}{25}
\indexentry{mercury|hyperpage}{25}
\indexentry{label|hyperpage}{25}
\indexentry{xmecca|hyperpage}{25}
\indexentry{label|hyperpage}{25}
\indexentry{xmecca|hyperpage}{25}
\indexentry{reaction mechanism|hyperpage}{25}
\indexentry{label|hyperpage}{25}
\indexentry{boolean expression|hyperpage}{25}
\indexentry{marker|hyperpage}{25}
\indexentry{{\tt  \%} (in {\tt  *.eqn} file)|hyperpage}{25}
\indexentry{label|hyperpage}{25}
\indexentry{gas phase|hyperpage}{25}
\indexentry{halogen|hyperpage}{25}
\indexentry{gawk|hyperpage}{25}
\indexentry{{\tt  \&\&} (boolean operator)|hyperpage}{25}
\indexentry{{\tt  \textbar \textbar } (boolean operator)|hyperpage}{25}
\indexentry{{\tt  !!} (boolean operator)|hyperpage}{25}
\indexentry{chlorine|hyperpage}{25}
\indexentry{bromine|hyperpage}{25}
\indexentry{heterogeneous|hyperpage}{25}
\indexentry{label|hyperpage}{25}
\indexentry{gas phase|hyperpage}{25}
\indexentry{label|hyperpage}{25}
\indexentry{label|hyperpage}{25}
\indexentry{reaction mechanism|hyperpage}{25}
\indexentry{gawk|hyperpage}{25}
\indexentry{spc2tex.awk|hyperpage}{25}
\indexentry{eqn2tex.awk|hyperpage}{25}
\indexentry{{\tt  //} (in {\tt  *.eqn} file)|hyperpage}{25}
\indexentry{{\tt  \&} (in {\tt  *.eqn} file)|hyperpage}{25}
\indexentry{{\tt  @} (in {\tt  *.eqn} and {\tt  *.spc} file)|hyperpage}{25}
\indexentry{{\tt  \$} (in {\tt  *.eqn} file)|hyperpage}{25}
\indexentry{Fortran95|hyperpage}{25}
\indexentry{CAABA/MECCA|hyperpage}{25}
\indexentry{Fortran95|hyperpage}{25}
\indexentry{CAABA|hyperpage}{25}
\indexentry{submodel|hyperpage}{25}
\indexentry{aqueous phase|hyperpage}{25}
\indexentry{molar mass|hyperpage}{25}
\indexentry{Henry's law|hyperpage}{25}
\indexentry{accommodation coefficient|hyperpage}{25}
\indexentry{CLOUDJ|hyperpage}{25}
\indexentry{CAABA|hyperpage}{25}
\indexentry{CLOUDJ|hyperpage}{25}
\indexentry{j-values|hyperpage}{25}
\indexentry{DISSOC|hyperpage}{25}
\indexentry{CAABA|hyperpage}{25}
\indexentry{files|hyperpage}{26}
\indexentry{CAABA/MECCA|hyperpage}{26}
\indexentry{Fortran95|hyperpage}{26}
\indexentry{CAABA|hyperpage}{26}
\indexentry{box model|hyperpage}{26}
\indexentry{netCDF|hyperpage}{26}
\indexentry{ASCII|hyperpage}{26}
\indexentry{CLOUDJ|hyperpage}{26}
\indexentry{CAABA|hyperpage}{26}
\indexentry{DISSOC|hyperpage}{26}
\indexentry{CAABA|hyperpage}{26}
\indexentry{JVAL|hyperpage}{26}
\indexentry{CAABA|hyperpage}{26}
\indexentry{MECCA|hyperpage}{26}
\indexentry{CAABA|hyperpage}{26}
\indexentry{tagging|hyperpage}{26}
\indexentry{isotope|hyperpage}{26}
\indexentry{READJ|hyperpage}{26}
\indexentry{CAABA|hyperpage}{26}
\indexentry{SAPPHO|hyperpage}{26}
\indexentry{CAABA|hyperpage}{26}
\indexentry{emission|hyperpage}{26}
\indexentry{deposition|hyperpage}{26}
\indexentry{SEMIDEP|hyperpage}{26}
\indexentry{CAABA|hyperpage}{26}
\indexentry{trajectory|hyperpage}{26}
\indexentry{photolysis|hyperpage}{26}
\indexentry{random number|hyperpage}{26}
\indexentry{CAABA|hyperpage}{26}
\indexentry{Mersenne-Twister|hyperpage}{26}
\indexentry{random number|hyperpage}{26}
\indexentry{CAABA|hyperpage}{26}
\indexentry{submodel|hyperpage}{26}
\indexentry{j-values|hyperpage}{26}
\indexentry{j-values|hyperpage}{26}
\indexentry{j-values|hyperpage}{26}
\indexentry{JVAL|hyperpage}{26}
\indexentry{photolysis|hyperpage}{26}
\indexentry{MECCA|hyperpage}{26}
\indexentry{MECCA|hyperpage}{26}
\indexentry{aerosol|hyperpage}{26}
\indexentry{chemistry|hyperpage}{26}
\indexentry{CAABA|hyperpage}{26}
\indexentry{Kinetic PreProcessor|hyperpage}{26}
\indexentry{xmecca|hyperpage}{26}
\indexentry{Kinetic PreProcessor|hyperpage}{26}
\indexentry{ordinary differential equation|hyperpage}{26}
\indexentry{initialization|hyperpage}{26}
\indexentry{ordinary differential equation|hyperpage}{26}
\indexentry{Jacobian|hyperpage}{26}
\indexentry{sparsity|hyperpage}{26}
\indexentry{dissoc|hyperpage}{27}
\indexentry{j-values|hyperpage}{27}
\indexentry{JVAL|hyperpage}{27}
\indexentry{CAABA|hyperpage}{27}
\indexentry{JVAL|hyperpage}{27}
\indexentry{j-values|hyperpage}{27}
\indexentry{JVPP|hyperpage}{27}
\indexentry{MECCA|hyperpage}{27}
\indexentry{CAABA|hyperpage}{27}
\indexentry{sea water|hyperpage}{27}
\indexentry{aerosol|hyperpage}{27}
\indexentry{radius|hyperpage}{27}
\indexentry{liquid water content|hyperpage}{27}
\indexentry{cvfac|hyperpage}{27}
\indexentry{mixing ratio|hyperpage}{27}
\indexentry{scenario|hyperpage}{27}
\indexentry{CAABA|hyperpage}{27}
\indexentry{namelist|hyperpage}{27}
\indexentry{initialization|hyperpage}{27}
\indexentry{SAPPHO|hyperpage}{27}
\indexentry{CAABA|hyperpage}{27}
\indexentry{SAPPHO|hyperpage}{27}
\indexentry{photolysis|hyperpage}{27}
\indexentry{SEMIDEP|hyperpage}{27}
\indexentry{CAABA|hyperpage}{27}
\indexentry{emission|hyperpage}{27}
\indexentry{deposition|hyperpage}{27}
\indexentry{multiphase|hyperpage}{27}
\indexentry{accommodation coefficient|hyperpage}{27}
\indexentry{mass transfer coefficient|hyperpage}{27}
\indexentry{Henry's law|hyperpage}{27}
\indexentry{aqueous phase|hyperpage}{27}
\indexentry{heterogeneous|hyperpage}{27}
\indexentry{aqueous phase|hyperpage}{27}
\indexentry{chemistry|hyperpage}{27}
\indexentry{Makefile|hyperpage}{27}
\indexentry{gmake|hyperpage}{27}
\indexentry{reaction mechanism|hyperpage}{27}
\indexentry{replacement file|hyperpage}{27}
\indexentry{gas phase|hyperpage}{28}
\indexentry{{\tt  @} (in {\tt  *.eqn} and {\tt  *.spc} file)|hyperpage}{28}
\indexentry{$\{\}$ (in {\tt  *.eqn} file)|hyperpage}{28}
\indexentry{\textless \textgreater (in {\tt  *.spc} file)|hyperpage}{28}
\indexentry{bromine|hyperpage}{28}
\indexentry{aqueous phase|hyperpage}{28}
\indexentry{{\tt  @} (in {\tt  *.eqn} and {\tt  *.spc} file)|hyperpage}{28}
\indexentry{$\{\}$ (in {\tt  *.eqn} file)|hyperpage}{28}
\indexentry{\textless \textgreater (in {\tt  *.eqn} file)|hyperpage}{28}
\indexentry{gas phase|hyperpage}{28}
\indexentry{equation file|hyperpage}{28}
\indexentry{$\mathsection $ (in {\tt  *.eqn} file)|hyperpage}{28}
\indexentry{gas phase|hyperpage}{28}
\indexentry{photolysis|hyperpage}{28}
\indexentry{photolysis|hyperpage}{28}
\indexentry{CLOUDJ|hyperpage}{28}
\indexentry{DISSOC|hyperpage}{28}
\indexentry{SAPPHO|hyperpage}{28}
\indexentry{READJ|hyperpage}{28}
\indexentry{JVAL|hyperpage}{28}
\indexentry{photolysis|hyperpage}{28}
\indexentry{aqueous phase|hyperpage}{28}
\indexentry{equation file|hyperpage}{28}
\indexentry{$\mathsection $ (in {\tt  *.eqn} file)|hyperpage}{28}
\indexentry{Henry's law|hyperpage}{28}
\indexentry{equation file|hyperpage}{28}
\indexentry{$\mathsection $ (in {\tt  *.eqn} file)|hyperpage}{28}
\indexentry{molar mass|hyperpage}{28}
\indexentry{Henry's law|hyperpage}{29}
\indexentry{accommodation coefficient|hyperpage}{29}
\indexentry{equation file|hyperpage}{29}
\indexentry{acid-base|hyperpage}{29}
\indexentry{equation file|hyperpage}{29}
\indexentry{$\mathsection $ (in {\tt  *.eqn} file)|hyperpage}{29}
\indexentry{label|hyperpage}{29}
\indexentry{label|hyperpage}{29}
\indexentry{sulfur|hyperpage}{29}
\indexentry{stratosphere|hyperpage}{29}
\indexentry{label|hyperpage}{29}
\indexentry{label|hyperpage}{29}
\indexentry{label|hyperpage}{29}
\indexentry{xmecca|hyperpage}{29}
\indexentry{label|hyperpage}{29}
\indexentry{label|hyperpage}{29}
\indexentry{emission|hyperpage}{29}
\indexentry{deposition|hyperpage}{29}
\indexentry{Kinetic PreProcessor|hyperpage}{29}
\indexentry{reaction mechanism|hyperpage}{29}
\indexentry{Kinetic PreProcessor|hyperpage}{29}
\indexentry{Fortran95|hyperpage}{29}
\indexentry{Kinetic PreProcessor|hyperpage}{29}
\indexentry{Kinetic PreProcessor|hyperpage}{29}
\indexentry{compiler|hyperpage}{29}
\indexentry{F90\_GLOBAL|hyperpage}{29}
\indexentry{INLINE|hyperpage}{29}
\indexentry{Fortran95|hyperpage}{29}
\indexentry{equation file|hyperpage}{29}
\indexentry{gmake|hyperpage}{29}
\indexentry{scenario|hyperpage}{29}
\indexentry{initialization|hyperpage}{29}
\indexentry{init\_scenario|hyperpage}{29}
\indexentry{photolysis|hyperpage}{29}
\indexentry{photo\_scenario|hyperpage}{29}
\indexentry{emission|hyperpage}{29}
\indexentry{emission\_scenario|hyperpage}{29}
\indexentry{deposition|hyperpage}{29}
\indexentry{drydep\_scenario|hyperpage}{29}
\indexentry{aqueous phase|hyperpage}{29}
\indexentry{aqueous\_scenario|hyperpage}{29}
\indexentry{scenario|hyperpage}{29}
\indexentry{scenario|hyperpage}{29}
\indexentry{scenario|hyperpage}{30}
\indexentry{list\_of\_scenarios|hyperpage}{30}
\indexentry{aerosol|hyperpage}{30}
\indexentry{aerosol|hyperpage}{30}
\indexentry{aerosol phase number|hyperpage}{30}
\indexentry{aerosol|hyperpage}{30}
\indexentry{accumulation|hyperpage}{30}
\indexentry{sea salt|hyperpage}{30}
\indexentry{aerosol|hyperpage}{30}
\indexentry{unit|hyperpage}{30}
\indexentry{radius|hyperpage}{30}
\indexentry{concentration|hyperpage}{30}
\indexentry{aerosol|hyperpage}{30}
\indexentry{aerosol|hyperpage}{30}
\indexentry{aerosol phase number|hyperpage}{30}
\indexentry{aerosol|hyperpage}{30}
\indexentry{aerosol phase number|hyperpage}{30}
\indexentry{sea water|hyperpage}{30}
\indexentry{ocean surface|hyperpage}{30}
\indexentry{aerosol|hyperpage}{30}
\indexentry{particle|hyperpage}{30}
\indexentry{netCDF|hyperpage}{30}
\indexentry{photolysis|hyperpage}{30}
\indexentry{time|hyperpage}{30}
\indexentry{photolysis|hyperpage}{30}
\indexentry{netCDF|hyperpage}{30}
\indexentry{initialization|hyperpage}{30}
\indexentry{MECCA|hyperpage}{30}
\indexentry{scenario|hyperpage}{30}
\indexentry{init\_scenario|hyperpage}{30}
\indexentry{init\_spec|hyperpage}{30}
\indexentry{netCDF|hyperpage}{30}
\indexentry{mixing ratio|hyperpage}{30}
\indexentry{scenario|hyperpage}{30}
\indexentry{scenario|hyperpage}{30}
\indexentry{photolysis|hyperpage}{30}
\indexentry{initialization|hyperpage}{30}
\indexentry{submodel|hyperpage}{30}
\indexentry{READJ|hyperpage}{30}
\indexentry{j-values|hyperpage}{30}
\indexentry{netCDF|hyperpage}{30}
\indexentry{READJ|hyperpage}{30}
\indexentry{steady state|hyperpage}{30}
\indexentry{netCDF|hyperpage}{30}
\indexentry{photolysis|hyperpage}{30}
\indexentry{submodel|hyperpage}{30}
\indexentry{DISSOC|hyperpage}{30}
\indexentry{MESSy|hyperpage}{30}
\indexentry{submodel|hyperpage}{30}
\indexentry{MESSy|hyperpage}{30}
\indexentry{submodel|hyperpage}{30}
\indexentry{MESSy|hyperpage}{30}
\indexentry{alphanumerical|hyperpage}{30}
\indexentry{USE\_XYZ|hyperpage}{30}
\indexentry{CAABA|hyperpage}{30}
\indexentry{MECCA|hyperpage}{31}
\indexentry{CAABA|hyperpage}{31}
\indexentry{box model|hyperpage}{31}
\indexentry{BML|hyperpage}{31}
\indexentry{BMIL|hyperpage}{31}
\indexentry{SMIL|hyperpage}{31}
\indexentry{Fortran95|hyperpage}{31}
\indexentry{Kinetic PreProcessor|hyperpage}{31}
\indexentry{CAABA|hyperpage}{31}
\indexentry{submodel|hyperpage}{31}
\indexentry{initialization|hyperpage}{31}
\indexentry{submodel|hyperpage}{31}
\indexentry{time|hyperpage}{31}
\indexentry{submodel|hyperpage}{31}
\indexentry{netCDF|hyperpage}{31}
\indexentry{submodel|hyperpage}{31}
\indexentry{USE\_XYZ|hyperpage}{31}
\indexentry{USE\_XYZ|hyperpage}{31}
\indexentry{namelist|hyperpage}{31}
\indexentry{MESSy|hyperpage}{31}
\indexentry{submodel|hyperpage}{31}
\indexentry{submodel|hyperpage}{31}
\indexentry{submodel|hyperpage}{31}
\indexentry{submodel|hyperpage}{31}
\indexentry{submodel|hyperpage}{32}
\indexentry{CAABA/MECCA|hyperpage}{32}
\indexentry{Fortran95|hyperpage}{32}
\indexentry{compiler|hyperpage}{32}
\indexentry{tcsh|hyperpage}{32}
\indexentry{bash|hyperpage}{32}
\indexentry{ksh|hyperpage}{32}
\indexentry{JVAL|hyperpage}{32}
\indexentry{JVPP|hyperpage}{32}
\indexentry{JVAL|hyperpage}{32}
\indexentry{JVAL|hyperpage}{32}
\indexentry{JVPP|hyperpage}{32}
\indexentry{JVAL|hyperpage}{32}
\indexentry{JVAL|hyperpage}{32}
\indexentry{JVAL|hyperpage}{32}
\indexentry{JVPP|hyperpage}{32}
\indexentry{JVPP|hyperpage}{32}
\indexentry{JVPP|hyperpage}{32}
\indexentry{JVPP|hyperpage}{32}
\indexentry{JVAL|hyperpage}{33}
\indexentry{JVPP|hyperpage}{33}
\indexentry{JVAL|hyperpage}{33}
\indexentry{JVAL|hyperpage}{33}
\indexentry{JVAL|hyperpage}{33}
\indexentry{JVPP|hyperpage}{33}
\indexentry{JVPP|hyperpage}{34}
\indexentry{JVAL|hyperpage}{35}
\indexentry{JVPP|hyperpage}{35}
\indexentry{JVPP|hyperpage}{35}
\indexentry{JVPP|hyperpage}{35}
\indexentry{JVPP|hyperpage}{35}
\indexentry{JVPP|hyperpage}{36}
\indexentry{JVPP|hyperpage}{37}
\indexentry{JVPP|hyperpage}{37}
\indexentry{JVAL|hyperpage}{37}
\indexentry{JVAL|hyperpage}{38}
\indexentry{JVPP|hyperpage}{38}
\indexentry{JVPP|hyperpage}{38}
\indexentry{base model|hyperpage}{38}
\indexentry{submodel|hyperpage}{38}
\indexentry{SMCL|hyperpage}{38}
\indexentry{submodel|hyperpage}{38}
\indexentry{SMIL|hyperpage}{38}
\indexentry{PolyMECCA|hyperpage}{38}
\indexentry{CHEMGLUE|hyperpage}{38}
\indexentry{xpolymecca|hyperpage}{39}
