# Supplementary material for: Oxidation of low-molecular weight organic compounds in clouddroplets: development of the JAMOC chemical mechanism inCAABA/MECCA (version 4.5.0gmdd)
Source: Copernicus journal article supplement (doi:10.5194/gmd-2020-337), 2020-10-29
Supplement: Supplementary file 20 [file gmd-2020-337-supplement.zip › caaba_4.5.0gmdd/manual/caaba_mecca_manual.ilg]

This is makeindex, version 2.15 [TeX Live 2015] (kpathsea + Thai support).
Scanning style file ./myindex.ist.................done (17 attributes redefined, 0 ignored).
Scanning input file caaba_mecca_manual.idx.....done (1078 entries accepted, 0 rejected).
Sorting entries............done (12499 comparisons).
Generating output file caaba_mecca_manual.ind....done (436 lines written, 0 warnings).
Output written in caaba_mecca_manual.ind.
Transcript written in caaba_mecca_manual.ilg.
