# Supplementary material for: Oxidation of low-molecular weight organic compounds in clouddroplets: development of the JAMOC chemical mechanism inCAABA/MECCA (version 4.5.0gmdd)
Source: Copernicus journal article supplement (doi:10.5194/gmd-2020-337), 2020-10-29
Supplement: Supplementary file 20 [file gmd-2020-337-supplement.zip › caaba_4.5.0gmdd/manual/caaba_mecca_manual.ind]

\begin{theindex}
{\large\bf\hfill Symbols\hfill}\nopagebreak

  \item $\alpha $\pfill 
		\hyperindexformat{\see{accommodation coefficient}}{1}
  \item $\mathsection $ (in {\tt *.eqn} file)\pfill \hyperpage{14}, 
		\hyperpage{23}, \hyperpage{28, 29}
  \item $\{\}$ (in {\tt *.eqn} file)\pfill \hyperpage{14}, 
		\hyperpage{23}, \hyperpage{28}
  \item \textless \textgreater (in {\tt *.eqn} file)\pfill 
		\hyperpage{23}, \hyperpage{28}
  \item \textless \textgreater (in {\tt *.spc} file)\pfill 
		\hyperpage{28}
  \item {\tt !} (boolean operator)\pfill \hyperpage{25}
  \item {\tt //} (in {\tt *.eqn} file)\pfill \hyperpage{23}, 
		\hyperpage{25}
  \item {\tt @} (in {\tt *.eqn} and {\tt *.spc} file)\pfill 
		\hyperpage{23}, \hyperpage{25}, \hyperpage{28}
  \item {\tt \$} (in {\tt *.eqn} file)\pfill \hyperpage{23}, 
		\hyperpage{25}
  \item {\tt \%} (in {\tt *.eqn} file)\pfill \hyperpage{23--25}
  \item {\tt \&\&} (boolean operator)\pfill \hyperpage{25}
  \item {\tt \&} (in {\tt *.eqn} file)\pfill \hyperpage{23}, 
		\hyperpage{25}
  \item {\tt \textbar \textbar } (boolean operator)\pfill 
		\hyperpage{25}

  \indexspace
{\large\bf\hfill A\hfill}\nopagebreak

  \item accommodation coefficient\pfill \hyperpage{25}, \hyperpage{27}, 
		\hyperpage{29}
  \item accumulation\pfill \hyperpage{23}, \hyperpage{30}
  \item acid-base\pfill \hyperpage{29}
  \item aerosol\pfill \hyperpage{8}, \hyperpage{20}, \hyperpage{23, 24}, 
		\hyperpage{26, 27}, \hyperpage{30}
  \item aerosol phase number\pfill \hyperpage{30}
  \item Alpha (Compaq)\pfill \hyperpage{5}
  \item alphanumerical\pfill \hyperpage{30}
  \item altitude\pfill \hyperpage{24}
  \item ampersand\pfill \hyperindexformat{\see{{\tt \&}}}{1}
  \item angle brackets\pfill 
		\hyperindexformat{\see{\textless \textgreater }}{1}
  \item anion\pfill \hyperpage{23}
  \item APN\pfill \hyperindexformat{\see{aerosol phase number}}{1}
  \item aqueous phase\pfill \hyperpage{4}, \hyperpage{7, 8}, 
		\hyperpage{10}, \hyperpage{20}, \hyperpage{23--25}, 
		\hyperpage{27--29}
  \item aqueous species\pfill \hyperpage{23}
  \item aqueous\_scenario\pfill \hyperpage{10}, \hyperpage{29}
  \item ASCII\pfill \hyperpage{6}, \hyperpage{13}, \hyperpage{26}
  \item atmosphere\pfill \hyperpage{24}
  \item atom\pfill \hyperpage{25}
  \item atoms\pfill \hyperpage{22}, \hyperpage{24}
  \item awk\pfill \hyperindexformat{\see{gawk}}{1}

  \indexspace
{\large\bf\hfill B\hfill}\nopagebreak

  \item base directory\pfill \hyperpage{7}
  \item base model\pfill \hyperpage{4}, \hyperpage{38}
  \item bash\pfill \hyperpage{5}, \hyperpage{32}
  \item batch file\pfill \hyperpage{8, 9}, \hyperpage{13}, 
		\hyperpage{17}
  \item BMIL\pfill \hyperpage{31}
  \item BML\pfill \hyperpage{31}
  \item boolean expression\pfill \hyperpage{8}, \hyperpage{25}
  \item boundary conditions\pfill \hyperpage{10}
  \item boundary layer\pfill \hyperpage{22}
  \item box model\pfill \hyperpage{4--7}, \hyperpage{12}, 
		\hyperpage{14, 15}, \hyperpage{20}, \hyperpage{22}, 
		\hyperpage{24}, \hyperpage{26}, \hyperpage{31}
  \item bromine\pfill \hyperpage{20}, \hyperpage{24, 25}, 
		\hyperpage{28}

  \indexspace
{\large\bf\hfill C\hfill}\nopagebreak

  \item C-preprocessor\pfill \hyperpage{6}
  \item CAABA\pfill \hyperpage{4--6}, \hyperpage{10}, \hyperpage{12}, 
		\hyperpage{14--16}, \hyperpage{21, 22}, 
		\hyperpage{25--27}, \hyperpage{30, 31}
  \item CAABA/MECCA\pfill \hyperpage{4--7}, \hyperpage{10}, 
		\hyperpage{13}, \hyperpage{17}, \hyperpage{21}, 
		\hyperpage{25, 26}, \hyperpage{32}
  \item caabaplot.py\pfill \hyperpage{13}
  \item carbon\pfill \hyperpage{22}, \hyperpage{24, 25}
  \item cation\pfill \hyperpage{23}
  \item CHEMGLUE\pfill \hyperpage{38}
  \item chemistry\pfill \hyperpage{4}, \hyperpage{8}, \hyperpage{10}, 
		\hyperpage{13, 14}, \hyperpage{20--24}, 
		\hyperpage{26, 27}
  \item chlorine\pfill \hyperpage{24, 25}
  \item CLOUDJ\pfill \hyperpage{22}, \hyperpage{25, 26}, \hyperpage{28}
  \item clouds\pfill \hyperpage{24}
  \item compiler\pfill \hyperpage{5, 6}, \hyperpage{17}, \hyperpage{29}, 
		\hyperpage{32}
  \item concentration\pfill \hyperpage{10}, \hyperpage{13}, 
		\hyperpage{16}, \hyperpage{20}, \hyperpage{22, 23}, 
		\hyperpage{30}
  \item CPL\pfill \hyperpage{22}
  \item CPP\pfill \hyperpage{6}
  \item CPU\pfill \hyperpage{7}
  \item CTRL\pfill \hyperpage{17}, \hyperpage{22}
  \item CTRL\_KPP\pfill \hyperpage{22}
  \item curly braces\pfill \hyperindexformat{\see{$\{\}$}}{1}
  \item cvfac\pfill \hyperpage{23}, \hyperpage{27}

  \indexspace
{\large\bf\hfill D\hfill}\nopagebreak

  \item DEFVAR\pfill \hyperpage{23}
  \item degree\pfill \hyperpage{16, 17}
  \item deposition\pfill \hyperpage{10}, \hyperpage{21}, 
		\hyperpage{26, 27}, \hyperpage{29}
  \item DISSOC\pfill \hyperpage{10}, \hyperpage{21, 22}, 
		\hyperpage{25, 26}, \hyperpage{28}, \hyperpage{30}
  \item dissoc\pfill \hyperpage{27}
  \item dollar sign\pfill \hyperindexformat{\see{{\tt \$}}}{1}
  \item dry deposition\pfill \hyperindexformat{\see{deposition}}{1}
  \item drydep\_scenario\pfill \hyperpage{10}, \hyperpage{29}

  \indexspace
{\large\bf\hfill E\hfill}\nopagebreak

  \item ECHAM5/MESSy\pfill \hyperpage{8}, \hyperpage{16}
  \item EMAC\pfill \hyperindexformat{\see{ECHAM5/MESSy}}{1}
  \item emission\pfill \hyperpage{10}, \hyperpage{21, 22}, 
		\hyperpage{26, 27}, \hyperpage{29}
  \item emission\_scenario\pfill \hyperpage{10}, \hyperpage{29}
  \item enthalpy\pfill \hyperpage{8}
  \item eqn\pfill \hyperindexformat{\see{equation file}}{1}
  \item eqn2tex.awk\pfill \hyperpage{25}
  \item equation file\pfill \hyperpage{14}, \hyperpage{21}, 
		\hyperpage{23}, \hyperpage{28, 29}
  \item equation tag\pfill \hyperpage{23}
  \item EVAL\pfill \hyperpage{8}
  \item evaporation\pfill \hyperpage{24}
  \item extract\_sample points.py\pfill \hyperpage{18}

  \indexspace
{\large\bf\hfill F\hfill}\nopagebreak

  \item F90\_GLOBAL\pfill \hyperpage{23}, \hyperpage{29}
  \item F90\_RATES\pfill \hyperpage{23}
  \item F90\_RCONST\pfill \hyperpage{23}
  \item F90FLAGS\pfill \hyperpage{6}
  \item FER\_GO\pfill \hyperpage{6}
  \item ferret\pfill \hyperpage{6}, \hyperpage{19}
  \item files\pfill \hyperpage{26}
  \item first order\pfill \hyperpage{23}
  \item fixed species\pfill \hyperpage{23}
  \item floating point\pfill \hyperpage{21}
  \item fluorine\pfill \hyperpage{24, 25}
  \item Fortran95\pfill \hyperpage{5--9}, \hyperpage{14}, 
		\hyperpage{21}, \hyperpage{23}, \hyperpage{25, 26}, 
		\hyperpage{29}, \hyperpage{31, 32}
  \item fpc\pfill \hyperpage{6}, \hyperpage{17}
  \item Fujitsu\pfill \hyperpage{5}

  \indexspace
{\large\bf\hfill G\hfill}\nopagebreak

  \item g95\pfill \hyperpage{5}
  \item gas phase\pfill \hyperpage{8}, \hyperpage{20}, 
		\hyperpage{22--25}, \hyperpage{28}
  \item gawk\pfill \hyperpage{5}, \hyperpage{13}, \hyperpage{25}
  \item gmake\pfill \hyperpage{5}, \hyperpage{27}, \hyperpage{29}
  \item GNU\pfill \hyperpage{5}
  \item graph-tool\pfill \hyperpage{6}, \hyperpage{20}
  \item graphviz\pfill \hyperpage{6}, \hyperpage{9}, \hyperpage{20}

  \indexspace
{\large\bf\hfill H\hfill}\nopagebreak

  \item halogen\pfill \hyperpage{25}
  \item height\pfill \hyperpage{22}
  \item Henry's law\pfill \hyperpage{24, 25}, \hyperpage{27--29}
  \item heterogeneous\pfill \hyperpage{24, 25}, \hyperpage{27}
  \item humidity\pfill \hyperpage{16, 17}, \hyperpage{22, 23}
  \item hydrocarbon\pfill \hyperpage{10}
  \item hydrogen\pfill \hyperpage{24}

  \indexspace
{\large\bf\hfill I\hfill}\nopagebreak

  \item ice\pfill \hyperpage{16}
  \item init\_j\pfill \hyperpage{22}
  \item init\_scenario\pfill \hyperpage{10}, \hyperpage{29, 30}
  \item init\_spec\pfill \hyperpage{15}, \hyperpage{22}, \hyperpage{30}
  \item initialization\pfill \hyperpage{10}, \hyperpage{16}, 
		\hyperpage{21, 22}, \hyperpage{26, 27}, 
		\hyperpage{29--31}
  \item INLINE\pfill \hyperpage{23}, \hyperpage{29}
  \item integer\pfill \hyperpage{21}
  \item Intel\pfill \hyperpage{5}
  \item iodine\pfill \hyperpage{24, 25}
  \item iron\pfill \hyperpage{24}
  \item isotope\pfill \hyperpage{6}, \hyperpage{8}, \hyperpage{17}, 
		\hyperpage{26}
  \item IUPAC\pfill \hyperpage{14}

  \indexspace
{\large\bf\hfill J\hfill}\nopagebreak

  \item j-values\pfill \hyperpage{10}, \hyperpage{22}, 
		\hyperpage{24--27}, \hyperpage{30}
  \item Jacobian\pfill \hyperpage{26}
  \item JPL\pfill \hyperpage{14}
  \item JVAL\pfill \hyperpage{10}, \hyperpage{14, 15}, 
		\hyperpage{21, 22}, \hyperpage{26--28}, 
		\hyperpage{32, 33}, \hyperpage{35}, \hyperpage{37, 38}
  \item JVPP\pfill \hyperindexformat{\see{JVAL PreProcessor}}{1}, 
		\hyperpage{27}, \hyperpage{32--38}

  \indexspace
{\large\bf\hfill K\hfill}\nopagebreak

  \item K\pfill \hyperindexformat{\see{Kelvin}}{1}
  \item Kelvin\pfill \hyperpage{13}, \hyperpage{16, 17}, \hyperpage{22}
  \item Kinetic PreProcessor\pfill \hyperpage{4, 5}, \hyperpage{8, 9}, 
		\hyperpage{22, 23}, \hyperpage{26}, \hyperpage{29}, 
		\hyperpage{31}
  \item KPP\pfill \hyperindexformat{\see{Kinetic PreProcessor}}{1}
  \item ksh\pfill \hyperpage{32}

  \indexspace
{\large\bf\hfill L\hfill}\nopagebreak

  \item label\pfill \hyperpage{8}, \hyperpage{24, 25}, \hyperpage{29}
  \item Lagrangian\pfill \hyperpage{14}
  \item Lahey\pfill \hyperpage{5}
  \item LaTeX\pfill \hyperpage{9}
  \item latitude\pfill \hyperpage{16, 17}, \hyperpage{22}
  \item linear regression\pfill \hyperpage{13}
  \item Linux\pfill \hyperpage{4, 5}
  \item liquid\pfill \hyperpage{16}, \hyperpage{23}
  \item liquid water content\pfill \hyperpage{23}, \hyperpage{27}
  \item list\_of\_scenarios\pfill \hyperpage{10}, \hyperpage{30}
  \item location\pfill \hyperpage{21, 22}
  \item long-lived species\pfill \hyperpage{10}
  \item longitude\pfill \hyperpage{16, 17}, \hyperpage{22}
  \item lumped species\pfill \hyperpage{22}
  \item LWC\pfill \hyperindexformat{\see{liquid water content}}{1}

  \indexspace
{\large\bf\hfill M\hfill}\nopagebreak

  \item MAC\pfill \hyperpage{5}
  \item make\pfill \hyperindexformat{\see{gmake}}{1}
  \item Makefile\pfill \hyperpage{27}
  \item marker\pfill \hyperpage{23--25}
  \item Marsaglia polar method\pfill \hyperpage{14}
  \item mass mixing ratio\pfill \hyperpage{16}
  \item mass transfer coefficient\pfill \hyperpage{27}
  \item master chemical mechanism\pfill \hyperpage{22}
  \item matplotlib\pfill \hyperpage{5}, \hyperpage{19}
  \item MBL\pfill \hyperpage{8}, \hyperpage{22}, \hyperpage{24}
  \item mcfct.awk\pfill \hyperpage{13}
  \item MCM\pfill \hyperindexformat{\see{master chemical mechanism}}{1}
  \item MECCA\pfill \hyperpage{4, 5}, \hyperpage{7--10}, 
		\hyperpage{13, 14}, \hyperpage{20--23}, 
		\hyperpage{26, 27}, \hyperpage{30, 31}
  \item mechanism reduction\pfill \hyperpage{17}
  \item mercury\pfill \hyperpage{24, 25}
  \item Mersenne-Twister\pfill \hyperpage{26}
  \item MESSy\pfill \hyperpage{4}, \hyperpage{21}, \hyperpage{30, 31}
  \item meteorology\pfill \hyperpage{21}
  \item mixing ratio\pfill \hyperpage{15}, \hyperpage{20--22}, 
		\hyperpage{27}, \hyperpage{30}
  \item molar mass\pfill \hyperpage{16}, \hyperpage{25}, \hyperpage{28}
  \item Monte-Carlo mode\pfill \hyperpage{13}
  \item montecarlo.py\pfill \hyperpage{13}
  \item multiphase\pfill \hyperpage{27}
  \item multirun mode\pfill \hyperpage{13}, \hyperpage{21}
  \item multirun.py\pfill \hyperpage{13}, \hyperpage{18}, 
		\hyperpage{21}

  \indexspace
{\large\bf\hfill N\hfill}\nopagebreak

  \item namelist\pfill \hyperpage{7}, \hyperpage{13}, 
		\hyperpage{15--17}, \hyperpage{21, 22}, \hyperpage{27}, 
		\hyperpage{31}
  \item netCDF\pfill \hyperpage{5, 6}, \hyperpage{13}, 
		\hyperpage{15, 16}, \hyperpage{19}, \hyperpage{22}, 
		\hyperpage{26}, \hyperpage{30, 31}
  \item nitrogen\pfill \hyperpage{24, 25}
  \item nml\pfill \hyperindexformat{\see{namelist}}{1}
  \item normal distribution\pfill \hyperpage{14}

  \indexspace
{\large\bf\hfill O\hfill}\nopagebreak

  \item ocean surface\pfill \hyperpage{30}
  \item ODE\pfill 
		\hyperindexformat{\see{ordinary differential equation}}{1}
  \item ordinary differential equation\pfill \hyperpage{5}, 
		\hyperpage{26}
  \item organic\pfill \hyperpage{24}
  \item oxygen\pfill \hyperpage{24}

  \indexspace
{\large\bf\hfill P\hfill}\nopagebreak

  \item Pa\pfill \hyperindexformat{\see{Pascal}}{1}
  \item particle\pfill \hyperpage{8}, \hyperpage{20}, \hyperpage{23}, 
		\hyperpage{30}
  \item Pascal\pfill \hyperpage{22}
    \item ---, programming language\pfill \hyperpage{6}, \hyperpage{17}
    \item ---, unit of pressure\pfill \hyperpage{13}, 
		\hyperpage{16, 17}
  \item photo\_scenario\pfill \hyperpage{10}, \hyperpage{29}
  \item photolysis\pfill \hyperpage{10}, \hyperpage{14--17}, 
		\hyperpage{20--22}, \hyperpage{24}, \hyperpage{26--30}
  \item photrat channel\pfill \hyperpage{15}, \hyperpage{21}
  \item PolyMECCA\pfill \hyperpage{38}
  \item positive definite\pfill \hyperpage{8}
  \item pressure\pfill \hyperpage{13}, \hyperpage{16, 17}, 
		\hyperpage{22}
  \item python\pfill \hyperpage{5}, \hyperpage{7}, \hyperpage{18--20}

  \indexspace
{\large\bf\hfill R\hfill}\nopagebreak

  \item radius\pfill \hyperpage{27}, \hyperpage{30}
  \item RADJIMT\pfill \hyperpage{10}
  \item random number\pfill \hyperpage{14}, \hyperpage{26}
  \item reaction mechanism\pfill \hyperpage{4, 5}, \hyperpage{7--9}, 
		\hyperpage{13, 14}, \hyperpage{17}, \hyperpage{23--25}, 
		\hyperpage{27}, \hyperpage{29}
  \item reaction rate\pfill \hyperpage{8}, \hyperpage{20}, 
		\hyperpage{22, 23}
  \item READJ\pfill \hyperpage{10}, \hyperpage{22}, \hyperpage{26}, 
		\hyperpage{28}, \hyperpage{30}
  \item replacement file\pfill \hyperpage{8}, \hyperpage{27}
  \item Rosenbrock solver\pfill \hyperpage{8}
  \item rpl\pfill \hyperindexformat{\see{replacement file}}{1}

  \indexspace
{\large\bf\hfill S\hfill}\nopagebreak

  \item SAPPHO\pfill \hyperpage{10}, \hyperpage{21}, \hyperpage{26--28}
  \item saturation vapor pressure\pfill \hyperpage{16}
  \item Scenario\pfill \hyperpage{10}
  \item scenario\pfill \hyperpage{10}, \hyperpage{15}, \hyperpage{22}, 
		\hyperpage{27}, \hyperpage{29, 30}
  \item sea salt\pfill \hyperpage{8}, \hyperpage{30}
  \item sea water\pfill \hyperpage{27}, \hyperpage{30}
  \item second order\pfill \hyperpage{23}
  \item sed\pfill \hyperpage{5}
  \item SEMIDEP\pfill \hyperpage{10}, \hyperpage{15}, \hyperpage{22}, 
		\hyperpage{26, 27}
  \item SETFIX\pfill \hyperpage{10}, \hyperpage{23}
  \item setmodelrun.jnl\pfill \hyperpage{20}
  \item skeleton\pfill \hyperpage{17}
  \item SMCL\pfill \hyperpage{38}
  \item SMIL\pfill \hyperpage{31}, \hyperpage{38}
  \item solar zenith angle\pfill \hyperpage{7}, \hyperpage{17}, 
		\hyperpage{22}
  \item sparsity\pfill \hyperpage{26}
  \item spc\pfill \hyperindexformat{\see{species file}}{1}
  \item spc2tex.awk\pfill \hyperpage{25}
  \item species file\pfill \hyperpage{21, 22}
  \item steady state\pfill \hyperpage{10}, \hyperpage{13}, 
		\hyperpage{21}, \hyperpage{30}
  \item stiff sets of equations\pfill \hyperpage{8}
  \item stratosphere\pfill \hyperpage{4}, \hyperpage{24}, 
		\hyperpage{29}
  \item submodel\pfill \hyperpage{10}, \hyperpage{14, 15}, 
		\hyperpage{21, 22}, \hyperpage{25, 26}, 
		\hyperpage{30--32}, \hyperpage{38}
  \item sudo\pfill \hyperpage{5}
  \item sulfur\pfill \hyperpage{24, 25}, \hyperpage{29}
  \item SZA\pfill \hyperindexformat{\see{solar zenith angle}}{1}

  \indexspace
{\large\bf\hfill T\hfill}\nopagebreak

  \item tagging\pfill \hyperpage{6}, \hyperpage{8}, \hyperpage{17}, 
		\hyperpage{26}
  \item tcsh\pfill \hyperpage{5, 6}, \hyperpage{32}
  \item temperature\pfill \hyperpage{13}, \hyperpage{16, 17}, 
		\hyperpage{22}
  \item third order\pfill \hyperpage{23}
  \item time\pfill \hyperpage{7}, \hyperpage{16, 17}, 
		\hyperpage{21, 22}, \hyperpage{30, 31}
  \item tracer\pfill \hyperpage{8}
  \item TRAJECT\pfill \hyperpage{10}, \hyperpage{14}, \hyperpage{22}
  \item trajectory\pfill \hyperpage{14--17}, \hyperpage{26}
  \item troposphere\pfill \hyperpage{4}, \hyperpage{8}, \hyperpage{24}
  \item txt2nc.py\pfill \hyperpage{13}

  \indexspace
{\large\bf\hfill U\hfill}\nopagebreak

  \item unit\pfill \hyperpage{16, 17}, \hyperpage{21}, \hyperpage{23}, 
		\hyperpage{30}
  \item UNIX\pfill \hyperpage{4, 5}, \hyperpage{13}
  \item unzip\pfill \hyperpage{6, 7}
  \item USE\_JVAL\pfill \hyperpage{15}, \hyperpage{21}
  \item USE\_MECCA\pfill \hyperpage{15}, \hyperpage{21}
  \item USE\_SAPPHO\pfill \hyperpage{15}, \hyperpage{21}
  \item USE\_SEMIDEP\pfill \hyperpage{21}
  \item USE\_TRAJECT\pfill \hyperpage{15}
  \item USE\_XYZ\pfill \hyperpage{30, 31}
  \item UTC\pfill \hyperpage{17}

  \indexspace
{\large\bf\hfill V\hfill}\nopagebreak

  \item virtual machine\pfill \hyperpage{4}

  \indexspace
{\large\bf\hfill W\hfill}\nopagebreak

  \item waypoint\pfill \hyperpage{15, 16}
  \item Windows\pfill \hyperpage{5}
  \item WMO\pfill \hyperpage{16}

  \indexspace
{\large\bf\hfill X\hfill}\nopagebreak

  \item xcaaba\pfill \hyperpage{7}, \hyperpage{9}, \hyperpage{11}, 
		\hyperpage{13}, \hyperpage{15}
  \item xmecca\pfill \hyperpage{5--9}, \hyperpage{13, 14}, 
		\hyperpage{17}, \hyperpage{20}, \hyperpage{23}, 
		\hyperpage{25, 26}, \hyperpage{29}
  \item xpolymecca\pfill \hyperpage{39}
  \item xskeleton.py\pfill \hyperpage{18}

  \indexspace
{\large\bf\hfill Z\hfill}\nopagebreak

  \item zmbl\pfill \hyperpage{22}
 \end{theindex}
