# Supplementary material for: Oxidation of low-molecular weight organic compounds in clouddroplets: development of the JAMOC chemical mechanism inCAABA/MECCA (version 4.5.0gmdd)
Source: Copernicus journal article supplement (doi:10.5194/gmd-2020-337), 2020-10-29
Supplement: Supplementary file 20 [file gmd-2020-337-supplement.zip › caaba_4.5.0gmdd/manual/caaba_sketch.odg]

## Slide: page1

production and
sedimentation of
sea-salt aerosol
emission and
deposition
(SEMIDEP)
marine
boundary
layer (mbl)
ocean
r.h.= 76 %
p = 1013 hPa
T = 293 K
MECCA gas/aqueous
mass transfer
MECCA gas-
phase chemistry
ozone flux from free troposphere (SEMIDEP)


hν photolysis
(JVAL, SAPPHO
or READJ)
sulfate
particles
(MECCA aqueous-
phase chemistry)
sea-salt
particles
(MECCA aqueous-
phase chemistry)
