# Supplementary material for: Oxidation of low-molecular weight organic compounds in clouddroplets: development of the JAMOC chemical mechanism inCAABA/MECCA (version 4.5.0gmdd)
Source: Copernicus journal article supplement (doi:10.5194/gmd-2020-337), 2020-10-29
Supplement: Supplementary file 20 [file gmd-2020-337-supplement.zip › caaba_4.5.0gmdd/manual/caaba_use_diagr.odg]

## Slide: page1


messy_mecca_aero
messy_mecca
messy_mecca_kpp*


BML


messy_mecca_box

messy_main_constants_mem
messy_main_tools
caaba_mem
caaba (caaba_module)
messy_main_control_cb

caaba_io
caaba_io_*.inc


messy_traject_box
messy_sappho_box
messy_semidep_box
messy_sappho


messy_jval_box
messy_jval


messy_*_box
messy_*


BMIL
SMIL
SMCL
messy_main_blather
