# Supplementary material for: Oxidation of low-molecular weight organic compounds in clouddroplets: development of the JAMOC chemical mechanism inCAABA/MECCA (version 4.5.0gmdd)
Source: Copernicus journal article supplement (doi:10.5194/gmd-2020-337), 2020-10-29
Supplement: Supplementary file 20 [file gmd-2020-337-supplement.zip › caaba_4.5.0gmdd/manual/doxygen/xdoxygen]

#! /bin/tcsh -f
# Time-stamp: <2015-06-23 12:13:23 sander>
# xdoxygen

##############################################################################

echo
echo "Run doxygen? [y|n|q, default=y]"
set inputstring = "$<"
if ( "$inputstring" == "q" ) exit 1
if ( "$inputstring" != "n" ) then
  doxygen caaba_doxygen.cfg
  echo ; echo "q&d fix for doxygen cite bug:" ; echo
  cd latex
  foreach filename (*.tex)
    cp $filename $filename~
    sed 's|cite{qqq|cite{|g' $filename~ > $filename
    diff $filename~ $filename
  end
  cd -
endif

##############################################################################

echo
echo "Run pdflatex? [y|n|q, default=y]"
set inputstring = "$<"
if ( "$inputstring" == "q" ) exit 1
if ( "$inputstring" != "n" ) then
  cd latex
  pdflatex refman.tex
  bibtex refman.aux
  pdflatex refman.tex
  pdflatex refman.tex
  mv refman.pdf ../caaba_doxygen.pdf
  cd -
  evince caaba_doxygen.pdf >& /dev/null &
endif

##############################################################################

echo
echo "Complete cleanup? [y|n|q, default=n]"
set inputstring = "$<"
if ( "$inputstring" == "q" ) exit 1
if ( "$inputstring" == "y" ) then
  rm caaba_doxygen.log
  rm -fr latex html
endif

##############################################################################

exit

##############################################################################
