# Supplementary material for: Oxidation of low-molecular weight organic compounds in clouddroplets: development of the JAMOC chemical mechanism inCAABA/MECCA (version 4.5.0gmdd)
Source: Copernicus journal article supplement (doi:10.5194/gmd-2020-337), 2020-10-29
Supplement: Supplementary file 20 [file gmd-2020-337-supplement.zip › caaba_4.5.0gmdd/manual/flowcontrol_xcaaba.odg]

## Slide: page1

xcaaba

Fortran
compiler
(g95, lf95, ...)
execute
the model


xmecca
kpp

batch files
(*.bat)
selected chemistry mechanism
(mecca.spc, mecca.eqn)
kpp control file
(messy_mecca_kpp.kpp)
kpp-generated
Fortran files
(messy_mecca_kpp*.f90)
static, user-generated
Fortran files
(*.f90, *.inc)
executable
(caaba.exe)


input data files
(*.nc)
Fortran namelists
(*.nml)
model output
(*.nc, caaba.log)


full chemistry mechanism
(gas.spc, aqueous.spc,
gas.eqn, aqueous.eqn)
