# Supplementary material for: Oxidation of low-molecular weight organic compounds in clouddroplets: development of the JAMOC chemical mechanism inCAABA/MECCA (version 4.5.0gmdd)
Source: Copernicus journal article supplement (doi:10.5194/gmd-2020-337), 2020-10-29
Supplement: Supplementary file 20 [file gmd-2020-337-supplement.zip › caaba_4.5.0gmdd/manual/flowcontrol_xjvpp.odg]

## Slide: page1

xjvpp

step 3


compile
with
gmake
auxiliary MESSy files:
messy_*.f90
executable:
jvpp.exe


namelist files:
dat_lit/spectra/
[spc].nml
spectral information,
arbitrary wavelengths:
dat_lit/spectra/
[spc].sig, [spc].s2t, [spc].s3t,
[spc].phi, 
[spc].tc1, [spc].tc2, [spc].tc3
model output:
messy_jval_jvpp.inc, *.log


main JVPP Fortran files:
jvpp*.f90
step 2
execute
the model


step 1


spectral information, fixed wavelength grid:
workdir_176/[spc].*_176
effective values:
workdir_eff/[spc].ef[1-8]
also temperature-dependent:
workdir_eff/[spc].ef[1-8]_[temp]K
Fortran subroutines for
JVAL code:
workdir_f90/jval_cal_[spc].f90
hardcoded files:
dat_lit/hardcoded/
jval_cal_[spc].f90
combine
the results
