# Supplementary material for: Oxidation of low-molecular weight organic compounds in clouddroplets: development of the JAMOC chemical mechanism inCAABA/MECCA (version 4.5.0gmdd)
Source: Copernicus journal article supplement (doi:10.5194/gmd-2020-337), 2020-10-29
Supplement: Supplementary file 20 [file gmd-2020-337-supplement.zip › caaba_4.5.0gmdd/manual/kpp_use_diagr.odg]

## Slide: page1
Parameters
(NSPEC, NVAR, NFIX, NREACT, NONZERO, ind_*)
Monitor
(SPC_NAMES,
EQN_TAGS,
EQN_NAMES,
WANTED)
Global
(C, VAR, FIX, RCONST, TIME,
 TEMP, RTOLS, DT, ATOL, RTOL,
 STEPMIN,  STEPMAX, 
CFACTOR, method)
Rates
(k_3rd, k_arr,
Update_RCONST)
Function
(Fun, A)
Integrator
(integrate, IERR_NAMES)
Initialize
(initialize)


messy_mecca_kpp

Jacobian
(Jac_SP)
LinearAlgebra
(KppDecomp)
JacobianSP
(LU_IROW,
 LU_ICOL, 
LU_CROW,
 LU_DIAG)


Util
(tag2num)


Precision
(dp)

SMCL
