# Supplementary material for: Oxidation of low-molecular weight organic compounds in clouddroplets: development of the JAMOC chemical mechanism inCAABA/MECCA (version 4.5.0gmdd)
Source: Copernicus journal article supplement (doi:10.5194/gmd-2020-337), 2020-10-29
Supplement: Supplementary file 20 [file gmd-2020-337-supplement.zip › caaba_4.5.0gmdd/manual/lamago.gnu]

set term postscript eps color
set output "lamago.eps"
set xlabel "solar zenith angle (degree)"
set ylabel "Fcorr"
set dummy sza
#set logscale y

Fcorr1(sza) = exp(19.09*1  *(1-sza/87.5))
Fcorr2(sza) = exp(19.09*1.3*(1-sza/87.5))
Fcorr3(sza) = exp(19.09*1.4*(1-sza/87.5))
Fcorr4(sza) = exp(19.09*1.5*(1-sza/87.5))
Fcorr5(sza) = exp(19.09*2  *(1-sza/87.5))
Fcorr6(sza) = exp(19.09*3  *(1-sza/87.5))
Fcorr7(sza) = exp(19.09*4  *(1-sza/87.5))
Fcorr8(sza) = exp(19.09*5  *(1-sza/87.5))

plot [87.5:93] Fcorr1(sza), Fcorr2(sza), Fcorr3(sza), Fcorr4(sza), Fcorr5(sza), Fcorr6(sza), Fcorr7(sza), Fcorr8(sza)
