# Supplementary material for: Oxidation of low-molecular weight organic compounds in clouddroplets: development of the JAMOC chemical mechanism inCAABA/MECCA (version 4.5.0gmdd)
Source: Copernicus journal article supplement (doi:10.5194/gmd-2020-337), 2020-10-29
Supplement: Supplementary file 20 [file gmd-2020-337-supplement.zip › caaba_4.5.0gmdd/manual/modular-mecca.odg]

## Slide: page1


MESSy Interface
Global (3D) Model

CAABA Boxmodel
(insert here)
... other
submodels
MECCA
chemistry


(insert here)


SAPPHO
photolysis
SEMIDEP
emis, depos.


MESSy Interface
JVAL
photolysis
READJ
photolysis
TRAJECT
(Lagrangian)
