# Supplementary material for: Oxidation of low-molecular weight organic compounds in clouddroplets: development of the JAMOC chemical mechanism inCAABA/MECCA (version 4.5.0gmdd)
Source: Copernicus journal article supplement (doi:10.5194/gmd-2020-337), 2020-10-29
Supplement: Supplementary file 20 [file gmd-2020-337-supplement.zip › caaba_4.5.0gmdd/manual/polymecca_use_diagr.odg]

## Slide: page1

messy_mecca_kpp
messy_mecca003_kpp
messy_mecca002_kpp


messy_mecca_poly_si

messy_chemglue_si
messy_mecca_si
SMIL
SMCL

messy_chemglue
messy_mecca_mr2c_si.inc
messy_mecca_trac_si.inc
messy_mecca_c2mr_si.inc

messy_mecca002_mr2c_si.inc
messy_mecca002_trac_si.inc
messy_mecca002_c2mr_si.inc

messy_mecca003_mr2c_si.inc
messy_mecca003_trac_si.inc
messy_mecca003_c2mr_si.inc

kpp_integrate,
NSPEC, fill_*,
ind_*

meccanum

meccanum (CHEMGLUE channel)
kpp_integrate,
NSPEC, fill_*,
mr2c, c2mr
kpp_integrate,
NSPEC, fill_*,
ind_*
kpp_integrate,
NSPEC, fill_*,
ind_*
