# Supplementary material for: Oxidation of low-molecular weight organic compounds in clouddroplets: development of the JAMOC chemical mechanism inCAABA/MECCA (version 4.5.0gmdd)
Source: Copernicus journal article supplement (doi:10.5194/gmd-2020-337), 2020-10-29
Supplement: Supplementary file 20 [file gmd-2020-337-supplement.zip › caaba_4.5.0gmdd/mecca/decomp/seddecomp_ros2]

#!/bin/sh
#
###################################################
# change module messy_mecca_kpp.f90               #
# script that modifies kpp to remove implicit     #
# addressing for ROS2 with manual time stepping   #
###################################################
. ./locate_f90.sh
echo $F90
#
if test "$1" = "" ; then
   echo "USAGE: $0 <T/F>"
   echo "NOTE: T - remove if-statements"
   echo "      F - keep   if-statements"
   exit 1
fi
REMOVE=$1
#
#############################################################################
# GENERATE HEADER FOR DE-INDEXING PROGRAM
#############################################################################
#
cp -f ../smcl/messy_mecca_kpp_jacobiansp.f90 tmp_file
sed '{
/END MODULE messy_mecca_kpp_JacobianSP/d
s/MODULE messy_mecca_kpp_JacobianSP/PROGRAM decomp/g
s/PUBLIC/IMPLICIT NONE/g
s/SAVE//g
}
' tmp_file > tmp_decomp_1.f90
#
cp -f ../smcl/messy_mecca_kpp_parameters.f90 tmp_file
grep 'NVAR' tmp_file >> tmp_decomp_1.f90
#
#############################################################################
# KEEP PARTS OF THE CODE FOR DE-INDEXED MODULE messy_mecca_kpp_LinearAlgebra
#############################################################################
cp -f ../smcl/messy_mecca_kpp_linearalgebra.f90 tmp_file
sed '{
/SUBROUTINE KppDecomp( JVS, IER )/,//d
}
' tmp_file > tmp_decomp_1
sed '{
/MODULE messy_mecca_kpp_LinearAlgebra/,/END SUBROUTINE KppDecomp/d
}
' tmp_file > tmp_decomp_2
echo "END MODULE messy_mecca_kpp_LinearAlgebra" >> tmp_decomp_2

#############################################################################
# KEEP PARTS OF THE CODE FOR DE-INDEXED MODULE messy_mecca_kpp_Integrator
#############################################################################
cp -f ../smcl/messy_mecca_kpp_integrator.f90 tmp_file
sed '{
/! optionally cut this out and replace it by directly addressed statements/,/! End of INTEGRATE function/d
}
' tmp_file > tmp_integr_1

echo '    CALL KppDecomp (jvs, ising)' > tmp_integr_2
sed '{
/MODULE messy_mecca_kpp_Integrator/,/CALL KppDecomp (jvs, ising)/d
}
' tmp_file >> tmp_integr_2
echo "END MODULE messy_mecca_kpp_Integrator" >> tmp_integr_2

#############################################################################
# GENERATE PROGRAM CODE FOR DE-INDEXING PROGRAM
#############################################################################
cat > tmp_decomp_2.f90 << EOF

      INTEGER k, kk, j, jj, i

      OPEN(unit=11,file='tmp_decomp.out')
      OPEN(unit=12,file='tmp_integr.out')

!
!manipulate subroutine ros2 (messy_mecca_kpp_Integrator.f90)
!
     DO i=1,NVAR
        WRITE(12,'(4x,a4,i6,a8,i6,a10)') &
          'jvs(',LU_DIAG(i),') = jvs(',LU_DIAG(i),') + 1.0_dp'
     END DO

!
!manipulate subroutine KppDecomp (messy_mecca_kpp_LinearAlgebra.f90)
!
      WRITE(11,'(a32)') 'SUBROUTINE KppDecomp( JVS, IER )'
      WRITE(11,'(a67)') '! ~~~~~~~~~~~~~~~~~~~~~~~~~~~~~~~~~~~~~~~~~~~~~~~~~~~~~~~~~~~~~~~~~'
      WRITE(11,'(a32)') '!        Sparse LU factorization'
      WRITE(11,'(a67)') '! ~~~~~~~~~~~~~~~~~~~~~~~~~~~~~~~~~~~~~~~~~~~~~~~~~~~~~~~~~~~~~~~~~'
      WRITE(11,*) ''
      WRITE(11,'(2x,a31)') 'USE messy_mecca_kpp_Parameters'
      WRITE(11,'(2x,a31)') 'USE messy_mecca_kpp_JacobianSP'
      WRITE(11,*) ''
      WRITE(11,'(6x,a15)') 'INTEGER  :: IER'
      WRITE(11,'(6x,a45)') 'REAL(kind=dp) :: JVS(LU_NONZERO), W(NVAR), a'
      WRITE(11,'(6x,a24)') 'INTEGER  :: k, kk, j, jj'
      WRITE(11,*) ''
      WRITE(11,'(6x,a7)') 'IER = 0'
      WRITE(11,*) ''

      DO k=1,NVAR
EOF

if test "$REMOVE" = "F" ; then
cat >> tmp_decomp_2.f90 << EOF
        WRITE(11,'(8x,a9,i6,a17)') &
            'IF ( JVS(', LU_DIAG(k),' ) .EQ. 0. ) THEN'
        WRITE(11,'(8x,a6,i6)') 'IER = ', k
        WRITE(11,'(8x,a6)')    'RETURN'
        WRITE(11,'(8x,a6)')    'END IF'
EOF
fi

cat >> tmp_decomp_2.f90 << EOF
        DO kk = LU_CROW(k), LU_CROW(k+1)-1
              WRITE(11,'(6x,a2,i6,a9,i6,a1)') &
                  'W(', LU_ICOL(kk),' ) = JVS(',kk,')'
        END DO

        DO kk = LU_CROW(k), LU_DIAG(k)-1
            j = LU_ICOL(kk)
            WRITE(11,'(6x,a7,i6,a8,i6,a2)') &
                'a = -W(',j,') / JVS(', LU_DIAG(j),' )'
            WRITE(11,'(6x,a2,i6,a6)') &
                'W(',j,') = -a'

            DO jj = LU_DIAG(j)+1, LU_CROW(j+1)-1
               WRITE(11,'(6x,a2,i6,a7,i6,a11,i6,a1)') &
                  'W(', LU_ICOL(jj),' ) = W(', LU_ICOL(jj),' ) + a*JVS(',jj,')'
            END DO
         END DO

         if( LU_DIAG(k)-1 .GE. LU_CROW(k) ) THEN
           ! removes unnecessary statements

         DO kk = LU_CROW(k), LU_CROW(k+1)-1
             WRITE(11,'(6x,a4,i6,a6,i6,a2)') &
                'JVS(',kk,') = W(', LU_ICOL(kk),' )'
         END DO

         endif
      END DO

      WRITE(11,*) ''
      WRITE(11,*) 'END SUBROUTINE KppDecomp'

END PROGRAM decomp

EOF

cat tmp_decomp_1.f90 tmp_decomp_2.f90 > tmp_decomp.f90
$F90 tmp_decomp.f90
./a.out
rm -f a.out

### CREATE DE-INDEXED DECOMP
cat tmp_decomp_1 tmp_decomp.out tmp_decomp_2 > tmp_decomp_final
mv -f tmp_decomp_final ../smcl/messy_mecca_kpp_linearalgebra.f90

cat tmp_integr_1 tmp_integr.out tmp_integr_2 > tmp_integr_final
mv -f tmp_integr_final ../smcl/messy_mecca_kpp_integrator.f90

### CLEAN UP
rm -f tmp_file
#
rm -f tmp_decomp_1.f90
rm -f tmp_decomp_2.f90
rm -f tmp_decomp.f90
rm -f tmp_decomp.o
#
rm -f tmp_decomp_1
rm -f tmp_decomp_2
rm -f tmp_decomp.out
#
rm -f tmp_integr.out
rm -f tmp_integr_1
rm -f tmp_integr_2

exit
