# Supplementary material for: Oxidation of low-molecular weight organic compounds in clouddroplets: development of the JAMOC chemical mechanism inCAABA/MECCA (version 4.5.0gmdd)
Source: Copernicus journal article supplement (doi:10.5194/gmd-2020-337), 2020-10-29
Supplement: Supplementary file 20 [file gmd-2020-337-supplement.zip › caaba_4.5.0gmdd/mecca/decomp/xdecomp]

#! /bin/tcsh -f

if ($# == 0) then
   echo "USAGE: $0 <solver>"
exit 1
endif

set integr = $1

echo "remove if-statements in subroutine decomp ? [y/n/q, default=y]"
echo "NOTES: - those are expensive"
echo "       - those are nearly useless"
echo "       - those are even dangerous in case of #cpu > 1"

set inputstringif = "$<"
if ($inputstringif == "") then
   set inputstringif = "y"               # default
endif

switch ("$inputstringif")

case "q"
     exit
     breaksw

case "n"
     set REMOVE = "F"
     breaksw

case "y"
     set REMOVE = "T"
     breaksw

default:
     echo "ERROR: OPTION NOT RECOGNIZED"
     exit 1
     breaksw

endsw

  # select correct script for the chosen integrator
  switch ("$integr")

   case "ros2_manual.f90":

    echo "./seddecomp_ros2 "$REMOVE
    ./seddecomp_ros2 $REMOVE
    breaksw

   case "rosenbrock":
   case "rosenbrock_mz": 

    echo "./seddecomp_ros.auto "$REMOVE
    ./seddecomp_ros-auto $REMOVE
    breaksw

  default:

    echo "ERROR: removal of indirect indexing not possible"
    echo "       or not yet implemented for "$integr
    breaksw

  endsw

exit
