# Supplementary material for: Oxidation of low-molecular weight organic compounds in clouddroplets: development of the JAMOC chemical mechanism inCAABA/MECCA (version 4.5.0gmdd)
Source: Copernicus journal article supplement (doi:10.5194/gmd-2020-337), 2020-10-29
Supplement: Supplementary file 20 [file gmd-2020-337-supplement.zip › caaba_4.5.0gmdd/mecca/diagtrac/CCMItag.tex]

%op_vg_20130123+ -------------------------------------------------------------
% Explanations: 
% - The submodel  o3orig needs effective ozone production and loss terms. These are LossO3 and ProdO3.
% - For diagnostical purpose individual production and loss terms are defined:
%       Troposphere: ProdHO2    Production via NO+HO2
%                    ProdMeO2   Production via NO+CH3O2
%                    ProdRO2    Production via NO+RO2 
%                    LossOH     Ozone loss via O3+OH
%                    LossHO2    Ozone loss via O3+HO2
%                    LossO1D    Ozone loss via H2O+O1D (see Ozone definition below)
%                               = OH Production!
%       Stratosphere: LossO3x  x=O,N,H,Cl,Br Loss processes via Ox, NOx, HOx, ClOx and BrOx ozone desctruction.
% - ProdRO2 has been adapted to fit the ozone definition below.
% - Production terms for BrOx from emitted species according to their ilfetime (VSLS=s and others =l) dignosed
%   (op_pg)
% - rpl file ts2000.rpl considered
% - check that mecca_gas_mim1.eqn (04/2011) and gas_mim1.eqn (01/2013) leads
%   to same diagnostic
%op_vg_20130123- --------------------------------------------------------------
%
 % Automatically generated Prod and loss terms for the familly defined below
 % Used program: prodloss.f90 (V. Grewe)
 % Input: equationfile mecca.eqn
 % Family: O3 = 
 %                   1.  x O3
 %                +  1.  x O3P
 %                +  1.  x O1D
 %                +  1.  x ClO
 %                +  1.  x HOCl
 %                +  2.  x Cl2O2
 %                +  1.  x OClO
 %                +  1.  x NO2
 %                +  1.  x HNO3
 %                +  2.  x NO3
 %                +  3.  x N2O5
 %                +  1.  x HNO4
 %                +  1.  x PAN
 %                +  1.  x NACA
 %                +  1.  x MPAN
 %                +  1.  x IC3H7NO3
 %                +  1.  x LC4H9NO3
 %                +  1.  x ISON
 %                +  2.  x ClNO3
 %                +  1.  x BrO
 %                +  1.  x HOBr
 %                +  2.  x BrNO3
 %                +  1.  x SO2
 %                +  1.  x CH3SO2
 %                +  1.  x DMSO
 %                +  2.  x SO3
 %                +  2.  x H2SO4
 %                +  2.  x CH3SO3
 %                +  2.  x CH3SO3H
 <G1002a>        &  2.  LossO3 & O3 + O1D = 2 O2 : 
 <G1003>         &  2.  LossO3 & O3 + O3P = 2 O2 : 
 <G2101>         &  1.  LossO3 & H + O3 = OH + O2 : 
 <G2102>         &  1.  LossO3 & H2 + O1D = H + OH : 
 <G2103>         &  1.  LossO3 & OH + O3P = H + O2 : 
 <G2104>         &  1.  LossO3 & OH + O3 = HO2 + O2 : 
 <G2106>         &  1.  LossO3 & HO2 + O3P = OH + O2 : 
 <G2107>         &  1.  LossO3 & HO2 + O3 = OH + 2 O2 : 
 <G2108c>        &  1.  ProdO3 & HO2 + H = O3P + H2O : 
 <G2111>         &  1.  LossO3 & H2O + O1D = 2 OH : 
 <G3100>         &  1.  ProdO3 & N + O2 = NO + O3P : 
 <G3102a>        &  1.  LossO3 & N2O + O1D = 2 NO : 
 <G3102b>        &  1.  LossO3 & N2O + O1D = N2 + O2 : 
 <G3104>         &  1.  ProdO3 & NO + N = O3P + N2 : 
 <G3105>         &  2.  LossO3 & NO2 + O3P = NO + O2 : 
 <G3201>         &  1.  ProdO3 & NO + HO2 = NO2 + OH : 
 <G3204>         &  1.  LossO3 & NO3 + HO2 = NO2 + OH + O2 : 
 <G3205>         &  1.  ProdO3 & HONO + OH = NO2 + H2O : 
 <G3206>         &  1.  ProdO3 & HNO3 + OH = H2O + NO3 : 
 <G3210>         &  1.  LossO3 & NH2 + O3 = NH2O + O2 : 
 <G3215>         &  1.  LossO3 & NH2 + NO2 = N2O + H2O : 
 <G3216>         &  1.  LossO3 & NH2 + NO2 = NH2O + NO : 
 <G3217>         &  1.  LossO3 & NH2O + O3 = NH2 + O2 : 
 <G3221>         &  1.  LossO3 & HNO + NO2 = HONO + NO : 
 <G4100>         &  1.  LossO3 & CH4 + O1D = .75 CH3O2 + .75 OH + .25 HCHO + .4 H + .05 H2 : 
 <G4104>         &  1.  ProdO3 & CH3O2 + NO = HCHO + NO2 + HO2 : 
 <G4105>         &  1.  LossO3 & CH3O2 + NO3 = HCHO + HO2 + NO2 : 
 <G4109>         &  1.  LossO3 & HCHO + NO3 = HNO3 + CO + HO2 : 
 <G4201>         &  1.  LossO3 & C2H4 + O3 = HCHO + .63 CO + .13 HO2 + 0.23125 HCOOH + 0.13875 HCHO + 0.13875 H2O2 + .13 OH : 
 <G4204>         &  1.  ProdO3 & C2H5O2 + NO = CH3CHO + HO2 + NO2 : 
 <G4205>         &  1.  LossO3 & C2H5O2 + NO3 = CH3CHO + HO2 + NO2 : 
 <G4209>         &  1.  LossO3 & CH3CHO + NO3 = CH3CO3 + HNO3 : 
 <G4211b>        &  1.  ProdO3 & CH3CO3 + HO2 = CH3CO2H + O3 : 
 <G4212>         &  1.  ProdO3 & CH3CO3 + NO = CH3O2 + CO2 + NO2 : 
 <G4214>         &  1.  LossO3 & CH3CO3 + NO3 = CH3O2 + NO2 + CO2 : 
 <G4301>         &  1.  LossO3 & C3H6 + O3 = .57 HCHO + .47 CH3CHO + .33 OH + .26 HO2 + .07 CH3O2 + .06 C2H5O2 + .23 CH3CO3 + .04 MGLYOX + .06 CH4 + .31 CO + .22 HCOOH + .03 CH3OH : 
 <G4303>         &  1.  LossO3 & C3H6 + NO3 = LC4H9NO3 : 
 <G4305>         &  1.  ProdO3 & IC3H7O2 + NO = .96 CH3COCH3 + .96 HO2 + .96 NO2 + .04 IC3H7NO3 : 
 <G4309>         &  1.  ProdO3 & LHOC3H6O2 + NO = .98 CH3CHO + .98 HCHO + .98 HO2 + .98 NO2 + .02 LC4H9NO3 : 
 <G4313>         &  1.  ProdO3 & CH3COCH2O2 + NO = CH3CO3 + HCHO + NO2 : 
 <G4403>         &  1.  ProdO3 & LC4H9O2 + NO = .84 NO2 + .56 MEK + .56 HO2 + .28 C2H5O2 + .28 CH3CHO + .16 LC4H9NO3 : 
 <G4405>         &  1.  LossO3 & MVK + O3 = .45 HCOOH + .9 MGLYOX + .1 CH3CO3 + .19 OH + .22 CO + .32 HO2 : 
 <G4408>         &  1.  ProdO3 & MVKO2 + NO = NO2 + .25 CH3CO3 + .25 ACETOL + .75 HCHO + .25 CO + .75 HO2 + .5 MGLYOX : 
 <G4415>         &  1.  ProdO3 & LMEKO2 + NO = .985 CH3CHO + .985 CH3CO3 + .985 NO2 + .015 LC4H9NO3 : 
 <G4500>         &  1.  LossO3 & C5H8 + O3 = .28 HCOOH + .65 MVK + .1 MVKO2 + .1 CH3CO3 + .14 CO + .58 HCHO + .09 H2O2 + .08 CH3O2 + .25 OH + .25 HO2 : 
 <G4502>         &  1.  LossO3 & C5H8 + NO3 = ISON : 
 <G4504>         &  1.  ProdO3 & ISO2 + NO = .956 NO2 + .956 MVK + .956 HCHO + .956 HO2 + .044 ISON : 
 <G6101>         &  2.  LossO3 & ClO + O3P = Cl + O2 : 
 <G6102a>        &  2.  LossO3 & ClO + ClO = Cl2 + O2 : 
 <G6102b>        &  2.  LossO3 & ClO + ClO = 2 Cl + O2 : 
 <G6102c>        &  1.  LossO3 & ClO + ClO = Cl + OClO : 
 <G6201b>        &  1.  ProdO3 & Cl + HO2 = ClO + OH : 
 <G6203>         &  1.  LossO3 & ClO + OH = .94 Cl + .94 HO2 + .06 HCl + .06 O2 : 
 <G6403>         &  1.  LossO3 & ClO + CH3O2 = HO2 + Cl + HCHO : 
 <G6405>         &  1.  LossO3 & CH3Cl + O1D = LCARBON + OH + Cl : 
 <G6407>         &  1.  LossO3 & CH3CCl3 + O1D = 2 LCARBON + OH + 3 Cl : 
 <G7101>         &  2.  LossO3 & BrO + O3P = Br + O2 : 
 <G7102a>        &  2.  LossO3 & BrO + BrO = 2 Br + O2 : 
 <G7102b>        &  2.  LossO3 & BrO + BrO = Br2 + O2 : 
 <G7203>         &  1.  LossO3 & HOBr + O3P = OH + BrO : 
 <G7204>         &  1.  ProdO3 & Br2 + OH = HOBr + Br : 
 <G7402b>        &  1.  LossO3 & BrO + CH3O2 = Br + HCHO + HO2 : 
 <G7603a>        &  1.  LossO3 & BrO + ClO = Br + OClO : 
 <G7603b>        &  2.  LossO3 & BrO + ClO = Br + Cl + O2 : 
 <G7603c>        &  2.  LossO3 & BrO + ClO = BrCl + O2 : 
 <G9200a>        &  1.  ProdO3 & SO2 + OH = SO3 + HO2 : 
 <G9400a>        &  1.  ProdO3 & DMS + OH = CH3SO2 + HCHO : 
 <G9400b>        &  1.  ProdO3 & DMS + OH = DMSO + HO2 : 
 <G9402>         &  0.40000004  ProdO3 & DMSO + OH = .6 SO2 + HCHO + .6 CH3O2 + .4 HO2 + .4 CH3SO3H : 
 <G9600>         &  1.  ProdO3 & DMS + Cl = CH3SO2 + HCl + HCHO : 
 <G9700>         &  1.  ProdO3 & DMS + Br = CH3SO2 + HBr + HCHO : 
 <J1000a>        &  2.  ProdO3 & O2 + hv = O3P + O3P : 
 <J3100>         &  1.  ProdO3 & N2O + hv = O1D + N2 : 
 <J3102a>        &  1.  ProdO3 & NO + hv = N + O3P : 
 <J3103b>        &  2.  LossO3 & NO3 + hv = NO + O2 : 
 <J3202>         &  0.333  ProdO3 & HNO4 + hv = .667 NO2 + .667 HO2 + .333 NO3 + .333 OH : 
 <J4102>         &  1.  ProdO3 & CO2 + hv = CO + O3P : 
 <J6100>         &  2.  LossO3 & Cl2O2 + hv = 2 Cl : 
 <J6101>         &  1.  ProdO3 & OClO + hv = ClO + O3P : 
 <J6201>         &  1.  LossO3 & HOCl + hv = OH + Cl : 
 <J6300>         &  1.  ProdO3 & ClNO2 + hv = Cl + NO2 : 
 <J7200>         &  1.  LossO3 & HOBr + hv = Br + OH : 
 <J7300>         &  1.  ProdO3 & BrNO2 + hv = Br + NO2 : 
% <J7301>         &  5.9604645E-8  ProdO3 & BrNO3 + hv = .85 Br + .85 NO3 + .15 BrO + .15 NO2 : % op_pj_20170202 zero!
 <HET200>        &  1.  LossO3 & N2O5 + H2O = 2 HNO3 : 
 <HET201>        &  3.  LossO3 & N2O5 = 2 NO3m_cs + 2 Hp_cs : 
 <HET410>        &  1.  LossO3 & HOCl + HCl = Cl2 + H2O : 
 <HET420>        &  1.  LossO3 & ClNO3 + HCl = Cl2 + HNO3 : 
 <HET422>        &  2.  LossO3 & N2O5 + HCl = ClNO2 + HNO3 : 
 <HET510>        &  1.  LossO3 & HOBr + HBr = Br2 + H2O : 
 <HET540>        &  1.  LossO3 & ClNO3 + HBr = BrCl + HNO3 : 
 <HET541>        &  1.  LossO3 & BrNO3 + HCl = BrCl + HNO3 : 
 <HET542>        &  1.  LossO3 & HOCl + HBr = BrCl + H2O : 
 <HET543>        &  1.  LossO3 & HOBr + HCl = BrCl + H2O : 
 <G9100>         &  2.  ProdO3 & SO + O2 = SO2 + O3P : 
 <G9102>         &  1.  ProdO3 & S + O2 = SO + O3P : 
 <G9407>         &  1.  LossO3 & OCS + O3P = CO + SO : 
 <G6500dc01>     &  0.16999999  LossO3 & CHF2Cl + O1D = 0.55 ClO + 0.05 OH + 0.28 O3P + 0.28 CHF2Cl +0.72 LCARBON + 0.17 LCHLORINE: 
 <G5300dc01>     &  0.35000002  LossO3 & CH2FCF3 + O1D = 0.65 O3P + 0.65 CH2FCF3 + 0.24 OH + 0.70 LCARBON: 
 <G5300dc04>     &  0.23000002  LossO3 & CHF3 + O1D = 0.77 O3P + 0.77 CHF3 + 0.23 LCARBON : 
 <G6500dc05>     &  0.69  LossO3 & CH3CFCl2 + O1D = 0.31 O3P + 0.31 CH3CFCl2 + 0.69 LCARBON + 0.69 LCHLORINE: 
 <G6500dc08>     &  0.75  LossO3 & CF2ClCF2Cl + O1D = 0.25 O3P + 0.25 CF2ClCF2Cl + 0.75 LCARBON : 
 <G5300dc06>     &  0.76  LossO3 & CHF2CF3 + O1D = 0.24 O3P + 0.24 CHF2CF3 + 0.6 OH + 1.52 LCARBON : 
 <G5300dc08>     &  0.82  LossO3 & CH3CF3 + O1D = 0.18 O3P + 0.18 CH3CF3 + 0.38 OH + 0.8 LCARBON : 
 <G6500dc11>     &  0.3  LossO3 & CF3CF2Cl + O1D = 0.7 O3P + 0.7 CF3CF2Cl + 0.6 LCARBON : 
 <G5300dc10>     &  0.3  LossO3 & CH2F2 + O1D = 0.7 O3P + 0.7 CH2F2 + 0.3 LCARBON: 
 <G5300dc12>     &  0.65999997  LossO3 & CH3CHF2 + O1D = 0.34 O1D + 0.34 CH3CHF2 + 0.15 OH + LCARBON : 
%
%mz_pj_20080320+
% 'old' O3 budget diagnostic from Joeckel et al., (2006)
<G2107> & LossHO2        & HO2  + O3       = OH
<G2104> & LossOH         & OH   + O3       = HO2
<G2111> & LossO1D        & H2O  + O1D      = 2 OH 
<G3201> & ProdHO2        & NO   + HO2      = NO2   + OH
<G4104> & ProdMeO2       & CH3O2 + NO      = HCHO + NO2 + HO2
<G4204> & ProdRO2        & C2H5O2  + NO      = CH3CHO + HO2 + NO2
<G4212> & ProdRO2        & CH3CO3    + NO      = CH3O2 + NO2
%<G4305> & 0.96 ProdRO2   & IC3H7O2  + NO      = .96 CH3COCH3 + .96 HO2 + .96 NO2 + .04 IC3H7NO3  
%<G4309> & 0.98 ProdRO2   & LHOC3H6O2 + NO     = .98 CH3CHO + .98 HCHO + .98 HO2 + .98 NO2 + .02 LC4H9NO3 
<G4305> & ProdRO2   & IC3H7O2  + NO      = .96 CH3COCH3 + .96 HO2 + .96 NO2 + .04 IC3H7NO3          %op_vg_20130123
<G4305a> & ProdRO2   & IC3H7O2 + NO      = CH3COCH3 + HO2 + NO2 : % op_pj_20141104
<G4305b> & ProdRO2   & IC3H7O2 + NO      = IC3H7NO3             : % op_pj_20141104
<G4309> & ProdRO2   & LHOC3H6O2 + NO     = .98 CH3CHO + .98 HCHO + .98 HO2 + .98 NO2 + .02 LC4H9NO3 %op_vg_20130123
<G4309a> & ProdRO2       & LHOC3H6O2  + NO      = CH3CHO + HCHO + HO2 + NO2 : % op_pj_20141104
<G4309b> & 0.75 ProdRO2  & LHOC3H6O2  + NO  = .75 LC4H9NO3              : % op_pj_20141104
<G4313> & ProdRO2        & CH3COCH2O2  + NO    = NO2 + CH3CO3 + HCHO
<G4403> & ProdRO2        & LC4H9O2  + NO    = .84 NO2 + .56 MEK + .56 HO2 + .28 C2H5O2 + .84 CH3CHO + .16 LC4H9NO3
<G4403a> & ProdRO2       & LC4H9O2  + NO = NO2 + .667 MEK + .667 HO2 + .333 C2H5O2 + .333 CH3CHO : % op_pj_20141104
<G4403b> & ProdRO2       & LC4H9O2  + NO = LC4H9NO3 : % op_pj_20141104
<G4408> & ProdRO2        & MVKO2   + NO    = NO2 + .25 CH3CO3 + .25 ACETOL + .75 HCHO + .25 CO + .75 HO2 + .5 MGLYOX
%<G4415> & 0.985 ProdRO2  & LMEKO2   + NO    = .985 CH3CHO + .985 CH3CO3 + .985 NO2 + .015 LC4H9NO3  
%<G4504> & 0.956 ProdRO2 & ISO2  + NO      = .956 NO2 + .956 MVK + .956 HCHO + .956 HO2 + .044 ISON 
<G4415> & ProdRO2  & LMEKO2   + NO    = .985 CH3CHO + .985 CH3CO3 + .985 NO2 + .015 LC4H9NO3         %op_vg_20130123
<G4504> & ProdRO2 & ISO2  + NO      = .956 NO2 + .956 MVK + .956 HCHO + .956 HO2 + .044 ISON        %op_vg_20130123
<G4504b> & ProdRO2 & ISO2  + NO      = NO2 + MVK + HCHO + HO2  : % op_pj_20141104
<G4504c> & ProdRO2 & ISO2  + NO      = ISON                    : % op_pj_20141104
%mz_pj_20080320-
%
% op_vg_20170109+ -------------------------------------------------------------
% Ozone Prod and Loss grouped in Families
% Loss reactions
% O-Group: GHGs + O: O3, H2O, N2O, CH4, CFCs
 <G1002a>        &    2.0      LossO3O & O3 + O1D = 2 O2 : 
 <G1003>         &    2.0      LossO3O & O3 + O3P = 2 O2 : 
 <G2111>         &    1.0      LossO3O & H2O + O1D = 2 OH : 
 <G3102a>        &    1.0      LossO3O & N2O + O1D = 2 NO : 
 <G3102b>        &    1.0      LossO3O & N2O + O1D = N2 + O2 : 
 <G4100>         &    1.0      LossO3O & CH4 + O1D = .75 CH3O2 + .75 OH + .25 HCHO + .4 H + .05 H2 : 
 <G6500dc01>     &   0.1700000      LossO3O & CHF2Cl + O1D = 0.55 ClO + 0.05 OH + 0.28 O3P + 0.28 CHF2Cl +0.72 LCARBON + 0.17 LCHLORINE: 
 <G5300dc01>     &   0.3500000      LossO3O & CH2FCF3 + O1D = 0.65 O3P + 0.65 CH2FCF3 + 0.24 OH + 0.70 LCARBON: 
 <G5300dc04>     &   0.2300000      LossO3O & CHF3 + O1D = 0.77 O3P + 0.77 CHF3 + 0.23 LCARBON : 
 <G6500dc05>     &   0.6900000      LossO3O & CH3CFCl2 + O1D = 0.31 O3P + 0.31 CH3CFCl2 + 0.69 LCARBON + 0.69 LCHLORINE: 
 <G6500dc08>     &   0.7500000      LossO3O & CF2ClCF2Cl + O1D = 0.25 O3P + 0.25 CF2ClCF2Cl + 0.75 LCARBON : 
 <G5300dc06>     &   0.7600000      LossO3O & CHF2CF3 + O1D = 0.24 O3P + 0.24 CHF2CF3 + 0.6 OH + 1.52 LCARBON : 
 <G5300dc08>     &   0.8200000      LossO3O & CH3CF3 + O1D = 0.18 O3P + 0.18 CH3CF3 + 0.38 OH + 0.8 LCARBON : 
 <G6500dc11>     &   0.3000000      LossO3O & CF3CF2Cl + O1D = 0.7 O3P + 0.7 CF3CF2Cl + 0.6 LCARBON : 
 <G5300dc10>     &   0.3000000      LossO3O & CH2F2 + O1D = 0.7 O3P + 0.7 CH2F2 + 0.3 LCARBON: 
 <G5300dc12>     &   0.6600000      LossO3O & CH3CHF2 + O1D = 0.34 O1D + 0.34 CH3CHF2 + 0.15 OH + LCARBON : 
 %
 % HOx-Group (incl H-H2) ---------------------------------------
 <G2101>         &    1.0      LossO3H & H + O3 = OH + O2 : 
 <G2102>         &    1.0      LossO3H & H2 + O1D = H + OH : 
 <G2103>         &    1.0      LossO3H & OH + O3P = H + O2 : 
 <G2104>         &    1.0      LossO3H & OH + O3 = HO2 + O2 : 
 <G2106>         &    1.0      LossO3H & HO2 + O3P = OH + O2 : 
 <G2107>         &    1.0      LossO3H & HO2 + O3 = OH + 2 O2 : 
 %
 % NOx-Group ----------------------------------------------------
 <G3105>         &    2.0      LossO3N & NO2 + O3P = NO + O2 : 
 <G3204>         &    1.0      LossO3N & NO3 + HO2 = NO2 + OH + O2 : 
 <G3210>         &    1.0      LossO3N & NH2 + O3 = NH2O + O2 : 
 <G3215>         &    1.0      LossO3N & NH2 + NO2 = N2O + H2O : 
 <G3216>         &    1.0      LossO3N & NH2 + NO2 = NH2O + NO : 
 <G3217>         &    1.0      LossO3N & NH2O + O3 = NH2 + O2 : 
 <G3221>         &    1.0      LossO3N & HNO + NO2 = HONO + NO : 
 <J3103b>        &    2.0      LossO3N & NO3 + hv = NO + O2 : 
 <HET200>        &    1.0      LossO3N & N2O5 + H2O = 2 HNO3 : 
 <HET201>        &    3.0      LossO3N & N2O5 = 2 NO3m_cs + 2 Hp_cs : 
 % also in Cl 
 <HET420>        &    0.500000      LossO3N & ClNO3 + HCl = Cl2 + HNO3 : 
 <HET422>        &    1.0      LossO3N & N2O5 + HCl = ClNO2 + HNO3 : 
 % also in Cl and Br
 <HET540>        &    0.333333      LossO3N & ClNO3 + HBr = BrCl + HNO3 : 
 <HET541>        &    0.333333      LossO3N & BrNO3 + HCl = BrCl + HNO3 : 
 %
 % R-Group ------------------------------------------------------
 <G4105>         &    1.0      LossO3R & CH3O2 + NO3 = HCHO + HO2 + NO2 : 
 <G4109>         &    1.0      LossO3R & HCHO + NO3 = HNO3 + CO + HO2 : 
 <G4201>         &    1.0      LossO3R & C2H4 + O3 = HCHO + .63 CO + .13 HO2 + 0.23125 HCOOH + 0.13875 HCHO + 0.13875 H2O2 + .13 OH : 
 <G4205>         &    1.0      LossO3R & C2H5O2 + NO3 = CH3CHO + HO2 + NO2 : 
 <G4209>         &    1.0      LossO3R & CH3CHO + NO3 = CH3CO3 + HNO3 : 
 <G4214>         &    1.0      LossO3R & CH3CO3 + NO3 = CH3O2 + NO2 + CO2 : 
 <G4301>         &    1.0      LossO3R & C3H6 + O3 = .57 HCHO + .47 CH3CHO + .33 OH + .26 HO2 + .07 CH3O2 + .06 C2H5O2 + .23 CH3CO3 + .04 MGLYOX + .06 CH4 + .31 CO + .22 HCOOH + .03 CH3OH : 
 <G4303>         &    1.0      LossO3R & C3H6 + NO3 = LC4H9NO3 : 
 <G4405>         &    1.0      LossO3R & MVK + O3 = .45 HCOOH + .9 MGLYOX + .1 CH3CO3 + .19 OH + .22 CO + .32 HO2 : 
 <G4500>         &    1.0      LossO3R & C5H8 + O3 = .28 HCOOH + .65 MVK + .1 MVKO2 + .1 CH3CO3 + .14 CO + .58 HCHO + .09 H2O2 + .08 CH3O2 + .25 OH + .25 HO2 : 
 <G4502>         &    1.0      LossO3R & C5H8 + NO3 = ISON : 
 %
 % Cl-Group ------------------------------------------------------
 <G6101>         &    2.0      LossO3Cl & ClO + O3P = Cl + O2 : 
 <G6102a>        &    2.0      LossO3Cl & ClO + ClO = Cl2 + O2 : 
 <G6102b>        &    2.0      LossO3Cl & ClO + ClO = 2 Cl + O2 : 
 <G6102c>        &    1.0      LossO3Cl & ClO + ClO = Cl + OClO : 
 <G6203>         &    1.0      LossO3Cl & ClO + OH = .94 Cl + .94 HO2 + .06 HCl + .06 O2 : 
 <G6403>         &    1.0      LossO3Cl & ClO + CH3O2 = HO2 + Cl + HCHO : 
 <G6405>         &    1.0      LossO3Cl & CH3Cl + O1D = LCARBON + OH + Cl : 
 <G6407>         &    1.0      LossO3Cl & CH3CCl3 + O1D = 2 LCARBON + OH + 3 Cl : 
 % also in Br
 <G7603a>        &    0.500000      LossO3Cl & BrO + ClO = Br + OClO : 
 <G7603b>        &    1.0      LossO3Cl & BrO + ClO = Br + Cl + O2 : 
 <G7603c>        &    1.0      LossO3Cl & BrO + ClO = BrCl + O2 : 
 <J6100>         &    2.0      LossO3Cl & Cl2O2 + hv = 2 Cl : 
 <J6201>         &    1.0      LossO3Cl & HOCl + hv = OH + Cl : 
 <HET410>        &    1.0      LossO3Cl & HOCl + HCl = Cl2 + H2O : 
 % also in N
 <HET420>        &    0.500000      LossO3Cl & ClNO3 + HCl = Cl2 + HNO3 : 
 <HET422>        &    1.0      LossO3Cl & N2O5 + HCl = ClNO2 + HNO3 : 
 % also in Br and N
 <HET540>        &    0.333333      LossO3Cl & ClNO3 + HBr = BrCl + HNO3 : 
 <HET541>        &    0.333333      LossO3Cl & BrNO3 + HCl = BrCl + HNO3 : 
 % also in Br
 <HET542>        &    0.500000      LossO3Cl & HOCl + HBr = BrCl + H2O : 
 <HET543>        &    0.500000      LossO3Cl & HOBr + HCl = BrCl + H2O : 
%
% Br-Group ------------------------------------------------------
 <G7101>         &    2.0      LossO3Br & BrO + O3P = Br + O2 : 
 <G7102a>        &    2.0      LossO3Br & BrO + BrO = 2 Br + O2 : 
 <G7102b>        &    2.0      LossO3Br & BrO + BrO = Br2 + O2 : 
 <G7203>         &    1.0      LossO3Br & HOBr + O3P = OH + BrO : 
 <G7402b>        &    1.0      LossO3Br & BrO + CH3O2 = Br + HCHO + HO2 : 
 % also in Cl
 <G7603a>        &    0.500000      LossO3Br & BrO + ClO = Br + OClO : 
 <G7603b>        &    1.0      LossO3Br & BrO + ClO = Br + Cl + O2 : 
 <G7603c>        &    1.0      LossO3Br & BrO + ClO = BrCl + O2 : 
 % 
 <J7200>         &    1.0      LossO3Br & HOBr + hv = Br + OH : 
 <HET510>        &    1.0      LossO3Br & HOBr + HBr = Br2 + H2O : 
 %$ Also in Cl and in N
 <HET540>        &    0.333333      LossO3Br & ClNO3 + HBr = BrCl + HNO3 : 
 <HET541>        &    0.333333      LossO3Br & BrNO3 + HCl = BrCl + HNO3 : 
 <HET542>        &    0.500000      LossO3Br & HOCl + HBr = BrCl + H2O : 
 <HET543>        &    0.500000      LossO3Br & HOBr + HCl = BrCl + H2O : 
 %
 % S-Group ------------------------------------------------------
 <G9407>         &  1.0  LossO3Su & OCS + O3P = CO + SO : 
 
% op_pg_20130122+ -------------------------------------------------------------
%budget analysis for short-lived halogens L=long-lived S=short-lived
%
%Cl
<G6404>       &  4.0  ProdLCl & CCl4 + O1D = ClO + 3 Cl :
<G6405>       &  1.0  ProdLCl & CH3Cl + O1D = OH + Cl :
<G6406>       &  1.0  ProdLCl & CH3Cl + OH  = H2O + Cl :
<G6407>       &  3.0  ProdLCl & CH3CCl3 + O1D = OH + 3 Cl :
<G6408>       &  3.0  ProdLCl & CH3CCl3 + OH  = H2O + 3 Cl :
<G6500>       &  2.0  ProdLCl & CF2Cl2 + O1D = ClO + Cl :
<G6501>       &  3.0  ProdLCl & CFCl3 + O1D = ClO + 2 Cl :
<G6500dc01>   &  0.55 ProdLCl & :
<J6500dc01>   &  1.0  ProdLCl & :
<G6500dc04>   &  0.8  ProdLCl & :
<J6500dc02>   &  1.0  ProdLCl & :
<J6400dc01>   &  2.0  ProdLCl & :
<J6500dc03>   &  1.0  ProdLCl & :
<J6500dc04>   &  2.0  ProdLCl & :
<J6400dc02>   &  1.0  ProdLCl & :
<J6500dc05>   &  1.0  ProdLCl & :

%
%Br
<G7403>        &  1.0  ProdLBr & CH3Br + OH = H2O + Br :
<G7407>        &  3.0  ProdSBr & CHBr3 + OH = H2O + 3 Br :
<G7408>        &  2.0  ProdSBr & CH2Br2 + OH = H2O + 2 Br :
%
%------------ also Cl-Production ----
<G7605>        &  1.0  ProdSBr + 2.0 ProdSCl & CHCl2Br + OH = H2O + Br + 2 Cl:
<G7606>        &  2.0  ProdSBr + 1.0 ProdSCl & CHClBr2 + OH = H2O + 2 Br + Cl :
<G7607>        &  1.0  ProdSBr + 1.0 ProdSCl & CH2ClBr + OH = H2O + Br + Cl :
%------------                    ----
%
%Photolysis
%
%Cl
<J6400>        &  1.0  ProdLCl & CH3Cl + hv = Cl + CH3O2 :
<J6401>        &  4.0  ProdLCl & CCl4  + hv = 4 Cl  :
<J6402>        &  3.0  ProdLCl & CH3CCl3 + hv = 3 Cl :
<J6500>        &  3.0  ProdLCl & CFCl3 + hv = 3 Cl :
<J6501>        &  2.0  ProdLCl & CF2Cl2 + hv = 2 Cl :
%
%Br
<J7400>        &  1.0  ProdLBr & CH3Br + hv = Br + CH3O2 :
<J7401>        &  2.0  ProdSBr & CH2Br2 + hv = 2 Br :
<J7402>        &  3.0  ProdSBr & CHBr3 + hv = 3 Br :
<J7500>        &  1.0  ProdLBr & CF3Br + hv = Br :
%
%---Cl+Br
<J7601>        &  1.0  ProdLBr + 1.0 ProdLCl & CF2ClBr + hv = Br + Cl :
<J7602>        &  1.0  ProdSBr + 1.0 ProdSCl & CH2ClBr + hv = Br + Cl :
<J7603>        &  1.0  ProdSBr + 2.0 ProdSCl & CHCl2Br + hv = Br + 2 Cl :
<J7604>        &  2.0  ProdSBr + 1.0 ProdSCl & CHClBr2 + hv = 2 Br + Cl :
%
%I J8401 I-Production?
%
%op_pg_20130122- --------------------------------------------------------------
%
%%---------------------------------------------------------------------------
%% % op_vg_20100615+
%% % Diagnostics for tagging module in addition to O3 budget diagnostic!
%% % o3prodHO2=ProdHO2;   o3prodRO2=ProdRO2+ProdMeO2
%% %
 
% <G1002>  & o3lossXO & O3   + O1D      = 2 O2       %ok LossO3
% <G1003>  & o3lossXO & O3   + O3P      = 2 O2       %ok LossO3
% <G2101>  & o3lossXO & H    + O3       = OH
% <G2102>  & o3lossXO & H2   + O1D      = H + OH
% <G2103>  & o3lossOH & OH  + O3P     = H 
 %%%  No ozone loss if HO2 reacts with NO
% <G2104>  & o3lossXO & OH   + O3       = HO2
% <G2106>  & o3lossXO & HO2  + O3P      = OH 
%% % And this one too?
% <G2107>  & o3lossXO & HO2  + O3       = OH 
% <G2111>  & o3lossXO & H2O  + O1D      = 2 OH
% <G3102a> & o3lossXO & N2O  + O1D      = 2 NO 
% <G3103>  & o3lossNO & NO   + O3       = NO2 + O2
%%% Whether there is a loss depends on the subsequent reaction G3105
%% %      should that then be double counted?
% <G3105>  & o3lossNO & NO2  + O3P      = NO + O2
% <G4201>  & o3lossRO & C2H4 + O3       = HCHO + .22 HO2 + .12 OH + .23 CO + .54 HCOOH + .1 H2
% <G4301>  & o3lossRO & C3H6 + O3       = .57 HCHO + .47 CH3CHO + .33 OH + .26 HO2 + .07 CH3O2 + .06 EtO2 + .23 PA + .04 CH3COCHO + .06 CH4 + .31 CO + .22 HCOOH + .03 CH3OH
% <G4405>  & o3lossRO & MVK   + O3      = .45 HCOOH + .9 CH3COCHO + .1 PA + .19 OH + .22 CO + .32 HO2
% <G4500>  & o3lossRO & ISOP  + O3      = .28 HCOOH + .65 MVK + .1 MVKO2  + .1 PA + .14 CO + .58 HCHO + .09 H2O2 + .08 CH3O2 + .25 OH + .25 HO2
% <G6100>  & o3lossXO & Cl + O3         = ClO
% <G6101>  & o3lossXO & ClO + O3P       = Cl
% (#G6404>  & o3lossXO & CCl4    + O1D   = ClO + 3 Cl {+...>
% <G6405>  & o3lossXO & CH3Cl   + O1D   = OH + Cl {+...> 
% <G6407>  & o3lossXO & CH3CCl3 + O1D   = OH + 3 Cl {+...>
% <G6500>  & o3lossXO & CF2Cl2  + O1D   = ClO + Cl {+...>
% <G6501>  & o3lossXO & CFCl3   + O1D   = ClO + 2 Cl {+...>
% <G7100>  & o3lossXO & Br   + O3       = BrO
% <G7101>  & o3lossXO & BrO  + O3P      = Br + O2 
% <G7203>  & o3lossXO & HOBr + O3P      = OH  + BrO  
% <G9404>  & o3lossXO & CH3SO2 + O3     = CH3SO3
%% %
% <G2111>  & ohprod    & H2O  + O1D      = 2 OH  
%% %
 <G4213>  & panprod   & PA   + NO2     = PAN
 <G4220>  & panloss   & PAN  + OH      = HCHO + NO2     
 <G4221>  & panloss   & PAN  {+M>      = PA + NO2    
 <G3102a> & noprodN2O & N2O  + O1D     = 2 NO 
%% for OH chemistry ...
%<J3201>  &  ohprodHNO3    & HNO3 + hv  = !nt used
%<J2101>  &  ohprodH2O2    & H2O2 + hv  = !nt used
<G3202>  &  ohlossNO2     & NO2  + OH  =   
<G3205>  &  ohlossNO2     & HONO + OH = NO2 + H2O  
<G3206>  &  ohlossNO2     & HNO3 + OH = H2O + NO3  

<G2110>  &  ho2lossHO2    & HO2  + HO2 =
<G4104>  &  noprodHO2     & CH3O2+ NO  =  
<G4103> &   ho2loss       & CH3O2+ HO2 =       
<G2109>  &  lossho2oh     & HO2  + OH  =
%<G3201> &  prodho2       & NO   + HO2 =   !fyi
%<G2111> &  LossO1D       & H2O  + O1D =   !fyi

%seper. prod-loss
%***************************************************************
%%%%%%%%%%%%%%%% prod O3 %%%%%%%%%%%%%%%%%%%%%%%%%%%%%%%%%%%%%%%%%

  <J1000a>  & o3prodo2 & O2   + hv       = O3P + O3P  

  %NOy + HO2 combination: O3prod_ho2 
 <G3201>        & 1.0   o3prodho2   & NO + HO2 = NO2 + OH :
 <G3205>        & 1.0   o3prodho2   & HONO + OH = NO2 + H2O : 
 <G3206>        & 1.0   o3prodho2   & HNO3 + OH = H2O + NO3 : 
 <G4305>        & 1.0   o3prodho2   & IC3H7O2 + NO = .96 CH3COCH3 + .96 HO2 + .96 NO2 + .04 IC3H7NO3 : 
 <G4305a>       & 1.0   o3prodho2   & IC3H7O2 + NO = CH3COCH3 + HO2 + NO2 : % op_pj_20141104
 <G4305b>       & 1.0   o3prodho2   & IC3H7O2 + NO = IC3H7NO3             : % op_pj_20141104
 <G8302>        & 1.0   o3prodho2   & IO + NO = I + NO2 :       
 <G8304>        & 1.0   o3prodho2   & OIO + NO = NO2 + IO :   
 <J3202>        & 0.333 o3prodho2   & HNO4 + hv = .667 NO2 + .667 HO2 + .333 NO3 + .333 OH : 
 <J3100>        & 1.0   o3prodho2   & N2O + hv = O1D : 

%NOy + NMHC combination: O3prod_ro2
 <G4104>        &  1.0  o3prodro2  & CH3O2 + NO = HCHO + NO2 + HO2 : 
 <G4204>        &  1.0  o3prodro2  & C2H5O2 + NO = CH3CHO + HO2 + NO2 : 
 <G4211b>       &  1.0  o3prodro2  & CH3CO3 + HO2 = CH3CO2H + O3 : 
 <G4212>        &  1.0  o3prodro2  & CH3CO3 + NO = CH3O2 + NO2 : 
 <G4309>        &  1.0  o3prodro2  & LHOC3H6O2 + NO = .98 CH3CHO + .98 HCHO + .98 HO2 + .98 NO2 + .02 LC4H9NO3 : 
 <G4309a>       &  1.0  o3prodro2  & LHOC3H6O2 + NO = CH3CHO + HCHO + HO2 + NO2 % op_pj_20141104
 <G4309b>       &  0.75 o3prodro2  & LHOC3H6O2 + NO = .75 LC4H9NO3              % op_pj_20141104
 <G4313>        &  1.0  o3prodro2  & CH3COCH2O2 + NO = NO2 + CH3CO3 + HCHO : 
 <G4403>        &  1.0  o3prodro2  & LC4H9O2 + NO = .84 NO2 + .56 MEK + .56 HO2 + .28 C2H5O2 + .28 CH3CHO + .16 LC4H9NO3 :  
 <G4403a>       &  1.0 o3prodro2 & LC4H9O2 + NO = NO2 + .667 MEK + .667 HO2 + .333 C2H5O2 + .333 CH3CHO : % op_pj_20141104
 <G4403b>       &  1.0  o3prodro2  & LC4H9O2 + NO = LC4H9NO3                                              : % op_pj_20141104
 <G4408>        &  1.0  o3prodro2  & MVKO2 + NO = NO2 + .25 CH3CO3 + .25 ACETOL + .75 HCHO + .25 CO + .75 HO2 + .5 MGLYOX : 
 <G4415>        &  1.0  o3prodro2  & LMEKO2 + NO = .985 CH3CHO + .985 CH3CO3 + .985 NO2 + .015 LC4H9NO3 : 
 <G4504>        &  1.0  o3prodro2  & % op_pj_20141104
 <G4504b>       &  1.0  o3prodro2  & ISO2  + NO        = NO2 + MVK + HCHO + HO2      : % op_pj_20141104
 <G4504c>       &  1.0  o3prodro2  & ISO2  + NO        = ISON : % op_pj_20141104


%*****************************************************************************
%%%%%%%%%%%%%%%%%%%%Loss O3%%%%%%%%%%%%%%%%%%%%%%%%%%%%%%%%%%%%%%%%%%%%%%%%%%%

% OH + O3 combination: O3loss_OH

 <G2104>        &  1.0  o3lossoh & OH + O3 = HO2 : 
% <G6203b>       &  1.0  o3lossoh & ClO + OH = HCl : 

% HO2 + O3 combination: O3loss_HO2

  <G2107>        &  1.0 o3lossho2  & HO2 + O3 = OH : 


% NOy + O3 combination: O3loss_NO
 <G3204>        &  1.0  o3lossno  & NO3 + HO2 = NO2 + OH + O2 : 
 <G4105>        &  1.0  o3lossno  & CH3O2 + NO3 = HCHO + HO2 + NO2 : 
 <G4109>        &  1.0  o3lossno  & HCHO + NO3 = HNO3 + CO + HO2 : 
 <G4205>        &  1.0  o3lossno  & C2H5O2 + NO3 = CH3CHO + HO2 + NO2 : 
 <G4209>        &  1.0  o3lossno  & CH3CHO + NO3 = CH3CO3 + HNO3 : 
 <G4214>        &  1.0  o3lossno  & CH3CO3 + NO3 = CH3O2 + NO2 : 
 <G4303>        &  1.0  o3lossno  & C3H6 + NO3 = LC4H9NO3 : 
 <G4502>        &  1.0  o3lossno  & C5H8 + NO3 = ISON : 
 <HET541>       &  1.0  o3lossno  & BrNO3 + HCl = BrCl + HNO3 : 
 <HET540>       &  1.0  o3lossno  & ClNO3 + HBr = BrCl + HNO3 : 
 <HET420>       &  1.0  o3lossno  & ClNO3 + HCl = Cl2 + HNO3 : 
 <HET200>       &  1.0  o3lossno  & N2O5 + H2O = HNO3 + HNO3 : 

% NMHC + O3 combination: O3loss_ro
 <G4405>        &  1.0  o3lossro & MVK + O3 = .45 HCOOH + .9 MGLYOX + .1 CH3CO3 + .19 OH + .22 CO + .32 HO2 : 
 <G4201>        &  1.0  o3lossro & C2H4 + O3 = HCHO + .22 HO2 + .12 OH + .23 CO + .54 HCOOH + .1 H2 : 
 <G6403>        &  1.0  o3lossro & ClO + CH3O2 = HO2 + Cl + HCHO : 
 <G7402b>       &  1.0  o3lossro & BrO + CH3O2 = Br + HCHO + HO2: 
 <G8303>        &  1.0  o3lossro & IO + NO2 = INO3 {+M> : 
 <G8307>        &  2.0  o3lossro & I2 + NO3 = I + INO3 : 
 <G9401>        &  1.0  o3lossro & DMS + NO3 = CH3SO2 + HNO3 + HCHO {-O3>: 

% O3 ...: O3loss_xo
 <G1002a>        &  2.0  o3lossxo & O3 + O1D = 2 O2 : 
 <G2101>        &  1.0  o3lossxo & H + O3 = OH : 
 <G2102>        &  1.0  o3lossxo & H2 + O1D = H + OH : 
 <G2111>        &  1.0  o3lossxo & H2O + O1D = 2 OH :  
 <G3102a>       &  1.0  o3lossxo & N2O + O1D = 2 NO : 
 <G3102b>       &  1.0  o3lossxo & N2O + O1D = N2 + O2 : 
 <G4100>        &  1.0  o3lossxo & CH4 + O1D = .75 CH3O2 + .75 OH + .25 HCHO + .4 H + .05 H2 : 
 <G6405>        &  1.0  o3lossxo & CH3Cl + O1D = OH + Cl {+...> :
 <G6407>        &  1.0  o3lossxo & CH3CCl3 + O1D = OH + 3 Cl {+...> : 
 <G8100>        &  1.0  o3lossxo & I + O3 = IO + O2 : 
 <G9404>        &  1.0  o3lossxo & CH3SO2 + O3 = CH3SO3 :

%---------------------OH------------------------------------------------------
%Prod____
%<G2101>  & LossO3        & H    + O3       = OH
%<G2102>  & LossO3        & H2   + O1D      = H + OH
%<G2106>  & LossO3        & HO2  + O3P      = OH 
%<G2107>  & LossHO2       & HO2  + O3       = OH
%<G2111>  & LossO1D       & H2O  + O1D      = 2 OH 
%<G3201>  & ProdHO2       & NO   + HO2      = NO2   + OH
%<G3204>  &  1.0  o3lossno  & NO3 + HO2 = NO2 + OH + O2 : 
%<G4100>  &  1.0  o3lossxo & CH4 + O1D = .75 CH3O2 + .75 OH + .25 HCHO + .4 H + .05 H2 : 
%<G4201>  &  1.0  o3lossro & C2H4 + O3 = HCHO + .22 HO2 + .12 OH + .23 CO + .54 HCOOH + .1 H2 :
%<G4301>  & LossO3        & C3H6    + O3      = .57 HCHO + .47 CH3CHO + .33 OH + .26 HO2 + .07 CH3O2 + .06 C2H5O2 + .23 CH3CO3 + .04 MGLYOX + .06 CH4 + .31 CO + .22 HCOOH + .03 CH3OH
%<G4405>  & LossO3        & MVK     + O3      = .45 HCOOH + .9 MGLYOX + .1 CH3CO3 + .19 OH + .22 CO + .32 HO2
%<G4500>  & LossO3        & C5H8  + O3        = .28 HCOOH + .65 MVK + .1 MVKO2  + .1 CH3CO3 + .14 CO + .58 HCHO + .09 H2O2 + .08 CH3O2 + .25 OH + .25 HO2
%<G6405>  &  1.0  o3lossxo & CH3Cl + O1D = OH + Cl {+...> :
%<G6407>  & LossO3        & CH3CCl3 + O1D    = OH + 3 Cl {+...>
%<G7203>  & LossO3        & HOBr + O3P      = OH  + BrO  
%<J3202>  & 0.333 o3prodho2   & HNO4 + hv = .667 NO2 + .667 HO2 + .333 NO3 + .333 OH : 
 
%Loss_____

%<G2104>  & LossOH         & OH   + O3       = HO2
%<G2104>  &  1.0  o3lossoh & OH + O3 = HO2 : 
%<G6203b> &  1.0  o3lossoh & ClO + OH = HCl : 
%<G3205>  & 1.0   o3prodho2   & HONO + OH = NO2 + H2O : 
%<G3206>  & 1.0   o3prodho2   & HNO3 + OH = H2O + NO3 :
%<G2109>  &  lossho2oh     & HO2  + OH  =
 
%---------------------HO2-----------------------------------------------------

%% % op_vg_20100615-
