# Supplementary material for: Oxidation of low-molecular weight organic compounds in clouddroplets: development of the JAMOC chemical mechanism inCAABA/MECCA (version 4.5.0gmdd)
Source: Copernicus journal article supplement (doi:10.5194/gmd-2020-337), 2020-10-29
Supplement: Supplementary file 20 [file gmd-2020-337-supplement.zip › caaba_4.5.0gmdd/mecca/diagtrac/EDITh-ua_strat_test.tex]

%op_vg_20130123+
<G0013i>   & 1.0  NOpem1           & NOp   + em        = O3P + N      
<G0014i>   & 1.0  NOpem2           & NOp   + em        = O3P + N2D
<G0001i>   & 1.0  N2pO3p1          & N2p   + O3P       = NOp + N2D
<G0002i>   & 1.0  N2pO3p2          & N2p   + O3P       = NOp + N
<G0011i>   & 1.0  O4SpN2           & O4Sp   + N2       = NOp + N
<G0023i>   & 1.0  O4SpNO           & O4Sp  + NO        = NOp + O3P
<G0031i>   & 1.0  NpO2             & Np  + O2          = NOp + O3P
%----------------------------------------------------------
