# Supplementary material for: Oxidation of low-molecular weight organic compounds in clouddroplets: development of the JAMOC chemical mechanism inCAABA/MECCA (version 4.5.0gmdd)
Source: Copernicus journal article supplement (doi:10.5194/gmd-2020-337), 2020-10-29
Supplement: Supplementary file 20 [file gmd-2020-337-supplement.zip › caaba_4.5.0gmdd/mecca/diagtrac/old/airtrac.tex]

 % manually changed by C. Froemming (16.05.2011) 
 % Automatically generated Prod and loss terms for the familly defined below
 % Used program: prodloss.f90 (V. Grewe)
 % Input: equationfile mecca_gas_mim1.eqn
 % Family: O3 = 
 %                   1.  x O3
 %                +  1.  x O3P
 %                +  1.  x O1D
 %                +  1.  x ClO
 %                +  1.  x HOCl
 %                +  2.  x Cl2O2
 %                +  1.  x OClO
 %                +  1.  x NO2
 %                +  1.  x HNO3
 %                +  2.  x NO3
 %                +  3.  x N2O5
 %                +  1.  x HNO4
 %                +  1.  x PAN
 %                +  1.  x NACA
 %                +  1.  x MPAN
 %                +  1.  x IC3H7NO3
 %                +  1.  x LC4H9NO3
 %                +  1.  x ISON
 %                +  2.  x ClNO3
 %                +  1.  x BrO
 %                +  1.  x HOBr
 %                +  2.  x BrNO3
 % airtrac O3 loss via N
 <G3105>         &  2.  LossO3N & NO2 + O3P = NO + O2 :
 % airtrac O3 loss via all other reactions
 <G1002>         &  2.  LossO3Y & O3 + O1D = 2 O2 : 
 <G1003>         &  2.  LossO3Y & O3 + O3P = 2 O2 : 
 <G2101>         &  1.  LossO3Y & H + O3 = OH + O2 : 
 <G2102>         &  1.  LossO3Y & H2 + O1D = H + OH : 
 <G2103>         &  1.  LossO3Y & OH + O3P = H + O2 : 
 <G2104>         &  1.  LossO3Y & OH + O3 = HO2 + O2 : 
 <G2106>         &  1.  LossO3Y & HO2 + O3P = OH + O2 : 
 <G2107>         &  1.  LossO3Y & HO2 + O3 = OH + 2 O2 : 
 <G2111>         &  1.  LossO3Y & H2O + O1D = 2 OH : 
 <G3102a>        &  1.  LossO3Y & N2O + O1D = 2 NO : 
 <G3102b>        &  1.  LossO3Y & N2O + O1D = N2 + O2 : 
 <G3105>         &  2.  LossO3Y & NO2 + O3P = NO + O2 : 
 <G3204>         &  1.  LossO3Y & NO3 + HO2 = NO2 + OH + O2 : 
 <G3210>         &  1.  LossO3Y & NH2 + O3 = NH2O + O2 : 
 <G3215>         &  1.  LossO3Y & NH2 + NO2 = N2O + H2O : 
 <G3216>         &  1.  LossO3Y & NH2 + NO2 = NH2O + NO : 
 <G3217>         &  1.  LossO3Y & NH2O + O3 = NH2 + O2 : 
 <G3221>         &  1.  LossO3Y & HNO + NO2 = HONO + NO : 
 <G4100>         &  1.  LossO3Y & CH4 + O1D = .75 CH3O2 + .75 OH + .25 HCHO + .4 H + .05 H2 : 
 <G4105>         &  1.  LossO3Y & CH3O2 + NO3 = HCHO + HO2 + NO2 : 
 <G4109>         &  1.  LossO3Y & HCHO + NO3 = HNO3 + CO + HO2 : 
 <G4201>         &  1.  LossO3Y & C2H4 + O3 = HCHO + .22 HO2 + .12 OH + .23 CO + .54 HCOOH + .1 H2 : 
 <G4205>         &  1.  LossO3Y & C2H5O2 + NO3 = CH3CHO + HO2 + NO2 : 
 <G4209>         &  1.  LossO3Y & CH3CHO + NO3 = CH3CO3 + HNO3 : 
 <G4214>         &  1.  LossO3Y & CH3CO3 + NO3 = CH3O2 + NO2 : 
 <G4303>         &  1.  LossO3Y & C3H6 + NO3 = LC4H9NO3 : 
 <G4405>         &  1.  LossO3Y & MVK + O3 = .45 HCOOH + .9 MGLYOX + .1 CH3CO3 + .19 OH + .22 CO + .32 HO2 : 
 <G4502>         &  1.  LossO3Y & C5H8 + NO3 = ISON : 
 <G6101>         &  2.  LossO3Y & ClO + O3P = Cl + O2 : 
 <G6102a>        &  2.  LossO3Y & ClO + ClO = Cl2 + O2 : 
 <G6102b>        &  2.  LossO3Y & ClO + ClO = 2 Cl + O2 : 
 <G6102c>        &  1.  LossO3Y & ClO + ClO = Cl + OClO : 
 <G6203>         &  1.  LossO3Y & ClO + OH = .94 Cl + .94 HO2 + .06 HCl + .06 O2 : 
 <G6403>         &  1.  LossO3Y & ClO + CH3O2 = HO2 + Cl + HCHO : 
 <G6405>         &  1.  LossO3Y & CH3Cl + O1D = OH + Cl {+...} : 
 <G6407>         &  1.  LossO3Y & CH3CCl3 + O1D = OH + 3 Cl {+...} : 
 <G7101>         &  2.  LossO3Y & BrO + O3P = Br + O2 : 
 <G7102a>        &  2.  LossO3Y & BrO + BrO = 2 Br + O2 : 
 <G7102b>        &  2.  LossO3Y & BrO + BrO = Br2 + O2 : 
 <G7203>         &  1.  LossO3Y & HOBr + O3P = OH + BrO : 
 <G7402b>        &  1.  LossO3Y & BrO + CH3O2 = Br + HCHO + HO2: 
 <G7603a>        &  1.  LossO3Y & BrO + ClO = Br + OClO : 
 <G7603b>        &  2.  LossO3Y & BrO + ClO = Br + Cl + O2 : 
 <G7603c>        &  2.  LossO3Y & BrO + ClO = BrCl + O2 : 
 <G8100>         &  1.  LossO3Y & I + O3 = IO + O2 : 
 <G8300>         &  1.  LossO3Y & I + NO2 {+M} = INO2 : 
 <G8301>         &  1.  LossO3Y & I + NO3 = IO + NO2 : 
 <G8303>         &  1.  LossO3Y & IO + NO2 {+M} = INO3 : 
 <G8307>         &  2.  LossO3Y & I2 + NO3 = I + INO3 : 
 <G8308>         &  1.  LossO3Y & IO + NO3 = OIO + NO2 : 
 <G8402>         &  1.  LossO3Y & CH3I + NO3 {+O2} = HNO3 + HCHO + IO : 
 <G8600>         &  0.45  LossO3Y & IO + ClO = .2 ICl + .25 Cl + .55 OClO + .8 I + .45 O2 : 
 <G8700>         &  1.  LossO3Y & I + BrO = IO + Br : 
 <G8701>         &  1.  LossO3Y & IO + BrO = Br + .8 OIO + .2 I + .2 O2 : 
 <G9401>         &  1.  LossO3Y & DMS + NO3 = CH3SO2 + HNO3 + HCHO {-O3}: 
 <G9404>         &  1.  LossO3Y & CH3SO2 + O3 = CH3SO3 : 
 <G9701>         &  1.  LossO3Y & DMS + BrO = DMSO + Br : 
 <G10100>        &  1.  LossO3Y & Hg + O3 = HgO + O2 : 
 <G10703>        &  1.  LossO3Y & Hg + BrO = HgO + Br : 
 <G10704>        &  1.  LossO3Y & HgBr + BrO = BrHgOBr : 
 <G10705>        &  1.  LossO3Y & HgCl + BrO = ClHgOBr : 
 <J3103b>        &  2.  LossO3Y & NO3 + hv = NO : 
 <J6100>         &  2.  LossO3Y & Cl2O2 + hv = 2 Cl : 
 <J6201>         &  1.  LossO3Y & HOCl + hv = OH + Cl : 
 <J7200>         &  1.  LossO3Y & HOBr + hv = Br + OH : 
 <J7301>         &  1.1920929E-7  LossO3Y & BrNO3 + hv = 0.29 Br + 0.29 NO3 + 0.71 BrO + 0.71 NO2 : 
 <HET200>        &  1.  LossO3Y & N2O5 + H2O = 2 HNO3 : 
 <HET201>        &  3.  LossO3Y & N2O5 = 2 NO3m_cs + 2 Hp_cs : 
 <HET410>        &  1.  LossO3Y & HOCl + HCl = Cl2 + H2O : 
 <HET420>        &  1.  LossO3Y & ClNO3 + HCl = Cl2 + HNO3 : 
 <HET422>        &  2.  LossO3Y & N2O5 + HCl = ClNO2 + HNO3 : 
 <HET510>        &  1.  LossO3Y & HOBr + HBr = Br2 + H2O : 
 <HET540>        &  1.  LossO3Y & ClNO3 + HBr = BrCl + HNO3 : 
 <HET541>        &  1.  LossO3Y & BrNO3 + HCl = BrCl + HNO3 : 
 <HET542>        &  1.  LossO3Y & HOCl + HBr = BrCl + H2O : 
 <HET543>        &  1.  LossO3Y & HOBr + HCl = BrCl + H2O : 
 % airtrac O3 production
 <G2108c>        &  1.  ProdO3  & HO2 + H = O3P + H2O :
 <G3100>         &  1.  ProdO3  & N + O2 = NO + O3P :
 <G3104>         &  1.  ProdO3  & NO + N = O3P + N2 :
 <G3201>         &  1.  ProdO3N & NO + HO2 = NO2 + OH :
 <G3205>         &  1.  ProdO3  & HONO + OH = NO2 + H2O :
 <G3206>         &  1.  ProdO3  & HNO3 + OH = H2O + NO3 :
 <G4104>         &  1.  ProdO3N & CH3O2 + NO = HCHO + NO2 + HO2 :
 <G4204>         &  1.  ProdO3N & C2H5O2 + NO = CH3CHO + HO2 + NO2 :
 <G4211b>        &  1.  ProdO3  & CH3CO3 + HO2 = CH3CO2H + O3 :
 <G4212>         &  1.  ProdO3N & CH3CO3 + NO = CH3O2 + NO2 :
 <G4305>         &  1.  ProdO3N & IC3H7O2 + NO = .96 CH3COCH3 + .96 HO2 + .96 NO2 + .04 IC3H7NO3 :
 <G4309>         &  1.  ProdO3N & LHOC3H6O2 + NO = .98 CH3CHO + .98 HCHO + .98 HO2 + .98 NO2 + .02 LC4H9NO3 :
 <G4313>         &  1.  ProdO3N & CH3COCH2O2 + NO = NO2 + CH3CO3 + HCHO :
 <G4403>         &  1.  ProdO3N & LC4H9O2 + NO = .84 NO2 + .56 MEK + .56 HO2 + .28 C2H5O2 + .28 CH3CHO + .16 LC4H9NO3 :
 <G4408>         &  1.  ProdO3N & MVKO2 + NO = NO2 + .25 CH3CO3 + .25 ACETOL + .75 HCHO + .25 CO + .75 HO2 + .5 MGLYOX :
 <G4415>         &  1.  ProdO3N & LMEKO2 + NO = .985 CH3CHO + .985 CH3CO3 + .985 NO2 + .015 LC4H9NO3 :
 <G4504>         &  1.  ProdO3N & ISO2 + NO = .88 NO2 + .88 MVK + .88 HCHO + .88 HO2 + .12 ISON :
 <G4504a>        &  1.  ProdO3N & ISO2 + NO = .956 NO2 + .956 MVK + .956 HCHO + .956 HO2 + .044 ISON :
 <G6201b>        &  1.  ProdO3  & Cl + HO2 = ClO + OH :
 <G7204>         &  1.  ProdO3  & Br2 + OH = HOBr + Br :
 <G8302>         &  1.  ProdO3  & IO + NO = I + NO2 :
 <G8304>         &  1.  ProdO3  & OIO + NO = NO2 + IO :
 <G8305>         &  1.  ProdO3  & INO2 = I + NO2 :
 <G8306>         &  1.  ProdO3  & INO3 = IO + NO2 :
 <J1000>         &  2.  ProdO3  & O2 + hv = O3P + O3P :
 <J3100>         &  1.  ProdO3  & N2O + hv = O1D :
 <J3102>         &  1.  ProdO3  & NO + hv = N + O3P :
 <J3202>         &  0.333  ProdO3 & HNO4 + hv = .667 NO2 + .667 HO2 + .333 NO3 + .333 OH :
 <J4204>         &  0.40000004  ProdO3 & PAN + hv = .6 CH3CO3 + .6 NO2 + .4 CH3O2 + .4 NO3 + .4 CO2 :
 <J4102>         &  1.  ProdO3  & CO2 + hv = CO + O3P :
 <J6101>         &  1.  ProdO3  & OClO + hv = ClO + O3P :
 <J6300>         &  1.  ProdO3  & ClNO2 + hv = Cl + NO2 :
 <J7300>         &  1.  ProdO3Y & BrNO2 + hv = Br + NO2 :
 <J8100>         &  1.  ProdO3Y & IO + hv = I + O3P :
 <J8300>         &  1.  ProdO3Y & INO2 + hv = I + NO2 :
 <J8301>         &  2.  ProdO3Y & INO3 + hv = I + NO3 :
% op_cf_20110419+
%% NOx loss through HNO3 formation
 <G3202>	 &  1.  LossNOx	& NO2  + OH    	= HNO3 :
% op_cf_20110419-
% op_cf_20111006+
%% HNO3 loss
 <G3206>	 &  1. LossHNO3	& HNO3 + OH    	= H2O   + NO3 :
 <J3201>  	 &  1. LossHNO3 & HNO3 + hv 	= NO2 + OH :
% op_cf_20111006-
% op_vg_20110915+
% OH chemistry
 <G2111>         &  2.  ProdOH1 & H2O + O1D = 2 OH :
 <G2107>         &  1.  ProdOH2 & HO2 + O3 = OH + 2 O2 :
 <G3201>         &  1.  ProdOH3 & NO + HO2 = NO2 + OH :
 <G2104>         &  1.  LossOH1 & OH + O3 = HO2 + O2 :
 <G4110>         &  1.  LossOH2 & CO + OH = H + CO2 :
 <G4200>         &  1.  LossOH3 & C2H6 + OH = C2H5O2 + H2O :
 <G4202>         &  1.  LossOH3 & C2H4 + OH {+M} = .6666667 LHOC3H6O2 :
 <G4208>         &  1.  LossOH3 & CH3CHO + OH = CH3CO3 + H2O :
 <G4210>         &  1.  LossOH3 & CH3CO2H + OH = CH3O2 :
 <G4218>         &  1.  LossOH3 & CH3CO3H + OH = CH3CO3 :
 <G4300>         &  1.  LossOH3 & C3H8 + OH = .82 IC3H7O2 + .18 C2H5O2 + H2O :
 <G4302>         &  1.  LossOH3 & C3H6 + OH {+M} = LHOC3H6O2 :
 <G4311>         &  1.  LossOH3 & CH3COCH3 + OH = CH3COCH2O2 + H2O :
 <G4400>         &  1.  LossOH3 & NC4H10 + OH = LC4H9O2 + H2O :
 <G4501>         &  1.  LossOH3 & C5H8 + OH = ISO2 :
 <G4508>         &  1.  LossOH3 & ISON + OH = ACETOL + NACA :
 <G4101>         &  1.  LossOH4 & CH4 + OH = CH3O2 + H2O :
 <G2109>         &  1.  LossOH5 & HO2 + OH = H2O :
 <G4104>         &  1.  ProdHO21 & CH3O2 + NO = HCHO + NO2 + HO2 :
 <G4204>         &  1.  ProdHO21 & C2H5O2 + NO = CH3CHO + HO2 + NO2 :
 <G4305>         &  0.96  ProdHO21 & IC3H7O2 + NO = .96 CH3COCH3 + .96 HO2 + .96 NO2 + .04 IC3H7NO3 :
 <G4309>         &  0.98  ProdHO21 & LHOC3H6O2 + NO = .98 CH3CHO + .98 HCHO + .98 HO2 + .98 NO2 + .02 LC4H9NO3 :
 <G4403>         &  0.56  ProdHO21 & LC4H9O2 + NO = .84 NO2 + .56 MEK + .56 HO2 + .28 C2H5O2 + .28 CH3CHO + .16 LC4H9NO3 :
 <G4408>         &  0.75  ProdHO21 & MVKO2 + NO = NO2 + .25 CH3CO3 + .25 ACETOL + .75 HCHO + .25 CO + .75 HO2 + .5 MGLYOX :
 <G4504>         &  0.88  ProdHO21 & ISO2 + NO = .88 NO2 + .88 MVK + .88 HCHO + .88 HO2 + .12 ISON :
 <G4103a>        &  1.  LossHO21 & CH3O2 + HO2 = CH3OOH :
 <G4203>         &  1.  LossHO21 & C2H5O2 + HO2 = C2H5OOH :
 <G4211a>        &  1.  LossHO21 & CH3CO3 + HO2 = CH3CO3H :
 <G4211b>        &  1.  LossHO21 & CH3CO3 + HO2 = CH3CO2H + O3 :
 <G4304>         &  1.  LossHO21 & IC3H7O2 + HO2 = IC3H7OOH :
 <G4308>         &  1.  LossHO21 & LHOC3H6O2 + HO2 = LHOC3H6OOH :
 <G4312>         &  1.  LossHO21 & CH3COCH2O2 + HO2 = HYPERACET :
 <G4402>         &  1.  LossHO21 & LC4H9O2 + HO2 = LC4H9OOH :
 <G4407>         &  1.  LossHO21 & MVKO2 + HO2 = MVKOOH :
 <G4414>         &  1.  LossHO21 & LMEKO2 + HO2 = LMEKOOH :
 <G4503>         &  1.  LossHO21 & ISO2 + HO2 = ISOOH :
 <G2110>         &  2.  LossHO22 & HO2 + HO2 = H2O2 :
% op_vg_20110915-
