# Supplementary material for: Oxidation of low-molecular weight organic compounds in clouddroplets: development of the JAMOC chemical mechanism inCAABA/MECCA (version 4.5.0gmdd)
Source: Copernicus journal article supplement (doi:10.5194/gmd-2020-337), 2020-10-29
Supplement: Supplementary file 20 [file gmd-2020-337-supplement.zip › caaba_4.5.0gmdd/mecca/diagtrac/old/CCMI-airtrac.tex]

%% %op_vg_20130123+
%% % Explanations: 
%% % - The submodel  o3orig needs effective ozone production and loss terms. These are LossO3 and ProdO3.
%% % - For diagnostical purpose individual production and loss terms are defined:
%% %       Troposphere: ProdHO2    Production via NO+HO2
%% %                    ProdMeO2   Production via NO+CH3O2
%% %                    ProdRO2    Production via NO+RO2 
%% %                    LossOH     Ozone loss via O3+OH
%% %                    LossHO2    Ozone loss via O3+HO2
%% %                    LossO1D    Ozone loss via H2O+O1D (see Ozone definition below)
%% %                               = OH Production!
%% %       Stratosphere: LossO3x  x=O,N,H,Cl,Br Loss processes via Ox, NOx, HOx, ClOx and BrOx ozone desctruction.
%% % - ProdRO2 has been adapted to fit the ozone definition below.
%% % - Production terms for BrOx from emitted species according to their ilfetime (VSLS=s and others =l) dignosed
%% %   (op_pg)
%% % - rpl file ts2000.rpl considered
%% % - check that mecca_gas_mim1.eqn (04/2011) and gas_mim1.eqn (01/2013) leads to same diagnostic
%% %op_vg_20130123-
%%  % Automatically generated Prod and loss terms for the familly defined below
%%  % Used program: prodloss.f90 (V. Grewe)
%%  % Input: equationfile mecca.eqn
%%  % Family: O3 = 
%%  %                   1.  x O3
%%  %                +  1.  x O3P
%%  %                +  1.  x O1D
%%  %                +  1.  x ClO
%%  %                +  1.  x HOCl
%%  %                +  2.  x Cl2O2
%%  %                +  1.  x OClO
%%  %                +  1.  x NO2
%%  %                +  1.  x HNO3
%%  %                +  2.  x NO3
%%  %                +  3.  x N2O5
%%  %                +  1.  x HNO4
%%  %                +  1.  x PAN
%%  %                +  1.  x NACA
%%  %                +  1.  x MPAN
%%  %                +  1.  x IC3H7NO3
%%  %                +  1.  x LC4H9NO3
%%  %                +  1.  x ISON
%%  %                +  2.  x ClNO3
%%  %                +  1.  x BrO
%%  %                +  1.  x HOBr
%%  %                +  2.  x BrNO3
%%  %                +  1.  x SO2
%%  <G1002a>        &  2.  LossO3 & O3 + O1D = 2 O2 : 
%%  <G1003>         &  2.  LossO3 & O3 + O3P = 2 O2 : 
%%  <G1004>         &  1.  ProdO3 & O2 + Op = O2p + O3P : 
%%  <G1101>         &  2.  ProdO3 & O2p + em = 2 O3P : 
%%  <G2101>         &  1.  LossO3 & H + O3 = OH + O2 : 
%%  <G2102>         &  1.  LossO3 & H2 + O1D = H + OH : 
%%  <G2103>         &  1.  LossO3 & OH + O3P = H + O2 : 
%%  <G2104>         &  1.  LossO3 & OH + O3 = HO2 + O2 : 
%%  <G2106>         &  1.  LossO3 & HO2 + O3P = OH + O2 : 
%%  <G2107>         &  1.  LossO3 & HO2 + O3 = OH + 2 O2 : 
%%  <G2108c>        &  1.  ProdO3 & HO2 + H = O3P + H2O : 
%%  <G2111>         &  1.  LossO3 & H2O + O1D = 2 OH : 
%%  <G2113>         &  1.  LossO3 & H2 + O3P = H + OH : 
%%  <G2114a>        &  1.  ProdO3 & OH + OH = H2O + O3P : 
%%  <G2116>         &  1.  LossO3 & H2O2 + O3P = OH + HO2 : 
%%  <G3001>         &  1.  ProdO3 & NOp + em = 0.15 N + 0.85 N2D + O3P : 
%%  <G3100>         &  1.  ProdO3 & N + O2 = NO + O3P : 
%%  <G3102a>        &  1.  LossO3 & N2O + O1D = 2 NO : 
%%  <G3102b>        &  1.  LossO3 & N2O + O1D = N2 + O2 : 
%%  <G3104>         &  1.  ProdO3 & NO + N = O3P + N2 : 
%%  <G3105>         &  2.  LossO3 & NO2 + O3P = NO + O2 : 
%%  <G3111>         &  1.  ProdO3 & N2D + NO = N2 + O3P : 
%%  <G3112>         &  1.  ProdO3 & N2D + O2 = NO + O3P : 
%%  <G3114>         &  1.  LossO3 & N2D + O3 = NO + O2 : 
%%  <G3119>         &  1.  LossO3 & N2p + O3P = NOp + N2D : 
%%  <G3120a>        &  1.  ProdO3 & Np + O2 = NOp + O3P : 
%%  <G3121>         &  1.  LossO3 & Np + O3P = Op + N : 
%%  <G3122>         &  1.  ProdO3 & O2p + N = NOp + O3P : 
%%  <G3201>         &  1.  ProdO3 & NO + HO2 = NO2 + OH : 
%%  <G3204>         &  1.  LossO3 & NO3 + HO2 = NO2 + OH + O2 : 
%%  <G3205>         &  1.  ProdO3 & HONO + OH = NO2 + H2O : 
%%  <G3206>         &  1.  ProdO3 & HNO3 + OH = H2O + NO3 : 
%%  <G3210>         &  1.  LossO3 & NH2 + O3 = NH2O + O2 : 
%%  <G3215>         &  1.  LossO3 & NH2 + NO2 = N2O + H2O : 
%%  <G3216>         &  1.  LossO3 & NH2 + NO2 = NH2O + NO : 
%%  <G3217>         &  1.  LossO3 & NH2O + O3 = NH2 + O2 : 
%%  <G3221>         &  1.  LossO3 & HNO + NO2 = HONO + NO : 
%%  <G3226>         &  1.  LossO3 & NO2 + H = NO + OH : 
%%  <G4100>         &  1.  LossO3 & CH4 + O1D = .75 CH3O2 + .75 OH + .25 HCHO + .4 H + .05 H2 : 
%%  <G4104>         &  1.  ProdO3 & CH3O2 + NO = HCHO + NO2 + HO2 : 
%%  <G4105>         &  1.  LossO3 & CH3O2 + NO3 = HCHO + HO2 + NO2 : 
%%  <G4109>         &  1.  LossO3 & HCHO + NO3 = HNO3 + CO + HO2 : 
%%  <G4112>         &  1.  LossO3 & CO + O3P = CO2 : 
%%  <G4113>         &  1.  LossO3 & CH4 + O3P = CO + 2 OH + H2O : 
%%  <G4201>         &  1.  LossO3 & C2H4 + O3 = HCHO + .63 CO + .13 HO2 + 0.23125 HCOOH + 0.13875 HCHO + 0.13875 H2O2 + .13 OH : 
%%  <G4204>         &  1.  ProdO3 & C2H5O2 + NO = CH3CHO + HO2 + NO2 : 
%%  <G4205>         &  1.  LossO3 & C2H5O2 + NO3 = CH3CHO + HO2 + NO2 : 
%%  <G4209>         &  1.  LossO3 & CH3CHO + NO3 = CH3CO3 + HNO3 : 
%%  <G4211b>        &  1.  ProdO3 & CH3CO3 + HO2 = CH3CO2H + O3 : 
%%  <G4212>         &  1.  ProdO3 & CH3CO3 + NO = CH3O2 + CO2 + NO2 : 
%%  <G4214>         &  1.  LossO3 & CH3CO3 + NO3 = CH3O2 + NO2 + CO2 : 
%%  <G4301>         &  1.  LossO3 & C3H6 + O3 = .57 HCHO + .47 CH3CHO + .33 OH + .26 HO2 + .07 CH3O2 + .06 C2H5O2 + .23 CH3CO3 + .04 MGLYOX + .06 CH4 + .31 CO + .22 HCOOH + .03 CH3OH : 
%%  <G4303>         &  1.  LossO3 & C3H6 + NO3 = LC4H9NO3 : 
%%  <G4305>         &  1.  ProdO3 & IC3H7O2 + NO = .96 CH3COCH3 + .96 HO2 + .96 NO2 + .04 IC3H7NO3 : 
%%  <G4305a>        &  1.  ProdO3 & IC3H7O2 + NO = CH3COCH3 + HO2 + NO2 : % op_pj_20141104
%%  <G4305b>        &  1.  ProdO3 & IC3H7O2 + NO = IC3H7NO3             : % op_pj_20141104
%%  <G4309>         &  1.  ProdO3 & LHOC3H6O2 + NO = .98 CH3CHO + .98 HCHO + .98 HO2 + .98 NO2 + .02 LC4H9NO3 : 
%%  <G4309a>        &  1.  ProdO3  & LHOC3H6O2  + NO = CH3CHO + HCHO + HO2 + NO2 : % op_pj_20141104
%%  <G4309b>        &  0.75 ProdO3 & LHOC3H6O2  + NO = .75 LC4H9NO3              : % op_pj_20141104
%%  <G4313>         &  1.  ProdO3 & CH3COCH2O2 + NO = CH3CO3 + HCHO + NO2 : 
%%  <G4403>         &  1.  ProdO3 & LC4H9O2 + NO = .84 NO2 + .56 MEK + .56 HO2 + .28 C2H5O2 + .28 CH3CHO + .16 LC4H9NO3 : 
%%  <G4403a>        &  1.  ProdO3 & LC4H9O2 + NO = NO2 + .667 MEK + .667 HO2 + .333 C2H5O2 + .333 CH3CHO : % op_pj_20141104
%%  <G4403b>        &  1.  ProdO3 & LC4H9O2 + NO = LC4H9NO3                                              : % op_pj_20141104
%%  <G4405>         &  1.  LossO3 & MVK + O3 = .45 HCOOH + .9 MGLYOX + .1 CH3CO3 + .19 OH + .22 CO + .32 HO2 : 
%%  <G4408>         &  1.  ProdO3 & MVKO2 + NO = NO2 + .25 CH3CO3 + .25 ACETOL + .75 HCHO + .25 CO + .75 HO2 + .5 MGLYOX : 
%%  <G4415>         &  1.  ProdO3 & LMEKO2 + NO = .985 CH3CHO + .985 CH3CO3 + .985 NO2 + .015 LC4H9NO3 : 
%%  <G4500>         &  1.  LossO3 & C5H8 + O3 = .28 HCOOH + .65 MVK + .1 MVKO2 + .1 CH3CO3 + .14 CO + .58 HCHO + .09 H2O2 + .08 CH3O2 + .25 OH + .25 HO2 : 
%%  <G4502>         &  1.  LossO3 & C5H8 + NO3 = ISON : 
%%  <G4504>         &  1.  ProdO3 & ISO2 + NO = .956 NO2 + .956 MVK + .956 HCHO + .956 HO2 + .044 ISON : % op_pj_20111204
%%  <G4504b>        &  1.  ProdO3 & ISO2 + NO = NO2 + MVK + HCHO + HO2 : % op_pj_20141104
%%  <G4504c>        &  1.  ProdO3 & ISO2 + NO = ISON                   : % op_pj_20141104
%%  <G6101>         &  2.  LossO3 & ClO + O3P = Cl + O2 : 
%%  <G6102a>        &  2.  LossO3 & ClO + ClO = Cl2 + O2 : 
%%  <G6102b>        &  2.  LossO3 & ClO + ClO = 2 Cl + O2 : 
%%  <G6102c>        &  1.  LossO3 & ClO + ClO = Cl + OClO : 
%%  <G6201b>        &  1.  ProdO3 & Cl + HO2 = ClO + OH : 
%%  <G6203>         &  1.  LossO3 & ClO + OH = .94 Cl + .94 HO2 + .06 HCl + .06 O2 : 
%%  <G6403>         &  1.  LossO3 & ClO + CH3O2 = HO2 + Cl + HCHO : 
%%  <G6405>         &  1.  LossO3 & CH3Cl + O1D = OH + Cl : 
%%  <G6407>         &  1.  LossO3 & CH3CCl3 + O1D = OH + 3 Cl : 
%%  <G7101>         &  2.  LossO3 & BrO + O3P = Br + O2 : 
%%  <G7102a>        &  2.  LossO3 & BrO + BrO = 2 Br + O2 : 
%%  <G7102b>        &  2.  LossO3 & BrO + BrO = Br2 + O2 : 
%%  <G7203>         &  1.  LossO3 & HOBr + O3P = OH + BrO : 
%%  <G7204>         &  1.  ProdO3 & Br2 + OH = HOBr + Br : 
%%  <G7402b>        &  1.  LossO3 & BrO + CH3O2 = Br + HCHO + HO2 : 
%%  <G7603a>        &  1.  LossO3 & BrO + ClO = Br + OClO : 
%%  <G7603b>        &  2.  LossO3 & BrO + ClO = Br + Cl + O2 : 
%%  <G7603c>        &  2.  LossO3 & BrO + ClO = BrCl + O2 : 
%%  <G8100>         &  1.  LossO3 & I + O3 = IO + O2 : 
%%  <G8300>         &  1.  LossO3 & I + NO2 = INO2 : 
%%  <G8301>         &  1.  LossO3 & I + NO3 = IO + NO2 : 
%%  <G8302>         &  1.  ProdO3 & IO + NO = I + NO2 : 
%%  <G8303>         &  1.  LossO3 & IO + NO2 = INO3 : 
%%  <G8304>         &  1.  ProdO3 & OIO + NO = NO2 + IO : 
%%  <G8305>         &  1.  ProdO3 & INO2 = I + NO2 : 
%%  <G8306>         &  1.  ProdO3 & INO3 = IO + NO2 : 
%%  <G8307>         &  2.  LossO3 & I2 + NO3 = I + INO3 : 
%%  <G8308>         &  1.  LossO3 & IO + NO3 = OIO + NO2 : 
%%  <G8402>         &  1.  LossO3 & CH3I + NO3 = HNO3 + HCHO + IO : 
%%  <G8600>         &  0.45  LossO3 & IO + ClO = .2 ICl + .25 Cl + .55 OClO + .8 I + .45 O2 : 
%%  <G8700>         &  1.  LossO3 & I + BrO = IO + Br : 
%%  <G8701>         &  1.  LossO3 & IO + BrO = Br + .8 OIO + .2 I + .2 O2 : 
%%  <G9200>         &  1.  LossO3 & SO2 + OH = H2SO4 + HO2 : 
%%  <G9200a>        &  1.  LossO3 & SO2 + OH = SO3 + HO2 :
%%  <G9401>         &  1.  LossO3 & DMS + NO3 = CH3SO2 + HNO3 + HCHO : 
%%  <G9402>         &  0.6  ProdO3 & DMSO + OH = .6 SO2 + HCHO + .6 CH3O2 + .4 HO2 + .4 CH3SO3H : 
%%  <G9403>         &  1.  ProdO3 & CH3SO2 = SO2 + CH3O2 : 
%%  <G9404>         &  1.  LossO3 & CH3SO2 + O3 = CH3SO3 : 
%%  <G9701>         &  1.  LossO3 & DMS + BrO = DMSO + Br : 
%%  <G10100>        &  1.  LossO3 & Hg + O3 = HgO + O2 : 
%%  <G10703>        &  1.  LossO3 & Hg + BrO = HgO + Br : 
%%  <G10704>        &  1.  LossO3 & HgBr + BrO = BrHgOBr : 
%%  <G10705>        &  1.  LossO3 & HgCl + BrO = ClHgOBr : 
%%  <J0001>         &  1.  LossO3 & O3P = Op + 2 em : 
%%  <J0002b>        &  1.  ProdO3 & O2 = Op + O3P + em : 
%%  <J1000a>        &  2.  ProdO3 & O2 + hv = O3P + O3P : 
%%  <J1000b>        &  2.  ProdO3 & O2 + hv = O3P + O1D : 
%%  <J1000d>        &  1.  ProdO3 & O2 + hv = Op + O3P : 
%%  <J1002>         &  1.  LossO3 & O3P + hv = Op : 
%%  <J2100b>        &  1.  ProdO3 & H2O + hv = H2 + O1D : 
%%  <J3100>         &  1.  ProdO3 & N2O + hv = O1D + N2 : 
%%  <J3102a>        &  1.  ProdO3 & NO + hv = N + O3P : 
%%  <J3103b>        &  2.  LossO3 & NO3 + hv = NO + O2 : 
%%  <J3202>         &  0.333  ProdO3 & HNO4 + hv = .667 NO2 + .667 HO2 + .333 NO3 + .333 OH : 
%%  <J4102>         &  1.  ProdO3 & CO2 + hv = CO + O3P : 
%%  <J6100>         &  2.  LossO3 & Cl2O2 + hv = 2 Cl : 
%%  <J6101>         &  1.  ProdO3 & OClO + hv = ClO + O3P : 
%%  <J6201>         &  1.  LossO3 & HOCl + hv = OH + Cl : 
%%  <J6300>         &  1.  ProdO3 & ClNO2 + hv = Cl + NO2 : 
%%  <J7200>         &  1.  LossO3 & HOBr + hv = Br + OH : 
%%  <J7300>         &  1.  ProdO3 & BrNO2 + hv = Br + NO2 : 
%%  <J8100>         &  1.  ProdO3 & IO + hv = I + O3P : 
%%  <J8300>         &  1.  ProdO3 & INO2 + hv = I + NO2 : 
%%  <J8301>         &  2.  ProdO3 & INO3 + hv = I + NO3 : 
%%  <HET200>        &  1.  LossO3 & N2O5 + H2O = 2 HNO3 : 
%%  <HET201>        &  3.  LossO3 & N2O5 = 2 NO3m_cs + 2 Hp_cs : 
%%  <HET410>        &  1.  LossO3 & HOCl + HCl = Cl2 + H2O : 
%%  <HET420>        &  1.  LossO3 & ClNO3 + HCl = Cl2 + HNO3 : 
%%  <HET422>        &  2.  LossO3 & N2O5 + HCl = ClNO2 + HNO3 : 
%%  <HET510>        &  1.  LossO3 & HOBr + HBr = Br2 + H2O : 
%%  <HET540>        &  1.  LossO3 & ClNO3 + HBr = BrCl + HNO3 : 
%%  <HET541>        &  1.  LossO3 & BrNO3 + HCl = BrCl + HNO3 : 
%%  <HET542>        &  1.  LossO3 & HOCl + HBr = BrCl + H2O : 
%%  <HET543>        &  1.  LossO3 & HOBr + HCl = BrCl + H2O : 
%%  <G9100>         &  2.  ProdO3 & SO + O2 = SO2 + O3P : 
%%  <G9102>         &  1.  ProdO3 & S + O2 = SO + O3P : 
%%  <G9407>         &  1.  LossO3 & OCS + O3P = CO + SO : 
%% %
%
%% %mz_pj_20080320+
%% % 'old' O3 budget diagnostic from Joeckel et al., (2006)
%% <G2107> & LossHO2        & HO2  + O3       = OH
%% <G2104> & LossOH         & OH   + O3       = HO2
%% <G2111> & LossO1D        & H2O  + O1D      = 2 OH 
%% <G3201> & ProdHO2        & NO   + HO2      = NO2   + OH
%% <G4104> & ProdMeO2       & CH3O2 + NO      = HCHO + NO2 + HO2
%% <G4204> & ProdRO2        & C2H5O2  + NO      = CH3CHO + HO2 + NO2
%% <G4212> & ProdRO2        & CH3CO3    + NO      = CH3O2 + NO2
%% %<G4305> & 0.96 ProdRO2   & IC3H7O2  + NO      = .96 CH3COCH3 + .96 HO2 + .96 NO2 + .04 IC3H7NO3  
%% %<G4309> & 0.98 ProdRO2   & LHOC3H6O2 + NO     = .98 CH3CHO + .98 HCHO + .98 HO2 + .98 NO2 + .02 LC4H9NO3 
%% <G4305> & ProdRO2   & IC3H7O2  + NO      = .96 CH3COCH3 + .96 HO2 + .96 NO2 + .04 IC3H7NO3          %op_vg_20130123
%% <G4305a> & ProdRO2   & IC3H7O2 + NO      = CH3COCH3 + HO2 + NO2 : % op_pj_20141104
%% <G4305b> & ProdRO2   & IC3H7O2 + NO      = IC3H7NO3             : % op_pj_20141104
%% <G4309> & ProdRO2   & LHOC3H6O2 + NO     = .98 CH3CHO + .98 HCHO + .98 HO2 + .98 NO2 + .02 LC4H9NO3 %op_vg_20130123
%% <G4309a> & ProdRO2       & LHOC3H6O2  + NO      = CH3CHO + HCHO + HO2 + NO2 : % op_pj_20141104
%% <G4309b> & 0.75 ProdRO2  & LHOC3H6O2  + NO  = .75 LC4H9NO3              : % op_pj_20141104
%% <G4313> & ProdRO2        & CH3COCH2O2  + NO    = NO2 + CH3CO3 + HCHO
%% <G4403> & ProdRO2        & LC4H9O2  + NO    = .84 NO2 + .56 MEK + .56 HO2 + .28 C2H5O2 + .84 CH3CHO + .16 LC4H9NO3
%% <G4403a> & ProdRO2       & LC4H9O2  + NO = NO2 + .667 MEK + .667 HO2 + .333 C2H5O2 + .333 CH3CHO : % op_pj_20141104
%% <G4403b> & ProdRO2       & LC4H9O2  + NO = LC4H9NO3 : % op_pj_20141104
%% <G4408> & ProdRO2        & MVKO2   + NO    = NO2 + .25 CH3CO3 + .25 ACETOL + .75 HCHO + .25 CO + .75 HO2 + .5 MGLYOX
%% %<G4415> & 0.985 ProdRO2  & LMEKO2   + NO    = .985 CH3CHO + .985 CH3CO3 + .985 NO2 + .015 LC4H9NO3  
%% %<G4504> & 0.956 ProdRO2 & ISO2  + NO      = .956 NO2 + .956 MVK + .956 HCHO + .956 HO2 + .044 ISON 
%% <G4415> & ProdRO2  & LMEKO2   + NO    = .985 CH3CHO + .985 CH3CO3 + .985 NO2 + .015 LC4H9NO3         %op_vg_20130123
%% <G4504> & ProdRO2 & ISO2  + NO      = .956 NO2 + .956 MVK + .956 HCHO + .956 HO2 + .044 ISON        %op_vg_20130123
%% <G4504b> & ProdRO2 & ISO2  + NO      = NO2 + MVK + HCHO + HO2  : % op_pj_20141104
%% <G4504c> & ProdRO2 & ISO2  + NO      = ISON                    : % op_pj_20141104
%% %mz_pj_20080320-
%
%% % op_vg_20100630+
%% % Ozone loss via O-Family
%% % Extension of Crutzen and Schmailzl, 1983
%% % ODD =     O + O1D + O3 
%% %       + ClO + ClOH +  Cl2O2
%% %       + NO2 + HNO3 + 2 NO3 + 3 N2O5 + HNO4
%% %       + PAN + NACA 
%% %       + 2 ClONO2 + HO2NO2
%% %       + BrO + HOBr + 2 BrONO2
%% <G1002a> &  2.0 LossO3O  & O3   + O1D      = 2 O2
%% <G1003>  &  2.0 LossO3O  & O3   + O3P      = 2 O2
%% <G2111>  &      LossO3O  & H2O  + O1D      = 2 OH
%% <G3102a> &      LossO3O  & N2O  + O1D      = 2 NO
%% <G3102aa> &     LossO3O  &                           % op_pj_20100723
%% <G3102b> &      LossO3O  & N2O  + O1D      = N2 + O2
%% <G3102bb> &     LossO3O  &                           % op_pj_20100723
%% %#
%% % Ozone loss via H-Family
%% <G2101>  &     LossO3H  & H    + O3       = OH
%% <G2102>  &     LossO3H  & H2   + O1D      = H + OH
%% <G2103>  &     LossO3H  & OH   + O3P      = H
%% <G2104>  &     LossO3H  & OH   + O3       = HO2
%% <G2106>  &     LossO3H  & HO2  + O3P      = OH
%% <G2107>  &     LossO3H  & HO2  + O3       = OH
%% <G2108c> &     LossO3Hn  & HO2  + H        = O3P + H2O
%% % Ozone loss via N-Family
%% <G3100>  &      LossO3Nn  & N    + O2       = NO + O3P
%% <G3104>  &      LossO3Nn  & NO   + N        = O3P + N2
%% <G3105>  &  2.0 LossO3N  & NO2  + O3P      = NO + O2
%% <G3204>  &      LossO3N  & NO3  + HO2      = NO2 + OH + O2
%% <G3205>  &      LossO3Nn  & HONO + OH       = NO2 + H2O
%% <G3206>  &      LossO3Nn  & HNO3 + OH       = H2O   + NO3
%% <G6300>  &      LossO3Nn  & ClO   + NO      = NO2 + Cl
%% <G7301>  &      LossO3Nn  & BrO  + NO       = Br  + NO2
%% <G4105>  &      LossO3N  & CH3O2   + NO3   = HCHO + HO2 + NO2
%% <G4109>  &      LossO3N  & HCHO    + NO3   = HNO3 + CO + HO2
%% <G4209>  &      LossO3N  & CH3CHO  + NO3   = CH3CO3 + HNO3
%% <G4214>  &      LossO3N  & CH3CO3  + NO3   = CH3O2 + NO2
%% <HET200> &      LossO3N  &    N2O5 + H2O  = HNO3 + HNO3
%% <J3103b> &  2.0 LossO3N  & NO3     + hv    = NO
%% <G3105>  &  2.0 LossO3N2 & NO2  + O3P      = NO + O2
%% % Ozone loss via R-Family
%% <G4201>  &      LossO3R  & C2H4    + O3      = HCHO + .22 HO2 + .12 OH + .23 CO + .54 HCOOH + .1 H2
%% <G4301>  &      LossO3R  & C3H6    + O3      = .57 HCHO + .47 CH3CHO + .33 OH + .26 HO2 + .07 CH3O2 + .06 C2H5O2 + .23 CH3CO3 + .04 CH3COCHO + .06 CH4 + .31 CO + .22 HCOOH + .03 CH3OH
%% <G4405>  &      LossO3R  & MVK     + O3      = .45 HCOOH + .9 CH3COCHO + .1 CH3CO3 + .19 OH + .22 CO + .32 HO2
%% <G4500>  &      LossO3R  & C5H8  + O3        = .28 HCOOH + .65 MVK + .1 MVKO2  + .1 CH3CO3 + .14 CO + .58 HCHO + .09 H2O2 + .08 CH3O2 + .25 OH + .25 HO2
%% %
%% % Ozone loss via Cl-Family
%% %
%% <G6101>  &  2.0 LossO3Cl & ClO + O3P       = Cl
%% <G6201b> &      LossO3Cln & Cl + HO2        = ClO + OH
%% <G6203>  &      LossO3Cl & ClO + OH        = Cl  + HO2
%% <G6203a> &      LossO3Cl & ClO + OH        = Cl  + HO2
%% <G6203b> &      LossO3Cl & ClO + OH        = HCl
%% <G6300>  &  1.0 LossO3Cl & ClO   + NO       = NO2 + Cl
%% <G6403>  &      LossO3Cl & ClO     + CH3O2  = HO2 + Cl + HCHO 
%% <G6405>  &      LossO3Cl & CH3Cl   + O1D    = OH + Cl {+...>
%% <G6405a> &      LossO3Cl &                                 % op_pj_20100723
%% %<G6405b> &      LossO3Cl &                                 % op_pj_20100723
%% <G6407>  &      LossO3Cl & CH3CCl3 + O1D    = OH + 3 Cl {+...>
%% <G6407a> &      LossO3Cl &                                 % op_pj_20100723
%% %<G6407b> &      LossO3Cl &                                 % op_pj_20100723
%% <G7603b> &      LossO3Cl & BrO  + ClO      = Br   + Cl
%% <G7603c> &      LossO3Cl & BrO  + ClO      = BrCl
%% <J6201>  &      LossO3Cl & HOCl    + hv = OH + Cl 
%% <HET410> &      LossO3Cl & HOCl  + HCl = Cl2 + H2O
%% <HET420> &      LossO3Cl & ClNO3 + HCl = Cl2 + HNO3 
%% <HET540> &      LossO3Cl & ClNO3 + HBr = BrCl + HNO3
%% <HET542> &      LossO3Cl & HOCl  + HBr = BrCl + H2O 
%% % Ozone loss via Br-Family
%% <G7101>  &  2.0 LossO3Br & BrO  + O3P      = Br + O2
%% <G7102a> &  2.0 LossO3Br & BrO  + BrO      = Br + Br
%% <G7102b> &  2.0 LossO3Br & BrO  + BrO      = Br2
%% <G7203>  &      LossO3Br & HOBr + O3P      = OH  + BrO
%% <G7301>  &      LossO3Br & BrO  + NO       = Br  + NO2
%% <G7402b> &      LossO3Br & BrO  + CH3O2    = Br + HCHO + HO2
%% <G7603b> &      LossO3Br & BrO  + ClO      = Br   + Cl
%% <G7603c> &      LossO3Br & BrO  + ClO      = BrCl
%% <J7200>  &      LossO3Br & HOBr + hv = Br + OH 
%% <HET510> &      LossO3Br & HOBr  + HBr = Br2 + H2O
%% <HET541> &      LossO3Br & BrNO3 + HCl = BrCl + HNO3
%% <HET543> &      LossO3Br & HOBr  + HCl = BrCl + H2O 
%% %
%% % op_vg_20100630-
%% %
%% % op_pg_20130122+
%% %budget analysis for short-lived halogens L=long-lived S=short-lived
%% %
%% %Cl
%% <G6404>       &  4.0  ProdLCl & CCl4 + O1D = ClO + 3 Cl :
%% <G6405>       &  1.0  ProdLCl & CH3Cl + O1D = OH + Cl :
%% <G6406>       &  1.0  ProdLCl & CH3Cl + OH  = H2O + Cl :
%% <G6407>       &  3.0  ProdLCl & CH3CCl3 + O1D = OH + 3 Cl :
%% <G6408>       &  3.0  ProdLCl & CH3CCl3 + OH  = H2O + 3 Cl :
%% <G6500>       &  2.0  ProdLCl & CF2Cl2 + O1D = ClO + Cl :
%% <G6501>       &  3.0  ProdLCl & CFCl3 + O1D = ClO + 2 Cl :
%% %
%% %Br
%% <G7403>        &  1.0  ProdLBr & CH3Br + OH = H2O + Br :
%% <G7407>        &  3.0  ProdSBr & CHBr3 + OH = H2O + 3 Br :
%% <G7408>        &  2.0  ProdSBr & CH2Br2 + OH = H2O + 2 Br :
%% %
%% %------------ no Cl-Production ----
%% <G7605>        &  1.0  ProdSBr & CHCl2Br + OH = H2O + Br :
%% <G7606>        &  2.0  ProdSBr & CHClBr2 + OH = H2O + 2 Br :
%% <G7607>        &  1.0  ProdSBr & CH2ClBr + OH = H2O + Br :
%% %------------                    ----
%% %
%% %Photolysis
%% %
%% %Cl
%% <J6400>        &  1.0  ProdLCl & CH3Cl + hv = Cl + CH3O2 :
%% <J6401>        &  4.0  ProdLCl & CCl4  + hv = 4 Cl  :
%% <J6402>        &  3.0  ProdLCl & CH3CCl3 + hv = 3 Cl :
%% <J6500>        &  3.0  ProdLCl & CFCl3 + hv = 3 Cl :
%% <J6501>        &  2.0  ProdLCl & CF2Cl2 + hv = 2 Cl :
%% %
%% %Br
%% <J7400>        &  1.0  ProdLBr & CH3Br + hv = Br + CH3O2 :
%% <J7401>        &  2.0  ProdSBr & CH2Br2 + hv = 2 Br :
%% <J7402>        &  3.0  ProdSBr & CHBr3 + hv = 3 Br :
%% <J7500>        &  1.0  ProdLBr & CF3Br + hv = Br :
%% %
%% %---Cl+Br
%% <J7601>        &  1.0  ProdLBr + 1.0 ProdLCl & CF2ClBr + hv = Br + Cl :
%% <J7602>        &  1.0  ProdSBr + 1.0 ProdSCl & CH2ClBr + hv = Br + Cl :
%% <J7603>        &  1.0  ProdSBr + 2.0 ProdSCl & CHCl2Br + hv = Br + 2 Cl :
%% <J7604>        &  2.0  ProdSBr + 1.0 ProdSCl & CHClBr2 + hv = 2 Br + Cl :
%% %
%% %I J8401 I-Production?
%% %
%% %op_pg_20130122-
%% %
%% % op_kg_20110601+
%% % diagnose HO2+NO
%% <G3201>    & 1.0  LossG3201    & NO + HO2 = NO2 + OH
%% % HO2+NO for Butkovskaya_dry.rpl
%% <G3201a>   & 1.0  LossG3201a   & NO + HO2 = NO2 + OH
%% <G3201aKG> & 1.0  LossG3201aKG & NO + HO2 = HNO3
%% % diagnose HO2+NO for Butkovskaya_wet.rpl
%% <G3201b>   & 1.0  LossG3201b   & NO + HO2 = NO2 + OH
%% <G3201bKG> & 1.0  LossG3201bKG & NO + HO2 = HNO3
%% % op_kg_20110601-
%% % op_kg_20111109+
%% % diagnose HOx, NOx for selected reactions individually (for studying HO2+NO=HNO3)
%% <G2104>    & 1.0  LossG2104    & OH + O3 = HO2
%% <G2106>    & 1.0  LossG2106    & HO2 + O3P = OH
%% <G2107>    & 1.0  LossG2107    & HO2 + O3 = OH
%% <G2110>    & 1.0  LossG2110    & HO2 + HO2 = H2O2
%% <G3103>    & 1.0  LossG3103    & NO + O3 = NO2 + O2
%% <G3105>    & 1.0  LossG3105    & NO2 + O3P = NO + O2
%% <G3106>    & 1.0  LossG3106    & NO2 + O3 = NO3 + O2
%% <G3202>    & 1.0  LossG3202    & NO2 + OH = HNO3
%% <G4110>    & 1.0  LossG4110    & CO + OH = H + CO2
%% <J3101>    & 1.0  LossJ3101    & NO2 + hv = NO + O
%% <J3103a>   & 1.0  LossJ3103a   & NO3 + hv = NO2 + O3P
%% % op_kg_20111109-
% op_vg_20140326+
 % manually changed by C. Froemming (16.05.2011) 
 % Automatically generated Prod and loss terms for the familly defined below
 % Used program: prodloss.f90 (V. Grewe)
 % Input: equationfile mecca_gas_mim1.eqn
 % Family: O3 = 
 %                   1.  x O3
 %                +  1.  x O3P
 %                +  1.  x O1D
 %                +  1.  x ClO
 %                +  1.  x HOCl
 %                +  2.  x Cl2O2
 %                +  1.  x OClO
 %                +  1.  x NO2
 %                +  1.  x HNO3
 %                +  2.  x NO3
 %                +  3.  x N2O5
 %                +  1.  x HNO4
 %                +  1.  x PAN
 %                +  1.  x NACA
 %                +  1.  x MPAN
 %                +  1.  x IC3H7NO3
 %                +  1.  x LC4H9NO3
 %                +  1.  x ISON
 %                +  2.  x ClNO3
 %                +  1.  x BrO
 %                +  1.  x HOBr
 %                +  2.  x BrNO3
 % airtrac O3 loss via N
 <G3105>         &  2.  LossO3N & NO2 + O3P = NO + O2 :
 % airtrac O3 loss via all other reactions
 <G1002>         &  2.  LossO3Y & O3 + O1D = 2 O2 : 
 <G1003>         &  2.  LossO3Y & O3 + O3P = 2 O2 : 
 <G2101>         &  1.  LossO3Y & H + O3 = OH + O2 : 
 <G2102>         &  1.  LossO3Y & H2 + O1D = H + OH : 
 <G2103>         &  1.  LossO3Y & OH + O3P = H + O2 : 
 <G2104>         &  1.  LossO3Y & OH + O3 = HO2 + O2 : 
 <G2106>         &  1.  LossO3Y & HO2 + O3P = OH + O2 : 
 <G2107>         &  1.  LossO3Y & HO2 + O3 = OH + 2 O2 : 
 <G2111>         &  1.  LossO3Y & H2O + O1D = 2 OH : 
 <G3102a>        &  1.  LossO3Y & N2O + O1D = 2 NO : 
 <G3102b>        &  1.  LossO3Y & N2O + O1D = N2 + O2 : 
 <G3204>         &  1.  LossO3Y & NO3 + HO2 = NO2 + OH + O2 : 
 <G3210>         &  1.  LossO3Y & NH2 + O3 = NH2O + O2 : 
 <G3215>         &  1.  LossO3Y & NH2 + NO2 = N2O + H2O : 
 <G3216>         &  1.  LossO3Y & NH2 + NO2 = NH2O + NO : 
 <G3217>         &  1.  LossO3Y & NH2O + O3 = NH2 + O2 : 
 <G3221>         &  1.  LossO3Y & HNO + NO2 = HONO + NO : 
 <G4100>         &  1.  LossO3Y & CH4 + O1D = .75 CH3O2 + .75 OH + .25 HCHO + .4 H + .05 H2 : 
 <G4105>         &  1.  LossO3Y & CH3O2 + NO3 = HCHO + HO2 + NO2 : 
 <G4109>         &  1.  LossO3Y & HCHO + NO3 = HNO3 + CO + HO2 : 
 <G4201>         &  1.  LossO3Y & C2H4 + O3 = HCHO + .22 HO2 + .12 OH + .23 CO + .54 HCOOH + .1 H2 : 
 <G4205>         &  1.  LossO3Y & C2H5O2 + NO3 = CH3CHO + HO2 + NO2 : 
 <G4209>         &  1.  LossO3Y & CH3CHO + NO3 = CH3CO3 + HNO3 : 
 <G4214>         &  1.  LossO3Y & CH3CO3 + NO3 = CH3O2 + NO2 : 
 <G4303>         &  1.  LossO3Y & C3H6 + NO3 = LC4H9NO3 : 
 <G4405>         &  1.  LossO3Y & MVK + O3 = .45 HCOOH + .9 MGLYOX + .1 CH3CO3 + .19 OH + .22 CO + .32 HO2 : 
 <G4502>         &  1.  LossO3Y & C5H8 + NO3 = ISON : 
 <G6101>         &  2.  LossO3Y & ClO + O3P = Cl + O2 : 
 <G6102a>        &  2.  LossO3Y & ClO + ClO = Cl2 + O2 : 
 <G6102b>        &  2.  LossO3Y & ClO + ClO = 2 Cl + O2 : 
 <G6102c>        &  1.  LossO3Y & ClO + ClO = Cl + OClO : 
 <G6203>         &  1.  LossO3Y & ClO + OH = .94 Cl + .94 HO2 + .06 HCl + .06 O2 : 
 <G6403>         &  1.  LossO3Y & ClO + CH3O2 = HO2 + Cl + HCHO : 
 <G6405>         &  1.  LossO3Y & CH3Cl + O1D = OH + Cl {+...} : 
 <G6407>         &  1.  LossO3Y & CH3CCl3 + O1D = OH + 3 Cl {+...} : 
 <G7101>         &  2.  LossO3Y & BrO + O3P = Br + O2 : 
 <G7102a>        &  2.  LossO3Y & BrO + BrO = 2 Br + O2 : 
 <G7102b>        &  2.  LossO3Y & BrO + BrO = Br2 + O2 : 
 <G7203>         &  1.  LossO3Y & HOBr + O3P = OH + BrO : 
 <G7402b>        &  1.  LossO3Y & BrO + CH3O2 = Br + HCHO + HO2: 
 <G7603a>        &  1.  LossO3Y & BrO + ClO = Br + OClO : 
 <G7603b>        &  2.  LossO3Y & BrO + ClO = Br + Cl + O2 : 
 <G7603c>        &  2.  LossO3Y & BrO + ClO = BrCl + O2 : 
 <G8100>         &  1.  LossO3Y & I + O3 = IO + O2 : 
 <G8300>         &  1.  LossO3Y & I + NO2 {+M} = INO2 : 
 <G8301>         &  1.  LossO3Y & I + NO3 = IO + NO2 : 
 <G8303>         &  1.  LossO3Y & IO + NO2 {+M} = INO3 : 
 <G8307>         &  2.  LossO3Y & I2 + NO3 = I + INO3 : 
 <G8308>         &  1.  LossO3Y & IO + NO3 = OIO + NO2 : 
 <G8402>         &  1.  LossO3Y & CH3I + NO3 {+O2} = HNO3 + HCHO + IO : 
 <G8600>         &  0.45  LossO3Y & IO + ClO = .2 ICl + .25 Cl + .55 OClO + .8 I + .45 O2 : 
 <G8700>         &  1.  LossO3Y & I + BrO = IO + Br : 
 <G8701>         &  1.  LossO3Y & IO + BrO = Br + .8 OIO + .2 I + .2 O2 : 
 <G9401>         &  1.  LossO3Y & DMS + NO3 = CH3SO2 + HNO3 + HCHO {-O3}: 
 <G9404>         &  1.  LossO3Y & CH3SO2 + O3 = CH3SO3 : 
 <G9701>         &  1.  LossO3Y & DMS + BrO = DMSO + Br : 
 <G10100>        &  1.  LossO3Y & Hg + O3 = HgO + O2 : 
 <G10703>        &  1.  LossO3Y & Hg + BrO = HgO + Br : 
 <G10704>        &  1.  LossO3Y & HgBr + BrO = BrHgOBr : 
 <G10705>        &  1.  LossO3Y & HgCl + BrO = ClHgOBr : 
 <J3103b>        &  2.  LossO3Y & NO3 + hv = NO : 
 <J6100>         &  2.  LossO3Y & Cl2O2 + hv = 2 Cl : 
 <J6201>         &  1.  LossO3Y & HOCl + hv = OH + Cl : 
 <J7200>         &  1.  LossO3Y & HOBr + hv = Br + OH : 
 <J7301>         &  1.1920929E-7  LossO3Y & BrNO3 + hv = 0.29 Br + 0.29 NO3 + 0.71 BrO + 0.71 NO2 : 
 <HET200>        &  1.  LossO3Y & N2O5 + H2O = 2 HNO3 : 
 <HET201>        &  3.  LossO3Y & N2O5 = 2 NO3m_cs + 2 Hp_cs : 
 <HET410>        &  1.  LossO3Y & HOCl + HCl = Cl2 + H2O : 
 <HET420>        &  1.  LossO3Y & ClNO3 + HCl = Cl2 + HNO3 : 
 <HET422>        &  2.  LossO3Y & N2O5 + HCl = ClNO2 + HNO3 : 
 <HET510>        &  1.  LossO3Y & HOBr + HBr = Br2 + H2O : 
 <HET540>        &  1.  LossO3Y & ClNO3 + HBr = BrCl + HNO3 : 
 <HET541>        &  1.  LossO3Y & BrNO3 + HCl = BrCl + HNO3 : 
 <HET542>        &  1.  LossO3Y & HOCl + HBr = BrCl + H2O : 
 <HET543>        &  1.  LossO3Y & HOBr + HCl = BrCl + H2O : 
 % airtrac O3 production 
 % op_sb_20140326: remove ProdO3 terms 
 % <G2108c>        &  1.  ProdO3  & HO2 + H = O3P + H2O :
 % <G3100>         &  1.  ProdO3  & N + O2 = NO + O3P :
 % <G3104>         &  1.  ProdO3  & NO + N = O3P + N2 :
 <G3201>         &  1.  ProdO3N & NO + HO2 = NO2 + OH :
 % <G3205>         &  1.  ProdO3  & HONO + OH = NO2 + H2O :
 % <G3206>         &  1.  ProdO3  & HNO3 + OH = H2O + NO3 :
 <G4104>         &  1.  ProdO3N & CH3O2 + NO = HCHO + NO2 + HO2 :
 <G4204>         &  1.  ProdO3N & C2H5O2 + NO = CH3CHO + HO2 + NO2 :
 % <G4211b>        &  1.  ProdO3  & CH3CO3 + HO2 = CH3CO2H + O3 :
 <G4212>         &  1.  ProdO3N & CH3CO3 + NO = CH3O2 + NO2 :
 <G4305>         &  1.  ProdO3N & IC3H7O2 + NO = .96 CH3COCH3 + .96 HO2 + .96 NO2 + .04 IC3H7NO3 :
 <G4305a>        &  1.  ProdO3N & IC3H7O2 + NO = CH3COCH3 + HO2 + NO2 : % op_pj_20141104
 <G4305b>        &  1.  ProdO3N & IC3H7O2 + NO = IC3H7NO3 : % op_pj_20141104
 <G4309>         &  1.  ProdO3N & LHOC3H6O2 + NO = .98 CH3CHO + .98 HCHO + .98 HO2 + .98 NO2 + .02 LC4H9NO3 :
 <G4309a>        &  1.  ProdO3N &  LHOC3H6O2  + NO      = CH3CHO + HCHO + HO2 + NO2 : % op_pj_20141104
 <G4309b>        &  0.75. ProdO3N &  LHOC3H6O2  + NO      = .75 LC4H9NO3 : % op_pj_20141104
 <G4313>         &  1.  ProdO3N & CH3COCH2O2 + NO = NO2 + CH3CO3 + HCHO :
 <G4403>         &  1.  ProdO3N & LC4H9O2 + NO = .84 NO2 + .56 MEK + .56 HO2 + .28 C2H5O2 + .28 CH3CHO + .16 LC4H9NO3 :
 <G4403a>        &  1.  ProdO3N & LC4H9O2 + NO = NO2 + .667 MEK + .667 HO2 + .333 C2H5O2 + .333 CH3CHO : % op_pj_20141104
 <G4403b>        &  1.  ProdO3N & LC4H9O2 + NO = LC4H9NO3 :% op_pj_20141104
 <G4408>         &  1.  ProdO3N & MVKO2 + NO = NO2 + .25 CH3CO3 + .25 ACETOL + .75 HCHO + .25 CO + .75 HO2 + .5 MGLYOX :
 <G4415>         &  1.  ProdO3N & LMEKO2 + NO = .985 CH3CHO + .985 CH3CO3 + .985 NO2 + .015 LC4H9NO3 :
 <G4504>         &  1.  ProdO3N & ISO2 + NO = .956 NO2 + .956 MVK + .956 HCHO + .956 HO2 + .044 ISON :
 <G4504b>        &  1.  ProdO3N & ISO2 + NO = NO2 + MVK + HCHO + HO2      : % op_pj_20141104
 <G4504c>        &  1.  ProdO3N & ISO2 + NO = ISON                        : % op_pj_20141104
 % <G6201b>        &  1.  ProdO3  & Cl + HO2 = ClO + OH :
 % <G7204>         &  1.  ProdO3  & Br2 + OH = HOBr + Br :
 % <G8302>         &  1.  ProdO3  & IO + NO = I + NO2 :
 % <G8304>         &  1.  ProdO3  & OIO + NO = NO2 + IO :
 % <G8305>         &  1.  ProdO3  & INO2 = I + NO2 :
 % <G8306>         &  1.  ProdO3  & INO3 = IO + NO2 :
 % <J1000>         &  2.  ProdO3  & O2 + hv = O3P + O3P :
 % <J3100>         &  1.  ProdO3  & N2O + hv = O1D :
 % <J3102>         &  1.  ProdO3  & NO + hv = N + O3P :
 % <J3202>         &  0.333  ProdO3 & HNO4 + hv = .667 NO2 + .667 HO2 + .333 NO3 + .333 OH :
 <J4204>         &  0.40000004  ProdO3 & PAN + hv = .6 CH3CO3 + .6 NO2 + .4 CH3O2 + .4 NO3 + .4 CO2 :
 % <J4102>         &  1.  ProdO3  & CO2 + hv = CO + O3P :
 % <J6101>         &  1.  ProdO3  & OClO + hv = ClO + O3P :
 % <J6300>         &  1.  ProdO3  & ClNO2 + hv = Cl + NO2 :
 <J7300>         &  1.  ProdO3Y & BrNO2 + hv = Br + NO2 :
 <J8100>         &  1.  ProdO3Y & IO + hv = I + O3P :
 <J8300>         &  1.  ProdO3Y & INO2 + hv = I + NO2 :
 <J8301>         &  2.  ProdO3Y & INO3 + hv = I + NO3 :
% op_cf_20110419+
%% NOx loss through HNO3 formation
 <G3202>	 &  1.  LossNOx	& NO2  + OH    	= HNO3 :
% op_cf_20110419-
% op_cf_20111006+
%% HNO3 loss
 <G3206>	 &  1. LossHNO3	& HNO3 + OH    	= H2O   + NO3 :
 <J3201>  	 &  1. LossHNO3 & HNO3 + hv 	= NO2 + OH :
% op_cf_20111006-
% op_vg_20110915+
% OH chemistry
 <G2111>         &  2.  ProdOH1 & H2O + O1D = 2 OH :
 <G2107>         &  1.  ProdOH2 & HO2 + O3 = OH + 2 O2 :
 <G3201>         &  1.  ProdOH3 & NO + HO2 = NO2 + OH :
 <G2104>         &  1.  LossOH1 & OH + O3 = HO2 + O2 :
 <G4110>         &  1.  LossOH2 & CO + OH = H + CO2 :
 <G4200>         &  1.  LossOH3 & C2H6 + OH = C2H5O2 + H2O :
 <G4202>         &  1.  LossOH3 & C2H4 + OH {+M} = .6666667 LHOC3H6O2 :
 <G4208>         &  1.  LossOH3 & CH3CHO + OH = CH3CO3 + H2O :
 <G4210>         &  1.  LossOH3 & CH3CO2H + OH = CH3O2 :
 <G4218>         &  1.  LossOH3 & CH3CO3H + OH = CH3CO3 :
 <G4300>         &  1.  LossOH3 & C3H8 + OH = .82 IC3H7O2 + .18 C2H5O2 + H2O :
 <G4302>         &  1.  LossOH3 & C3H6 + OH {+M} = LHOC3H6O2 :
 <G4311>         &  1.  LossOH3 & CH3COCH3 + OH = CH3COCH2O2 + H2O :
 <G4400>         &  1.  LossOH3 & NC4H10 + OH = LC4H9O2 + H2O :
 <G4501>         &  1.  LossOH3 & C5H8 + OH = ISO2 :
 <G4508>         &  1.  LossOH3 & ISON + OH = ACETOL + NACA :
 <G4101>         &  1.  LossOH4 & CH4 + OH = CH3O2 + H2O :
 <G2109>         &  1.  LossOH5 & HO2 + OH = H2O :
 <G4104>         &  1.  ProdHO21 & CH3O2 + NO = HCHO + NO2 + HO2 :
 <G4204>         &  1.  ProdHO21 & C2H5O2 + NO = CH3CHO + HO2 + NO2 :
 <G4305>         &  0.96  ProdHO21 & IC3H7O2 + NO = .96 CH3COCH3 + .96 HO2 + .96 NO2 + .04 IC3H7NO3 :
 <G4305a>        &  1.  ProdHO21   & IC3H7O2 + NO = CH3COCH3 + HO2 + NO2 : % op_pj_20141104
 <G4305b>        &  1.  ProdHO21   & IC3H7O2 + NO = IC3H7NO3 : % op_pj_20141104
 <G4309>         &  0.98  ProdHO21 & LHOC3H6O2 + NO = .98 CH3CHO + .98 HCHO + .98 HO2 + .98 NO2 + .02 LC4H9NO3 :
 <G4309a>        &  1.   ProdHO21 & LHOC3H6O2  + NO = CH3CHO + HCHO + HO2 + NO2  : % op_pj_20141104
 <G4309b>        &  0.75 ProdHO21 &  LHOC3H6O2 + NO = .75 LC4H9NO3 : % op_pj_20141104
 <G4403>         &  0.56  ProdHO21 & LC4H9O2 + NO = .84 NO2 + .56 MEK + .56 HO2 + .28 C2H5O2 + .28 CH3CHO + .16 LC4H9NO3 :
 <G4403a>        &  0.667 ProdHO21 & LC4H9O2 + NO = NO2 + .667 MEK + .667 HO2 + .333 C2H5O2 + .333 CH3CHO : % op_pj_20141104
 <G4403b>        &  1.0   ProdHO21 & LC4H9O2 + NO = LC4H9NO3 : % op_pj_20141104
 <G4408>         &  0.75  ProdHO21 & MVKO2 + NO = NO2 + .25 CH3CO3 + .25 ACETOL + .75 HCHO + .25 CO + .75 HO2 + .5 MGLYOX :
 <G4504>         &  0.956 ProdHO21 & ISO2 + NO = .956 NO2 + .956 MVK + .956 HCHO + .956 HO2 + .044 ISON : % op_pj_20111204
 <G4504b>        &  1.  ProdHO21 & ISO2 + NO  = NO2 + MVK + HCHO + HO2 : % op_pj_20141104
 <G4504c>        &  1.  ProdHO21 & ISO2 + NO  = ISON                   : % op_pj_20141104
 <G4103a>        &  1.  LossHO21 & CH3O2 + HO2 = CH3OOH :
 <G4203>         &  1.  LossHO21 & C2H5O2 + HO2 = C2H5OOH :
 <G4211a>        &  1.  LossHO21 & CH3CO3 + HO2 = CH3CO3H :
 <G4211b>        &  1.  LossHO21 & CH3CO3 + HO2 = CH3CO2H + O3 :
 <G4304>         &  1.  LossHO21 & IC3H7O2 + HO2 = IC3H7OOH :
 <G4308>         &  1.  LossHO21 & LHOC3H6O2 + HO2 = LHOC3H6OOH :
 <G4312>         &  1.  LossHO21 & CH3COCH2O2 + HO2 = HYPERACET :
 <G4402>         &  1.  LossHO21 & LC4H9O2 + HO2 = LC4H9OOH :
 <G4407>         &  1.  LossHO21 & MVKO2 + HO2 = MVKOOH :
 <G4414>         &  1.  LossHO21 & LMEKO2 + HO2 = LMEKOOH :
 <G4503>         &  1.  LossHO21 & ISO2 + HO2 = ISOOH :
 <G2110>         &  2.  LossHO22 & HO2 + HO2 = H2O2 :
% op_vg_20110915-
% op_vg_20140326-
