# Supplementary material for: Oxidation of low-molecular weight organic compounds in clouddroplets: development of the JAMOC chemical mechanism inCAABA/MECCA (version 4.5.0gmdd)
Source: Copernicus journal article supplement (doi:10.5194/gmd-2020-337), 2020-10-29
Supplement: Supplementary file 20 [file gmd-2020-337-supplement.zip › caaba_4.5.0gmdd/mecca/diagtrac/old/CCMI-base-02-ISO_nmo.tex]

%op_vg_20130123+
% Explanations: 
% - The submodel  o3orig needs effective ozone production and loss terms. These are LossO3 and ProdO3.
% - For diagnostical purpose individual production and loss terms are defined:
%       Troposphere: ProdHO2    Production via NO+HO2
%                    ProdMeO2   Production via NO+CH3O2
%                    ProdRO2    Production via NO+RO2 
%                    LossOH     Ozone loss via O3+OH
%                    LossHO2    Ozone loss via O3+HO2
%                    LossO1D    Ozone loss via H2O+O1D (see Ozone definition below)
%                               = OH Production!
%       Stratosphere: LossO3x  x=O,N,H,Cl,Br Loss processes via Ox, NOx, HOx, ClOx and BrOx ozone desctruction.
% - ProdRO2 has been adapted to fit the ozone definition below.
% - Production terms for BrOx from emitted species according to their ilfetime (VSLS=s and others =l) dignosed
%   (op_pg)
% - rpl file ts2000.rpl considered
% - check that mecca_gas_mim1.eqn (04/2011) and gas_mim1.eqn (01/2013) leads to same diagnostic
%op_vg_20130123-
 % Automatically generated Prod and loss terms for the family defined below
 % Used program: prodloss.f90 (V. Grewe)
 % Input: equationfile mecca.eqn
 % Family: O3 = 
 %                   1.  x O3
 %                +  1.  x O3P
 %                +  1.  x O1D
 %                +  1.  x ClO
 %                +  1.  x HOCl
 %                +  2.  x Cl2O2
 %                +  1.  x OClO
 %                +  1.  x NO2
 %                +  1.  x HNO3
 %                +  2.  x NO3
 %                +  3.  x N2O5
 %                +  1.  x HNO4
 %                +  1.  x PAN
 %                +  1.  x NACA
 %                +  1.  x MPAN
 %                +  1.  x IC3H7NO3
 %                +  1.  x LC4H9NO3
 %                +  1.  x ISON
 %                +  2.  x ClNO3
 %                +  1.  x BrO
 %                +  1.  x HOBr
 %                +  2.  x BrNO3
 %                +  1.  x SO2
 <G1002a>        &  2.  LossO3 & O3 + O1D = 2 O2 : 
 <G1003>         &  2.  LossO3 & O3 + O3P = 2 O2 : 
 <G1004>         &  1.  ProdO3 & O2 + Op = O2p + O3P : 
 <G1101>         &  2.  ProdO3 & O2p + em = 2 O3P : 
 <G2101>         &  1.  LossO3 & H + O3 = OH + O2 : 
 <G2102>         &  1.  LossO3 & H2 + O1D = H + OH : 
 <G2103>         &  1.  LossO3 & OH + O3P = H + O2 : 
 <G2104>         &  1.  LossO3 & OH + O3 = HO2 + O2 : 
 <G2106>         &  1.  LossO3 & HO2 + O3P = OH + O2 : 
 <G2107>         &  1.  LossO3 & HO2 + O3 = OH + 2 O2 : 
 <G2108c>        &  1.  ProdO3 & HO2 + H = O3P + H2O : 
 <G2111>         &  1.  LossO3 & H2O + O1D = 2 OH : 
 <G2113>         &  1.  LossO3 & H2 + O3P = H + OH : 
 <G2114a>        &  1.  ProdO3 & OH + OH = H2O + O3P : 
 <G2116>         &  1.  LossO3 & H2O2 + O3P = OH + HO2 : 
 <G3001>         &  1.  ProdO3 & NOp + em = 0.15 N + 0.85 N2D + O3P : 
 <G3100>         &  1.  ProdO3 & N + O2 = NO + O3P : 
 <G3102a>        &  1.  LossO3 & N2O + O1D = 2 NO : 
 <G3102b>        &  1.  LossO3 & N2O + O1D = N2 + O2 : 
 <G3104>         &  1.  ProdO3 & NO + N = O3P + N2 : 
 <G3105>         &  2.  LossO3 & NO2 + O3P = NO + O2 : 
 <G3111>         &  1.  ProdO3 & N2D + NO = N2 + O3P : 
 <G3112>         &  1.  ProdO3 & N2D + O2 = NO + O3P : 
 <G3114>         &  1.  LossO3 & N2D + O3 = NO + O2 : 
 <G3119>         &  1.  LossO3 & N2p + O3P = NOp + N2D : 
 <G3120a>        &  1.  ProdO3 & Np + O2 = NOp + O3P : 
 <G3121>         &  1.  LossO3 & Np + O3P = Op + N : 
 <G3122>         &  1.  ProdO3 & O2p + N = NOp + O3P : 
 <G3201>         &  1.  ProdO3 & NO + HO2 = NO2 + OH : 
 <G3204>         &  1.  LossO3 & NO3 + HO2 = NO2 + OH + O2 : 
 <G3205>         &  1.  ProdO3 & HONO + OH = NO2 + H2O : 
 <G3206>         &  1.  ProdO3 & HNO3 + OH = H2O + NO3 : 
 <G3210>         &  1.  LossO3 & NH2 + O3 = NH2O + O2 : 
 <G3215>         &  1.  LossO3 & NH2 + NO2 = N2O + H2O : 
 <G3216>         &  1.  LossO3 & NH2 + NO2 = NH2O + NO : 
 <G3217>         &  1.  LossO3 & NH2O + O3 = NH2 + O2 : 
 <G3221>         &  1.  LossO3 & HNO + NO2 = HONO + NO : 
 <G4100>         &  1.  LossO3 & CH4 + O1D = .75 CH3 + .75 OH + .2 CH3O + .2 H + .05 HCHO + .05 H2 : 
 <G4104a>        &  1.  ProdO3 & CH3O2 + NO = CH3O + NO2 : 
 <G4105>         &  1.  LossO3 & CH3O2 + NO3 = CH3O + NO2 + O2 : 
 <G4109>         &  1.  LossO3 & HCHO + NO3 = HNO3 + CO + HO2 : 
 <G4112>         &  1.  LossO3 & CO + O3P = CO2 : 
 <G4113>         &  1.  LossO3 & CH4 + O3P = .51 CH3 + .51 OH + .49 CH3O + .49 H : 
 <G4114>         &  1.  LossO3 & CH3O2 + NO2 = CH3O2NO2 : 
 <G4115>         &  1.  ProdO3 & CH3O2NO2 = CH3O2 + NO2 : 
 <G4116>         &  2.  ProdO3 & CH3O2NO2 + OH = HCHO + NO3 + H2O : 
 <G4117>         &  1.  ProdO3 & CH3NO3 + OH = H2O + HCHO + NO2 : 
 <G4119a>        &  1.  LossO3 & CH3O + NO2 = CH3NO3 : 
 <G4119b>        &  1.  LossO3 & CH3O + NO2 = HCHO + HONO : 
 <G4121>         &  1.  LossO3 & CH3O2 + O3 = CH3O + 2 O2 : 
 <G4152>         &  1.  LossO3 & CH3 + O3 = .956 HCHO + .956 H + .044 CH3O + O2 : 
 <G4153>         &  1.  LossO3 & CH3 + O3P = .83 HCHO + .83 H + .17 CO + .17 H2 + .17 H : 
 <G4154>         &  1.  LossO3 & CH3O + O3 = CH3O2 + O2 : 
 <G4155>         &  1.  LossO3 & CH3O + O3P = .75 CH3 + .75 O2 + .25 HCHO + .25 OH : 
 <G4156>         &  1.  LossO3 & CH3O2 + O3P = CH3O + O2 : 
 <G4157>         &  1.  LossO3 & HCHO + O3P = .7 OH + .7 CO + .3 H + .3 CO2 + HO2 : 
 <G4201>         &  1.  LossO3 & C2H4 + O3 = HCHO + .63 CO + .13 HO2 + 0.23125 HCOOH + 0.13875 HCHO + 0.13875 H2O2 + .13 OH : 
 <G4204>         &  1.  ProdO3 & C2H5O2 + NO = CH3CHO + HO2 + NO2 : 
 <G4205>         &  1.  LossO3 & C2H5O2 + NO3 = CH3CHO + HO2 + NO2 : 
 <G4209>         &  1.  LossO3 & CH3CHO + NO3 = CH3CO3 + HNO3 : 
 <G4211b>        &  1.  ProdO3 & CH3CO3 + HO2 = CH3CO2H + O3 : 
 <G4212>         &  1.  ProdO3 & CH3CO3 + NO = CH3O2 + CO2 + NO2 : 
 <G4214>         &  1.  LossO3 & CH3CO3 + NO3 = CH3O2 + NO2 + CO2 : 
 <G4301>         &  1.  LossO3 & C3H6 + O3 = .57 HCHO + .47 CH3CHO + .33 OH + .26 HO2 + .07 CH3O2 + .06 C2H5O2 + .23 CH3CO3 + .04 MGLYOX + .06 CH4 + .31 CO + .22 HCOOH + .03 CH3OH : 
 <G4303>         &  1.  LossO3 & C3H6 + NO3 = LC4H9NO3 : 
 <G4305>         &  1.  ProdO3 & IC3H7O2 + NO = .96 CH3COCH3 + .96 HO2 + .96 NO2 + .04 IC3H7NO3 : 
 <G4305a>        &  1.  ProdO3 & IC3H7O2 + NO = CH3COCH3 + HO2 + NO2 : % op_pj_20141104
 <G4305b>        &  1.  ProdO3 & IC3H7O2 + NO = IC3H7NO3             : % op_pj_20141104
 <G4309>         &  1.  ProdO3 & LHOC3H6O2 + NO = .98 CH3CHO + .98 HCHO + .98 HO2 + .98 NO2 + .02 LC4H9NO3 : 
 <G4309a>        &  1.  ProdO3  & LHOC3H6O2  + NO = CH3CHO + HCHO + HO2 + NO2 : % op_pj_20141104
 <G4309b>        &  0.75 ProdO3 & LHOC3H6O2  + NO = .75 LC4H9NO3              : % op_pj_20141104
 <G4313>         &  1.  ProdO3 & CH3COCH2O2 + NO = CH3CO3 + HCHO + NO2 : 
 <G4403>         &  1.  ProdO3 & LC4H9O2 + NO = .84 NO2 + .56 MEK + .56 HO2 + .28 C2H5O2 + .28 CH3CHO + .16 LC4H9NO3 : 
 <G4403a>        &  1.  ProdO3 & LC4H9O2 + NO = NO2 + .667 MEK + .667 HO2 + .333 C2H5O2 + .333 CH3CHO : % op_pj_20141104
 <G4403b>        &  1.  ProdO3 & LC4H9O2 + NO = LC4H9NO3                                              : % op_pj_20141104
 <G4405>         &  1.  LossO3 & MVK + O3 = .45 HCOOH + .9 MGLYOX + .1 CH3CO3 + .19 OH + .22 CO + .32 HO2 : 
 <G4408>         &  1.  ProdO3 & MVKO2 + NO = NO2 + .25 CH3CO3 + .25 ACETOL + .75 HCHO + .25 CO + .75 HO2 + .5 MGLYOX : 
 <G4415>         &  1.  ProdO3 & LMEKO2 + NO = .985 CH3CHO + .985 CH3CO3 + .985 NO2 + .015 LC4H9NO3 : 
 <G4500>         &  1.  LossO3 & C5H8 + O3 = .28 HCOOH + .65 MVK + .1 MVKO2 + .1 CH3CO3 + .14 CO + .58 HCHO + .09 H2O2 + .08 CH3O2 + .25 OH + .25 HO2 : 
 <G4502>         &  1.  LossO3 & C5H8 + NO3 = ISON : 
 <G4504>         &  1.  ProdO3 & ISO2 + NO = .956 NO2 + .956 MVK + .956 HCHO + .956 HO2 + .044 ISON : 
 <G6101>         &  2.  LossO3 & ClO + O3P = Cl + O2 : 
 <G6102a>        &  2.  LossO3 & ClO + ClO = Cl2 + O2 : 
 <G6102b>        &  2.  LossO3 & ClO + ClO = 2 Cl + O2 : 
 <G6102c>        &  1.  LossO3 & ClO + ClO = Cl + OClO : 
 <G6201b>        &  1.  ProdO3 & Cl + HO2 = ClO + OH : 
 <G6203>         &  1.  LossO3 & ClO + OH = .94 Cl + .94 HO2 + .06 HCl + .06 O2 : 
 <G6403>         &  1.  LossO3 & ClO + CH3O2 = HO2 + Cl + HCHO : 
 <G6405>         &  1.  LossO3 & CH3Cl + O1D = LCARBON + OH + Cl : 
 <G6407>         &  1.  LossO3 & CH3CCl3 + O1D = 2 LCARBON + OH + 3 Cl : 
 <G7101>         &  2.  LossO3 & BrO + O3P = Br + O2 : 
 <G7102a>        &  2.  LossO3 & BrO + BrO = 2 Br + O2 : 
 <G7102b>        &  2.  LossO3 & BrO + BrO = Br2 + O2 : 
 <G7203>         &  1.  LossO3 & HOBr + O3P = OH + BrO : 
 <G7204>         &  1.  ProdO3 & Br2 + OH = HOBr + Br : 
 <G7402b>        &  1.  LossO3 & BrO + CH3O2 = Br + HCHO + HO2 : 
 <G7603a>        &  1.  LossO3 & BrO + ClO = Br + OClO : 
 <G7603b>        &  2.  LossO3 & BrO + ClO = Br + Cl + O2 : 
 <G7603c>        &  2.  LossO3 & BrO + ClO = BrCl + O2 : 
 <G8100>         &  1.  LossO3 & I + O3 = IO + O2 : 
 <G8300>         &  1.  LossO3 & I + NO2 = INO2 : 
 <G8301>         &  1.  LossO3 & I + NO3 = IO + NO2 : 
 <G8302>         &  1.  ProdO3 & IO + NO = I + NO2 : 
 <G8303>         &  1.  LossO3 & IO + NO2 = INO3 : 
 <G8304>         &  1.  ProdO3 & OIO + NO = NO2 + IO : 
 <G8305>         &  1.  ProdO3 & INO2 = I + NO2 : 
 <G8306>         &  1.  ProdO3 & INO3 = IO + NO2 : 
 <G8307>         &  2.  LossO3 & I2 + NO3 = I + INO3 : 
 <G8308>         &  1.  LossO3 & IO + NO3 = OIO + NO2 : 
 <G8402>         &  1.  LossO3 & CH3I + NO3 = HNO3 + HCHO + IO : 
 <G8600>         &  0.45  LossO3 & IO + ClO = .2 ICl + .25 Cl + .55 OClO + .8 I + .45 O2 : 
 <G8700>         &  1.  LossO3 & I + BrO = IO + Br : 
 <G8701>         &  1.  LossO3 & IO + BrO = Br + .8 OIO + .2 I + .2 O2 : 
 <G9100>         &  2.  ProdO3 & SO + O2 = SO2 + O3P : 
 <G9102>         &  1.  ProdO3 & S + O2 = SO + O3P : 
 <G9200>         &  1.  LossO3 & SO2 + OH = H2SO4 + HO2 : 
 <G9200a>        &  1.  LossO3 & SO2 + OH = SO3 + HO2 :
 <G9401>         &  1.  LossO3 & DMS + NO3 = CH3SO2 + HNO3 + HCHO : 
 <G9402>         &  0.6  ProdO3 & DMSO + OH = .6 H2O + .6 SO2 + HCHO + .6 CH3 + .4 HO2 + .4 CH3SO3H : 
 <G9403>         &  1.  ProdO3 & CH3SO2 = SO2 + CH3 : 
 <G9404>         &  1.  LossO3 & CH3SO2 + O3 = CH3SO3 : 
 <G9407>         &  1.  LossO3 & OCS + O3P = CO + SO : 
 <G9701>         &  1.  LossO3 & DMS + BrO = DMSO + Br : 
 <G10100>        &  1.  LossO3 & Hg + O3 = HgO + O2 : 
 <G10703>        &  1.  LossO3 & Hg + BrO = HgO + Br : 
 <G10704>        &  1.  LossO3 & HgBr + BrO = BrHgOBr : 
 <G10705>        &  1.  LossO3 & HgCl + BrO = ClHgOBr : 
 <J0001>         &  1.  LossO3 & O3P = Op + 2 em : 
 <J0002b>        &  1.  ProdO3 & O2 = Op + O3P + em : 
 <J1000a>        &  2.  ProdO3 & O2 + hv = O3P + O3P : 
 <J1000b>        &  2.  ProdO3 & O2 + hv = O3P + O1D : 
 <J1000d>        &  1.  ProdO3 & O2 + hv = Op + O3P : 
 <J1002>         &  1.  LossO3 & O3P + hv = Op : 
 <J2100b>        &  1.  ProdO3 & H2O + hv = H2 + O1D : 
 <J3100>         &  1.  ProdO3 & N2O + hv = O1D + N2 : 
 <J3102a>        &  1.  ProdO3 & NO + hv = N + O3P : 
 <J3103b>        &  2.  LossO3 & NO3 + hv = NO + O2 : 
 <J3202>         &  0.333  ProdO3 & HNO4 + hv = .667 NO2 + .667 HO2 + .333 NO3 + .333 OH : 
 <J41002>        &  1.  ProdO3 & CO2 + hv = CO + O3P : 
 <J41003>        &  0.0864  ProdO3 & CH4 + hv = .42 CH3 + .42 H + .6912 H2 + .0864 HCHO + .0864 O3P + .1584 OH + .1584 HO2 + .2112 CO2 + .1824 CO + .024 H2O + .10 LCARBON : 
 <J41005>        &  1.  ProdO3 & CH3NO3 + hv = CH3O + NO2 : 
 <J41006>        &  1.333  ProdO3 & CH3O2NO2 + hv = .667 NO2 + .667 CH3O2 + .333 NO3 + .333 CH3O : 
 <J6100>         &  2.  LossO3 & Cl2O2 + hv = 2 Cl : 
 <J6101>         &  1.  ProdO3 & OClO + hv = ClO + O3P : 
 <J6201>         &  1.  LossO3 & HOCl + hv = OH + Cl : 
 <J6300>         &  1.  ProdO3 & ClNO2 + hv = Cl + NO2 : 
 <J7200>         &  1.  LossO3 & HOBr + hv = Br + OH : 
 <J7300>         &  1.  ProdO3 & BrNO2 + hv = Br + NO2 : 
 <J7301>         &  5.9604645E-8  ProdO3 & BrNO3 + hv = .85 Br + .85 NO3 + .15 BrO + .15 NO2 : 
 <J8100>         &  1.  ProdO3 & IO + hv = I + O3P : 
 <J8300>         &  1.  ProdO3 & INO2 + hv = I + NO2 : 
 <J8301>         &  2.  ProdO3 & INO3 + hv = I + NO3 : 
 <HET200>        &  1.  LossO3 & N2O5 + H2O = 2 HNO3 : 
 <HET201>        &  3.  LossO3 & N2O5 = 2 NO3m_cs + 2 Hp_cs : 
 <HET410>        &  1.  LossO3 & HOCl + HCl = Cl2 + H2O : 
 <HET420>        &  1.  LossO3 & ClNO3 + HCl = Cl2 + HNO3 : 
 <HET422>        &  2.  LossO3 & N2O5 + HCl = ClNO2 + HNO3 : 
 <HET510>        &  1.  LossO3 & HOBr + HBr = Br2 + H2O : 
 <HET540>        &  1.  LossO3 & ClNO3 + HBr = BrCl + HNO3 : 
 <HET541>        &  1.  LossO3 & BrNO3 + HCl = BrCl + HNO3 : 
 <HET542>        &  1.  LossO3 & HOCl + HBr = BrCl + H2O : 
 <HET543>        &  1.  LossO3 & HOBr + HCl = BrCl + H2O : 
 <G6413>         &  1.  ProdO3 & Cl + CH3NO3 = HCl + HCHO + NO2 : 
 <G6415>         &  0.5  ProdO3 & Cl + CH3O2 = .5 ClO + .5 CH3O + .5 HCl + .5 CO + .5 HO2 + .5 OH : 
% op_ff_20160411+
% Extension of Crutzen and Schmailzl, 1983
% ODD =     O + O1D + O3 
%       + ClO + ClOH +  Cl2O2
%       + NO2 + HNO3 + 2 NO3 + 3 N2O5 + HNO4
%       + PAN + NACA 
%       + 2 ClONO2 + HO2NO2
%       + BrO + HOBr + 2 BrONO2
%
% This adds the tracers:
% - LossO3O    : ozone loss via O familiy
% - ProdO3O    : ozone production (negative loss) via O familiy
% - LossO3H    : ozone loss via H familiy
% - ProdO3H    : ozone production (negative loss) via H familiy
% - LossO3N    : ozone loss via N familiy
% - ProdO3N    : ozone production (negative loss) via N familiy
% - LossO3R    : ozone loss via R (rest) familiy 
% - ProdO3R    : ozone production (negative loss) via R (rest) familiy
% - LossO3Cl   : ozone loss via Cl familiy
% - ProdO3Cl   : ozone production (negative loss) via Cl familiy
% - LossO3Br   : ozone loss via Br familiy
% - ProdO3Br   : ozone production (negative loss) via Br familiy
% - LossO3S    : ozone loss via S familiy
% - ProdO3S    : ozone production (negative loss) via S familiy
% Ozone loss/prod via O-Family
% 
 <G1002a>        &  2.  LossO3O & O3 + O1D = 2 O2 : 
 <G1003>         &  2.  LossO3O & O3 + O3P = 2 O2 : 
 <G2111>         &  1.  LossO3O & H2O + O1D = 2 OH : 
 <G3102a>        &  1.  LossO3O & N2O + O1D = 2 NO : 
 <G3102b>        &  1.  LossO3O & N2O + O1D = N2 + O2 : 
 <J1000a>        &  2.  ProdO3O & O2 + hv = O3P + O3P : 
%#
% Ozone loss via H-Family
 <G2101>         &  1.  LossO3H & H + O3 = OH + O2 : 
 <G2102>         &  1.  LossO3H & H2 + O1D = H + OH : 
 <G2103>         &  1.  LossO3H & OH + O3P = H + O2 : 
 <G2104>         &  1.  LossO3H & OH + O3 = HO2 + O2 : 
 <G2106>         &  1.  LossO3H & HO2 + O3P = OH + O2 : 
 <G2107>         &  1.  LossO3H & HO2 + O3 = OH + 2 O2 : 
 <G2108c>        &  1.  ProdO3H & HO2 + H = O3P + H2O : 
%#
% Ozone loss via N-Family
 <G3100>         &  1.  ProdO3N & N + O2 = NO + O3P : 
 <G3104>         &  1.  ProdO3N & NO + N = O3P + N2 : 
 <G3105>         &  2.  LossO3N & NO2 + O3P = NO + O2 : 
 <G3201>         &  1.  ProdO3N & NO + HO2 = NO2 + OH :            % + ProdHO2 
 <G3204>         &  1.  LossO3N & NO3 + HO2 = NO2 + OH + O2 : 
 <G3205>         &  1.  ProdO3N & HONO + OH = NO2 + H2O : 
 <G3206>         &  1.  ProdO3N & HNO3 + OH = H2O + NO3 : 
 <G3210>         &  1.  LossO3N & NH2 + O3 = NH2O + O2 : 
 <G3215>         &  1.  LossO3N & NH2 + NO2 = N2O + H2O : 
 <G3216>         &  1.  LossO3N & NH2 + NO2 = NH2O + NO : 
 <G3217>         &  1.  LossO3N & NH2O + O3 = NH2 + O2 : 
 <G3221>         &  1.  LossO3N & HNO + NO2 = HONO + NO : 
 <J3100>         &  1.  ProdO3N & N2O + hv = O1D + N2 : 
 <J3102a>        &  1.  ProdO3N & NO + hv = N + O3P : 
 <J3103b>        &  2.  LossO3N & NO3 + hv = NO + O2 : 
 <J3202>         &  0.333  ProdO3N & HNO4 + hv = .667 NO2 + .667 HO2 + .333 NO3 + .333 OH : 
 <HET200>        &  1.  LossO3N & N2O5 + H2O = 2 HNO3 : 
 <HET201>        &  3.  LossO3N & N2O5 = 2 NO3m_cs + 2 Hp_cs : 
 <HET422>        &  1.  LossO3N & N2O5 + HCl = ClNO2 + HNO3 :  % 1/2 of total loss
%#
% Ozone loss via C-Family
 <G4100>         &  1.  LossO3C & CH4 + O1D = .75 CH3 + .75 OH + .2 CH3O + .2 H + .05 HCHO + .05 H2 : 
 <G4104a>        &  1.  ProdO3C & CH3O2 + NO = CH3O + NO2 : 
 <G4105>         &  1.  LossO3C & CH3O2 + NO3 = CH3O + NO2 + O2 : 
 <G4109>         &  1.  LossO3C & HCHO + NO3 = HNO3 + CO + HO2 : 
 <G4112>         &  1.  LossO3C & CO + O3P = CO2 : 
 <G4113>         &  1.  LossO3C & CH4 + O3P = .51 CH3 + .51 OH + .49 CH3O + .49 H : 
 <G4114>         &  1.  LossO3C & CH3O2 + NO2 = CH3O2NO2 : 
 <G4115>         &  1.  ProdO3C & CH3O2NO2 = CH3O2 + NO2 : 
 <G4116>         &  2.  ProdO3C & CH3O2NO2 + OH = HCHO + NO3 + H2O : 
 <G4117>         &  1.  ProdO3C & CH3NO3 + OH = H2O + HCHO + NO2 : 
 <G4119a>        &  1.  LossO3C & CH3O + NO2 = CH3NO3 : 
 <G4119b>        &  1.  LossO3C & CH3O + NO2 = HCHO + HONO : 
 <G4121>         &  1.  LossO3C & CH3O2 + O3 = CH3O + 2 O2 : 
 <G4152>         &  1.  LossO3C & CH3 + O3 = .956 HCHO + .956 H + .044 CH3O + O2 : 
 <G4153>         &  1.  LossO3C & CH3 + O3P = .83 HCHO + .83 H + .17 CO + .17 H2 + .17 H : 
 <G4154>         &  1.  LossO3C & CH3O + O3 = CH3O2 + O2 : 
 <G4155>         &  1.  LossO3C & CH3O + O3P = .75 CH3 + .75 O2 + .25 HCHO + .25 OH : 
 <G4156>         &  1.  LossO3C & CH3O2 + O3P = CH3O + O2 : 
 <G4157>         &  1.  LossO3C & HCHO + O3P = .7 OH + .7 CO + .3 H + .3 CO2 + HO2 : 
 <J41002>        &  1.  ProdO3C & CO2 + hv = CO + O3P : 
 <J41003>        &  0.0864  ProdO3C & CH4 + hv = .42 CH3 + .42 H + .6912 H2 + .0864 HCHO + .0864 O3P + .1584 OH + .1584 HO2 + .2112 CO2 + .1824 CO + .024 H2O + .10 LCARBON : 
 <J41005>        &  1.  ProdO3C & CH3NO3 + hv = CH3O + NO2 : 
 <J41006>        &  1.333  ProdO3C & CH3O2NO2 + hv = .667 NO2 + .667 CH3O2 + .333 NO3 + .333 CH3O : 
% Ozone loss via R-Family (mostly C >= 2)
 <G4201>         &  1.  LossO3R & C2H4 + O3 = HCHO + .63 CO + .13 HO2 + 0.23125 HCOOH + 0.13875 HCHO + 0.13875 H2O2 + .13 OH : 
 <G4204>         &  1.  ProdO3R & C2H5O2 + NO = CH3CHO + HO2 + NO2 : 
 <G4205>         &  1.  LossO3R & C2H5O2 + NO3 = CH3CHO + HO2 + NO2 : 
 <G4209>         &  1.  LossO3R & CH3CHO + NO3 = CH3CO3 + HNO3 : 
 <G4211b>        &  1.  ProdO3R & CH3CO3 + HO2 = CH3CO2H + O3 : 
 <G4212>         &  1.  ProdO3R & CH3CO3 + NO = CH3O2 + CO2 + NO2 : 
 <G4214>         &  1.  LossO3R & CH3CO3 + NO3 = CH3O2 + NO2 + CO2 : 
 <G4301>         &  1.  LossO3R & C3H6 + O3 = .57 HCHO + .47 CH3CHO + .33 OH + .26 HO2 + .07 CH3O2 + .06 C2H5O2 + .23 CH3CO3 + .04 MGLYOX + .06 CH4 + .31 CO + .22 HCOOH + .03 CH3OH : 
 <G4303>         &  1.  LossO3R & C3H6 + NO3 = LC4H9NO3 : 
 <G4305>         &  1.  ProdO3R & IC3H7O2 + NO = .96 CH3COCH3 + .96 HO2 + .96 NO2 + .04 IC3H7NO3 : 
 <G4309>         &  1.  ProdO3R & LHOC3H6O2 + NO = .98 CH3CHO + .98 HCHO + .98 HO2 + .98 NO2 + .02 LC4H9NO3 : 
 <G4313>         &  1.  ProdO3R & CH3COCH2O2 + NO = CH3CO3 + HCHO + NO2 : 
 <G4403>         &  1.  ProdO3R & LC4H9O2 + NO = .84 NO2 + .56 MEK + .56 HO2 + .28 C2H5O2 + .28 CH3CHO + .16 LC4H9NO3 : 
 <G4405>         &  1.  LossO3R & MVK + O3 = .45 HCOOH + .9 MGLYOX + .1 CH3CO3 + .19 OH + .22 CO + .32 HO2 : 
 <G4408>         &  1.  ProdO3R & MVKO2 + NO = NO2 + .25 CH3CO3 + .25 ACETOL + .75 HCHO + .25 CO + .75 HO2 + .5 MGLYOX : 
 <G4415>         &  1.  ProdO3R & LMEKO2 + NO = .985 CH3CHO + .985 CH3CO3 + .985 NO2 + .015 LC4H9NO3 : 
 <G4500>         &  1.  LossO3R & C5H8 + O3 = .28 HCOOH + .65 MVK + .1 MVKO2 + .1 CH3CO3 + .14 CO + .58 HCHO + .09 H2O2 + .08 CH3O2 + .25 OH + .25 HO2 : 
 <G4502>         &  1.  LossO3R & C5H8 + NO3 = ISON : 
 <G4504>         &  1.  ProdO3R & ISO2 + NO = .956 NO2 + .956 MVK + .956 HCHO + .956 HO2 + .044 ISON : 
%#
% Ozone loss via Cl-Family
 <G6101>         &  2.  LossO3Cl & ClO + O3P = Cl + O2 : 
 <G6102a>        &  2.  LossO3Cl & ClO + ClO = Cl2 + O2 : 
 <G6102b>        &  2.  LossO3Cl & ClO + ClO = 2 Cl + O2 : 
 <G6102c>        &  1.  LossO3Cl & ClO + ClO = Cl + OClO : 
 <G6201b>        &  1.  ProdO3Cl & Cl + HO2 = ClO + OH : 
 <G6203>         &  1.  LossO3Cl & ClO + OH = .94 Cl + .94 HO2 + .06 HCl + .06 O2 : 
 <G6403>         &  1.  LossO3Cl & ClO + CH3O2 = HO2 + Cl + HCHO : 
 <G6405>         &  1.  LossO3Cl & CH3Cl + O1D = LCARBON + OH + Cl : 
 <G6407>         &  1.  LossO3Cl & CH3CCl3 + O1D = 2 LCARBON + OH + 3 Cl : 
 <J6100>         &  2.  LossO3Cl & Cl2O2 + hv = 2 Cl : 
 <J6101>         &  1.  ProdO3Cl & OClO + hv = ClO + O3P : 
 <J6201>         &  1.  LossO3Cl & HOCl + hv = OH + Cl : 
 <J6300>         &  1.  ProdO3Cl & ClNO2 + hv = Cl + NO2 : 
 <HET410>        &  1.  LossO3Cl & HOCl + HCl = Cl2 + H2O :
 <G6413>         &  1.  ProdO3Cl & Cl + CH3NO3 = HCl + HCHO + NO2 :  
 <G6415>         &  0.5  ProdO3Cl & Cl + CH3O2 = .5 ClO + .5 CH3O + .5 HCl + .5 CO + .5 HO2 + .5 OH : 
 <HET420>        &  1.  LossO3Cl & ClNO3 + HCl = Cl2 + HNO3 : 
 <HET422>        &  1.  LossO3Cl & N2O5 + HCl = ClNO2 + HNO3 : % 1/2 of total loss
 <G7603a>        &  0.5  LossO3Cl & BrO + ClO = Br + OClO :  % 1/2 of total loss
 <G7603b>        &  1.  LossO3Cl & BrO + ClO = Br + Cl + O2 :  % 1/2 of total loss
 <G7603c>        &  1.  LossO3Cl & BrO + ClO = BrCl + O2 :  % 1/2 of total loss
 <HET540>        &  0.5  LossO3Cl & ClNO3 + HBr = BrCl + HNO3 :  % 1/2 of total loss
 <HET541>        &  0.5  LossO3Cl & BrNO3 + HCl = BrCl + HNO3 :  % 1/2 of total loss
 <HET542>        &  0.5  LossO3Cl & HOCl + HBr = BrCl + H2O :  % 1/2 of total loss
 <HET543>        &  0.5  LossO3Cl & HOBr + HCl = BrCl + H2O :  % 1/2 of total loss
%#
% Ozone loss via Br-Family
 <G7101>         &  2.  LossO3Br & BrO + O3P = Br + O2 : 
 <G7102a>        &  2.  LossO3Br & BrO + BrO = 2 Br + O2 : 
 <G7102b>        &  2.  LossO3Br & BrO + BrO = Br2 + O2 : 
 <G7203>         &  1.  LossO3Br & HOBr + O3P = OH + BrO : 
 <G7204>         &  1.  ProdO3Br & Br2 + OH = HOBr + Br : 
 <G7402b>        &  1.  LossO3Br & BrO + CH3O2 = Br + HCHO + HO2 : 
 <J7200>         &  1.  LossO3Br & HOBr + hv = Br + OH : 
 <J7300>         &  1.  ProdO3Br & BrNO2 + hv = Br + NO2 : 
 <J7301>         &  5.9604645E-8  ProdO3Br & BrNO3 + hv = .85 Br + .85 NO3 + .15 BrO + .15 NO2 : % =~ 0. ProdO3Br
 <HET510>        &  1.  LossO3Br & HOBr + HBr = Br2 + H2O : 
 <G7603a>        &  0.5  LossO3Br & BrO + ClO = Br + OClO :  % 1/2 of total loss
 <G7603b>        &  1.  LossO3Br & BrO + ClO = Br + Cl + O2 :  % 1/2 of total loss
 <G7603c>        &  1.  LossO3Br & BrO + ClO = BrCl + O2 :  % 1/2 of total loss
 <HET540>        &  0.5  LossO3Br & ClNO3 + HBr = BrCl + HNO3 :  % 1/2 of total loss
 <HET541>        &  0.5  LossO3Br & BrNO3 + HCl = BrCl + HNO3 :  % 1/2 of total loss
 <HET542>        &  0.5  LossO3Br & HOCl + HBr = BrCl + H2O :  % 1/2 of total loss
 <HET543>        &  0.5  LossO3Br & HOBr + HCl = BrCl + H2O :  % 1/2 of total loss
%#
% Ozone loss via S-Family
 <G9200>         &  1.  LossO3S & SO2 + OH = H2SO4 + HO2 : 
 <G9401>         &  1.  LossO3S & DMS + NO3 = CH3SO2 + HNO3 + HCHO : 
 <G9402>         &  0.6  ProdO3S & DMSO + OH = .6 H2O + .6 SO2 + HCHO + .6 CH3 + .4 HO2 + .4 CH3SO3H : 
 <G9403>         &  1.  ProdO3S & CH3SO2 = SO2 + CH3 : 
 <G9404>         &  1.  LossO3S & CH3SO2 + O3 = CH3SO3 : 
 <G9701>         &  1.  LossO3S & DMS + BrO = DMSO + Br : 
% op_ff_20160411-
%
% op_pg_20130122+
%budget analysis for short-lived halogens L=long-lived S=short-lived
%
%Cl
<G6404>       &  4.0  ProdLCl & CCl4 + O1D = ClO + 3 Cl :
<G6405>       &  1.0  ProdLCl & CH3Cl + O1D = OH + Cl :
<G6406>       &  1.0  ProdLCl & CH3Cl + OH  = H2O + Cl :
<G6407>       &  3.0  ProdLCl & CH3CCl3 + O1D = OH + 3 Cl :
<G6408>       &  3.0  ProdLCl & CH3CCl3 + OH  = H2O + 3 Cl :
<G6500>       &  2.0  ProdLCl & CF2Cl2 + O1D = ClO + Cl :
<G6501>       &  3.0  ProdLCl & CFCl3 + O1D = ClO + 2 Cl :
%
%Br
<G7403>        &  1.0  ProdLBr & CH3Br + OH = H2O + Br :
<G7407>        &  3.0  ProdSBr & CHBr3 + OH = H2O + 3 Br :
<G7408>        &  2.0  ProdSBr & CH2Br2 + OH = H2O + 2 Br :
%
%------------ no Cl-Production ----
<G7605>        &  1.0  ProdSBr & CHCl2Br + OH = H2O + Br :
<G7606>        &  2.0  ProdSBr & CHClBr2 + OH = H2O + 2 Br :
<G7607>        &  1.0  ProdSBr & CH2ClBr + OH = H2O + Br :
%------------                    ----
%
%Photolysis
%
%Cl
<J6400>        &  1.0  ProdLCl & CH3Cl + hv = Cl + CH3O2 :
<J6401>        &  4.0  ProdLCl & CCl4  + hv = 4 Cl  :
<J6402>        &  3.0  ProdLCl & CH3CCl3 + hv = 3 Cl :
<J6500>        &  3.0  ProdLCl & CFCl3 + hv = 3 Cl :
<J6501>        &  2.0  ProdLCl & CF2Cl2 + hv = 2 Cl :
%
%Br
<J7400>        &  1.0  ProdLBr & CH3Br + hv = Br + CH3O2 :
<J7401>        &  2.0  ProdSBr & CH2Br2 + hv = 2 Br :
<J7402>        &  3.0  ProdSBr & CHBr3 + hv = 3 Br :
<J7500>        &  1.0  ProdLBr & CF3Br + hv = Br :
%
%---Cl+Br
<J7601>        &  1.0  ProdLBr + 1.0 ProdLCl & CF2ClBr + hv = Br + Cl :
<J7602>        &  1.0  ProdSBr + 1.0 ProdSCl & CH2ClBr + hv = Br + Cl :
<J7603>        &  1.0  ProdSBr + 2.0 ProdSCl & CHCl2Br + hv = Br + 2 Cl :
<J7604>        &  2.0  ProdSBr + 1.0 ProdSCl & CHClBr2 + hv = 2 Br + Cl :
%
%I J8401 I-Production?
%
%op_pg_20130122-
%
