# Supplementary material for: Oxidation of low-molecular weight organic compounds in clouddroplets: development of the JAMOC chemical mechanism inCAABA/MECCA (version 4.5.0gmdd)
Source: Copernicus journal article supplement (doi:10.5194/gmd-2020-337), 2020-10-29
Supplement: Supplementary file 20 [file gmd-2020-337-supplement.zip › caaba_4.5.0gmdd/mecca/diagtrac/old/ESMVal-butkov.tex]

%op_vg_20130123+
% Explanations: 
% - The submodel  o3orig needs effective ozone production and loss terms. These are LossO3 and ProdO3.
% - For diagnostical purpose individual production and loss terms are defined:
%       Troposphere: ProdHO2    Production via NO+HO2
%                    ProdMeO2   Production via NO+CH3O2
%                    ProdRO2    Production via NO+RO2 
%                    LossOH     Ozone loss via O3+OH
%                    LossHO2    Ozone loss via O3+HO2
%                    LossO1D    Ozone loss via H2O+O1D (see Ozone definition below)
%                               = OH Production!
%       Stratosphere: LossO3x  x=O,N,H,Cl,Br Loss processes via Ox, NOx, HOx, ClOx and BrOx ozone desctruction.
% - ProdRO2 has been adapted to fit the ozone definition below.
% - Production terms for BrOx from emitted species according to their ilfetime (VSLS=s and others =l) dignosed
%   (op_pg)
% - rpl file ts2000.rpl considered
% - check that mecca_gas_mim1.eqn (04/2011) and gas_mim1.eqn (01/2013) leads to same diagnostic
%op_vg_20130123-
 % Automatically generated Prod and loss terms for the familly defined below
 % Used program: prodloss.f90 (V. Grewe)
 % Input: equationfile mecca.eqn
 % Family: O3 = 
 %                   1.  x O3
 %                +  1.  x O3P
 %                +  1.  x O1D
 %                +  1.  x ClO
 %                +  1.  x HOCl
 %                +  2.  x Cl2O2
 %                +  1.  x OClO
 %                +  1.  x NO2
 %                +  1.  x HNO3
 %                +  2.  x NO3
 %                +  3.  x N2O5
 %                +  1.  x HNO4
 %                +  1.  x PAN
 %                +  1.  x NACA
 %                +  1.  x MPAN
 %                +  1.  x IC3H7NO3
 %                +  1.  x LC4H9NO3
 %                +  1.  x ISON
 %                +  2.  x ClNO3
 %                +  1.  x BrO
 %                +  1.  x HOBr
 %                +  2.  x BrNO3
 %                +  1.  x SO2
 <G1002a>        &  2.  LossO3 & O3 + O1D = 2 O2 : 
 <G1003>         &  2.  LossO3 & O3 + O3P = 2 O2 : 
 <G1004>         &  1.  ProdO3 & O2 + Op = O2p + O3P : 
 <G1101>         &  2.  ProdO3 & O2p + em = 2 O3P : 
 <G2101>         &  1.  LossO3 & H + O3 = OH + O2 : 
 <G2102>         &  1.  LossO3 & H2 + O1D = H + OH : 
 <G2103>         &  1.  LossO3 & OH + O3P = H + O2 : 
 <G2104>         &  1.  LossO3 & OH + O3 = HO2 + O2 : 
 <G2106>         &  1.  LossO3 & HO2 + O3P = OH + O2 : 
 <G2107>         &  1.  LossO3 & HO2 + O3 = OH + 2 O2 : 
 <G2108c>        &  1.  ProdO3 & HO2 + H = O3P + H2O : 
 <G2111>         &  1.  LossO3 & H2O + O1D = 2 OH : 
 <G2113>         &  1.  LossO3 & H2 + O3P = H + OH : 
 <G2114a>        &  1.  ProdO3 & OH + OH = H2O + O3P : 
 <G2116>         &  1.  LossO3 & H2O2 + O3P = OH + HO2 : 
 <G3001>         &  1.  ProdO3 & NOp + em = 0.15 N + 0.85 N2D + O3P : 
 <G3100>         &  1.  ProdO3 & N + O2 = NO + O3P : 
 <G3102a>        &  1.  LossO3 & N2O + O1D = 2 NO : 
 <G3102b>        &  1.  LossO3 & N2O + O1D = N2 + O2 : 
 <G3104>         &  1.  ProdO3 & NO + N = O3P + N2 : 
 <G3105>         &  2.  LossO3 & NO2 + O3P = NO + O2 : 
 <G3111>         &  1.  ProdO3 & N2D + NO = N2 + O3P : 
 <G3112>         &  1.  ProdO3 & N2D + O2 = NO + O3P : 
 <G3114>         &  1.  LossO3 & N2D + O3 = NO + O2 : 
 <G3119>         &  1.  LossO3 & N2p + O3P = NOp + N2D : 
 <G3120a>        &  1.  ProdO3 & Np + O2 = NOp + O3P : 
 <G3121>         &  1.  LossO3 & Np + O3P = Op + N : 
 <G3122>         &  1.  ProdO3 & O2p + N = NOp + O3P : 
 <G3201>         &  1.  ProdO3 & NO + HO2 = NO2 + OH : 
% op_pj_20140926+: manually added for Butkovskaya rate changes
 <G3201a>        &  1.  ProdO3 & NO + HO2 = NO2 + OH : 
 <G3201b>        &  1.  ProdO3 & NO + HO2 = NO2 + OH :
 <G3201aKG>      &  1.  ProdO3 & NO + HO2 = 1.0 LossG3201bKG + HNO3 :
 <G3201bKG>      &  1.  ProdO3 & NO + HO2 = 1.0 LossG3201bKG + HNO3 :
% op_pj_20140926-
 <G3204>         &  1.  LossO3 & NO3 + HO2 = NO2 + OH + O2 : 
 <G3205>         &  1.  ProdO3 & HONO + OH = NO2 + H2O : 
 <G3206>         &  1.  ProdO3 & HNO3 + OH = H2O + NO3 : 
 <G3210>         &  1.  LossO3 & NH2 + O3 = NH2O + O2 : 
 <G3215>         &  1.  LossO3 & NH2 + NO2 = N2O + H2O : 
 <G3216>         &  1.  LossO3 & NH2 + NO2 = NH2O + NO : 
 <G3217>         &  1.  LossO3 & NH2O + O3 = NH2 + O2 : 
 <G3221>         &  1.  LossO3 & HNO + NO2 = HONO + NO : 
 <G3226>         &  1.  LossO3 & NO2 + H = NO + OH : 
 <G4100>         &  1.  LossO3 & CH4 + O1D = .75 CH3O2 + .75 OH + .25 HCHO + .4 H + .05 H2 : 
 <G4104>         &  1.  ProdO3 & CH3O2 + NO = HCHO + NO2 + HO2 : 
 <G4105>         &  1.  LossO3 & CH3O2 + NO3 = HCHO + HO2 + NO2 : 
 <G4109>         &  1.  LossO3 & HCHO + NO3 = HNO3 + CO + HO2 : 
 <G4112>         &  1.  LossO3 & CO + O3P = CO2 : 
 <G4113>         &  1.  LossO3 & CH4 + O3P = CO + 2 OH + H2O : 
 <G4201>         &  1.  LossO3 & C2H4 + O3 = HCHO + .63 CO + .13 HO2 + 0.23125 HCOOH + 0.13875 HCHO + 0.13875 H2O2 + .13 OH : 
 <G4204>         &  1.  ProdO3 & C2H5O2 + NO = CH3CHO + HO2 + NO2 : 
 <G4205>         &  1.  LossO3 & C2H5O2 + NO3 = CH3CHO + HO2 + NO2 : 
 <G4209>         &  1.  LossO3 & CH3CHO + NO3 = CH3CO3 + HNO3 : 
 <G4211b>        &  1.  ProdO3 & CH3CO3 + HO2 = CH3CO2H + O3 : 
 <G4212>         &  1.  ProdO3 & CH3CO3 + NO = CH3O2 + CO2 + NO2 : 
 <G4214>         &  1.  LossO3 & CH3CO3 + NO3 = CH3O2 + NO2 + CO2 : 
 <G4301>         &  1.  LossO3 & C3H6 + O3 = .57 HCHO + .47 CH3CHO + .33 OH + .26 HO2 + .07 CH3O2 + .06 C2H5O2 + .23 CH3CO3 + .04 MGLYOX + .06 CH4 + .31 CO + .22 HCOOH + .03 CH3OH : 
 <G4303>         &  1.  LossO3 & C3H6 + NO3 = LC4H9NO3 : 
 <G4305>         &  1.  ProdO3 & IC3H7O2 + NO = .96 CH3COCH3 + .96 HO2 + .96 NO2 + .04 IC3H7NO3 : 
 <G4309>         &  1.  ProdO3 & LHOC3H6O2 + NO = .98 CH3CHO + .98 HCHO + .98 HO2 + .98 NO2 + .02 LC4H9NO3 : 
 <G4313>         &  1.  ProdO3 & CH3COCH2O2 + NO = CH3CO3 + HCHO + NO2 : 
 <G4403>         &  1.  ProdO3 & LC4H9O2 + NO = .84 NO2 + .56 MEK + .56 HO2 + .28 C2H5O2 + .28 CH3CHO + .16 LC4H9NO3 : 
 <G4405>         &  1.  LossO3 & MVK + O3 = .45 HCOOH + .9 MGLYOX + .1 CH3CO3 + .19 OH + .22 CO + .32 HO2 : 
 <G4408>         &  1.  ProdO3 & MVKO2 + NO = NO2 + .25 CH3CO3 + .25 ACETOL + .75 HCHO + .25 CO + .75 HO2 + .5 MGLYOX : 
 <G4415>         &  1.  ProdO3 & LMEKO2 + NO = .985 CH3CHO + .985 CH3CO3 + .985 NO2 + .015 LC4H9NO3 : 
 <G4500>         &  1.  LossO3 & C5H8 + O3 = .28 HCOOH + .65 MVK + .1 MVKO2 + .1 CH3CO3 + .14 CO + .58 HCHO + .09 H2O2 + .08 CH3O2 + .25 OH + .25 HO2 : 
 <G4502>         &  1.  LossO3 & C5H8 + NO3 = ISON : 
 <G4504> <        &  1.  ProdO3 & ISO2 + NO = .956 NO2 + .956 MVK + .956 HCHO + .956 HO2 + .044 ISON : % op_j_20111204
 <G6101>         &  2.  LossO3 & ClO + O3P = Cl + O2 : 
 <G6102a>        &  2.  LossO3 & ClO + ClO = Cl2 + O2 : 
 <G6102b>        &  2.  LossO3 & ClO + ClO = 2 Cl + O2 : 
 <G6102c>        &  1.  LossO3 & ClO + ClO = Cl + OClO : 
 <G6201b>        &  1.  ProdO3 & Cl + HO2 = ClO + OH : 
 <G6203>         &  1.  LossO3 & ClO + OH = .94 Cl + .94 HO2 + .06 HCl + .06 O2 : 
 <G6403>         &  1.  LossO3 & ClO + CH3O2 = HO2 + Cl + HCHO : 
 <G6405>         &  1.  LossO3 & CH3Cl + O1D = OH + Cl : 
 <G6407>         &  1.  LossO3 & CH3CCl3 + O1D = OH + 3 Cl : 
 <G7101>         &  2.  LossO3 & BrO + O3P = Br + O2 : 
 <G7102a>        &  2.  LossO3 & BrO + BrO = 2 Br + O2 : 
 <G7102b>        &  2.  LossO3 & BrO + BrO = Br2 + O2 : 
 <G7203>         &  1.  LossO3 & HOBr + O3P = OH + BrO : 
 <G7204>         &  1.  ProdO3 & Br2 + OH = HOBr + Br : 
 <G7402b>        &  1.  LossO3 & BrO + CH3O2 = Br + HCHO + HO2 : 
 <G7603a>        &  1.  LossO3 & BrO + ClO = Br + OClO : 
 <G7603b>        &  2.  LossO3 & BrO + ClO = Br + Cl + O2 : 
 <G7603c>        &  2.  LossO3 & BrO + ClO = BrCl + O2 : 
 <G8100>         &  1.  LossO3 & I + O3 = IO + O2 : 
 <G8300>         &  1.  LossO3 & I + NO2 = INO2 : 
 <G8301>         &  1.  LossO3 & I + NO3 = IO + NO2 : 
 <G8302>         &  1.  ProdO3 & IO + NO = I + NO2 : 
 <G8303>         &  1.  LossO3 & IO + NO2 = INO3 : 
 <G8304>         &  1.  ProdO3 & OIO + NO = NO2 + IO : 
 <G8305>         &  1.  ProdO3 & INO2 = I + NO2 : 
 <G8306>         &  1.  ProdO3 & INO3 = IO + NO2 : 
 <G8307>         &  2.  LossO3 & I2 + NO3 = I + INO3 : 
 <G8308>         &  1.  LossO3 & IO + NO3 = OIO + NO2 : 
 <G8402>         &  1.  LossO3 & CH3I + NO3 = HNO3 + HCHO + IO : 
 <G8600>         &  0.45  LossO3 & IO + ClO = .2 ICl + .25 Cl + .55 OClO + .8 I + .45 O2 : 
 <G8700>         &  1.  LossO3 & I + BrO = IO + Br : 
 <G8701>         &  1.  LossO3 & IO + BrO = Br + .8 OIO + .2 I + .2 O2 : 
 <G9200>         &  1.  LossO3 & SO2 + OH = H2SO4 + HO2 : 
 <G9200a>        &  1.  LossO3 & SO2 + OH = SO3 + HO2 :
 <G9401>         &  1.  LossO3 & DMS + NO3 = CH3SO2 + HNO3 + HCHO : 
 <G9402>         &  0.6  ProdO3 & DMSO + OH = .6 SO2 + HCHO + .6 CH3O2 + .4 HO2 + .4 CH3SO3H : 
 <G9403>         &  1.  ProdO3 & CH3SO2 = SO2 + CH3O2 : 
 <G9404>         &  1.  LossO3 & CH3SO2 + O3 = CH3SO3 : 
 <G9701>         &  1.  LossO3 & DMS + BrO = DMSO + Br : 
 <G10100>        &  1.  LossO3 & Hg + O3 = HgO + O2 : 
 <G10703>        &  1.  LossO3 & Hg + BrO = HgO + Br : 
 <G10704>        &  1.  LossO3 & HgBr + BrO = BrHgOBr : 
 <G10705>        &  1.  LossO3 & HgCl + BrO = ClHgOBr : 
 <J0001>         &  1.  LossO3 & O3P = Op + 2 em : 
 <J0002b>        &  1.  ProdO3 & O2 = Op + O3P + em : 
 <J1000a>        &  2.  ProdO3 & O2 + hv = O3P + O3P : 
 <J1000b>        &  2.  ProdO3 & O2 + hv = O3P + O1D : 
 <J1000d>        &  1.  ProdO3 & O2 + hv = Op + O3P : 
 <J1002>         &  1.  LossO3 & O3P + hv = Op : 
 <J2100b>        &  1.  ProdO3 & H2O + hv = H2 + O1D : 
 <J3100>         &  1.  ProdO3 & N2O + hv = O1D + N2 : 
 <J3102a>        &  1.  ProdO3 & NO + hv = N + O3P : 
 <J3103b>        &  2.  LossO3 & NO3 + hv = NO + O2 : 
 <J3202>         &  0.333  ProdO3 & HNO4 + hv = .667 NO2 + .667 HO2 + .333 NO3 + .333 OH : 
 <J4102>        &  1.  ProdO3 & CO2 + hv = CO + O3P : 
 <J6100>         &  2.  LossO3 & Cl2O2 + hv = 2 Cl : 
 <J6101>         &  1.  ProdO3 & OClO + hv = ClO + O3P : 
 <J6201>         &  1.  LossO3 & HOCl + hv = OH + Cl : 
 <J6300>         &  1.  ProdO3 & ClNO2 + hv = Cl + NO2 : 
 <J7200>         &  1.  LossO3 & HOBr + hv = Br + OH : 
 <J7300>         &  1.  ProdO3 & BrNO2 + hv = Br + NO2 : 
 <J8100>         &  1.  ProdO3 & IO + hv = I + O3P : 
 <J8300>         &  1.  ProdO3 & INO2 + hv = I + NO2 : 
 <J8301>         &  2.  ProdO3 & INO3 + hv = I + NO3 : 
 <HET200>        &  1.  LossO3 & N2O5 + H2O = 2 HNO3 : 
 <HET201>        &  3.  LossO3 & N2O5 = 2 NO3m_cs + 2 Hp_cs : 
 <HET410>        &  1.  LossO3 & HOCl + HCl = Cl2 + H2O : 
 <HET420>        &  1.  LossO3 & ClNO3 + HCl = Cl2 + HNO3 : 
 <HET422>        &  2.  LossO3 & N2O5 + HCl = ClNO2 + HNO3 : 
 <HET510>        &  1.  LossO3 & HOBr + HBr = Br2 + H2O : 
 <HET540>        &  1.  LossO3 & ClNO3 + HBr = BrCl + HNO3 : 
 <HET541>        &  1.  LossO3 & BrNO3 + HCl = BrCl + HNO3 : 
 <HET542>        &  1.  LossO3 & HOCl + HBr = BrCl + H2O : 
 <HET543>        &  1.  LossO3 & HOBr + HCl = BrCl + H2O : 
 <G9100>         &  2.  ProdO3 & SO + O2 = SO2 + O3P : 
 <G9102>         &  1.  ProdO3 & S + O2 = SO + O3P : 
 <G9407>         &  1.  LossO3 & OCS + O3P = CO + SO : 

%
%
%mz_pj_20080320+
% 'old' O3 budget diagnostic from Joeckel et al., (2006)
<G2107> & LossHO2        & HO2  + O3       = OH
<G2104> & LossOH         & OH   + O3       = HO2
<G2111> & LossO1D        & H2O  + O1D      = 2 OH 
<G3201> & ProdHO2        & NO   + HO2      = NO2   + OH
<G4104> & ProdMeO2       & CH3O2 + NO      = HCHO + NO2 + HO2
<G4204> & ProdRO2        & C2H5O2  + NO      = CH3CHO + HO2 + NO2
<G4212> & ProdRO2        & CH3CO3    + NO      = CH3O2 + NO2
%<G4305> & 0.96 ProdRO2   & IC3H7O2  + NO      = .96 CH3COCH3 + .96 HO2 + .96 NO2 + .04 IC3H7NO3  
%<G4309> & 0.98 ProdRO2   & LHOC3H6O2 + NO     = .98 CH3CHO + .98 HCHO + .98 HO2 + .98 NO2 + .02 LC4H9NO3 
<G4305> & ProdRO2   & IC3H7O2  + NO      = .96 CH3COCH3 + .96 HO2 + .96 NO2 + .04 IC3H7NO3          %op_vg_20130123
<G4309> & ProdRO2   & LHOC3H6O2 + NO     = .98 CH3CHO + .98 HCHO + .98 HO2 + .98 NO2 + .02 LC4H9NO3 %op_vg_20130123
<G4313> & ProdRO2        & CH3COCH2O2  + NO    = NO2 + CH3CO3 + HCHO
<G4403> & ProdRO2        & LC4H9O2  + NO    = .84 NO2 + .56 MEK + .56 HO2 + .28 C2H5O2 + .84 CH3CHO + .16 LC4H9NO3
<G4408> & ProdRO2        & MVKO2   + NO    = NO2 + .25 CH3CO3 + .25 ACETOL + .75 HCHO + .25 CO + .75 HO2 + .5 MGLYOX
%<G4415> & 0.985 ProdRO2  & LMEKO2   + NO    = .985 CH3CHO + .985 CH3CO3 + .985 NO2 + .015 LC4H9NO3  
%<G4504> & 0.956 ProdRO2 & ISO2  + NO      = .956 NO2 + .956 MVK + .956 HCHO + .956 HO2 + .044 ISON 
<G4415> & ProdRO2  & LMEKO2   + NO    = .985 CH3CHO + .985 CH3CO3 + .985 NO2 + .015 LC4H9NO3         %op_vg_20130123
<G4504> & ProdRO2 & ISO2  + NO      = .956 NO2 + .956 MVK + .956 HCHO + .956 HO2 + .044 ISON        %op_vg_20130123
%mz_pj_20080320-
%
% op_vg_20100630+
% Ozone loss via O-Family
% Extension of Crutzen and Schmailzl, 1983
% ODD =     O + O1D + O3 
%       + ClO + ClOH +  Cl2O2
%       + NO2 + HNO3 + 2 NO3 + 3 N2O5 + HNO4
%       + PAN + NACA 
%       + 2 ClONO2 + HO2NO2
%       + BrO + HOBr + 2 BrONO2
<G1002a> &  2.0 LossO3O  & O3   + O1D      = 2 O2
<G1003>  &  2.0 LossO3O  & O3   + O3P      = 2 O2
<G2111>  &      LossO3O  & H2O  + O1D      = 2 OH
<G3102a> &      LossO3O  & N2O  + O1D      = 2 NO
<G3102aa> &     LossO3O  &                           % op_pj_20100723
<G3102b> &      LossO3O  & N2O  + O1D      = N2 + O2
<G3102bb> &     LossO3O  &                           % op_pj_20100723
%#
% Ozone loss via H-Family
<G2101>  &     LossO3H  & H    + O3       = OH
<G2102>  &     LossO3H  & H2   + O1D      = H + OH
<G2103>  &     LossO3H  & OH   + O3P      = H
<G2104>  &     LossO3H  & OH   + O3       = HO2
<G2106>  &     LossO3H  & HO2  + O3P      = OH
<G2107>  &     LossO3H  & HO2  + O3       = OH
<G2108c> &     LossO3Hn  & HO2  + H        = O3P + H2O
% Ozone loss via N-Family
<G3100>  &      LossO3Nn  & N    + O2       = NO + O3P
<G3104>  &      LossO3Nn  & NO   + N        = O3P + N2
<G3105>  &  2.0 LossO3N  & NO2  + O3P      = NO + O2
<G3204>  &      LossO3N  & NO3  + HO2      = NO2 + OH + O2
<G3205>  &      LossO3Nn  & HONO + OH       = NO2 + H2O
<G3206>  &      LossO3Nn  & HNO3 + OH       = H2O   + NO3
<G6300>  &      LossO3Nn  & ClO   + NO      = NO2 + Cl
<G7301>  &      LossO3Nn  & BrO  + NO       = Br  + NO2
<G4105>  &      LossO3N  & CH3O2   + NO3   = HCHO + HO2 + NO2
<G4109>  &      LossO3N  & HCHO    + NO3   = HNO3 + CO + HO2
<G4209>  &      LossO3N  & CH3CHO  + NO3   = CH3CO3 + HNO3
<G4214>  &      LossO3N  & CH3CO3  + NO3   = CH3O2 + NO2
<HET200> &      LossO3N  &    N2O5 + H2O  = HNO3 + HNO3
<J3103b> &  2.0 LossO3N  & NO3     + hv    = NO
<G3105>  &  2.0 LossO3N2 & NO2  + O3P      = NO + O2
% Ozone loss via R-Family
<G4201>  &      LossO3R  & C2H4    + O3      = HCHO + .22 HO2 + .12 OH + .23 CO + .54 HCOOH + .1 H2
<G4301>  &      LossO3R  & C3H6    + O3      = .57 HCHO + .47 CH3CHO + .33 OH + .26 HO2 + .07 CH3O2 + .06 C2H5O2 + .23 CH3CO3 + .04 CH3COCHO + .06 CH4 + .31 CO + .22 HCOOH + .03 CH3OH
<G4405>  &      LossO3R  & MVK     + O3      = .45 HCOOH + .9 CH3COCHO + .1 CH3CO3 + .19 OH + .22 CO + .32 HO2
<G4500>  &      LossO3R  & C5H8  + O3        = .28 HCOOH + .65 MVK + .1 MVKO2  + .1 CH3CO3 + .14 CO + .58 HCHO + .09 H2O2 + .08 CH3O2 + .25 OH + .25 HO2
%
% Ozone loss via Cl-Family
%
<G6101>  &  2.0 LossO3Cl & ClO + O3P       = Cl
<G6201b> &      LossO3Cln & Cl + HO2        = ClO + OH
<G6203>  &      LossO3Cl & ClO + OH        = Cl  + HO2
<G6203a> &      LossO3Cl & ClO + OH        = Cl  + HO2
<G6203b> &      LossO3Cl & ClO + OH        = HCl
<G6300>  &  1.0 LossO3Cl & ClO   + NO       = NO2 + Cl
<G6403>  &      LossO3Cl & ClO     + CH3O2  = HO2 + Cl + HCHO 
<G6405>  &      LossO3Cl & CH3Cl   + O1D    = OH + Cl {+...>
<G6405a> &      LossO3Cl &                                 % op_pj_20100723
%<G6405b> &      LossO3Cl &                                 % op_pj_20100723
<G6407>  &      LossO3Cl & CH3CCl3 + O1D    = OH + 3 Cl {+...>
<G6407a> &      LossO3Cl &                                 % op_pj_20100723
%<G6407b> &      LossO3Cl &                                 % op_pj_20100723
<G7603b> &      LossO3Cl & BrO  + ClO      = Br   + Cl
<G7603c> &      LossO3Cl & BrO  + ClO      = BrCl
<J6201>  &      LossO3Cl & HOCl    + hv = OH + Cl 
<HET410> &      LossO3Cl & HOCl  + HCl = Cl2 + H2O
<HET420> &      LossO3Cl & ClNO3 + HCl = Cl2 + HNO3 
<HET540> &      LossO3Cl & ClNO3 + HBr = BrCl + HNO3
<HET542> &      LossO3Cl & HOCl  + HBr = BrCl + H2O 
% Ozone loss via Br-Family
<G7101>  &  2.0 LossO3Br & BrO  + O3P      = Br + O2
<G7102a> &  2.0 LossO3Br & BrO  + BrO      = Br + Br
<G7102b> &  2.0 LossO3Br & BrO  + BrO      = Br2
<G7203>  &      LossO3Br & HOBr + O3P      = OH  + BrO
<G7301>  &      LossO3Br & BrO  + NO       = Br  + NO2
<G7402b> &      LossO3Br & BrO  + CH3O2    = Br + HCHO + HO2
<G7603b> &      LossO3Br & BrO  + ClO      = Br   + Cl
<G7603c> &      LossO3Br & BrO  + ClO      = BrCl
<J7200>  &      LossO3Br & HOBr + hv = Br + OH 
<HET510> &      LossO3Br & HOBr  + HBr = Br2 + H2O
<HET541> &      LossO3Br & BrNO3 + HCl = BrCl + HNO3
<HET543> &      LossO3Br & HOBr  + HCl = BrCl + H2O 
%
% op_vg_20100630-
%
% op_pg_20130122+
%budget analysis for short-lived halogens L=long-lived S=short-lived
%
%Cl
<G6404>       &  4.0  ProdLCl & CCl4 + O1D = ClO + 3 Cl :
<G6405>       &  1.0  ProdLCl & CH3Cl + O1D = OH + Cl :
<G6406>       &  1.0  ProdLCl & CH3Cl + OH  = H2O + Cl :
<G6407>       &  3.0  ProdLCl & CH3CCl3 + O1D = OH + 3 Cl :
<G6408>       &  3.0  ProdLCl & CH3CCl3 + OH  = H2O + 3 Cl :
<G6500>       &  2.0  ProdLCl & CF2Cl2 + O1D = ClO + Cl :
<G6501>       &  3.0  ProdLCl & CFCl3 + O1D = ClO + 2 Cl :
%
%Br
<G7403>        &  1.0  ProdLBr & CH3Br + OH = H2O + Br :
<G7407>        &  3.0  ProdSBr & CHBr3 + OH = H2O + 3 Br :
<G7408>        &  2.0  ProdSBr & CH2Br2 + OH = H2O + 2 Br :
%
%------------ no Cl-Production ----
<G7605>        &  1.0  ProdSBr & CHCl2Br + OH = H2O + Br :
<G7606>        &  2.0  ProdSBr & CHClBr2 + OH = H2O + 2 Br :
<G7607>        &  1.0  ProdSBr & CH2ClBr + OH = H2O + Br :
%------------                    ----
%
%Photolysis
%
%Cl
<J6400>        &  1.0  ProdLCl & CH3Cl + hv = Cl + CH3O2 :
<J6401>        &  4.0  ProdLCl & CCl4  + hv = 4 Cl  :
<J6402>        &  3.0  ProdLCl & CH3CCl3 + hv = 3 Cl :
<J6500>        &  3.0  ProdLCl & CFCl3 + hv = 3 Cl :
<J6501>        &  2.0  ProdLCl & CF2Cl2 + hv = 2 Cl :
%
%Br
<J7400>        &  1.0  ProdLBr & CH3Br + hv = Br + CH3O2 :
<J7401>        &  2.0  ProdSBr & CH2Br2 + hv = 2 Br :
<J7402>        &  3.0  ProdSBr & CHBr3 + hv = 3 Br :
<J7500>        &  1.0  ProdLBr & CF3Br + hv = Br :
%
%---Cl+Br
<J7601>        &  1.0  ProdLBr + 1.0 ProdLCl & CF2ClBr + hv = Br + Cl :
<J7602>        &  1.0  ProdSBr + 1.0 ProdSCl & CH2ClBr + hv = Br + Cl :
<J7603>        &  1.0  ProdSBr + 2.0 ProdSCl & CHCl2Br + hv = Br + 2 Cl :
<J7604>        &  2.0  ProdSBr + 1.0 ProdSCl & CHClBr2 + hv = 2 Br + Cl :
%
%I J8401 I-Production?
%
%op_pg_20130122-
%
% op_kg_20110601+
% diagnose HO2+NO
<G3201>    & 1.0  LossG3201    & NO + HO2 = NO2 + OH
% HO2+NO for Butkovskaya_dry.rpl
<G3201a>   & 1.0  LossG3201a   & NO + HO2 = NO2 + OH
<G3201aKG> & 1.0  LossG3201aKG & NO + HO2 = HNO3
% diagnose HO2+NO for Butkovskaya_wet.rpl
<G3201b>   & 1.0  LossG3201b   & NO + HO2 = NO2 + OH
<G3201bKG> & 1.0  LossG3201bKG & NO + HO2 = HNO3
% op_kg_20110601-
% op_kg_20111109+
% diagnose HOx, NOx for selected reactions individually (for studying HO2+NO=HNO3)
<G2104>    & 1.0  LossG2104    & OH + O3 = HO2
<G2106>    & 1.0  LossG2106    & HO2 + O3P = OH
<G2107>    & 1.0  LossG2107    & HO2 + O3 = OH
<G2110>    & 1.0  LossG2110    & HO2 + HO2 = H2O2
<G3103>    & 1.0  LossG3103    & NO + O3 = NO2 + O2
<G3105>    & 1.0  LossG3105    & NO2 + O3P = NO + O2
<G3106>    & 1.0  LossG3106    & NO2 + O3 = NO3 + O2
<G3202>    & 1.0  LossG3202    & NO2 + OH = HNO3
<G4110>    & 1.0  LossG4110    & CO + OH = H + CO2
<J3101>    & 1.0  LossJ3101    & NO2 + hv = NO + O
<J3103a>   & 1.0  LossJ3103a   & NO3 + hv = NO2 + O3P
% op_kg_20111109-
