# Supplementary material for: Oxidation of low-molecular weight organic compounds in clouddroplets: development of the JAMOC chemical mechanism inCAABA/MECCA (version 4.5.0gmdd)
Source: Copernicus journal article supplement (doi:10.5194/gmd-2020-337), 2020-10-29
Supplement: Supplementary file 20 [file gmd-2020-337-supplement.zip › caaba_4.5.0gmdd/mecca/diagtrac/old/halogen_budget.tex]

% mz_ak_20060518+
% Ozone budget
<G2107> & LossHO2        & HO2  + O3       = OH
<G2104> & LossOH         & OH   + O3       = HO2
<G2111> & LossO1D        & H2O  + O1D      = 2 OH 
<G3201> & ProdHO2        & NO   + HO2      = NO2   + OH
<G4104> & ProdMeO2       & CH3O2 + NO      = HCHO + NO2 + HO2
<G4204> & ProdRO2        & C2H5O2  + NO      = CH3CHO + HO2 + NO2
<G4212> & ProdRO2        & CH3CO3    + NO      = CH3O2 + NO2
<G4305> & 0.96 ProdRO2   & IC3H7O2  + NO      = .96 CH3COCH3 + .96 HO2 + .96 NO2 + .04 IC3H7NO3 
<G4309> & 0.98 ProdRO2   & LHOC3H6O2 + NO     = .98 CH3CHO + .98 HCHO + .98 HO2 + .98 NO2 + .02 LC4H9NO3
<G4313> & ProdRO2        & CH3COCH2O2  + NO    = NO2 + CH3CO3 + HCHO
<G4403> & ProdRO2        & LC4H9O2  + NO    = .84 NO2 + .56 MEK + .56 HO2 + .28 C2H5O2 + .84 CH3CHO + .16 LC4H9NO3
<G4408> & ProdRO2        & MVKO2   + NO    = NO2 + .25 CH3CO3 + .25 ACETOL + .75 HCHO + .25 CO + .75 HO2 + .5 MGLYOX
<G4415> & 0.985 ProdRO2  & LMEKO2   + NO    = .985 CH3CHO + .985 CH3CO3 + .985 NO2 + .015 LC4H9NO3 
<G4504> & 0.88 ProdRO2   & ISO2  + NO      = .88 NO2 + .88 MVK + .88 HCHO + .88 HO2 + .12 ISON
% Br source diagnostic
%% from hydrocarbons + OH
<G7403> & Brcoh    & CH3Br   + OH     = H2O + Br      
<G7403> & CH3Brcoh   & CH3Br   + OH     = H2O + Br      
<G7403> & Brorg      & CH3Br   + OH     = H2O + Br      
<G7407a> & CHBr3coh   & CHBr3   + OH     = H2O + 3 Br   
<G7407a> & 3 Brcoh  & CHBr3   + OH     = H2O + 3 Br   
<G7407a> & 3 Brorg  & CHBr3   + OH     = H2O + 3 Br   
<G7408a> & CH2Br2coh  & CH2Br2  + OH     = H2O + 2 Br   
<G7408a> & 2 Brcoh  & CH2Br2  + OH     = H2O + 2 Br   
<G7408a> & 2 Brorg  & CH2Br2  + OH     = H2O + 2 Br   
<G7606a> & CHClBr2coh & CHClBr2 + OH     = H2O + 2 Br   
<G7606a> & 2 Brcoh  & CHClBr2 + OH     = H2O + 2 Br   
<G7606a> & 2 Brorg  & CHClBr2 + OH     = H2O + 2 Br   
<G7605a> & CHCl2Brcoh & CHCl2Br + OH     = H2O + Br    
<G7605a> & Brcoh    & CHCl2Br + OH     = H2O + Br    
<G7605a> & Brorg      & CHCl2Br + OH     = H2O + Br    
<G7607a> & CH2ClBrcoh & CH2ClBr + OH     = H2O + Br    
<G7607a> & Brcoh    & CH2ClBr + OH     = H2O + Br    
<G7607a> & Brorg    & CH2ClBr + OH     = H2O + Br    
%% from hydrocarbons
<J7400a> & Brhcs          & CH3Br   + hv = Br + CH3O2
<J7400a> & CH3Brhcs   & CH3Br   + hv = Br + CH3O2
<J7400a> & Brorg          & CH3Br   + hv = Br + CH3O2
<J7401a> & CH2Br2hcs  & CH2Br2  + hv = 2 Br {+ CH3O2>  
<J7401a> & 2 Brhcs        & CH2Br2  + hv = 2 Br {+ CH3O2>  
<J7401a> & 2 Brorg        & CH2Br2  + hv = 2 Br {+ CH3O2>  
<J7402a> & CHBr3hcs   & CHBr3   + hv = 3 Br {+ CH3O2> 
<J7402a> & 3 Brhcs        & CHBr3   + hv = 3 Br {+ CH3O2> 
<J7402a> & 3 Brorg        & CHBr3   + hv = 3 Br {+ CH3O2> 
<J7500> & Brhcs          & CF3Br   + hv = Br     
<J7500> & Brorg          & CF3Br   + hv = Br     
<J7500> & CF3Brhcs   & CF3Br   + hv = Br     
<J7601> & Brhcs          & CF2ClBr + hv = Br + Cl 
<J7601> & Brorg          & CF2ClBr + hv = Br + Cl 
<J7601> & CF2ClBrhcs & CF2ClBr + hv = Br + Cl 
<J7602a> & CH2ClBrhcs & CH2ClBr + hv = Br + Cl      
<J7602a> & Brhcs          & CH2ClBr + hv = Br + Cl      
<J7602a> & Brorg          & CH2ClBr + hv = Br + Cl      
<J7603a> & CHCl2Brhcs & CHCl2Br + hv = Br + 2 Cl        
<J7603a> & Brhcs          & CHCl2Br + hv = Br + 2 Cl        
<J7603a> & Brorg          & CHCl2Br + hv = Br + 2 Cl        
<J7604a> & CHClBr2hcs & CHClBr2 + hv = 2 Br + Cl       
<J7604a> & 2 Brhcs        & CHClBr2 + hv = 2 Br + Cl       
<J7604a> & 2 Brorg        & CHClBr2 + hv = 2 Br + Cl       
<J6400> & Cldiag         & CH3Cl   + hv = Cl + CH3O2  
<G6100> & Clozone        & Cl + O3      = ClO    
%% released from seasalt
<H7000b_a01> & 2 BrSSrel     & Br2_a01         = Br2      
<H7000b_a01> & 2 Brsalt      & Br2_a01         = Br2      
<H7200b_a01> & BrSSrel       & HBr_a01         = HBr         
<H7200b_a01> & Brsalt        & HBr_a01         = HBr         
<H7201b_a01> & BrSSrel       & HOBr_a01        = HOBr   
<H7201b_a01> & Brsalt        & HOBr_a01        = HOBr   
<H7300_a01>  & BrSSrel       & N2O5  + Brm_a01 = BrNO2   + NO3m_a01
<H7300_a01>  & Brsalt        & N2O5  + Brm_a01 = BrNO2   + NO3m_a01
<H7600b_a01> & BrSSrel       & BrCl_a01        = BrCl    
<H7600b_a01> & Brsalt        & BrCl_a01        = BrCl    
%% captured by seasalt (only possible for _a01 chemistry only!
<H7000f_a01> & 2 BrSScap     & Br2            = Br2_a01    
<H7200f_a01> & BrSScap       & HBr            = HBr_a01    
<H7201f_a01> & BrSScap       & HOBr           = HOBr_a01      
<H7301_a01>  & BrSScap       & BrNO3          = HOBr_a01 + HNO3_a01
<H7302_a01>  & BrSScap       & BrNO3 + Brm_a01 = Br2_a01  + NO3m_a01
<H7600f_a01> & BrSScap       & BrCl           = BrCl_a01 
<H7602_a01>  & BrSScap       & BrNO3 + Clm_a01 = BrCl_a01 + NO3m_a01
% mz_ak_20060518-
