# Supplementary material for: Oxidation of low-molecular weight organic compounds in clouddroplets: development of the JAMOC chemical mechanism inCAABA/MECCA (version 4.5.0gmdd)
Source: Copernicus journal article supplement (doi:10.5194/gmd-2020-337), 2020-10-29
Supplement: Supplementary file 20 [file gmd-2020-337-supplement.zip › caaba_4.5.0gmdd/mecca/diagtrac/old/O3_budget.tex]

%mz_pj_20080320+
% O3 budget diagnostic
<G2107> & LossHO2        & HO2  + O3       = OH
<G2104> & LossOH         & OH   + O3       = HO2
<G2111> & LossO1D        & H2O  + O1D      = 2 OH 
<G3201> & ProdHO2        & NO   + HO2      = NO2   + OH
<G4104> & ProdMeO2       & CH3O2 + NO      = HCHO + NO2 + HO2
<G4204> & ProdRO2        & C2H5O2  + NO      = CH3CHO + HO2 + NO2
<G4212> & ProdRO2        & CH3CO3    + NO      = CH3O2 + NO2
<G4305> & 0.96 ProdRO2   & IC3H7O2  + NO      = .96 CH3COCH3 + .96 HO2 + .96 NO2 + .04 IC3H7NO3 
<G4309> & 0.98 ProdRO2   & LHOC3H6O2 + NO     = .98 CH3CHO + .98 HCHO + .98 HO2 + .98 NO2 + .02 LC4H9NO3
<G4313> & ProdRO2        & CH3COCH2O2  + NO    = NO2 + CH3CO3 + HCHO
<G4403> & ProdRO2        & LC4H9O2  + NO    = .84 NO2 + .56 MEK + .56 HO2 + .28 C2H5O2 + .84 CH3CHO + .16 LC4H9NO3
<G4408> & ProdRO2        & MVKO2   + NO    = NO2 + .25 CH3CO3 + .25 ACETOL + .75 HCHO + .25 CO + .75 HO2 + .5 MGLYOX
<G4415> & 0.985 ProdRO2  & LMEKO2   + NO    = .985 CH3CHO + .985 CH3CO3 + .985 NO2 + .015 LC4H9NO3 
<G4504> & 0.88 ProdRO2   & ISO2  + NO      = .88 NO2 + .88 MVK + .88 HCHO + .88 HO2 + .12 ISON
<G4504a> & 0.956 ProdRO2 & ISO2  + NO      = .956 NO2 + .956 MVK + .956 HCHO + .956 HO2 + .044 ISON
%mz_pj_20080320-
%
% op_vg_20100630+
% Ozone loss via O-Family
% Extension of Crutzen and Schmailzl, 1983
% ODD =     O + O1D + O3 
%       + ClO + ClOH +  Cl2O2
%       + NO2 + HNO3 + 2 NO3 + 3 N2O5 + HNO4
%       + PAN + NACA 
%       + 2 ClONO2 + HO2NO2
%       + BrO + HOBr + 2 BrONO2
<G1002>  &  2.0 LossO3O  & O3   + O1D      = 2 O2
<G1003>  &  2.0 LossO3O  & O3   + O3P      = 2 O2
<G2111>  &      LossO3O  & H2O  + O1D      = 2 OH
<G3102a> &      LossO3O  & N2O  + O1D      = 2 NO
<G3102aa> &     LossO3O  &                           % op_pj_20100723
<G3102b> &      LossO3O  & N2O  + O1D      = N2 + O2
<G3102bb> &     LossO3O  &                           % op_pj_20100723
%#
% Ozone loss via H-Family
<G2101>  &     LossO3H  & H    + O3       = OH
<G2102>  &     LossO3H  & H2   + O1D      = H + OH
<G2103>  &     LossO3H  & OH   + O3P      = H
<G2104>  &     LossO3H  & OH   + O3       = HO2
<G2106>  &     LossO3H  & HO2  + O3P      = OH
<G2107>  &     LossO3H  & HO2  + O3       = OH
<G2108c> & -1.0 LossO3H  & HO2  + H        = O3P + H2O
% Ozone loss via N-Family
<G3100>  & -1.0 LossO3N  & N    + O2       = NO + O3P
<G3104>  & -1.0 LossO3N  & NO   + N        = O3P + N2
<G3105>  &  2.0 LossO3N  & NO2  + O3P      = NO + O2
<G3204>  &      LossO3N  & NO3  + HO2      = NO2 + OH + O2
<G3205>  & -1.0 LossO3N  & HONO + OH       = NO2 + H2O
<G3206>  & -1.0 LossO3N  & HNO3 + OH       = H2O   + NO3
<G6300>  & -1.0 LossO3N  & ClO   + NO      = NO2 + Cl
<G7301>  & -1.0 LossO3N  & BrO  + NO       = Br  + NO2
<G4105>  &      LossO3N  & CH3O2   + NO3   = HCHO + HO2 + NO2
<G4109>  &      LossO3N  & HCHO    + NO3   = HNO3 + CO + HO2
<G4209>  &      LossO3N  & CH3CHO  + NO3   = CH3CO3 + HNO3
<G4214>  &      LossO3N  & CH3CO3  + NO3   = CH3O2 + NO2
<PSC200> &      LossO3N  &    N2O5 + H2O  = HNO3 + HNO3
<J3103b> &  2.0 LossO3N  & NO3     + hv    = NO
<G3105>  &  2.0 LossO3N2 & NO2  + O3P      = NO + O2
% Ozone loss via R-Family
<G4201>  &      LossO3R  & C2H4    + O3      = HCHO + .22 HO2 + .12 OH + .23 CO + .54 HCOOH + .1 H2
<G4301>  &      LossO3R  & C3H6    + O3      = .57 HCHO + .47 CH3CHO + .33 OH + .26 HO2 + .07 CH3O2 + .06 C2H5O2 + .23 CH3CO3 + .04 CH3COCHO + .06 CH4 + .31 CO + .22 HCOOH + .03 CH3OH
<G4405>  &      LossO3R  & MVK     + O3      = .45 HCOOH + .9 CH3COCHO + .1 CH3CO3 + .19 OH + .22 CO + .32 HO2
<G4500>  &      LossO3R  & C5H8  + O3        = .28 HCOOH + .65 MVK + .1 MVKO2  + .1 CH3CO3 + .14 CO + .58 HCHO + .09 H2O2 + .08 CH3O2 + .25 OH + .25 HO2
%
% Ozone loss via Cl-Family
%
<G6101>  &  2.0 LossO3Cl & ClO + O3P       = Cl
<G6201b> & -1.0 LossO3Cl & Cl + HO2        = ClO + OH
<G6203a> &      LossO3Cl & ClO + OH        = Cl  + HO2
<G6203b> &      LossO3Cl & ClO + OH        = HCl
<G6300>  &  1.0 LossO3Cl & ClO   + NO       = NO2 + Cl
<G6403>  &      LossO3Cl & ClO     + CH3O2  = HO2 + Cl + HCHO 
<G6405>  &      LossO3Cl & CH3Cl   + O1D    = OH + Cl {+...>
<G6405a> &      LossO3Cl &                                 % op_pj_20100723
%<G6405b> &      LossO3Cl &                                 % op_pj_20100723
<G6407>  &      LossO3Cl & CH3CCl3 + O1D    = OH + 3 Cl {+...>
<G6407a> &      LossO3Cl &                                 % op_pj_20100723
%<G6407b> &      LossO3Cl &                                 % op_pj_20100723
<G7603b> &      LossO3Cl & BrO  + ClO      = Br   + Cl
<G7603c> &      LossO3Cl & BrO  + ClO      = BrCl
<J6201>  &      LossO3Cl & HOCl    + hv = OH + Cl 
<PSC410> &      LossO3Cl & HOCl  + HCl = Cl2 + H2O
<PSC420> &      LossO3Cl & ClNO3 + HCl = Cl2 + HNO3 
<PSC540> &      LossO3Cl & ClNO3 + HBr = BrCl + HNO3
<PSC542> &      LossO3Cl & HOCl  + HBr = BrCl + H2O 
% Ozone loss via Br-Family
<G7101>  &  2.0 LossO3Br & BrO  + O3P      = Br + O2
<G7102a> &  2.0 LossO3Br & BrO  + BrO      = Br + Br
<G7102b> &  2.0 LossO3Br & BrO  + BrO      = Br2
<G7203>  &      LossO3Br & HOBr + O3P      = OH  + BrO
<G7301>  &      LossO3Br & BrO  + NO       = Br  + NO2
<G7402b> &      LossO3Br & BrO  + CH3O2    = Br + HCHO + HO2
<G7603b> &      LossO3Br & BrO  + ClO      = Br   + Cl
<G7603c> &      LossO3Br & BrO  + ClO      = BrCl
<J7200>  &      LossO3Br & HOBr + hv = Br + OH 
<PSC510> &      LossO3Br & HOBr  + HBr = Br2 + H2O
<PSC541> &      LossO3Br & BrNO3 + HCl = BrCl + HNO3
<PSC543> &      LossO3Br & HOBr  + HCl = BrCl + H2O 
%
% op_vg_20100630-
