# Supplementary material for: Oxidation of low-molecular weight organic compounds in clouddroplets: development of the JAMOC chemical mechanism inCAABA/MECCA (version 4.5.0gmdd)
Source: Copernicus journal article supplement (doi:10.5194/gmd-2020-337), 2020-10-29
Supplement: Supplementary file 20 [file gmd-2020-337-supplement.zip › caaba_4.5.0gmdd/mecca/diagtrac/old/o3orig.tex]

% O3 budget diagnostic
<G2107> & LossHO2        & HO2  + O3       = OH
<G2104> & LossOH         & OH   + O3       = HO2
<G2111> & LossO1D        & H2O  + O1D      = 2 OH 
<G3201> & ProdHO2        & NO   + HO2      = NO2   + OH
<G4104> & ProdMeO2       & CH3O2 + NO      = HCHO + NO2 + HO2
<G4204> & ProdRO2        & C2H5O2  + NO      = CH3CHO + HO2 + NO2
<G4212> & ProdRO2        & CH3CO3    + NO      = CH3O2 + NO2
<G4305> & 0.96 ProdRO2   & IC3H7O2  + NO      = .96 CH3COCH3 + .96 HO2 + .96 NO2 + .04 IC3H7NO3 
<G4309> & 0.98 ProdRO2   & LHOC3H6O2 + NO     = .98 CH3CHO + .98 HCHO + .98 HO2 + .98 NO2 + .02 LC4H9NO3
<G4313> & ProdRO2        & CH3COCH2O2  + NO    = NO2 + CH3CO3 + HCHO
<G4403> & ProdRO2        & LC4H9O2  + NO    = .84 NO2 + .56 MEK + .56 HO2 + .28 C2H5O2 + .84 CH3CHO + .16 LC4H9NO3
<G4408> & ProdRO2        & MVKO2   + NO    = NO2 + .25 CH3CO3 + .25 ACETOL + .75 HCHO + .25 CO + .75 HO2 + .5 MGLYOX
<G4415> & 0.985 ProdRO2  & LMEKO2   + NO    = .985 CH3CHO + .985 CH3CO3 + .985 NO2 + .015 LC4H9NO3 
<G4504> & 0.88 ProdRO2   & ISO2  + NO      = .88 NO2 + .88 MVK + .88 HCHO + .88 HO2 + .12 ISON
<G4504a> & 0.956 ProdRO2   & ISO2  + NO      = .956 NO2 + .956 MVK + .956 HCHO + .956 HO2 + .044 ISON
%
<J7100> & RJ7100         & BrO + hv  = Br + O3P
<G7101> & RG7101         & BrO + O3P = Br + O2  
<G7301> & RG7301         & BrO  + NO = Br  + NO2    
%
%% % O3 origin diagnostic
%% %   - production
 % Used program: prodloss.f90 (V. Grewe)
 % Input: equationfile gas_mim1.eqn
 % Family: O3 =
 %                   1.0  x O3
 %                +  1.0  x O3P
 %                +  1.0  x O1D
 %                +  1.0  x ClO
 %                +  1.0  x HOCl
 %                +  2.0  x Cl2O2
 %                +  1.0  x OClO
 %                +  1.0  x NO2
 %                +  1.0  x HNO3
 %                +  2.0  x NO3
 %                +  3.0  x N2O5
 %                +  1.0  x HNO4
 %                +  1.0  x PAN
 %                +  1.0  x NACA
 %                +  1.0  x MPAN
 %                +  1.0  x IC3H7NO3
 %                +  1.0  x LC4H9NO3
 %                +  1.0  x ISON
 %                +  2.0  x ClNO3
 %                +  1.0  x BrO
 %                +  1.0  x HOBr
 %                +  2.0  x BrNO3
 <G1002>        &  2.0  LossO3 & O3 + O1D = 2 O2 :
 <G1003>        &  2.0  LossO3 & O3 + O3P = 2 O2 :
 <G2101>        &  1.0  LossO3 & H + O3 = OH :
 <G2102>        &  1.0  LossO3 & H2 + O1D = H + OH :
 <G2103>        &  1.0  LossO3 & OH + O3P = H :
 <G2104>        &  1.0  LossO3 & OH + O3 = HO2 :
 <G2106>        &  1.0  LossO3 & HO2 + O3P = OH :
 <G2107>        &  1.0  LossO3 & HO2 + O3 = OH :
 <G2108c>       &  1.0  ProdO3 & HO2 + H = O3P + H2O :
 <G2111>        &  1.0  LossO3 & H2O + O1D = 2 OH :
 <G3100>        &  1.0  ProdO3 & N + O2 = NO + O3P :
 <G3102a>       &  1.0  LossO3 & N2O + O1D = 2 NO :
 <G3102b>       &  1.0  LossO3 & N2O + O1D = N2 + O2 :
 <G3104>        &  1.0  ProdO3 & NO + N = O3P + N2 :
 <G3105>        &  2.0  LossO3 & NO2 + O3P = NO + O2 :
 <G3201>        &  1.0  ProdO3 & NO + HO2 = NO2 + OH :
 <G3204>        &  1.0  LossO3 & NO3 + HO2 = NO2 + OH + O2 :
 <G3205>        &  1.0  ProdO3 & HONO + OH = NO2 + H2O :
 <G3206>        &  1.0  ProdO3 & HNO3 + OH = H2O + NO3 :
 <G4100>        &  1.0  LossO3 & CH4 + O1D = .75 CH3O2 + .75 OH + .25 HCHO + .4 H + .05 H2 :
 <G4104>        &  1.0  ProdO3 & CH3O2 + NO = HCHO + NO2 + HO2 :
 <G4105>        &  1.0  LossO3 & CH3O2 + NO3 = HCHO + HO2 + NO2 :
 <G4109>        &  1.0  LossO3 & HCHO + NO3 = HNO3 + CO + HO2 :
 <G4201>        &  1.0  LossO3 & C2H4 + O3 = HCHO + .22 HO2 + .12 OH + .23 CO + .54 HCOOH + .1 H2 :
 <G4204>        &  1.0  ProdO3 & C2H5O2 + NO = CH3CHO + HO2 + NO2 :
 <G4205>        &  1.0  LossO3 & C2H5O2 + NO3 = CH3CHO + HO2 + NO2 :
 <G4209>        &  1.0  LossO3 & CH3CHO + NO3 = CH3CO3 + HNO3 :
 <G4211b>       &  1.0  ProdO3 & CH3CO3 + HO2 = CH3CO2H + O3 :
 <G4212>        &  1.0  ProdO3 & CH3CO3 + NO = CH3O2 + NO2 :
 <G4214>        &  1.0  LossO3 & CH3CO3 + NO3 = CH3O2 + NO2 :
 <G4303>        &  1.0  LossO3 & C3H6 + NO3 = LC4H9NO3 :
 <G4305>        &  1.0  ProdO3 & IC3H7O2 + NO = .96 CH3COCH3 + .96 HO2 + .96 NO2 + .04 IC3H7NO3 :
 <G4309>        &  1.0  ProdO3 & LHOC3H6O2 + NO = .98 CH3CHO + .98 HCHO + .98 HO2 + .98 NO2 + .02 LC4H9NO3 :
 <G4313>        &  1.0  ProdO3 & CH3COCH2O2 + NO = NO2 + CH3CO3 + HCHO :
 <G4403>        &  1.0  ProdO3 & LC4H9O2 + NO = .84 NO2 + .56 MEK + .56 HO2 + .28 C2H5O2 + .28 CH3CHO + .16 LC4H9NO3 :
 <G4405>        &  1.0  LossO3 & MVK + O3 = .45 HCOOH + .9 MGLYOX + .1 CH3CO3 + .19 OH + .22 CO + .32 HO2 :
 <G4408>        &  1.0  ProdO3 & MVKO2 + NO = NO2 + .25 CH3CO3 + .25 ACETOL + .75 HCHO + .25 CO + .75 HO2 + .5 MGLYOX :
 <G4415>        &  1.0  ProdO3 & LMEKO2 + NO = .985 CH3CHO + .985 CH3CO3 + .985 NO2 + .015 LC4H9NO3 :
 <G4502>        &  1.0  LossO3 & C5H8 + NO3 = ISON :
 <G4504>        &  1.0  ProdO3 & ISO2 + NO = .88 NO2 + .88 MVK + .88 HCHO + .88 HO2 + .12 ISON :
 <G6101>        &  2.0  LossO3 & ClO + O3P = Cl :
 <G6201b>       &  1.0  ProdO3 & Cl + HO2 = ClO + OH :
 <G6203a>       &  1.0  LossO3 & ClO + OH = Cl + HO2 :
 <G6203b>       &  1.0  LossO3 & ClO + OH = HCl :
 <G6403>        &  1.0  LossO3 & ClO + CH3O2 = HO2 + Cl + HCHO :
 <G6405>        &  1.0  LossO3 & CH3Cl + O1D = OH + Cl {+...} :
 <G6407>        &  1.0  LossO3 & CH3CCl3 + O1D = OH + 3 Cl {+...} :
 <G7101>        &  2.0  LossO3 & BrO + O3P = Br + O2 :
 <G7102a>       &  2.0  LossO3 & BrO + BrO = Br + Br :
 <G7102b>       &  2.0  LossO3 & BrO + BrO = Br2 :
 <G7203>        &  1.0  LossO3 & HOBr + O3P = OH + BrO :
 <G7402b>       &  1.0  LossO3 & BrO + CH3O2 = Br + HCHO + HO2:
 <G7603a>       &  1.0  LossO3 & BrO + ClO = Br + OClO :
 <G7603b>       &  2.0  LossO3 & BrO + ClO = Br + Cl :
 <G7603c>       &  2.0  LossO3 & BrO + ClO = BrCl :
 <G8100>        &  1.0  LossO3 & I + O3 = IO + O2 :
 <G8300>        &  1.0  LossO3 & I + NO2 = INO2 {+M} :
 <G8301>        &  1.0  LossO3 & I + NO3 = IO + NO2 :
 <G8302>        &  1.0  ProdO3 & IO + NO = I + NO2 :
 <G8303>        &  1.0  LossO3 & IO + NO2 = INO3 {+M} :
 <G8304>        &  1.0  ProdO3 & OIO + NO = NO2 + IO :
 <G8305>        &  1.0  ProdO3 & INO2 = I + NO2 :
 <G8306>        &  1.0  ProdO3 & INO3 = IO + NO2 :
 <G8307>        &  2.0  LossO3 & I2 + NO3 = I + INO3 :
 <G8600>        &  1.0  LossO3 & IO + ClO = Cl + .14 OIO + .86 I + .86 O2 :
 <G8700>        &  1.0  LossO3 & I + BrO = IO + Br :
 <G8701>        &  1.0  LossO3 & IO + BrO = Br + .65 OIO + .35 I + .35 O2 :
 <G9401>        &  1.0  LossO3 & DMS + NO3 = CH3SO2 + HNO3 + HCHO {-O3}:
 <G9404>        &  1.0  LossO3 & CH3SO2 + O3 = CH3SO3 :
 <G9701>        &  1.0  LossO3 & DMS + BrO = DMSO + Br :
 <J1000>        &  2.0  ProdO3 & O2 + hv = O3P + O3P :
 <J3100>        &  1.0  ProdO3 & N2O + hv = O1D :
 <J3102>        &  1.0  ProdO3 & NO + hv = N + O3P :
 <J3103b>       &  2.0  LossO3 & NO3 + hv = NO :
 <J3202>        &  0.333  ProdO3 & HNO4 + hv = .667 NO2 + .667 HO2 + .333 NO3 + .333 OH :
 <J4102>        &  1.0  ProdO3 & CO2 + hv = CO + O3P :
 <J6100>        &  2.0  LossO3 & Cl2O2 + hv = 2 Cl :
 <J6101>        &  1.0  ProdO3 & OClO + hv = ClO + O3P :
 <J6201>        &  1.0  LossO3 & HOCl + hv = OH + Cl :
 <J6300>        &  1.0  ProdO3 & ClNO2 + hv = Cl + NO2 :
 <J7200>        &  1.0  LossO3 & HOBr + hv = Br + OH :
 <J7300>        &  1.0  ProdO3 & BrNO2 + hv = Br + NO2 :
 <J8100>        &  1.0  ProdO3 & IO + hv = I + O3P :
 <J8300>        &  1.0  ProdO3 & INO2 + hv = I + NO2 :
 <J8301>        &  2.0  ProdO3 & INO3 + hv = I + NO3 :
 <PSC200>       &  1.0  LossO3 & N2O5 + H2O = HNO3 + HNO3 :
 <PSC410>       &  1.0  LossO3 & HOCl + HCl = Cl2 + H2O :
 <PSC420>       &  1.0  LossO3 & ClNO3 + HCl = Cl2 + HNO3 :
 <PSC510>       &  1.0  LossO3 & HOBr + HBr = Br2 + H2O :
 <PSC540>       &  1.0  LossO3 & ClNO3 + HBr = BrCl + HNO3 :
 <PSC541>       &  1.0  LossO3 & BrNO3 + HCl = BrCl + HNO3 :
 <PSC542>       &  1.0  LossO3 & HOCl + HBr = BrCl + H2O :
 <PSC543>       &  1.0  LossO3 & HOBr + HCl = BrCl + H2O :
%%
%% % mz_ak_20060518+
%% % Br source diagnostic
%% %% from hydrocarbons + OH
%% <G7403> & CH3Brcoh   + Brcoh    & CH3Br   + OH     = H2O + Br      
%% <G7404> & CHBr3coh   + 3 Brcoh  & CHBr3   + OH     = H2O + 3 Br   
%% <G7405> & CH2Br2coh  + 2 Brcoh  & CH2Br2  + OH     = H2O + 2 Br   
%% <G7406> & CHClBr2coh + 2 Brcoh  & CHClBr2 + OH     = H2O + 2 Br   
%% <G7407> & CHCL2Brcoh + Brcoh    & CHCl2Br + OH     = H2O + Br    
%% <G7408> & CH2ClBrcoh + Brcoh    & CH2ClBr + OH     = H2O + Br    
%% %% from hydrocarbons
%% <J7400> & CH3Brhcs   + Brhcs          & CH3Br   + hv = Br + CH3O2
%% <J7401> & CH2Br2hcs  + 2 Brhcs        & CH2Br2  + hv = 2 Br {+ CH3O2}  
%% <J7402> & CHBr3hcs   + 3 Brhcs        & CHBr3   + hv = 3 Br {+ CH3O2} 
%% <J7500> & CF3Brhcs   + Brhcs          & CF3Br   + hv = Br     
%% <J7601> & CF2ClBrhcs + Brhcs          & CF2ClBr + hv = Br + Cl 
%% <J7602> & CH2ClBrhcs + Brhcs          & CH2ClBr + hv = Br + Cl      
%% <J7603> & CHCl2Brhcs + Brhcs          & CHCl2Br + hv = Br + 2 Cl        
%% <J7604> & CHClBr2hcs + 2 Brhcs        & CHClBr2 + hv = 2 Br + Cl       
%% <J6400> & Cldiag         & CH3Cl   + hv = Cl + CH3O2  
%% <G6100> & Clozone        & Cl + O3      = ClO    
%% %% released from seasalt
%% <H7000bcs> & 2 BrSSrel     & Br2_cs         = Br2      
%% <H7200bcs> & BrSSrel       & HBr_cs         = HBr         
%% <H7201bcs> & BrSSrel       & HOBr_cs        = HOBr   
%% <H7300cs>  & BrSSrel       & N2O5  + Brm_cs = BrNO2   + NO3m_cs
%% <H7600bcs> & BrSSrel       & BrCl_cs        = BrCl    
%% %% captured by seasalt (only possible for cs chemistry only!
%% <H7000fcs> & 2 BrSScap     & Br2            = Br2_cs    
%% <H7200fcs> & BrSScap       & HBr            = HBr_cs    
%% <H7201fcs> & BrSScap       & HOBr           = HOBr_cs      
%% <H7301cs>  & BrSScap       & BrNO3          = HOBr_cs + HNO3_cs
%% <H7302cs>  & BrSScap       & BrNO3 + Brm_cs = Br2_cs  + NO3m_cs
%% <H7600fcs> & BrSScap       & BrCl           = BrCl_cs 
%% <H7602cs>  & BrSScap       & BrNO3 + Clm_cs = BrCl_cs + NO3m_cs
%% % mz_ak_20060518-
%% %
%% % op_kg_20091208+ upper bound (for calculation of coefficients)
%%  <G3102a>  & LossN2O & N2O + O1D = 2 NO
%%  <G3102aa> & LossN2O & N2O + O1D = 2 NO      % op_pj_20100811
%%  <G3102b>  & LossN2O & N2O + O1D = N2 + O2
%%  <G3102bb> & LossN2O & N2O + O1D = N2 + O2   % op_pj_20100811
%%  <G3102c>  & LossN2O & N2O + O1D = 2 RNOy
%%  <G4100>   & LossCH4 & CH4 + O1D = .75 CH3O2 + .75 OH + .25 HCHO + .4 H + .05 H2
%%  <G4100a>  & LossCH4 & CH4 + O1D = .75 CH3O2 + .75 OH + .25 HCHO + .4 H + .05 H2 % op_pj_20100811
%%  <G4100b>  & LossCH4 & CH4 + O1D = 2 RH2O
%%  <G4101>   & LossCH4 & CH4 + OH  = CH3O2 + H2O
%%  <G4101a>  & LossCH4 & CH4 + OH  = CH3O2 + H2O  % op_pj_20100811
%%  <G4101b>  & LossCH4 & CH4 + OH  = 2 RH2O
%%  <G6400>   & LossCH4 & Cl  + CH4 = HCl + CH3O2
%%  <G6400a>  & LossCH4 & Cl  + CH4 = HCl + CH3O2  % op_pj_20100811
%%  <G6400b>  & LossCH4 & Cl  + CH4 = 2 RH2O
%%  <G6404>   & LossCFC & CCl4    + O1D    = ClO + 3 Cl {+...}
%%  <G6404a>  & LossCFC & CCl4    + O1D    = ClO + 3 Cl {+...} % op_pj_20100811
%%  <G6404b>  & LossCFC & CCl4    + O1D    = 4 RCly
%%  <G6405>   & LossCFC & CH3Cl   + O1D    = OH + Cl {+...}
%%  <G6405a>  & LossCFC & CH3Cl   + O1D    = OH + Cl {+...} % op_pj_20100811
%%  <G6405b>  & LossCFC & CH3Cl   + O1D    = RCly
%%  <G6406>   & LossCFC & CH3Cl   + OH     = H2O + Cl {+...}
%%  <G6406a>  & LossCFC & CH3Cl   + OH     = H2O + Cl {+...} % op_pj_20100811
%%  <G6406b>  & LossCFC & CH3Cl   + OH     = RCly
%%  <G6407>   & LossCFC & CH3CCl3 + O1D    = OH + 3 Cl {+...}
%%  <G6407a>  & LossCFC & CH3CCl3 + O1D    = OH + 3 Cl {+...}  % op_pj_20100811
%%  <G6407b>  & LossCFC & CH3CCl3 + O1D    = 3 RCly
%%  <G6408>   & LossCFC & CH3CCl3 + OH     = H2O + 3 Cl {+...}
%%  <G6408a>  & LossCFC & CH3CCl3 + OH     = H2O + 3 Cl {+...} % op_pj_20100811
%%  <G6408b>  & LossCFC & CH3CCl3 + OH     = 3 RCly
%%  <G6500>   & LossCFC & CF2Cl2  + O1D    = ClO + Cl {+...}
%%  <G6500a>  & LossCFC & CF2Cl2  + O1D    = ClO + Cl {+...} % op_pj_20100811
%%  <G6500b>  & LossCFC & CF2Cl2  + O1D    = 2 RCly
%%  <G6501>   & LossCFC & CFCl3   + O1D    = ClO + 2 Cl {+...}
%%  <G6501a>  & LossCFC & CFCl3   + O1D    = ClO + 2 Cl {+...} % op_pj_20100811
%%  <G6501b>  & LossCFC & CFCl3   + O1D    = 3 RCly
%%  <G7403>   & LossBrG & CH3Br + OH           = H2O + Br {+...}
%%  <G7403a>  & LossBrG & CH3Br + OH           = H2O + Br {+...} % op_pj_20100811
%%  <G7403b>  & LossBrG & CH3Br + OH           = RBr
%%  <J7400>   & LossBrJ & CH3Br    + hv {+...} = Br + CH3O2
%%  <J7400a>  & LossBrJ & CH3Br    + hv {+...} = Br + CH3O2 % op_pj_20100811
%%  <J7400b>  & LossBrJ & CH3Br    + hv {+...} = RBr
%%  <J7500>   & LossBrJ & CF3Br    + hv        = Br {+...}
%%  <J7500a>  & LossBrJ & CF3Br    + hv        = Br {+...} % op_pj_20100811
%%  <J7500b>  & LossBrJ & CF3Br    + hv        = RBr
%%  <J7601>   & LossBrJ & CF2ClBr  + hv        = Br + Cl {+...}
%%  <J7601a>  & LossBrJ & CF2ClBr  + hv        = Br + Cl {+...} % op_pj_20100811
%%  <J7601b>  & LossBrJ & CF2ClBr  + hv        = RBr
%%  <J3100>   & LossN2OJ & N2O     + hv        = O1D {+...}
%%  <J3100a>  & LossN2OJ & N2O     + hv        = O1D {+...} % op_pj_20100811
%%  <J3100b>  & LossN2OJ & N2O     + hv        = 2 RNOy
%%  <J4103>   & LossCH4J & CH4     + hv {+...} = CO + 0.31 H + 0.69 H2 + 1.155 H2O
%%  <J6400>   & LossCFCJ & CH3Cl   + hv {+...} = Cl + CH3O2
%%  <J6400a>  & LossCFCJ & CH3Cl   + hv {+...} = Cl + CH3O2 % op_pj_20100811
%%  <J6400b>  & LossCFCJ & CH3Cl   + hv {+...} = RCly
%%  <J6401>   & LossCFCJ & CCl4    + hv        = 4 Cl {+...}
%%  <J6401a>  & LossCFCJ & CCl4    + hv        = 4 Cl {+...} % op_pj_20100811
%%  <J6401b>  & LossCFCJ & CCl4    + hv        = 4 RCly
%%  <J6402>   & LossCFCJ & CH3CCl3 + hv        = 3 Cl {+...}
%%  <J6402a>  & LossCFCJ & CH3CCl3 + hv        = 3 Cl {+...} % op_pj_20100811
%%  <J6402b>  & LossCFCJ & CH3CCl3 + hv        = 3 RCly
%%  <J6500>   & LossCFCJ & CFCl3   + hv        = 3 Cl {+...}
%%  <J6500a>  & LossCFCJ & CFCl3   + hv        = 3 Cl {+...} % op_pj_20100811
%%  <J6500b>  & LossCFCJ & CFCl3   + hv        = 3 RCly
%%  <J6501>   & LossCFCJ & CF2Cl2  + hv        = 2 Cl {+...}
%%  <J6501a>  & LossCFCJ & CF2Cl2  + hv        = 2 Cl {+...} % op_pj_20100811
%%  <J6501b>  & LossCFCJ & CF2Cl2  + hv        = 2 RCly
%% % op_kg_20091208-
%
%% % op_vg_20100608+
%%  ClOx cycles
%%  Cl  + O3  -> ClO +O2
%%  ClO + O   -> Cl + O2
%%  ClO + NO  -> Cl + NO2  (Null cycle) 
%%
%%
%%  NOx cycles
%%  NO  + O3  ->  NO2 + O2
%%  NO2 + O   ->  NO  + O2
%%  NO2 + hv  ->  NO  + O   (Null cycle)
%%  NO2 + O3  ->  NO3 + O2
%%  NO3 + hv  ->  NO2 + O   (Null cycle)
%%
%% 
%%  BrOx cycles
%%  Br  + O3  ->  BrO  + O2
%%  BrO + O   ->  Br   + O2
%%  BrO + NO  ->  Br   + NO2  (Null Cycle)
%%    
%%
%%  HOx cycles 
%%
%%  OH  + O3   ->  HO2  +  O2   
%%  HO2 + O    ->  OH   +  O2
%%  HO2 + O    ->  OH   +  O2 
%%
%%  The others are ignored. (O3 + O, O+OH )
%%
%%
%%  RH - O3 loss
%%  C2H4    + O3      = Products
%%  C3H6    + O3      = Products
%%  MVK     + O3      = Products
%%  ISOP    + O3      = Products
%%
%%
%% Ozone loss via O-Family
%% Extension of Crutzen and Schmailzl, 1983
%% ODD =     O + O1D + O3 
%%       + ClO + ClOH +  Cl2O2
%%       + NO2 + HNO3 + 2 NO3 + 3 N2O5 + HNO4
%%       + PAN + NACA 
%%       + 2 ClONO2 + HO2NO2
%%       + BrO + HOBr + 2 BrONO2
%%
%% <G1002>   &  2.0 LossO3O  & O3   + O1D      = 2 O2
%% <G1003>   &  2.0 LossO3O  & O3   + O3P      = 2 O2
%% <G2111>   &      LossO3O  & H2O  + O1D      = 2 OH
%% <G3102a>  &      LossO3O  & N2O  + O1D      = 2 NO
%% <G3102aa> &      LossO3O  &                           % op_pj_20100723
%% <G3102b>  &      LossO3O  & N2O  + O1D      = N2 + O2
%% <G3102bb> &      LossO3O  &                           % op_pj_20100723
%% %#
%% % Ozone loss via H-Family
%% <G2101>  &     LossO3H  & H    + O3       = OH
%% <G2102>  &     LossO3H  & H2   + O1D      = H + OH
%% <G2103>  &     LossO3H  & OH   + O3P      = H
%% <G2104>  &     LossO3H  & OH   + O3       = HO2
%% <G2106>  &     LossO3H  & HO2  + O3P      = OH
%% <G2107>  &     LossO3H  & HO2  + O3       = OH
%% <G2108c> & -1.0 LossO3H  & HO2  + H        = O3P + H2O
%% % Ozone loss via N-Family
%% <G3100>  & -1.0 LossO3N  & N    + O2       = NO + O3P
%% <G3104>  & -1.0 LossO3N  & NO   + N        = O3P + N2
%% <G3105>  &  2.0 LossO3N  & NO2  + O3P      = NO + O2
%% <G3204>  &      LossO3N  & NO3  + HO2      = NO2 + OH + O2
%% <G3205>  & -1.0 LossO3N  & HONO + OH       = NO2 + H2O
%% <G3206>  & -1.0 LossO3N  & HNO3 + OH       = H2O   + NO3
%% <G6300>  & -1.0 LossO3N  & ClO   + NO      = NO2 + Cl
%% <G7301>  & -1.0 LossO3N  & BrO  + NO       = Br  + NO2
%% <G4105>  &      LossO3N  & CH3O2   + NO3   = HCHO + HO2 + NO2
%% <G4109>  &      LossO3N  & HCHO    + NO3   = HNO3 + CO + HO2
%% <G4209>  &      LossO3N  & CH3CHO  + NO3   = CH3CO3 + HNO3
%% <G4214>  &      LossO3N  & CH3CO3  + NO3   = CH3O2 + NO2
%% <PSC200> &      LossO3N  &    N2O5 + H2O  = HNO3 + HNO3
%% <J3103b> &  2.0 LossO3N  & NO3     + hv    = NO
%% <G3105>  &  2.0 LossO3N2 & NO2  + O3P      = NO + O2
%% % Ozone loss via R-Family
%% <G4201>  &      LossO3R  & C2H4    + O3      = HCHO + .22 HO2 + .12 OH + .23 CO + .54 HCOOH + .1 H2
%% <G4301>  &      LossO3R  & C3H6    + O3      = .57 HCHO + .47 CH3CHO + .33 OH + .26 HO2 + .07 CH3O2 + .06 C2H5O2 + .23 CH3CO3 + .04 CH3COCHO + .06 CH4 + .31 CO + .22 HCOOH + .03 CH3OH
%% <G4405>  &      LossO3R  & MVK     + O3      = .45 HCOOH + .9 CH3COCHO + .1 CH3CO3 + .19 OH + .22 CO + .32 HO2
%% <G4500>  &      LossO3R  & C5H8  + O3        = .28 HCOOH + .65 MVK + .1 MVKO2  + .1 CH3CO3 + .14 CO + .58 HCHO + .09 H2O2 + .08 CH3O2 + .25 OH + .25 HO2
%% %
%% % Ozone loss via Cl-Family
%% %
%% <G6101>  &  2.0 LossO3Cl & ClO + O3P       = Cl
%% <G6201b> & -1.0 LossO3Cl & Cl + HO2        = ClO + OH
%% <G6203a> &      LossO3Cl & ClO + OH        = Cl  + HO2
%% <G6203b> &      LossO3Cl & ClO + OH        = HCl
%% <G6300>  &  1.0 LossO3Cl & ClO   + NO       = NO2 + Cl
%% <G6403>  &      LossO3Cl & ClO     + CH3O2  = HO2 + Cl + HCHO 
%% <G6405>  &      LossO3Cl & CH3Cl   + O1D    = OH + Cl {+...}
%% <G6405a> &      LossO3Cl &                                 % op_pj_20100723
%% %<G6405b> &      LossO3Cl &                                 % op_pj_20100723
%% <G6407>  &      LossO3Cl & CH3CCl3 + O1D    = OH + 3 Cl {+...}
%% <G6407a> &      LossO3Cl &                                 % op_pj_20100723
%% %<G6407b> &      LossO3Cl &                                 % op_pj_20100723
%% <G7603b> &      LossO3Cl & BrO  + ClO      = Br   + Cl
%% <G7603c> &      LossO3Cl & BrO  + ClO      = BrCl
%% <J6201>  &      LossO3Cl & HOCl    + hv = OH + Cl 
%% <PSC410> &      LossO3Cl & HOCl  + HCl = Cl2 + H2O
%% <PSC420> &      LossO3Cl & ClNO3 + HCl = Cl2 + HNO3 
%% <PSC540> &      LossO3Cl & ClNO3 + HBr = BrCl + HNO3
%% <PSC542> &      LossO3Cl & HOCl  + HBr = BrCl + H2O 
%% % Ozone loss via Br-Family
%% <G7101>  &  2.0 LossO3Br & BrO  + O3P      = Br + O2
%% <G7102a> &  2.0 LossO3Br & BrO  + BrO      = Br + Br
%% <G7102b> &  2.0 LossO3Br & BrO  + BrO      = Br2
%% <G7203>  &      LossO3Br & HOBr + O3P      = OH  + BrO
%% <G7301>  &      LossO3Br & BrO  + NO       = Br  + NO2
%% <G7402b> &      LossO3Br & BrO  + CH3O2    = Br + HCHO + HO2
%% <G7603b> &      LossO3Br & BrO  + ClO      = Br   + Cl
%% <G7603c> &      LossO3Br & BrO  + ClO      = BrCl
%% <J7200>  &      LossO3Br & HOBr + hv = Br + OH 
%% <PSC510> &      LossO3Br & HOBr  + HBr = Br2 + H2O
%% <PSC541> &      LossO3Br & BrNO3 + HCl = BrCl + HNO3
%% <PSC543> &      LossO3Br & HOBr  + HCl = BrCl + H2O 
%
% op_vg_20100630-
% mz_ht_20110314+
% S(IV) -> S(VI) oxidation processes
%% <G9200> & Prod_SO4_g &  SO2    + OH    = H2SO4 + HO2 
% mz_ht_20110314-
