# Supplementary material for: Oxidation of low-molecular weight organic compounds in clouddroplets: development of the JAMOC chemical mechanism inCAABA/MECCA (version 4.5.0gmdd)
Source: Copernicus journal article supplement (doi:10.5194/gmd-2020-337), 2020-10-29
Supplement: Supplementary file 20 [file gmd-2020-337-supplement.zip › caaba_4.5.0gmdd/mecca/diagtrac/old/react4c.tex]

 % Automatically generated Prod and loss terms for the familly defined below
 % Used program: prodloss.f90 (V. Grewe)
 % Input: equationfile mecca.eqn
 % Family: O3 = 
 %                   1.  x O3
 %                +  1.  x O3P
 %                +  1.  x O1D
 %                +  1.  x ClO
 %                +  1.  x HOCl
 %                +  2.  x Cl2O2
 %                +  1.  x OClO
 %                +  1.  x NO2
 %                +  1.  x HNO3
 %                +  2.  x NO3
 %                +  3.  x N2O5
 %                +  1.  x HNO4
 %                +  1.  x PAN
 %                +  1.  x NACA
 %                +  1.  x MPAN
 %                +  1.  x IC3H7NO3
 %                +  1.  x LC4H9NO3
 %                +  1.  x ISON
 %                +  2.  x ClNO3
 %                +  1.  x BrO
 %                +  1.  x HOBr
 %                +  2.  x BrNO3
 %                +  1.  x SO2
 <G1002a>        &  2.  LossO3 & O3 + O1D = 2.0 LossO3O + 2. LossO3 + 2 O2 : 
 <G1003>         &  2.  LossO3 & O3 + O3P = 2.0 LossO3O + 2. LossO3 + 2 O2 : 
 <G2101>         &  1.  LossO3 & H + O3 = LossO3H + 1. LossO3 + OH + O2 : 
 <G2102>         &  1.  LossO3 & H2 + O1D = LossO3H + 1. LossO3 + H + OH : 
 <G2103>         &  1.  LossO3 & OH + O3P = LossO3H + 1. LossO3 + H + O2 : 
 <G2104>         &  1.  LossO3 & OH + O3 = 1.0 LossG2104 + LossO3H + LossOH + 1. LossO3 + HO2 + O2 : 
 <G2106>         &  1.  LossO3 & HO2 + O3P = 1.0 LossG2106 + LossO3H + 1. LossO3 + OH + O2 : 
 <G2107>         &  1.  LossO3 & HO2 + O3 = 1.0 LossG2107 + LossO3H + LossHO2 + 1. LossO3 + OH + 2 O2 : 
 <G2108c>        &  1.  ProdO3 & HO2 + H = LossO3Hn + 1. ProdO3 + O3P + H2O : 
 <G2111>         &  1.  LossO3 & H2O + O1D = LossO3O + LossO1D + 1. LossO3 + 2 OH : 
 <G3100>         &  1.  ProdO3 & N + O2 = LossO3Nn + 1. ProdO3 + NO + O3P : 
 <G3102a>        &  1.  LossO3 & N2O + O1D = LossO3O + 1. LossO3 + 2 NO : 
 <G3102b>        &  1.  LossO3 & N2O + O1D = LossO3O + 1. LossO3 + N2 + O2 : 
 <G3104>         &  1.  ProdO3 & NO + N = LossO3Nn + 1. ProdO3 + O3P + N2 : 
 <G3105>         &  2.  LossO3 & NO2 + O3P = 1.0 LossG3105 + 2.0 LossO3N2 + 2.0 LossO3N + 2. LossO3 + NO + O2 : 
 <G3201>         &  1.  ProdO3 & NO + HO2 = 1.0 LossG3201 + ProdHO2 + 1. ProdO3 + NO2 + OH : 
 <G3204>         &  1.  LossO3 & NO3 + HO2 = LossO3N + 1. LossO3 + NO2 + OH + O2 : 
 <G3205>         &  1.  ProdO3 & HONO + OH = LossO3Nn + 1. ProdO3 + NO2 + H2O : 
 <G3206>         &  1.  ProdO3 & HNO3 + OH = LossO3Nn + 1. ProdO3 + H2O + NO3 : 
 <G3210>         &  1.  LossO3 & NH2 + O3 = 1. LossO3 + NH2O + O2 : 
 <G3215>         &  1.  LossO3 & NH2 + NO2 = 1. LossO3 + N2O + H2O : 
 <G3216>         &  1.  LossO3 & NH2 + NO2 = 1. LossO3 + NH2O + NO : 
 <G3217>         &  1.  LossO3 & NH2O + O3 = 1. LossO3 + NH2 + O2 : 
 <G3221>         &  1.  LossO3 & HNO + NO2 = 1. LossO3 + HONO + NO : 
 <G4100>         &  1.  LossO3 & CH4 + O1D = 1. LossO3 + .75 CH3O2 + .75 OH + .25 HCHO + .4 H + .05 H2 : 
 <G4104>         &  1.  ProdO3 & CH3O2 + NO = ProdMeO2 + 1. ProdO3 + HCHO + NO2 + HO2 : 
 <G4105>         &  1.  LossO3 & CH3O2 + NO3 = LossO3N + 1. LossO3 + HCHO + HO2 + NO2 : 
 <G4109>         &  1.  LossO3 & HCHO + NO3 = LossO3N + 1. LossO3 + HNO3 + CO + HO2 : 
 <G4201>         &  1.  LossO3 & C2H4 + O3 = LossO3R + 1. LossO3 + HCHO + .63 CO + .13 HO2 + 0.23125 HCOOH + 0.13875 HCHO + 0.13875 H2O2 + .13 OH : 
 <G4204>         &  1.  ProdO3 & C2H5O2 + NO = ProdRO2 + 1. ProdO3 + CH3CHO + HO2 + NO2 : 
 <G4205>         &  1.  LossO3 & C2H5O2 + NO3 = 1. LossO3 + CH3CHO + HO2 + NO2 : 
 <G4209>         &  1.  LossO3 & CH3CHO + NO3 = LossO3N + 1. LossO3 + CH3CO3 + HNO3 : 
 <G4211b>        &  1.  ProdO3 & CH3CO3 + HO2 = 1. ProdO3 + CH3CO2H + O3 : 
 <G4212>         &  1.  ProdO3 & CH3CO3 + NO = ProdRO2 + 1. ProdO3 + CH3O2 + CO2 + NO2 : 
 <G4214>         &  1.  LossO3 & CH3CO3 + NO3 = LossO3N + 1. LossO3 + CH3O2 + NO2 + CO2 : 
 <G4301>         &  1.  LossO3 & C3H6 + O3 = LossO3R + 1. LossO3 + .57 HCHO + .47 CH3CHO + .33 OH + .26 HO2 + .07 CH3O2 + .06 C2H5O2 + .23 CH3CO3 + .04 MGLYOX + .06 CH4 + .31 CO + .22 HCOOH + .03 CH3OH : 
 <G4303>         &  1.  LossO3 & C3H6 + NO3 = 1. LossO3 + LC4H9NO3 : 
 <G4305>         &  1.  ProdO3 & IC3H7O2 + NO = ProdRO2 + 1. ProdO3 + .96 CH3COCH3 + .96 HO2 + .96 NO2 + .04 IC3H7NO3 : 
 <G4309>         &  1.  ProdO3 & LHOC3H6O2 + NO = ProdRO2 + 1. ProdO3 + .98 CH3CHO + .98 HCHO + .98 HO2 + .98 NO2 + .02 LC4H9NO3 : 
 <G4313>         &  1.  ProdO3 & CH3COCH2O2 + NO = ProdRO2 + 1. ProdO3 + CH3CO3 + HCHO + NO2 : 
 <G4403>         &  1.  ProdO3 & LC4H9O2 + NO = ProdRO2 + 1. ProdO3 + .84 NO2 + .56 MEK + .56 HO2 + .28 C2H5O2 + .28 CH3CHO + .16 LC4H9NO3 : 
 <G4405>         &  1.  LossO3 & MVK + O3 = LossO3R + 1. LossO3 + .45 HCOOH + .9 MGLYOX + .1 CH3CO3 + .19 OH + .22 CO + .32 HO2 : 
 <G4408>         &  1.  ProdO3 & MVKO2 + NO = ProdRO2 + 1. ProdO3 + NO2 + .25 CH3CO3 + .25 ACETOL + .75 HCHO + .25 CO + .75 HO2 + .5 MGLYOX : 
 <G4415>         &  1.  ProdO3 & LMEKO2 + NO = ProdRO2 + 1. ProdO3 + .985 CH3CHO + .985 CH3CO3 + .985 NO2 + .015 LC4H9NO3 : 
 <G4500>         &  1.  LossO3 & C5H8 + O3 = LossO3R + 1. LossO3 + .28 HCOOH + .65 MVK + .1 MVKO2 + .1 CH3CO3 + .14 CO + .58 HCHO + .09 H2O2 + .08 CH3O2 + .25 OH + .25 HO2 : 
 <G4502>         &  1.  LossO3 & C5H8 + NO3 = 1. LossO3 + ISON : 
 <G4504>         &  1.  ProdO3 & ISO2 + NO = ProdRO2 + 1. ProdO3 + .956 NO2 + .956 MVK + .956 HCHO + .956 HO2 + .044 ISON : 
 <G6101>         &  2.  LossO3 & ClO + O3P = 2.0 LossO3Cl + 2. LossO3 + Cl + O2 : 
 <G6102a>        &  2.  LossO3 & ClO + ClO = 2. LossO3 + Cl2 + O2 : 
 <G6102b>        &  2.  LossO3 & ClO + ClO = 2. LossO3 + 2 Cl + O2 : 
 <G6102c>        &  1.  LossO3 & ClO + ClO = 1. LossO3 + Cl + OClO : 
 <G6201b>        &  1.  ProdO3 & Cl + HO2 = LossO3Cln + 1. ProdO3 + ClO + OH : 
 <G6203>         &  1.  LossO3 & ClO + OH = LossO3Cl + 1. LossO3 + .94 Cl + .94 HO2 + .06 HCl + .06 O2 : 
 <G6403>         &  1.  LossO3 & ClO + CH3O2 = LossO3Cl + 1. LossO3 + HO2 + Cl + HCHO : 
 <G6405>         &  1.  LossO3 & CH3Cl + O1D = 1.0 ProdLCl + LossO3Cl + 1. LossO3 + OH + Cl : 
 <G6407>         &  1.  LossO3 & CH3CCl3 + O1D = 3.0 ProdLCl + LossO3Cl + 1. LossO3 + OH + 3 Cl : 
 <G7101>         &  2.  LossO3 & BrO + O3P = 2.0 LossO3Br + 2. LossO3 + Br + O2 : 
 <G7102a>        &  2.  LossO3 & BrO + BrO = 2.0 LossO3Br + 2. LossO3 + 2 Br + O2 : 
 <G7102b>        &  2.  LossO3 & BrO + BrO = 2.0 LossO3Br + 2. LossO3 + Br2 + O2 : 
 <G7203>         &  1.  LossO3 & HOBr + O3P = LossO3Br + 1. LossO3 + OH + BrO : 
 <G7204>         &  1.  ProdO3 & Br2 + OH = 1. ProdO3 + HOBr + Br : 
 <G7402b>        &  1.  LossO3 & BrO + CH3O2 = LossO3Br + 1. LossO3 + Br + HCHO + HO2 : 
 <G7603a>        &  1.  LossO3 & BrO + ClO = 1. LossO3 + Br + OClO : 
 <G7603b>        &  2.  LossO3 & BrO + ClO = LossO3Br + LossO3Cl + 2. LossO3 + Br + Cl + O2 : 
 <G7603c>        &  2.  LossO3 & BrO + ClO = LossO3Br + LossO3Cl + 2. LossO3 + BrCl + O2 : 
 <G9200>         &  1.  LossO3 & SO2 + OH = 1. LossO3 + H2SO4 + HO2 : 
 <G9401>         &  1.  LossO3 & DMS + NO3 = 1. LossO3 + CH3SO2 + HNO3 + HCHO : 
 <G9402>         &  0.6  ProdO3 & DMSO + OH = 0.6 ProdO3 + .6 SO2 + HCHO + .6 CH3O2 + .4 HO2 + .4 CH3SO3H : 
 <G9403>         &  1.  ProdO3 & CH3SO2 = 1. ProdO3 + SO2 + CH3O2 : 
 <G9404>         &  1.  LossO3 & CH3SO2 + O3 = 1. LossO3 + CH3SO3 : 
 <G9701>         &  1.  LossO3 & DMS + BrO = 1. LossO3 + DMSO + Br : 
 <J1000a>        &  2.  ProdO3 & O2 + hv = 2. ProdO3 + O3P + O3P : 
 <J3100>         &  1.  ProdO3 & N2O + hv = 1. ProdO3 + O1D + N2 : 
 <J3102a>        &  1.  ProdO3 & NO + hv = 1. ProdO3 + N + O3P : 
 <J3103b>        &  2.  LossO3 & NO3 + hv = 2.0 LossO3N + 2. LossO3 + NO + O2 : 
 <J3202>         &  0.333  ProdO3 & HNO4 + hv = 0.333 ProdO3 + .667 NO2 + .667 HO2 + .333 NO3 + .333 OH : 
 <J4102>         &  1.  ProdO3 & CO2 + hv = 1. ProdO3 + CO + O3P : 
 <J6100>         &  2.  LossO3 & Cl2O2 + hv = 2. LossO3 + 2 Cl : 
 <J6101>         &  1.  ProdO3 & OClO + hv = 1. ProdO3 + ClO + O3P : 
 <J6201>         &  1.  LossO3 & HOCl + hv = LossO3Cl + 1. LossO3 + OH + Cl : 
 <J6300>         &  1.  ProdO3 & ClNO2 + hv = 1. ProdO3 + Cl + NO2 : 
 <J7200>         &  1.  LossO3 & HOBr + hv = LossO3Br + 1. LossO3 + Br + OH : 
 <J7300>         &  1.  ProdO3 & BrNO2 + hv = 1. ProdO3 + Br + NO2 : 
 <J7301>         &  5.9604645E-8  ProdO3 & BrNO3 + hv = 0.85 Br + 0.85 NO3 + 0.15 BrO + 0.15 NO2 : 
 <HET200>        &  1.  LossO3 & N2O5 + H2O = LossO3N + 1. LossO3 + 2 HNO3 : 
 <HET201>        &  3.  LossO3 & N2O5 = 3. LossO3 + 2 NO3m_cs + 2 Hp_cs : 
 <HET410>        &  1.  LossO3 & HOCl + HCl = LossO3Cl + 1. LossO3 + Cl2 + H2O : 
 <HET420>        &  1.  LossO3 & ClNO3 + HCl = LossO3Cl + 1. LossO3 + Cl2 + HNO3 : 
 <HET422>        &  2.  LossO3 & N2O5 + HCl = 2. LossO3 + ClNO2 + HNO3 : 
 <HET510>        &  1.  LossO3 & HOBr + HBr = LossO3Br + 1. LossO3 + Br2 + H2O : 
 <HET540>        &  1.  LossO3 & ClNO3 + HBr = LossO3Cl + 1. LossO3 + BrCl + HNO3 : 
 <HET541>        &  1.  LossO3 & BrNO3 + HCl = LossO3Br + 1. LossO3 + BrCl + HNO3 : 
 <HET542>        &  1.  LossO3 & HOCl + HBr = LossO3Cl + 1. LossO3 + BrCl + H2O : 
 <HET543>        &  1.  LossO3 & HOBr + HCl = LossO3Br + 1. LossO3 + BrCl + H2O : 
