# Supplementary material for: Oxidation of low-molecular weight organic compounds in clouddroplets: development of the JAMOC chemical mechanism inCAABA/MECCA (version 4.5.0gmdd)
Source: Copernicus journal article supplement (doi:10.5194/gmd-2020-337), 2020-10-29
Supplement: Supplementary file 20 [file gmd-2020-337-supplement.zip › caaba_4.5.0gmdd/mecca/gas.eqn]

// ------------------------------- gas.eqn -----------------------------------
// Time-stamp: <2020-09-24 10:32:30 sander>
// ---------------------------------------------------------------------------

// This program is free software; you can redistribute it and/or
// modify it under the terms of the GNU General Public License
// as published by the Free Software Foundation; either version 2
// of the License, or (at your option) any later version.
//
// This program is distributed in the hope that it will be useful,
// but WITHOUT ANY WARRANTY; without even the implied warranty of
// MERCHANTABILITY or FITNESS FOR A PARTICULAR PURPOSE. See the
// GNU General Public License for more details.
//
// You should have received a copy of the GNU General Public License
// along with this program; if not, get it from:
// http://www.gnu.org/copyleft/gpl.html

// ---------------------------------------------------------------------------

// This file contains all gas-phase reactions of the MECCA chemistry module.
// Use the script 'xmecca' to select reactions and run kpp.

// Authors:
// - Rolf von Kuhlmann:
//   - Tropospheric hydrocarbon chemistry nmhc8.eqn from MATCH
// - Stefanie Meilinger (Nov 2002):
//   - Stratospheric heterogeneous chemistry
//   - Stratospheric Br chemistry from the Mainz Chemical Box Model
//   - Gas-phase reaction rates updated to JPL2000
// - Astrid Kerkweg (2003):
//   - Mbl halogen reactions from MISTRA (von Glasow et al. 2002) added
// - Rolf Sander (2002-...):
//   - Stratospheric gas-phase chemistry ECHAM4CHEM (Steil et al. 1998) added
//   - Reaction mechanisms merged, sorted, labeled, and maintained
//   - Gas-phase reaction rates updated to JPL2006
// - Franziska Koellner (2009):
//   - added uncertainties for reaction constants
// - Klaus-Dirk Gottschaldt (2011):
//   - added HO2 + NO = HNO3, which can be activated with butkovskaya_*.rpl
// - Domenico Taraborrelli (and Sergey Gromov):
//   - MOM organic chemistry: NMHCs, isoprene, terpenes, aromatics

// ---------------------------------------------------------------------------

// Monte-Carlo information:

// - The uncertainty factor, e.g. "{§1.13}" is placed directly behind
//   the value of the rate coefficient
// - Uncertainties refer to only one temperature, usually 298 K.
//   Uncertainties in the Temperature-dependencies are not considered

// ---------------------------------------------------------------------------

#INLINE F90_GLOBAL
  ! variable declarations from gas.eqn:
  ! --------------------------------------------------------------------------
  ! inorganic and C1 chemistry:
  REAL :: k_HO2_HO2, k_NO3_NO2, k_NO2_HO2, k_HNO3_OH, k_CH3OOH_OH, &
          k_CH3CO2H_OH, k_ClO_ClO, k_BrO_NO2, k_I_NO2, k_DMS_OH, k_CH2OO_SO2
  REAL :: k_O3s ! used in some *.rpl files
  ! new methane chemistry:
  REAL :: beta_null_CH3NO3, beta_inf_CH3NO3, beta_CH3NO3, &
          k_NO2_CH3O2, k_CH2OO_NO2, beta_C2H5NO3, k_C6H5O2_NO2
  ! NO2+OH from Amedro et al., ref3491:
  REAL :: k_NO2_OH, alpha_HOONO, k_NO2_OH_lpl, k_NO2_OH_hpl, k_NO2_OH_logF
  ! --------------------------------------------------------------------------
  ! only for mim1, see mim1.rpl:
  REAL :: k_PrO2_HO2, k_PrO2_NO, k_PrO2_CH3O2
  REAL :: k0_NO_HO2, k1d_NO_HO2, k1w_NO_HO2, k2d_NO_HO2, k2w_NO_HO2, &
          alpha_NO_HO2, beta_NO_HO2, f_BrO_CH3O2
  ! end of mim1 block
  ! --------------------------------------------------------------------------
  ! organic chemistry (MIM, MAM, MOM...):
  REAL :: k_CH3CO3_NO2, k_PAN_M
  REAL(dp) :: KRO2NO, KAPHO2, KAPNO, KRO2NO3, KNO3AL, KDEC
  ! maximum number of C atoms the rate coefficients are calculated for:
  REAL :: k_hsb, k_hsd, k_16hs, k_16hsz14, k_16hsz41, k_15hsdhb, k_14hsal, &
          k_15hs24vynal, k_15hs42vynal, k_hydec
  REAL :: j_IC3H7NO3, j_ACETOL, j_HPALD, j_ketene
  REAL(dp) :: RO2      ! sum of peroxy radicals
  REAL(dp) :: k_CH3O2   ! CH3O2 self-reaction
  REAL(dp) :: k_RO2RCO3, k_RO2pRO2, k_RO2sRO2, k_RO2tRO2, &
              k_RO2pORO2, k_RO2sORO2, k_RO2tORO2, &
              k_RO2LISOPACO2, k_RO2ISOPBO2, k_RO2ISOPDO2
  REAL(dp) :: k_CH2CHOH_OH_HCOOH, k_CH2CHOH_OH_ALD, k_CH2CHOH_HCOOH, k_ALD_HCOOH
  REAL(dp) :: k1_RO2RCO3, k1_RO2pRO2, k1_RO2sRO2, k1_RO2tRO2, &
              k1_RO2pORO2, k1_RO2sORO2, k1_RO2tORO2, &
              k1_RO2LISOPACO2, k1_RO2ISOPBO2, k1_RO2ISOPDO2
  REAL(dp), PARAMETER :: k_C6H5O_NO2  = 2.08E-12 ! ref3172
  REAL(dp), PARAMETER :: k_C6H5O_O3   = 2.86E-13 ! ref3171
  ! SAR for OH reactions (ref3030 with introduction of temperature dependency)
  ! parameters for the SAR on H-abstraction OH:
  REAL(dp) :: k_p, k_s, k_t, k_ROHRO, k_CO2H, k_ROOHRO
  REAL(dp), PARAMETER :: &
    f_sOH = 3.44, f_tOH = 2.68, &
    f_sOOH = 8.,  f_tOOH = 8., &
    f_ONO2 = 0.04 , f_CH2ONO2 = 0.2, &
    f_cpan= 0.25, f_allyl = 3.6, f_alk= 1.23, &
    f_CHO = 0.55, f_CO2H = 1.67, f_CO = 0.73, &
    f_O = 8.15, f_pCH2OH = 1.29, f_tCH2OH = 0.53
  ! parameters for the SAR on OH-addtion to alkenes
  ! Note for ach2ooh calculated
  ! assuming RO2 distribution in ref3159
  ! B, E, D, F, AC are 0.41, 0.02, 0.22, 0.05, 0.30 respectively
  REAL(dp) :: k_adp, k_ads, k_adt
  REAL(dp), PARAMETER :: &
    k_adsecprim = 3.0E-11, k_adtertprim = 5.7E-11 &
   , a_PAN = 0.56      , a_CHO = 0.31   , a_COCH3 = 0.76 &
   , a_CH2ONO2 = 0.64  , a_CH2OH = 1.7  , a_CH2OOH = 1.7 &
   , a_COH = 2.2       , a_COOH = 2.2   , a_CO2H = 0.25
  ! Branching ratios for RO2 + HO2 reactions
  ! CH3CO3 + HO2 has unique branching ratios (see reaction)
  ! beta-hydroxy acyl peroxy radicals, e.g. HOCH2CO3
  ! (Groß, PhD Thesis, ref3195)
  REAL(dp), PARAMETER :: r_CO3_OH  = 0.69, r_CO3_O3  = 0.10, r_CO3_OOH = 0.21
  ! beta-keto peroxy radicals equal or bigger than CH3COCHO2CH3 (Dillon and Crowley, ref3192)
  REAL(dp), PARAMETER :: r_COCH2O2_OH  = 0.15, r_COCH2O2_OOH = 0.85
  REAL(dp), PARAMETER :: r_CHOHCH2O2_OH = 0.10 ! derived from Liu ref3193 for ISOPBO2 and ISOPDO2. Consistent with exp. data by C. Groß (MPIC)
  REAL(dp), PARAMETER :: r_CH2OCH2O2_OH  = 0.4 ! ref3175 for CH3OCH2O2
  REAL(dp), PARAMETER :: r_BIPERO2_OH = 0.40 ! ref3188 for toluene
  REAL(dp), PARAMETER :: f_HPAL = 0.5 ! HPALD-yield after 1,6-H-shift
  ! --------------------------------------------------------------------------
  ! Parameters included for acid-base equilibria calculation
  ! used to enable the double use of the aqueous.eqn for liquid
  ! and aerosol phase.
  REAL(dp), PARAMETER :: &
    f_equil_HO2     = 1.e5_dp, f_equil_HONO    = 1.e5_dp,  &
    f_equil_HNO3    = 1.e7_dp, f_equil_HNO4    = 1.e5_dp,  &
    f_equil_HCOOH   = 1.e5_dp, f_equil_SO2     = 1.e9_dp,  &
    f_equil_HSO3m   = 1.e9_dp, f_equil_HSO4m   = 1.e7_dp,  &
    f_equil_NH3     = 1.e7_dp, f_equil_H2O     = 1.e9_dp,  &
    f_equil_CO2     = 1.e5_dp, f_equil_CH3CO2H = 25.e9_dp, &
    f_equil_HCl     = 1.e2_dp, f_equil_HBr     = 1.e6_dp,  &
    f_equil_HOCl    = 1.e2_dp, f_equil_HOBr    = 1.e2_dp,  &
    f_equil_ICl     = 1.e2_dp, f_equil_IBr     = 1.e2_dp,  &
    f_equil_IClBr   = 1.e2_dp, f_equil_H2SO4   = 1.e7_dp
#ENDINLINE {above lines go to messy_mecca_kpp_global}

#INLINE F90_RCONST
  ! start of executable statements
  ! define some rate constants here if the expressions are too long
  ! for kpp or if they are used more than once
  ! --------------------------------------------------------------------------
  ! inorganic and C1 chemistry:
  k_HO2_HO2    = (3.0E-13*EXP(460./temp)+2.1E-33*EXP(920./temp)*cair)* &
                 (1.+1.4E-21*EXP(2200./temp)*C(ind_H2O))
  k_NO3_NO2    = k_3rd(temp,cair,2.4E-30,3.0,1.6E-12,-0.1,0.6){§1.1}
  k_NO2_HO2    = k_3rd(temp,cair,1.9E-31,3.4,4.0E-12,0.3,0.6){§1.06}
  k_HNO3_OH    = 1.32E-14*EXP(527./temp) + 1./ & ! "All data" in Tab. 1 of ref3325
                 ( 1./(7.39E-32*EXP(453./temp)*cair) + &
                 1./(9.73E-17*EXP(1910./temp)) ){§1.15} ! 15 % ref3325, p. 2389
  k_CH3OOH_OH  = 5.3E-12*EXP(190./temp){§§0.30}
  k_CH3CO2H_OH = 4.0E-14*EXP(850./temp)
  k_ClO_ClO    = k_3rd(temp,cair,1.9E-32,3.6,3.7E-12,1.6,0.6){§1.15}
  k_BrO_NO2    = k_3rd_iupac(temp,cair,4.7E-31{§§0.1},3.1,1.8E-11{§§0.1},0.0,0.4)
  ! JPL: k_BrO_NO2   = k_3rd(temp,cair,5.2E-31,3.2,6.9E-12,2.9,0.6)
  k_I_NO2      = k_3rd_iupac(temp,cair,3.0E-31{§§0.2},1.0,6.6E-11{§§0.3},0.0,0.63)
  ! for numerical reasons, the expression is multiplied by 1e30/1e30
  k_DMS_OH     = 1.E-9*EXP(5820./temp)*C(ind_O2)/ &
                 (1.E30+5.*EXP(6280./temp)*C(ind_O2)){§§0.30}
  k_CH2OO_SO2  = 3.66E-11{§} ! average of 3.9E-11 + 3.42E-11
  k_O3s = (1.7E-12*EXP(-940./temp)) * C(ind_OH) &  ! <G2104>
        + (1.E-14*EXP(-490./temp)) * C(ind_HO2) &  ! <G2107>
        + jx(ip_O1D) * 2.2E-10 * C(ind_H2O) &      !
        / ( 3.2E-11*EXP(70./temp)*C(ind_O2)   &
           + 1.8E-11*EXP(110./temp)*C(ind_N2) &
           + 2.2E-10*C(ind_H2O) )
  ! new methane chemistry:
  ! branching ratio for methyl nitrate according to Butkovskaya et al.,
  ! (ref3177) but reduced according to Flocke et al. (ref3164)
  ! fit of data according to Lindemann-Hinshelwood scheme by J. Crowley
  ! http://iupac.pole-ether.fr/datasheets/pdf/ROO_1_CH3O2_NO.pdf
  beta_null_CH3NO3 = 0.00295 + 5.15E-22*cair*(temp/298)**(7.4)
  beta_inf_CH3NO3  = 0.022
  beta_CH3NO3      = (beta_null_CH3NO3 * beta_inf_CH3NO3) /&
                     (beta_null_CH3NO3 + beta_inf_CH3NO3) / 10.
  k_NO2_CH3O2      = k_3rd(temp,cair,1.0E-30,4.8,7.2E-12,2.1,0.6){§1.5}
  k_C6H5O2_NO2     = k_NO2_CH3O2 ! Consistent with ref3167 that set 1E-12 as lower limit at 298 K and 1 bar.
  k_CH2OO_NO2          = 4.25E-12{§} ! average of 7.E-12 and 1.5E-12
  ! branching ratio for ethylnitrate formation according to Butkovskaya ref3170
  ! ratio transformed from beta = k1b/k1a to beta_C2H5NO3 = (1-(1+beta)^(-1))
  beta_C2H5NO3    = (1-1/(1+1.E-2*(3.88e-3*cair/2.46e19*760.+.365)*(1+1500.*(1/temp -1/298.))))
  ! --------------------------------------------------------------------------
  ! only for mim1, see mim1.rpl:
  ! op_kg_20110805+ for HO2 + NO -> HNO3 (butkovskaya_*.rpl)
  alpha_NO_HO2 = C(ind_H2O)*6.6E-27*temp*EXP(3700./temp)
  beta_NO_HO2  = MAX(((530./temp)+(press*4.8004E-6)-1.73)*0.01,0._dp)
  k0_NO_HO2    = 3.5E-12*EXP(250./temp)
  ! without humidity correction
  k2d_NO_HO2   = (beta_NO_HO2*k0_NO_HO2)/(1.+beta_NO_HO2)
  k1d_NO_HO2   = k0_NO_HO2 - k2d_NO_HO2
  ! with humidity correction
  k2w_NO_HO2   = (beta_NO_HO2*k0_NO_HO2*(1.+42.*alpha_NO_HO2))/ &
                 ((1.+alpha_NO_HO2)*(1.+beta_NO_HO2))
  k1w_NO_HO2   = k0_NO_HO2 - k2w_NO_HO2
  ! op_kg_20110805-
  k_PrO2_HO2   = 1.9E-13*EXP(1300./temp)
  k_PrO2_NO    = 2.7E-12*EXP(360./temp)
  k_PrO2_CH3O2 = 9.46E-14*EXP(431./temp)
  f_BrO_CH3O2 = 0.8{§1.25}/1.1 ! 0.8+/-0.2
  ! end of mim1 block
  ! --------------------------------------------------------------------------
  ! NO2 + OH:
  ! branching ratio:
  alpha_HOONO = ((3.3E-20*(temp/300.)**(-4.4))*cair * 0.29) / &
                ((3.3E-20*(temp/300.)**(-4.4))*cair + 0.29) * &
                10**(LOG10(0.39)/(1+(LOG10((3.3E-20*(temp/300.)**(-4.4)) &
                *cair/0.29)/(0.75-1.27*LOG10(0.39)))**(2.0)))+0.035
  ! low-pressure limit:
  k_NO2_OH_lpl = C(ind_N2)  *  2.6E-30*(temp/300.)**(-3.6) + &
                 C(ind_O2)  *  2.0E-30*(temp/300.)**(-3.6) + &
                 C(ind_H2O) * 15.9E-30*(temp/300.)**(-3.4)
  ! high-pressure limit:
  k_NO2_OH_hpl = 6.3E-11
  ! broadening factor:
  k_NO2_OH_logF = log10(0.39) / &
                  (1.+(log10(k_NO2_OH_lpl/k_NO2_OH_hpl)/(0.75-1.27*log10(0.39)))**2)
  ! rate constant:
  k_NO2_OH = ((k_NO2_OH_lpl*k_NO2_OH_hpl) / (k_NO2_OH_lpl+k_NO2_OH_hpl)) * &
             10.**(k_NO2_OH_logF)
  ! --------------------------------------------------------------------------
  k_CH3CO3_NO2 = k_3rd(temp,cair,9.7E-29,5.6,9.3E-12,1.5,0.6){§1.2}
  k_PAN_M      = k_CH3CO3_NO2/(9.0E-29{§1.2}*EXP(14000./temp))
  ! rate coefficients from the MCM:
  KDEC    = 1.E6 ! moved here from parameters to avoid renaming to k_dec 
                 ! required by medina parser for parameters
  KRO2NO  = 2.54E-12{§}*EXP(360./temp)
  KAPNO   = 8.10E-12{§}*EXP(270./temp)  ! CH3CO3 + NO
  KRO2NO3 = 2.30E-12{§} ! ref2419
  KNO3AL  = 1.4E-12{§1.3}*EXP(-1900./temp)
  ! updated rate constant for the RCO3+HO2 reactions
  ! (Groß, PhD Thesis, ref3195)
  ! except CH3CO3+HO2 that is taken from Groß ref3156
  KAPHO2  = 5.20E-13*EXP(980./temp)*1.865 ! at 298K k(hoch2co3 + ho2) = 2.6(+-0.4)E-11 scaled with IUPAC T-dependent expression
  ! Rate constants for the permutation reaction formalism
  ! calculated as in the permutation reaction formalism of MCM
  ! k_RO2 = 2.*(KRO2self*k_CH3O2)^0.5
  ! k_RO2self are taken from IUPAC recommendations unless noted otherwise
  k_CH3O2     = 1.03E-13{§§0.12}*EXP(365./temp) ! CH3O2 + CH3O2 (IUPAC)
  ! Acyl peroxy radicals
  k_RO2RCO3   = 2.*2.E-12{§§0.15}*EXP(500./temp) ! K17 for the CH3CO3 + CH3O2 reaction directly taken from ref. 1759. Old MCM value 1.00E-11 at 298 K.
  ! Alkyl radicals (unsubstituted, > C3)
  k_RO2pRO2   = 2.*(1.E-12{§}*k_CH3O2)**(.5)                      ! Model compound (CH3)2CHCH2O2 (isobutyl, ref3210). Old MCM value 1.30E-12 at 298 K.
  k_RO2sRO2   = 2.*(1.6E-12{§§0.3}*EXP(-2200./temp)*k_CH3O2)**(.5)! Model compound i-C3H7O2 (ref3175). Old MCM value 2.50E-13 at 298 K.
  k_RO2tRO2   = 2.*3.8E-13{§§0.6}*EXP(-1430./temp)                ! Model reaction t-C4H9O2 + CH3O2. Old MCM value 6.70E-15 at 298 K.
  ! Alkyl radical with either O or Cl in beta
  k_RO2pORO2  = 2.*7.5E-13{§}*EXP(500./temp)                      ! Model reaction CH3COCH2O2 + CH3O2 (ref3175). Old MCM value 2.00E-12
  k_RO2sORO2  = 2.*(7.7E-15{§§0.2}*EXP(1330./temp)*k_CH3O2)**(.5) ! Model compound CH3CH(OH)CH(O2)CH3 (ref3175). Old MCM value 8.80E-13 at 298 K.
  k_RO2tORO2  = 2.*(4.7E-13{§}*EXP(-1420./temp)*k_CH3O2)**(.5)    ! Model compound (CH3)2C(OH)CO2(CH3)2 (ref3175). Old MCM value 9.20E-14 at 298 K.
  ! Allyl- and beta-hydroxy alkyl radicals
  k_RO2LISOPACO2 = 2.*((2.8E-12{§}+3.9E-12{§})/2.*k_CH3O2)**(.5)  ! Model compound ISOPAO2 and ISOPCO2. Old MCM value 2.0E-12 at 298 K. K15 average from MCM ref. 2419
  k_RO2ISOPBO2   = 2.*(6.9E-14{§}*k_CH3O2)**(.5)                  ! Model compound ISOPBO2. Old MCM value 8.0E-13 at 298 K. K15 from MCM ref. 2419
  k_RO2ISOPDO2   = 2.*(4.8E-12{§}*k_CH3O2)**(.5)                  ! Model compound ISOPDO2. Old MCM value 8.0E-13 at 298 K. K15 from MCM ref. 2419
  ! T-dependent H-abstraction group rate constants
  k_p          = 4.49E-18{§}*temp*temp*EXP(-320./temp) ! Kwok and Atkinson, ref3194
  k_s          = 4.50E-18{§}*temp*temp*EXP(253./temp)  ! Kwok and Atkinson, ref3194
  k_t          = 2.12E-18{§}*temp*temp*EXP(696./temp)  ! Kwok and Atkinson, ref3194
  k_ROHRO      = 2.1E-18{§}*temp*temp*EXP(-85./temp)   ! Kwok and Atkinson, ref3194
  k_ROOHRO     = 0.6*k_CH3OOH_OH
  k_CO2H       = 0.7*k_CH3CO2H_OH
  ! T-dependent OH-addition rate constants
  k_adp        = 4.5E-12{§}*(temp/300.)**(-0.85)                        ! 1/2 k(OH + C2H4), high pressure limit IUPAC as in Peeters et al. 2007
  k_ads        = 0.25{§}*(1.1E-11*EXP(485./temp)+1.0E-11*EXP(553./temp)) ! 1/2 * k_av(OH + cis/trans 2-butene) as in Peeters et al. 2007
  k_adt        = 1.922E-11{§}*EXP(450./temp) - k_ads                    ! k(OH + 2-methyl-2-butene) - k_ads
  k_hsb         = 1.52E11{§}*EXP(-9512./temp)*1. ! 1,5-H-shift Peeters et al(2009) 0.003533 s-1 at 303K
  k_hsd         = 6.08E10{§}*EXP(-8893./temp)*1. ! 1,5-H-shift Peeters et al(2009) 0.0109 s-1 at 303K
  ! 1,6-H-shift for ZISOPAO2 and ZISOPCO2
  k_16hsz14     = 2.28E9{§} * exp(-6764/temp) * 0.28 ! 0.07035 s-1 at 295K ! as in SI Taraborrelli et al., Nat. Geosc. 2012
  k_16hsz41     = 1.23E9{§} * exp(-6186/temp) * 0.28 ! 0.2692 s-1 at 295K
  k_16hs        = (k_16hsz14*k_16hsz41)**(.5)
  k_15hsdhb     = 5.                             ! 1,5-H-shift assisted by double H-bonding after Peeters and Müller(2010)
  ! 1,4-H-shift involving an aldehydic hydrogen
  k_14hsal = 2.9E7{§}*exp(-5297/temp) ! Crounse ref3331 barrier 19 kcal/mol => ~ 0.5 s-1 at 295K
  !k_14hsal      = 2.9E7{§}*exp(-1*(5297+705)/temp) ! CCSD(T)/aug-Schartz4(DT)//M05-2X/6-311G(d,p)) yields a barrier of 20.39 (L. Vereecken 2013) => ~ 0.04 s-1 at 295K
  k_15hs24vynal = k_16hsz14 * exp(-3500/(1.987*temp)) ! adding 3.5 kcal to the barrier of 1,6-H-shift as from SAR by L. Vereecken
  k_15hs42vynal = k_16hsz41 * exp(-3500/(1.987*temp))
  k_hydec       = 6.e14{§}*exp(-16000./(1.98588*temp)) ! in cal Ea from Nguyen et al(2009) A from Baulch et al(2005)
  ! Rate constants for the formic acid production via vinyl alcohol. Also used for some bigger and saturated aldehydes.
  k_CH2CHOH_OH_HCOOH = 4.3E-11{§} ! ref3179
  k_CH2CHOH_OH_ALD   = 2.4E-11{§} ! ref3179
  k_CH2CHOH_HCOOH    = 4.67E-26*(temp)**(3.286)*EXP(4509./(1.987*temp)){§} ! ref3162
  k_ALD_HCOOH        = 1.17E-19*(temp)**(1.209)*EXP(-556./(1.987*temp)){§} ! ref3162
  j_IC3H7NO3   = 3.7*jx(ip_PAN)
  j_ACETOL     = 0.65*0.11*jx(ip_CHOH)
  j_HPALD      = (jx(ip_CH3OOH)+ jx(ip_MACR)/(2.*1.95E-3)) ! mcm.leeds.ac.uk/MCM/parameters/photolysis.htt
  j_ketene     = jx(ip_MVK)/0.004

  RO2 = 0.
  IF (ind_LISOPACO2>0)            RO2 = RO2 + C(ind_LISOPACO2)
  IF (ind_LDISOPACO2>0)           RO2 = RO2 + C(ind_LDISOPACO2)
  IF (ind_ISOPBO2>0)              RO2 = RO2 + C(ind_ISOPBO2)
  IF (ind_ISOPDO2>0)              RO2 = RO2 + C(ind_ISOPDO2)
  IF (ind_LISOPEFO2>0)            RO2 = RO2 + C(ind_LISOPEFO2)
  IF (ind_NISOPO2>0)              RO2 = RO2 + C(ind_NISOPO2)
  IF (ind_LHC4ACCO3>0)            RO2 = RO2 + C(ind_LHC4ACCO3)
  IF (ind_LC578O2>0)              RO2 = RO2 + C(ind_LC578O2)
  IF (ind_C59O2>0)                RO2 = RO2 + C(ind_C59O2)
  IF (ind_LNISO3>0)               RO2 = RO2 + C(ind_LNISO3)
  IF (ind_CH3O2>0)                RO2 = RO2 + C(ind_CH3O2)
  IF (ind_HOCH2O2>0)              RO2 = RO2 + C(ind_HOCH2O2)
  IF (ind_CH3CO3>0)               RO2 = RO2 + C(ind_CH3CO3)
  IF (ind_C2H5O2>0)               RO2 = RO2 + C(ind_C2H5O2)
  IF (ind_HOCH2CO3>0)             RO2 = RO2 + C(ind_HOCH2CO3)
  IF (ind_HYPROPO2>0)             RO2 = RO2 + C(ind_HYPROPO2)
  IF (ind_LBUT1ENO2>0)            RO2 = RO2 + C(ind_LBUT1ENO2)
  IF (ind_BUT2OLO2>0)             RO2 = RO2 + C(ind_BUT2OLO2)
  IF (ind_HCOCO3>0)               RO2 = RO2 + C(ind_HCOCO3)
  IF (ind_CO2H3CO3>0)             RO2 = RO2 + C(ind_CO2H3CO3)
  IF (ind_LHMVKABO2>0)            RO2 = RO2 + C(ind_LHMVKABO2)
  IF (ind_MACO3>0)                RO2 = RO2 + C(ind_MACO3)
  IF (ind_MACRO2>0)               RO2 = RO2 + C(ind_MACRO2)
  IF (ind_PRONO3BO2>0)            RO2 = RO2 + C(ind_PRONO3BO2)
  IF (ind_HOCH2CH2O2>0)           RO2 = RO2 + C(ind_HOCH2CH2O2)
  IF (ind_CH3COCH2O2>0)           RO2 = RO2 + C(ind_CH3COCH2O2)
  IF (ind_IC3H7O2>0)              RO2 = RO2 + C(ind_IC3H7O2)
  IF (ind_NC3H7O2>0)              RO2 = RO2 + C(ind_NC3H7O2)
  IF (ind_LC4H9O2>0)              RO2 = RO2 + C(ind_LC4H9O2)
  IF (ind_TC4H9O2>0)              RO2 = RO2 + C(ind_TC4H9O2)
  IF (ind_LMEKO2>0)               RO2 = RO2 + C(ind_LMEKO2)
  IF (ind_HCOCH2O2>0)             RO2 = RO2 + C(ind_HCOCH2O2)
  IF (ind_EZCH3CO2CHCHO>0)        RO2 = RO2 + C(ind_EZCH3CO2CHCHO)
  IF (ind_EZCHOCCH3CHO2>0)        RO2 = RO2 + C(ind_EZCHOCCH3CHO2)
  IF (ind_CH3COCHO2CHO>0)         RO2 = RO2 + C(ind_CH3COCHO2CHO)
  IF (ind_HCOCO2CH3CHO>0)         RO2 = RO2 + C(ind_HCOCO2CH3CHO)
  IF (ind_C1ODC3O2C4OOH>0)        RO2 = RO2 + C(ind_C1ODC3O2C4OOH)
  IF (ind_C1OOHC2O2C4OD>0)        RO2 = RO2 + C(ind_C1OOHC2O2C4OD)
  IF (ind_C1ODC2O2C4OD>0)         RO2 = RO2 + C(ind_C1ODC2O2C4OD)
  IF (ind_ISOPBDNO3O2>0)          RO2 = RO2 + C(ind_ISOPBDNO3O2)
  IF (ind_LISOPACNO3O2>0)         RO2 = RO2 + C(ind_LISOPACNO3O2)
  IF (ind_DB1O2>0)                RO2 = RO2 + C(ind_DB1O2)
  IF (ind_DB2O2>0)                RO2 = RO2 + C(ind_DB2O2)
  IF (ind_LME3FURANO2>0)          RO2 = RO2 + C(ind_LME3FURANO2)
  IF (ind_NO3CH2CO3>0)            RO2 = RO2 + C(ind_NO3CH2CO3)
  IF (ind_CH3COCO3>0)             RO2 = RO2 + C(ind_CH3COCO3)
  IF (ind_LZCO3C23DBCOD>0)        RO2 = RO2 + C(ind_LZCO3C23DBCOD)
  IF (ind_IBUTOLBO2>0)            RO2 = RO2 + C(ind_IBUTOLBO2)
  IF (ind_IPRCO3>0)               RO2 = RO2 + C(ind_IPRCO3)
  IF (ind_IC4H9O2>0)              RO2 = RO2 + C(ind_IC4H9O2)
  ! MBO-related
  IF (ind_LMBOABO2>0)             RO2 = RO2 + C(ind_LMBOABO2)
  IF (ind_IPRHOCO3>0)             RO2 = RO2 + C(ind_IPRHOCO3)
  IF (ind_LNMBOABO2>0)            RO2 = RO2 + C(ind_LNMBOABO2)
  IF (ind_NC4OHCO3>0)             RO2 = RO2 + C(ind_NC4OHCO3)
  ! APINENE-related:
  IF (ind_LAPINABO2>0)            RO2 = RO2 + C(ind_LAPINABO2)
  IF (ind_C96O2>0)                RO2 = RO2 + C(ind_C96O2)
  IF (ind_C97O2>0)                RO2 = RO2 + C(ind_C97O2)
  IF (ind_C98O2>0)                RO2 = RO2 + C(ind_C98O2)
  IF (ind_C85O2>0)                RO2 = RO2 + C(ind_C85O2)
  IF (ind_C86O2>0)                RO2 = RO2 + C(ind_C86O2)
  IF (ind_PINALO2>0)              RO2 = RO2 + C(ind_PINALO2)
  IF (ind_C96CO3>0)               RO2 = RO2 + C(ind_C96CO3)
  IF (ind_C89CO3>0)               RO2 = RO2 + C(ind_C89CO3)
  IF (ind_C85CO3>0)               RO2 = RO2 + C(ind_C85CO3)
  IF (ind_OHMENTHEN6ONEO2>0)      RO2 = RO2 + C(ind_OHMENTHEN6ONEO2)
  IF (ind_C511O2>0)               RO2 = RO2 + C(ind_C511O2)
  IF (ind_C106O2>0)               RO2 = RO2 + C(ind_C106O2)
  IF (ind_CO235C6CO3>0)           RO2 = RO2 + C(ind_CO235C6CO3)
  IF (ind_CHOC3COCO3>0)           RO2 = RO2 + C(ind_CHOC3COCO3)
  IF (ind_CO235C6O2>0)            RO2 = RO2 + C(ind_CO235C6O2)
  IF (ind_C716O2>0)               RO2 = RO2 + C(ind_C716O2)
  IF (ind_C614O2>0)               RO2 = RO2 + C(ind_C614O2)
  IF (ind_HCOCH2CO3>0)            RO2 = RO2 + C(ind_HCOCH2CO3)
  IF (ind_BIACETO2>0)             RO2 = RO2 + C(ind_BIACETO2)
  IF (ind_CO23C4CO3>0)            RO2 = RO2 + C(ind_CO23C4CO3)
  IF (ind_C109O2>0)               RO2 = RO2 + C(ind_C109O2)
  IF (ind_C811CO3>0)              RO2 = RO2 + C(ind_C811CO3)
  IF (ind_C89O2>0)                RO2 = RO2 + C(ind_C89O2)
  IF (ind_C812O2>0)               RO2 = RO2 + C(ind_C812O2)
  IF (ind_C813O2>0)               RO2 = RO2 + C(ind_C813O2)
  IF (ind_C721CO3>0)              RO2 = RO2 + C(ind_C721CO3)
  IF (ind_C721O2>0)               RO2 = RO2 + C(ind_C721O2)
  IF (ind_C722O2>0)               RO2 = RO2 + C(ind_C722O2)
  IF (ind_C44O2>0)                RO2 = RO2 + C(ind_C44O2)
  IF (ind_C512O2>0)               RO2 = RO2 + C(ind_C512O2)
  IF (ind_C513O2>0)               RO2 = RO2 + C(ind_C513O2)
  IF (ind_CHOC3COO2>0)            RO2 = RO2 + C(ind_CHOC3COO2)
  IF (ind_C312COCO3>0)            RO2 = RO2 + C(ind_C312COCO3)
  IF (ind_HOC2H4CO3>0)            RO2 = RO2 + C(ind_HOC2H4CO3)
  IF (ind_LNAPINABO2>0)           RO2 = RO2 + C(ind_LNAPINABO2)
  IF (ind_C810O2>0)               RO2 = RO2 + C(ind_C810O2)
  IF (ind_C514O2>0)               RO2 = RO2 + C(ind_C514O2)
  IF (ind_CHOCOCH2O2>0)           RO2 = RO2 + C(ind_CHOCOCH2O2)
  ! BPINENE-related:
  IF (ind_ROO6R1O2>0)             RO2 = RO2 + C(ind_ROO6R1O2)
  IF (ind_ROO6R3O2>0)             RO2 = RO2 + C(ind_ROO6R3O2)
  IF (ind_RO6R1O2>0)              RO2 = RO2 + C(ind_RO6R1O2)
  IF (ind_RO6R3O2>0)              RO2 = RO2 + C(ind_RO6R3O2)
  IF (ind_BPINAO2>0)              RO2 = RO2 + C(ind_BPINAO2)
  IF (ind_C8BCO2>0)               RO2 = RO2 + C(ind_C8BCO2)
  IF (ind_NOPINDO2>0)             RO2 = RO2 + C(ind_NOPINDO2)
  IF (ind_LNBPINABO2>0)           RO2 = RO2 + C(ind_LNBPINABO2)
  ! aromatics-related:
  IF (ind_BZBIPERO2>0)            RO2 = RO2 + C(ind_BZBIPERO2)
  IF (ind_C6H5CH2O2>0)            RO2 = RO2 + C(ind_C6H5CH2O2)
  IF (ind_TLBIPERO2>0)            RO2 = RO2 + C(ind_TLBIPERO2)
  IF (ind_BZEMUCCO3>0)            RO2 = RO2 + C(ind_BZEMUCCO3)
  IF (ind_BZEMUCO2>0)             RO2 = RO2 + C(ind_BZEMUCO2)
  IF (ind_C5DIALO2>0)             RO2 = RO2 + C(ind_C5DIALO2)
  IF (ind_NPHENO2>0)              RO2 = RO2 + C(ind_NPHENO2)
  IF (ind_PHENO2>0)               RO2 = RO2 + C(ind_PHENO2)
  IF (ind_CRESO2>0)               RO2 = RO2 + C(ind_CRESO2)
  IF (ind_NCRESO2>0)              RO2 = RO2 + C(ind_NCRESO2)
  IF (ind_TLEMUCCO3>0)            RO2 = RO2 + C(ind_TLEMUCCO3)
  IF (ind_TLEMUCO2>0)             RO2 = RO2 + C(ind_TLEMUCO2)
  IF (ind_C615CO2O2>0)            RO2 = RO2 + C(ind_C615CO2O2)
  IF (ind_MALDIALCO3>0)           RO2 = RO2 + C(ind_MALDIALCO3)
  IF (ind_EPXDLCO3>0)             RO2 = RO2 + C(ind_EPXDLCO3)
  IF (ind_C3DIALO2>0)             RO2 = RO2 + C(ind_C3DIALO2)
  IF (ind_MALDIALO2>0)            RO2 = RO2 + C(ind_MALDIALO2)
  IF (ind_C6H5O2>0)               RO2 = RO2 + C(ind_C6H5O2)
  IF (ind_C6H5CO3>0)              RO2 = RO2 + C(ind_C6H5CO3)
  IF (ind_OXYL1O2>0)              RO2 = RO2 + C(ind_OXYL1O2)
  IF (ind_C5CO14O2>0)             RO2 = RO2 + C(ind_C5CO14O2)
  IF (ind_NBZFUO2>0)              RO2 = RO2 + C(ind_NBZFUO2)
  IF (ind_BZFUO2>0)               RO2 = RO2 + C(ind_BZFUO2)
  IF (ind_HCOCOHCO3>0)            RO2 = RO2 + C(ind_HCOCOHCO3)
  IF (ind_CATEC1O2>0)             RO2 = RO2 + C(ind_CATEC1O2)
  IF (ind_MCATEC1O2>0)            RO2 = RO2 + C(ind_MCATEC1O2)
  IF (ind_C5DICARBO2>0)           RO2 = RO2 + C(ind_C5DICARBO2)
  IF (ind_NTLFUO2>0)              RO2 = RO2 + C(ind_NTLFUO2)
  IF (ind_TLFUO2>0)               RO2 = RO2 + C(ind_TLFUO2)
  IF (ind_NPHEN1O2>0)             RO2 = RO2 + C(ind_NPHEN1O2)
  IF (ind_NNCATECO2>0)            RO2 = RO2 + C(ind_NNCATECO2)
  IF (ind_NCATECO2>0)             RO2 = RO2 + C(ind_NCATECO2)
  IF (ind_NBZQO2>0)               RO2 = RO2 + C(ind_NBZQO2)
  IF (ind_PBZQO2>0)               RO2 = RO2 + C(ind_PBZQO2)
  IF (ind_NPTLQO2>0)              RO2 = RO2 + C(ind_NPTLQO2)
  IF (ind_PTLQO2>0)               RO2 = RO2 + C(ind_PTLQO2)
  IF (ind_NCRES1O2>0)             RO2 = RO2 + C(ind_NCRES1O2)
  IF (ind_MNNCATECO2>0)           RO2 = RO2 + C(ind_MNNCATECO2)
  IF (ind_MNCATECO2>0)            RO2 = RO2 + C(ind_MNCATECO2)
  IF (ind_MECOACETO2>0)           RO2 = RO2 + C(ind_MECOACETO2)
  IF (ind_CO2H3CO3>0)             RO2 = RO2 + C(ind_CO2H3CO3)
  IF (ind_MALANHYO2>0)            RO2 = RO2 + C(ind_MALANHYO2)
  IF (ind_NDNPHENO2>0)            RO2 = RO2 + C(ind_NDNPHENO2)
  IF (ind_DNPHENO2>0)             RO2 = RO2 + C(ind_DNPHENO2)
  IF (ind_NDNCRESO2>0)            RO2 = RO2 + C(ind_NDNCRESO2)
  IF (ind_DNCRESO2>0)             RO2 = RO2 + C(ind_DNCRESO2)
  IF (ind_C5CO2OHCO3>0)           RO2 = RO2 + C(ind_C5CO2OHCO3)
  IF (ind_C6CO2OHCO3>0)           RO2 = RO2 + C(ind_C6CO2OHCO3)
  IF (ind_MMALANHYO2>0)           RO2 = RO2 + C(ind_MMALANHYO2)
  IF (ind_ACCOMECO3>0)            RO2 = RO2 + C(ind_ACCOMECO3)
  IF (ind_C4CO2DBCO3>0)           RO2 = RO2 + C(ind_C4CO2DBCO3)
  IF (ind_C5CO2DBCO3>0)           RO2 = RO2 + C(ind_C5CO2DBCO3)
  IF (ind_NSTYRENO2>0)            RO2 = RO2 + C(ind_NSTYRENO2)
  IF (ind_STYRENO2>0)             RO2 = RO2 + C(ind_STYRENO2)
  ! pseudo first order rate constants    ! occurence
  k1_RO2RCO3      = RO2 * k_RO2RCO3      ! 51
  k1_RO2pRO2      = RO2 * k_RO2pRO2      ! 5
  k1_RO2sRO2      = RO2 * k_RO2sRO2      ! 11+1
  k1_RO2tRO2      = RO2 * k_RO2tRO2      ! 13+1
  k1_RO2pORO2     = RO2 * k_RO2pORO2     ! 11+2
  k1_RO2sORO2     = RO2 * k_RO2sORO2     ! 33+2
  k1_RO2tORO2     = RO2 * k_RO2tORO2     ! 17
  k1_RO2LISOPACO2 = RO2 * k_RO2LISOPACO2 ! 3
  k1_RO2ISOPBO2   = RO2 * k_RO2ISOPBO2   ! 1
  k1_RO2ISOPDO2   = RO2 * k_RO2ISOPDO2   ! 13
#ENDINLINE {above lines go into the SUBROUTINES UPDATE_RCONST and UPDATE_PHOTO}

// don't forget to add the F90_RATES functions also to
// KPP_SUBROUTINE_LIST in messy/tools/kp4/bin/kp4.sh
#INLINE F90_RATES
  ELEMENTAL REAL(dp) FUNCTION k_SIV_H2O2 (k_298,tdep,cHp,temp)
    ! special rate function for S(IV) + H2O2
    REAL,     INTENT(IN) :: k_298 ! k at T = 298.15K
    REAL,     INTENT(IN) :: tdep  ! temperature dependence
    REAL(dp), INTENT(IN) :: cHp   ! c(H+)
    REAL(dp), INTENT(IN) :: temp  ! temperature
    INTRINSIC :: EXP
    k_SIV_H2O2 = k_298 * EXP(tdep*(1._dp/temp-3.3540E-3_dp)) &
      * cHp / (cHp+0.1_dp)
  END FUNCTION k_SIV_H2O2

  ELEMENTAL REAL(dp) FUNCTION k_3rd_iupac(temp,cair,k0_300K,n,kinf_300K,m,fc)
    ! IUPAC three body reaction formula (iupac.pole-ether.fr)
    INTRINSIC :: LOG10
    REAL(dp), INTENT(IN) :: temp      ! temperature [K]
    REAL(dp), INTENT(IN) :: cair      ! air concentration [molecules/cm3]
    REAL,     INTENT(IN) :: k0_300K   ! low pressure limit at 300 K
    REAL,     INTENT(IN) :: n         ! exponent for low pressure limit
    REAL,     INTENT(IN) :: kinf_300K ! high pressure limit at 300 K
    REAL,     INTENT(IN) :: m         ! exponent for high pressure limit
    REAL,     INTENT(IN) :: fc        ! broadening factor (e.g. 0.45 or 0.6...)
    REAL                 :: nu        ! N
    REAL                 :: zt_help, k0_T, kinf_T, k_ratio

    zt_help = 300._dp/temp
    k0_T    = k0_300K   * zt_help**(n) * cair ! k_0   at current T
    kinf_T  = kinf_300K * zt_help**(m)        ! k_inf at current T
    k_ratio = k0_T/kinf_T
    nu      = 0.75-1.27*LOG10(fc)
    k_3rd_iupac = k0_T/(1._dp+k_ratio)* &
      fc**(1._dp/(1._dp+(LOG10(k_ratio)/nu)**2))
  END FUNCTION k_3rd_iupac

  ELEMENTAL REAL(dp) FUNCTION alpha_AN(n,ro2type,bcarb,gcarb,abic,temp,cair)
  ! Alkyl nitrate yields dependent on T and P according to
  ! Arey. ref3202 and Teng, ref3189
    INTRINSIC :: LOG10
    INTEGER,  INTENT(IN) :: n         ! number of heavy atoms (C, O, N) except the O atom of beta-carbonyls
    INTEGER,  INTENT(IN) :: ro2type   ! 1, 2 or 3 for primary, secondary and tertiary RO2
    INTEGER,  INTENT(IN) :: bcarb     ! 1 for beta-carbonyl group, 0 for none
    INTEGER,  INTENT(IN) :: gcarb     ! 1 for gamma-carbonyl group, 0 for none
    INTEGER,  INTENT(IN) :: abic      ! 1 for bicyclic peroxy from aromatics, 0 for none
    REAL(dp), INTENT(IN) :: temp      ! temperature [K]
    REAL(dp), INTENT(IN) :: cair      ! air concentration [molecules/cm3]
    REAL(dp), PARAMETER  :: alpha=2.E-22, beta=1.0, Yinf_298K=0.43, F=0.41, m0=0., minf=8.0
    REAL(dp)             :: m           ! factor for primary, secondary and tertiary RO2
    REAL(dp)             :: bcf,gcf,abf ! reduction factors for the presence of beta-carbonyl and gamma-carbonyl group and a bicyclic peroxy from aromatics
    REAL(dp)             :: Y0_298K, Y0_298K_tp, Yinf_298K_t, zeta, k_ratio

    m = 1. ! According to Teng, ref3189
    IF (bcarb .EQ. 1) THEN
      bcf = 0.19 ! derived from Praske, ref3190: alpha_AN = 0.03 for the secondary HMKO2 relative to alpha_AN for 6C RO2 (0.16)
    ELSE IF (bcarb .EQ. 0) THEN
      bcf = 1.
    ELSE
      bcf = 1.
    ENDIF
    IF (gcarb .EQ. 1) THEN
      gcf = 0.44 ! derived from Praske, ref3190: alpha_AN = 0.07 for the primary HMKO2 relative to alpha_AN for 6C RO2 (0.16)
    ELSE IF (gcarb .EQ. 0) THEN
      gcf = 1.
    ELSE
      gcf = 1.
    ENDIF
    IF (abic .EQ. 1) THEN
      abf = 0.24 ! ratio of AN-yield for toluene (Elrod et al., ref3180), 5.5% at 200 torr, and this SAR for linear alkyl RO2 with 9 heavy atoms, 23.3%
    ELSE IF (abic .EQ. 0) THEN
      abf = 1.
    ENDIF
    Y0_298K     = alpha*EXP(beta*n)
    Y0_298K_tp  = Y0_298K * cair * (temp/298)**(-m0)
    Yinf_298K_t = Yinf_298K * (temp/298)**(-minf)
    zeta        = 1/(1+LOG10(Y0_298K_tp/Yinf_298K_t)**2)
    k_ratio     = (Y0_298K_tp/(1+Y0_298K_tp/Yinf_298K_t))*F**zeta
    alpha_AN    = k_ratio/(1+k_ratio) * m * bcf * gcf * abf
  END FUNCTION alpha_AN

  ELEMENTAL REAL(dp) FUNCTION k_limited (k3rd,cHp)
    ! diffusion limitation caps 3rd order rate coefficients
    REAL(dp), INTENT(IN) :: k3rd  ! 3rd order rate coefficient
    REAL(dp), INTENT(IN) :: cHp   ! c(H+)
    REAL(dp), PARAMETER  :: DiffLimit = 1E10 ! diffusion limitation [M-1s-1]
    INTRINSIC :: EXP
    k_limited = 1._dp / ( 1._dp/k3rd + cHp/DiffLimit)
  END FUNCTION k_limited

  ELEMENTAL REAL(dp) FUNCTION k_N2_O(temp,temp_ion)
    REAL(dp), INTENT(IN) :: temp      ! temperature [K]
    REAL(dp), INTENT(IN) :: temp_ion  ! ion temperature [K]
    REAL                 :: temp_mean
    temp_mean = (temp_ion + temp)/2
    k_N2_O = 1.4E-10*(300./temp_mean)**0.44
  END FUNCTION k_N2_O

  ELEMENTAL REAL(dp) FUNCTION k_Op_O2(temp,temp_ion)
    REAL(dp), INTENT(IN) :: temp      ! temperature [K]
    REAL(dp), INTENT(IN) :: temp_ion  ! ion temperature [K]
    REAL(dp)             :: temp_mean
    temp_mean  = 0.667*temp_ion + 0.333*temp
    k_Op_O2  = 2.82E-11 - 7.74E-12*(temp_mean/300.) + &
      1.073E-12*(temp_mean/300.)**2 - 5.17E-14*(temp_mean/300.)**3 + &
      9.65E-16*(temp_mean/300.)**4
  END FUNCTION k_Op_O2

  ELEMENTAL REAL(dp) FUNCTION k_Op_N2(temp,temp_ion)
    REAL(dp), INTENT(IN) :: temp      ! temperature [K]
    REAL(dp), INTENT(IN) :: temp_ion  ! ion temperature [K]
    REAL(dp)             :: temp_mean
    temp_mean = 0.6363*temp_ion + 0.3637*temp
    k_Op_N2 = 1.533E-12 - 5.92E-13*(temp_mean/300.) + 8.6E-14*(temp_mean/300.)**2
  END FUNCTION k_Op_N2

  ELEMENTAL REAL(dp) FUNCTION k_RO2_HO2(temp,nC)
    real(dp), intent(in) :: temp      ! temperature [K]
    integer, intent(in)  :: nC        ! q-ty of C atoms
    k_RO2_HO2 = 2.91E-13*EXP(1300./temp)*(1.-EXP(-0.245*REAL(nC,dp))) ! ref1630
  END FUNCTION k_RO2_HO2

//  ! op_pj_20120803+
//  ! This function has been introduced for sensitivity studies on OClO
//  ! within the PRACE project CASiMIR (Chemistry of the Atmosphere Simulated
//  ! with an Earth System Model for the Interpretation of Satellite based
//  ! Remote sensing observations)
//  ! To activate it again:
//  !   1) uncomment it here
//  !   2) activate it in kp4.sh
//  !   3) re-create mechanism
//  ELEMENTAL REAL(dp) FUNCTION uef(temp)
//
//    ! uncertainty estimate function
//    ! (approximated by 3rd order polynomial) for G7603
//
//    REAL(dp), INTENT(IN) :: temp      ! temperature [K]
//
//    REAL(dp), PARAMETER :: a0 =  8.4096792e+000_dp
//    REAL(dp), PARAMETER :: a1 = -6.8484593e-002_dp
//    REAL(dp), PARAMETER :: a2 =  2.3044184e-004_dp
//    REAL(dp), PARAMETER :: a3 = -2.7257885e-007_dp
//
//    uef = (a0 + a1 * temp + a2 * temp**2 + a3 * temp**3)
//
//  END FUNCTION uef
//  ! op_pj_20120803-

  ELEMENTAL REAL(DP) FUNCTION K_MD (A,B,C1,C2,C3,pH,temp,SEL)
    ! SPECIFIC RATE FUNCTION FOR METHANE DIOL CHEMISTRY 
    REAL,     INTENT(IN) :: A   ! A
    REAL,     INTENT(IN) :: B   ! B
    REAL,     INTENT(IN) :: C1  ! C1
    REAL,     INTENT(IN) :: C2  ! C2
    REAL,     INTENT(IN) :: C3  ! C3
    REAL,     INTENT(IN) :: pH  ! pH
    REAL(DP), INTENT(IN) :: temp  ! temp
    INTEGER,  INTENT(IN) :: SEL
    REAL                 :: fac1,fac2,fac3,fac_back
    INTRINSIC :: REAL
    fac1 = REAL(C1,DP) * 10.**(-REAL(pH,DP))
    fac2 = EXP(REAL(C2,DP)-(REAL(C3,DP)/temp))*10**(REAL(pH,DP))
    fac3 = EXP(REAL(A,DP)-(REAL(B,DP)/temp))
    fac_back = EXP(REAL(1.449E-2,DP)+(REAL(5.609E2,DP)/temp))
    SELECT CASE (SEL)
      CASE (1)
      K_MD = (1._dp + fac1 + fac2) * fac3 
      CASE (2)
      K_MD = ((1._dp + fac1 + fac2) * fac3)/fac_back
    END SELECT
  END FUNCTION K_MD

#ENDINLINE {above lines go into MODULE messy_mecca_kpp_Rates}

// ---------------------------------------------------------------------------

#EQUATIONS

{<G1nnn> ------------------------------- O -------------------------}{@\myhline}

// O only (#G10nn)
<G1000>  O2   + O1D      = O3P + O2  {+ 189. kJmol} : {%UpStTrG} 3.3E-11{§1.1}*EXP(55./temp); {&3245}
<G1001>  O2   + O3P {+M} = O3                       : {%UpStTrG} 6.0E-34{§1.1}*((temp/300.)**(-2.4))*cair; {&3245}
<G1002a> O3   + O1D      = 2 O2                     : {%UpStG}   1.2E-10{§1.2}; {&3245} // The path leading to 2 \kpp{O3P} + \kpp{O2} results in a null cycle regarding odd oxygen and is neglected.
<G1002b> O3   + O1D      = O2 + 2 O3P               : {%UpG}     1.2E-10{§1.2}; {&3245}
<G1003>  O3   + O3P      = 2 O2      {+ 392. kJmol} : {%UpStG}   8.0E-12{§1.1}*EXP(-2060./temp); {&3245}
<G1004>  O2   + Op       = O2p + O3P {+ 469. kJmol} : {%UpG}     k_Op_O2(temp,temp_ion); {&2616}

// O + e- (#G11nn)
<G1101>  O2p  + em       = 2 O3P  {+ 480. kJmol}    : {%UpG} 2.7E-7*(300./temp_elec)**(.7); {&2616}

{<G2nnn> ------------------------------- H -------------------------}{@\myhline}

// H + O (#G21nn)
<G2100>  H    + O2 {+M}  = HO2       {+ 204. kJmol} : {%UpStTrG} k_3rd(temp,cair,4.4E-32,1.3,7.5E-11,-0.2,0.6){§1.3}; {&3245}
<G2101>  H    + O3       = OH + O2   {+ 119. kJmol} : {%UpStG}   1.4E-10{§1.1}*EXP(-470./temp); {&3245}
<G2102>  H2   + O1D      = H + OH    {+ 181. kJmol} : {%UpStG}   1.2E-10{§1.15}; {&3245}
<G2103>  OH   + O3P      = H + O2    {+ 69.5 kJmol} : {%UpStG}   1.8E-11{§1.15}*EXP(180./temp); {&3245}
<G2104>  OH   + O3       = HO2 + O2  {+ 167. kJmol} : {%UpStTrG} 1.7E-12{§1.15}*EXP(-940./temp); {&3245}
<G2105>  OH   + H2       = H2O + H   {+ 62.7 kJmol} : {%UpStTrG} 2.8E-12{§1.05}*EXP(-1800./temp); {&3245}
<G2106>  HO2  + O3P      = OH + O2   {+ 225. kJmol} : {%UpStG}   3.E-11{§1.05}*EXP(200./temp); {&3245}
<G2107>  HO2  + O3       = OH + 2 O2 {+ 119. kJmol} : {%UpStTrG} 1.E-14{§1.15}*EXP(-490./temp); {&3245}
<G2108a> HO2  + H        = 2 OH      {+ 155. kJmol} : {%UpStG}   7.2E-11{§1.2}; {&3245}
<G2108b> HO2  + H        = H2 + O2   {+ 233. kJmol} : {%UpStG}   6.9E-12{§1.4}; {&3245}
<G2108c> HO2  + H        = O3P + H2O {+ 226. kJmol} : {%UpStG}   1.6E-12{§1.5}; {&3245}
<G2109>  HO2  + OH       = H2O + O2  {+ 295. kJmol} : {%UpStTrG} 4.8E-11{§1.15}*EXP(250./temp); {&3245}
<G2110>  HO2  + HO2      = H2O2 + O2 {+ 165. kJmol} : {%UpStTrG} k_HO2_HO2; {&3245} // The rate coefficient is: \code{k_HO2_HO2} = \code{(3.0E-13*EXP(460./temp)+2.1E-33*EXP(920./temp)*cair)*(1.+1.4E-21*EXP(2200./temp)*C(ind_H2O))}.
<G2111>  H2O  + O1D      = 2 OH      {+ 119. kJmol} : {%UpStTrG} 1.63E-10{§1.08}*EXP(60./temp); {&3245}
<G2112>  H2O2 + OH       = H2O + HO2 {+ 130. kJmol} : {%UpStTrG} 1.8E-12{§1.15}; {&3245}
<G2113>  H2   + O3P      = H + OH    {+ 7.72 kJmol} : {%UpG}     1.60E-11*EXP(-4570./temp); {&2615}
<G2114a> OH   + OH       = H2O + O3P {+ 70.4 kJmol} : {%UpG}     4.20E-12*EXP(-240./temp); {&1555}
<G2114b> OH   + OH {+M}  = H2O2                     : {%UpG}     k_3rd(temp,cair,6.9E-31,1.0,2.6E-11,0.,0.6){§1.5}; {&3245}
<G2115>  H    + H {+M}   = H2        {+ 436. kJmol} : {%UpG}     5.7E-32*(300./temp)**(1.6)*cair; {&2615}
<G2116>  H2O2 + O3P      = OH + HO2  {+ 332. kJmol} : {%UpG}     1.40E-12*EXP(-2000./temp); {&1555}
<G2117>  H2O  + H2O      = H2OH2O                   : {%UpStTrG} 6.521E-26*temp*EXP(1851.09/temp)*EXP(-5.10485E-3*temp); {&3052} // Converted to Kc [molec-1 cm3]= Kp*R*T/NA, where R is 82.05736 [cm3 atm K−1 mol−1].
<G2118>  H2OH2O          = H2O  + H2O               : {%UpStTrG} 1.E0; // Assuming fast equilibrium.

{<G3nnn> ------------------------------- N -------------------------}{@\myhline}

// N + e- (#G30nn)
<G3001>  NOp + em        = .15 N + .85 N2D + O3P {+  71. kJmol} : {%UpG} 4.2E-7*(300./temp_elec)**(0.85); {&2622}
<G3002>  N2p + em        = .88 N + 1.12 N2D      {+ 301. kJmol} : {%UpG} 1.8E-7*(temp_elec/300.)**(-0.39); {&2621}
<G3003>  N2D + em        = N + em                {+ 230. kJmol} : {%UpG} 3.8E-12*(temp_elec)**(.81); {&2621}

// N + O (#G31nn)
<G3100>  N    + O2       = NO + O3P  {+ 135. kJmol}  : {%UpStG}   1.5E-11{§1.25}*EXP(-3600./temp); {&3245}
<G3101>  N2   + O1D      = O3P + N2  {+ 189. kJmol}  : {%UpStTrG} 2.15E-11{§1.10}*EXP(110./temp); {&3245}
<G3102a> N2O  + O1D      = 2 NO      {+ 197. kJmol}  : {%UpStG}   7.259E-11{§1.1}*EXP(20./temp); {&3245}
<G3102b> N2O  + O1D      = N2 + O2                   : {%StG}     4.641E-11{§1.1}*EXP(20./temp); {&3245}
<G3103>  NO   + O3       = NO2 + O2  {+ 201. kJmol}  : {%UpStTrG} 3.0E-12{§1.1}*EXP(-1500./temp); {&3245}
<G3104>  NO   + N        = O3P + N2  {+ 259. kJmol}  : {%UpStG}   2.1E-11{§1.3}*EXP(100./temp); {&3245}
<G3105>  NO2  + O3P      = NO + O2   {+ 191. kJmol}  : {%UpStG}   5.1E-12{§1.1}*EXP(210./temp); {&3245}
<G3106>  NO2  + O3       = NO3 + O2                  : {%StTrG}   1.2E-13{§1.15}*EXP(-2450./temp); {&3245}
<G3107>  NO2  + N        = N2O + O3P {+ 104. kJmol}  : {%UpStG}   5.8E-12{§1.5}*EXP(220./temp); {&3245}
<G3108>  NO3  + NO       = 2 NO2                     : {%StTrG}   1.5E-11{§1.3}*EXP(170./temp); {&3245}
<G3109>  NO3  + NO2 {+M} = N2O5                      : {%UpStTrG} k_NO3_NO2; {&3245} // The rate coefficient is: \code{k_NO3_NO2} = \code{k_3rd(temp,cair,2.4E-30,3.0,1.6E-12,-0.1,0.6)}.
<G3110>  N2O5       {+M} = NO2 + NO3                 : {%StTrG}   k_NO3_NO2/(5.8E-27{§1.2}*EXP(10840./temp)); {&3245} // The rate coefficient is defined as backward reaction divided by equilibrium constant.
<G3111>  N2D + NO        = N2 + O3P  {+ 543. kJmol}  : {%UpG}     6.70E-11; {&2616}
<G3112>  N2D + O2        = NO + O3P  {+ 178. kJmol}  : {%UpG}     6.20E-12*(temp/300.); {&2618}
<G3113>  N2D + O3P       = N + O3P   {+ 230. kJmol}  : {%UpG}     6.90E-13; {&2619}
<G3114>  N2D + O3        = NO + O2                   : {%UpG}     0.80E-16; {&1555}
<G3115>  NO  + O3P  {+M} = NO2                       : {%UpG}     k_3rd(temp,cair,9.0E-32,1.5,3.0E-11,0.0,0.6){§1.2}; {&3245}
<G3116>  NO2 + O3P  {+M} = NO3                       : {%UpG}     k_3rd(temp,cair,2.5E-31,1.8,2.2E-11,0.7,0.6){§1.3}; {&3245}
<G3117>  N2D             = N                         : {%UpG}     10.6; {&2616}
<G3118>  Np  + O2        = NO  + Op                  : {%UpG}     3.66E-11; {&2620}
<G3119>  N2p + O3P       = NOp + N2D {+ 67.5 kJmol}  : {%UpG}     k_N2_O(temp,temp_ion); {&2616}
<G3120a> Np  + O2        = NOp + O3P {+ 646. kJmol}  : {%UpG}     2.60E-10; {&2616}
<G3120b> Np  + O2        = O2p + N   {+ 239. kJmol}  : {%UpG}     3.10E-10; {&2621}
<G3121>  Np  + O3P       = Op  + N   {+ 95.  kJmol}  : {%UpG}     1.00E-12; {&2616}
<G3122>  O2p + N         = NOp + O3P {+ 406. kJmol}  : {%UpG}     1.20E-10; {&2616}
<G3123>  O2p + NO        = NOp + O2  {+ 271. kJmol}  : {%UpG}     4.40E-10; {&2616}
<G3124>  Op  + N2        = NOp + N   {+ 105. kJmol}  : {%UpG}     k_Op_N2(temp,temp_ion); {&2616}
<G3125>  N2p + O2        = N2  + O2p {+ 340. kJmol}  : {%UpG}     5.10E-11*(temp/300.)**(-0.8); {&2616}

// N + H (#G32nn)
<G3200>  NO   + OH {+M}  = HONO          : {%TrG}   k_3rd(temp,cair,7.0E-31,2.6,3.6E-11,0.1,0.6){§1.2}; {&3245}
<G3201>  NO   + HO2      = NO2   + OH {+ 33.8 kJmol} : {%UpStTrG} 3.3E-12*EXP(270./temp){§1.15}; {&3245}
<G3202a> NO2  + OH  {+M} = HNO3          : {%UpStTrG} (1.-alpha_HOONO) * k_NO2_OH; {&3491}
<G3202b> NO2  + OH  {+M} = HOONO         : {%UpStTrG} alpha_HOONO * k_NO2_OH; {&3491}
<G3203>  NO2  + HO2 {+M} = HNO4          : {%StTrG} k_NO2_HO2; {&3245} // The rate coefficient is: \code{k_NO2_HO2} = \code{k_3rd(temp,cair,1.9E-31,3.4,4.0E-12,0.3,0.6)}.
<G3204>  NO3  + HO2      = NO2 + OH + O2 : {%TrG}   3.5E-12{§1.5}; {&3245}
<G3205>  HONO + OH       = NO2 + H2O     : {%TrG}   1.8E-11{§1.5}*EXP(-390./temp); {&3245}
<G3206>  HNO3 + OH       = H2O   + NO3   : {%StTrG} k_HNO3_OH; {&3325} // The rate coefficient is: \code{k_HNO3_OH} = \code{1.32E-14 * EXP(527/temp) + 1 / ( 1 / }\\\code{(7.39E-32 * EXP(453/temp)*cair) + 1 / }\\\code{(9.73E-17 * EXP(1910/temp)) )}
<G3207>  HNO4       {+M} = NO2   + HO2   : {%StTrG} k_NO2_HO2/(2.1E-27{§1.3}*EXP(10900./temp)); {&3245} // The rate coefficient is defined as backward reaction divided by equilibrium constant.
<G3208>  HNO4 + OH       = NO2   + H2O   : {%StTrG} 1.3E-12{§1.3}*EXP(380./temp); {&3245}
<G3209>  NH3   + OH      = NH2 + H2O     : {%TrG}   1.7E-12{§}*EXP(-710./temp); {&2415}
<G3210>  NH2   + O3      = NH2O + O2     : {%TrG}   4.3E-12{§}*EXP(-930./temp); {&2415}
<G3211>  NH2   + HO2     = NH2O + OH     : {%TrG}   4.8E-07{§}*EXP(-628./temp)*(temp)**(-1.32); {&2415}
<G3212>  NH2   + HO2     = HNO + H2O     : {%TrG}   9.4E-09{§}*EXP(-356./temp)*(temp)**(-1.12); {&2415}
<G3213>  NH2   + NO      = HO2 + OH + N2 : {%TrG}   1.92E-12{§}*((temp/298.)**(-1.5)); {&2415}
<G3214>  NH2   + NO      = N2 + H2O      : {%TrG}   1.41E-11{§}*((temp/298.)**(-1.5)); {&2415}
<G3215>  NH2   + NO2     = N2O + H2O     : {%TrG}   1.2E-11{§}*((temp/298.)**(-2.0)); {&2415}
<G3216>  NH2   + NO2     = NH2O + NO     : {%TrG}   0.8E-11{§}*((temp/298.)**(-2.0)); {&2415}
<G3217>  NH2O  + O3      = NH2 + O2      : {%TrG}   1.2E-14{§}; {&2415}
<G3218>  NH2O            = NHOH          : {%TrG}   1.3E3{§}; {&2415}
<G3219>  HNO   + OH      = NO + H2O      : {%TrG}   8.0E-11{§}*EXP(-500./temp); {&2415}
<G3220>  HNO   + NHOH    = NH2OH + NO    : {%TrG}   1.66E-12{§}*EXP(-1500./temp); {&2415}
<G3221>  HNO   + NO2     = HONO + NO     : {%TrG}   1.0E-12{§}*EXP(-1000./temp); {&2415}
<G3222>  NHOH  + OH      = HNO + H2O     : {%TrG}   1.66E-12{§}; {&2415}
<G3223>  NH2OH + OH      = NHOH + H2O    : {%TrG}   4.13E-11{§}*EXP(-2138./temp); {&2415}
<G3224>  HNO   + O2      = HO2 + NO      : {%TrG}   3.65E-14{§}*EXP(-4600./temp); {&2415}
<G3225>  N     + OH      = NO + H {+ 203. kJmol} : {%UpG} 5.00E-11; {&2615}
<G3226>  NO2   + H       = NO + OH       : {%UpG}   4.00E-10*EXP(-340./temp); {&1555}
<G3227>  HOONO {+M}      = NO2 + OH      : {%UpStTrG} (alpha_HOONO*k_NO2_OH)/(3.5E-27*EXP(10135./temp)); // Backward reaction divided by equilibrium constant from \citet{3245}.
<G3228>  HOONO + OH      = H2O + NO3     : {%UpStTrG} 1.3E-12{§1.3}*EXP(380./temp); {&3245} // Same as for \chem{OH} + \chem{HNO_4}.

{<G4nnn> ------------------------------- C -------------------------}{@\myhline}

// 1C (#G41nn)
<G4100>  CH4      + O1D      = .75 CH3 + .75 OH + .25 HCHO + .4 H + .05 H2 {+ 638. kJmol} : {%UpStG} 1.75E-10{§1.15}; {&3245}
<G4101>  CH4      + OH       = CH3 + H2O          : {%StTrG} 1.85E-20{§1.2}*EXP(2.82*LOG(temp)-987./temp); {&1627}
<G4102>  CH3OH    + OH {+.85 O2} = .85 HCHO + .85 HO2 + .15 CH3O + H2O   : {%TrG} 6.38E-18{§§0.08}*((temp)**2)*EXP(144./temp); {&1759}
<G4103a> CH3O2    + HO2      = CH3OOH + O2        : {%StTrG} 3.8E-13*EXP(780./temp)/(1.+1./498.*EXP(1160./temp)); {&1759}
<G4103b> CH3O2    + HO2      = HCHO + H2O + O2    : {%StTrG} 3.8E-13*EXP(780./temp)/(1.+498.*EXP(-1160./temp)); {&1759}
<G4104a> CH3O2    + NO       = CH3O + NO2         : {%StTrG} 2.3E-12{§§0.05}*EXP(360./temp)*(1.-beta_CH3NO3); {&1759, 3177, 3164}
<G4104b> CH3O2    + NO       = CH3NO3             : {%StTrG} 2.3E-12{§§0.05}*EXP(360./temp)*beta_CH3NO3; {&1759, 3177, 3164} // Methyl nitrate yield according to \citet{2130} but reduced by a factor of 10 according to the upper limit derived from measurements by \citet{2048}.
<G4105>  CH3O2    + NO3      = CH3O + NO2 + O2    : {%TrG} 1.2E-12{§§0.3}; {&1759}
<G4106a> CH3O2               = CH3O + .5 O2                : {%StTrG} 7.4E-13{§§0.15}*EXP(-520./temp)*RO2*2.; {&1759}
<G4106b> CH3O2               = .5 HCHO + .5 CH3OH + .5 O2  : {%StTrG} (k_CH3O2-7.4E-13{§§0.15}*EXP(-520./temp))*RO2*2.; {&1759}
<G4107>  CH3OOH   + OH       = .6 CH3O2 + .4 HCHO + .4 OH + H2O : {%StTrG} k_CH3OOH_OH; {&1745}
<G4108>  HCHO     + OH       = CO + H2O + HO2     : {%StTrG} 9.52E-18{§1.05}*EXP(2.03*LOG(temp)+636./temp); {&1634}
<G4109>  HCHO     + NO3      = HNO3 + CO + HO2    : {%TrG} 3.4E-13{§1.3}*EXP(-1900./temp); {&3245} // Same temperature dependence as for \chem{CH_3CHO}+\chem{NO_3} assumed.
<G4110>  CO       + OH       = H + CO2 {+ 103. kJmol} : {%UpStTrG} (1.57E-13+cair*3.54E-33){§1.15}; {&1628}
<G4111>  HCOOH    + OH {+O2} = CO2 + HO2 + H2O    : {%TrG} 2.94E-14*exp(786./temp)+9.85E-13*EXP(-1036./temp){§}; {&3038}
<G4112>  CO       + O3P {+M} = CO2 {+ 516. kJmol} : {%UpStG} 6.60E-33*EXP(-1103./temp); {&2615}
<G4113>  CH4      + O3P {+O2}= .51 CH3 + .51 OH + .49 CH3O + .49 H {+ 638. kJmol} : {%UpStG} 6.03E-18{§}*(temp)**(2.17)*EXP(-3619./temp); {&2615, 3059, 3060}
<G4114>  CH3O2    + NO2      = CH3O2NO2           : {%StTrG} k_NO2_CH3O2; {&3245}
<G4115>  CH3O2NO2 {+ M}      = CH3O2 + NO2        : {%StTrG} k_NO2_CH3O2/(9.5E-29{§1.3}*EXP(11234./temp)); {&3245} // The rate coefficient is defined as backward reaction divided by equilibrium constant.
<G4116>  CH3O2NO2 + OH       = HCHO + NO3 + H2O   : {%StTrG} 3.00E-14{§} ; // Same value as for PAN + OH.
<G4117>  CH3NO3   + OH {+ O2}= H2O + HCHO + NO2   : {%StTrG} 4.0E-13{§}*EXP(-845./temp); {&1759}
<G4118>  CH3O     {+ O2}     = HO2 + HCHO         : {%StTrG} 1.3E-14{§}*exp(-663./temp)*c(ind_O2); {&3043}
<G4119a> CH3O     + NO2 {+ M}= CH3NO3             : {%StTrG} k_3rd_iupac(temp,cair,8.1E-29,4.5,2.1E-11,0.,0.44){§}; {&1759}
<G4119b> CH3O     + NO2      = HCHO + HONO        : {%StTrG} 9.6E-12*EXP(-1150./temp){§§0.5}; {&1759}
<G4120a> CH3O     + NO       = CH3ONO             : {%StTrG} k_3rd_iupac(temp,cair,2.6E-29,2.8,3.3E-11,0.6,REAL(EXP(-temp/900.),SP)); {&1759}
<G4120b> CH3O     + NO       = HCHO + HNO         : {%StTrG} 2.3E-12{§§0.2}*(temp/300.)**(0.7); {&1759}
<G4121>  CH3O2    + O3       = CH3O + 2 O2        : {%StTrG} 2.9E-16{§3.}*exp(-1000./temp); {&3245}
<G4122>  CH3ONO   + OH {+ O2}= H2O + HCHO + NO    : {%StTrG} 1.E-10{§}*exp(-1764./temp); {&3044}
<G4123>  HCHO     + HO2      = HOCH2O2            : {%StTrG} 9.7E-15{§§0.3}*EXP(625./temp); {&1759}
<G4124>  HOCH2O2             = HCHO + HO2         : {%StTrG} 2.4E12{§§0.3}*EXP(-7000./temp); {&1759}
<G4125>  HOCH2O2  + HO2      = .5 HOCH2OOH + .5 HCOOH + .2 OH + .2 HO2 + .3 H2O + .8 O2 : {%StTrG} 5.6E-15{§§0.3}*EXP(2300./temp); {&1759}
<G4126>  HOCH2O2  + NO {+ O2}= NO2 + HO2 + HCOOH  : {%StTrG} 0.7275*2.3E-12*EXP(360./temp); {&1759} // Same as for G4104 but scaled to match the recommeded value at 298K.
<G4127>  HOCH2O2  + NO3      = NO2 + HO2 + HCOOH  : {%StTrG} 1.2E-12{§§0.3};  // Same as for CH3O2 + NO3 in G4105.
<G4129a> HOCH2O2             = HCOOH + HO2                   : {%StTrG} (k_CH3O2*5.5E-12{§§0.3})**(0.5)*RO2*2.; {&1759}
<G4129b> HOCH2O2             = .5 HCOOH + .5 HOCH2OH + .5 O2 : {%StTrG} (k_CH3O2*5.7E-14{§§0.3}*EXP(750./temp))**(0.5)*RO2*2.; {&1759}
<G4130a> HOCH2OOH + OH       = HOCH2O2 + H2O      : {%StTrG} k_ROOHRO; {&3030} // SAR for H-abstraction by OH.
<G4130b> HOCH2OOH + OH       = HCOOH + H2O + OH   : {%StTrG} k_ROHRO + k_s*f_sOOH*f_sOH; {&3030} // SAR for H-abstraction by OH.
<G4132>  HOCH2OH  + OH {+ O2}= HO2 + HCOOH + H2O  : {%StTrG} 2.*k_ROHRO + k_s*f_sOH*f_sOH; {&3030} // SAR for H-abstraction by OH.
<G4133>  CH3O2    + OH       = CH3O + HO2         : {%StTrG} 1.4E-10{§}; {&3042} // Lower limit of the rate constant. Products uncertain but \chem{CH_3OH} can be excluded because of a likely high energy barrier (L.\ Vereecken, pers. comm.). \chem{CH_2OO} production cannot be excluded.
<G4134>  CH2OO    {+ O2}     = CO + HO2 + OH      : {%StTrG} 1.124E+14{§}*EXP(-10000./temp); // Estimate based on the decomposition lifetime of 3 s \citep{3047} and a 20 kcal/mol energy barrier \citep{3040}.
<G4135>  CH2OO    + H2O      = HOCH2OOH           : {%StTrG} k_CH2OO_NO2*3.6E-6; {&3048} // Rate constant for \chem{CH_2OO + NO_2} (G4138) multiplied by the factor from \citet{3048}.
<G4136>  CH2OO    + H2OH2O   = HOCH2OOH + H2O     : {%StTrG} 5.2E-12; {&3173, 3174} // Average of two measurements.
<G4137>  CH2OO    + NO       = HCHO + NO2         : {%StTrG} 6.E-14{§}; {&3041} // Upper limit.
<G4138>  CH2OO    + NO2      = HCHO + NO3         : {%StTrG} k_CH2OO_NO2; {&3041, 3049} // Average of 7.E-12 and 1.5E-12.
//<G4139> new reaction number G9408
<G4140>  CH2OO    + CO       = HCHO + CO2         : {%StTrG} 3.6E-14{§}; {&3039}
<G4141>  CH2OO    + HCOOH    = 2 HCOOH            : {%StTrG} 1.E-10{§}; {&3051} // \chem{HOOCH_2OCHO} forms and then decomposes to formic anhydride \citep{2071} which hydrolyses in the humid atmosphere \citep{3045}.
<G4142>  CH2OO    + HCHO     = 2 LCARBON          : {%StTrG} 1.7E-12{§}; {&3049} // High-pressure limit.
<G4143>  CH2OO    + CH3OH    = 2 LCARBON          : {%StTrG} 5.E-12{§}; {&3039} // Generic estimate for reaction with alcohols.
<G4144>  CH2OO    + CH3O2    = 2 LCARBON          : {%StTrG} 5.E-12{§}; {&3039} // Generic estimate for reaction with \chem{RO_2}.
<G4145>  CH2OO    + HO2      = LCARBON            : {%StTrG} 5.E-12{§}; {&3039}
<G4146>  CH2OO    + O3       = HCHO + 2 O2        : {%StTrG} 1.E-12{§}; {&3053}
<G4147>  CH2OO    + CH2OO    = 2 HCHO + O2        : {%StTrG} 6.E-11{§}; {&3054}
<G4148>  HOCH2O2  + NO2      = HOCH2O2NO2         : {%StTrG} k_NO2_CH3O2; // Same value as for \chem{NO_2}+\chem{CH_3O_2}.
<G4149>  HOCH2O2NO2 {+ M}    = HOCH2O2 + NO2      : {%StTrG} k_NO2_CH3O2/(9.5E-29{§1.3}*EXP(11234./temp)); {&3055} // \citet{3055} estimated a decomposition rate equal to that of \chem{CH_3O_2NO_2}.
<G4150>  HOCH2O2NO2 + OH     = HCOOH + NO3 + H2O  : {%StTrG} 9.50E-13{§}*EXP(-650./temp)*f_sOH; // Value for \chem{CH_3O_2NO_2} + OH, H-abstraction enhanced by the HO-group by f\_sOH.
<G4151>  CH3      + O2 {+ M} = CH3O2              : {%StTrG} k_3rd_iupac(temp,cair,7.0E-31,3.,1.8E-12,-1.1,0.33){§}; {&1759}
<G4152>  CH3      + O3       = .956 HCHO + .956 H + .044 CH3O + O2 : {%StTrG} 5.1E-12{§}*exp(-210./temp); {&3056, 3057}
<G4153>  CH3      + O3P      = .83 HCHO + .83 H + .17 CO + .17 H2 + .17 H : {%StTrG} 1.3E-10{§}; {&1759}
<G4154>  CH3O     + O3       = CH3O2 + O2         : {%StTrG} 2.53E-14{§}; {&3056} // Products assumed to be \chem{CH_3O_2 + O_2} (could also be \chem{HCHO + O_2 + OH}).
<G4155>  CH3O     + O3P      = .75 CH3 + .75 O2 + .25 HCHO + .25 OH  : {%StTrG} 2.5E-11{§}; {&3037}
<G4156>  CH3O2    + O3P      = CH3O + O2          : {%StTrG} 4.3E-11{§1.46}; {&3061}
<G4157>  HCHO     + O3P      = .7 OH + .7 CO + .3 H + .3 CO2 + HO2 : {%StTrG} 3.4E-11*EXP(-1600./temp){§1.25}; {&3245}
<G4158>  CH2OOA              = .37 CH2OO + .47 CO + .47 H2O + .16 HO2 + .16 CO + .16 OH : {%TrG} KDEC; {&1759}
<G4159>  HCN      + OH       = H2O + CN           : {%TrG} k_3rd(temp,cair,4.28E-33,1.0,REAL(4.25E-13*EXP(-1150./temp),SP),1.0,0.8); {&3191}
<G4160a> HCN      + O1D      = O3P + HCN          : {%TrG} 1.08E-10*EXP(105./temp)*0.15*EXP(200./temp); {&3197}
<G4160b> HCN      + O1D      = H + NCO            : {%TrG} 1.08E-10*EXP(105./temp)*0.68/2.; {&3197} // Half of the H-yield is attributed to fast secondary chemistry.
<G4160c> HCN      + O1D      = OH + CN            : {%TrG} 1.08E-10*EXP(105./temp)*(1.-(0.68/2.+0.15*EXP(200./temp))); {&3197} // The NH + CO channel is also significant but neglected here.
<G4161>  HCN      + O3P      = H + NCO            : {%TrG} 1.0E-11*EXP(-4000./temp){§10.}; {&3245} // No studies below 450 K and only the major channel is considered.
<G4162>  CN       + O2       = NCO + O3P          : {%TrG} 1.2E-11*EXP(210./temp)*0.75; {&3037}
<G4163>  CN       + O2       = CO +  NO           : {%TrG} 1.2E-11*EXP(210./temp)*0.25; {&3037}
<G4164>  NCO      + O2       = CO2 + NO           : {%TrG} 7.E-15; {&3198} // Upper limit. Dominant pathway under atmospheric conditions.

// 2C (#G42nnn)
<G42000>  C2H6    + OH      = C2H5O2 + H2O                             : {%TrG} 1.49E-17*temp*temp*EXP(-499./temp){§§0.08}; {&1759}
<G42001>  C2H4    + O3      = HCHO + CH2OOA                            : {%TrG} 9.1E-15*EXP(-2580./temp); {&1759} // The product distribution is from \citet{2419}, after substitution of the energized Criegee intermediate, \chem{CH_2OO}, by its decomposition products and reaction of the stabilized CI with the water dimer.
<G42002>  C2H4    + OH {+O2}= HOCH2CH2O2                               : {%TrG} k_3rd_iupac(temp,cair,8.6E-29,3.1,9.E-12,0.85,0.48); {&1759, 2419}
<G42003>  C2H5O2  + HO2     = C2H5OOH                                  : {%TrG} 7.5E-13*EXP(700./temp){§1.5}; {&3245}
<G42004a> C2H5O2  + NO      = CH3CHO + HO2 + NO2                       : {%TrG} 2.55E-12*EXP(380./temp)*(1.-beta_C2H5NO3); {&1759, 3170}
<G42004b> C2H5O2  + NO      = C2H5NO3                                  : {%TrG} 2.55E-12*EXP(380./temp)*beta_C2H5NO3; {&1759, 3170}
<G42005>  C2H5O2  + NO3     = CH3CHO + HO2 + NO2                       : {%TrG} 2.3E-12; {&1745}
<G42006>  C2H5O2            = .8 CH3CHO + .6 HO2 + .2 C2H5OH           : {%TrG} 2.*(7.6E-14*k_CH3O2)**(.5)*RO2; {&3264, 1759}
<G42007a> C2H5OOH + OH      = C2H5O2 + H2O                             : {%TrG} k_ROOHRO; {&3264}
<G42007b> C2H5OOH + OH      = CH3CHO + OH                              : {%TrG} k_s*f_sOOH; {&3264}
<G42008a> CH3CHO + OH       = CH3CO + H2O                              : {%TrG} 4.4E-12*EXP(365./temp)*0.95; {&1759}
<G42008b> CH3CHO + OH       = HCOCH2O2 + H2O                           : {%TrG} 4.4E-12*EXP(365./temp)*0.05; {&1759}
<G42009>  CH3CHO  + NO3     = CH3CO + HNO3                             : {%TrG} KNO3AL; {&2419}
<G42010>  CH3CO2H + OH {+O2}= CH3 + CO2 + H2O                          : {%TrG} k_CH3CO2H_OH; {&1759} // Only major channel considered as the end products are essentially the same.
<G42011a> CH3CO3 + HO2      = OH + CH3 + CO2                           : {%TrG} 5.20E-13*EXP(980./temp)*1.507*0.61; {&3156}
<G42011b> CH3CO3 + HO2      = CH3CO3H                                  : {%TrG} 5.20E-13*EXP(980./temp)*1.507*0.23; {&3156}
<G42011c> CH3CO3 + HO2      = CH3CO2H + O3                             : {%TrG} 5.20E-13*EXP(980./temp)*1.507*0.16; {&3156}
<G42012>  CH3CO3  + NO {+O2}= CH3 + CO2 + NO2                          : {%TrG} 8.1E-12*EXP(270./temp); {&1613}
<G42013>  CH3CO3  + NO2     = PAN                                      : {%TrG} k_CH3CO3_NO2; {&3245} // The rate coefficient is: \code{k_CH3CO3_NO2} = \code{k_3rd(temp,cair,9.7E-29,5.6,9.3E-12,1.5,0.6)}.
<G42014>  CH3CO3  + NO3     = CH3 + NO2 + CO2                          : {%TrG} 4.E-12; {&1617}
<G42017a> CH3CO3            = CH3 + CO2                                : {%TrG} k1_RO2RCO3*0.9; {&3264}
<G42017b> CH3CO3            = CH3CO2H                                  : {%TrG} k1_RO2RCO3*0.1; {&3264}
<G42018>  CH3CO3H + OH      = CH3CO3 + H2O                             : {%TrG} k_ROOHRO; {&2419} // The rate coefficient is the same as for the \kpp{CH3} channel in G4107 (\kpp{CH3OOH}+\kpp{OH}).
<G42020>  PAN     + OH      = HCHO + CO + NO2 + H2O                    : {%TrG} 3.00E-14{§}; {&2419}
<G42021>  PAN     {+M}      = CH3CO3 + NO2                             : {%TrG} k_PAN_M; {&3245} // The rate coefficient is \code{k_PAN_M} = \code{k_CH3CO3_NO2/9.0E-29*EXP(-14000./temp)}, i.e.\ the rate coefficient is defined as backward reaction divided by equilibrium constant.
<G42022a> C2H2       + OH   = GLYOX + OH                               : {%TrG} k_3rd(temp,cair,5.5e-30,0.0,8.3e-13,-2.,0.6)*0.71; {&3245} // Quantum yields and products are from \citet{3176}.
<G42022b> C2H2       + OH   = HCOOH + CO + HO2                         : {%TrG} k_3rd(temp,cair,5.5e-30,0.0,8.3e-13,-2.,0.6)*0.29; {&3245} // Quantum yields and products are from \citet{3176}.
<G42023a> HOCH2CHO   + OH   = HOCH2CO + H2O                            : {%TrG} 8.00E-12*0.80; {&1759}
<G42023b> HOCH2CHO   + OH   = HOCHCHO + H2O                            : {%TrG} 8.00E-12*0.20; {&1759}
<G42024a> HOCH2CO    + O2   = HOCH2CO3                                 : {%TrG} 5.1E-12*(1.-1./(1+1.85E-18*cair)); {&1759, 3163} // Rate constant is the high-pressure limit as recommended by \citet{1759}.
<G42024b> HOCH2CO    + O2   = OH + HCHO + CO2                          : {%TrG} 5.1E-12*1./(1+1.85E-18*cair); {&1759, 3163} // Rate constant is the high-pressure limit as recommended by \citet{1759}.
<G42025>  HOCHCHO {+ O2}    = GLYOX + HO2                              : {%TrG} KDEC; {&3264}
<G42026>  HOCH2CHO   + NO3  = HOCH2CO + HNO3                           : {%TrG} KNO3AL; {&2419}
<G42027a> HOCH2CO3          = HCHO + CO2 + HO2                         : {%TrG} k1_RO2RCO3*0.9; {&3264}
<G42027b> HOCH2CO3          = HOCH2CO2H                                : {%TrG} k1_RO2RCO3*0.1; {&3264}
<G42028a> HOCH2CO3  + HO2   = HCHO + HO2 + OH + CO2                    : {%TrG} KAPHO2*r_CO3_OH; {&3264, 3156}
<G42028b> HOCH2CO3  + HO2   = HOCH2CO3H                                : {%TrG} KAPHO2*r_CO3_OOH; {&3264, 3156}
<G42028c> HOCH2CO3  + HO2   = HOCH2CO2H + O3                           : {%TrG} KAPHO2*r_CO3_O3; {&3264, 3156}
<G42029>  HOCH2CO3  + NO    = NO2 + HO2 + HCHO  + CO2                  : {%TrG} KAPNO; {&2419}
<G42030>  HOCH2CO3  + NO2   = PHAN                                     : {%TrG} k_CH3CO3_NO2; {&2419}
<G42031>  HOCH2CO3  + NO3   = NO2 + HO2 + HCHO  + CO2                  : {%TrG} KRO2NO3*1.74; {&2419}
<G42032>  HOCH2CO2H + OH    = .09 HCHO + .09 CO2 + .91 HCOCO2H + HO2 + H2O : {%TrG} k_CO2H+k_s*f_sOH*f_CO2H; {&3264}
<G42033a> HOCH2CO3H + OH    = HOCH2CO3 + H2O                           : {%TrG} k_ROOHRO; {&3264}
<G42033b> HOCH2CO3H + OH    = HCOCO3H + HO2                            : {%TrG} k_s*f_sOH*f_CO2H; {&3264}
<G42034>  PHAN              = HOCH2CO3 + NO2                           : {%TrG} k_PAN_M; {&2419}
<G42035>  PHAN       + OH   = HCHO + CO + NO2 + H2O                    : {%TrG} k_s*f_sOH*f_cpan+k_ROHRO; {&3264}
<G42036>  GLYOX      + OH   = HCOCO + H2O                              : {%TrG} 3.1E-12*EXP(340./temp); {&1759, 3150, 3169}
<G42037>  GLYOX      + NO3  = HCOCO + HNO3                             : {%TrG} KNO3AL; {&2419}
<G42038a> HCOCO             = CO + CO + HO2                            : {%TrG} 7.E11*EXP(-3160./temp)+5.E-12*c(ind_O2); {&3150, 3169, 2419}
<G42037b> HCOCO     {+ O2}  = HCOCO3                                   : {%TrG} 5.E-12*c(ind_O2)*3.2*exp(-550./temp); {&3169, 2419}
<G42037c> HCOCO     {+ O2}  = OH + CO + CO2                            : {%TrG} 5.E-12*c(ind_O2)*(1.-3.2*exp(-550./temp)); {&3169, 2419}
<G42039a> HCOCO3            = CO + HO2 + CO2                           : {%TrG} k1_RO2RCO3*0.9; {&3264}
<G42039b> HCOCO3            = HCOCO2H                                  : {%TrG} k1_RO2RCO3*0.1; {&3264}
<G42040>  HCOCO3     + HO2  = HO2 + CO + CO2 + OH                      : {%TrG} KAPHO2; {&3157, 3264}
<G42041>  HCOCO3     + NO   = HO2 + CO + NO2 + CO2                     : {%TrG} KAPNO; {&2419}
<G42042>  HCOCO3     + NO3  = HO2 + CO + NO2 + CO2                     : {%TrG} KRO2NO3*1.74; {&2419}
<G42043>  HCOCO3     + NO2  = HO2 + CO + NO3 + CO2                     : {%TrG} k_CH3CO3_NO2; {&3150, 3264}
<G42044>  HCOCO2H    + OH   = CO + HO2 + CO2 + H2O                     : {%TrG} k_CO2H+k_t*f_O*f_CO2H; {&3264}
<G42045a> HCOCO3H    + OH   = HCOCO3 + H2O                             : {%TrG} k_ROOHRO; {&3264}
<G42045b> HCOCO3H    + OH   = CO + CO2 + H2O + OH                      : {%TrG} k_t*f_O*f_CO2H; {&3264}
<G42046>  HOCH2CH2O2        = .6 HOCH2CH2O + .2 HOCH2CHO + .2 ETHGLY   : {%TrG} 2.*(7.8E-14*EXP(1000./temp)*k_CH3O2)**(.5)*RO2; {&1759, 2419}
<G42047>  HOCH2CH2O2 + NO   = .25 HO2 + .5 HCHO + .75 HOCH2CH2O + NO2  : {%TrG} KRO2NO*(1.-alpha_AN(3,1,0,0,0,temp,cair)); {&2419} // \citet{2425} estimated that about 25\% of the \kpp{HOCH2CH2O} in this reaction is produced with sufficient excess energy that it decomposes promptly. The decomposition products are 2 \kpp{HCHO} + \kpp{HO2}.
<G42048>  HOCH2CH2O2 + NO   = ETHOHNO3                                 : {%TrG} KRO2NO*alpha_AN(3,1,0,0,0,temp,cair); {&3264}
<G42049a> HOCH2CH2O2 + HO2  = HYETHO2H                                 : {%TrG} 1.53E-13*EXP(1300./temp)*(1.-r_CHOHCH2O2_OH); {&2419}
<G42049b> HOCH2CH2O2 + HO2  = HOCH2CH2O + OH                           : {%TrG} 1.53E-13*EXP(1300./temp)*r_CHOHCH2O2_OH; {&2419}
<G42050>  ETHOHNO3   + OH   = .93 NO3CH2CHO + .93 HO2 + .07 HOCH2CHO + .07 NO2 + H2O : {%TrG} k_s*(f_sOH*f_CH2ONO2+f_ONO2*f_pCH2OH)+k_ROHRO; {&3264}
<G42051a> HYETHO2H   + OH   = HOCH2CH2O2 + H2O                         : {%TrG} k_ROOHRO; {&2419} // Same as for the \chem{CH_3O_2} channel in G4107: \kpp{CH3OOH}+\kpp{OH}.
<G42051b> HYETHO2H   + OH   = HOCH2CHO + OH + H2O                      : {%TrG} k_s*f_sOOH*f_pCH2OH; {&3264}
<G42051c> HYETHO2H   + OH   = HOOCH2CHO + HO2 + H2O                    : {%TrG} k_s*f_sOH*f_pCH2OH+k_ROHRO; {&3264}
<G42052a> HOCH2CH2O {+ O2}  = HO2 + HOCH2CHO                           : {%TrG} 6.00E-14*EXP(-550./temp)*C(ind_O2); {&2419}
<G42052b> HOCH2CH2O         = HO2 + HCHO + HCHO                        : {%TrG} 9.50E13*EXP(-5988./temp); {&2419}
<G42053>  ETHGLY     + OH   = HOCH2CHO + HO2 + H2O                     : {%TrG} 2.*k_s*f_sOH*f_pCH2OH+2.*k_ROHRO; {&3264}
<G42054>  HCOCH2O2          = .6 HCHO + .6 CO + .6 HO2 + .2 GLYOX + .2 HOCH2CHO : {%TrG} k1_RO2pORO2; {&3264}
<G42055a> HCOCH2O2   + HO2  = HOOCH2CHO                                : {%TrG} k_RO2_HO2(temp,2)*r_COCH2O2_OOH; {&3264}
<G42055b> HCOCH2O2   + HO2  = HCHO + CO + HO2 + OH                     : {%TrG} k_RO2_HO2(temp,2)*r_COCH2O2_OH; {&3264}
<G42056a> HCOCH2O2   + NO   = NO2 + HCHO + CO + HO2                    : {%TrG} KRO2NO*(1.-alpha_AN(3,1,1,0,0,temp,cair)); {&3264}
<G42056b> HCOCH2O2   + NO   = NO3CH2CHO                                : {%TrG} KRO2NO*alpha_AN(3,1,1,0,0,temp,cair); {&3264}
<G42057>  HCOCH2O2   + NO3  = HCHO + CO + HO2 + NO2                    : {%TrG} KRO2NO3; {&3264}
<G42058a> HOOCH2CHO  + OH   = HCOCH2O2                                 : {%TrG} k_ROOHRO; {&3264}
<G42058b> HOOCH2CHO  + OH   = HCHO + CO + OH                           : {%TrG} 0.8*8.E-12; {&3264} // The aldehydic H is assumed to be like the analogous H of \kpp{HOCH2CHO}.
<G42058c> HOOCH2CHO  + OH   = GLYOX + OH                               : {%TrG} k_s*f_sOOH*f_CHO; {&3264}
<G42059>  HOOCH2CHO  + NO3  = OH + HCHO + CO + HNO3                    : {%TrG} KNO3AL; {&2419}
<G42060>  HOOCH2CO3  + NO   = NO2 + OH + HCHO + CO2                    : {%TrG} KAPNO; {&3264}
<G42061>  HOOCH2CO3  + NO3  = NO2 + OH + HCHO + CO2                    : {%TrG} KRO2NO3*1.74; {&3264}
<G42062a> HOOCH2CO3  + HO2  = 2 OH + HCHO + CO2                        : {%TrG} KAPHO2*r_CO3_OH; {&3264}
<G42062b> HOOCH2CO3  + HO2  = HOOCH2CO3H                               : {%TrG} KAPHO2*r_CO3_OOH; {&3264}
<G42062c> HOOCH2CO3  + HO2  = HOOCH2CO2H + O3                          : {%TrG} KAPHO2*r_CO3_O3; {&3264}
<G42063a> HOOCH2CO3         = OH + HCHO + CO2                          : {%TrG} k1_RO2RCO3*0.9; {&3264}
<G42063b> HOOCH2CO3         = HOOCH2CO2H                               : {%TrG} k1_RO2RCO3*0.1; {&3264}
<G42064a> HOOCH2CO3H + OH   = HOOCH2CO3 + H2O                          : {%TrG} 2.*k_ROOHRO; {&3264}
<G42064b> HOOCH2CO3H + OH   = HCOCO3H + OH + H2O                       : {%TrG} k_s*f_sOOH*f_CO2H; {&3264}
<G42065>  HOOCH2CO2H + OH   = HCOCO2H + OH + H2O                       : {%TrG} k_s*f_sOOH*f_CO2H+k_CO2H; {&3264}
<G42066>  CH2CO      + OH   = .6 HCHO + .6 HO2 + .6 CO + .4 HOOCH2CO2H : {%TrG} 2.8E-12*exp(510./temp); {&3037, 3264}
<G42067a> CH3CHOHOOH + OH   = CH3CO2H + OH                             : {%TrG} (k_t*f_tOOH*f_tOH + k_ROHRO); {&3264}
<G42067b> CH3CHOHOOH + OH   = CH3CHOHO2                                : {%TrG} k_ROOHRO; {&3264}
<G42068>  CH3CHOHO2         = CH3CHO + HO2                             : {%TrG} 3.46E12*EXP(-12500./(1.98*temp)); {&3153, 3264}
<G42069>  CH3CHO     + HO2  = CH3CHOHO2                                : {%TrG} 3.46E12*EXP(-12500./(1.98*temp))/(6.34E26*EXP(-14700./(1.98*temp))); {&3153, 3264}
<G42070>  CH3CHOHO2  + HO2  = .5 CH3CHOHOOH + .3 CH3CO2H + .2 CH3 + .2 HCOOH + .2 OH : {%TrG} 5.6E-15*EXP(2300./temp); {&3264}
<G42071>  CH3CHOHO2         = CH3 + HCOOH + OH                         : {%TrG} k1_RO2sORO2; {&3264}
<G42072>  CH3CHOHO2  + NO   = CH3 + HCOOH + OH + NO2                   : {%TrG} KRO2NO; {&3264}
<G42073>  C2H5NO3    + OH   = CH3CHO + H2O + NO2                       : {%TrG} 6.7E-13{§§0.3}*EXP(-395./temp); {&1759}
<G42074a> NO3CH2CHO  + OH   = GLYOX + NO2 + H2O                        : {%TrG} k_s*f_CH2ONO2*f_CHO; {&3159, 3264} // Factor of 3 to match the estimate of k = 1.E-11 molec/cm3/s by \citet{3159}.
<G42074b> NO3CH2CHO  + OH   = NO3CH2CO3 + H2O                          : {%TrG} k_t*f_O*f_CH2ONO2*3.; {&3159, 3264} // Factor of 3 to match the estimate of k = 1.E-11 molec/cm3/s by \citet{3159}.
<G42075>  NO3CH2CO3  + HO2  = HCHO + NO2 + CO2 + OH                    : {%TrG} KAPHO2; {&2419} // \chem{NO_3CH_2CO_2H} and \chem{NO_3CH_2CO_3H} neglected.
<G42076>  NO3CH2CO3  + NO   = HCHO + NO2 + CO2 + NO2                   : {%TrG} KAPNO; {&2419}
<G42077>  NO3CH2CO3  + NO2  = NO3CH2PAN                                : {%TrG} k_CH3CO3_NO2; {&2419}
<G42078>  NO3CH2CO3         = HCHO + NO2 + CO2                         : {%TrG} k1_RO2RCO3; {&2419} // \chem{NO_3CH_2CO_2H} neglected.
<G42079>  NO3CH2PAN {+ M}   = NO3CH2CO3 + NO2                          : {%TrG} k_PAN_M; {&2419}
<G42080>  C2H5O2 + NO2 {+ M}= C2H5O2NO2                                : {%StTrG} k_3rd_iupac(temp,cair,1.3E-29,6.2,8.8E-12,0.0,0.31){§}; {&1759}
<G42081>  C2H5O2NO2 {+ M}   = C2H5O2 + NO2                             : {%StTrG} k_3rd_iupac(temp,cair,REAL(4.8E-4*EXP(-9285./temp),SP),0.0,REAL(8.8E15*EXP(-10440./temp),SP),0.0,0.31){§}; {&1759}
<G42082>  C2H5O2NO2 + OH    = CH3CHO + NO3 + H2O                       : {%StTrG} 9.50E-13{§}*EXP(-650./temp); {&3264} // Same rate constant as for PAN + OH.
<G42083a> CH3CO     + O2    = CH3CO3                                   : {%TrG} 5.1E-12*(1. - 1./(1.+9.4E-18*cair)); {&1759, 3163} // Rate constant is the high-pressure limit as recommended by \citet{1759}.
<G42083b> CH3CO     + O2    = OH + HCHO + CO                           : {%TrG} 5.1E-12*1./(1.+9.4E-18*cair); {&1759, 3163} // Rate constant is the high-pressure limit as recommended by \citet{1759}.
<G42084>  C2H5OH + OH       = .95 C2H5O2 + .95 HO2 + .05 HOCH2CH2O2 + H2O : {%TrG} 3.0E-12{§§0.06}*EXP(20./temp); {&3264, 1759}
<G42085a> CH3CN + OH        = NCCH2O2 + H2O                            : {%TrG} 8.1E-13*EXP(-1080./temp)*0.40; {&1759, 3212} // Uncertainties on the kinetics at pressures $<$ 0.1 bar.
<G42085b> CH3CN + OH        = OH + CH3CO + NO                          : {%TrG} 8.1E-13*EXP(-1080./temp)*(1.-0.40); {&1759, 3212} // Channel proposed by Hynes and Wine 1991, OH + HCHO + HOCN, could not be confirmed by \cite{3212}. There is no alternative mechanism at the moment. Products assumed to be OH + CH3CO3 + NO
<G42086a> CH3CN + O1D       = O3P + CH3CN                              : {%TrG} 2.54E-10*EXP(-24./temp)*0.0269*EXP(137./temp); {&3197}
<G42086b> CH3CN + O1D       = 2 H + CO + HCN                           : {%TrG} 2.54E-10*EXP(-24./temp)*0.16; {&3197} // Assuming HCN is from channel 2h, HCO + H + HCN. HCO is replaced by H + CO.
<G42086c> CH3CN + O1D       = .5 CH3 + .5 NCO + .5 NCCH2O2 + .5 OH     : {%TrG} 2.54E-10*EXP(-24./temp)*(1.-(0.16+0.0269*EXP(137./temp))); {&3197} // Assuming exothermic channels 2b and 2d are equally important.
<G42087>  NCCH2O2 + NO      = HCN + CO2 + HO2 + NO2                    : {%TrG} KRO2NO; // HCOCN is produced but replaced here by its likely oxidation products (HCN + \chem{CO_2}) as studied by \cite{3212}. The rate constant for a typical \chem{RO_2} + NO reaction is used.
<G42088>  NCCH2O2 + HO2     = HCN + CO2 + HO2                          : {%TrG} k_RO2_HO2(temp,2); // \chem{NCCH_2OOH} is produced but replaced here by its likely oxidation products (HCN + \chem{CO_2}) as studied by \cite{3212}. The rate constant for a typical \chem{RO_2} + \chem{HO_2} reaction is used.
<G42089a> CH2CHOH + OH      = HCOOH + OH + HCHO                        : {%TrG} k_CH2CHOH_OH_HCOOH; {&3264, 3179} // The minor channel with k=5.2E-12 is combined with the major one producing \chem{HCOOH}.
<G42089b> CH2CHOH + OH      = HOCH2CHO + HO2                           : {%TrG} k_CH2CHOH_OH_ALD; {&3264, 3179}
<G42090>  CH2CHOH + HCOOH   = CH3CHO + HCOOH                           : {%TrG} k_CH2CHOH_HCOOH; {&3264, 3162} // Theoretical keto-enol tautomerization catalyzed by formic acid \citep{2040}.
<G42091>  CH3CHO + HCOOH    = CH2CHOH + HCOOH                          : {%TrG} k_ALD_HCOOH; {&3264, 3162} // Theoretical keto-enol tautomerization catalyzed by formic acid \citep{2040}.
<G42092>  HOOCCOOH     + OH = 2 CO2           + HO2  + H2O             : {%TrG} 2.0 *k_co2h; // approximated OH reaction for oxalic acid
<G42093a> HOCH2CHOHOH  + OH = HOCH2CO2H       + HO2  + H2O             : {%TrG} k_t*f_toh*f_toh; // SAR for H-abstraction by OH 
<G42093b> HOCH2CHOHOH  + OH = CHOCHOHOH       + HO2  + H2O             : {%TrG} k_s*f_soh*f_pch2oh; // SAR for H-abstraction by OH, assuming that -CHOHOH has an effect like -CH2OH 
<G42093c> HOCH2CHOHOH  + OH = HCOOH + HOCH2O2        + H2O             : {%TrG} 2.0 * k_rohro; // SAR for H-abstraction by OH 
<G42093d> HOCH2CHOHOH  + OH = HCHO + HCOOH    + HO2  + H2O             : {%TrG} k_rohro; // SAR for H-abstraction by OH 
<G42094a> CH3CHOHOH    + OH = CH3CO2H         + HO2  + H2O             : {%TrG} k_t*f_toh*f_toh; // SAR for H-abstraction by OH 
<G42094b> CH3CHOHOH    + OH = CH3 + HCOOH            + H2O             : {%TrG} 2.0 * k_rohro; // SAR for H-abstraction by OH 
<G42095a> CHOHOHCOOH   + OH = HOOCCOOH        + HO2  + H2O             : {%TrG} k_t*f_toh*f_toh*f_co2h; // SAR for H-abstraction by OH
<G42095b> CHOHOHCOOH   + OH = HCOOH + CO2     + HO2  + H2O             : {%TrG} 2.0 * k_rohro + k_co2h; // SAR for H-abstraction by OH
<G42096a> CHOHOHCHOHOH + OH = 2 HCOOH         + HO2  + H2O             : {%TrG} 4.0 * k_rohro; // SAR for H-abstraction by OH
<G42096b> CHOHOHCHOHOH + OH = CHOHOHCOOH      + HO2  + H2O             : {%TrG} 2.0 * k_t*f_toh*f_toh*f_pch2oh; // SAR for H-abstraction by OH
<G42097a> CHOCHOHOH    + OH = HCOOH + CO      + HO2  + H2O             : {%TrG} 2.0 * k_rohro + k_t*f_o*f_pch2oh; // SAR for H-abstraction by OH
<G42097b> CHOCHOHOH    + OH = HCOCO2H         + HO2  + H2O             : {%TrG} k_t*f_toh*f_toh*f_cho; // SAR for H-abstraction by OH
<G42098a> HOOCH2CHOHOH + OH = HOOCH2CO2H      + HO2  + H2O             : {%TrG} k_t*f_toh*f_toh*f_pch2oh; // SAR for H-abstraction by OH, assuming that -CH2OOH has the same effect as -CH2OH
<G42098b> HOOCH2CHOHOH + OH = HCOOH + HCHO    + OH   + H2O             : {%TrG} 2.0 * k_rohro; // SAR for H-abstraction by OH
<G42098c> HOOCH2CHOHOH + OH = CHOCHOHOH       + OH   + H2O             : {%TrG} k_s*f_pch2oh*f_sooh; // SAR for H-abstraction by OH

// 3C (#G43nnn)
<G43000a> C3H8        + OH  = IC3H7O2 + H2O   : {%TrG} k_s; {&3264}
<G43000b> C3H8        + OH  = NC3H7O2 + H2O   : {%TrG} 2.*k_p; {&3264}
<G43001a> C3H6        + O3  = HCHO + .16 CH3CHOHOOH + .50 OH + .50 HCOCH2O2 + .05 CH2CO + .09 CH3OH + .09 CO + .2 CH4 + .2 CO2 : {%TrG} 5.5E-15*EXP(-1880./temp)*.57; {&1759} // Branching ratios according to \citet{3200}.
<G43001b> C3H6        + O3  = CH3CHO + CH2OOA                                                                 : {%TrG} 5.5E-15*EXP(-1880./temp)*.43; {&1759} // Branching ratios according to \citet{3200}.
<G43002>  C3H6 {+M}   + OH  = HYPROPO2                                : {%TrG} k_3rd_iupac(temp,cair,8.6E-27,3.5,3.E-11,1.,0.5); {&1759, 2419}
<G43003>  C3H6        + NO3 = PRONO3BO2                               : {%TrG} 4.6E-13*EXP(-1155./temp); {&1745}
<G43004>  IC3H7O2     + HO2 = IC3H7OOH                                : {%TrG} 1.9E-13*EXP(1300./temp); {&964} // The value for the generic \chem{RO_2} + \chem{HO_2} reaction from \citet{964} is used here.
<G43005a> IC3H7O2     + NO  = CH3COCH3 + HO2 + NO2                    : {%TrG} 2.7E-12*EXP(360./temp)*(1.-alpha_AN(3,2,0,0,0,temp,cair)); {&1745}
<G43005b> IC3H7O2     + NO  = IC3H7NO3                                : {%TrG} 2.7E-12*EXP(360./temp)*alpha_AN(3,2,0,0,0,temp,cair); {&1745}
<G43006>  IC3H7O2           = .8 CH3COCH3 + .2 IPROPOL + .6 HO2       : {%TrG} 2.*(1.6E-12*EXP(-2200./temp)*k_CH3O2)**(.5)*RO2; {&2419, 1759}
<G43007a> IC3H7OOH    + OH  = IC3H7O2 + H2O                           : {%TrG} k_ROOHRO; {&3264}
<G43007b> IC3H7OOH    + OH  = CH3COCH3 + H2O + OH                     : {%TrG} k_t*f_tOOH; {&3264}
<G43008>  NC3H7O2     + HO2 = NC3H7OOH                                : {%TrG} 1.9E-13*EXP(1300./temp); {&964} // The value for the generic \chem{RO_2} + \chem{HO_2} reaction from \citet{964} is used here.
<G43009a> NC3H7O2     + NO  = C2H5CHO + HO2 + NO2                     : {%TrG} 2.7E-12*EXP(360./temp)*(1.-alpha_AN(3,1,0,0,0,temp,cair)); {&1745}
<G43009b> NC3H7O2     + NO  = NC3H7NO3                                : {%TrG} 2.7E-12*EXP(360./temp)*alpha_AN(3,1,0,0,0,temp,cair); {&1745}
<G43010>  NC3H7O2           = .8 CH3COCH3 + .2 NPROPOL + .6 HO2       : {%TrG} 2.*(k_CH3O2*3.E-13)**(.5)*RO2; {&2419, 1759}
<G43011>  CH3COCH3    + OH  = CH3COCH2O2 + H2O                        : {%TrG} (8.8E-12*EXP(-1320./temp)+1.7E-14*EXP(423./temp)){§§0.08}; {&1759} // Strong positive deviation of k below 240 K compared to the expression recommended by JPL \citep{3245}.
<G43012a> CH3COCH2O2  + HO2 = HYPERACET                               : {%TrG} 8.6E-13*EXP(700./temp)*r_COCH2O2_OOH; {&1613, 3264}
<G43012b> CH3COCH2O2  + HO2 = OH + CH3CO + HCHO                       : {%TrG} 8.6E-13*EXP(700./temp)*r_COCH2O2_OH; {&1613, 3264}
<G43013a> CH3COCH2O2  + NO  = CH3CO + HCHO + NO2                      : {%TrG} 2.9E-12*EXP(300./temp)*(1.-alpha_AN(4,1,1,0,0,temp,cair)); {&3245}
<G43013b> CH3COCH2O2  + NO  = NOA                                     : {%TrG} 2.9E-12*EXP(300./temp)*alpha_AN(4,1,1,0,0,temp,cair); {&3245}
<G43014>  CH3COCH2O2        = .3 CH3CO + .3 HCHO + .5 MGLYOX + .2 ACETOL : {%TrG} k1_RO2pORO2; {&3175}
<G43015a> HYPERACET   + OH  = CH3COCH2O2 + H2O                        : {%TrG} k_ROOHRO; // The same value as for G4107 (\kpp{CH3OOH} + \kpp{OH}) is used, multiplied by the branching ratio of the \kpp{CH3O2} channel.
<G43015b> HYPERACET   + OH  = MGLYOX + OH + H2O                       : {%TrG} k_s*f_sOOH*f_CO; {&3264}
<G43016>  ACETOL      + OH  = MGLYOX + HO2 + H2O                      : {%TrG} 1.6E-12*EXP(305./temp); {&1759}
<G43017>  MGLYOX      + OH  = .4 CH3 + .6 CH3CO + 1.4 CO + H2O        : {%TrG} 1.9E-12*EXP(575./temp); {&3149, 1759}
<G43020>  IC3H7NO3    + OH  = CH3COCH3 + NO2                          : {%TrG} 6.2E-13*EXP(-230./temp); {&1745}
<G43021>  CH3COCH2O2  + NO3 = CH3CO + HCHO + NO2                      : {%TrG} KRO2NO3; {&2419}
<G43022>  HYPROPO2          = CH3CHO + HCHO + HO2                     : {%TrG} k1_RO2sORO2; {&2419}
<G43023a> HYPROPO2    + HO2 = HYPROPO2H                               : {%TrG} k_RO2_HO2(temp,3)*(1.-r_CHOHCH2O2_OH); {&2419}
<G43023b> HYPROPO2    + HO2 = CH3CHO + HCHO + HO2 + OH                : {%TrG} k_RO2_HO2(temp,3)*r_CHOHCH2O2_OH; {&2419}
<G43024a> HYPROPO2    + NO  = CH3CHO + HCHO + HO2 + NO2               : {%TrG} KRO2NO*(1.-alpha_AN(4,1,0,0,0,temp,cair)); {&2419}
<G43024b> HYPROPO2    + NO  = PROPOLNO3                               : {%TrG} KRO2NO*alpha_AN(4,1,0,0,0,temp,cair); {&2419}
<G43025>  HYPROPO2    + NO3 = CH3CHO + HCHO + HO2 + NO2               : {%TrG} KRO2NO3; {&2419}
<G43026a> HYPROPO2H   + OH  = HYPROPO2                                : {%TrG} k_ROOHRO; {&2419}
<G43026b> HYPROPO2H   + OH  = ACETOL + OH                             : {%TrG} (k_s*f_sOH*f_pCH2OH+k_t*f_tOOH*f_pCH2OH); {&3264}
<G43027>  PRONO3BO2   + HO2 = PR2O2HNO3                               : {%TrG} k_RO2_HO2(temp,3); {&2419}
<G43028>  PRONO3BO2   + NO  = NOA + HO2 + NO2                         : {%TrG} KRO2NO; {&2419} // \alkylnitrateneglected\ (also not considered in MCM).
<G43029>  PRONO3BO2   + NO3 = NOA + HO2 + NO2                         : {%TrG} KRO2NO3; {&2419}
<G43030a> PR2O2HNO3   + OH  = PRONO3BO2                               : {%TrG} k_ROOHRO; {&2419}
<G43030b> PR2O2HNO3   + OH  = NOA + OH                                : {%TrG} k_t*f_tOOH*f_CH2ONO2; {&3264}
<G43031>  MGLYOX      + NO3 = CH3CO + CO + HNO3                       : {%TrG} KNO3AL*2.4; {&2419}
<G43032>  NOA         + OH  = MGLYOX + NO2                            : {%TrG} (k_s*f_CO*f_ONO2+k_p*f_CO); {&3264}
<G43033>  HOCH2COCHO  + OH  = .8609 HOCH2CO + .8609 CO + .1391 C33CO + .1391 HO2 : {%TrG} (1.9E-12*EXP(575./temp)+k_s*f_sOH*f_CO); {&3264}
<G43034>  HOCH2COCHO  + NO3 = HOCH2CO + CO + HNO3                     : {%TrG} KNO3AL*2.4; {&3264}
<G43035>  CH3COCO2H   + OH  = CH3CO + H2O + CO2                       : {%TrG} 4.9E-14*EXP(276./temp); {&3154, 3264}
<G43036>  CHOCOCH2O2        = .6 HCOCO + .6 HCHO + .2 C33CO + .2 HOCH2COCHO : {%TrG} k1_RO2pORO2; {&3264}
<G43037>  CHOCOCH2O2 + NO   = HCOCO + HCHO + NO2                      : {%TrG} KRO2NO; {&3264} // \alkylnitrateneglected\ (also not considered in MCM).
<G43038a> CHOCOCH2O2 + HO2  = ALCOCH2OOH                              : {%TrG} k_RO2_HO2(temp,3)*r_COCH2O2_OOH; {&3264}
<G43038b> CHOCOCH2O2 + HO2  = HCOCO + HCHO + OH                       : {%TrG} k_RO2_HO2(temp,3)*r_COCH2O2_OH; {&3264}
<G43039>  CHOCOCH2O2 + NO3  = HCOCO + HCHO + NO2                      : {%TrG} KRO2NO3; {&3264}
<G43040a> ALCOCH2OOH + OH   = HOOCH2CO3 + CO + H2O                    : {%TrG} k_t*f_CO*f_O; {&3264} // Rate coefficient estimated with SAR \citep{3030}.
<G43040b> ALCOCH2OOH + OH   = C33CO + H2O + OH                        : {%TrG} k_s*f_sOOH*f_CO; {&3264} // Rate coefficient estimated with SAR \citep{3030}.
<G43040c> ALCOCH2OOH + OH   = CHOCOCH2O2 + H2O                        : {%TrG} k_ROOHRO; {&3264}
<G43041>  ALCOCH2OOH + NO3  = HOOCH2CO3 + CO + HNO3                   : {%TrG} KNO3AL*2.4; {&3264}
<G43042>  HOCH2COCH2O2       = HCHO + HOCH2CO                         : {%TrG} k1_RO2pORO2; {&3264}
<G43043a> HOCH2COCH2O2 + HO2 = HOCH2COCH2OOH                          : {%TrG} k_RO2_HO2(temp,3)*r_COCH2O2_OOH; {&3264}
<G43043b> HOCH2COCH2O2 + HO2 = HCHO + HOCH2CO + OH                    : {%TrG} k_RO2_HO2(temp,3)*r_COCH2O2_OH; {&3264}
<G43044>  HOCH2COCH2O2 + NO  = HCHO + HOCH2CO + NO2                   : {%TrG} KRO2NO; {&3264} // \alkylnitrateneglected
<G43045a> HOCH2COCH2OOH + OH = HOCH2COCHO + OH                        : {%TrG} k_s*f_sOOH*f_CO; {&3264}
<G43045b> HOCH2COCH2OOH + OH = HOCH2COCH2O2                           : {%TrG} k_ROOHRO; {&3264}
<G43045c> HOCH2COCH2OOH + OH = HCOCOCH2OOH + HO2                      : {%TrG} 1.60E-12*EXP(305./temp); {&3264} // Rate coefficient assumed to equal to the one of hydroxyacetone (ACETOL) for this channel.
<G43046>  CH3CHCO    + OH    = .72 CO + .72 CH3CHO + .72 HO2 + .21 CH3COCO2H + .07 CH3CHO + .07 HO2 + .07 CO2 : {%TrG} 7.6E-11; {&3155, 3264}
<G43047>  PROPOLNO3 + OH     = ACETOL + NO2                           : {%TrG} k_t*f_ONO2*f_pCH2OH+k_s*f_sOH*f_CH2ONO2; {&3264}
<G43048>  CH3COCH2O2  + NO2  = CH3COCH2O2NO2                          : {%TrG} 2.3E-12*EXP(300./temp); {&1613} // Using the high-pressure limit.
<G43049>  CH3COCH2O2NO2 {+ M}= CH3COCH2O2  + NO2                      : {%TrG} 1.9E16*EXP(-10830./temp); {&3166} // The pressure fall-off between 1000 and 100 mbar is only 3\% \citep{3165}.
<G43050>  CH3COCH2O2NO2 + OH = MGLYOX + NO3 + H2O                     : {%TrG} 9.50E-13{§}*EXP(-650./temp)*f_CO; {&3264} // Value for \chem{CH_3O_2NO_2} + OH, H-abstraction enhanced by the \chem{CH_3CO}-group by f\_CO.
<G43051a> NC3H7OOH    + OH   = NC3H7O2 + H2O                          : {%TrG} k_ROOHRO; {&3264}
<G43051b> NC3H7OOH    + OH   = C2H5CHO + H2O + OH                     : {%TrG} k_s*f_sOOH; {&3264}
<G43051c> NC3H7OOH    + OH   = C2H5CHO + HO2 + H2O                    : {%TrG} k_s*f_pCH2OH; {&3264} // Products approximated with \kpp{C2H5CHO} + \kpp{HO2}.
<G43052>  C2H5CHO     + OH   = C2H5CO3 + H2O                          : {%TrG} 4.9E-12{§§0.1}*EXP(405./temp); {&1759} // Only major H-abstraction channel considered.
<G43053>  C2H5CHO     + NO3  = C2H5CO3 + HNO3                         : {%TrG} 6.3E-15{§§0.15}; {&1759}
<G43054a> C2H5CO3            = C2H5O2 + CO2                           : {%TrG} k1_RO2RCO3*0.9; {&3264}
<G43054b> C2H5CO3            = PROPACID                               : {%TrG} k1_RO2RCO3*0.1; {&3264}
<G43055a> C2H5CO3 + HO2      = C2H5O2 + CO2 + OH                      : {%TrG} KAPHO2*r_CO3_OH; {&3264, 3156}
<G43055b> C2H5CO3 + HO2      = PERPROACID                             : {%TrG} KAPHO2*r_CO3_OOH; {&3264, 3156}
<G43055c> C2H5CO3 + HO2      = PROPACID + O3                          : {%TrG} KAPHO2*r_CO3_O3; {&3264, 3156}
<G43056>  C2H5CO3   + NO     = NO2 + C2H5O2 + CO2                     : {%TrG} KAPNO; {&2419}
<G43057>  C2H5CO3   + NO2    = PPN                                    : {%TrG} k_CH3CO3_NO2; {&2419}
<G43058>  PPN                = C2H5CO3 + NO2                          : {%TrG} k_PAN_M; {&2419}
<G43059>  PROPACID   + OH    = CH3CHO + CO2 + H2O                     : {%TrG} k_CO2H+k_p+k_s*f_CO2H; {&3264} // Products approximated with the major end-product \kpp{CH3CHO}.
<G43060a> PERPROACID   + OH  = C2H5CO3 + H2O                          : {%TrG} k_ROOHRO; {&3264}
<G43060b> PERPROACID   + OH  = CH3CHO + CO2 + H2O                     : {%TrG} k_s*f_CO2H+k_p; {&3264} // Products approximated with the major end-product \kpp{CH3CHO}.
<G43061>  PPN        + OH    = CH3CHO + CO2 + NO2 + H2O               : {%TrG} k_s*f_cpan+k_p; {&3264} // Products approximated with the likely end-product \kpp{CH3CHO}.
<G43062>  CH3COCO3H + OH     = CH3COCO3 + H2O                         : {%TrG} k_ROOHRO; {&3264}
<G43063a> CH3COCO3 + HO2     = CH3CO + CO2 + OH                       : {%TrG} KAPHO2*r_CO3_OH; {&3264}
<G43063b> CH3COCO3 + HO2     = CH3COCO3H                              : {%TrG} KAPHO2*(r_CO3_OOH+r_CO3_O3); {&3264}
<G43064>  CH3COCO3 + NO      = CH3CO + CO2 + NO2                      : {%TrG} KAPNO; {&3264}
<G43065>  CH3COCO3 + NO2     = CH3CO + CO2 + NO3                      : {%TrG} k_CH3CO3_NO2; {&3264} // As for \kpp{HCOCO3}.
<G43066>  CH3COCO3 + NO3     = CH3CO3 + CO2 + NO2                     : {%TrG} KRO2NO3*1.74; {&3264}
<G43067>  CH3COCO3           = CH3CO3 + CO2                           : {%TrG} k1_RO2RCO3; {&3264}
<G43068>  C33CO  + OH        = 3 CO + HO2                             : {%TrG} 2.*k_t*f_CO*f_O; {&3264}
<G43069>  IPROPOL + OH       = CH3COCH3 + HO2 + H2O                   : {%TrG} 2.6E-12*EXP(200./temp); {&1759}
<G43070a> NPROPOL + OH       = C2H5CHO + HO2 + H2O                    : {%TrG} 4.6E-12*EXP(70./temp)*(k_s*f_sOH/(k_p+k_s*f_pCH2OH+k_s*f_sOH)); {&1759, 3264} // Branching ratios estimated with SAR for H-abstraction rate constants by OH.
<G43070b> NPROPOL + OH       = HYPROPO2 + H2O                         : {%TrG} 4.6E-12*EXP(70./temp)*((k_p+k_s*f_pCH2OH)/(k_p+k_s*f_pCH2OH+k_s*f_sOH)); {&1759, 3264} // Branching ratios estimated with SAR for H-abstraction rate constants by OH.
<G43071a> PROPENOL + OH      = HCOOH + OH + CH3CHO                    : {%TrG} k_CH2CHOH_OH_HCOOH; {&3264, 3179} // \onlythischannel
<G43072>  PROPENOL + HCOOH   = C2H5CHO + HCOOH                        : {%TrG} k_CH2CHOH_HCOOH; {&3264, 3162} // Theoretical keto-enol tautomerization catalyzed by formic acid \citep{2040}.
<G43073>  C2H5CHO  + HCOOH   = PROPENOL + HCOOH                       : {%TrG} k_ALD_HCOOH; {&3264, 3162} // Theoretical keto-enol tautomerization catalyzed by formic acid \citep{2040}.
<G43074>  HCOCOCH2OOH + OH   = HCOCO + CO + HO2 + OH                  : {%TrG} k_s*f_sOOH*f_CO+k_ROOHRO; {&3264} // HCOCOCHO would be produced but undergoes fast photolysis (faster than MGLYOX) and is substituted with its products.
<G43075a> CH3COCHOHOH + OH   = CH3CO + HCOOH + H2O                    : {%TrG} 2.0 * k_rohro; // Same value as for methanediol.
<G43075b> CH3COCHOHOH + OH   = CH3COCO2H + H2O                        : {%TrG} k_t*f_toh*f_toh*f_co; // Same value as for methanediol.
// terpene-related (G43200...G43399):
<G43202>  HCOCH2CHO + OH    = HCOCH2CO3                              : {%TrGTer} 4.29E-11{§}; {&2419}
<G43203>  HCOCH2CHO + NO3   = HCOCH2CO3 + HNO3                       : {%TrGTer} 2.*KNO3AL*2.4; {&2419}
<G43204a> HCOCH2CO3         = HCOCH2O2 + CO2                         : {%TrGTer} k1_RO2RCO3*0.9; {&3264}
<G43204b> HCOCH2CO3         = HCOCH2CO2H                             : {%TrGTer} k1_RO2RCO3*0.1; {&3264}
<G43205>  HCOCH2CO3 + NO    = HCOCH2O2 + CO2 + NO2                   : {%TrGTer} KAPNO; {&2419}
<G43206>  HCOCH2CO3 + NO2   = C3PAN2                                 : {%TrGTer} k_CH3CO3_NO2; {&2419}
<G43207a> HCOCH2CO3 + HO2   = HCOCH2CO3H                             : {%TrGTer} KAPHO2*r_CO3_OOH; {&2419}
<G43207b> HCOCH2CO3 + HO2   = HCOCH2CO2H + O3                        : {%TrGTer} KAPHO2*r_CO3_O3; {&2419}
<G43207c> HCOCH2CO3 + HO2   = HCOCH2O2 + CO2 + OH                    : {%TrGTer} KAPHO2*r_CO3_OH; {&2419}
<G43210>  C3PAN2            = HCOCH2CO3 + NO2                        : {%TrGTer} k_PAN_M; {&2419}
<G43211>  C3PAN2 + OH       = GLYOX + CO + NO2                       : {%TrGTer} 2.10E-11{§}; {&2419}
<G43212>  HCOCH2CO2H + OH   = HCOCH2O2 + CO2                         : {%TrGTer} 2.14E-11{§}; {&2419}
<G43213a> HOC2H4CO3         = HOCH2CH2O2 + CO2                       : {%TrGTer} k1_RO2RCO3*0.9; {&3264}
<G43213b> HOC2H4CO3         = HOC2H4CO2H                             : {%TrGTer} k1_RO2RCO3*0.1; {&3264}
<G43214>  HOC2H4CO3 + NO    = HOCH2CH2O2 + CO2 + NO2                 : {%TrGTer} KAPNO; {&2419}
<G43215a> HOC2H4CO3 + HO2   = HOC2H4CO3H                             : {%TrGTer} KAPHO2*r_CO3_OOH; {&2419}
<G43215b> HOC2H4CO3 + HO2   = HOCH2CH2O2 + CO2 + OH                  : {%TrGTer} KAPHO2*r_CO3_OH; {&2419}
<G43215c> HOC2H4CO3 + HO2   = HOC2H4CO2H + O3                        : {%TrGTer} KAPHO2*r_CO3_O3; {&2419}
<G43218>  HOC2H4CO3 + NO2   = C3PAN1                                 : {%TrGTer} k_CH3CO3_NO2; {&2419}
<G43219>  HOC2H4CO2H + OH   = HOCH2CH2O2 + CO2                       : {%TrGTer} 1.39E-11{§}; {&2419}
<G43220>  HOC2H4CO3H + OH   = HOC2H4CO3                              : {%TrGTer} 1.73E-11{§}; {&2419}
<G43221>  C3PAN1            = HOC2H4CO3 + NO2                        : {%TrGTer} k_PAN_M; {&2419}
<G43222>  C3PAN1 + OH       = HOCH2CHO + CO + NO2                    : {%TrGTer} 4.51E-12{§}; {&2419}
<G43223>  HCOCH2CO3H + OH   = HCOCH2O2 + CO2 + H2O                   : {%TrGTer} 2.49E-11{§}; {&2419} // Products simplified
// aromatics-related (G43400...G43599):
<G43415>  C3DIALOOH  + OH   = C33CO + OH                 : {%TrGAro} 1.44E-10; {&2419}
<G43418a> C3DIALO2   + HO2  = C3DIALOOH                  : {%TrGAro} k_RO2_HO2(temp,3)*(r_CO3_OOH+r_CO3_O3); {&2419}
<G43418b> C3DIALO2   + HO2  = GLYOX + CO + HO2 + OH      : {%TrGAro} k_RO2_HO2(temp,3)*r_CO3_OH; {&2419}
<G43419>  C3DIALO2   + NO   = GLYOX + CO + HO2 + NO2     : {%TrGAro} KRO2NO; {&2419} // KDEC C3DIALO $\rightarrow$ GLYOX + CO + HO2
<G43420>  C3DIALO2   + NO3  = GLYOX + CO + HO2 + NO2     : {%TrGAro} KRO2NO3; {&2419} // KDEC C3DIALO $\rightarrow$ GLYOX + CO + HO2
<G43421>  C3DIALO2          = GLYOX + CO + HO2           : {%TrGAro} k1_RO2sORO2; {&2419} // Permutation reaction (minor channels removed).
<G43422a> HCOCOHCO3  + HO2  = GLYOX + CO2 + HO2 + OH     : {%TrGAro} KAPHO2*r_CO3_OH; {&2419}
<G43422b> HCOCOHCO3  + HO2  = HCOCOHCO3H                 : {%TrGAro} KAPHO2*(r_CO3_OOH+r_CO3_O3); {&2419}
<G43424>  HCOCOHCO3  + NO   = GLYOX + CO2 + HO2 + NO2    : {%TrGAro} KAPNO; {&2419}
<G43425>  HCOCOHCO3  + NO2  = HCOCOHPAN                  : {%TrGAro} k_CH3CO3_NO2; {&2419}
<G43426>  HCOCOHCO3  + NO3  = GLYOX + CO2 + HO2 + NO2    : {%TrGAro} KRO2NO3*1.74; {&2419}
<G43427>  HCOCOHCO3         = GLYOX + CO2 + HO2          : {%TrGAro} k1_RO2RCO3; {&2419}
<G43428>  METACETHO  + OH   = CH3CO + CO2                : {%TrGAro} 9.82E-11; {&2419}
<G43442>  HCOCOHPAN  + OH   = GLYOX + CO + NO2           : {%TrGAro} 6.97E-11; {&2419}
<G43443>  HCOCOHPAN         = HCOCOHCO3 + NO2            : {%TrGAro} k_PAN_M; {&2419}
<G43444>  C32OH13CO  + OH   = HCOCOHCO3                  : {%TrGAro} 1.36E-10; {&2419}
<G43446>  HCOCOHCO3H + OH   = HCOCOHCO3                  : {%TrGAro} 7.33E-11; {&2419}

// 4C (#G44nnn)
<G44000>  NC4H10      + OH  = LC4H9O2 + H2O                                         : {%TrG} 2.03E-17*temp*temp*EXP(78./temp); {&1759} // The \kpp{LC4H9O2} composition (\chem{nC_4H_9O_2}:\chem{sC_4H_9O_2} ratio) is assumed to be equal to the ratio of the production rates at 298K: k\_p/(k\_p+k\_s) = 0.1273 and k\_s/(k\_p+k\_s) = 0.8727.
<G44001a> LC4H9O2           = C3H7CHO + HO2                                         : {%TrG} (k1_RO2pRO2*0.1273+k1_RO2sRO2*0.8727)*0.1273; {&2419, 3264}
<G44001b> LC4H9O2           = .636 MEK + .636 HO2 + .364 CH3CHO + .364 C2H5O2       : {%TrG} (k1_RO2pRO2*0.1273+k1_RO2sRO2*0.8727)*0.8727; {&2419, 3264} // \chem{sC_4H_9O_2} products are substituted with 0.636 \kpp{MEK} + \kpp{HO2} and 0.364 \kpp{CH3CHO} + \kpp{C2H5O2} at 1 bar and 298 K.
<G44002>  LC4H9O2     + HO2 = LC4H9OOH                                              : {%TrG} k_RO2_HO2(temp,4); {&2419}
<G44003a> LC4H9O2     + NO  = NO2 + C3H7CHO + HO2                                   : {%TrG} KRO2NO*(1.-(0.1273*alpha_AN(4,1,0,0,0,temp,cair)+0.8727*alpha_AN(4,2,0,0,0,temp,cair)))*0.1273; {&2419, 3264}
<G44003b> LC4H9O2     + NO  = NO2 + .636 MEK + .636 HO2 + .364 CH3CHO + .364 C2H5O2 : {%TrG} KRO2NO*(1.-(0.1273*alpha_AN(4,1,0,0,0,temp,cair)+0.8727*alpha_AN(4,2,0,0,0,temp,cair)))*0.8727; {&2419, 3264}
<G44003c> LC4H9O2     + NO  = LC4H9NO3                                              : {%TrG} KRO2NO*(0.1273*alpha_AN(4,1,0,0,0,temp,cair)+0.8727*alpha_AN(4,2,0,0,0,temp,cair)); {&2419} // The alkyl nitrate yield is the weighted average yield for the two isomers forming from \chem{nC_4H_9O_2} and \chem{sC_4H_9O_2}.
<G44004a> LC4H9O2     + NO3 = NO2 + C3H7CHO + HO2                                   : {%TrG} KRO2NO3*0.1273; {&2419, 3264}
<G44004b> LC4H9O2     + NO3 = NO2 + .636 MEK + .636 HO2 + .364 CH3CHO + .364 C2H5O2 : {%TrG} KRO2NO3*0.8727; {&2419, 3264}
<G44005a> LC4H9OOH    + OH  = LC4H9O2 + H2O                        : {%TrG} k_ROOHRO; {&3264}
<G44005b> LC4H9OOH    + OH  = C3H7CHO + H2O + OH                   : {%TrG} k_s*f_tOOH*f_alk*(k_p/(k_p+k_s)); {&3264}
<G44005c> LC4H9OOH    + OH  = MEK + H2O + OH                       : {%TrG} k_t*f_tOOH*f_alk*(k_s/(k_p+k_s)); {&3264}
<G44006a> IC4H10      + OH  = TC4H9O2 + H2O                        : {%TrG} 1.17E-17*temp*temp*EXP(213./temp)*k_t/(3.*k_p+k_t); {&1627}
<G44006b> IC4H10      + OH  = IC4H9O2 + H2O                        : {%TrG} 1.17E-17*temp*temp*EXP(213./temp)*3.*k_p/(3.*k_p+k_t); {&1627}
<G44007>  TC4H9O2           = CH3COCH3 + CH3                       : {%TrG} k1_RO2tRO2; {&2419, 3264}
<G44008>  TC4H9O2     + HO2 = TC4H9OOH                             : {%TrG} k_RO2_HO2(temp,4); {&2419}
<G44009a> TC4H9O2     + NO  = NO2 + CH3COCH3 + CH3                 : {%TrG} KRO2NO*(1.-alpha_AN(4,3,0,0,0,temp,cair)); {&2419, 3264}
<G44009b> TC4H9O2     + NO  = TC4H9NO3                             : {%TrG} KRO2NO*alpha_AN(4,3,0,0,0,temp,cair); {&2419}
<G44010a> TC4H9OOH    + OH  = TC4H9O2 + H2O                        : {%TrG} k_ROOHRO; {&3264}
<G44010b> TC4H9OOH    + OH  = CH3COCH3 + HCHO + OH + H2O           : {%TrG} 3.*k_p*f_tCH2OH; {&3264} // H-abstraction from primary C and substitution of the resulting peroxy radical with its products from the reaction with NO.
<G44011>  TC4H9NO3    + OH  = CH3COCH3 + HCHO + NO2 + H2O          : {%TrG} 3.*k_p*f_CH2ONO2; {&3264} // H-abstraction from primary C and substitution of the resulting peroxy radical with its products from the reaction with NO.
<G44012>  IC4H9O2           = IPRCHO                               : {%TrG} k1_RO2sRO2; {&2419, 3264}
<G44013>  IC4H9O2     + HO2 = IC4H9OOH                             : {%TrG} k_RO2_HO2(temp,4); {&2419}
<G44014a> IC4H9O2     + NO  = NO2 + IPRCHO                         : {%TrG} KRO2NO*(1.-alpha_AN(4,2,0,0,0,temp,cair)); {&2419, 3264}
<G44014b> IC4H9O2     + NO  = IC4H9NO3                             : {%TrG} KRO2NO*alpha_AN(4,2,0,0,0,temp,cair); {&2419}
<G44015a> IC4H9OOH    + OH  = IC4H9O2 + H2O                        : {%TrG} k_ROOHRO; {&3264}
<G44015b> IC4H9OOH    + OH  = IPRCHO + OH + H2O                    : {%TrG} k_s*f_sOOH+2.*k_s+k_t*f_pCH2OH; {&3264} // Products assumed to be only from H-abstraction from a secondary C bearing the -OOH group.
<G44016>  IC4H9NO3    + OH  = IPRCHO + NO2 + H2O                   : {%TrG} k_s*f_ONO2+2.*k_p+k_t*f_CH2ONO2; {&3264} // Products assumed to be only from H-abstraction from a secondary C bearing the -\chem{ONO_2} group.
<G44017>  MVK         + O3  = .87 MGLYOX + .5481 CO + .1392 HO2 + .1392 OH + .3219 CH2OO + .13 HCHO + .04680 OH + .04680 CO + .07280 CH3CO + .026 CH3CHO + .026 CO2 + .026 HCHO + .026 HO2 + .02402  MGLYOX + .02402 H2O2 + .00718 CH3COCO2H    : {%TrG} 8.5E-16*EXP(-1520./temp); {&3264}
<G44018>  MVK         + OH  = LHMVKABO2                            : {%TrG} 2.6E-12*EXP(610./temp); {&3264, 1759} // LHMVKABO2 is 0.12 HMVKAO2 + 0.88 HMVKBO2.
<G44019>  MEK         + OH  = LMEKO2 + H2O                         : {%TrG} 1.5E-12*EXP(-90./temp); {&1759, 3264} // \kpp{LMEKO2} represents 0.62 MEKBO2 + 0.38 MEKAO2.
<G44020>  LMEKO2      + HO2 = LMEKOOH                              : {%TrG} k_RO2_HO2(temp,4); {&3264}
<G44021a> LMEKO2 {+O2}+ NO  = .62 CH3CHO + .62 CH3CO + .38 HCHO + .38 CO2 + .38 HOCH2CH2O2 + NO2 : {%TrG} KRO2NO*(1.-(.62*alpha_AN(4,2,1,0,0,temp,cair)+.38*alpha_AN(4,1,0,1,0,temp,cair))); {&3264} // The products of MEKAO are substituted with \kpp{HCHO} + \kpp{CO2} + \kpp{HOCH2CH2O2}.
<G44021b> LMEKO2 {+O2}+ NO  = LMEKNO3                              : {%TrG} KRO2NO*(.62*alpha_AN(4,2,1,0,0,temp,cair)+.38*alpha_AN(4,1,0,1,0,temp,cair)); {&3264}
<G44022a> LMEKOOH     + OH  = LMEKO2 + H2O                         : {%TrG} k_ROOHRO; {&3264}
<G44022b> LMEKOOH     + OH  = .62 BIACET + .38 HCHO + .38 CO2 + .38 HOCH2CH2O2 + H2O + OH             : {%TrG} (.62*k_t*f_tOOH*f_CO+.38*k_s*f_sOOH); {&3264}
<G44023a> LC4H9NO3    + OH  = MEK + NO2 + H2O                      : {%TrG} (k_t*f_ONO2*f_alk+k_p*f_alk+k_s*f_CH2ONO2+k_p)*(k_s/(k_p+k_s)); {&3264} // Products from H-abstraction from the tertiary carbon bearing the \chem{ONO_2} group.
<G44023b> LC4H9NO3    + OH  = C3H7CHO + NO2 + H2O                  : {%TrG} (k_p+k_s*(1.+f_CH2ONO2+f_ONO2)*f_alk)*(k_p/(k_p+k_s)); {&3264} // Products from H-abstraction from the secondary carbon bearing the \chem{ONO_2} group.
<G44024>  MPAN        + OH  = ACETOL + CO + NO2                    : {%TrG} 3.2E-11; {&1629}
<G44025>  MPAN {+M}         = MACO3 + NO2                          : {%TrG} k_PAN_M; // Same value as for \kpp{PAN}.
<G44026>  LMEKO2            = .538 HCHO + .538 CO2 + .459 HOCH2CH2O2 + .079 C2H5O2 + .462 CH3CO + .462 CH3CHO : {%TrG} (.62*k1_RO2sORO2+.38*k1_RO2pORO2); {&2419} // Products as in G4415. Only the main channels for each isomer are considered. Weighted average for the isomers.
<G44027>  MACR        + OH  = .45 MACO3 + .55 MACRO2               : {%TrG} 8.E-12*EXP(380./temp); {&3147, 3264}
<G44028>  MACR        + O3  = .5481 CO +  .1392 HO2 + .1392 OH + .3219 CH2OO + .87 MGLYOX + .13 HCHO +  .13 OH + .065 CHOCOCH2O2 + .065 CO + .065 CH3CO    : {%TrG} 1.36E-15*EXP(-2112./temp); {&3264}
<G44029>  MACR        + NO3 = MACO3 + HNO3                         : {%TrG} KNO3AL*2.0; {&2419}
<G44030a> MACO3             = CH3CO + HCHO + CO2                   : {%TrG} k1_RO2RCO3*0.9; {&3264}
<G44030b> MACO3             = MACO2H                               : {%TrG} k1_RO2RCO3*0.1; {&3264}
<G44031a> MACO3       + HO2 = MACO2 + OH                           : {%TrG} KAPHO2*r_CO3_OH; {&3264}
<G44031b> MACO3       + HO2 = MACO3H                               : {%TrG} KAPHO2*r_CO3_OOH; {&3264}
<G44031c> MACO3       + HO2 = MACO2H + O3                          : {%TrG} KAPHO2*r_CO3_O3; {&3264}
<G44032>  MACO3       + NO  = MACO2 + NO2                          : {%TrG} 8.70E-12*EXP(290./temp); {&3264}
<G44033>  MACO3       + NO2 = MPAN                                 : {%TrG} k_CH3CO3_NO2; {&2419}
<G44034>  MACO3       + NO3 = MACO2 + NO2                          : {%TrG} KRO2NO3*1.74; {&3264}
<G44035>  MACRO2            = .7 ACETOL + .7 HCHO + .7 HO2 + .3 MACROH : {%TrG} k1_RO2tORO2; {&2419} // Rate constant replaced with the one of beta hydroxy \chem{RO_2}.
<G44036a> MACRO2      + HO2 = MACRO + OH                           : {%TrG} k_RO2_HO2(temp,4)*r_COCH2O2_OH; {&3264}
<G44036b> MACRO2      + HO2 = MACROOH                              : {%TrG} k_RO2_HO2(temp,4)*r_COCH2O2_OOH; {&3264}
<G44037a> MACRO2      + NO  = MACRO + NO2                          : {%TrG} KRO2NO*(1.-alpha_AN(6,3,1,0,0,temp,cair)); {&3264}
<G44037b> MACRO2      + NO  = MACRNO3                              : {%TrG} KRO2NO*alpha_AN(6,3,1,0,0,temp,cair); {&3264}
<G44038>  MACRO2      + NO3 = MACRO + NO2                          : {%TrG} KRO2NO3; {&3264}
<G44039a> MACROOH     + OH  = MACRO2                               : {%TrG} k_ROOHRO; {&3264}
<G44039b> MACROOH     + OH  = CO + ACETOL + OH                     : {%TrG} k_t*f_O*f_tCH2OH*f_alk; {&3264}
<G44039c> MACROOH     + OH  = CO + MGLYOX + HO2                    : {%TrG} (k_s*f_sOH*f_pCH2OH + k_ROHRO); {&3264}
<G44040>  MACROH      + OH  = ACETOL + CO + HO2                    : {%TrG} k_t*f_O*f_tCH2OH*f_alk; {&3264}
<G44041>  MACRO             = .885 ACETOL + .885 CO + .115 MGLYOX + .115 HCHO + HO2  : {%TrG} KDEC; {&3264}
<G44042>  MACO2H      + OH  = ACETOL + HO2 + CO2                   : {%TrG} ((k_adt+k_adp)*a_CO2H+k_CO2H); {&3264}
<G44043a> MACO3H      + OH  = ACETOL + CO2 + OH                    : {%TrG} (k_adt+k_adp)*a_CO2H; {&3264}
<G44043b> MACO3H      + OH  = MACO3                                : {%TrG} k_ROOHRO; {&3264}
<G44044>  LHMVKABO2         = .024 CO2H3CHO + .072 MGLYOX + .072 HO2 + .072 HCHO + .5280 CH3CO + .5280 HOCH2CHO + .176 BIACETOH + .2 HO12CO3C4 : {%TrG} (.12*k1_RO2pORO2+.88*k1_RO2sORO2); {&3264}
<G44045a> LHMVKABO2   + HO2 = OH + HOCH2CHO + CH3CO                : {%TrG} k_RO2_HO2(temp,4)*.88*r_COCH2O2_OH; {&3264}
<G44045b> LHMVKABO2   + HO2 = LHMVKABOOH                           : {%TrG} k_RO2_HO2(temp,4)*(.12+.88*r_COCH2O2_OOH); {&3264}
<G44046a> LHMVKABO2   + NO  = .12 MGLYOX + .12 HO2 + .88 HOCH2CHO + .88 CH3CO + .12 HCHO + NO2 : {%TrG} KRO2NO*(1.-(.12*alpha_AN(6,1,0,1,0,temp,cair)+.88*alpha_AN(6,2,1,0,0,temp,cair))); {&3264}
<G44046b> LHMVKABO2   + NO  = MVKNO3                               : {%TrG} KRO2NO*(.12*alpha_AN(6,1,0,1,0,temp,cair)+.88*alpha_AN(6,2,1,0,0,temp,cair)); {&3264} // Using value for secondary nitrate (88\% of total).
<G44047>  LHMVKABO2   + NO3 = .12 MGLYOX + .12 HO2 + .88 HOCH2CHO + .88 CH3CO + .12 HCHO + .12 HO2 + NO2 : {%TrG} KRO2NO3; {&3264}
<G44048a> LHMVKABOOH  + OH  = LHMVKABO2                            : {%TrG} k_ROOHRO; {&3264}
<G44048b> LHMVKABOOH  + OH  = .12 CO2H3CHO + .88 BIACETOH + OH     : {%TrG} (.12*k_s*f_sOOH*f_pCH2OH+.88*k_t*f_tOOH*f_pCH2OH*f_CO); {&3264}
<G44049a> CO2H3CHO    + OH  = CO2H3CO3                             : {%TrG} k_t*f_O*f_alk; {&3264}
<G44049b> CO2H3CHO    + OH  = CO23C3CHO + HO2 + H2O                : {%TrG} k_t*f_CO*f_tOH*f_CHO; {&3264}
<G44050>  CO2H3CHO    + NO3 = CO2H3CO3 + HNO3                      : {%TrG} KNO3AL*4.0; {&2419}
<G44051>  CO2H3CO3          = MGLYOX + HO2 + CO2                   : {%TrG} k1_RO2RCO3; {&3264}
<G44052a> CO2H3CO3    + HO2 = OH + MGLYOX + HO2 + CO2              : {%TrG} KAPHO2*r_CO3_OH; {&3264}
<G44052b> CO2H3CO3    + HO2 = CO2H3CO2H + O3                       : {%TrG} KAPHO2*r_CO3_O3; {&3264}
<G44052c> CO2H3CO3    + HO2 = CO2H3CO3H                            : {%TrG} KAPHO2*r_CO3_OOH; {&3264}
<G44053>  CO2H3CO3    + NO  = MGLYOX + HO2 + NO2  + CO2            : {%TrG} KAPNO; {&3264}
<G44054>  CO2H3CO3    + NO3 = MGLYOX + HO2 + NO2  + CO2            : {%TrG} KRO2NO3*1.74; {&3264}
<G44055a> CO2H3CO3H   + OH  = CO2H3CO3                             : {%TrG} k_ROOHRO; {&3264}
<G44055b> CO2H3CO3H   + OH  = CH3CO + CO + CO2 + OH                : {%TrG} (k_t*f_CO2H*f_CO*f_tOH); {&3264}
<G44056>  CO2H3CO2H   + OH  = CH3COCOCO2H + HO2                    : {%TrG} k_t*f_CO2H*f_CO*f_tOH+k_CO2H; {&3264}
<G44057a> HO12CO3C4   + OH  = BIACETOH + HO2                       : {%TrG} k_t*f_tOH*f_alk*f_CO; {&3264}
<G44057b> HO12CO3C4   + OH  = CO2H3CHO + HO2                       : {%TrG} k_s*f_sOH*f_alk; {&3264}
<G44058>  MACO2             = .65 CH3 + .65 CO + .65 HCHO + .35 OH + .35 CH3COCH2O2 + CO2  : {%TrG} KDEC; {&3264}
<G44059>  LHMVKABO2         = .88 MGLYOX + .88 HCHO + .12 HOOCH2CHO + .12 CH3CO + OH   : {%TrG} k_hsd; {&3264}
<G44060>  MACRO2            = MGLYOX + HCHO + OH                   : {%TrG} k_hsb; {&3264}
<G44061a> MVKNO3 + OH       = MGLYOX + CO2 + HO2 + NO2 + H2O       : {%TrG} k_s*f_sOOH*f_CH2ONO2+k_ROHRO; {&3264} // Using value for secondary nitrate (88\% of total).
<G44061b> MVKNO3 + OH       = BIACETOH + NO2 + H2O                 : {%TrG} k_t*f_ONO2*f_CO*f_pCH2OH; {&3264} // Using value for secondary nitrate (88\% of total).
<G44062a> MACRNO3 + OH      =  ACETOL + CO2 + NO2 + H2O            : {%TrG} k_t*f_O*f_CH2ONO2; {&3264} // Simplified products.
<G44062b> MACRNO3 + OH      =  MGLYOX + CO + NO2 + H2O             : {%TrG} k_ROHRO+k_s*f_sOOH*f_CH2ONO2; {&3264} // Simplified products.
<G44063>  MACRO2            = ACETOL + OH + CO                     : {%TrG} k_14hsal; {&3264}
<G44064>  EZCH3CO2CHCHO     = .9 CH3COCHCO + .1 CH3CO + .01 GLYOX + .18 CO + .09 HO2 + OH     : {%TrG} k_15hs24vynal; {&3264}
<G44065>  EZCH3CO2CHCHO + HO2=  CH3COOHCHCHO                       : {%TrG} k_RO2_HO2(temp,4); {&3264}
<G44066>  EZCH3CO2CHCHO + NO =  CH3COCHO2CHO + NO2                 : {%TrG} KRO2NO; {&3264} // \alkylnitrateneglected
<G44067>  EZCH3CO2CHCHO + NO3=  CH3COCHO2CHO + NO2                 : {%TrG} KRO2NO3; {&3264}
<G44068>  EZCH3CO2CHCHO      =  CH3COCHO2CHO                       : {%TrG} k1_RO2sORO2; {&3264}
<G44069>  EZCHOCCH3CHO2      =  HCOCCH3CO + OH                     : {%TrG} k_15hs24vynal; {&3264}
<G44070>  EZCHOCCH3CHO2 + NO =  HCOCO2CH3CHO + NO2                 : {%TrG} KRO2NO; {&3264} // \alkylnitrateneglected
<G44071>  EZCHOCCH3CHO2 + HO2=  HCOCCH3CHOOH                       : {%TrG} k_RO2_HO2(temp,4); {&3264}
<G44072>  EZCHOCCH3CHO2 + NO3=  HCOCO2CH3CHO + NO2                 : {%TrG} KRO2NO3; {&3264}
<G44073>  EZCHOCCH3CHO2      =  HCOCO2CH3CHO                       : {%TrG} k1_RO2pORO2; {&3264}
<G44074>  CH3COOHCHCHO       =  CH3COCHO2CHO + OH                  : {%TrG} k_hydec; {&3264}
<G44075>  HCOCCH3CHOOH       =  HCOCO2CH3CHO + OH                  : {%TrG} k_hydec; {&3264}
<G44076>  CH3COCHO2CHO + NO  =  CH3CO + GLYOX + NO2                : {%TrG} KRO2NO; {&3264} // \alkylnitrateneglected
<G44077>  CH3COCHO2CHO + NO3 =  CH3CO + GLYOX + NO2                : {%TrG} KRO2NO3; {&3264}
<G44078>  CH3COCHO2CHO + HO2 =  CH3CO + GLYOX + OH                 : {%TrG} k_RO2_HO2(temp,4); {&3264} // Other channel neglected.
<G44079>  CH3COCHO2CHO       =  CH3CO + GLYOX                      : {%TrG} k1_RO2sORO2; {&3264}
<G44080>  HCOCO2CH3CHO       =  MGLYOX + CO + HO2                  : {%TrG} k1_RO2tORO2; {&3264}
<G44081>  HCOCO2CH3CHO + NO  =  MGLYOX + CO + HO2 + NO2            : {%TrG} KRO2NO; {&3264} // \alkylnitrateneglected
<G44082>  HCOCO2CH3CHO + HO2 =  MGLYOX + CO + HO2 + OH             : {%TrG} k_RO2_HO2(temp,4); {&3264} // Other channel neglected.
<G44083>  HCOCO2CH3CHO + NO3 =  MGLYOX + CO + HO2 + NO2            : {%TrG} KRO2NO3; {&3264}
<G44084>  HCOCCH3CO  + OH    =  CO + MGLYOX + HO2                  : {%TrG} 1E-10*a_CHO; {&3155, 3264}
<G44085>  CH3COCHCO  + OH    = CO + MGLYOX + HO2                   : {%TrG} 7.6E-11*a_COCH3; {&3155, 3264} // k for \chem{CH_3CHCO} from \cite{3155} adjusted.
<G44086>  LMEKNO3  + OH      = .62 MGLYOX + .62 HCHO + .62 HO2 + .62 NO2 + .38 CH3CO + .38 NO3CH2CHO : {%TrG} .62*(k_p*(f_CO+f_CH2ONO2))+.38*(k_s*f_CH2ONO2*f_CO); {&3264} // Simplified product distribution.
<G44087>  MEPROPENE + OH    = IBUTOLBO2                   : {%TrG} 9.4E-12{§}*EXP(505./temp); {&1759}
<G44088a> MEPROPENE + O3    = CH3COCH3 + CH2OOA           : {%TrG} 2.7E-15{§}*EXP(-1630./temp)*0.33; {&1759, 3264}
<G44088b> MEPROPENE + O3    = CH3COCH2O2 + OH + HCHO      : {%TrG} 2.7E-15{§}*EXP(-1630./temp)*0.67; {&1759, 3264}
<G44089>  MEPROPENE + NO3   = CH3COCH3 + HCHO + NO2       : {%TrG} 3.4E-13{§}; {&1759, 3264} // The nitrated \chem{RO_2} is replaced by its products upon reaction with NO.
<G44090>  IBUTOLBO2         = CH3COCH3 + HCHO + HO2       : {%TrG} k1_RO2tORO2; {&3264}
<G44091a> IBUTOLBO2 + HO2   = IBUTOLBOOH                  : {%TrG} k_RO2_HO2(temp,4)*r_COCH2O2_OOH; {&3264}
<G44091b> IBUTOLBO2 + HO2   = CH3COCH3 + HCHO + HO2 + OH  : {%TrG} k_RO2_HO2(temp,4)*r_COCH2O2_OH; {&3264}
<G44092a> IBUTOLBO2 + NO    = CH3COCH3 + HCHO + HO2 + NO2 : {%TrG} KRO2NO*(1.-alpha_AN(5,3,0,0,0,temp,cair)); {&3264}
<G44092b> IBUTOLBO2 + NO    = IBUTOLBNO3                  : {%TrG} KRO2NO*alpha_AN(5,3,0,0,0,temp,cair); {&3264}
<G44093>  IBUTOLBO2 + NO3   = CH3COCH3 + HCHO + HO2 + NO2 : {%TrG} KRO2NO3; {&3264}
<G44094a> IBUTOLBOOH + OH   = IBUTOLBO2                   : {%TrG} k_ROOHRO; {&3264}
<G44094b> IBUTOLBOOH + OH   = CH3COCH3 + HCHO + HO2       : {%TrG} k_s*f_sOOH*f_pCH2OH; {&3264}
<G44095>  IBUTOLBNO3 + OH   = CH3COCH3 + HCHO + HO2 + NO2 : {%TrG} 3.*k_p; {&3264}
<G44096>  BUT1ENE    + OH   = LBUT1ENO2                   : {%TrG} 6.6E-12{§}*EXP(465./temp); {&1759} // Both LBUT1ENO2 isomers mostly \chem{C_2H_5CHO}.
<G44097a> BUT1ENE + O3      = HCHO + .5 C2H5CHO + .5 H2O2 + .5 CH3CHO + .5 CO + .5 HO2 : {%TrG} 3.35E-15{§}*EXP(-1745./temp)*.57; {&1759, 3264} // Branching ratios according to \citet{3200}. \chem{CH_3CHO_2CHO} is replaced with its major products \chem{CH_3CHO} + CO + \chem{HO_2}.
<G44097b> BUT1ENE + O3      = C2H5CHO + CH2OOA            : {%TrG} 3.35E-15{§}*EXP(-1745./temp)*.43; {&1759, 3264} // Branching ratios according to \citet{3200}.
<G44098>  BUT1ENE + NO3     = C2H5CHO + HCHO + NO2        : {%TrG} 3.2E-13{§}*EXP(-950./temp); {&1759, 3264} // The nitrated \chem{RO_2} is replaced by its products upon reaction with NO.
<G44099>  LBUT1ENO2         = C2H5CHO + HCHO + HO2        : {%TrG} k1_RO2sORO2; {&3264}
<G44100a> LBUT1ENO2 + HO2   = LBUT1ENOOH                  : {%TrG} k_RO2_HO2(temp,4)*r_COCH2O2_OOH; {&3264}
<G44100b> LBUT1ENO2 + HO2   = C2H5CHO + HCHO + HO2 + OH   : {%TrG} k_RO2_HO2(temp,4)*r_COCH2O2_OH; {&3264}
<G44101a> LBUT1ENO2 + NO    = C2H5CHO + HCHO + HO2 + NO2  : {%TrG} KRO2NO*(1.-alpha_AN(5,2,0,0,0,temp,cair)); {&3264}
<G44101b> LBUT1ENO2 + NO    = LBUT1ENNO3                  : {%TrG} KRO2NO*alpha_AN(5,2,0,0,0,temp,cair); {&3264}
<G44102>  LBUT1ENO2 + NO3   = C2H5CHO + HCHO + HO2 + NO2  : {%TrG} KRO2NO3; {&3264}
<G44103a> LBUT1ENOOH  + OH  = LBUT1ENO2                   : {%TrG} k_ROOHRO; {&3264}
<G44103b> LBUT1ENOOH  + OH  = C2H5CO3 + HCHO + HO2        : {%TrG} k_t*f_tOOH*f_pCH2OH; {&3264} // MEKCOH replaced by its major oxidation products.
<G44104>  LBUT1ENNO3 + OH   = C2H5CHO + CO + HO2 + NO2    : {%TrG} k_s*f_sOH*f_CH2ONO2; {&3264} // Carbonyl nitrate replaced by its major oxidation products.
<G44105>  CBUT2ENE + OH     = BUT2OLO2                    : {%TrG} 1.1E-11{§}*EXP(485./temp); {&1759}
<G44106>  CBUT2ENE + O3     = CH3CHO + .16 CH3CHOHOOH + .50 OH + .50 HCOCH2O2 + .05 CH2CO + .09 CH3OH + .09 CO + .2 CH4 + .2 CO2 : {%TrG} 3.2E-15{§}*EXP(-965./temp); {&1759, 3264} // CH3CHOOA products as from \chem{C_3H_6} + \chem{O_3} reaction.
<G44107>  CBUT2ENE + NO3    = 2 CH3CHO + NO2              : {%TrG} 3.5E-13{§}; {&1759, 3264} // The nitrated \chem{RO_2} is replaced by its products upon reaction with NO.
<G44108>  TBUT2ENE + OH     = BUT2OLO2                    : {%TrG} 1.0E-11{§}*EXP(553./temp); {&1759}
<G44109>  TBUT2ENE + O3     = CH3CHO + .16 CH3CHOHOOH + .50 OH + .50 HCOCH2O2 + .05 CH2CO + .09 CH3OH + .09 CO + .2 CH4 + .2 CO2 : {%TrG} 6.6E-15{§}*EXP(-1060./temp); {&1759, 3264}
<G44110>  TBUT2ENE + NO3    = 2 CH3CHO + NO2              : {%TrG} 1.78E-12{§}*EXP(-530./temp)+1.28E-14{§}*EXP(570./temp); {&1759, 3264} // The nitrated \chem{RO_2} is replaced by its products upon reaction with NO.
<G44111>  BUT2OLO2          = C2H5CHO + HCHO + HO2        : {%TrG} k1_RO2sORO2; {&3264}
<G44112a> BUT2OLO2 + HO2    = BUT2OLOOH                   : {%TrG} k_RO2_HO2(temp,4)*r_COCH2O2_OOH; {&3264}
<G44112b> BUT2OLO2 + HO2    = 2 CH3CHO + HO2 + OH         : {%TrG} k_RO2_HO2(temp,4)*r_COCH2O2_OH; {&3264}
<G44113a> BUT2OLO2 + NO     = 2 CH3CHO + HO2 + NO2        : {%TrG} KRO2NO*(1.-alpha_AN(5,2,0,0,0,temp,cair)); {&3264}
<G44113b> BUT2OLO2 + NO     = BUT2OLNO3                   : {%TrG} KRO2NO*alpha_AN(5,2,0,0,0,temp,cair); {&3264}
<G44114>  BUT2OLO2 + NO3    = 2 CH3CHO + HO2 + NO2        : {%TrG} KRO2NO3; {&3264}
<G44115a> BUT2OLOOH  + OH   = BUT2OLO2                    : {%TrG} k_ROOHRO; {&3264}
<G44115b> BUT2OLOOH  + OH   = LMEKOOH + HO2               : {%TrG} k_t*f_tOH*f_pCH2OH; {&3264}
<G44115c> BUT2OLOOH  + OH   = BUT2OLO + OH                : {%TrG} k_t*f_tOOH*f_pCH2OH; {&3264}
<G44116>  BUT2OLNO3  + OH   = LMEKNO3 + HO2               : {%TrG} k_t*f_tOH*f_CH2ONO2; {&3264}
<G44117>  BUT2OLO    + OH   = BIACET + HO2                : {%TrG} k_t*f_tOH*f_CO; {&3264}
<G44118>  IPRCHO + OH       = IPRCO3 + H2O                : {%TrG} 6.8E-12*EXP(410./temp){§}; {&1759}
<G44119>  IPRCHO + NO3      = IPRCO3 + HNO3               : {%TrG} 1.67E-12*EXP(-1460./temp); {&1759}
<G44120>  IPRCO3            = IC3H7O2 + CO2               : {%TrG} k1_RO2RCO3; {&2419}
<G44121a> IPRCO3 + HO2      = PERIBUACID                  : {%TrG} KAPHO2*r_CO3_OOH; {&2419, 3264}
<G44121b> IPRCO3 + HO2      = IC3H7O2 + CO2 + OH          : {%TrG} KAPHO2*(1.-r_CO3_OOH); {&2419, 3264}
<G44122>  IPRCO3 + NO2      = PIPN                        : {%TrG} k_CH3CO3_NO2; {&2419}
<G44123>  IPRCO3 + NO       = IC3H7O2 + CO2 + NO2         : {%TrG} KAPNO; {&2419}
<G44124a> PERIBUACID + OH   = IPRCO3 + H2O                : {%TrG} k_ROOHRO{§}; {&2419}
<G44124b> PERIBUACID + OH   = CH3COCH3 + H2O + CO2        : {%TrG} k_s*f_CO2H; {&3264} // Skipping intermediate steps mostly leading to acetone.
<G44125>  PIPN      {+ M}   = IPRCO3 + NO2                : {%TrG} k_PAN_M; {&2419}
<G44126>  PIPN + OH         = CH3COCH3 + CO2 + NO2        : {%TrG} k_s*f_cpan; {&3264} // Skipping intermediate steps mostly leading to acetone.
<G44127>  MPROPENOL + OH    = HCOOH + OH + CH3COCH3       : {%TrG} k_CH2CHOH_OH_HCOOH; {&3264, 3179} // \onlythischannel
<G44128>  MPROPENOL + HCOOH = IPRCHO + HCOOH              : {%TrG} k_CH2CHOH_HCOOH; {&3264, 3162} // Theoretical keto-enol tautomerization catalyzed by formic acid \citep{2040}.
<G44129>  IPRCHO    + HCOOH = MPROPENOL + HCOOH           : {%TrG} k_ALD_HCOOH; {&3264, 3162} // Theoretical keto-enol tautomerization catalyzed by formic acid \citep{2040}.
<G44130>  BUTENOL + OH      = HCOOH + OH + C2H5CHO        : {%TrG} k_CH2CHOH_OH_HCOOH; {&3264, 3179} // \onlythischannel
<G44131>  BUTENOL + HCOOH   = C3H7CHO + HCOOH             : {%TrG} k_CH2CHOH_HCOOH; {&3264, 3162} // Theoretical keto-enol tautomerization catalyzed by formic acid \citep{2040}.
<G44132>  C3H7CHO + HCOOH   = BUTENOL + HCOOH             : {%TrG} k_ALD_HCOOH; {&3264, 3162} // Theoretical keto-enol tautomerization catalyzed by formic acid \citep{2040}.
<G44133>  HVMK + OH         = HCOOH + OH + MGLYOX         : {%TrG} 8.8E-11; {&3264, 3179, 3185} // \onlythischannel
<G44134>  HVMK + HCOOH      =  CO2C3CHO + HCOOH           : {%TrG} k_CH2CHOH_HCOOH; {&3264, 3162} // Theoretical keto-enol tautomerization catalyzed by formic acid \citep{2040}.
<G44135>  CO2C3CHO + HCOOH  = HVMK + HCOOH                : {%TrG} k_ALD_HCOOH; {&3264, 3162} // Theoretical keto-enol tautomerization catalyzed by formic acid \citep{2040}.
<G44136>  HMAC + OH         = HCOOH + OH + MGLYOX         : {%TrG} 8.8E-11; {&3264, 3179, 3185} // \onlythischannel
<G44137>  HMAC + HCOOH      =  IBUTDIAL + HCOOH           : {%TrG} k_CH2CHOH_HCOOH; {&3264, 3162} // Theoretical keto-enol tautomerization catalyzed by formic acid \citep{2040}.
<G44138>  IBUTDIAL  + HCOOH = HMAC + HCOOH                : {%TrG} k_ALD_HCOOH; {&3264, 3162} // Theoretical keto-enol tautomerization catalyzed by formic acid \citep{2040}.
<G44139>  CO2C3CHO  + OH    = CH3COCH2O2 + CO2 + H2O      : {%TrG} k_t*f_O*f_alk+k_s*f_CHO*f_CO; {&3264} // Simplified oxidation.
<G44140>  CO2C3CHO  + NO3   = CH3COCH2O2 + CO2 + HNO3     : {%TrG} KNO3AL*4.0; {&3264} // Simplified oxidation.
<G44141>  IBUTDIAL  + OH    = CH3CHO + CO + HO2 + CO2 + H2O  : {%TrG} 2.*k_t*f_O*f_alk+k_t*f_CHO*f_CHO; {&3264} // Simplified oxidation.
<G44142>  IBUTDIAL  + NO3   = CH3CHO + CO + HO2 + CO2 + HNO3 : {%TrG} 2.*KNO3AL*4.0; {&3264} // Simplified oxidation.
// terpene-related (G44200...G44399):
<G44200>  BIACETO2           = CH3CO + HCHO + CO           : {%TrGTer} k1_RO2pORO2; {&2419}
<G44201>  BIACETO2  + HO2    = BIACETOOH                   : {%TrGTer} k_RO2_HO2(temp,4); {&2419}
<G44202>  BIACETO2  + NO     = CH3CO + HCHO + CO + NO2     : {%TrGTer} KRO2NO; {&2419} // \alkylnitrateneglected
<G44203a> BIACETOOH + OH     = CO23C3CHO + OH              : {%TrGTer} k_s*f_CO*f_sOOH; {&2419} // Rate coefficient estimated with SAR \citep{3030}.
<G44203b> BIACETOOH + OH     = BIACETO2                    : {%TrGTer} k_ROOHRO{§}; {&2419}
<G44204>  C44O2 + HO2        = C44OOH                      : {%TrGTer} k_RO2_HO2(temp,4); {&2419}
<G44205>  C44O2 + NO         = HCOCH2CHO + CO2 + HO2 + NO2 : {%TrGTer} KRO2NO; {&2419} // \alkylnitrateneglected
<G44206>  C44O2              = HCOCH2CHO + CO2 + HO2       : {%TrGTer} k1_RO2sORO2; {&2419}
<G44207>  C44OOH + OH        = C44O2                       : {%TrGTer} 7.46E-11{§}; {&2419}
<G44208>  CHOC3COO2          = HCOCH2CO3 + HCHO            : {%TrGTer} k1_RO2pORO2; {&2419}
<G44209>  CHOC3COO2 + HO2    = C413COOOH                   : {%TrGTer} k_RO2_HO2(temp,4); {&2419}
<G44210>  CHOC3COO2 + NO     = HCOCH2CO3 + HCHO + NO2      : {%TrGTer} KRO2NO; {&2419} // \alkylnitrateneglected
<G44211>  C413COOOH + OH     = CHOC3COO2                   : {%TrGTer} 8.33E-11{§}; {&2419}
<G44212>  C4CODIAL + OH      = C312COCO3                   : {%TrGTer} 3.39E-11{§}; {&2419}
<G44213>  C4CODIAL + NO3     = C312COCO3 + HNO3            : {%TrGTer} 2.*KNO3AL*4.0; {&2419}
<G44214>  C312COCO3          = CHOCOCH2O2 + CO2            : {%TrGTer} k1_RO2RCO3; {&2419}
<G44215a> C312COCO3 + HO2    = C312COCO3H                  : {%TrGTer} KAPHO2*r_CO3_OOH; {&2419}
<G44215b> C312COCO3 + HO2    = CHOCOCH2O2 + CO2 + OH       : {%TrGTer} KAPHO2*(1.-r_CO3_OOH); {&2419}
<G44216>  C312COCO3 + NO2    = C312COPAN                   : {%TrGTer} k_CH3CO3_NO2; {&2419}
<G44217>  C312COCO3 + NO     = CHOCOCH2O2 + CO2 + NO2      : {%TrGTer} KAPNO; {&2419}
<G44218>  C312COCO3H + OH    = C312COCO3                   : {%TrGTer} 1.63E-11{§}; {&2419}
<G44219>  C312COPAN          = C312COCO3 + NO2             : {%TrGTer} k_PAN_M; {&2419}
<G44220>  C312COPAN + OH     = C33CO + CO + NO2            : {%TrGTer} 1.27E-11{§}; {&2419}
<G44221>  CO23C3CHO + OH     = CH3CO + 2 CO                : {%TrGTer} 8.4E-13{§}*EXP(830./temp); {&3264} // Same k as for \kpp{MGLYOX} + \kpp{OH} \citep{1616}.
<G44222>  CO23C3CHO + NO3    = CH3CO + 2 CO + HNO3         : {%TrGTer} KNO3AL*4.0; {&2419}
<G44223>  IBUTALOH + OH      = IPRHOCO3                    : {%TrGTer} 1.4E-11; {&2419}
<G44224a> IPRHOCO3 + HO2     = CH3COCH3 + CO2 + HO2 + OH   : {%TrGTer} KAPHO2*r_CO3_OH; {&2419, 3264}
<G44224b> IPRHOCO3 + HO2     = IPRHOCO2H + O3              : {%TrGTer} KAPHO2*r_CO3_O3; {&2419, 3264}
<G44224c> IPRHOCO3 + HO2     = IPRHOCO3H                   : {%TrGTer} KAPHO2*r_CO3_OOH; {&2419, 3264}
<G44225>  IPRHOCO3 + NO      = CH3COCH3 + CO2 + HO2 + NO2  : {%TrGTer} KAPNO; {&2419}
<G44226>  IPRHOCO3 + NO2     = C4PAN5                      : {%TrGTer} k_CH3CO3_NO2; {&2419}
<G44227>  IPRHOCO3 + NO3     = CH3COCH3 + CO2 + HO2 + NO2  : {%TrGTer} KRO2NO3*1.74; {&2419}
<G44228a> IPRHOCO3           = CH3COCH3 + CO2 + HO2        : {%TrGTer} k1_RO2RCO3*0.7; {&2419}
<G44228b> IPRHOCO3           = IPRHOCO2H                   : {%TrGTer} k1_RO2RCO3*0.3; {&2419}
<G44229>  IPRHOCO2H + OH     = CH3COCH3 + CO2 + HO2 + H2O  : {%TrGTer} 1.72E-12; {&2419}
<G44230>  OH + IPRHOCO3H     = IPRHOCO3                    : {%TrGTer} 4.80E-12; {&2419}
<G44231>  C4PAN5 {+M}        = IPRHOCO3 + NO2              : {%TrGTer} k_PAN_M; {&2419}
<G44232>  C4PAN5 + OH        = CH3COCH3 + CO + NO2         : {%TrGTer} 4.75E-13; {&2419}
<G44233a> MBOOO              = IPRHOCO2H                   : {%TrGTer} 1.60E-17*C(ind_H2O)*(0.08+0.15); {&2419, 3264}
<G44233b> MBOOO              = IBUTALOH + H2O2             : {%TrGTer} 1.60E-17*C(ind_H2O)*0.77; {&2419, 3264}
<G44234>  MBOOO + CO         = IBUTALOH + CO2              : {%TrGTer} 1.20E-15; {&2419}
<G44235>  MBOOO + NO         = IBUTALOH + NO2              : {%TrGTer} 1.00E-14; {&2419}
<G44236>  MBOOO + NO2        = IBUTALOH + NO3              : {%TrGTer} 1.00E-15; {&2419}
// aromatics-related (G44400...G44599):
<G44400>  MALANHY    + OH  = MALANHYO2                   : {%TrGAro} 1.4E-12; {&2419}
<G44401a> MALDIALOOH + OH  = HOCOC4DIAL + OH             : {%TrGAro} 1.22E-10; {&2419}
<G44401b> MALDIALOOH + OH  = MALDIALO2                   : {%TrGAro} k_ROOHRO; {&2419}
<G44402>  NC4DCO2H   + OH  = MALANHY + NO2               : {%TrGAro} k_ROOHRO; {&2419} // KDEC NC4DCO2$\rightarrow$ MALANHY + NO2
<G44403>  CO14O3CO2H + OH  = HCOCH2O2 + 2 CO2            : {%TrGAro} 2.19E-11; {&2419}
<G44404>  BZFUOOH    + OH  = BZFUO2                      : {%TrGAro} 3.68E-11; {&2419}
<G44405>  HOCOC4DIAL + OH  = CO2C4DIAL + HO2             : {%TrGAro} 3.67E-11; {&2419}
<G44406a> MALDIALCO3 + HO2 = MALDALCO2H + O3             : {%TrGAro} KAPHO2*r_CO3_O3; {&2419}
<G44406b> MALDIALCO3 + HO2 = MALDALCO3H                  : {%TrGAro} KAPHO2*r_CO3_OOH; {&2419}
<G44406c> MALDIALCO3 + HO2 = .6 MALANHY + HO2 + .4 GLYOX + .4 CO + .4 CO2 + OH  : {%TrGAro} KAPHO2*r_CO3_OH; {&2419} // KDEC MALDIALCO2 $\rightarrow$ 0.6 MALANHY + HO2 + 0.4 GLYOX + 0.4 CO + 0.4 CO2
<G44407>  MALDIALCO3 + NO  = .6 MALANHY + HO2 + .4 GLYOX + .4 CO + .4 CO2 + NO2 : {%TrGAro} KAPNO; {&2419} // KDEC MALDIALCO2 $\rightarrow$ 0.6 MALANHY + HO2 + 0.4 GLYOX + 0.4 CO + 0.4 CO2
<G44408>  MALDIALCO3 + NO2 = MALDIALPAN                                : {%TrGAro} k_CH3CO3_NO2; {&2419}
<G44409>  MALDIALCO3 + NO3 = .6 MALANHY + HO2 + .4 GLYOX + .4 CO + .4 CO2 + NO2 : {%TrGAro} KRO2NO3*1.74; {&2419} // KDEC MALDIALCO2 $\rightarrow$ 0.6 MALANHY + HO2 + 0.4 GLYOX + 0.4 CO + 0.4 CO2
<G44410>  MALDIALCO3       = .6 MALANHY + HO2 + .4 GLYOX + .4 CO + .4 CO2       : {%TrGAro} k1_RO2RCO3; {&2419} // KDEC MALDIALCO2 $\rightarrow$ 0.6 MALANHY + HO2 + 0.4 GLYOX + 0.4 CO + 0.4 CO2
<G44411>  BZFUONE    + NO3 = NBZFUO2                     : {%TrGAro} 3.00E-13; {&2419}
<G44412>  BZFUONE    + O3  = .3125 CO14O3CO2H + .1875 CO14O3CHO + .1875 H2O2 + .5 CO + .5 CO2 + .5 HCOCH2O2 + .5 OH : {%TrGAro} 2.20E-19; // KDEC BZFUONOOA $\rightarrow$ 0.5 BZFUONOO + 0.5 CO + 0.5 CO2 + 0.5 HCOCH2O2 + 0.5 OH and BZFUONOO $\rightarrow$ 0.625 CO14O3CO2H + 0.375 CO14O3CHO + 0.375 H2O2
<G44413>  BZFUONE    + OH  = BZFUO2                      : {%TrGAro} 4.45E-11; {&2419}
<G44414>  NBZFUOOH   + OH  = NBZFUO2                     : {%TrGAro} 6.18E-12; {&2419}
<G44415>  MALDALCO3H + OH  = MALDIALCO3                  : {%TrGAro} 4.00E-11; {&2419}
<G44416>  EPXDLCO2H  + OH  = C3DIALO2 + CO2              : {%TrGAro} 2.31E-11; {&2419}
<G44417a> EPXDLCO3   + HO2 = C3DIALO2 + CO2 + OH         : {%TrGAro} KAPHO2*r_CO3_OH; {&2419}
<G44417b> EPXDLCO3   + HO2 = EPXDLCO2H + O3              : {%TrGAro} KAPHO2*r_CO3_O3; {&2419}
<G44417c> EPXDLCO3   + HO2 = EPXDLCO3H                   : {%TrGAro} KAPHO2*r_CO3_OOH; {&2419}
<G44418>  EPXDLCO3   + NO  = C3DIALO2 + CO2 + NO2        : {%TrGAro} KAPNO; {&2419}
<G44419>  EPXDLCO3   + NO2 = EPXDLPAN                    : {%TrGAro} k_CH3CO3_NO2; {&2419}
<G44420>  EPXDLCO3   + NO3 = C3DIALO2 + CO2 + NO2        : {%TrGAro} KRO2NO3*1.74; {&2419}
<G44421>  EPXDLCO3         = C3DIALO2 + CO2              : {%TrGAro} k1_RO2RCO3; {&2419} // Only major channel.
<G44422>  MALNHYOHCO + OH  = CO + CO + CO + CO2 + HO2    : {%TrGAro} 5.68E-12; {&2419}
<G44423>  MALDIAL    + NO3 = MALDIALCO3 + HNO3           : {%TrGAro} 2.*KNO3AL*2.0; {&2419}
<G44424>  MALDIAL    + O3  =  1.0675 GLYOX + .125 HCHO + .1125 HCOCO2H + .0675 H2O2  + .82 HO2 + .57 OH + 1.265 CO + .25 CO2 : {%TrGAro} 2.00E-18; {&2419} // KDEC: GLYOOA $\rightarrow$ 0.125 HCHO + 0.18 GLYOO + 0.82 HO2 + 0.57 OH + 1.265 CO + 0.25 CO2 and H2O substitution GLYOO $\rightarrow$ 0.625 HCOCO2H + 0.375 GLYOX + 0.375 H2O2
<G44425>  MALDIAL    + OH  = .83 MALDIALCO3 + .17 MALDIALO2 : {%TrGAro} 5.20E-11{§}; {&2419} // Merged equations.
<G44426>  MALANHYOOH + OH  = MALNHYOHCO + OH             : {%TrGAro} 4.66E-11{§}; {&2419}
<G44427>  MALDIALPAN + OH  = GLYOX + CO + CO + NO2       : {%TrGAro} 3.70E-11{§}; {&2419}
<G44428>  MALDIALPAN       = MALDIALCO3 + NO2            : {%TrGAro} k_PAN_M; {&2419}
<G44429a> MALANHYO2  + HO2 = MALANHYOOH                  : {%TrGAro} k_RO2_HO2(temp,4)*(1.-r_COCH2O2_OH-r_CHOHCH2O2_OH); {&2419, 3264}
<G44429b> MALANHYO2  + HO2 = HCOCOHCO3 + CO2 + OH        : {%TrGAro} k_RO2_HO2(temp,4)*(r_COCH2O2_OH+r_CHOHCH2O2_OH); {&2419, 3264}
<G44430>  MALANHYO2  + NO  = HCOCOHCO3 + CO2 + NO2       : {%TrGAro} KRO2NO; {&2419} // KDEC MALANHYO $\rightarrow$ HCOCOHCO3
<G44431>  MALANHYO2  + NO3 = HCOCOHCO3 + CO2 + NO2       : {%TrGAro} KRO2NO3; {&2419} // KDEC MALANHYO $\rightarrow$ HCOCOHCO3
<G44432>  MALANHYO2        = HCOCOHCO3 + CO2             : {%TrGAro} k1_RO2sORO2; {&2419} // Only major channel. KDEC MALANHYO $\rightarrow$ HCOCOHCO3
<G44433>  EPXDLCO3H  + OH  = EPXDLCO3                    : {%TrGAro} 2.62E-11{§}; {&2419}
<G44434>  CO2C4DIAL  + OH  = CO + CO + CO + CO + HO2     : {%TrGAro} 2.45E-11{§}; {&2419}
<G44435a> NBZFUO2    + HO2 = NBZFUOOH                    : {%TrGAro} k_RO2_HO2(temp,4)*(1.-r_COCH2O2_OH); {&2419, 3264}
<G44435b> NBZFUO2    + HO2 = .5 CO14O3CHO + .5 NO2 + .5 NBZFUONE + .5 HO2 + OH  : {%TrGAro} k_RO2_HO2(temp,4)*r_COCH2O2_OH; {&2419, 3264}
<G44436>  NBZFUO2    + NO  = .5 CO14O3CHO + .5 NO2 + .5 NBZFUONE + .5 HO2 + NO2 : {%TrGAro} KRO2NO; {&2419} // KDEC NBZFUO $\rightarrow$ 0.5 CO14O3CHO + 0.5 NO2 + 0.5 NBZFUONE + 0.5 HO2
<G44437>  NBZFUO2    + NO3 = .5 CO14O3CHO + .5 NO2 + .5 NBZFUONE + .5 HO2 + NO2 : {%TrGAro} KRO2NO3; {&2419} // KDEC NBZFUO $\rightarrow$ 0.5 CO14O3CHO + 0.5 NO2 + 0.5 NBZFUONE + 0.5 HO2
<G44438>  NBZFUO2          = .5 CO14O3CHO + .5 NO2 + .5 NBZFUONE + .5 HO2       : {%TrGAro} k1_RO2sORO2; {&2419} // KDEC NBZFUO $\rightarrow$ 0.5 CO14O3CHO + 0.5 NO2 + 0.5 NBZFUONE + 0.5 HO2 and RO2 Only major channel.
<G44439>  MALDALCO2H + OH  = .6 MALANHY + HO2 + .4 GLYOX + .4 CO + .4 CO2       : {%TrGAro} 3.70E-11{§}; {&2419} // KDEC MALDIALCO2 $\rightarrow$ 0.6 MALANHY + HO2 + 0.4 GLYOX + 0.4 CO + 0.4 CO2
<G44440>  EPXC4DIAL  + NO3 = EPXDLCO3 + HNO3             : {%TrGAro} 2.*KNO3AL*4.0; {&2419}
<G44441>  EPXC4DIAL  + OH  = EPXDLCO3                    : {%TrGAro} 4.32E-11{§}; {&2419}
<G44442a> MECOACETO2 + HO2 = MECOACEOOH                  : {%TrGAro} k_RO2_HO2(temp,4)*(1.-r_COCH2O2_OH); {&2419, 3264}
<G44442b> MECOACETO2 + HO2 = CH3CO3 + HCHO + CO2 + OH    : {%TrGAro} k_RO2_HO2(temp,4)*r_COCH2O2_OH; {&2419, 3264}
<G44443>  MECOACETO2 + NO  = CH3CO3 + HCHO + CO2 + NO2   : {%TrGAro} KRO2NO; {&2419} // KDEC MECOACETO $\rightarrow$ CH3CO3 + HCHO
<G44444>  MECOACETO2 + NO3 = CH3CO3 + HCHO + CO2 + NO2   : {%TrGAro} KRO2NO3; {&2419} // KDEC MECOACETO $\rightarrow$ CH3CO3 + HCHO
<G44445>  MECOACETO2       = CH3CO3 + HCHO + CO2         : {%TrGAro} k1_RO2pORO2; {&2419} // KDEC MECOACETO $\rightarrow$ CH3CO3 + HCHO
<G44446>  CO14O3CHO  + NO3 = CO + HCOCH2O2 + CO2 + HNO3  : {%TrGAro} KNO3AL*8.0; {&2419}
<G44447>  CO14O3CHO  + OH  = CO + HCOCH2O2 + CO2         : {%TrGAro} 3.44E-11{§}; {&2419}
<G44448>  NBZFUONE   + OH  = BZFUCO + NO2                : {%TrGAro} 1.16E-12{§}; {&2419}
<G44449a> BZFUO2     + HO2 = BZFUOOH                     : {%TrGAro} k_RO2_HO2(temp,4)*(1.-r_COCH2O2_OH-r_CHOHCH2O2_OH); {&2419, 3264}
<G44449b> BZFUO2     + HO2 = CO14O3CHO + HO2 + OH        : {%TrGAro} k_RO2_HO2(temp,4)*(r_COCH2O2_OH+r_CHOHCH2O2_OH); {&2419, 3264}
<G44450>  BZFUO2     + NO  = CO14O3CHO + HO2 + NO2       : {%TrGAro} KRO2NO; {&2419} // KDEC BZFUO $\rightarrow$ CO14O3CHO + HO2
<G44451>  BZFUO2     + NO3 = CO14O3CHO + HO2 + NO2       : {%TrGAro} KRO2NO3; {&2419} // KDEC BZFUO $\rightarrow$ CO14O3CHO + HO2
<G44452>  BZFUO2           = CO14O3CHO + HO2             : {%TrGAro} k1_RO2sORO2; {&2419} // KDEC BZFUO $\rightarrow$ CO14O3CHO + HO2. Only major channel.
<G44453>  BZFUCO     + OH  = CO14O3CHO + HO2             : {%TrGAro} 1.78E-11{§}; {&2419}
<G44456a> MALDIALO2  + HO2 = MALDIALOOH                  : {%TrGAro} k_RO2_HO2(temp,4)*(1.-r_COCH2O2_OH-r_CHOHCH2O2_OH); {&2419}
<G44456b> MALDIALO2  + HO2 = GLYOX + GLYOX + HO2 + OH    : {%TrGAro} k_RO2_HO2(temp,4)*(r_COCH2O2_OH+r_CHOHCH2O2_OH); {&2419}
<G44457>  MALDIALO2  + NO  = GLYOX + GLYOX + HO2 + NO2   : {%TrGAro} KRO2NO; {&2419} // KDEC MALDIALO $\rightarrow$ GLYOX + GLYOX + HO2
<G44458>  MALDIALO2  + NO3 = GLYOX + GLYOX + HO2 + NO2   : {%TrGAro} KRO2NO3; {&2419} // KDEC MALDIALO $\rightarrow$ GLYOX + GLYOX + HO2
<G44459>  MALDIALO2        = GLYOX + GLYOX + HO2         : {%TrGAro} k1_RO2sORO2; {&2419} // KDEC MALDIALO $\rightarrow$ GLYOX + GLYOX + HO2. Only major channel.
<G44460>  EPXDLPAN   + OH  = C33CO + CO + NO2            : {%TrGAro} 2.29E-11{§}; {&2419}
<G44461>  EPXDLPAN         = EPXDLCO3 + NO2              : {%TrGAro} k_PAN_M; {&2419} // KBPAN $\rightarrow$ k\_PAN\_M
<G44462>  MECOACEOOH + OH  = MECOACETO2                  : {%TrGAro} 3.59E-12{§}; {&2419}

// 5C (#G45nnn)
<G45000>  C5H8      + O3   = .3508 MACR + .01518 MACO2H + .2440 MVK + .7085 HCHO  + .11 CH2OO + .1275 C3H6 + .1575 CH3CO + .0510 CH3  + .2625 HO2 + .27 OH + .09482 H2O2 + .255 CO2 + .522 CO + .07182 HCHO + .03618 HCOCH2O2 + .01782 CO + 0.05408 LCARBON : {%TrG} 1.03E-14{§§0.08}*EXP(-1995./temp); {&1759, 3264}
<G45001>  C5H8      + OH   = .63 LISOPAB + .30 LISOPCD + .07 LISOPEFO2 : {%TrG} 2.7E-11*EXP(390./temp); {&1759, 3264}
<G45002>  C5H8      + NO3  = NISOPO2      : {%TrG} 3.0E-12*EXP(-450./temp); {&1759}
<G45003a> LISOPAB    + O2  = LISOPACO2    : {%TrG} 5.530E-13; {&3264}
<G45003b> LISOPAB    + O2  = ISOPBO2      : {%TrG} 3.E-12; {&3264}
<G45004a> LISOPCD    + O2  = LDISOPACO2   : {%TrG} 6.780E-13; {&3264}
<G45004b> LISOPCD    + O2  = ISOPDO2      : {%TrG} 3.E-12; {&3264}
<G45005>  LISOPACO2        = LISOPAB + O2 : {%TrG} 3.1E12*exp(-7900./temp)*.6+7.8E13*exp(-8600./temp)*.4; {&3264}
<G45006>  ISOPBO2          = LISOPAB + O2 : {%TrG} 3.7E14*exp(-9570./temp)+4.2E14*exp(-9970./temp); {&3264}
<G45007>  LDISOPACO2       = LISOPCD + O2 : {%TrG} 5.65E12*exp(-8410./temp)*.42+1.4E14*exp(-9110./temp)*.58; {&3264}
<G45008>  ISOPDO2          = LISOPCD + O2 : {%TrG} 5.0E14*exp(-10120./temp)+8.25E14*exp(-10220./temp); {&3264}
<G45009a> LISOPACO2        = C1ODC2O2C4OOH        : {%TrG} k_16hsz14 * 2./3.*(1.-f_HPAL); {&3264} {Approx. it should be C1ODC2O2C3OOHC4OOH}
<G45009b> LISOPACO2        = LZCODC23DBCOOH + HO2 : {%TrG} k_16hsz14 * (2./3.*f_HPAL + 1./3.); {&3264}
<G45010a> LDISOPACO2       = C1OOHC3O2C4OD        : {%TrG} k_16hsz41 * 2./3.*(1.-f_HPAL); {&3264} {Approx., it should be C1OOHC2OOHC3O2C4OD}
<G45010b> LDISOPACO2       = LZCODC23DBCOOH + HO2 : {%TrG} k_16hsz41 * (2./3.*f_HPAL + 1./3.); {&3264}
<G45011>  LISOPACO2        = .9 LISOPACO + .1 ISOPAOH                                : {%TrG} k1_RO2LISOPACO2; {&2419, 3264}
<G45012>  LISOPACO2  + HO2 = LISOPACOOH                                              : {%TrG} k_RO2_HO2(temp,5); {&2419}
<G45013a> LISOPACO2  + NO  = LISOPACO + NO2                                          : {%TrG} KRO2NO*(1.-alpha_AN(6,1,0,0,0,temp,cair)); {&3158, 3159, 3264}
<G45013b> LISOPACO2  + NO  = LISOPACNO3                                              : {%TrG} KRO2NO*alpha_AN(6,1,0,0,0,temp,cair); {&3158, 3159, 3264}
<G45014>  LISOPACO2  + NO3 = LISOPACO + NO2                                          : {%TrG} KRO2NO3; {&2419}
<G45015>  LDISOPACO2       = .9 LDISOPACO + .1 ISOPAOH                               : {%TrG} k1_RO2LISOPACO2; {&2419, 3264}
<G45016>  LDISOPACO2 + HO2 = LISOPACOOH                                              : {%TrG} k_RO2_HO2(temp,5); {&2419}
<G45017a> LDISOPACO2 + NO  = LDISOPACO + NO2                                         : {%TrG} KRO2NO*(1.-alpha_AN(6,1,0,0,0,temp,cair)); {&3158, 3159, 3264}
<G45017b> LDISOPACO2 + NO  = LISOPACNO3                                              : {%TrG} KRO2NO*alpha_AN(6,1,0,0,0,temp,cair); {&3158, 3159, 3264}
<G45018>  LDISOPACO2 + NO3 = LDISOPACO + NO2                                         : {%TrG} KRO2NO3; {&2419}
<G45019a> LISOPACOOH + OH  = LISOPACO2                                               : {%TrG} k_ROOHRO; {&3264}
<G45019b> LISOPACOOH + OH  = LZCODC23DBCOOH + HO2                                    : {%TrG} k_s*f_allyl*f_sOH; {&3264}
<G45019c> LISOPACOOH + OH  = LHC4ACCHO + OH                                          : {%TrG} (k_s*f_sOOH*f_allyl+ k_ROHRO); {&3264}
<G45019d> LISOPACOOH + OH  = LIEPOX + OH                                             : {%TrG} (k_adt+k_ads)*a_CH2OH*a_CH2OOH; {&3264} // Delta-1 and delta-2 LIEPOX are not considered and replaced by beta-LIEPOX formed by ISOPBOOH and ISOPDOOH.
<G45020>  ISOPAOH    + OH  = LHC4ACCHO + HO2                                         : {%TrG} (k_adt+k_ads)*a_CH2OH*a_CH2OH+k_s*f_sOH*f_allyl+k_ROHRO; {&3264}
<G45021>  LISOPACNO3 + OH  = LISOPACNO3O2                                            : {%TrG} (k_adt+k_ads)*a_CH2ONO2*a_CH2OH{§}; {&3264} // SAR estimate within uncertainty range of the experimentally determined rate constant by \citet{2093}, 1.1E-11.
<G45022>  ISOPBO2          = .8 MVK + .8 HCHO + .8 HO2 + .2 ISOPBOH                  : {%TrG} k1_RO2ISOPBO2; {&2419}
<G45023a> ISOPBO2    + HO2 = ISOPBOOH                                                : {%TrG} k_RO2_HO2(temp,5)*(1.-r_CHOHCH2O2_OH); {&3264}
<G45023b> ISOPBO2    + HO2 = MVK + HCHO + HO2 + OH                                   : {%TrG} k_RO2_HO2(temp,5)*r_CHOHCH2O2_OH; {&3264}
<G45024a> ISOPBO2    + NO  = MVK + HCHO + HO2 + NO2                                  : {%TrG} KRO2NO*(1.-alpha_AN(6,3,0,0,0,temp,cair)); {&3158, 3264}
<G45024b> ISOPBO2    + NO  = ISOPBNO3                                                : {%TrG} KRO2NO*alpha_AN(6,3,0,0,0,temp,cair); {&3158, 3264}
<G45025>  ISOPBO2    + NO3 = MVK + .75 HCHO + .75 HO2 + .25 CH3 + NO2                : {%TrG} KRO2NO3; {&2419}
<G45026a> ISOPBOOH + OH    = LIEPOX + OH                                             : {%TrG} (k_ads+k_adp)*a_CH2OOH; {&3151, 3264}
<G45026b> ISOPBOOH + OH    = ISOPBO2                                                 : {%TrG} k_ROOHRO; {&3264}
<G45026c> ISOPBOOH + OH    =  MGLYOX + HOCH2CHO                                      : {%TrG} k_ROHRO+k_s*f_alk*f_sOH; {&3264}
<G45027>  ISOPBOOH + O3    = .1368 MACROOH + .1368 H2O2 + .2280 HO2 + .4332 ACETOL + .2280 CO2 + .6384 OH + .2052 CO + .57 HCHO + .43 MACROOH + .06880 HO2 + .06880 OH + .2709 CO + .1591 CH2OO    : {%TrG} 1.E-17; {&3264}
<G45028>  ISOPBOH  + OH    = MVK + .75 HCHO + .75 HO2 + .25 CH3                      : {%TrG} k_s*f_alk*f_sOH+(k_adp+k_ads)*a_CH2OH; {&3264}
<G45029>  ISOPBNO3   + OH  = ISOPBDNO3O2                                             : {%TrG} (k_adt+k_adp)*f_CH2ONO2; {&3264}
<G45030>  ISOPDO2          = .8 MACR + .8 HCHO + .8 HO2 + .1 HCOC5 + .1 ISOPDOH      : {%TrG} k1_RO2ISOPDO2; {&2419}
<G45031a> ISOPDO2    + HO2 = ISOPDOOH                                                : {%TrG} k_RO2_HO2(temp,5)*(1.-r_CHOHCH2O2_OH); {&3264}
<G45031b> ISOPDO2    + HO2 = MACR + HCHO + HO2 + OH                                  : {%TrG} k_RO2_HO2(temp,5)*r_CHOHCH2O2_OH; {&3264}
<G45032a> ISOPDO2    + NO  = MACR + HCHO + HO2 + NO2                                 : {%TrG} KRO2NO*(1.-alpha_AN(6,2,0,0,0,temp,cair)); {&3158, 3264}
<G45032b> ISOPDO2    + NO  = ISOPDNO3                                                : {%TrG} KRO2NO*alpha_AN(6,2,0,0,0,temp,cair); {&3158, 3264}
<G45033>  ISOPDO2    + NO3 = MACR + HCHO + HO2 + NO2                                 : {%TrG} KRO2NO3; {&2419}
<G45034a> ISOPDOOH   + OH  = LIEPOX + OH                                             : {%TrG} (k_adt+k_adp)*a_CH2OOH; {&3151, 3264}
<G45034b> ISOPDOOH   + OH  = ISOPDO2                                                 : {%TrG} k_ROOHRO; {&3264}
<G45034c> ISOPDOOH   + OH  = HCOC5 + OH                                              : {%TrG} k_t*f_tOOH*f_allyl*f_pCH2OH; {&3264}
<G45034d> ISOPDOOH   + OH  = ACETOL + GLYOX + OH                                     : {%TrG} k_s*f_pCH2OH*f_sOH; {&3264}
<G45035>  ISOPDOOH   + O3  = 1.393 OH + BIACETOH + .67 HCHO + .05280 HO2 + .2079 CO + .1221 CH2OO  : {%TrG} 1.E-17; {&3264}
<G45036>  ISOPDOH    + OH  = HCOC5 + HO2                                             : {%TrG} 2.*k_ROHRO+(k_t*f_tOH*f_allyl+k_s*f_sOH)*f_pCH2OH+(k_adt+k_adp)*a_CH2OH; {&3264}
<G45037>  ISOPDNO3   + OH  = ISOPBDNO3O2                                             : {%TrG} (k_adp+k_ads)*a_CH2ONO2{§}; {&3264} // SAR estimate within uncertainty range of the experimentally determined rate constant by \citet{2093}, 4.2E-11.
<G45038>  NISOPO2          = .8 NC4CHO + .6 HO2 + .2 LISOPACNO3                      : {%TrG} k1_RO2LISOPACO2; {&2419}
<G45039>  NISOPO2    + HO2 = NISOPOOH                                                : {%TrG} k_RO2_HO2(temp,5); {&2419}
<G45040>  NISOPO2    + NO  = NC4CHO + HO2 + NO2                                      : {%TrG} KRO2NO; {&2419} // \alkylnitrateneglected
<G45041>  NISOPO2    + NO3 = NC4CHO + HO2 + NO2                                      : {%TrG} KRO2NO3; {&2419}
<G45042>  NISOPOOH   + OH  = NC4CHO + OH                                             : {%TrG} 1.03E-10; {&2419}
<G45043>  NC4CHO     + OH  = LNISO3                                                  : {%TrG} (k_adt+k_ads)*a_CHO*a_CH2ONO2; {&3264} // Old MCM rate constant 4.16E-11.
<G45044>  NC4CHO     + O3  = .27 NOA + .027 HCOCO2H + .0162 GLYOX + .0162 H2O2 + .1458 HCOCO + .0405 HCOOH + .0405 CO + .8758 OH + .365 MGLYOX + .73 NO2 + 0.7705 HCHO + .4055 CO2 + .73 GLYOX  : {%TrG} 2.40E-17; {&3264}
<G45045>  NC4CHO     + NO3 = LNISO3 + HNO3                                           : {%TrG} KNO3AL*4.25; {&2419}
<G45046>  LNISO3     + HO2 = LNISOOH                                                 : {%TrG} 0.5*k_RO2_HO2(temp,5)+0.5*KAPHO2; {&2419}
<G45047>  LNISO3     + NO  = NOA + .5 HOCHCHO + .5 CO + .5 HO2 + NO2 + .5 CO2        : {%TrG} 0.5*KAPNO+0.5*KRO2NO; {&2419} // \alkylnitrateneglected
<G45048>  LNISO3     + NO3 = NOA + .5 HOCHCHO + .5 CO + .5 HO2 + NO2 + .5 CO2        : {%TrG} KRO2NO3*1.37; {&2419}
<G45049>  LNISOOH    + OH  = LNISO3                                                  : {%TrG} 2.65E-11; {&2419}
<G45050a> LHC4ACCHO  + OH  = LC578O2                                                 : {%TrG} (k_adtertprim+k_ads)*a_CHO*a_CH2OH; {&3264}
<G45050b> LHC4ACCHO  + OH  = LHC4ACCO3                                               : {%TrG} k_t*f_O; {&3264}
<G45050c> LHC4ACCHO  + OH  = C4MDIAL + HO2                                           : {%TrG} k_s*f_sOH*f_allyl; {&3264}
<G45051>  LHC4ACCHO  + O3  = .2225 CH3CO + .89 CO + .0171875 HOCH2CO2H + .075625 H2O2 + .0171875 HCOCO2H + .2775 ACETOL + .6675 HO2 + .2603125 GLYOX + .2225 HCHO + .89 OH + .2603125 HOCH2CHO + .5 MGLYOX   : {%TrG} 2.40E-17; {&2419}
<G45052>  LHC4ACCHO  + NO3 = LHC4ACCO3 + HNO3                                        : {%TrG} KNO3AL*4.25; {&2419}
<G45053>  LC578O2          = .25 ACETOL + .75 MGLYOX + .25 HOCHCHO + .75 HOCH2CHO + .75 HO2 : {%TrG} k1_RO2tORO2; {&2419}
<G45054a> LC578O2    + HO2 = MGLYOX + HOCH2CHO + OH                                  : {%TrG} k_RO2_HO2(temp,5)*r_COCH2O2_OH; {&2419}
<G45054b> LC578O2    + HO2 = LC578OOH                                                : {%TrG} k_RO2_HO2(temp,5)*r_COCH2O2_OOH; {&2419}
<G45055>  LC578O2    + NO  = .25 ACETOL + .75 MGLYOX + .25 HOCHCHO + .75 HOCH2CHO + .75 HO2 + NO2 : {%TrG} KRO2NO; {&2419} // \alkylnitrateneglected
<G45056>  LC578O2    + NO3 = .25 ACETOL + .75 MGLYOX + .25 HOCHCHO + .75 HOCH2CHO + .75 HO2 + NO2 : {%TrG} KRO2NO3; {&2419}
<G45057>  LC578O2          = .25 ACETOL + .75 MGLYOX + .25 HOCH2CHO + .75 HOCH2CHO + HO2 + OH       : {%TrG} k_hsb; {&3264}
<G45058a> LC578OOH   + OH = LC578O2                                                  : {%TrG} k_ROOHRO; {&3264}
<G45058b> LC578OOH   + OH = C1ODC2OOHC4OD + HO2                                      : {%TrG} k_t*f_O*f_tCH2OH*f_alk+k_t*f_tOH*f_pCH2OH*f_pCH2OH+k_s*f_sOH*f_pCH2OH; {&3264}
<G45059a> LHC4ACCO3        = OH + .5 MACRO2 + .5 LHMVKABO2 + CO2                     : {%TrG} k1_RO2RCO3*0.9; {&3264}
<G45059b> LHC4ACCO3        = LHC4ACCO2H                                              : {%TrG} k1_RO2RCO3*0.1; {&3264}
<G45060a> LHC4ACCO3  + HO2 = 2 OH + .5 MACRO2 + .5 LHMVKABO2 + CO2                   : {%TrG} KAPHO2*r_CO3_OH; {&3264}
<G45060b> LHC4ACCO3  + HO2 = LHC4ACCO3H                                              : {%TrG} KAPHO2*r_CO3_OOH; {&3264}
<G45060c> LHC4ACCO3  + HO2 = LHC4ACCO2H + O3                                         : {%TrG} KAPHO2*r_CO3_O3; {&3264}
<G45061>  LHC4ACCO3  + NO  = .5 MACRO2 + .5 LHMVKABO2 + NO2  + CO2                   : {%TrG} KAPNO; {&3264}
<G45062>  LHC4ACCO3  + NO2 = LC5PAN1719                                              : {%TrG} k_CH3CO3_NO2; {&2419}
<G45063>  LHC4ACCO3  + NO3 = .5 MACRO2 + .5 LHMVKABO2 + NO2  + CO2                   : {%TrG} KRO2NO3*1.74; {&3264}
<G45064a> LHC4ACCO2H + OH  = OH + .5 MACRO2 + .5 LHMVKABO2  + CO2                    : {%TrG} 2.52E-11; {&3264}
<G45064b> LHC4ACCO3H + OH  = LHC4ACCO3                                               : {%TrG} 2.88E-11; {&2419}
<G45065>  LC5PAN1719       = LHC4ACCO3 + NO2                                         : {%TrG} k_PAN_M; {&2419}
<G45066>  LC5PAN1719 + OH  = .5 MACROH + .5 HO12CO3C4 + CO + NO2                     : {%TrG} 2.52E-11; {&2419}
<G45067>  HCOC5      + OH  = C59O2                                                   : {%TrG} 3.81E-11; {&2419}
<G45068>  HCOC5      + O3  = BIACETOH + .335 H2O2 + .67 HCHO + .2079 CO + .1221 CH2OO + .05280 OH   : {%TrG} 7.51E-16*EXP(-1521./temp); {&3264}
<G45069>  C59O2            = ACETOL + HOCH2CO                                        : {%TrG} k1_RO2tORO2; {&3264}
<G45070a> C59O2      + HO2 = OH + ACETOL + HOCH2CO                                   : {%TrG} k_RO2_HO2(temp,5)*r_COCH2O2_OH; {&3264}
<G45070b> C59O2      + HO2 = C59OOH                                                  : {%TrG} k_RO2_HO2(temp,5)*r_COCH2O2_OOH; {&3264}
<G45071>  C59O2      + NO  = ACETOL + HOCH2CO + NO2                                  : {%TrG} KRO2NO; {&3264} // \alkylnitrateneglected
<G45072>  C59O2      + NO3 = ACETOL + HOCH2CO + NO2                                  : {%TrG} KRO2NO3; {&3264}
<G45073>  C59OOH     + OH  = C59O2                                                   : {%TrG} 9.7E-12; {&2419}
<G45074>  LIEPOX     + OH  = DB1O + H2O                                              : {%TrG} 5.78E-11*EXP(-400./temp)*(1.52/3.+0.98*2./3.)/1.51; {&3151, 3178, 3264} // Formic acid production consistent with results of \citet{3178}. Here, the high yields of formic acid and hydroxycarbonyls at low NO from oxidation of cis-beta-LIEPOX (the most abundant isomer) are approximated with the production of DB1O which undergo both the Dibble double H-transfer to DB2O2 and HOCH2 elimination yielding \kpp{HVMK} and \kpp{HMAC} (keto-vinyl alcohol potentially arising from decomposition of the alkoxy radical resulting from the ring opening after H-abstraction). The rate constant is from \citet{3151} and adjusted based on \citet{3178} that determined the single rate constants for the cis- and trans- beta isomer.
<G45075>  ISOPBO2          = MVK + HCHO + OH                                         : {%TrG} k_hsb; {&3264}
<G45076>  ISOPDO2          = MACR + HCHO + OH                                        : {%TrG} k_hsd; {&3264}
<G45077a> LZCODC23DBCOOH + OH = .6 C1ODC2O2C4OOH + .4 C1OOHC2O2C4OD                  : {%TrG} k_adt*a_CHO*a_CH2OOH; {&3264}
<G45077b> LZCODC23DBCOOH + OH = .6 C1ODC3O2C4OOH + .4 C1OOHC3O2C4OD                  : {%TrG} k_ads*a_CHO*a_CH2OOH; {&3264}
<G45077c> LZCODC23DBCOOH + OH = LZCO3HC23DBCOD                                       : {%TrG} k_t*f_O*f_alk+k_ROOHRO; {&3264}
<G45077d> LZCODC23DBCOOH + OH = C4MDIAL + OH                                         : {%TrG} k_s*f_sOOH*f_allyl; {&3264}
<G45078>  LZCODC23DBCOOH + O3 = .4672 OH + .2336 CHOCOCH2O2 + .2336 CO + .2336 CH3CO + .4672 HOOCH2CHO + .1728 MGLYOX + .1901 OH + .0864 GLYOX + .02765 HOOCH2CHO + .02765 H2O2 + .02592 CH3OOH + .02592 CO2 + .01037 HCOCO + .01555 CH2OO + .01555 CO + .006908 HOOCH2CO3 + .2628 OH + .1314 MGLYOX + .1314 OH + .1314 HCOCOCH2OOH + .2628 GLYOX + .0972 HYPERACET + .00972 HCOCO2H + .005832 GLYOX + .005832 H2O2 + .05249 OH + .05249 HCOCO + .01458 HCHO + .01458 CO2 + .01458 HCOOH + .01458 CO : {%TrG} 2.4E-17; {&3264}
<G45079>  C1OOHC2O2C4OD        = .78 HYPERACET + .78 HOCHCHO + .22 CO2H3CHO + .22 HCHO + .22 OH             : {%TrG} k1_RO2tORO2; {&3264}
<G45080>  C1OOHC2O2C4OD + NO   = .78 HYPERACET + .78 HOCHCHO + .22 CO2H3CHO + .22 HCHO + .22 OH + NO2       : {%TrG} KRO2NO; {&3264} // \alkylnitrateneglected
<G45081a> C1OOHC2O2C4OD + HO2  = C1OOHC2OOHC4OD                                       : {%TrG} k_RO2_HO2(temp,5)*r_COCH2O2_OOH; {&3264}
<G45081b> C1OOHC2O2C4OD + HO2  = .78 HYPERACET + .78 HOCHCHO + .22 CO2H3CHO + .22 HCHO + 1.22 OH : {%TrG} k_RO2_HO2(temp,5)*r_COCH2O2_OH; {&3264}
<G45082>  C1OOHC2O2C4OD        = HYPERACET + GLYOX + OH                               : {%TrG} k_hsb; {&3264}
<G45083>  C1ODC2O2C4OOH        = OH + C1ODC2OOHC4OD                                   : {%TrG} k_15hsdhb; {&3264}
<G45084a> C1OOHC2OOHC4OD + OH  = C1ODC2OOHC4OD + OH                                   : {%TrG} 2.*k_s*f_sOOH*f_tCH2OH; {&3264}
<G45084b> C1OOHC2OOHC4OD + OH  = HYPERACET + 2 CO + 2 HO2 + OH                        : {%TrG} k_t*f_tOH*f_pCH2OH*f_pCH2OH; {&3264}
<G45084c> C1OOHC2OOHC4OD + OH  = C1OOHC2O2C4OD                                        : {%TrG} k_ROOHRO; {&3264}
<G45085>  C1ODC2OOHC4OD  + OH  = CO2H3CHO + CO + H2O + OH                             : {%TrG} k_t*f_O*f_tCH2OH+k_t*f_tOH*f_tOH*f_CHO; {&3264}
<G45086>  C1ODC3O2C4OOH        = MGLYOX + HOOCH2CHO + HO2                             : {%TrG} k1_RO2sORO2; {&3264}
<G45087>  C1ODC3O2C4OOH + NO   = MGLYOX + HOOCH2CHO + HO2 + NO2                       : {%TrG} KRO2NO; {&3264}
<G45088>  C1ODC3O2C4OOH + HO2  = .5 CH3CO + .5 CO + .5 MGLYOX + .5 HO2 + HOOCH2CO3    : {%TrG} k_RO2_HO2(temp,5); {&3264}
<G45089>  C1ODC3O2C4OOH        = MGLYOX + OH + HOOCH2CHO                              : {%TrG} k_hsd; {&3264}
<G45090>  C1OOHC3O2C4OD        = .625 MGLYOX + 2 CO + 1.625 HO2 + .375 CH3CO + .375 CO2 + OH : {%TrG} k_15hsdhb; {&3264}
<G45091>  LHC4ACCO3            = LZCO3HC23DBCOD + HO2   : {%TrG} k_16hs; {&3264}
<G45092a> C4MDIAL + OH         = C1ODC2O2C4OD           : {%TrG} (k_adt+k_ads)*a_CHO*a_CHO; {&3264} // C4MDIAL = CM4DIAL in MCM only from aromatics.
<G45092b> C4MDIAL + OH         = LZCO3C23DBCOD          : {%TrG} 2.*k_t*f_O*f_alk; {&3264} // Only one acyl peroxy radical considered.
<G45093>  C4MDIAL + NO3        = LZCO3C23DBCOD + HNO3   : {%TrG} KNO3AL*4.25*2.; {&3264} // Two aldehydic sites reacting with \kpp{NO3} but only one isomer product considered.
<G45094a> C1ODC2O2C4OD + HO2   = OH + MGLYOX + HOCHCHO  : {%TrG} k_RO2_HO2(temp,5)*r_COCH2O2_OH; {&3264}
<G45094b> C1ODC2O2C4OD + HO2   = C1ODC2OOHC4OD          : {%TrG} k_RO2_HO2(temp,5)*r_COCH2O2_OOH; {&3264}
<G45095>  C1ODC2O2C4OD + NO    = NO2 + MGLYOX + HOCHCHO : {%TrG} KRO2NO; {&3264} // \alkylnitrateneglected
<G45096>  C1ODC2O2C4OD         = MGLYOX + HOCHCHO       : {%TrG} k1_RO2tORO2; {&3264}
<G45097a> C1ODC2OOHC4OD + OH   = MGLYOX + 2 CO          : {%TrG} (2.*k_t*f_O*f_tCH2OH*f_alk+k_t*f_tOH*f_CHO*f_pCH2OH)*.5; {&3264}
<G45097b> C1ODC2OOHC4OD + OH   = MGLYOX + 2 CO + OH     : {%TrG} (2.*k_t*f_O*f_tCH2OH*f_alk+k_t*f_tOH*f_CHO*f_pCH2OH)*.5; {&3264}
<G45098>  LISOPACNO3O2 + NO    = .21 NOA + .21 HOCH2CHO + .21 HO2 + .49 HO12CO3C4 + .49 HCHO + .49 NO2 + .045 MVKNO3 + .045 HCHO + .255 ACETOL + .255 NO3CH2CHO + .225 H2O2 + NO2 : {%TrG} KRO2NO; {&3264} // \alkylnitrateneglected
<G45099>  LISOPACNO3O2         = .21 NOA + .21 HOCH2CHO + .21 HO2 + .49 HO12CO3C4 + .49 HCHO + .49 NO2 + .045 MVKNO3 + .045 HCHO + .255 ACETOL + .255 NO3CH2CHO + .225 H2O2 : {%TrG} k1_RO2tORO2+k_RO2_HO2(temp,5)*c(ind_HO2); {&3264}
<G45100>  ISOPBDNO3O2 + NO     = .6 ACETOL + .6 HOCH2CHO + .26 MACRNO3 + .14 MVKNO3 + .4 HCHO + .4 HO2 + 1.6 NO2 : {%TrG} KRO2NO; {&3264} // \alkylnitrateneglected
<G45101>  ISOPBDNO3O2          = .6 ACETOL + .6 HOCH2CHO + .26 MACRNO3 + .14 MVKNO3 + .4 HCHO + .4 HO2 + .6 NO2 : {%TrG} k1_RO2sORO2+k_RO2_HO2(temp,5)*c(ind_HO2); {&3264}
<G45102>  LISOPACNO3 + O3      = .8704 OH + .365 HO2 + .73 MGLYOX + .4325 NO3CH2CHO + .135 ACETOL + .0675 GLYOX + .4325 NO2 + .0891 H2O2 + .135 NOA + .0675 HOCHCHO + .3866 HOCH2CHO + .0405 CH3OH + .0405 CO + .0054 HOCH2CO    : {%TrG} 2.8E-17{§1.14}; {&3157, 3264}
<G45103>  DB1O2               = DB1O                                                           : {%TrG} k1_RO2sORO2; {&3264}
<G45104a> DB1O2    + HO2      = DB1OOH                                                         : {%TrG} k_RO2_HO2(temp,5)*(1.-r_CHOHCH2O2_OH); {&3264} // \kpp{DB1OOH} is a hydroperoxide bearing a vinyl alcohol moiety that upon reaction with OH yields HCOOH \citep{2001}.
<G45104b> DB1O2    + HO2      = DB1O + OH                                                      : {%TrG} k_RO2_HO2(temp,5)*r_CHOHCH2O2_OH; {&3264}
<G45105a> DB1O2    + NO       = DB1O + NO2                                                     : {%TrG} KRO2NO*(1.-alpha_AN(7,2,0,0,0,temp,cair)); {&3264}
<G45105b> DB1O2    + NO       = DB1NO3                                                         : {%TrG} KRO2NO*alpha_AN(7,2,0,0,0,temp,cair); {&3264}
<G45106>  DB1O2    + NO3      = DB1O + NO2                                                     : {%TrG} KRO2NO3; {&3264}
<G45107>  DB1O2               = DB2O2 + OH                                                     : {%TrG} 1.E4; {&3181} // OH production here is to take into account the hydroperoxidic function formed by the shift of the enolic hydrogen and not present in DB2O2. This approximation leads to spurious \chem{HO_2} production.
<G45108a> DB1O                = DB2O2                                                          : {%TrG} KDEC*0.72; // Consistent with the results of \citet{3178}.
<G45108b> DB1O                = .5 HVMK + .5 HMAC + HCHO + HO2                                 : {%TrG} KDEC*0.28; // Consistent with the results of \citet{3178}. Assuming that the enol alkoxy radical partly decomposes yielding a substitute vinyl alcohol.
<G45109>  DB2O2               = .48 ACETOL + .52 HOCH2CHO + .52 MGLYOX + .48 GLYOX + HO2       : {%TrG} k1_RO2sORO2; {&3264}
<G45110a> DB2O2    + HO2      = DB2OOH                                                         : {%TrG} k_RO2_HO2(temp,5)*(1.-r_CHOHCH2O2_OH); {&3264}
<G45110b> DB2O2    + HO2      = .48 ACETOL + .52 HOCH2CHO + .52 MGLYOX + .48 GLYOX + HO2 + OH  : {%TrG} k_RO2_HO2(temp,5)*r_CHOHCH2O2_OH; {&3264}
<G45111>  DB2O2    + NO       = .48 ACETOL + .52 HOCH2CHO + .52 MGLYOX + .48 GLYOX + HO2 + NO2 : {%TrG} KRO2NO; // \alkylnitrateneglected
<G45112>  DB2O2    + NO3      = .48 ACETOL + .52 HOCH2CHO + .52 MGLYOX + .48 GLYOX + HO2 + NO2 : {%TrG} KRO2NO3; {&3264}
<G45113>  DB2O2               = .48 MACROOH + .52 LHMVKABOOH + CO + OH                         : {%TrG} k_14hsal; {&3264}
<G45114a> DB1OOH   + OH       = DB1O2                                                          : {%TrG} k_ROOHRO; {&3264}
<G45114b> DB1OOH   + OH       = HCOOH + HO2 + CH3COCHO2CHO                                     : {%TrG} k_adt; {&3264} // Here, formic acid is mechanistically produced by the \chem{OH}-addition to the vinyl alcohol which, upon \chem{RO_2}-to-\chem{RO} conversion (skipped here), yields the HOCHOH fragment which in turn reacts with \chem{O_2} forming \chem{HCOOH + HO_2}. Along \chem{CH_3COCHOOHCHO} should be produced but not in the mechanism. Only \kpp{CH3COCHO2CHO}. The rate constant is consistent with predictions by \citet{2140} for \chem{ENOL}. OH-addition to the OH-bearing carbon is considered the dominant channel as it is already for the \chem{ENOL} \citep{2140}.
<G45115>  DB1OOH + HCOOH      = C1ODC2OOHC4OD  + HCOOH                                         : {%TrG} 4.67E-26*(temp)**(3.286)*EXP(4509./(1.987*temp)){§}; {&3264, 3162} // Theoretical keto-enol tautomerization catalyzed by formic acid \citep{2040}. The product should be C1ODC3OOHC4OD but it is neglected in the mechanism.
<G45116>  DB1NO3   + OH       = HCOOH + NO2 + CH3COCHO2CHO                                     : {%TrG} k_adt; {&3264} // As for DB1OOH + OH.
<G45117>  DB2OOH   + OH       = DB2O2                                                          : {%TrG} k_ROOHRO; {&3264} // Additional sinks for DB2OOH are neglected.
<G45118>  LISOPACOOH + O3 = 1.3272 OH + .36986 HO2 + .0432 H2O2 + .08422 CO + .2025 CH3OOH + .01215 CH2OO  + .3704 HCHO + .00405 CH3OH + .0405 CO2 + .1825 HOCH2COCH2O2 + .365 MGLYOX + .3866 HOOCH2CHO + .135 ACETOL + .0675 GLYOX + .00324 HCOCO + .3866 HOCH2CHO + .135 HYPERACET  + .0675 HOCHCHO + .0054 HOCH2CO    : {%TrG} 4.829E-16; {&3264}
<G45119a> LZCO3HC23DBCOD + OH = .62 CO2H3CHO + .62 OH + .62 CO2 + .38 MGLYOX + .38 HCOCO3H + .38 HO2                            : {%TrG} k_adt*a_CHO*a_CO2H; {&3264}
<G45119b> LZCO3HC23DBCOD + OH = .62 CH3COCO3H + 1.24 CO + 1.24 HO2 + .38 MGLYOX + .38 HO2 + .38 CO + .38 HO2 + .38 OH + .38 CO2 : {%TrG} k_ads*a_CHO*a_CO2H; {&3264}
<G45120>  LISOPEFO2         = LISOPEFO           : {%TrG} k1_RO2pORO2; {&3264}
<G45121a> LISOPEFO2 + NO    = LISOPEFO + NO2     : {%TrG} KRO2NO*(1.-alpha_AN(6,1,0,0,0,temp,cair)); {&3264}
<G45121b> LISOPEFO2 + NO    = ISOPDNO3           : {%TrG} KRO2NO*alpha_AN(6,1,0,0,0,temp,cair); {&3264} // Nitrate assumed to be major isomer that is mostly similar to products of ISOPDO2-chemistry.
<G45122a> LISOPEFO2 + HO2   = .7143 ISOPDOOH + .2857 ISOPBOOH     : {%TrG} k_RO2_HO2(temp,5)*(1.-r_CHOHCH2O2_OH); {&3264}
<G45122b> LISOPEFO2 + HO2   = LISOPEFO + OH                       : {%TrG} k_RO2_HO2(temp,5)*r_CHOHCH2O2_OH; {&3264}
<G45123>  LISOPEFO2 + NO3   = LISOPEFO + NO2                      : {%TrG} KRO2NO3; {&3264}
<G45124>  LISOPEFO2         = .7143 MACR + .2857 MVK + HCHO + OH  : {%TrG} 0.7143*k_hsd+.2857*k_hsb; {&3264}
<G45125>  LISOPEFO          = .7143 MACR + .2857 MVK + HCHO + HO2 : {%TrG} KDEC; {&3264}
<G45126a> LISOPACO          = ME3FURAN + HO2                      : {%TrG} KDEC*0.37; {&3264, 3159, 3187}
<G45126b> LISOPACO          = .65 LHC4ACCHO + .65 HO2 + .35 DB1O2 : {%TrG} KDEC*(1.-0.37); {&3264, 3159, 3187}
<G45127a> LDISOPACO         = ME3FURAN + HO2                      : {%TrG} KDEC*0.37; {&3264, 3159, 3187}
<G45127b> LDISOPACO         = .65 LHC4ACCHO + .65 HO2 + .35 DB1O2 : {%TrG} KDEC*(1.-0.37); {&3264, 3159, 3187}
<G45128>  ME3FURAN + OH     = LME3FURANO2                         : {%TrG} 3.2E-11*EXP(310./temp); {&3264} // Rate constant by \citet{3206}. A lumped \chem{RO_2} that upon conversion to RO yields 100\% 2-methyl-butenedial (C4MDIAL) although \citet{3213} quantified a 38\% yield of the Z/E mixture.
<G45129>  ME3FURAN + NO3      = LME3FURANO2 + NO2         : {%TrG} 1.9E-11; {&3264, 1759} // As for 3METHYLFURAN + OH but with additional \chem{NO_2} production for mass conservation.
<G45130>  LME3FURANO2         = C4MDIAL + HO2             : {%TrG} k1_RO2sORO2; {&3264}
<G45131>  LME3FURANO2 + NO    = C4MDIAL + HO2 + NO2       : {%TrG} KRO2NO; {&3264} // \alkylnitrateneglected
<G45132>  LME3FURANO2 + HO2   = C4MDIAL + HO2             : {%TrG} k_RO2_HO2(temp,5); {&3264} // Hydroperoxide formation neglected.
<G45133>  LZCO3C23DBCOD       = .62 EZCH3CO2CHCHO + .38 EZCHOCCH3CHO2 + CO2            : {%TrG} k1_RO2RCO3; {&3264}
<G45134a> LZCO3C23DBCOD + HO2 = .62 EZCH3CO2CHCHO + .38 EZCHOCCH3CHO2 + CO2 + OH       : {%TrG} KAPHO2*r_CO3_OH; {&3264}
<G45134b> LZCO3C23DBCOD + HO2 = LZCO3HC23DBCOD                                         : {%TrG} KAPHO2*(r_CO3_OOH+r_CO3_O3); {&3264} // ZCO2HC23DBCOD formation is neglected. However, it is produced in MCM and in aromatic-related reactions under the name of MC3ODBCO2H.
<G45135>  LZCO3C23DBCOD  + NO  = .62 EZCH3CO2CHCHO + .38 EZCHOCCH3CHO2 + CO2 + NO2     : {%TrG} KAPNO; {&3264}
<G45136>  LZCO3C23DBCOD  + NO2 = LZCPANC23DBCOD                                        : {%TrG} k_CH3CO3_NO2; {&2419}
<G45137>  LZCO3C23DBCOD  + NO3 = .62 EZCH3CO2CHCHO + .38 EZCHOCCH3CHO2 + CO2 + NO2     : {%TrG} KRO2NO3*1.74; {&3264}
<G45138>  LZCPANC23DBCOD       = LZCO3C23DBCOD + NO2                                   : {%TrG} k_PAN_M; {&2419}
<G45139>  LZCPANC23DBCOD + OH  = .62 EZCH3CO2CHCHO + .38 EZCHOCCH3CHO2 + CO2 + NO2     : {%TrG} 2.52E-11; {&3264} // LZCPANC23DBCOD is assumed to react like LC5PAN1719.
// terpene-related (G45200...G45399):
<G45200>  C511O2           = CH3CO + HCOCH2CHO                : {%TrGTer} k1_RO2sORO2; {&2419}
<G45201>  C511O2 + NO      = CH3CO + HCOCH2CHO + NO2          : {%TrGTer} KRO2NO; {&2419} // \alkylnitrateneglected
<G45202a> C511O2 + HO2     = C511OOH                          : {%TrGTer} k_RO2_HO2(temp,5)*r_COCH2O2_OOH; {&2419, 3264}
<G45202b> C511O2 + HO2     = CH3CO + HCOCH2CHO + OH           : {%TrGTer} k_RO2_HO2(temp,5)*r_COCH2O2_OH; {&2419, 3264}
<G45203>  C511OOH + OH     = C511O2                           : {%TrGTer} 7.49E-11{§}; {&2419}
<G45204>  CO23C4CHO + OH   = CO23C4CO3                        : {%TrGTer} 6.65E-11{§}; {&2419}
<G45205>  CO23C4CHO + NO3  = CO23C4CO3 + HNO3                 : {%TrGTer} KNO3AL*5.5; {&2419}
<G45206>  CO23C4CO3        = BIACETO2 + CO2                   : {%TrGTer} k1_RO2RCO3; {&2419}
<G45207>  CO23C4CO3 + NO   = BIACETO2 + CO2 + NO2             : {%TrGTer} KAPNO; {&2419} // \alkylnitrateneglected
<G45208>  CO23C4CO3 + NO2  = C5PAN9                           : {%TrGTer} k_CH3CO3_NO2; {&2419}
<G45209a> CO23C4CO3 + HO2  = CO23C4CO3H                       : {%TrGTer} KAPHO2*(r_CO3_OOH+r_CO3_O3); {&2419}
<G45209b> CO23C4CO3 + HO2  = BIACETO2 + CO2 + OH              : {%TrGTer} KAPHO2*r_CO3_OH; {&2419}
<G45210>  C5PAN9           = CO23C4CO3 + NO2                  : {%TrGTer} k_PAN_M; {&2419}
<G45211>  C5PAN9 + OH      = CO23C3CHO + CO + NO2             : {%TrGTer} 3.12E-13{§}; {&2419}
<G45212>  C512O2           = C513O2                           : {%TrGTer} k1_RO2pRO2; {&2419}
<G45213>  C512O2 + HO2     = C512OOH                          : {%TrGTer} k_RO2_HO2(temp,5); {&2419}
<G45214>  C512O2 + NO      = C513O2 + NO2                     : {%TrGTer} KRO2NO; {&2419} // \alkylnitrateneglected
<G45215>  C512OOH + OH     = CO13C4CHO + OH                   : {%TrGTer} 1.01E-10{§}; {&2419}
<G45216>  C513O2           = GLYOX + HOC2H4CO3                : {%TrGTer} k1_RO2sORO2; {&2419}
<G45217>  C513O2 + NO      = GLYOX + HOC2H4CO3 + NO2          : {%TrGTer} KRO2NO; {&2419} // \alkylnitrateneglected
<G45218a> C513O2 + HO2     = C513OOH                          : {%TrGTer} k_RO2_HO2(temp,5)*r_COCH2O2_OOH; {&2419, 3264}
<G45218b> C513O2 + HO2     = GLYOX + HOC2H4CO3 + OH           : {%TrGTer} k_RO2_HO2(temp,5)*r_COCH2O2_OH; {&2419, 3264}
<G45219>  CO13C4CHO + OH   = CHOC3COCO3                       : {%TrGTer} 1.33E-10{§}; {&2419}
<G45220>  CO13C4CHO + NO3  = CHOC3COCO3 + HNO3                : {%TrGTer} 2.*KNO3AL*5.5; {&2419}
<G45221>  C513OOH + OH     = C513CO + OH                      : {%TrGTer} 9.23E-11{§}; {&2419}
<G45222>  CHOC3COCO3       = CHOC3COO2 + CO2                  : {%TrGTer} k1_RO2RCO3; {&2419}
<G45223>  CHOC3COCO3 + HO2 = CHOC3COOOH                       : {%TrGTer} KAPHO2; {&2419}
<G45224>  CHOC3COCO3 + NO2 = CHOC3COPAN                       : {%TrGTer} k_CH3CO3_NO2; {&2419}
<G45225>  CHOC3COCO3 + NO  = CHOC3COO2 + CO2 + NO2            : {%TrGTer} KAPNO; {&2419} // \alkylnitrateneglected
<G45226>  C513CO + OH      = HOC2H4CO3 + CO + CO              : {%TrGTer} 2.64E-11{§}; {&2419}
<G45227>  C514O2 + HO2     = C514OOH                          : {%TrGTer} k_RO2_HO2(temp,5); {&2419}
<G45228a> C514O2 + NO      = CO13C4CHO + HO2 + NO2            : {%TrGTer} KRO2NO*(1.-alpha_AN(7,2,0,1,0,temp,cair)); {&2419, 3264}
<G45228b> C514O2 + NO      = C514NO3                          : {%TrGTer} KRO2NO*alpha_AN(7,2,0,1,0,temp,cair); {&2419, 3264}
<G45229>  C514O2 + NO3     = CO13C4CHO + HO2 + NO2            : {%TrGTer} KRO2NO3; {&2419}
<G45230>  C514O2           = CO13C4CHO + HO2                  : {%TrGTer} k1_RO2sRO2; {&2419}
<G45231>  C514OOH + OH     = CO13C4CHO + OH                   : {%TrGTer} 1.10E-10{§}; {&2419}
<G45232>  C514NO3 + OH     = CO13C4CHO + NO2                  : {%TrGTer} 4.33E-11{§}; {&2419}
<G45233>  CHOC3COOOH + OH  = CHOC3COCO3                       : {%TrGTer} 7.55E-11{§}; {&2419}
<G45234>  CHOC3COPAN       = CHOC3COCO3 + NO2                 : {%TrGTer} k_PAN_M; {&2419}
<G45235>  CHOC3COPAN + OH  = C4CODIAL + CO + NO2              : {%TrGTer} 7.19E-11{§}; {&2419}
<G45236>  MBO + OH         = LMBOABO2                         : {%TrGTer} 8.1E-12*EXP(610./temp); {&2419, 3264} // LMBOABO2 = 0.67 MBOAO2 + 0.33 MBOBO2
<G45237a> MBO + O3         = HCHO + .16 CH3COCH3 + .16 HO2 + .16 CO + .16 OH + .84 MBOOO   : {%TrGTer} 1.0E-17*0.57; {&2419, 3264}
<G45237b> MBO + O3         = IBUTALOH + .63 CO + .37 HOCH2OOH + .16 OH + .16 HO2           : {%TrGTer} 1.0E-17*0.43; {&2419, 3264}
<G45238>  MBO + NO3        = LNMBOABO2                        : {%TrGTer} 4.6E-14*EXP(-400./temp); {&2419, 3264}
<G45239>  LMBOABO2 + HO2   = LMBOABOOH                        : {%TrGTer} k_RO2_HO2(temp,5); {&2419, 3264}
<G45240a> LMBOABO2 + NO    = LMBOABNO3                        : {%TrGTer} KRO2NO*(.67*alpha_AN(7,2,0,0,0,temp,cair)+.33*alpha_AN(7,1,0,0,0,temp,cair)); {&2419, 3264}
<G45240b> LMBOABO2 + NO    = HOCH2CHO + CH3COCH3 + HO2 + NO2  : {%TrGTer} KRO2NO*(1.-(.67*alpha_AN(7,2,0,0,0,temp,cair)+.33*alpha_AN(7,1,0,0,0,temp,cair)))*.67; {&2419, 3264}
<G45240c> LMBOABO2 + NO    = IBUTALOH + HCHO + HO2 + NO2      : {%TrGTer} KRO2NO*(1.-(.67*alpha_AN(7,2,0,0,0,temp,cair)+.33*alpha_AN(7,1,0,0,0,temp,cair)))*.33; {&2419, 3264}
<G45241a> LMBOABO2         = HOCH2CHO + CH3COCH3 + HO2        : {%TrGTer} k1_RO2sORO2*.67; {&2419, 3264}
<G45241b> LMBOABO2         = IBUTALOH + HCHO + HO2            : {%TrGTer} k1_RO2pORO2*.33; {&2419, 3264}
<G45242a> LMBOABOOH + OH   = MBOACO                           : {%TrGTer} 0.67*2.93E-11+.33*2.05E-12; {&2419, 3264}
<G45242b> LMBOABOOH + OH   = LMBOABO2                         : {%TrGTer} k_ROOHRO; {&2419, 3264}
<G45243>  LMBOABNO3 + OH   = MBOACO + NO2                     : {%TrGTer} 0.67*1.75E-12+.33*2.69E-12; {&2419, 3264}
<G45244>  MBOACO + OH      = MBOCOCO + HO2                    : {%TrGTer} 3.79E-12; {&2419}
<G45245>  MBOCOCO + OH     = CO + IPRHOCO3                    : {%TrGTer} 1.38E-11; {&2419}
<G45246>  LNMBOABO2 + HO2  = LNMBOABOOH                       : {%TrGTer} k_RO2_HO2(temp,5); {&2419, 3264}
<G45247>  LNMBOABO2 + NO   = .65 NO3CH2CHO + .65 CH3COCH3 + .65 HO2 + .35 IBUTALOH + .35 HCHO + .35 NO2 + NO2 : {%TrGTer} KRO2NO; {&2419, 3264} // \alkylnitrateneglected
<G45248>  LNMBOABO2 + NO3  = .65 NO3CH2CHO + .65 CH3COCH3 + .65 HO2 + .35 IBUTALOH + .35 HCHO + .35 NO2 + NO2 : {%TrGTer} KRO2NO3; {&2419, 3264}
<G45249>  LNMBOABO2        = .65 NO3CH2CHO + .65 CH3COCH3 + .65 HO2 + .35 IBUTALOH + .35 HCHO + .35 NO2       : {%TrGTer} k1_RO2sORO2; {&2419, 3264}
<G45250a> LNMBOABOOH + OH  = .65 C4MCONO3OH + .35 NMBOBCO     : {%TrGTer} 0.65*4.89E-12+.35*2.52E-12; {&2419, 3264}
<G45250b> LNMBOABOOH + OH  = LNMBOABO2                        : {%TrGTer} k_ROOHRO; {&2419, 3264}
<G45251>  NMBOBCO + OH     = NC4OHCO3                         : {%TrGTer} 4.26E-12; {&2419}
<G45252a> NC4OHCO3 + HO2   = IBUTALOH + CO2 + NO2 + OH        : {%TrGTer} KAPHO2*r_CO3_OH; {&2419, 3264}
<G45252b> NC4OHCO3 + HO2   = NC4OHCO3H                        : {%TrGTer} KAPHO2*(r_CO3_O3+r_CO3_OOH); {&2419, 3264}
<G45253>  NC4OHCO3 + NO    = IBUTALOH + CO2 + NO2 + NO2       : {%TrGTer} KAPNO; {&2419}
<G45254>  NC4OHCO3 + NO2   = NC4OHCPAN                        : {%TrGTer} k_CH3CO3_NO2; {&2419}
<G45255>  NC4OHCO3 + NO3   = IBUTALOH + CO2 + NO2 + NO2       : {%TrGTer} KRO2NO3*1.74; {&2419}
<G45256>  NC4OHCO3         = IBUTALOH + CO2 + NO2             : {%TrGTer} k1_RO2RCO3; {&2419}
<G45257>  NC4OHCO3H + OH   = NC4OHCO3                         : {%TrGTer} 4.50E-12; {&2419}
<G45258>  NC4OHCPAN + OH   = IBUTALOH + CO + NO2 + NO2        : {%TrGTer} 1.27E-12; {&2419}
<G45259>  NC4OHCPAN        = NC4OHCO3 + NO2                   : {%TrGTer} k_PAN_M; {&2419}
<G45260>  C4MCONO3OH + OH  = CH3COCH3 + HCHO + CO2 + NO2      : {%TrGTer} 1.23E-12; {&2419, 3264}
// aromatics-related (G45400...G45599):
<G45400>  NC4MDCO2H  + OH     = MMALANHY + NO2                   : {%TrGAro} k_ROOHRO; {&2419} // KDEC NC4MDCO2 $\rightarrow$ MMALANHY + NO2
<G45401>  C54CO      + NO3    = 3 CO + CH3CO3 + HNO3             : {%TrGAro} KNO3AL*5.5; {&2419}
<G45402>  C54CO      + OH     = 3 CO + CH3CO3                    : {%TrGAro} 1.72E-11; {&2419}
<G45403a> NTLFUO2    + HO2    = NTLFUOOH                         : {%TrGAro} k_RO2_HO2(temp,5)*(1.-r_COCH2O2_OH); {&2419}
<G45403b> NTLFUO2    + HO2    = ACCOMECHO + NO2 + OH             : {%TrGAro} k_RO2_HO2(temp,5)*r_COCH2O2_OH; {&2419}
<G45404>  NTLFUO2    + NO     = ACCOMECHO + NO2 + NO2            : {%TrGAro} KRO2NO; {&2419} // KDEC NTLFUO $\rightarrow$ ACCOMECHO + NO2
<G45405>  NTLFUO2    + NO3    = ACCOMECHO + NO2 + NO2            : {%TrGAro} KRO2NO3; {&2419} // KDEC NTLFUO $\rightarrow$ ACCOMECHO + NO2
<G45406>  NTLFUO2             = ACCOMECHO + NO2                  : {%TrGAro} k1_RO2tORO2; {&2419} // KDEC NTLFUO $\rightarrow$ ACCOMECHO
<G45407>  C5134CO2OH + OH     = C54CO + HO2                      : {%TrGAro} 7.48E-11; {&2419}
<G45408>  C5COO2NO2  + OH     = MGLYOX + CO + CO + NO2           : {%TrGAro} 5.43E-11{§}; {&2419}
<G45409>  C5COO2NO2           = C5CO14O2 + NO2                   : {%TrGAro} k_PAN_M; {&2419} // KBPAN $\rightarrow$ k\_PAN\_M(renaming)
<G45410>  C5DIALOOH  + OH     = C5DIALCO + OH                    : {%TrGAro} 7.52E-11{§}; {&2419}
<G45411a> C4CO2DBCO3 + HO2    = C4CO2DCO3H                       : {%TrGAro} KAPHO2*(r_CO3_OOH+r_CO3_O3); {&2419}
<G45411b> C4CO2DBCO3 + HO2    = HO2 + CO + C33CO + CO2 + OH      : {%TrGAro} KAPHO2*r_CO3_OH; {&2419, 3264}
<G45412>  C4CO2DBCO3 + NO     = HO2 + CO + C33CO + CO2 + NO2     : {%TrGAro} KAPNO; {&2419}
<G45413>  C4CO2DBCO3 + NO2    = C4CO2DBPAN                       : {%TrGAro} k_CH3CO3_NO2; {&2419} // KFPAN $\rightarrow$ k\_CH3CO3\_NO2 (renaming)
<G45414>  C4CO2DBCO3 + NO3    = HO2 + CO + C33CO + CO2 + NO2     : {%TrGAro} KRO2NO3*1.74; {&2419}
<G45415>  C4CO2DBCO3          = HO2 + CO + C33CO + CO2           : {%TrGAro} k1_RO2RCO3; {&2419}
<G45416>  MMALANHY   + OH     = MMALANHYO2                       : {%TrGAro} 1.50E-12; {&2419}
<G45421a> MMALANHYO2 + HO2    = MMALNHYOOH                       : {%TrGAro} k_RO2_HO2(temp,5)*(1.-r_COCH2O2_OH-r_CHOHCH2O2_OH); {&2419, 3264}
<G45421b> MMALANHYO2 + HO2    = CO2H3CO3 + CO2 + OH              : {%TrGAro} k_RO2_HO2(temp,5)*(r_COCH2O2_OH+r_CHOHCH2O2_OH); {&2419, 3264}
<G45422>  MMALANHYO2 + NO     = CO2H3CO3 + CO2 + NO2             : {%TrGAro} KRO2NO; {&2419} // KDEC MMALANHYO$\rightarrow$CO2H3CO3
<G45423>  MMALANHYO2 + NO3    = CO2H3CO3 + CO2 + NO2             : {%TrGAro} KRO2NO3; {&2419} // KDEC MMALANHYO$\rightarrow$CO2H3CO3
<G45424>  MMALANHYO2          = CO2H3CO3 + CO2                   : {%TrGAro} k1_RO2tORO2; {&2419} // KDEC MMALANHYO$\rightarrow$CO2H3CO3 and Only major channel.
<G45428>  C4CO2DBPAN + OH     = C33CO + CO2 + CO + NO2           : {%TrGAro} 2.74E-11; {&2419}
<G45429>  C4CO2DBPAN          = C4CO2DBCO3 + NO2                 : {%TrGAro} k_PAN_M; {&2419} // KBPAN $\rightarrow$ k\_PAN\_M (renamed)
<G45430a> C5CO14O2   + HO2    = .83 MALANHY + .83 CH3 + .17 MGLYOX + .17 HO2 + .17 CO + .17 CO2 + OH : {%TrGAro} KAPHO2*r_CO3_OH; {&2419} // KDEC C5CO14CO2 $\rightarrow$ 0.83 MALANHY + 0.83 CH3 + 0.17 MGLYOX + 0.17 HO2 + 0.17 CO + 0.17 CO2
<G45430b> C5CO14O2   + HO2    = C5CO14OH + O3                    : {%TrGAro} KAPHO2*r_CO3_O3; {&2419}
<G45430c> C5CO14O2   + HO2    = C5CO14OOH                        : {%TrGAro} KAPHO2*r_CO3_OOH; {&2419}
<G45431>  C5CO14O2   + NO     = .83 MALANHY + .83 CH3 + .17 MGLYOX + .17 HO2 + .17 CO + .17 CO2 + NO2 : {%TrGAro} KAPNO; {&2419} // KDEC C5CO14CO2 $\rightarrow$ 0.83 MALANHY + 0.83 CH3 + 0.17 MGLYOX + 0.17 HO2 + 0.17 CO + 0.17 CO2
<G45432>  C5CO14O2   + NO2    = C5COO2NO2                        : {%TrGAro} k_CH3CO3_NO2; {&2419} // KFPAN $\rightarrow$k\_CH3CO3\_NO2 (renaming)
<G45433>  C5CO14O2   + NO3    = .83 MALANHY + .83 CH3 + .17 MGLYOX + .17 HO2 + .17 CO + .17 CO2 + NO2 : {%TrGAro} KRO2NO3*1.74; {&2419} // KDEC C5CO14CO2 $\rightarrow$ 0.83 MALANHY + 0.83 CH3 + 0.17 MGLYOX + 0.17 HO2 + 0.17 CO + 0.17 CO2
<G45434>  C5CO14O2            = .83 MALANHY + .83 CH3 + .17 MGLYOX + .17 HO2 + .17 CO + .17 CO2 : {%TrGAro} k1_RO2RCO3; {&2419} // KDEC C5CO14CO2 $\rightarrow$ 0.83 MALANHY + 0.83 CH3 + 0.17 MGLYOX + 0.17 HO2 + 0.17 CO + 0.17 CO2 and only major channel.
<G45436>  C5CO14OH   + OH     = .83 MALANHY + .83 CH3 + .17 MGLYOX + .17 HO2 + .17 CO + .17 CO2 : {%TrGAro} 5.44E-11; {&2419} // KDEC C5CO14CO2 $\rightarrow$ 0.83 MALANHY + 0.83 CH3 + 0.17 MGLYOX + 0.17 HO2 + 0.17 CO + 0.17 CO2
<G45441>  C5DICARB   + NO3    = C5CO14O2 + HNO3                  : {%TrGAro} KNO3AL*2.75; {&2419}
<G45442>  C5DICARB   + O3     = .5338 GLYOX + .063 CH3CHO + .348 CH3CO3 + .918 CO + .57 OH + .473 HO2 + .0563 CH3COCO2H + .5338 MGLYOX + .676 H2O2 + .063 HCHO + .0563 HCOCO2H + .2465 CO2 : {%TrGAro} 2.00E-18; {&2419}
<G45443>  C5DICARB   + OH     = .48 C5CO14O2 + .52 C5DICARBO2    : {%TrGAro} 6.2E-11; {&2419}
<G45444>  MC3ODBCO2H + OH     = .35 GLYOX + .35 CH3 + .35 CO + .35 CO2 + .65 MMALANHY + .65 HO2 : {%TrGAro} 4.38E-11; {&2419} // KDEC MC3CODBCO2 $\rightarrow$ 0.35 GLYOX + 0.35 CH3 + 0.35 CO + 0.35 CO2 + 0.65 MMALANHY + 0.65 HO2
<G45451>  TLFUONE    + NO3    = NTLFUO2                          : {%TrGAro} 1.00E-12; {&2419}
<G45452>  TLFUONE    + O3     = .5 CO + .5 OH + .5 MECOACETO2 + .3125 C24O3CCO2H + .1875 ACCOMECHO + .1875 H2O2 : {%TrGAro} 8.00E-19; // KDEC TLFUONOOA $\rightarrow$ 0.5 CO + 0.5 OH + 0.5 MECOACETO2 + 0.5 TLFUONOO and H2O subs TLFUONOO $\rightarrow$ 0.625 C24O3CCO2H + 0.375 ACCOMECHO + 0.375 H2O2
<G45453>  TLFUONE    + OH     = TLFUO2                           : {%TrGAro} 6.90E-11; {&2419}
<G45454a> ACCOMECO3  + HO2    = ACCOMECO3H                       : {%TrGAro} KAPHO2*(r_CO3_OOH+r_CO3_O3); {&2419}
<G45454b> ACCOMECO3  + HO2    = MECOACETO2 + CO2 + OH            : {%TrGAro} KAPHO2*r_CO3_OH; {&2419}
<G45455>  ACCOMECO3  + NO     = MECOACETO2 + CO2 + NO2           : {%TrGAro} KAPNO; {&2419}
<G45456>  ACCOMECO3  + NO2    = ACCOMEPAN                        : {%TrGAro} k_CH3CO3_NO2; {&2419} // KFPAN $\rightarrow$k\_CH3CO3\_NO2 (renaming)
<G45457>  ACCOMECO3  + NO3    = MECOACETO2 + CO2 + NO2           : {%TrGAro} KRO2NO3*1.74; {&2419}
<G45458>  ACCOMECO3           = MECOACETO2 + CO2                 : {%TrGAro} k1_RO2RCO3; {&2419}
<G45459>  C4CO2DCO3H + OH     = C4CO2DBCO3                       : {%TrGAro} 3.06E-11; {&2419}
<G45464>  ACCOMECHO  + NO3    = ACCOMECO3 + HNO3                 : {%TrGAro} KNO3AL*5.5; {&2419}
<G45465>  ACCOMECHO  + OH     = ACCOMECO3                        : {%TrGAro} 7.09E-11; {&2419}
<G45466>  MMALNHYOOH + OH     = MMALANHYO2                       : {%TrGAro} 1.69E-11; {&2419}
<G45467a> C5DICAROOH + OH     = C5134CO2OH + OH                  : {%TrGAro} 1.21E-10; {&2419}
<G45467b> C5DICAROOH + OH     = C5DICARBO2                       : {%TrGAro} k_ROOHRO; {&2419}
<G45468>  C24O3CCO2H + OH     = MECOACETO2 + CO2                 : {%TrGAro} 8.76E-13; {&2419}
<G45469>  NTLFUOOH   + OH     = NTLFUO2                          : {%TrGAro} 4.44E-12; {&2419}
<G45470>  ACCOMEPAN  + OH     = METACETHO + CO + CO + NO2        : {%TrGAro} 1.00E-14; {&2419}
<G45471>  ACCOMEPAN           = ACCOMECO3 + NO2                  : {%TrGAro} k_PAN_M; {&2419}
<G45476a> TLFUO2     + HO2    = TLFUOOH                          : {%TrGAro} k_RO2_HO2(temp,5)*(1.-r_COCH2O2_OH-r_CHOHCH2O2_OH); {&2419}
<G45476b> TLFUO2     + HO2    = ACCOMECHO + HO2 + OH             : {%TrGAro} k_RO2_HO2(temp,5)*(r_COCH2O2_OH+r_CHOHCH2O2_OH); {&2419} // KDEC NTLFUO $\rightarrow$ ACCOMECHO + NO2 and reactions with KRO2HO2.
<G45477>  TLFUO2     + NO     = ACCOMECHO + HO2 + NO2            : {%TrGAro} KRO2NO; {&2419} // KDEC NTLFUO $\rightarrow$ ACCOMECHO + NO2
<G45478>  TLFUO2     + NO3    = ACCOMECHO + HO2 + NO2            : {%TrGAro} KRO2NO3; {&2419} // KDEC NTLFUO $\rightarrow$ ACCOMECHO + NO2
<G45479>  TLFUO2              = ACCOMECHO + HO2                  : {%TrGAro} k1_RO2tORO2; {&2419} // KDEC NTLFUO $\rightarrow$ ACCOMECHO + NO2
<G45480>  C5CO14OOH  + OH     = C5CO14O2                         : {%TrGAro} 3.59E-12; {&2419}
<G45483>  TLFUOOH    + OH     = TLFUO2                           : {%TrGAro} 2.53E-11; {&2419}
<G45485>  ACCOMECO3H + OH     = ACCOMECO3                        : {%TrGAro} 3.59E-12; {&2419}
<G45486a> C5DIALO2   + HO2    = C5DIALOOH                        : {%TrGAro} k_RO2_HO2(temp,5)*(1.-r_COCH2O2_OH); {&2419}
<G45486b> C5DIALO2   + HO2    = MALDIAL + CO + HO2 + OH          : {%TrGAro} k_RO2_HO2(temp,5)*r_COCH2O2_OH; {&2419} // KDEC C5DIALO $\rightarrow$MALDIAL + CO + HO2 and reactions with KRO2HO2.
<G45487>  C5DIALO2   + NO     = MALDIAL + CO + HO2 + NO2         : {%TrGAro} KRO2NO; {&2419} // KDEC C5DIALO $\rightarrow$MALDIAL
<G45488>  C5DIALO2   + NO3    = MALDIAL + CO + HO2 + NO2         : {%TrGAro} KRO2NO3; {&2419} // KDEC C5DIALO $\rightarrow$MALDIAL
<G45489>  C5DIALO2            = MALDIAL + CO + HO2               : {%TrGAro} k1_RO2sORO2; {&2419} // KDEC C5DIALO $\rightarrow$MALDIAL
<G45490a> C5DICARBO2 + HO2    = C5DICAROOH                       : {%TrGAro} k_RO2_HO2(temp,5)*(r_CO3_OOH+r_CO3_O3); {&2419}
<G45491b> C5DICARBO2 + HO2    = MGLYOX + GLYOX + HO2 + OH        : {%TrGAro} k_RO2_HO2(temp,5)*r_CO3_OH; {&2419} // Reactions with KRO2HO2.
<G45492>  C5DICARBO2 + NO     = MGLYOX + GLYOX + HO2 + NO2       : {%TrGAro} KRO2NO; {&2419} // MGLYOX + GLYOX + HO2 from KDEC substitution
<G45493>  C5DICARBO2 + NO3    = MGLYOX + GLYOX + HO2 + NO2       : {%TrGAro} KRO2NO3; {&2419} // MGLYOX + GLYOX + HO2 from KDEC substitution
<G45494>  C5DICARBO2          = MGLYOX + GLYOX + HO2             : {%TrGAro} k1_RO2sORO2; {&2419} // Permutation reaction (minor channels removed).

// 6C (#G46nnn)
// terpene-related (G46200...G46399):
<G46200a> CO235C6O2 + HO2       = CO235C6OOH                       : {%TrGTer} k_RO2_HO2(temp,6)*r_COCH2O2_OOH; {&2419, 3264}
<G46200b> CO235C6O2 + HO2       = CO23C4CO3 + HCHO + OH            : {%TrGTer} k_RO2_HO2(temp,6)*r_COCH2O2_OH; {&2419, 3264}
<G46201>  CO235C6O2 + NO        = CO23C4CO3 + HCHO + NO2           : {%TrGTer} KRO2NO; {&2419} // \alkylnitrateneglected
<G46202>  CO235C6O2             = CO23C4CO3 + HCHO                 : {%TrGTer} k1_RO2pORO2; {&2419}
<G46203>  CO235C6OOH + OH       = CO235C6O2                        : {%TrGTer} 1.01E-11{§}; {&2419}
<G46204>  C614O2                = CO23C4CHO + HCHO + HO2           : {%TrGTer} k1_RO2sORO2; {&2419}
<G46205a> C614O2 + NO           = CO23C4CHO + HCHO + HO2 + NO2     : {%TrGTer} KRO2NO*(1.-alpha_AN(9,2,0,1,0,temp,cair)); {&2419}
<G46205b> C614O2 + NO           = C614NO3                          : {%TrGTer} KRO2NO*alpha_AN(9,2,0,1,0,temp,cair); {&2419}
<G46206a> C614O2 + HO2          = C614OOH                          : {%TrGTer} k_RO2_HO2(temp,6)*(1.-r_CHOHCH2O2_OH); {&2419, 3264}
<G46206b> C614O2 + HO2          = CO23C4CHO + HCHO + HO2 + OH      : {%TrGTer} k_RO2_HO2(temp,6)*r_CHOHCH2O2_OH; {&2419, 3264}
<G46207>  C614NO3 + OH          = C614CO + NO2                     : {%TrGTer} 7.11E-12{§}; {&2419}
<G46208>  C614OOH + OH          = C614CO + OH                      : {%TrGTer} 8.69E-11{§}; {&2419}
<G46209>  C614CO + OH           = CO235C5CHO + HO2                 : {%TrGTer} 3.22E-12{§}; {&2419}
<G46210>  CO235C5CHO + OH       = CO23C4CO3 + CO                   : {%TrGTer} 1.33E-11{§}; {&2419}
<G46211>  CO235C5CHO + NO3      = CO23C4CO3 + CO + HNO3            : {%TrGTer} KNO3AL*5.5; {&2419}
// aromatics-related (G46400...G46599):
<G46400>  PHENOOH    + OH     = PHENO2                             : {%TrGAro} 1.16E-10{§}; {&2419}
<G46401>  C6CO4DB    + OH     = CO + CO + HO2 + CO + C33CO         : {%TrGAro} 7.70E-11{§}; {&2419}
<G46402>  C5CO2DCO3H + OH     = C5CO2DBCO3                         : {%TrGAro} 3.60E-11{§}; {&2419}
<G46403>  NDNPHENOOH + OH     = NDNPHENO2                          : {%TrGAro} k_ROOHRO; {&2419}
<G46404a> C615CO2O2  + HO2    = C615CO2OOH                         : {%TrGAro} k_RO2_HO2(temp,6)*(1.-r_COCH2O2_OH); {&2419}
<G46404b> C615CO2O2  + HO2    = C5DICARB + CO + HO2 + OH           : {%TrGAro} k_RO2_HO2(temp,6)*r_COCH2O2_OH; {&2419} // Reactions with KRO2HO2 and KDEC C615CO2O $\rightarrow$ C5DICARB + CO + HO2.
<G46405>  C615CO2O2  + NO     = C5DICARB + CO + HO2 + NO2          : {%TrGAro} KRO2NO; {&2419} // KDEC C615CO2O $\rightarrow$ C5DICARB + CO + HO2
<G46406>  C615CO2O2  + NO3    = C5DICARB + CO + HO2 + NO2          : {%TrGAro} KRO2NO3; {&2419} // KDEC C615CO2O $\rightarrow$ C5DICARB + CO + HO2
<G46407>  C615CO2O2           = C5DICARB + CO + HO2                : {%TrGAro} k1_RO2sORO2; {&2419} // Only major channel.
<G46408>  BZEMUCPAN  + OH     = MALDIAL + CO + CO2 + NO2           : {%TrGAro} 4.05E-11{§}; {&2419}
<G46409>  BZEMUCPAN           = BZEMUCCO3 + NO2                    : {%TrGAro} k_PAN_M; {&2419}
<G46410>  BZBIPERNO3 + OH     = BZOBIPEROH + NO2                   : {%TrGAro} 7.30E-11{§}; {&2419}
<G46411>  HOC6H4NO2  + NO3    = NPHEN1O + HNO3                     : {%TrGAro} 9.00E-14{§}; {&2419}
<G46412>  HOC6H4NO2  + OH     = NPHEN1O                            : {%TrGAro} 9.00E-13{§}; {&2419}
<G46413a> NDNPHENO2  + HO2    = NDNPHENOOH                         : {%TrGAro} k_RO2_HO2(temp,6)*(1.-r_CHOHCH2O2_OH); {&2419}
<G46413b> NDNPHENO2  + HO2    = NC4DCO2H + HNO3 + CO + CO + NO2 + OH  : {%TrGAro} k_RO2_HO2(temp,6)*r_CHOHCH2O2_OH; {&2419} // Reactions with KRO2HO2 and KDEC NDNPHENO $\rightarrow$ NC4DCO2H + HNO3 + CO + CO + NO2.
<G46414>  NDNPHENO2  + NO     = NC4DCO2H + HNO3 + CO + CO + NO2 + NO2 : {%TrGAro} KRO2NO; {&2419} // KDEC NDNPHENO $\rightarrow$ NC4DCO2H + HNO3 + CO + CO + NO2
<G46415>  NDNPHENO2  + NO3    = NC4DCO2H + HNO3 + CO + CO + NO2 + NO2 : {%TrGAro} KRO2NO3; {&2419} // KDEC NDNPHENO $\rightarrow$ NC4DCO2H + HNO3 + CO + CO + NO2
<G46416>  NDNPHENO2           = NC4DCO2H + HNO3 + CO + CO + NO2    : {%TrGAro} k1_RO2ISOPDO2; {&2419} // KDEC NDNPHENO $\rightarrow$ NC4DCO2H + HNO3 + CO + CO + NO2
<G46417>  PBZQCO     + OH     = C5CO2OHCO3                         : {%TrGAro} 6.07E-11; {&2419}
<G46418>  CATECHOL   + NO3    = CATEC1O + HNO3                     : {%TrGAro} 9.9E-11; {&2419} // KDEC CATECOOA $\rightarrow$ MALDALCO2H + HCOCO2H + HO2 + OH
<G46419>  CATECHOL   + O3     = MALDALCO2H + HCOCO2H + HO2 + OH    : {%TrGAro} 9.2E-18; {&2419}
<G46420>  CATECHOL   + OH     = CATEC1O                            : {%TrGAro} 1.0E-10; {&2419}
<G46421>  C5COOHCO3H + OH     = C5CO2OHCO3                         : {%TrGAro} 8.01E-11; {&2419}
<G46422>  NCATECHOL  + NO3    = NNCATECO2                          : {%TrGAro} 2.60E-12; {&2419}
<G46423>  NCATECHOL  + OH     = NCATECO2                           : {%TrGAro} 3.47E-12; {&2419}
<G46424a> C5CO2OHCO3 + HO2    = C5COOHCO3H                         : {%TrGAro} KAPHO2*(r_CO3_OOH+r_CO3_O3); {&2419}
<G46424b> C5CO2OHCO3 + HO2    = HOCOC4DIAL + HO2 + CO + CO2 + OH   : {%TrGAro} KAPHO2*r_CO3_OH; {&2419}
<G46425>  C5CO2OHCO3 + NO     = HOCOC4DIAL + HO2 + CO + CO2 + NO2  : {%TrGAro} KAPNO; {&2419}
<G46426>  C5CO2OHCO3 + NO2    = C5CO2OHPAN                         : {%TrGAro} k_CH3CO3_NO2; {&2419} // KFPAN $\rightarrow$k\_CH3CO3\_NO2
<G46427>  C5CO2OHCO3 + NO3    = HOCOC4DIAL + HO2 + CO + CO2 + NO2  : {%TrGAro} KRO2NO3*1.74; {&2419}
<G46428>  C5CO2OHCO3          = HOCOC4DIAL + HO2 + CO + CO2        : {%TrGAro} k1_RO2RCO3; {&2419}
<G46429>  BZEPOXMUC  + NO3    = BZEMUCCO3 + HNO3                   : {%TrGAro} 2.*KNO3AL*2.75; {&2419}
<G46430>  BZEPOXMUC  + O3     = EPXC4DIAL + .125 HCHO + .1125 HCOCO2H + .0675 GLYOX + .0675 H2O2 + .82 HO2 + .57 OH + 1.265 CO + .25 CO2 : {%TrGAro} 2.00E-18; {&2419} // KDEC GLYOOA $\rightarrow$ .125 HCHO + .18 GLYOO + .82 HO2 + .57 OH + 1.265 CO
<G46431>  BZEPOXMUC  + OH     = .31 BZEMUCCO3 + .69 BZEMUCO2       : {%TrGAro} 6.08E-11; {&2419}
<G46432a> NCATECO2   + HO2    = NCATECOOH                          : {%TrGAro} k_RO2_HO2(temp,6)*(1.-r_CHOHCH2O2_OH); {&2419}
<G46432b> NCATECO2   + HO2    = NC4DCO2H + HCOCO2H + HO2 + OH      : {%TrGAro} k_RO2_HO2(temp,6)*r_CHOHCH2O2_OH; {&2419} // Reactions with KRO2HO2 and KDEC NCATECO $\rightarrow$ NC4DCO2H + HCOCO2H + HO2
<G46433>  NCATECO2   + NO     = NC4DCO2H + HCOCO2H + HO2 + NO2     : {%TrGAro} KRO2NO; {&2419} // KDEC NCATECO $\rightarrow$ NC4DCO2H + HCOCO2H + HO2
<G46434>  NCATECO2   + NO3    = NC4DCO2H + HCOCO2H + HO2 + NO2     : {%TrGAro} KRO2NO3; {&2419} // KDEC NCATECO $\rightarrow$ NC4DCO2H + HCOCO2H + HO2
<G46435>  NCATECO2            = NC4DCO2H + HCOCO2H + HO2           : {%TrGAro} k1_RO2ISOPDO2; {&2419} // KDEC NCATECO $\rightarrow$ NC4DCO2H + HCOCO2H + HO2
<G46436>  NPHEN1OOH  + OH     = NPHEN1O2                           : {%TrGAro} 9.00E-13; {&2419}
<G46437a> NPHENO2    + HO2    = NPHENOOH                           : {%TrGAro} k_RO2_HO2(temp,6)*(1.-r_CHOHCH2O2_OH); {&2419}
<G46437b> NPHENO2    + HO2    = MALDALCO2H + GLYOX + NO2 + OH      : {%TrGAro} k_RO2_HO2(temp,6)*r_CHOHCH2O2_OH; {&2419} // Reactions with KRO2HO2 and KDEC NPHENO $\rightarrow$ MALDALCO2H + GLYOX + NO2
<G46438>  NPHENO2    + NO     = MALDALCO2H + GLYOX + NO2 + NO2     : {%TrGAro} KRO2NO; {&2419} // KDEC NPHENO $\rightarrow$ MALDALCO2H + GLYOX + NO2
<G46439>  NPHENO2    + NO3    = MALDALCO2H + GLYOX + NO2 + NO2     : {%TrGAro} KRO2NO3; {&2419} // KDEC NPHENO $\rightarrow$ MALDALCO2H + GLYOX + NO2
<G46440>  NPHENO2             = MALDALCO2H + GLYOX + NO2           : {%TrGAro} k1_RO2ISOPDO2; {&2419} // KDEC NPHENO $\rightarrow$ MALDALCO2H + GLYOX + NO2
<G46441>  BENZENE    + OH     =  .352 BZBIPERO2 + .118 BZEPOXMUC   + .118 HO2 + .53 PHENOL + .53 HO2 : {%TrGAro} 2.3E-12*EXP(-190./temp); {&2419} // Merged equations.
<G46442>  C5CO2OHPAN + OH     = HOCOC4DIAL + CO + CO + NO2         : {%TrGAro} 7.66E-11; {&2419}
<G46443>  C5CO2OHPAN          = C5CO2OHCO3 + NO2                   : {%TrGAro} k_PAN_M; {&2419}
<G46444>  CATEC1O    + NO2    = NCATECHOL                          : {%TrGAro} k_C6H5O_NO2; {&2419, 3172}
<G46445>  CATEC1O    + O3     = CATEC1O2                           : {%TrGAro} k_C6H5O_O3; {&2419, 3171}
<G46446>  BZEMUCCO   + OH     = EPXDLCO3 + GLYOX                   : {%TrGAro} 9.20E-11; {&2419}
<G46447a> NNCATECO2  + HO2    = NNCATECOOH                         : {%TrGAro} k_RO2_HO2(temp,6)*(1.-r_CHOHCH2O2_OH); {&2419}
<G46447b> NNCATECO2  + HO2    = NC4DCO2H + HCOCO2H + NO2 + OH      : {%TrGAro} k_RO2_HO2(temp,6)*r_CHOHCH2O2_OH; {&2419} // reactions with KRO2HO2 and KDEC NNCATECO $\rightarrow$ NC4DCO2H + HCOCO2H + NO2
<G46448>  NNCATECO2  + NO     = NC4DCO2H + HCOCO2H + NO2 + NO2     : {%TrGAro} KRO2NO; {&2419} // KDEC NNCATECO $\rightarrow$ NC4DCO2H + HCOCO2H + NO2
<G46449>  NNCATECO2  + NO3    = NC4DCO2H + HCOCO2H + NO2 + NO2     : {%TrGAro} KRO2NO3; {&2419} // KDEC NNCATECO $\rightarrow$ NC4DCO2H + HCOCO2H + NO2
<G46450>  NNCATECO2           = NC4DCO2H + HCOCO2H + NO2           : {%TrGAro} k1_RO2ISOPDO2; {&2419} // KDEC NNCATECO $\rightarrow$ NC4DCO2H + HCOCO2H + NO2
<G46451>  BZEMUCCO2H + OH     = C5DIALO2 + CO2                     : {%TrGAro} 4.06E-11; {&2419}
<G46452>  NNCATECOOH + OH     = NNCATECO2                          : {%TrGAro} k_ROOHRO; {&2419}
<G46453>  NPHEN1O    + NO2    = DNPHEN                             : {%TrGAro} k_C6H5O_NO2; {&2419, 3172}
<G46454>  NPHEN1O    + O3     = NPHEN1O2                           : {%TrGAro} k_C6H5O_O3; {&2419, 3171}
<G46455>  DNPHEN     + NO3    = NDNPHENO2                          : {%TrGAro} 2.25E-15; {&2419}
<G46456>  DNPHEN     + OH     = DNPHENO2                           : {%TrGAro} 3.00E-14; {&2419}
<G46457>  PHENOL     + NO3    = .742 C6H5O + .742 HNO3 + .258 NPHENO2 : {%TrGAro} 3.8E-12; {&2419} // Merged equations.
<G46458>  PHENOL     + OH     = .06 C6H5O + .8 CATECHOL + .8 HO2 + .14 PHENO2 : {%TrGAro} 4.7E-13*EXP(1220./temp); {&2419} // Merged equations.
<G46459>  PBZQONE    + NO3    = NBZQO2                             : {%TrGAro} 3.00E-13; {&2419}
<G46460>  PBZQONE    + OH     = PBZQO2                             : {%TrGAro} 4.6E-12; {&2419}
<G46461a> PHENO2     + HO2    = PHENOOH                            : {%TrGAro} k_RO2_HO2(temp,6)*(1.-r_CHOHCH2O2_OH); {&2419}
<G46461b> PHENO2     + HO2    = .71 MALDALCO2H + .71 GLYOX + .29 PBZQONE + HO2 + OH  : {%TrGAro} k_RO2_HO2(temp,6)*r_CHOHCH2O2_OH; {&2419} // Reactions with KRO2HO2 and KDEC PHENO $\rightarrow$ 0.71 MALDALCO2H + 0.71 GLYOX + 0.29 PBZQONE + HO2
<G46462>  PHENO2     + NO     = .71 MALDALCO2H + .71 GLYOX + .29 PBZQONE + HO2 + NO2 : {%TrGAro} KRO2NO; {&2419} // KDEC PHENO $\rightarrow$ 0.71 MALDALCO2H + 0.71 GLYOX + 0.29 PBZQONE + HO2
<G46463>  PHENO2     + NO3    = .71 MALDALCO2H + .71 GLYOX + .29 PBZQONE + HO2 + NO2 : {%TrGAro} KRO2NO3; {&2419} // KDEC PHENO $\rightarrow$ 0.71 MALDALCO2H + 0.71 GLYOX + 0.29 PBZQONE + HO2
<G46464>  PHENO2              = .71 MALDALCO2H + .71 GLYOX + .29 PBZQONE + HO2 : {%TrGAro} k1_RO2ISOPDO2; {&2419} // KDEC PHENO $\rightarrow$ 0.71 MALDALCO2H + 0.71 GLYOX + 0.29 PBZQONE + HO2 and Only major channel.
<G46465>  C615CO2OOH + OH     = C6125CO + OH                       : {%TrGAro} 9.42E-11; {&2419}
<G46466a> C5CO2DBCO3 + HO2    = C5CO2DCO3H                         : {%TrGAro} KAPHO2*(r_CO3_OOH+r_CO3_O3); {&2419}
<G46466b> C5CO2DBCO3 + HO2    = CH3CO + C33CO + CO2 + OH           : {%TrGAro} KAPHO2*r_CO3_OH; {&2419}
<G46467>  C5CO2DBCO3 + NO     = CH3CO + C33CO + CO2 + NO2          : {%TrGAro} KAPNO; {&2419}
<G46468>  C5CO2DBCO3 + NO2    = C5CO2DBPAN                         : {%TrGAro} k_CH3CO3_NO2; {&2419} // KFPAN $\rightarrow$k\_CH3CO3\_NO2
<G46469>  C5CO2DBCO3 + NO3    = CH3CO + C33CO + CO2 + NO2          : {%TrGAro} KRO2NO3*1.74; {&2419}
<G46470>  C5CO2DBCO3          = CH3CO + C33CO + CO2                : {%TrGAro} k1_RO2RCO3; {&2419}
<G46471>  NPHEN1O2   + HO2    = NPHEN1OOH                          : {%TrGAro} k_RO2_HO2(temp,6); {&2419}
<G46472a> NPHEN1O2   + NO     = NPHEN1O + NO2                      : {%TrGAro} KRO2NO; {&2419}
<G46472b> NPHEN1O2   + NO2    = NPHEN1O + NO3                      : {%TrGAro} k_C6H5O2_NO2; {&3167} // new channel
<G46473>  NPHEN1O2   + NO3    = NPHEN1O + NO2                      : {%TrGAro} KRO2NO3; {&2419}
<G46474>  NPHEN1O2            = NPHEN1O                            : {%TrGAro} k1_RO2sRO2; {&2419}
<G46475>  NPHENOOH   + OH     = NPHENO2                            : {%TrGAro} 1.07E-10; {&2419}
<G46476>  C6H5O      + NO2    = HOC6H4NO2                          : {%TrGAro} k_C6H5O_NO2; {&2419, 3172} // HOC6H4NO2 is a nitro-phenol
<G46477>  C6H5O      + O3     = C6H5O2                             : {%TrGAro} k_C6H5O_O3; {&2419, 3171}
<G46478>  NCATECOOH  + OH     = NCATECO2                           : {%TrGAro} k_ROOHRO; {&2419}
<G46479>  PBZQOOH    + OH     = PBZQCO + OH                        : {%TrGAro} 1.23E-10; {&2419}
<G46480a> PBZQO2     + HO2    = PBZQOOH                            : {%TrGAro} k_RO2_HO2(temp,6)*(1.-r_CHOHCH2O2_OH-r_COCH2O2_OH); {&2419}
<G46480b> PBZQO2     + HO2    = C5CO2OHCO3 + OH                    : {%TrGAro} k_RO2_HO2(temp,6)*(r_CHOHCH2O2_OH+r_COCH2O2_OH); {&2419} // Reactions with KRO2HO2 and KDEC PBZQO $\rightarrow$C5CO2OHCO3
<G46481>  PBZQO2     + NO     = C5CO2OHCO3 + NO2                   : {%TrGAro} KRO2NO; {&2419} // KDEC PBZQO $\rightarrow$C5CO2OHCO3
<G46482>  PBZQO2     + NO3    = C5CO2OHCO3 + NO2                   : {%TrGAro} KRO2NO3; {&2419} // KDEC PBZQO $\rightarrow$C5CO2OHCO3
<G46483>  PBZQO2              = C5CO2OHCO3                         : {%TrGAro} k1_RO2sORO2; {&2419} // KDEC PBZQO $\rightarrow$C5CO2OHCO3 and Only major channel.
<G46484>  BZOBIPEROH + OH     = MALDIALCO3 + GLYOX                 : {%TrGAro} 8.16E-11; {&2419}
<G46485a> DNPHENO2   + HO2    = DNPHENOOH                          : {%TrGAro} k_RO2_HO2(temp,6)*(1.-r_CHOHCH2O2_OH); {&2419}
<G46485b> DNPHENO2   + HO2    = NC4DCO2H + HCOCO2H + NO2 + OH      : {%TrGAro} k_RO2_HO2(temp,6)*r_CHOHCH2O2_OH; {&2419} // Reactions with KRO2HO2 and KDEC DNPHENO $\rightarrow$ NC4DCO2H + HCOCO2H + NO2
<G46486>  DNPHENO2   + NO     = NC4DCO2H + HCOCO2H + NO2 + NO2     : {%TrGAro} KRO2NO; {&2419} // KDEC DNPHENO $\rightarrow$ NC4DCO2H + HCOCO2H + NO2
<G46487>  DNPHENO2   + NO3    = NC4DCO2H + HCOCO2H + NO2 + NO2     : {%TrGAro} KRO2NO3; {&2419} // KDEC DNPHENO $\rightarrow$ NC4DCO2H + HCOCO2H + NO2
<G46488>  DNPHENO2            = NC4DCO2H + HCOCO2H + NO2           : {%TrGAro} k1_RO2ISOPDO2; {&2419} // KDEC DNPHENO $\rightarrow$ NC4DCO2H + HCOCO2H + NO2
<G46489>  BZBIPEROOH + OH     = BZOBIPEROH + OH                    : {%TrGAro} 9.77E-11; {&2419}
<G46490a> BZEMUCO2   + HO2    = BZEMUCOOH                          : {%TrGAro} k_RO2_HO2(temp,6); {&2419}
<G46490b> BZEMUCO2   + HO2    = .5 EPXC4DIAL + .5 GLYOX + .5 HO2 + .5 C3DIALO2 + .5 C32OH13CO + OH : {%TrGAro} k_RO2_HO2(temp,6); {&2419} // Reactions with KRO2HO2 and KDEC BZEMUCO $\rightarrow$ 0.5 EPXC4DIAL + 0.5 GLYOX + 0.5 HO2 + 0.5 C3DIALO2 + 0.5 C32OH13CO.
<G46491a> BZEMUCO2   + NO     = BZEMUCNO3                          : {%TrGAro} KRO2NO*alpha_AN(10,2,0,1,0,temp,cair); {&2419}
<G46491b> BZEMUCO2   + NO     = .5 EPXC4DIAL + .5 GLYOX + .5 HO2 + .5 C3DIALO2 + .5 C32OH13CO + NO2 : {%TrGAro} KRO2NO*(1.-alpha_AN(10,2,0,1,0,temp,cair)); {&2419} // KDEC BZEMUCO $\rightarrow$ 0.5 EPXC4DIAL + 0.5 GLYOX + 0.5 HO2 + 0.5 C3DIALO2 + 0.5 C32OH13CO.
<G46492>  BZEMUCO2   + NO3    = .5 EPXC4DIAL + .5 GLYOX + .5 HO2 + .5 C3DIALO2 + .5 C32OH13CO + NO2 : {%TrGAro} KRO2NO3; {&2419} // KDEC BZEMUCO $\rightarrow$ 0.5 EPXC4DIAL + 0.5 GLYOX + 0.5 HO2 + 0.5 C3DIALO2 + 0.5 C32OH13CO
<G46493>  BZEMUCO2            = .5 EPXC4DIAL + .5 GLYOX + .5 HO2 + .5 C3DIALO2 + .5 C32OH13CO : {%TrGAro} k1_RO2sORO2; {&2419} // KDEC BZEMUCO $\rightarrow$ 0.5 EPXC4DIAL + 0.5 GLYOX + 0.5 HO2 + 0.5 C3DIALO2 + 0.5 C32OH13CO and Only major channel.
<G46494>  C5CO2DBPAN + OH     = C33CO + CH3CHO + CO2 + NO2         : {%TrGAro} 3.28E-11; {&2419}
<G46495>  C5CO2DBPAN          = C5CO2DBCO3 + NO2                   : {%TrGAro} k_PAN_M; {&2419}
<G46496>  NBZQOOH    + OH     = NBZQO2                             : {%TrGAro} 6.68E-11; {&2419}
<G46497>  CATEC1OOH  + OH     = CATEC1O2                           : {%TrGAro} k_ROOHRO; {&2419}
<G46498>  C6125CO    + OH     = C5CO14O2 + CO                      : {%TrGAro} 6.45E-11; {&2419}
<G46499a> NBZQO2     + HO2    = NBZQOOH                            : {%TrGAro} k_RO2_HO2(temp,6)*(1.-r_COCH2O2_OH); {&2419}
<G46499b> NBZQO2     + HO2    = C6CO4DB + NO2 + OH                 : {%TrGAro} k_RO2_HO2(temp,6)*r_COCH2O2_OH; {&2419} // Reactions with KRO2HO2 and KDEC NBZQO $\rightarrow$ C6CO4DB + NO2.
<G46500>  NBZQO2     + NO     = C6CO4DB + NO2 + NO2                : {%TrGAro} KRO2NO; {&2419} // KDEC NBZQO $\rightarrow$ C6CO4DB + NO2
<G46501>  NBZQO2     + NO3    = C6CO4DB + NO2 + NO2                : {%TrGAro} KRO2NO3; {&2419} // KDEC NBZQO $\rightarrow$ C6CO4DB + NO2
<G46502>  NBZQO2              = C6CO4DB + NO2                      : {%TrGAro} k1_RO2sORO2; {&2419} // KDEC NBZQO $\rightarrow$ C6CO4DB + NO2
<G46503>  DNPHENOOH  + OH     = DNPHENO2                           : {%TrGAro} k_ROOHRO; {&2419}
<G46504>  CATEC1O2   + HO2    = CATEC1OOH                          : {%TrGAro} k_RO2_HO2(temp,6); {&2419}
<G46505a> CATEC1O2   + NO     = CATEC1O + NO2                      : {%TrGAro} KRO2NO; {&2419}
<G46505b> CATEC1O2   + NO2    = CATEC1O + NO3                      : {%TrGAro} k_C6H5O2_NO2; {&3167} // New channel.
<G46506>  CATEC1O2   + NO3    = CATEC1O + NO2                      : {%TrGAro} KRO2NO3; {&2419}
<G46507>  CATEC1O2            = CATEC1O                            : {%TrGAro} k1_RO2sORO2; {&2419}
<G46508>  BZEMUCCO3H + OH     = BZEMUCCO3                          : {%TrGAro} 4.37E-11; {&2419}
<G46509>  C6H5OOH    + OH     = C6H5O2                             : {%TrGAro} 3.60E-12; {&2419}
<G46510>  BZEMUCOOH  + OH     = BZEMUCCO + OH                      : {%TrGAro} 1.31E-10; {&2419}
<G46511a> BZEMUCCO3  + HO2    = BZEMUCCO2H + O3                    : {%TrGAro} KAPHO2*r_CO3_O3; {&2419}
<G46511b> BZEMUCCO3  + HO2    = BZEMUCCO3H                         : {%TrGAro} KAPHO2*r_CO3_OOH; {&2419}
<G46511c> BZEMUCCO3  + HO2    = C5DIALO2 + CO2 + OH                : {%TrGAro} KAPHO2*r_CO3_OH; {&2419}
<G46512>  BZEMUCCO3  + NO     = C5DIALO2 + CO2 + NO2               : {%TrGAro} KAPNO; {&2419}
<G46513>  BZEMUCCO3  + NO2    = BZEMUCPAN                          : {%TrGAro} k_CH3CO3_NO2; {&2419}
<G46514>  BZEMUCCO3  + NO3    = C5DIALO2 + CO2 + NO2               : {%TrGAro} KRO2NO3*1.74; {&2419}
<G46515>  BZEMUCCO3           = C5DIALO2 + CO2                     : {%TrGAro} k1_RO2RCO3; {&2419} // Only major channel.
<G46516>  C6H5O2     + HO2    = C6H5OOH                            : {%TrGAro} k_RO2_HO2(temp,6); {&2419}
<G46517>  C6H5O2     + NO     = C6H5O + NO2                        : {%TrGAro} KRO2NO; {&2419}
<G46518>  C6H5O2     + NO3    = C6H5O + NO2                        : {%TrGAro} KRO2NO3; {&2419}
<G46519>  C6H5O2              = C6H5O                              : {%TrGAro} k1_RO2sRO2; {&2419}
<G46520>  C6H5O2     + NO2    = C6H5O + NO3                        : {%TrGAro} k_C6H5O2_NO2; {&3167}
<G46521>  BZEMUCNO3  + OH     = BZEMUCCO + NO2                     : {%TrGAro} 4.38E-11; {&2419}
<G46522a> BZBIPERO2  + HO2    = BZBIPEROOH                         : {%TrGAro} k_RO2_HO2(temp,6)*(1.-r_BIPERO2_OH); {&2419}
<G46522b> BZBIPERO2  + HO2    = OH + GLYOX + HO2 + .5 BZFUONE + .5 BZFUONE  : {%TrGAro} k_RO2_HO2(temp,6)*r_BIPERO2_OH; {&2419, 3188} // In analogy to \kpp{TLBIPERO2} from toluene \citep{3188}.
<G46523a> BZBIPERO2  + NO     = BZBIPERNO3                                  : {%TrGAro} KRO2NO*alpha_AN(9,2,0,0,1,temp,cair); {&2419}
<G46523b> BZBIPERO2  + NO     = NO2 + GLYOX + HO2 + .5 BZFUONE + .5 BZFUONE : {%TrGAro} KRO2NO*(1.-alpha_AN(9,2,0,0,1,temp,cair)); {&2419} // KDEC BZBIPERO $\rightarrow$ GLYOX + HO2 + 0.5 BZFUONE + 0.5 BZFUONE
<G46524>  BZBIPERO2  + NO3    = NO2 + GLYOX + HO2 + .5 BZFUONE + .5 BZFUONE : {%TrGAro} KRO2NO3; {&2419} // KDEC BZBIPERO $\rightarrow$ GLYOX + HO2 + 0.5 BZFUONE + 0.5 BZFUONE
<G46525>  BZBIPERO2           = GLYOX + HO2 + BZFUONE                       : {%TrGAro} k1_RO2sORO2; {&2419} // KDEC BZBIPERO $\rightarrow$ GLYOX + HO2 + 0.5 BZFUONE + 0.5 BZFUONE and Only major channel.

// 7C (#G47nnn)
// terpene-related (G47200...G47399):
<G47200>  CO235C6CHO + NO3    = CO235C6CO3 + HNO3                : {%TrGTer} KNO3AL*5.5; {&2419}
<G47201>  CO235C6CHO + OH     = CO235C6CO3                       : {%TrGTer} 6.70E-11{§}; {&2419}
<G47202a> CO235C6CO3 + HO2    = C235C6CO3H                       : {%TrGTer} KAPHO2*(r_CO3_OOH+r_CO3_O3); {&2419}
<G47202b> CO235C6CO3 + HO2    = CO235C6O2 + CO2 + OH             : {%TrGTer} KAPHO2*r_CO3_OH; {&2419}
<G47203>  CO235C6CO3 + NO     = CO235C6O2 + CO2 + NO2            : {%TrGTer} KAPNO; {&2419}
<G47204>  CO235C6CO3 + NO2    = C7PAN3                           : {%TrGTer} k_CH3CO3_NO2; {&2419}
<G47205>  CO235C6CO3          = CO235C6O2 + CO2                  : {%TrGTer} k1_RO2RCO3; {&2419}
<G47206>  C235C6CO3H + OH     = CO235C6CO3                       : {%TrGTer} 4.75E-12{§}; {&2419}
<G47207>  C7PAN3 + OH         = CO235C5CHO + CO + NO2            : {%TrGTer} 8.83E-13{§}; {&2419}
<G47208>  C7PAN3              = CO235C6CO3 + NO2                 : {%TrGTer} k_PAN_M; {&2419}
<G47209a> C716O2 + HO2        = C716OOH                          : {%TrGTer} k_RO2_HO2(temp,7)*r_COCH2O2_OOH; {&2419, 3264}
<G47209b> C716O2 + HO2        = CO13C4CHO + CH3CO + OH           : {%TrGTer} k_RO2_HO2(temp,7)*r_COCH2O2_OH; {&2419, 3264}
<G47210>  C716O2 + NO         = CO13C4CHO + CH3CO + NO2          : {%TrGTer} KRO2NO; {&2419} // \alkylnitrateneglected
<G47211>  C716O2              = CO13C4CHO + CH3CO                : {%TrGTer} k1_RO2sORO2; {&2419}
<G47212>  C716OOH + OH        = CO235C6CHO + OH                  : {%TrGTer} 1.20E-10{§}; {&2419}
<G47213>  C721O2 + HO2        = C721OOH                          : {%TrGTer} k_RO2_HO2(temp,7); {&2419}
<G47214>  C721O2 + NO         = C722O2 + NO2                     : {%TrGTer} KRO2NO; {&2419} // \alkylnitrateneglected
<G47215>  C721O2              = C722O2                           : {%TrGTer} k1_RO2pRO2; {&2419}
<G47216>  C721OOH + OH        = C721O2                           : {%TrGTer} 1.27E-11{§}; {&2419}
<G47217>  C722O2 + HO2        = C722OOH                          : {%TrGTer} k_RO2_HO2(temp,7); {&2419}
<G47218>  C722O2 + NO         = CH3COCH3 + C44O2 + NO2           : {%TrGTer} KRO2NO; {&2419} // \alkylnitrateneglected
<G47219>  C722O2              = CH3COCH3 + C44O2                 : {%TrGTer} k1_RO2tRO2; {&2419}
<G47220>  C722OOH + OH        = C722O2                           : {%TrGTer} 3.31E-11{§}; {&2419}
<G47221>  ROO6R3O2            = ROO6R5O2                         : {%TrGTer} 5.68E10{§}*EXP(-8745./temp); {&3019}
<G47222>  ROO6R3O2 + NO       = ROO6R3O + NO2                    : {%TrGTer} KRO2NO; {&3019} // \alkylnitrateneglected
<G47223>  ROO6R3O2 + HO2      = 7 LCARBON                        : {%TrGTer} k_RO2_HO2(temp,7); {&3019} // ROO6R3OOH produced but no sink for it.
<G47224>  ROO6R3O2            = ROO6R3O                          : {%TrGTer} k1_RO2sRO2; {&3019}
<G47225>  ROO6R3O             = 7 LCARBON + HO2                  : {%TrGTer} 5.7E10{§}*EXP(-2949./temp); {&3019} // ROO6R4P produced but no sink for it.
<G47226>  ROO6R5O2            = 7 LCARBON + OH                   : {%TrGTer} 9.17E10{§}*EXP(-8706./temp); {&3019} // ROO6R5P produced but no sink for it
// aromatics-related (G47400...G47599):
<G47400>  TOLUENE    + OH     = .07 C6H5CH2O2 + .18 CRESOL + .18 HO2 + .65 TLBIPERO2 + .10 TLEPOXMUC + .10 HO2 : {%TrGAro} 1.8E-12*EXP(340./temp); {&2419} // Merged.
<G47401>  C6H5CH2O2  + HO2    = C6H5CH2OOH                       : {%TrGAro} 1.5E-13*EXP(1310./temp); {&2419}
<G47402a> C6H5CH2O2  + NO     = C6H5CH2NO3                       : {%TrGAro} KRO2NO*alpha_AN(7,1,0,0,0,temp,cair); {&2419} // KROPRIM*O2 fast reaction C6H5CH2O = BENZAL + HO2.
<G47402b> C6H5CH2O2  + NO     = BENZAL + HO2 + NO2               : {%TrGAro} KRO2NO*(1.-alpha_AN(7,1,0,0,0,temp,cair)); {&2419} // KROPRIM*O2 fast reaction C6H5CH2O = BENZAL + HO2.
<G47403>  C6H5CH2O2  + NO3    = BENZAL + HO2 + NO2               : {%TrGAro} KRO2NO3; {&2419} // KROPRIM*O2 fast reaction C6H5CH2O = BENZAL + HO2.
<G47404>  C6H5CH2O2           = BENZAL + HO2                     : {%TrGAro} 2.*(k_CH3O2*2.4E-14*EXP(1620./temp))**(0.5)*RO2; {&2419} // KROPRIM*O2 fast reaction C6H5CH2O = BENZAL + HO2. C6H5CH2OH replaced by its oxidation product BENZAL.
<G47405>  CRESOL     + NO3    = .103 CRESO2 + .103 HNO3 + .506 NCRESO2 + .391 TOL1O + .391 HNO3 : {%TrGAro} 1.4E-11; {&2419} // Merged.
<G47406>  CRESOL     + OH     = .2 CRESO2 + .727 MCATECHOL + .727 HO2 + .073 TOL1O              : {%TrGAro} 4.65E-11; {&2419} // Merged.
<G47407a> TLBIPERO2  + HO2    = TLBIPEROOH                                                                                         : {%TrGAro} k_RO2_HO2(temp,7)*(1.-r_BIPERO2_OH); {&2419}
<G47407b> TLBIPERO2  + HO2    = OH + .6 GLYOX + .4 MGLYOX + HO2 + .2 C4MDIAL + .2 C5DICARB + .2 TLFUONE + .2 BZFUONE + .2 MALDIAL  : {%TrGAro} k_RO2_HO2(temp,7)*r_BIPERO2_OH; {&2419, 3188} // According to \citet{3188}, the branching ratio rbipero2\_oh is set to 0.4 in order to take into account the OH-recycling and summed yield of butendial and methylbutendial.
<G47408a> TLBIPERO2  + NO     = NO2 + .6 GLYOX + .4 MGLYOX + HO2 + .2 C4MDIAL + .2 C5DICARB + .2 TLFUONE + .2 BZFUONE + .2 MALDIAL : {%TrGAro} KRO2NO*(1.-alpha_AN(11,2,0,0,1,temp,cair)); {&2419} // KDEC TLBIPERO $\rightarrow$ 0.6 GLYOX + 0.4 MGLYOX + HO2 + 0.2 C4MDIAL + 0.2 C5DICARB + 0.2 TLFUONE + 0.2 BZFUONE + 0.2 MALDIAL
<G47408b> TLBIPERO2  + NO     = TLBIPERNO3                                     : {%TrGAro} KRO2NO*alpha_AN(11,2,0,0,1,temp,cair); {&2419} // KDEC TLBIPERO $\rightarrow$ 0.6 GLYOX + 0.4 MGLYOX + HO2 + 0.2 ZCODC23DB COD + 0.2 C5DICARB + 0.2 TLFUONE + 0.2 BZFUONE + 0.2 MALDIAL
<G47409>  TLBIPERO2  + NO3    = NO2 + .6 GLYOX + .4 MGLYOX + HO2 + .2 C4MDIAL + .2 C5DICARB + .2 TLFUONE + .2 BZFUONE + .2 MALDIAL : {%TrGAro} KRO2NO3; {&2419} // KDEC TLBIPERO $\rightarrow$ 0.6 GLYOX + 0.4 MGLYOX + HO2 + 0.2 ZCODC23DB COD + 0.2 C5DICARB + 0.2 TLFUONE + 0.2 BZFUONE + 0.2 MALDIAL
<G47410>  TLBIPERO2           = .6 GLYOX + .4 MGLYOX + HO2 + .2 C4MDIAL + .2 C5DICARB + .2 TLFUONE + .2 BZFUONE + .2 MALDIAL       : {%TrGAro} k1_RO2sORO2; {&2419} // Only major channel and KDEC TLBIPERO $\rightarrow$ 0.6 GLYOX + 0.4 MGLYOX + HO2 + 0.2 ZCODC23DB COD + 0.2 C5DICARB + 0.2 TLFUONE + 0.2 BZFUONE + 0.2 MALDIAL
<G47411>  TLEPOXMUC  + NO3    = TLEMUCCO3 + HNO3                 : {%TrGAro} KNO3AL*2.75; {&2419}
<G47412>  TLEPOXMUC  + O3     = EPXC4DIAL + .125 CH3CHO + .695 CH3CO + .57 CO + .57 OH + .125 HO2 + .1125 CH3COCO2H + .0675 MGLYOX + .0675 H2O2  + .25 CO2 : {%TrGAro} 5.00E-18; {&2419} // KDEC MGLOOB $\rightarrow$ 0.125 CH3CHO + 0.695 CH3CO + 0.57 CO + 0.57 OH + 0.125 HO2 + 0.18 MGLOO + 0.25 CO2
<G47413>  TLEPOXMUC  + OH     = .31 TLEMUCCO3 + .69 TLEMUCO2     : {%TrGAro} 7.99E-11; {&2419} // Merged.
<G47414>  C6H5CH2OOH + OH     = BENZAL + OH                      : {%TrGAro} 2.05E-11; {&2419}
<G47415>  C6H5CH2NO3 + OH     = BENZAL + NO2                     : {%TrGAro} 6.03E-12; {&2419}
<G47416>  BENZAL     + NO3    = C6H5CO3 + HNO3                   : {%TrGAro} 2.40E-15; {&2419}
<G47417>  BENZAL     + OH     = C6H5CO3                          : {%TrGAro} 5.9E-12*EXP(225./temp); {&2419}
<G47418a> CRESO2     + HO2    = CRESOOH                          : {%TrGAro} k_RO2_HO2(temp,7)*(1.-r_CHOHCH2O2_OH); {&2419}
<G47418b> CRESO2     + HO2    = .68 C5CO14OH + .68 GLYOX + HO2 + .32 PTLQONE + OH  : {%TrGAro} k_RO2_HO2(temp,7)*r_CHOHCH2O2_OH; {&2419} // Reactions with KRO2HO2 and KDEC CRESO $\rightarrow$ 0.68 C5CO14OH + 0.68 GLYOX + HO2 + 0.32 PTLQONE.
<G47419>  CRESO2     + NO     = .68 C5CO14OH + .68 GLYOX + HO2 + .32 PTLQONE + NO2 : {%TrGAro} KRO2NO; {&2419} // KDEC CRESO $\rightarrow$ 0.68 C5CO14OH + 0.68 GLYOX + HO2 + 0.32 PTLQONE
<G47420>  CRESO2     + NO3    = .68 C5CO14OH + .68 GLYOX + HO2 + .32 PTLQONE + NO2 : {%TrGAro} KRO2NO3; {&2419} // KDEC CRESO $\rightarrow$ 0.68 C5CO14OH + 0.68 GLYOX + HO2 + 0.32 PTLQONE
<G47421>  CRESO2              = .68 C5CO14OH + .68 GLYOX + HO2 + .32 PTLQONE       : {%TrGAro} k1_RO2ISOPDO2; {&2419} // KDEC CRESO $\rightarrow$ 0.68 C5CO14OH + 0.68 GLYOX + HO2 + 0.32 PTLQONE and Only major channel.
<G47422a> NCRESO2    + HO2    = NCRESOOH                         : {%TrGAro} k_RO2_HO2(temp,7)*(1.-r_CHOHCH2O2_OH); {&2419}
<G47422b> NCRESO2    + HO2    = C5CO14OH + GLYOX + NO2 + OH      : {%TrGAro} k_RO2_HO2(temp,7)*r_CHOHCH2O2_OH; {&2419} // Reactions with KRO2HO2 and KDEC NCRESO $\rightarrow$ C5CO14OH + GLYOX + NO2
<G47423>  NCRESO2    + NO     = C5CO14OH + GLYOX + NO2 + NO2     : {%TrGAro} KRO2NO; {&2419} // KDEC NCRESO $\rightarrow$ C5CO14OH + GLYOX + NO2
<G47424>  NCRESO2    + NO3    = C5CO14OH + GLYOX + NO2 + NO2     : {%TrGAro} KRO2NO3; {&2419} // KDEC NCRESO $\rightarrow$ C5CO14OH + GLYOX + NO2
<G47425>  NCRESO2             = C5CO14OH + GLYOX + NO2           : {%TrGAro} k1_RO2ISOPDO2; {&2419} // KDEC NCRESO $\rightarrow$ C5CO14OH + GLYOX + NO2 and Only major channel.
<G47426>  TOL1O      + NO2    = TOL1OHNO2                        : {%TrGAro} k_C6H5O_NO2; {&2419, 3172} // {TOL1OHNO2 is a nitro-phenol}
<G47427>  TOL1O      + O3     = OXYL1O2                          : {%TrGAro} k_C6H5O_O3; {&2419, 3171}
<G47428>  MCATECHOL  + NO3    = MCATEC1O + HNO3                  : {%TrGAro} 1.7E-10*1.0; {&2419}
<G47429>  MCATECHOL  + O3     = MC3ODBCO2H + HCOCO2H + HO2 + OH  : {%TrGAro} 2.8E-17; {&2419} // KDEC MCATECOOA $\rightarrow$ MC3ODBCO2H + HCOCO2H + HO2 + OH
<G47430>  MCATECHOL  + OH     = MCATEC1O                         : {%TrGAro} 2.0E-10*1.0; {&2419}
<G47431>  TLBIPEROOH + OH     = TLOBIPEROH + OH                  : {%TrGAro} 9.64E-11; {&2419}
<G47432>  TLBIPERNO3 + OH     = TLOBIPEROH + NO2                 : {%TrGAro} 7.16E-11; {&2419}
<G47433>  TLOBIPEROH + OH     = C5CO14O2 + GLYOX                 : {%TrGAro} 7.99E-11; {&2419}
<G47434a> TLEMUCCO3  + HO2    = C615CO2O2 + CO2 + OH             : {%TrGAro} KAPHO2*r_CO3_OH; {&2419}
<G47434b> TLEMUCCO3  + HO2    = TLEMUCCO2H + O3                  : {%TrGAro} KAPHO2*r_CO3_O3; {&2419}
<G47434c> TLEMUCCO3  + HO2    = TLEMUCCO3H                       : {%TrGAro} KAPHO2*r_CO3_OOH; {&2419}
<G47435>  TLEMUCCO3  + NO     = C615CO2O2  + CO2 + NO2           : {%TrGAro} KAPNO; {&2419}
<G47436>  TLEMUCCO3  + NO2    = TLEMUCPAN                        : {%TrGAro} k_CH3CO3_NO2; {&2419} // KFPAN $\rightarrow$k\_CH3CO3\_NO2
<G47437>  TLEMUCCO3  + NO3    = C615CO2O2  + CO2 + NO2           : {%TrGAro} KRO2NO3*1.74; {&2419}
<G47438>  TLEMUCCO3           = C615CO2O2  + CO2                 : {%TrGAro} k1_RO2RCO3; {&2419} // Only major channel.
<G47439a> TLEMUCO2   + HO2    = TLEMUCOOH                        : {%TrGAro} k_RO2_HO2(temp,7)*(1.-r_CHOHCH2O2_OH-r_COCH2O2_OH); {&2419}
<G47439b> TLEMUCO2   + HO2    = .5 C3DIALO2 + .5 CO2H3CHO + .5 EPXC4DIAL + .5 MGLYOX + .5 HO2 + OH  : {%TrGAro} k_RO2_HO2(temp,7)*(r_CHOHCH2O2_OH+r_COCH2O2_OH); {&2419} // Reactions with KRO2HO2 and KDEC TLEMUCO$\rightarrow$ 0.5 C3DIALO2 + 0.5 CO2H3CHO + 0.5 EPXC4DIAL + 0.5 MGLYOX + 0.5 HO2
<G47440a> TLEMUCO2   + NO     = TLEMUCNO3                                                           : {%TrGAro} KRO2NO*alpha_AN(11,2,1,0,0,temp,cair); {&2419}
<G47440b> TLEMUCO2   + NO     = .5 C3DIALO2 + .5 CO2H3CHO + .5 EPXC4DIAL + .5 MGLYOX + .5 HO2 + NO2 : {%TrGAro} KRO2NO*(1.-alpha_AN(11,2,1,0,0,temp,cair)); {&2419} // KDEC TLEMUCO$\rightarrow$ 0.5 C3DIALO2 + 0.5 CO2H3CHO + 0.5 EPXC4DIAL + 0.5 MGLYOX + 0.5 HO2
<G47441>  TLEMUCO2   + NO3    = .5 C3DIALO2 + .5 CO2H3CHO + .5 EPXC4DIAL + .5 MGLYOX + .5 HO2 + NO2 : {%TrGAro} KRO2NO3; {&2419} // KDEC TLEMUCO$\rightarrow$ 0.5 C3DIALO2 + 0.5 CO2H3CHO + 0.5 EPXC4DIAL + 0.5 MGLYOX + 0.5 HO2
<G47442>  TLEMUCO2            = .5 C3DIALO2 + .5 CO2H3CHO + .5 EPXC4DIAL + .5 MGLYOX + .5 HO2       : {%TrGAro} k1_RO2sORO2; {&2419} // KDEC TLEMUCO$\rightarrow$ 0.5 C3DIALO2 + 0.5 CO2H3CHO + 0.5 EPXC4DIAL + 0.5 MGLYOX + 0.5 HO2 and Only major channel.
<G47443a> C6H5CO3    + HO2    = C6H5CO3H                         : {%TrGAro} 1.1E-11*EXP(364./temp)*0.65 ; {&3201}
<G47443b> C6H5CO3    + HO2    = C6H5O2 + CO2 + OH                : {%TrGAro} 1.1E-11*EXP(364./temp)*0.20 ; {&3201}
<G47443c> C6H5CO3    + HO2    = PHCOOH + O3                      : {%TrGAro} 1.1E-11*EXP(364./temp)*0.15 ; {&3201}
<G47444>  C6H5CO3    + NO     = C6H5O2 + CO2 + NO2               : {%TrGAro} KAPNO; {&2419}
<G47445>  C6H5CO3    + NO2    = PBZN                             : {%TrGAro} k_CH3CO3_NO2; {&2419} // KFPAN $\rightarrow$k\_CH3CO3\_NO2
<G47446>  C6H5CO3    + NO3    = C6H5O2 + CO2 + NO2               : {%TrGAro} KRO2NO3*1.74; {&2419}
<G47447>  C6H5CO3             = C6H5O2 + CO2                     : {%TrGAro} k1_RO2RCO3; {&2419} // Only major channel.
<G47448>  CRESOOH    + OH     = CRESO2                           : {%TrGAro} 1.15E-10; {&2419}
<G47449>  NCRESOOH   + OH     = NCRESO2                          : {%TrGAro} 1.07E-10; {&2419}
<G47450>  TOL1OHNO2  + NO3    = NCRES1O + HNO3                   : {%TrGAro} 3.13E-13*1.0; {&2419}
<G47451>  TOL1OHNO2  + OH     = NCRES1O                          : {%TrGAro} 2.8E-12; {&2419}
<G47452>  OXYL1O2    + HO2    = OXYL1OOH                         : {%TrGAro} k_RO2_HO2(temp,7); {&2419}
<G47453>  OXYL1O2    + NO     = TOL1O + NO2                      : {%TrGAro} KRO2NO; {&2419}
<G47454>  OXYL1O2    + NO2    = TOL1O + NO3                      : {%TrGAro} k_C6H5O2_NO2; {&3167} // New channel.
<G47455>  OXYL1O2    + NO3    = TOL1O + NO2                      : {%TrGAro} KRO2NO3; {&2419}
<G47456>  OXYL1O2             = TOL1O                            : {%TrGAro} k1_RO2sRO2; {&2419}
<G47457>  MCATEC1O   + NO2    = MNCATECH                         : {%TrGAro} k_C6H5O_NO2; {&2419, 3172}
<G47458>  MCATEC1O   + O3     = MCATEC1O2                        : {%TrGAro} k_C6H5O_O3; {&2419, 3171}
<G47459>  TLEMUCCO2H + OH     = C615CO2O2 + CO2                  : {%TrGAro} 5.98E-11; {&2419}
<G47460>  TLEMUCCO3H + OH     = TLEMUCCO3                        : {%TrGAro} 6.29E-11; {&2419}
<G47461>  TLEMUCPAN  + OH     = C5DICARB + CO + CO2 + NO2        : {%TrGAro} 5.96E-11; {&2419}
<G47462>  TLEMUCPAN           = TLEMUCCO3 + NO2                  : {%TrGAro} k_PAN_M; {&2419}
<G47463>  TLEMUCOOH  + OH     = TLEMUCCO + OH                    : {%TrGAro} 7.04E-11; {&2419}
<G47464>  TLEMUCNO3  + OH     = TLEMUCCO + NO2                   : {%TrGAro} 3.06E-11; {&2419}
<G47465>  TLEMUCCO   + OH     = CH3CO + EPXC4DIAL + CO           : {%TrGAro} 4.06E-11; {&2419}
<G47466>  C6H5CO3H   + OH     = C6H5CO3                          : {%TrGAro} 4.66E-12; {&2419}
<G47467>  PHCOOH     + OH     = C6H5O2 + CO2                     : {%TrGAro} 1.10E-12; {&2419}
<G47468>  PBZN       + OH     = C6H5OOH + CO + NO2               : {%TrGAro} 1.06E-12; {&2419}
<G47469>  PBZN                = C6H5CO3 + NO2                    : {%TrGAro} k_PAN_M*0.67; {&2419}
<G47470>  PTLQONE    + NO3    = NPTLQO2                          : {%TrGAro} 1.00E-12; {&2419}
<G47471>  PTLQONE    + OH     = PTLQO2                           : {%TrGAro} 2.3E-11; {&2419}
<G47472>  NCRES1O    + NO2    = DNCRES                           : {%TrGAro} k_C6H5O_NO2; {&2419, 3172}
<G47473>  NCRES1O    + O3     = NCRES1O2                         : {%TrGAro} k_C6H5O_O3; {&2419, 3171}
<G47474>  OXYL1OOH   + OH     = OXYL1O2                          : {%TrGAro} 4.65E-11; {&2419}
<G47475>  MNCATECH   + NO3    = MNNCATECO2                       : {%TrGAro} 5.03E-12; {&2419}
<G47476>  MNCATECH   + OH     = MNCATECO2                        : {%TrGAro} 6.83E-12; {&2419}
<G47477>  MCATEC1O2  + HO2    = MCATEC1OOH                       : {%TrGAro} k_RO2_HO2(temp,7); {&2419}
<G47478>  MCATEC1O2  + NO     = MCATEC1O + NO2                   : {%TrGAro} KRO2NO; {&2419}
<G47479>  MCATEC1O2  + NO2    = MCATEC1O + NO3                   : {%TrGAro} k_C6H5O2_NO2; {&3167} // New channel.
<G47480>  MCATEC1O2  + NO3    = MCATEC1O + NO2                   : {%TrGAro} KRO2NO3; {&2419}
<G47481>  MCATEC1O2           = MCATEC1O                         : {%TrGAro} k1_RO2sORO2; {&2419}
<G47482a> NPTLQO2    + HO2    = NPTLQOOH                         : {%TrGAro} k_RO2_HO2(temp,7)*(1.-r_COCH2O2_OH); {&2419}
<G47482b> NPTLQO2    + HO2    = C7CO4DB + NO2 + OH               : {%TrGAro} k_RO2_HO2(temp,7)*r_COCH2O2_OH; {&2419} // Reactions with KRO2HO2 and KDEC NPTLQO $\rightarrow$ C7CO4DB + NO2
<G47483>  NPTLQO2    + NO     = C7CO4DB + NO2 + NO2              : {%TrGAro} KRO2NO; {&2419} // KDEC NPTLQO $\rightarrow$ C7CO4DB + NO2
<G47484>  NPTLQO2    + NO3    = C7CO4DB + NO2 + NO2              : {%TrGAro} KRO2NO3; {&2419} // KDEC NPTLQO $\rightarrow$ C7CO4DB + NO2
<G47485>  NPTLQO2             = C7CO4DB + NO2                    : {%TrGAro} k1_RO2sORO2; {&2419} // KDEC NPTLQO $\rightarrow$ C7CO4DB + NO2
<G47486a> PTLQO2     + HO2    = PTLQOOH                          : {%TrGAro} k_RO2_HO2(temp,7)*(1.-r_CHOHCH2O2_OH-r_COCH2O2_OH); {&2419}
<G47486b> PTLQO2     + HO2    = C6CO2OHCO3 + OH                  : {%TrGAro} k_RO2_HO2(temp,7)*(r_CHOHCH2O2_OH+r_COCH2O2_OH); {&2419} // Reactions with KRO2HO2 and KDEC PTLQO $\rightarrow$ C6CO2OHCO3
<G47487>  PTLQO2     + NO     = C6CO2OHCO3 + NO2                 : {%TrGAro} KRO2NO; {&2419} // KDEC PTLQO $\rightarrow$ C6CO2OHCO3
<G47488>  PTLQO2     + NO3    = C6CO2OHCO3 + NO2                 : {%TrGAro} KRO2NO3; {&2419} // KDEC PTLQO $\rightarrow$ C6CO2OHCO3
<G47489>  PTLQO2              = C6CO2OHCO3                       : {%TrGAro} k1_RO2sORO2; {&2419} // Only major channel. KDEC PTLQO $\rightarrow$ C6CO2OHCO3.
<G47490>  DNCRES     + NO3    = NDNCRESO2                        : {%TrGAro} 7.83E-15; {&2419}
<G47491>  DNCRES     + OH     = DNCRESO2                         : {%TrGAro} 5.10E-14; {&2419}
<G47492>  NCRES1O2   + HO2    = NCRES1OOH                        : {%TrGAro} k_RO2_HO2(temp,7); {&2419}
<G47493>  NCRES1O2   + NO     = NCRES1O + NO2                    : {%TrGAro} KRO2NO; {&2419}
<G47494>  NCRES1O2   + NO2    = NCRES1O + NO3                    : {%TrGAro} k_C6H5O2_NO2; {&3167} // New channel.
<G47495>  NCRES1O2   + NO3    = NCRES1O + NO2                    : {%TrGAro} KRO2NO3; {&2419}
<G47496>  NCRES1O2            = NCRES1O                          : {%TrGAro} k1_RO2sRO2; {&2419}
<G47497a> MNNCATECO2 + HO2    = MNNCATCOOH                       : {%TrGAro} k_RO2_HO2(temp,7)*(1.-r_CHOHCH2O2_OH); {&2419}
<G47497b> MNNCATECO2 + HO2    = NC4MDCO2H + HCOCO2H + NO2 + OH   : {%TrGAro} k_RO2_HO2(temp,7)*r_CHOHCH2O2_OH; {&2419} // Reactions with KRO2HO2 and KDEC MNNCATECO $\rightarrow$ NC4MDCO2H + HCOCO2H + NO2
<G47498>  MNNCATECO2 + NO     = NC4MDCO2H + HCOCO2H + NO2 + NO2  : {%TrGAro} KRO2NO; {&2419} // KDEC MNNCATECO $\rightarrow$ NC4MDCO2H + HCOCO2H + NO2
<G47499>  MNNCATECO2 + NO3    = NC4MDCO2H + HCOCO2H + NO2 + NO2  : {%TrGAro} KRO2NO3; {&2419} // KDEC MNNCATECO $\rightarrow$ NC4MDCO2H + HCOCO2H + NO2
<G47500>  MNNCATECO2          = NC4MDCO2H + HCOCO2H + NO2        : {%TrGAro} k1_RO2ISOPDO2; {&2419}
<G47501a> MNCATECO2  + HO2    = MNCATECOOH                       : {%TrGAro} k_RO2_HO2(temp,7)*(1.-r_CHOHCH2O2_OH); {&2419}
<G47501b> MNCATECO2  + HO2    = NC4MDCO2H + HCOCO2H + HO2 + OH   : {%TrGAro} k_RO2_HO2(temp,7)*r_CHOHCH2O2_OH; {&2419} // Reactions with KRO2HO2 and KDEC MNCATECO $\rightarrow$ NC4MDCO2H + HCOCO2H + HO2
<G47502>  MNCATECO2  + NO     = NC4MDCO2H + HCOCO2H + HO2 + NO2  : {%TrGAro} KRO2NO; {&2419} // KDEC MNCATECO $\rightarrow$ NC4MDCO2H + HCOCO2H + HO2
<G47503>  MNCATECO2  + NO3    = NC4MDCO2H + HCOCO2H + HO2 + NO2  : {%TrGAro} KRO2NO3; {&2419} // KDEC MNCATECO $\rightarrow$ NC4MDCO2H + HCOCO2H + HO2
<G47504>  MNCATECO2           = NC4MDCO2H + HCOCO2H + HO2        : {%TrGAro} k1_RO2ISOPDO2; {&2419} // KDEC MNCATECO $\rightarrow$ NC4MDCO2H + HCOCO2H + HO2
<G47505>  MCATEC1OOH + OH     = MCATEC1O2                        : {%TrGAro} 2.05E-10; {&2419}
<G47506>  NPTLQOOH   + OH     = NPTLQO2                          : {%TrGAro} 8.56E-11; {&2419}
<G47507>  PTLQOOH    + OH     = PTLQCO + OH                      : {%TrGAro} 1.42E-10; {&2419}
<G47508>  PTLQCO     + OH     = C6CO2OHCO3                       : {%TrGAro} 7.95E-11; {&2419}
<G47509a> NDNCRESO2  + HO2    = NDNCRESOOH                       : {%TrGAro} k_RO2_HO2(temp,7)*(1.-r_CHOHCH2O2_OH); {&2419}
<G47509b> NDNCRESO2  + HO2    = NC4MDCO2H + HNO3 + 2 CO + NO2 + OH  : {%TrGAro} k_RO2_HO2(temp,7)*r_CHOHCH2O2_OH; {&2419} // Reactions with KRO2HO2 and KDEC NDNCRESO $\rightarrow$ NC4MDCO2H + HNO3 + CO + CO + NO2
<G47510>  NDNCRESO2  + NO     = NC4MDCO2H + HNO3 + 2 CO + NO2 + NO2 : {%TrGAro} KRO2NO; {&2419} // KDEC NDNCRESO $\rightarrow$ NC4MDCO2H + HNO3 + CO + CO + NO2
<G47511>  NDNCRESO2  + NO3    = NC4MDCO2H + HNO3 + 2 CO + NO2 + NO2 : {%TrGAro} KRO2NO3; {&2419} // KDEC NDNCRESO $\rightarrow$ NC4MDCO2H + HNO3 + CO + CO + NO2
<G47512>  NDNCRESO2           = NC4MDCO2H + HNO3 + 2 CO + NO2       : {%TrGAro} k1_RO2ISOPDO2; {&2419} // KDEC NDNCRESO $\rightarrow$ NC4MDCO2H + HNO3 + CO + CO + NO2
<G47513a> DNCRESO2   + HO2    = DNCRESOOH                        : {%TrGAro} k_RO2_HO2(temp,7)*(1.-r_CHOHCH2O2_OH); {&2419}
<G47513b> DNCRESO2   + HO2    = NC4MDCO2H + HCOCO2H + NO2 + OH   : {%TrGAro} k_RO2_HO2(temp,7)*r_CHOHCH2O2_OH; {&2419} // Reactions with KRO2HO2 and KDEC DNCRESO $\rightarrow$ NC4MDCO2H + HCOCO2H + NO2
<G47514>  DNCRESO2   + NO     = NC4MDCO2H + HCOCO2H + NO2 + NO2  : {%TrGAro} KRO2NO; {&2419} // KDEC DNCRESO $\rightarrow$ NC4MDCO2H + HCOCO2H + NO2
<G47515>  DNCRESO2   + NO3    = NC4MDCO2H + HCOCO2H + NO2 + NO2  : {%TrGAro} KRO2NO3; {&2419} // KDEC DNCRESO $\rightarrow$ NC4MDCO2H + HCOCO2H + NO2
<G47516>  DNCRESO2            = NC4MDCO2H + HCOCO2H + NO2        : {%TrGAro} k1_RO2ISOPDO2; {&2419} // KDEC DNCRESO $\rightarrow$ NC4MDCO2H + HCOCO2H + NO2
<G47517>  NCRES1OOH  + OH     = NCRES1O2                         : {%TrGAro} 1.53E-12; {&2419}
<G47518>  MNNCATCOOH + OH     = MNNCATECO2                       : {%TrGAro} k_ROOHRO; {&2419}
<G47519>  MNCATECOOH + OH     = MNCATECO2                        : {%TrGAro} k_ROOHRO; {&2419}
<G47520>  C7CO4DB    + OH     = CO + CO + CH3CO + C33CO          : {%TrGAro} 9.58E-11; {&2419}
<G47521a> C6CO2OHCO3 + HO2    = C5134CO2OH + HO2 + CO + CO2 + OH : {%TrGAro} KAPHO2*r_CO3_OH; {&2419}
<G47521b> C6CO2OHCO3 + HO2    = C6COOHCO3H                       : {%TrGAro} KAPHO2*(r_CO3_OOH+r_CO3_O3); {&2419}
<G47522>  C6CO2OHCO3 + NO     = C5134CO2OH + HO2 + CO + CO2 + NO2 : {%TrGAro} KAPNO; {&2419}
<G47523>  C6CO2OHCO3 + NO2    = C6CO2OHPAN                       : {%TrGAro} k_CH3CO3_NO2; {&2419}
<G47524>  C6CO2OHCO3 + NO3    = C5134CO2OH + HO2 + CO + CO2 + NO2 : {%TrGAro} KRO2NO3*1.74; {&2419}
<G47525>  C6CO2OHCO3          = C5134CO2OH + HO2 + CO + CO2      : {%TrGAro} k1_RO2RCO3; {&2419}
<G47526>  NDNCRESOOH + OH     = NDNCRESO2                        : {%TrGAro} k_ROOHRO; {&2419}
<G47527>  DNCRESOOH  + OH     = DNCRESO2                         : {%TrGAro} k_ROOHRO; {&2419}
<G47528>  C6COOHCO3H + OH     = C6CO2OHCO3                       : {%TrGAro} 9.29E-11; {&2419}
<G47529>  C6CO2OHPAN + OH     = C5134CO2OH + CO + CO + NO2       : {%TrGAro} 8.96E-11; {&2419}
<G47530>  C6CO2OHPAN          = C6CO2OHCO3 + NO2                 : {%TrGAro} k_PAN_M; {&2419}

// 8C (#G48nnn)
// terpene-related (G48200...G48399):
<G48200>  C85O2               = C86O2                            : {%TrGTer} k1_RO2tRO2; {&2419}
<G48201>  C85O2 + HO2         = C85OOH                           : {%TrGTer} k_RO2_HO2(temp,8); {&2419}
<G48202>  C85O2 + NO          = C86O2 + NO2                      : {%TrGTer} KRO2NO; {&2419} // \alkylnitrateneglected
<G48203>  C85OOH + OH         = C85O2                            : {%TrGTer} 1.29E-11{§}; {&2419}
<G48204>  C86O2               = C511O2 + CH3COCH3                : {%TrGTer} k1_RO2tRO2; {&2419}
<G48205>  C86O2 + NO          = C511O2 + CH3COCH3 + NO2          : {%TrGTer} KRO2NO; {&2419} // \alkylnitrateneglected
<G48206>  C86O2 + HO2         = C86OOH                           : {%TrGTer} k_RO2_HO2(temp,8); {&2419}
<G48207>  C86OOH + OH         = C86O2                            : {%TrGTer} 3.45E-11{§}; {&2419}
<G48208>  C811O2              = C812O2                           : {%TrGTer} k1_RO2pRO2; {&2419}
<G48209>  C811O2 + HO2        = 8 LCARBON                        : {%TrGTer} k_RO2_HO2(temp,8); {&2419}
<G48210>  C811O2 + NO         = C812O2      + NO2                : {%TrGTer} KRO2NO; {&2419} // \alkylnitrateneglected
<G48211>  C812O2              = C813O2                           : {%TrGTer} k1_RO2tORO2; {&2419}
<G48212>  C812O2 + NO         = C813O2 + NO2                     : {%TrGTer} KRO2NO; {&2419} // \alkylnitrateneglected
<G48213>  C812O2 + HO2        = C812OOH                          : {%TrGTer} k_RO2_HO2(temp,8); {&2419}
<G48214>  C812OOH + OH        = C812O2                           : {%TrGTer} 1.09E-11{§}; {&2419}
<G48215>  C813O2              = CH3COCH3 + C512O2                : {%TrGTer} k1_RO2tRO2; {&2419}
<G48216>  C813O2 + NO         = CH3COCH3 + C512O2 + NO2          : {%TrGTer} KRO2NO; {&2419} // \alkylnitrateneglected
<G48217>  C813O2 + HO2        = C813OOH                          : {%TrGTer} k_RO2_HO2(temp,8); {&2419}
<G48218>  C813OOH + OH        = C813O2                           : {%TrGTer} 1.86E-11{§}; {&2419}
<G48219>  C721CHO + NO3       = C721CO3 + HNO3                   : {%TrGTer} KNO3AL*8.5; {&2419}
<G48220>  C721CHO + OH        = C721CO3                          : {%TrGTer} 2.63E-11{§}; {&2419}
<G48221a> C721CO3 + HO2       = C721CO3H                         : {%TrGTer} KAPHO2*r_CO3_OOH; {&2419}
<G48221b> C721CO3 + HO2       = C721O2 + CO2 + OH                : {%TrGTer} KAPHO2*r_CO3_OH; {&2419}
<G48221c> C721CO3 + HO2       = NORPINIC + O3                    : {%TrGTer} KAPHO2*r_CO3_O3; {&2419}
<G48222>  C721CO3 + NO        = C721O2 + CO2 + NO2               : {%TrGTer} KAPNO; {&2419} // \alkylnitrateneglected
<G48223>  C721CO3 + NO2       = C721PAN                          : {%TrGTer} k_CH3CO3_NO2; {&2419}
<G48224>  C721CO3 + NO3       = C721O2 + CO2 + NO2               : {%TrGTer} KRO2NO3*1.74; {&2419}
<G48225>  C721CO3             = C721O2 + CO2                     : {%TrGTer} k1_RO2RCO3*0.9; {&3264}
<G48226>  C721CO3             = NORPINIC                         : {%TrGTer} k1_RO2RCO3*0.1; {&3264}
<G48227>  C721CO3H + OH       = C721CO3                          : {%TrGTer} 9.65E-12{§}; {&2419}
<G48228>  NORPINIC + OH       = C721O2 + CO2                     : {%TrGTer} 6.57E-12{§}; {&2419}
<G48229>  C721PAN + OH        = C721OOH + CO + NO2               : {%TrGTer} 2.96E-12{§}; {&2419}
<G48230>  C721PAN             = C721CO3 + NO2                    : {%TrGTer} k_PAN_M; {&2419}
<G48231>  C8BC + OH           = C8BCO2                           : {%TrGTer} 3.04E-12{§}; {&2419}
<G48232>  C8BCO2 + HO2        = C8BCOOH                          : {%TrGTer} k_RO2_HO2(temp,8); {&2419}
<G48233a> C8BCO2 + NO         = C89O2 + NO2                      : {%TrGTer} KRO2NO*(1.-alpha_AN(8,2,0,0,0,temp,cair)); {&2419}
<G48233b> C8BCO2 + NO         = C8BCNO3                          : {%TrGTer} KRO2NO*alpha_AN(8,2,0,0,0,temp,cair); {&2419}
<G48234>  C8BCO2              = C89O2                            : {%TrGTer} k1_RO2sRO2; {&2419}
<G48235>  C8BCOOH + OH        = C8BCCO + OH                      : {%TrGTer} 1.62E-11{§}; {&2419}
<G48236>  C8BCNO3 + OH        = C8BCCO + NO2                     : {%TrGTer} 1.84E-12{§}; {&2419}
<G48237>  C8BCCO + OH         = C89O2                            : {%TrGTer} 3.94E-12{§}; {&2419}
<G48238>  C89O2 + HO2         = C89OOH                           : {%TrGTer} k_RO2_HO2(temp,8); {&2419}
<G48239a> C89O2 + NO          = C810O2 + NO2                     : {%TrGTer} KRO2NO*(1.-alpha_AN(7,2,0,0,0,temp,cair)); {&2419}
<G48239b> C89O2 + NO          = C89NO3                           : {%TrGTer} KRO2NO*alpha_AN(7,2,0,0,0,temp,cair); {&2419}
<G48240>  C89O2 + NO3         = C810O2 + NO2                     : {%TrGTer} KRO2NO3; {&2419}
<G48241>  C89O2               = C810O2                           : {%TrGTer} k1_RO2tRO2; {&2419}
<G48242>  C89OOH + OH         = C89O2                            : {%TrGTer} 3.61E-11{§}; {&2419}
<G48243>  C89NO3 + OH         = CH3COCH3 + CO13C4CHO + NO2       : {%TrGTer} 2.56E-11{§}; {&2419}
<G48244>  C810O2 + HO2        = C810OOH                          : {%TrGTer} k_RO2_HO2(temp,8); {&2419}
<G48245a> C810O2 + NO         = CH3COCH3 + C514O2 + NO2          : {%TrGTer} KRO2NO*(1.-alpha_AN(10,3,0,0,0,temp,cair)); {&2419}
<G48245b> C810O2 + NO         = C810NO3                          : {%TrGTer} KRO2NO*alpha_AN(10,3,0,0,0,temp,cair); {&2419}
<G48246>  C810O2 + NO3        = CH3COCH3 + C514O2 + NO2          : {%TrGTer} KRO2NO3; {&2419}
<G48247>  C810O2              = CH3COCH3 + C514O2                : {%TrGTer} k1_RO2tRO2; {&2419}
<G48248>  C810OOH + OH        = C810O2                           : {%TrGTer} 8.35E-11{§}; {&2419}
<G48249>  C810NO3 + OH        = CH3COCH3 + CO13C4CHO + NO2       : {%TrGTer} 4.96E-11{§}; {&2419}
// aromatics-related (G48400...G48599):
<G48400a> LXYL        + OH    = TLEPOXMUC + HO2  + LCARBON       : {%TrGAro} 0.401E-11; {&2419} // Same products as for toluene. Assuming a 1:1:1 proportion in xylenes emissions the analogous toluene product is produced with a rate constant equal to (1.36E-11*0.24 + 2.31E-11*0.29 + 1.43E-11*0.155)/3, where k and coefficients are for the single isomers ortho, meta and para from MCM.
<G48400b> LXYL        + OH    = C6H5CH2O2        + LCARBON       : {%TrGAro} 0.101E-11; {&2419} // Same products as for toluene. Assuming a 1:1:1 proportion in xylenes emissions the analogous toluene product is produced with a rate constant equal to (1.36E-11*0.05 + 2.31E-11*0.04 + 1.43E-11*0.10)/3, where k and coefficients are for the single isomers ortho, meta and para from MCM.
<G48400c> LXYL        + OH    = CRESOL           + LCARBON       : {%TrGAro} 0.261E-11; {&2419} // Same products as for toluene. Assuming a 1:1:1 proportion in xylenes emissions the analogous toluene product is produced with a rate constant equal to (1.36E-11*0.16 + 2.31E-11*0.17 + 1.43E-11*0.12)/3, where k and coefficients are for the single isomers ortho, meta and para from MCM.
<G48400d> LXYL        + OH    = TLBIPERO2 +  HO2 + LCARBON       : {%TrGAro} 0.932E-11; {&2419} // Same products as for toluene. Assuming a 1:1:1 proportion in xylenes emissions the analogous toluene product is produced with a rate constant equal to (1.36E-11*0.55 + 2.31E-11*0.50 + 1.43E-11*0.625)/3, where k and coefficients are for the single isomers ortho, meta and para from MCM.
<G48401>  LXYL        + NO3   = C6H5CH2O2 + HNO3 + LCARBON       : {%TrGAro} 3.9E-16; {&2419} // Same products as for toluene. The rate constant is the average of m, p, o k=(4.10E-16+2.60E-16+5.00E-16)/3 = 3.9E-16.
<G48402>  EBENZ       + OH    = .10 TLEPOXMUC + .07 C6H5CH2O2 + .18 CRESOL + .65 TLBIPERO2 + .28 HO2 + LCARBON : {%TrGAro} 7.00E-12; {&2419} // merged under same rate constant
<G48403>  EBENZ       + NO3   = C6H5CH2O2 + HNO3 + LCARBON       : {%TrGAro} 1.20E-16; {&2419} // Same products as for toluene
<G48404>  STYRENE     + NO3   = NSTYRENO2                        : {%TrGAro} 1.50E-12; {&2419}
<G48405>  STYRENE     + O3    = .545 HCHO + .1 BENZENE + .28 C6H5O2 + .56 CO + .36 OH + .28 HO2 + .075 PHCOOH + .545 BENZAL +  .09 H2O2 + .075 HCOOH + .2 CO2 : {%TrGAro} 1.70E-17; {&2419} // KDEC CH2OOB $\rightarrow$ 0.24 CH2OO + 0.40 CO + 0.36 HO2 + 0.36 CO + 0.36 OH and H2O + PHCHOO $\rightarrow$ 0.625 PHCOOH + 0.375 BENZAL + 0.375 H2O2 + 0.2 CO2
<G48406>  STYRENE     + OH    = STYRENO2                         : {%TrGAro} 5.80E-11; {&2419}
<G48407>  NSTYRENO2   + HO2   = NSTYRENOOH                       : {%TrGAro} k_RO2_HO2(temp,8); {&2419}
<G48408>  NSTYRENO2   + NO    = NO2 + NO2 + HCHO + BENZAL        : {%TrGAro} KRO2NO; {&2419} // KDEC NSTYRENEO $\rightarrow$ NO2 + HCHO + BENZAL
<G48409>  NSTYRENO2   + NO3   = NO2 + NO2 + HCHO + BENZAL        : {%TrGAro} KRO2NO3; {&2419} // KDEC NSTYRENEO $\rightarrow$ NO2 + HCHO + BENZAL
<G48410>  NSTYRENO2           = NO2 + HCHO + BENZAL              : {%TrGAro} k1_RO2sRO2; {&2419} // KDEC NSTYRENEO $\rightarrow$ NO2 + HCHO + BENZAL
<G48411>  NSTYRENOOH  + OH    = NSTYRENO2                        : {%TrGAro} 6.16E-11; {&2419}
<G48412a> STYRENO2    + HO2   = STYRENOOH                        : {%TrGAro} k_RO2_HO2(temp,8)*(1.-r_CHOHCH2O2_OH); {&2419}
<G48412b> STYRENO2    + HO2   = HO2 + OH + HCHO + BENZAL         : {%TrGAro} k_RO2_HO2(temp,8)*r_CHOHCH2O2_OH; {&2419} // KDEC STYRENO $\rightarrow$ HO2 + HCHO + BENZAL and reactions with KRO2HO2.
<G48413>  STYRENO2    + NO    = NO2 + HO2 + HCHO + BENZAL        : {%TrGAro} KRO2NO; {&2419} // KDEC STYRENO $\rightarrow$ HO2 + HCHO + BENZAL
<G48414>  STYRENO2    + NO3   = NO2 + HO2 + HCHO + BENZAL        : {%TrGAro} KRO2NO3; {&2419} // KDEC STYRENO $\rightarrow$ HO2 + HCHO + BENZAL
<G48415>  STYRENO2            = HO2 + HCHO + BENZAL              : {%TrGAro} k1_RO2sRO2; {&2419} // KDEC STYRENO $\rightarrow$ HO2 + HCHO + BENZAL
<G48416>  STYRENOOH   + OH    = STYRENO2                         : {%TrGAro} 6.16E-11; {&2419}

// 9C (#G49nnn)
// terpene-related (G49200...G49399):
<G49200>  C96O2               = C97O2                            : {%TrGTer} k1_RO2pRO2; {&2419}
<G49201>  C96O2 + HO2         = C96OOH                           : {%TrGTer} k_RO2_HO2(temp,9); {&2419}
<G49202a> C96O2 + NO          = C97O2 + NO2                      : {%TrGTer} KRO2NO*(1.-alpha_AN(10,1,0,0,0,temp,cair)); {&2419}
<G49202b> C96O2 + NO          = C96NO3                           : {%TrGTer} KRO2NO*alpha_AN(10,1,0,0,0,temp,cair); {&2419}
<G49203>  C96NO3 + OH         = NORPINAL + NO2                   : {%TrGTer} 2.88E-12{§}; {&2419}
<G49204a> C96OOH + OH         = C96O2                            : {%TrGTer} k_ROOHRO; {&2419}
<G49205b> C96OOH + OH         = NORPINAL + OH                    : {%TrGTer} 1.30E-11{§}; {&2419}
<G49206>  C97O2               = C98O2                            : {%TrGTer} k1_RO2tRO2; {&2419}
<G49207>  C97O2 + NO          = C98O2 + NO2                      : {%TrGTer} KRO2NO; {&2419} // \alkylnitrateneglected
<G49208a> C97O2 + HO2         = C97OOH                           : {%TrGTer} k_RO2_HO2(temp,9)*r_COCH2O2_OOH; {&2419, 3264}
<G49208b> C97O2 + HO2         = C98O2 + OH                       : {%TrGTer} k_RO2_HO2(temp,9)*r_COCH2O2_OH; {&2419, 3264}
<G49209>  C97OOH + OH         = C97O2                            : {%TrGTer} 1.05E-11{§}; {&2419}
<G49210>  C98O2               = C614O2 + CH3COCH3                : {%TrGTer} k1_RO2tRO2; {&2419}
<G49211a> C98O2 + NO          = C614O2 + CH3COCH3 + NO2          : {%TrGTer} KRO2NO*(1.-alpha_AN(12,3,0,0,0,temp,cair)); {&2419}
<G49211b> C98O2 + NO          = 9 LCARBON + LNITROGEN            : {%TrGTer} KRO2NO*alpha_AN(12,3,0,0,0,temp,cair); {&2419}
<G49212>  C98O2 + HO2         = C98OOH                           : {%TrGTer} k_RO2_HO2(temp,9); {&2419}
<G49213>  C98OOH + OH         = C98O2                            : {%TrGTer} 2.05E-11{§}; {&2419}
<G49214>  NORPINAL + OH       = C85CO3                           : {%TrGTer} 2.64E-11{§}; {&2419}
<G49215>  NORPINAL + NO3      = C85CO3 + HNO3                    : {%TrGTer} KNO3AL*8.5; {&2419}
<G49216>  C85CO3              = C85O2 + CO2                      : {%TrGTer} k1_RO2RCO3; {&2419}
<G49217>  C85CO3 + NO         = C85O2 + CO2 + NO2                : {%TrGTer} KAPNO; {&2419}
<G49218>  C85CO3 + NO2        = C9PAN2                           : {%TrGTer} k_CH3CO3_NO2; {&2419}
<G49219a> C85CO3 + HO2        = C85CO3H                          : {%TrGTer} KAPHO2*(r_CO3_OOH+r_CO3_O3); {&2419}
<G49219b> C85CO3 + HO2        = C85O2 + CO2 + OH                 : {%TrGTer} KAPHO2*r_CO3_OH; {&2419}
<G49220>  C9PAN2              = C85CO3 + NO2                     : {%TrGTer} k_PAN_M; {&2419}
<G49221>  C9PAN2 + OH         = C85OOH + CO + NO2                : {%TrGTer} 6.60E-12{§}; {&2419}
<G49222>  C85CO3H + OH        = C85CO3                           : {%TrGTer} 1.02E-11{§}; {&2419}
<G49223a> C89CO3              = .8 C811CO3 + .2 C89O2 + .2 CO2   : {%TrGTer} k1_RO2RCO3*0.9; {&3264}
<G49223b> C89CO3              = C89CO2H                          : {%TrGTer} k1_RO2RCO3*0.1; {&3264}
<G49224a> C89CO3 + HO2        = C89CO3H                          : {%TrGTer} KAPHO2*r_CO3_OOH; {&2419}
<G49224b> C89CO3 + HO2        = C89CO2H + O3                     : {%TrGTer} KAPHO2*r_CO3_O3; {&2419}
<G49224c> C89CO3 + HO2        = .80 C811CO3 + .20 C89O2 + .2 CO2 + OH : {%TrGTer} KAPHO2*r_CO3_OH; {&2419}
<G49225>  C89CO3 + NO2        = C89PAN                           : {%TrGTer} k_CH3CO3_NO2; {&2419}
<G49226>  C89CO3 + NO         = .8 C811CO3 + .2 C89O2 + .2 CO2 + NO2 : {%TrGTer} KAPNO; {&2419}
<G49227>  C89CO2H + OH        = .8 C811CO3 + .2 C89O2 + .2 CO2   : {%TrGTer} 2.69E-11{§}; {&2419}
<G49228>  C89CO3H + OH        = C89CO3                           : {%TrGTer} 3.00E-11{§}; {&2419}
<G49229>  C89PAN              = C89CO3 + NO2                     : {%TrGTer} k_PAN_M; {&2419}
<G49230>  C89PAN + OH         = CH3COCH3 + CO13C4CHO + CO + NO2  : {%TrGTer} 2.52E-11{§}; {&2419}
<G49231a> C811CO3             = C811O2 + CO2                     : {%TrGTer} k1_RO2RCO3*0.9; {&3264}
<G49231b> C811CO3             = PINIC                            : {%TrGTer} k1_RO2RCO3*0.1; {&3264}
<G49232a> C811CO3 + HO2       = C811CO3H                         : {%TrGTer} KAPHO2*r_CO3_OOH; {&2419}
<G49232b> C811CO3 + HO2       = PINIC + O3                       : {%TrGTer} KAPHO2*r_CO3_O3; {&2419}
<G49232c> C811CO3 + HO2       = C811O2 + CO2 + OH                : {%TrGTer} KAPHO2*r_CO3_OH; {&2419}
<G49233>  C811CO3 + NO        = C811O2 + CO2 + NO2               : {%TrGTer} KAPNO; {&2419}
<G49234>  C811CO3 + NO2       = C811PAN                          : {%TrGTer} k_CH3CO3_NO2; {&2419}
<G49235>  PINIC + OH          = C811O2 + CO2                     : {%TrGTer} 7.29E-12{§}; {&2419}
<G49236>  NOPINONE + OH       = NOPINDO2                         : {%TrGTer} 1.55E-11{§}; {&3028, 2419}
<G49237a> NOPINDO2 + HO2      = NOPINDOOH                        : {%TrGTer} k_RO2_HO2(temp,9)*r_COCH2O2_OOH; {&2419, 3264}
<G49237b> NOPINDO2 + HO2      = C89CO3 + OH                      : {%TrGTer} k_RO2_HO2(temp,9)*r_COCH2O2_OH; {&2419, 3264}
<G49238>  NOPINDO2 + NO       = C89CO3 + NO2                     : {%TrGTer} KRO2NO; {&2419} // \alkylnitrateneglected
<G49239>  NOPINDO2            = C89CO3                           : {%TrGTer} k1_RO2pORO2; {&2419}
<G49240>  NOPINDOOH {+ OH}    = NOPINDCO {+ OH}                  : {%TrGTer} 2.63E-11{§}; {&2419}
<G49241>  NOPINDCO + OH       = C89CO3                           : {%TrGTer} 3.07E-12{§}; {&2419}
<G49242>  NOPINOO             = NOPINONE + H2O2                  : {%TrGTer} 6.00E-18{§}*c(ind_H2O); {&2419}
<G49243>  NOPINOO + CO        = NOPINONE + CO2                   : {%TrGTer} 1.2E-15{§}; {&2419}
<G49244>  NOPINOO + NO        = NOPINONE + NO2                   : {%TrGTer} 1.E-14{§}; {&2419}
<G49245>  NOPINOO + NO2       = NOPINONE + NO3                   : {%TrGTer} 1.E-15{§}; {&2419}
<G49246>  NORPINENOL + OH     = HCOOH + OH + C86O2               : {%TrGTer} k_CH2CHOH_OH_HCOOH; {&3264, 3179} // \onlythischannel Instead of the (lacking) carbonyl a product of further degradation is assumed.
<G49247>  NORPINENOL + HCOOH  = NORPINAL + HCOOH                 : {%TrGTer} k_CH2CHOH_HCOOH; {&3264, 3162} // Theoretical keto-enol tautomerization catalyzed by formic acid \citep{2040}.
<G49248>  NORPINAL  + HCOOH   = NORPINENOL + HCOOH               : {%TrGTer} k_ALD_HCOOH; {&3264, 3162} // Theoretical keto-enol tautomerization catalyzed by formic acid \citep{2040}.
<G49249>  C811CO3H + OH       = C811CO3                          : {%TrGTer} 1.04E-11{§}; {&2419}
<G49250>  C811PAN             = C811CO3 + NO2                    : {%TrGTer} k_PAN_M; {&2419}
<G49251>  C811PAN + OH        = C721CHO + CO + NO2               : {%TrGTer} 6.77E-12{§}; {&2419}
// aromatics-related (G49400...G49599):
<G49400a> LTMB       + OH     = TLEPOXMUC + HO2  + 2 LCARBON     : {%TrGAro} 0.827E-11; {&2419} // Same products as for toluene. Assuming a 1:1:1 proportion in xylenes emissions the analogous toluene product is produced with a rate constant equal to (3.27E-11*0.21 + 3.25E-11*0.30 + 5.67E-11*0.14)/3, where k and coefficients are for the single isomers 1,2,3-, 1,3,4- and 1,3,5- from MCM.
<G49400b> LTMB       + OH     = C6H5CH2O2        + 2 LCARBON     : {%TrGAro} 0.189E-11; {&2419} // Same products as for toluene. Assuming a 1:1:1 proportion in xylenes emissions the analogous toluene product is produced with a rate constant equal to (3.27E-11*0.06 + 3.25E-11*0.06 + 5.67E-11*0.03)/3, where k and coefficients are for the single isomers 1,2,3-, 1,3,4- and 1,3,5- from MCM.
<G49400c> LTMB       + OH     = CRESOL           + 2 LCARBON     : {%TrGAro} 0.141E-11; {&2419} // Same products as for toluene. Assuming a 1:1:1 proportion in xylenes emissions the analogous toluene product is produced with a rate constant equal to (3.27E-11*0.03 + 3.25E-11*0.03 + 5.67E-11*.04)/3, where k and coefficients are for the single isomers 1,2,3-, 1,3,4- and 1,3,5- from MCM.
<G49400d> LTMB       + OH     = TLBIPERO2 +  HO2 + 2 LCARBON     : {%TrGAro} 2.917E-11; {&2419} // Same products as for toluene. Assuming a 1:1:1 proportion in xylenes emissions the analogous toluene product is produced with a rate constant equal to (3.27E-11*0.70 + 3.25E-11*0.61 + 5.67E-11*0.79)/3, where k and coefficients are for the single isomers 1,2,3-, 1,3,4- and 1,3,5- from MCM.
<G49401>  LTMB       + NO3    = C6H5CH2O2 + HNO3 + 2 LCARBON     : {%TrGAro} 1.52E-15;  {&2419} // Same products as for toluene. The rate constant is the average of m, p, o k=(1.90+1.80+0.88)E-15/3=1.52E-15.

// >=10C (#G40nnn)
// terpene-related (G40200...G40399):
<G40200>  APINENE + OH          = .75 LAPINABO2 + .15 MENTHEN6ONE + .15 HO2 + .10 ROO6R1O2 : {%TrGTer} 1.2E-11{§§0.15}*EXP(440./temp); {&1759} // Products from \citet{3017}. LAPINABO2 = 0.65 APINAO2 + 0.35 APINBO2
<G40201a> LAPINABO2 + NO        = PINAL + HO2 + NO2                : {%TrGTer} KRO2NO*(1.-(.65*alpha_AN(11,3,0,0,0,temp,cair)+.35*alpha_AN(11,2,0,0,0,temp,cair))); {&2419, 3264}
<G40201b> LAPINABO2 + NO        = LAPINABNO3                       : {%TrGTer} KRO2NO*(.65*alpha_AN(11,3,0,0,0,temp,cair)+.35*alpha_AN(11,2,0,0,0,temp,cair)); {&2419, 3264}
<G40202a> LAPINABO2 + HO2       = LAPINABOOH                       : {%TrGTer} k_RO2_HO2(temp,10)*(1.-r_CHOHCH2O2_OH); {&2419, 3264}
<G40202b> LAPINABO2 + HO2       = PINAL + HO2 + OH                 : {%TrGTer} k_RO2_HO2(temp,10)*r_CHOHCH2O2_OH; {&2419, 3264}
<G40203>  LAPINABO2             = PINAL + HO2                      : {%TrGTer} RO2*(0.65*k1_RO2tORO2+.35*k1_RO2sORO2){§}; {&2419} // Weighted average for isomers A and B, \code{k = 0.33*9.20E-14+0.67*8.80E-13}.
<G40204>  LAPINABOOH + OH       = .35 LAPINABO2 + .65 C96CO3       : {%TrGTer} 2.77E-11{§}; {&2419} // Weighted average for isomers A and B, \code{k = 0.35*1.83E-11+0.65*3.28E-11}.
<G40205>  LAPINABNO3 + OH       = .35 PINAL + .65 C96CO3 + NO2     : {%TrGTer} 4.29E-12{§}; {&2419} // Weighted average for isomers A and B, \code{k = 0.35*5.50E-12+0.65*3.64E-12}.
<G40206>  MENTHEN6ONE + OH      = OHMENTHEN6ONEO2                  : {%TrGTer} 6.46E-11{§}; {&3017} // SAR-estimated rate constant, \code{(kads+kadt)*acoch3 = 6.46E-11} where \code{kads = 3.0E-11}, \code{kadt = 5.5E-11}, \code{acoch3 = 0.76}
<G40207>  OHMENTHEN6ONEO2 + NO  = OH2MENTHEN6ONE + HO2 + NO2       : {%TrGTer} KRO2NO; {&3017} // \alkylnitrateneglected
<G40208>  OHMENTHEN6ONEO2 + HO2 = OH2MENTHEN6ONE                   : {%TrGTer} k_RO2_HO2(temp,10); {&3017}
<G40209>  OHMENTHEN6ONEO2       = OH2MENTHEN6ONE + HO2             : {%TrGTer} k1_RO2tORO2{§}; {&3017}
<G40210>  OH2MENTHEN6ONE + OH   = 10 LCARBON                       : {%TrGTer} 1E-11{§}; {&3017}
<G40211>  PINAL + OH            = .772 C96CO3 +  .228 PINALO2      : {%TrGTer} 5.2E-12{§§0.15}*EXP(600./temp); {&1745} // Products from \citet{2419}.
<G40212>  PINAL + NO3           = C96CO3 + HNO3                    : {%TrGTer} 2.0E-14{§§0.25}; {&1745} // Products from \citet{2419}.
<G40213a> C96CO3                = C96O2 + CO2                      : {%TrGTer} k1_RO2RCO3*0.9; {&2419}
<G40213b> C96CO3                = PINONIC                          : {%TrGTer} k1_RO2RCO3*0.1; {&2419}
<G40214a> C96CO3 + HO2          = PERPINONIC                       : {%TrGTer} KAPHO2*r_CO3_OOH; {&2419}
<G40214b> C96CO3 + HO2          = PINONIC + O3                     : {%TrGTer} KAPHO2*r_CO3_O3; {&2419}
<G40214c> C96CO3 + HO2          = C96O2 + OH + CO2                 : {%TrGTer} KAPHO2*r_CO3_OH; {&2419}
<G40215>  C96CO3 + NO2          = C10PAN2                          : {%TrGTer} k_CH3CO3_NO2; {&2419}
<G40216>  C96CO3 + NO           = C96O2 + NO2 + CO2                : {%TrGTer} KAPNO; {&2419}
<G40217>  C96CO3 + NO3          = C96O2 + NO2 + CO2                : {%TrGTer} KRO2NO3*1.74; {&2419}
<G40218>  C10PAN2               = C96CO3 + NO2                     : {%TrGTer} k_PAN_M; {&2419}
<G40219>  C10PAN2 + OH          = NORPINAL + CO + NO2              : {%TrGTer} 3.66E-12{§}; {&2419}
<G40220>  PINONIC + OH          = C96O2 + CO2                      : {%TrGTer} 6.65E-12{§}; {&2419}
<G40221>  PERPINONIC + OH       = C96CO3                           : {%TrGTer} 9.73E-12{§}; {&2419}
<G40222>  PINALO2 + HO2         = PINALOOH                         : {%TrGTer} k_RO2_HO2(temp,10); {&2419}
<G40223a> PINALO2 + NO          = C106O2 + NO2                     : {%TrGTer} KRO2NO*(1.-alpha_AN(12,3,0,1,0,temp,cair)); {&2419, 3264}
<G40223b> PINALO2 + NO          = PINALNO3                         : {%TrGTer} KRO2NO*alpha_AN(12,3,0,1,0,temp,cair); {&2419, 3264}
<G40224>  PINALO2               = C106O2                           : {%TrGTer} k1_RO2tRO2; {&2419}
<G40225>  PINALOOH + OH         = PINALO2                          : {%TrGTer} 2.75E-11{§}; {&2419}
<G40226>  PINALNO3 + OH         = CO235C6CHO + CH3COCH3 + NO2      : {%TrGTer} 2.25E-11{§}; {&2419}
<G40227>  C106O2 + HO2          = C106OOH                          : {%TrGTer} k_RO2_HO2(temp,10); {&2419}
<G40228a> C106O2 + NO           = C716O2 + CH3COCH3 + NO2          : {%TrGTer} KRO2NO*0.875*(1.-alpha_AN(13,3,0,0,0,temp,cair)); {&2419, 3264}
<G40228b> C106O2 + NO           = C106NO3                          : {%TrGTer} KRO2NO*0.875*alpha_AN(13,3,0,0,0,temp,cair); {&2419, 3264}
<G40229>  C106O2                = C716O2 + CH3COCH3                : {%TrGTer} k1_RO2tRO2; {&2419}
<G40230>  C106OOH + OH          = C106O2                           : {%TrGTer} 8.01E-11{§}; {&2419}
<G40231>  C106NO3 + OH          = CO235C6CHO + CH3COCH3 + NO2      : {%TrGTer} 7.03E-11{§}; {&2419}
<G40232>  APINENE + O3          = .09 APINBOO + .08 PINONIC + .77 OH + .33 NORPINAL + .33 CO + .33 HO2 + .06 APINAOO + .44 C109O2 : {%TrGTer} 8.05E-16{§§0.15}*EXP(-640./temp); {&1745} // Products from \citet{3028}.
<G40233>  APINAOO               = PINAL + H2O2                     : {%TrGTer} 1.00E-17{§}*c(ind_H2O); {&2419}
<G40234>  APINAOO + CO          = PINAL + CO2                      : {%TrGTer} 1.20E-15{§}; {&2419}
<G40235>  APINAOO + NO          = PINAL + NO2                      : {%TrGTer} 1.00E-14{§}; {&2419}
<G40236>  APINAOO + NO2         = PINAL + NO3                      : {%TrGTer} 1.00E-15{§}; {&2419}
<G40237a> APINBOO               = PINONIC                          : {%TrGTer} 1.00E-17{§}*c(ind_H2O)*(0.08+0.15); {&2419}
<G40237b> APINBOO               = PINAL + H2O2                     : {%TrGTer} 1.00E-17{§}*c(ind_H2O)*0.77; {&2419}
<G40238>  APINBOO + CO          = PINAL + CO2                      : {%TrGTer} 1.20E-15{§}; {&2419}
<G40239>  APINBOO + NO          = PINAL + NO2                      : {%TrGTer} 1.00E-14{§}; {&2419}
<G40240>  APINBOO + NO2         = PINAL + NO3                      : {%TrGTer} 1.00E-15{§}; {&2419}
<G40241>  C109O2                = C89CO3 + HCHO                    : {%TrGTer} k1_RO2pORO2; {&2419}
<G40242>  C109O2 + NO           = C89CO3 + HCHO + NO2              : {%TrGTer} KRO2NO; {&2419} // \alkylnitrateneglected
<G40243a> C109O2 + HO2          = C109OOH                          : {%TrGTer} k_RO2_HO2(temp,10)*r_COCH2O2_OOH; {&2419, 3264}
<G40243b> C109O2 + HO2          = C89CO3 + HCHO + OH               : {%TrGTer} k_RO2_HO2(temp,10)*r_COCH2O2_OH; {&2419, 3264}
<G40244>  C109OOH + OH          = C109CO + OH                      : {%TrGTer} 5.47E-11{§}; {&2419}
<G40245>  C109CO + OH           = C89CO3 + CO                      : {%TrGTer} 5.47E-11{§}; {&2419}
<G40246>  APINENE + NO3         = LNAPINABO2                       : {%TrGTer} 1.2E-12{§}*EXP(490./temp); {&1745} // Products from \citet{2419}.
<G40247>  LNAPINABO2            = PINAL + NO2                      : {%TrGTer} (0.65*k1_RO2tRO2 + 0.35*k1_RO2sRO2); {&2419}
<G40248>  LNAPINABO2 + NO       = PINAL + NO2 + NO2                : {%TrGTer} KRO2NO; {&2419} // \alkylnitrateneglected
<G40249>  LNAPINABO2 + HO2      = LNAPINABOOH                      : {%TrGTer} k_RO2_HO2(temp,10); {&2419}
<G40250>  LNAPINABO2 + NO3      = PINAL + NO2 + NO2                : {%TrGTer} KRO2NO3; {&2419}
<G40251>  LNAPINABOOH + OH      = LNAPINABO2                       : {%TrGTer} (.65*6.87E-12+.35*1.23E-11){§}; {&2419}
<G40252a> BPINENE + OH          = BPINAO2                          : {%TrGTer} 1.47E-11{§}*EXP(467./temp)*(0.8326*0.3+0.068)/(0.8326+0.068); {&3029} // Products from \citet{3019}.
<G40252b> BPINENE + OH          = ROO6R1O2                         : {%TrGTer} 1.47E-11{§}*EXP(467./temp)*0.8326*0.7/(0.8326+0.068); {&3029} // Products from \citet{3019}.
<G40253a> BPINAO2 + HO2         = BPINAOOH                         : {%TrGTer} k_RO2_HO2(temp,10)*r_COCH2O2_OOH; {&2419, 3264}
<G40253b> BPINAO2 + HO2         = NOPINONE + HCHO + HO2 + OH       : {%TrGTer} k_RO2_HO2(temp,10)*r_COCH2O2_OH; {&2419, 3264}
<G40254a> BPINAO2 + NO          = NOPINONE + HCHO + HO2 + NO2      : {%TrGTer} KRO2NO*(1.-alpha_AN(11,3,0,0,0,temp,cair)); {&2419, 3264}
<G40254b> BPINAO2 + NO          = BPINANO3                         : {%TrGTer} KRO2NO*alpha_AN(11,3,0,0,0,temp,cair); {&2419, 3264}
<G40255>  BPINAO2               = NOPINONE + HCHO + HO2            : {%TrGTer} k1_RO2tORO2; {&2419}
<G40256>  BPINAOOH + OH         = BPINAO2                          : {%TrGTer} 1.33E-11{§}; {&2419}
<G40257>  BPINANO3 + OH         = NOPINONE + HCHO + NO2            : {%TrGTer} 4.70E-12{§}; {&2419}
<G40258a> ROO6R1O2 + NO         = ROO6R3O2 + CH3COCH3 + NO2        : {%TrGTer} KRO2NO*(1.-alpha_AN(13,3,0,0,0,temp,cair)); {&3019}
<G40258b> ROO6R1O2 + NO         = ROO6R1NO3                        : {%TrGTer} KRO2NO*alpha_AN(13,3,0,0,0,temp,cair); {&3019}
<G40259>  ROO6R1O2 + HO2        = 10 LCARBON                       : {%TrGTer} k_RO2_HO2(temp,10); {&3019} // ROO6R1OOH is produced but no sink for it.
<G40260>  ROO6R1O2              = ROO6R3O2 + CH3COCH3              : {%TrGTer} k1_RO2tORO2; {&3019}
<G40261a> RO6R1O2 + NO          = RO6R3O2 + NO2                    : {%TrGTer} KRO2NO*(1.-alpha_AN(12,3,0,0,0,temp,cair)); {&3019}
<G40261b> RO6R1O2 + NO          = RO6R1NO3                         : {%TrGTer} KRO2NO*alpha_AN(12,3,0,0,0,temp,cair); {&3019}
<G40262>  RO6R1O2 + HO2         = 10 LCARBON                       : {%TrGTer} k_RO2_HO2(temp,10); {&3019} // RO6R1OOH is produced but no sink for it.
<G40263>  RO6R1O2               = RO6R3O2                          : {%TrGTer} k1_RO2sORO2; {&3019}
<G40264a> RO6R3O2 + NO          = 9 LCARBON + HCHO + HO2 + NO2     : {%TrGTer} KRO2NO*(1.-alpha_AN(12,3,0,0,0,temp,cair)); {&3019}
<G40264b> RO6R3O2 + NO          = 10 LCARBON + LNITROGEN           : {%TrGTer} KRO2NO*alpha_AN(12,3,0,0,0,temp,cair); {&3019}
<G40265>  RO6R3O2 + HO2         = 10 LCARBON                       : {%TrGTer} k_RO2_HO2(temp,10); {&3019}
<G40266>  RO6R3O2               = 9 LCARBON + HCHO + HO2           : {%TrGTer} k1_RO2sRO2; {&3019} // Rate constant modified according to MCM protocol.
<G40267a> BPINENE + O3          = NOPINONE + .63 CO + .37 CH2OO + .16 OH + .16 HO2 : {%TrGTer} 1.35E-15{§§0.25}*EXP(-1270./temp)*.051/(1.-.027); {&1745} // Products from \citet{3018}.
<G40267b> BPINENE + O3          = NOPINOO + CO2                    : {%TrGTer} 1.35E-15{§§0.25}*EXP(-1270./temp)*.368/(1.-.027); {&3018, 1745}
<G40267c> BPINENE + O3          = NOPINDO2 + CO2 + OH              : {%TrGTer} 1.35E-15{§§0.25}*EXP(-1270./temp)*.283/(1.-.027); {&3018, 1745}
<G40267d> BPINENE + O3          = C8BC + 2 CO2                     : {%TrGTer} 1.35E-15{§§0.25}*EXP(-1270./temp)*(.104+.167)/(1.-.027); {&3018, 1745}
<G40268>  BPINENE + NO3         = LNBPINABO2                       : {%TrGTer} 2.51E-12{§}; {&1745} // Products from \citet{2419}.
<G40269>  LNBPINABO2 + HO2      = LNBPINABOOH                      : {%TrGTer} k_RO2_HO2(temp,10); {&2419}
<G40270>  LNBPINABO2 + NO       = NOPINONE + HCHO + NO2 + NO2      : {%TrGTer} KRO2NO; {&2419} // Alkyl nitrate neglected.
<G40271>  LNBPINABO2 + NO3      = NOPINONE + HCHO + NO2 + NO2      : {%TrGTer} KRO2NO3; {&2419}
<G40272a> LNBPINABO2            = NOPINONE + HCHO + NO2            : {%TrGTer} k1_RO2tRO2*0.7; {&2419}
<G40272b> LNBPINABO2            = BPINANO3                         : {%TrGTer} k1_RO2tRO2*0.3; {&2419}
<G40273>  LNBPINABOOH + OH      = LNBPINABO2                       : {%TrGTer} 9.58E-12{§}; {&2419}
<G40274>  ROO6R1NO3 + OH        = ROO6R3O2 + CH3COCH3 + NO2        : {%TrGTer} 9.16E-13{§}; {&3019, 3029} // As for RO6R1NO3 in G4085.
<G40275>  RO6R1NO3 + OH         = 9 LCARBON + HCHO + HO2 + NO2     : {%TrGTer} 9.16E-13{§}; {&3019, 3029}
<G40276>  PINENOL + OH          = HCOOH + OH + NORPINAL            : {%TrGTer} k_CH2CHOH_OH_HCOOH; {&3264, 3179} // \onlythischannel
<G40277>  PINENOL + HCOOH       = PINAL + HCOOH                    : {%TrGTer} k_CH2CHOH_HCOOH; {&3264, 3162} // Theoretical keto-enol tautomerization catalyzed by formic acid \citep{2040}.
<G40278>  PINAL  + HCOOH        = PINENOL + HCOOH                  : {%TrGTer} k_ALD_HCOOH; {&3264, 3162} // Theoretical keto-enol tautomerization catalyzed by formic acid \citep{2040}.
// 3-carene (APINENE-like -> assumption: products as for APINENE)
<G40279a> CARENE    + OH  = LAPINABO2                        : {%TrG} 8.8E-11*(.50+.25); {&3386}
<G40279b> CARENE    + OH  = MENTHEN6ONE + HO2                : {%TrG} 8.8E-11*.25*.60; {&3386}
<G40279c> CARENE    + OH  = ROO6R1O2                         : {%TrG} 8.8E-11*.25*.40; {&3386}
<G40280a> CARENE    + O3  = APINBOO                          : {%TrG} 3.7E-17*.50*.18; {&3386}
<G40280b> CARENE    + O3  = PINONIC                          : {%TrG} 3.7E-17*.50*.16; {&3386}
<G40280c> CARENE    + O3  = OH + NORPINAL + CO + HO2         : {%TrG} 3.7E-17*.50*.66; {&3386}
<G40280d> CARENE    + O3  = APINAOO                          : {%TrG} 3.7E-17*.50*.12; {&3386}
<G40280e> CARENE    + O3  = OH + C109O2                      : {%TrG} 3.7E-17*.50*(.22+.66); {&3386}
<G40281>  CARENE    + NO3 = LNAPINABO2                       : {%TrG} 9.1E-12; {&3386}
// SABINENE assumed to react like BPINENE
<G40282a> SABINENE  + OH  = BPINAO2                          : {%TrGTer} 1.47E-11{§}*EXP(467./temp)*(0.8326*0.3+0.068)/(0.8326+0.068); {&3029} // Products from \citet{3019}.
<G40282b> SABINENE  + OH  = ROO6R1O2                         : {%TrGTer} 1.47E-11{§}*EXP(467./temp)*0.8326*0.7/(0.8326+0.068); {&3019, 3029} // Products from \citet{3019}.
<G40283a> SABINENE  + O3  = NOPINONE + .63 CO + .37 HOCH2OOH + .16 OH + .16 HO2 : {%TrGTer} 1.35E-15{§§0.25}*EXP(-1270./temp)*.051/(1.-.027); {&1745} // Products from \citet{3018}.
<G40283b> SABINENE  + O3  = NOPINOO + CO2                    : {%TrGTer} 1.35E-15{§§0.25}*EXP(-1270./temp)*.368/(1.-.027); {&3018, 1745}
<G40283c> SABINENE  + O3  = NOPINDO2 + CO2 + OH              : {%TrGTer} 1.35E-15{§§0.25}*EXP(-1270./temp)*.283/(1.-.027); {&3018, 1745}
<G40283d> SABINENE  + O3  = C8BC + 2 CO2                     : {%TrGTer} 1.35E-15{§§0.25}*EXP(-1270./temp)*(.104+.167)/(1.-.027); {&3018, 1745}
<G40284>  SABINENE  + NO3 = LNBPINABO2                       : {%TrGTer} 2.51E-12{§}; {&1745} // Products from \citet{2419}.
// CAMPHENE assumed to react like BPINENE
<G40285a> CAMPHENE  + OH  = BPINAO2                          : {%TrGTer} 1.47E-11{§}*EXP(467./temp)*(0.8326*0.3+0.068)/(0.8326+0.068); {&3029} // Products from \citet{3019}.
<G40285b> CAMPHENE  + OH  = ROO6R1O2                         : {%TrGTer} 1.47E-11{§}*EXP(467./temp)*0.8326*0.7/(0.8326+0.068); {&3019, 3029} // Products from \citet{3019}.
<G40286a> CAMPHENE  + O3  = NOPINONE + .63 CO + .37 HOCH2OOH + .16 OH + .16 HO2 : {%TrGTer} 1.35E-15{§§0.25}*EXP(-1270./temp)*.051/(1.-.027); {&1745} // Products from \citet{3018}.
<G40286b> CAMPHENE  + O3  = NOPINOO + CO2                    : {%TrGTer} 1.35E-15{§§0.25}*EXP(-1270./temp)*.368/(1.-.027); {&3018, 1745}
<G40286c> CAMPHENE  + O3  = NOPINDO2 + CO2 + OH              : {%TrGTer} 1.35E-15{§§0.25}*EXP(-1270./temp)*.283/(1.-.027); {&3018, 1745}
<G40286d> CAMPHENE  + O3  = C8BC + 2 CO2                     : {%TrGTer} 1.35E-15{§§0.25}*EXP(-1270./temp)*(.104+.167)/(1.-.027); {&3018, 1745}
<G40287>  CAMPHENE  + NO3 = LNBPINABO2                       : {%TrGTer} 2.51E-12{§}; {&1745} // Products from \citet{2419}.

// aromatics-related (G40400...G40599):
<G40400> LHAROM + OH  = .14 TLEPOXMUC + .03 C6H5CH2O2 + .04 CRESOL + .79 TLBIPERO2 + .18 HO2 + 4 LCARBON : {%TrGAro} 5.67E-11{§}; {&2419} // DIET35TOL(from MCM) as representative of higher aromatics
<G40401> LHAROM + NO3 = C6H5CH2O2 + HNO3 + 4 LCARBON                                                     : {%TrGAro} 2.60E-15{§}; {&2419} // Same products as for toluene.

{<G5nnn> ------------------------------- F -------------------------}{@\myhline}

{<G6nnn> ------------------------------- Cl ------------------------}{@\myhline}

// Cl + O (#G61nn)
<G6100>  Cl + O3         = ClO + O2    : {%UpStTrG} 2.8E-11{§§0.06}*EXP(-250./temp); {&1845}
<G6101>  ClO + O3P       = Cl + O2     : {%UpStG}   2.5E-11{§§0.6}*EXP(110./temp); {&1845}
<G6102a> ClO + ClO       = Cl2 + O2    : {%StTrG}   1.0E-12{§§0.2}*EXP(-1590./temp); {&1845}
<G6102b> ClO + ClO       = 2 Cl + O2   : {%StTrG}   3.0E-11{§§0.2}*EXP(-2450./temp); {&1845}
<G6102c> ClO + ClO       = Cl + OClO   : {%StTrG}   3.5E-13{§§0.2}*EXP(-1370./temp); {&1845}
<G6102d> ClO + ClO {+M}  = Cl2O2       : {%StTrG}   k_ClO_ClO; {&3245}
<G6103>  Cl2O2 {+M}      = ClO + ClO   : {%StTrG}   k_ClO_ClO/(2.16E-27{§1.4}*EXP(8537./temp)); {&3245} // The rate coefficient is defined as backward reaction divided by equilibrium constant.

// Cl + H (#G62nn)
<G6200>  Cl + H2         = HCl + H     : {%StG}     3.9E-11{§§0.1}*EXP(-2310./temp); {&1845}
<G6201a> Cl + HO2        = HCl + O2    : {%StG}     4.4E-11-7.5E-11{§§0.2}*EXP(-620./temp); {&1845}
<G6201b> Cl + HO2        = ClO + OH    : {%StG}     7.5E-11{§§0.2}*EXP(-620./temp); {&1845}
<G6202>  Cl + H2O2       = HCl + HO2   : {%StTrG}   1.1E-11{§§0.2}*EXP(-980./temp); {&1845}
<G6203>  ClO + OH        = .94 Cl + .94 HO2 + .06 HCl + .06 O2 : {%StG} 7.3E-12{§§0.15}*EXP(300./temp); {&1845}
<G6204>  ClO + HO2       = HOCl + O2   : {%StTrG}   2.2E-12{§§0.2}*EXP(340./temp); {&1845} // At low temperatures, there may be a minor reaction channel leading to \kpp{O3}+\kpp{HCl}. See \citet{1626} for details. It is neglected here.
<G6205>  HCl + OH        = Cl  + H2O   : {%StTrG}   1.7E-12{§§0.06}*EXP(-230./temp); {&1845}
<G6206>  HOCl + OH       = ClO + H2O   : {%StG}     3.0E-12{§3.0}*EXP(-500./temp); {&3245}

// Cl + N (#G63nn)
<G6300>  ClO   + NO       = NO2 + Cl   : {%UpStTrG} 6.2E-12{§§0.1}*EXP(295./temp); {&1845}
<G6301>  ClO   + NO2 {+M} = ClNO3      : {%StTrG}   k_3rd_iupac(temp,cair,1.6E-31{§§0.1},3.4,7.E-11{§§0.5},0.,0.4); {&1845}
<G6302>  ClNO3            = ClO + NO2  : {%TrG}     6.918E-7{§1.4}*EXP(-10909./temp)*cair; {&1059} {10^(+/-0.15)}
<G6303>  ClNO3 + O3P      = ClO + NO3  : {%StG}     4.5E-12{§§0.08}*EXP(-900./temp); {&1845}
<G6304>  ClNO3 + Cl       = Cl2 + NO3  : {%StTrG}   6.2E-12{§§0.1}*EXP(145./temp); {&1845}

// Cl + C (#G64nn)
<G6400>  Cl      + CH4    = HCl + CH3         : {%StTrG} 6.6E-12{§§0.06}*EXP(-1240./temp); {&1759}
<G6401>  Cl      + HCHO   = HCl + CO + HO2    : {%StTrG} 8.1E-11{§§0.06}*EXP(-34./temp); {&1759}
<G6402>  Cl      + CH3OOH = HCHO + HCl + OH   : {%StTrG} 5.9E-11{§§0.5}; {&1759} // The initial products are probably \chem{HCl} and \chem{CH_2OOH} \citep{1759}. It is assumed that \chem{CH_2OOH} dissociates into \chem{HCHO} and \chem{OH}.
<G6403>  ClO     + CH3O2  = HO2 + Cl + HCHO   : {%StTrG} 1.8E-12{§1.1}*EXP(-600./temp); {&3245}
<G6404>  CCl4    + O1D    = LCARBON + ClO + 3 Cl {+...} : {%StG} 3.3E-10{§1.15}; {&3245}
<G6405>  CH3Cl   + O1D    = 0.1 CH3Cl + 0.1 O3P + 0.46 ClO + 0.35 Cl + 0.09 H + 0.9 LCARBON + 0.09 LCHLORINE {+...} : {%StG} 1.65E-10{§}; {&3245}
<G6406>  CH3Cl   + OH     = LCARBON + H2O + Cl {+...} : {%StG} 1.96E-12{§1.1}*EXP(-1200./temp); {&3245}
<G6407>  CH3CCl3 + O1D    = 2 LCARBON + OH + 3 Cl {+...} : {%StG} 3.25E-10{§1.4}; {&3245}
<G6408>  CH3CCl3 + OH     = 2 LCARBON + H2O + 3 Cl {+...} : {%StTrG} 1.64E-12{§1.1}*EXP(-1520./temp); {&3245}
<G6409>  Cl + C2H4 {+O2}  = HOCH2CH2O2 + HCl  : {%TrG} k_3rd_iupac(temp,cair,1.85E-29{§§0.5},3.3,6.0E-10{§§0.3},0.0,0.4); {&1759} // It is assumed that the reaction liberates all \kpp{Cl} atoms in the form of \kpp{HCl}.
<G6410>  Cl      + CH3CHO = HCl + CH3CO      : {%TrG} 8.0e-11{§§0.07}; {&1759}
<G6411>  C2H2    + Cl     = LCARBON + CH3 + HCl       : {%TrG} k_3rd_iupac(temp,cair,6.1e-30{§§0.3},3.0,2.0e-10{§§0.3},0.,0.6); {&1759}
<G6412>  C2H6    + Cl     = C2H5O2 + HCl       : {%TrG} 8.3E-11{§§0.06}*EXP(-100./temp); {&1759}

<G6413>  Cl      + CH3NO3 = HCl + HCHO + NO2   : {%StTrG} 1.3E-11{§1.5}*EXP(-1200./temp); {&3245}
<G6414>  Cl      + CH3ONO = HCl + HCHO + NO    : {%StTrG} 2.1E-12{§}; {&3063}
<G6415>  Cl      + CH3O2  = .5 ClO + .5 CH3O + .5 HCl + .5 CH2OO : {%StTrG} 1.6E-10{§1.5}; {&3245}
<G6416>  Cl      + CH3CN  = NCCH2O2 + HCl      : {%TrG} 1.6E-11{§}*EXP(-2104./temp); {&3211, 3212, 3264}

// Cl + F (#G65nn)
<G6500>  CF2Cl2  + O1D    = LCARBON + 2 LFLUORINE + ClO + Cl {+...}   : {%StG} 1.4E-10{§1.15}; {&3245}
<G6501>  CFCl3   + O1D    = LCARBON + LFLUORINE + ClO + 2 Cl {+...} : {%StG} 2.3E-10{§1.1}; {&3245}

{<G7nnn> ------------------------------- Br ------------------------}{@\myhline}

// Br + O (#G71nn)
<G7100>  Br   + O3       = BrO + O2       : {%StTrG}   1.7E-11{§§0.08}*EXP(-800./temp); {&1845}
<G7101>  BrO  + O3P      = Br + O2        : {%StG}     1.9E-11{§§0.2}*EXP(230./temp); {&1845}
<G7102a> BrO  + BrO      = 2 Br + O2      : {%StTrG}   2.7E-12{§§0.1}; {&1845}
<G7102b> BrO  + BrO      = Br2 + O2       : {%StTrG}   2.9E-14{§§0.1}*EXP(840./temp); {&1845}

// Br + H (#G72nn)
<G7200>  Br   + HO2      = HBr + O2       : {%StTrG}   7.7E-12{§§0.2}*EXP(-450./temp); {&1845}
<G7201>  BrO  + HO2      = HOBr + O2      : {%StTrG}   4.5E-12{§§0.3}*EXP(500./temp); {&1845}
<G7202>  HBr  + OH       = Br  + H2O      : {%StTrG}   6.7E-12{§§0.1}*EXP(155./temp); {&1845}
<G7203>  HOBr + O3P      = OH  + BrO      : {%StG}     1.2E-10{§§0.2}*EXP(-430./temp); {&1845}
<G7204>  Br2  + OH       = HOBr + Br      : {%StTrG}   2.0E-11{§§0.1}*EXP(240./temp); {&1845}

// Br + N (#G73nn)
<G7300>  Br   + BrNO3    = Br2 + NO3      : {%TrG}    4.9E-11{§1.31}{4.9+/-1.5}; {&1054}
<G7301>  BrO  + NO       = Br  + NO2      : {%StTrG}  8.7E-12{§§0.1}*EXP(260./temp); {&1845}
<G7302>  BrO  + NO2 {+M} = BrNO3          : {%StTrG}  k_BrO_NO2; {&1845} // The rate coefficient is: \code{k_BrO_NO2} = \code{k_3rd(temp,cair,5.2E-31,3.2,6.9E-12,2.9,0.6)}.
<G7303>  BrNO3           = BrO + NO2      : {%TrG}    k_BrO_NO2/(5.44E-9*EXP(14192./temp)*1.E6*R_gas*temp/(atm2Pa*N_A)); {&1054, 1845} // The rate coefficient is defined as backward reaction \citep{1845} divided by equilibrium constant \citep{1054}.

// Br + C (#G74nn)
<G7400>  Br   + HCHO     = HBr + CO + HO2   : {%StTrG} 7.7E-12{§§0.15}*EXP(-580./temp); {&1759}
<G7401>  Br   + CH3OOH   = CH3O2 + HBr      : {%TrG} 2.6E-12{§2.}{10^(+/-0.3)}*EXP(-1600./temp); {&416}
<G7402>  BrO  + CH3O2    = HOBr + CH2OO     : {%TrG} 2.42E-14{§}*EXP(1617./temp); {&3205}
<G7403>  CH3Br + OH      = LCARBON + H2O + Br {+...} : {%StTrG} 1.42E-12{§1.07}*EXP(-1150./temp); {&3245}
<G7404>  Br + C2H4 {+O2} = HOCH2CH2O2 + HBr : {%TrG} 2.8E-13{§§0.15}*EXP(224./temp)/(1.+1.13E24*EXP(-3200./temp)/C(ind_O2)); {&1759} // It is assumed that the reaction liberates all \kpp{Br} atoms in the form of \kpp{HBr}.
<G7405>  Br   + CH3CHO   = HBr + CH3CO     : {%TrG} 1.8e-11{§§0.2}*EXP(-460./temp); {&1759}
<G7406>  Br   + C2H2     = LCARBON + CH3O2 + HBr       : {%TrG} 6.35e-15{§§0.2}*EXP(440./temp); {&1759}
<G7407>  CHBr3  + OH     = LCARBON + H2O + 3 Br {+...} : {%TrG} 9.0E-13{§1.05}*EXP(-360./temp); {&3245} // It is assumed that the reaction liberates all \kpp{Br} atoms. The fate of the carbon atom is currently not considered.
<G7408>  CH2Br2 + OH     = LCARBON + H2O + 2 Br {+...} : {%TrG} 2.0E-12{§1.1}*EXP(-840./temp); {&3245} // It is assumed that the reaction liberates all \kpp{Br} atoms. The fate of the carbon atom is currently not considered.

// Br + F (#G75nn)

// Br + Cl (#G76nn)
<G7600>  Br   + BrCl     = Br2  + Cl        : {%TrG}   3.32E-15{§}; {&2517}
<G7601>  Br   + Cl2      = BrCl + Cl        : {%TrG}   1.10E-15{§1.4}{1.1+/-0.4}; {&2518}
<G7602>  Br2  + Cl       = BrCl + Br        : {%TrG}   2.3E-10{§1.2}{2.3+/-0.4}*EXP(135./temp); {&2519}
<G7603a> BrO  + ClO      = Br   + OClO      : {%StTrG} 1.6E-12{§§0.1}*EXP(430./temp); {&1845}
<G7603b> BrO  + ClO      = Br   + Cl + O2   : {%StTrG} 2.9E-12{§§0.1}*EXP(220./temp); {&1845}
<G7603c> BrO  + ClO      = BrCl + O2        : {%StTrG} 5.8E-13{§§0.1}*EXP(170./temp); {&1845}
<G7604>  BrCl + Cl       = Br   + Cl2       : {%TrG}   1.45E-11{§1.1}{1.45+/-0.2}; {&2520}
<G7605>  CHCl2Br + OH    = LCARBON + 2 Cl + H2O + Br : {%TrG} 2.0E-12{§}*EXP(-840./temp); // Same value as for G7408: \kpp{CH2Br2}+\kpp{OH} assumed. It is assumed that the reaction liberates all \kpp{Br} and \kpp{Cl} atoms. The fate of the carbon atom is currently not considered.
<G7606>  CHClBr2 + OH    = LCARBON + Cl + H2O + 2 Br : {%TrG} 2.0E-12{§}*EXP(-840./temp); // Same value as for G7408: \kpp{CH2Br2}+\kpp{OH} assumed. It is assumed that the reaction liberates all \kpp{Br} and \kpp{Cl} atoms. The fate of the carbon atom is currently not considered.
<G7607>  CH2ClBr + OH    = LCARBON + Cl + H2O + Br   : {%TrG} 2.1E-12{§1.07}*EXP(-880./temp); {&3245} // It is assumed that the reaction liberates all \kpp{Br} and \kpp{Cl} atoms. The fate of the carbon atom is currently not considered.

{<G8nnn> ------------------------------- I -------------------------}{@\myhline}

// I + O (#G81nn)
<G8100>  I     + O3    = IO + O2           : {%TrG} 2.1E-11{§§0.05}*EXP(-830./temp); {&1845}
//<G8101> deleted I2O2          = 2 IO              : {%TrG} 20.;
<G8102>  OIO   + OIO   = IPART             : {%TrG} 5.E-11{§}; {&1456} // Consistent with \citet{3369}, it is assumed that the reaction produces new particles.
<G8103>  IO    + IO    = .38 OIO + 1.62 I + .62 O2 : {%TrG} 5.4E-11{§§0.1}*EXP(180./temp); {&1845} // The yield of 38~\unit{\%} \chem{OIO} is from \citet{1845}. It is assumed here that the remaining 62~\unit{\%} produce 2 \chem{I} + \chem{O_2}.
// I + H (#G82nn)
<G8200>  I     + HO2   = HI  + O2          : {%TrG} 1.5E-11{§§0.3}*EXP(-1090./temp); {&1845}
<G8201>  IO    + HO2   = HOI + O2          : {%TrG} 1.4E-11{§§0.2}*EXP(540./temp); {&1845}
<G8202>  HI    + OH    = I   + H2O         : {%TrG} 1.6E-11{§§0.3}*EXP(440./temp); {&1845}
<G8203>  OIO   + OH    = HIO3              : {%TrG} 2.2E-10{§1.22}*EXP(243./temp); {&1788}
<G8204>  I2    + OH    = HOI + I           : {%TrG} 2.1E-10{§§0.15}; {&1845}
<G8205>  HOI   + OH    = IO + H2O          : {%TrG} 5.0E-12{§1.24}{5+/-1.2}; {&3370}
// I + N (#G83nn)
<G8300>  I + NO2 {+M}  = INO2              : {%TrG} k_I_NO2; {&1845} // The rate coefficient is: \code{k_I_NO2} = \code{k_3rd_iupac(temp,cair,3.E-31,1.,6.6E-11,0.,0.63)}.
<G8301>  I     + NO3   = IO + NO2          : {%TrG} 1.E-10{§1.30}{1.0+/-0.3}; {&2244}
<G8302>  IO    + NO    = I  + NO2          : {%TrG} 7.15E-12{§§0.15}*EXP(300./temp); {&1845}
<G8303>  IO + NO2 {+M} = INO3              : {%TrG} k_3rd_iupac(temp,cair,7.7E-31{§§0.3},5.,1.6E-11{§§0.3},0.,0.4); {&1845}
<G8304>  OIO   + NO    = NO2 + IO          : {%TrG} 1.1E-12{§§0.3}*EXP(542./temp); {&1845}
<G8305>  INO2          = I + NO2           : {%TrG} k_I_NO2/(3.7E-7{§2.}{10^(+/-0.3)}*EXP(9568./temp)*1.E6*R_gas*temp/(atm2Pa*N_A)); {&1644, 1845} // The rate coefficient is defined as backward reaction \citep{1845} divided by equilibrium constant \citep{1644}.
<G8306>  INO3          = IO + NO2          : {%TrG} 2.1e15{§}*EXP(-13670./temp); {&2314}
<G8307>  I2    + NO3   = I + INO3          : {%TrG} 1.5E-12{§§0.5}; {&1845}
<G8308>  IO    + NO3   = OIO + NO2         : {%TrG} 9.E-12{§1.4}{9+/-4}; {&2244}
<G8309>  I + INO3      = I2 + NO3          : {%TrG} 9.1E-11*EXP(-146./temp){§}; {&2314} {back rxn of G8307}
// I + C (#G84nn)
<G8400>  C3H7I + OH    = 2 LCARBON + CH3O2 + I      : {%TrG} 1.22E-12{§1.05}{1.22+/-0.06}; {&1503}
<G8401>  CH3O2 + IO    = .4 I + .6 OIO + HCHO + HO2 : {%TrG} 2.E-12{§1.5}{2.0+/-1.0}; {&2079, 2089} // The rate coefficient is from \citet{2079}, the yield of \chem{I} atoms is a lower limit given on page 2170 of \citet{2089}.
<G8402>  CH3I + NO3 {+O2} = HNO3 + HCHO + IO        : {%TrG} 3.4E-17{§}; {&94} // The products are from \citet{2087}.
// I + F (#G85nn)
// I + Cl (#G86nn)
<G8600>  IO    + ClO   = .2 ICl + .25 Cl + .55 OClO + .8 I + .45 O2 : {%TrG} 4.7E-12{§§0.1}*EXP(280./temp); {&1845} {products: 20% ICl+O2, 25% I+Cl+O2, 55% I+OClO}
// I + Br (#G87nn)
<G8700>  I     + BrO   = IO + Br                    : {%TrG} 1.2E-11{§2.0}; {&3245}
<G8701>  IO    + BrO   = Br + .8 OIO + .2 I + .2 O2 : {%TrG} 1.5E-11{§§0.1}*EXP(510./temp); {&1845} // 80\% \chem{Br} + \chem{OIO} production is from \citet{1845}. The remaining channels are assumed to produce \chem{Br} + \chem{I} + \chem{O_2}.
<G8702>  IBr   + OH    = .84 HOI + .84 Br + .16 HOBr + .16 I : {%TrG} 1.4E-10{§1.28}{1.4+/-0.4}; {&3370}
<G8703>  IO    + Br    = I + BrO                    : {%TrG} 2.3E-11{§1.13}{2.3+/-0.3}; {&3371} {back rxn of G8700}
<G8704>  I2    + Br    = IBr + I                    : {%TrG} 1.2E-10{§1.13}{1.2+/-0.15}; {&3371}

{<G9nnn> ------------------------------- S -------------------------}{@\myhline}

// S + O (#G91nn)
//<G9100>  SO + O2        = SO2 + O3P           : {%StG} 1.25E-13*EXP(-2190./temp); {&1945}{§1.3}
//<G9101>  SO + O3        = SO2 + O2            : {%StG} 3.4E-12*EXP(-1100./temp); {&1945}{§1.1}
//<G9102>  S  + O2        = SO + O3P            : {%StG} 2.3E-12{§1.2}; {&1945}

// S + H (#G92nn)
<G9200>  SO2 + OH {+O2+H2O} = H2SO4 + HO2         : {%StTrG} k_3rd(temp,cair,3.3E-31,4.3,1.6E-12,0.,0.6){§1.1}; {&3245}
//<G9201>  SH + O2        = OH + SO             : {%StG} 4.E-19; {&1945} {upper limit}

// S + N (#G93nn)

// S + C (#G94nn)
<G9400a> DMS    + OH    = CH3SO2 + HCHO       : {%TrG} 1.13E-11{§§0.10}*EXP(-253./temp); {&1610} // For the abstraction path, the assumed reaction sequence (omitting \chem{H_2O} and \chem{O_2} as products) according to \citet{243} is: \begin{eqnarray*} \chem{DMS} + \chem{OH} & \TO & \chem{CH_3SCH_2}\\ \chem{CH_3SCH_2} + \chem{O_2} & \TO & \chem{CH_3SCH_2OO}\\ \chem{CH_3SCH_2OO} + \chem{NO} & \TO & \chem{CH_3SCH_2O} + \chem{NO_2}\\ \chem{CH_3SCH_2O} & \TO & \chem{CH_3S} + \chem{HCHO}\\ \chem{CH_3S} + \chem{O_3} & \TO & \chem{CH_3SO}\\ \chem{CH_3SO} + \chem{O_3} & \TO & \chem{CH_3SO_2}\\ \hline \chem{DMS}+\chem{OH}+\chem{NO}+2\chem{O_3} & \TO & \chem{CH_3SO_2}+\chem{HCHO}+\chem{NO_2} \end{eqnarray*} Neglecting the effect on \chem{O_3} and \chem{NO_x}, the remaining reaction is: $$\chem{DMS} + \chem{OH} + \chem{O_3} \TO \chem{CH_3SO_2} + \chem{HCHO}$$.
<G9400b> DMS    + OH    = DMSO + HO2          : {%TrG} k_DMS_OH; {&1610} // For the addition path, the rate coefficient is: \code{k_DMS_OH} = \code{1.0E-39*EXP(5820./temp)*C(ind_O2)/ (1.+5.0E-30*EXP(6280./temp)*C(ind_O2))}.
<G9401>  DMS    + NO3   = CH3SO2 + HNO3 + HCHO  {-O3} : {%TrG} 1.9E-13{§§0.15}*EXP(520./temp); {&1610}
<G9402>  DMSO   + OH    = .6 SO2 +  HCHO + .6 CH3 + .4 HO2 + .4 CH3SO3H : {%TrG} 1.E-10{§1.3}{1.0+/-0.3}; {&746} // Products and yields are not from \citet{746}.
<G9403>  CH3SO2         = SO2 + CH3         : {%TrG} 1.8E13{§}*EXP(-8661./temp); {&749}
<G9404>  CH3SO2 + O3    = CH3SO3            : {%TrG} 3.E-13{§}; {&749}
<G9405>  CH3SO3 + HO2   = CH3SO3H           : {%TrG} 5.E-11{§}; {&749}
//<G9406>  OCS + OH       = SH + CO2        : {%StG} 1.1e-13{§2.0}*EXP(-1200./temp); {&1945}
//<G9407>  OCS + O3P      = CO + SO         : {%StG} 2.1e-11{§1.15}*EXP(-2200./temp); {&1945}
<G9408>  CH2OO + SO2 {+H2O} = H2SO4 + HCHO  : {%StTrG} k_CH2OO_SO2; {&3041, 3049} // Average of 3.9E-11 and 3.42E-11.
<G9409>  NOPINOO + SO2 = NOPINONE + H2SO4   : {%TrGTer} 7.E-14{§}; {&2419}
<G9410>  APINAOO + SO2 = PINAL + H2SO4      : {%TrGTer} 7.00E-14{§}; {&2419}
<G9411>  APINBOO + SO2 = PINAL + H2SO4      : {%TrGTer} 7.00E-14{§}; {&2419}
<G9412>  MBOOO + SO2   = IBUTALOH + H2SO4   : {%TrGTer} 7.00E-14; {&2419}

// S + F (#G95nn)

// S + Cl (#G96nn)
<G9600>  DMS + Cl       = CH3SO2 + HCl + HCHO : {%TrG} 3.3E-10{§§0.15}; {&1610}

// S + Br (#G97nn)
<G9700>  DMS + Br       = CH3SO2 + HBr + HCHO : {%TrG} 9.E-11{§1.32}{9.0+/-2.9}*EXP(-2386.{§1.06}{2386+/-151}/temp); {&299}
<G9701>  DMS + BrO      = DMSO + Br           : {%TrG} 4.4E-13{§1.15}{4.4+/-0.66}; {&932}

// S + I (#G98nn)
//wrong: <G9800>  DMS + IO       = DMSO + I            : {%TrG} 1.2E-16*EXP(2230./temp); {&1598}
<G9800>  DMS + IO       = DMSO + I            : {%TrG} 3.2E-13{§1.44}{3.2+/-1.4}*EXP(-925.{§1.15}{925+/-136}/temp); {&2080}

{<G10nnn> ------------------------------- Hg ------------------------}{@\myhline}

// Hg + O (#G101nn)
//<G10100>  Hg + O3     = HgO + O2            : {%TrG} 8.43E-17*EXP(-1407./temp); {&2253}
<G10100>  Hg + O3       = HgO + O2            : {%TrG} 3.0E-20{§1.66}{3+/-2}; {&2394}

// Hg + H (#G102nn)
<G10200>  Hg + OH       = HgO + H             : {%TrG} 3.55E-14{§1.14}{9+/-1.3}*EXP(294.{§1.05}{294+/-16}/temp); {&2252}
<G10201>  Hg + H2O2     = HgO + H2O           : {%TrG} 8.5E-19{§}; {&2248} // Upper limit.

// Hg + Cl (#G106nn)
<G10600>  Hg + Cl       = HgCl                : {%TrG} 1.0E-11{§1.20}{1.0+/-0.2}; {&2246}
<G10601>  Hg + Cl2      = HgCl2               : {%TrG} 2.6E-18{§1.08}{2.6+/-0.2}; {&2246}

// Hg + Br (#G107nn)
<G10700>  Hg + Br       = HgBr                : {%TrG} 3.0E-13{§}; {&2282}
<G10701>  HgBr + Br     = HgBr2               : {%TrG} 2.5E-10*(temp/298.)**(-0.57); {&2274}
<G10702>  Hg + Br2      = HgBr2               : {%TrG} 9.0E-17{§1.22}{9+/-2}; {&2246}
<G10703>  Hg + BrO      = HgO + Br            : {%TrG} 1.0E-15{§}; {&2261}{lower limit}
<G10704>  HgBr + BrO    = BrHgOBr             : {%TrG} 3.0E-12{§}; {&2273}
<G10705>  HgCl + BrO    = ClHgOBr             : {%TrG} 3.0E-12{§}; {&2273}
<G10706>  HgBr + Cl     = ClHgBr              : {%TrG} 3.0E-12{§}; {&2273}
<G10707>  HgCl + Br     = ClHgBr              : {%TrG} 3.0E-12{§}; {&2273}

// ------------------------------- hv ------------------------

// mz_ab_20101116+
{<J0nnn> ------------------------------- e* ------------------------}{@\myhline}
<J0001>  O3P {+e*}      = Op  + em {+e*}      : {%UpGJ} jx(ip_Op_em)    +jx(ip_se_Op_em); {&2616}
<J0002a> O2  {+e*}      = O2p + em {+e*}      : {%UpGJ} jx(ip_O2p_em)   +jx(ip_se_O2_b1); {&2616}
<J0002b> O2  {+e*}      = Op + O3P + em {+e*} : {%UpGJ} jx(ip_Op_O_em)  +jx(ip_se_O2_b2); {&2616}
<J0003a> N2  {+e*}      = N2p + em {+e*}      : {%UpGJ} jx(ip_N2p_em)   +jx(ip_se_N2_b1); {&2616}
<J0003b> N2  {+e*}      = Np  + N + em {+e*}  : {%UpGJ} jx(ip_Np_N_em)  +jx(ip_se_N2_b2); {&2616}
<J0003c> N2  {+e*}      = Np + N2D + em {+e*} : {%UpGJ} jx(ip_Np_N2D_em)+jx(ip_se_N2_b3); {&2616}
<J0003d> N2  {+e*}      = N + N2D {+e*}       : {%UpGJ} jx(ip_N_N2D_em) +jx(ip_se_N2_b4); {&2616}
// mz_ab_20101116-

{<J1nnn> ------------------------------- O -------------------------}{@\myhline}

// O only (#J10nn)
<J1000a> O2      + hv = O3P + O3P             : {%UpStTrGJ} jx(ip_O2){§}; {&2342}
<J1000b> O2      + hv = O3P + O1D             : {%UpGJ}     jx(ip_O3PO1D); {&2342}
<J1000c> O2      + hv = O2p + em              : {%UpGJ}     jx(ip_O2_b1){§}; {&2342}
<J1000d> O2      + hv = Op + O3P + em         : {%UpGJ}     jx(ip_O2_b2){§}; {&2342}
<J1001a> O3      + hv = O1D + O2              : {%UpStTrGJ} jx(ip_O1D){§}; {&2342}
<J1001b> O3      + hv = O3P + O2              : {%UpStTrGJ} jx(ip_O3P){§}; {&2342}
<J1002>  O3P     + hv = Op + em               : {%UpGJ}     jx(ip_O3Pp){§}; {&2342}

{<J2nnn> ------------------------------- H -------------------------}{@\myhline}

// H + O (#J21nn)
<J2100a> H2O     + hv = H + OH     : {%UpStGJ}   jx(ip_H2O){§}; {&2342}
<J2100b> H2O     + hv = H2 + O1D   : {%UpGJ}     jx(ip_H2O1D){§}; {&2342}
<J2101>  H2O2    + hv = 2 OH       : {%UpStTrGJ} jx(ip_H2O2){§}; {&2342}

{<J3nnn> ------------------------------- N -------------------------}{@\myhline}

// N only (#J30nn)
<J3000a> N2      + hv = N2p + em          : {%UpGJ} jx(ip_N2_b1){§}; {&2342}
<J3000b> N2      + hv = Np + N + em       : {%UpGJ} jx(ip_N2_b2){§}; {&2342}
<J3000c> N2      + hv = Np + N2D + em     : {%UpGJ} jx(ip_N2_b3){§}; {&2342}
<J3000d> N2      + hv = N  + N2D          : {%UpGJ} jx(ip_NN2D){§}; {&2342}

// N + O (#J31nn)
<J3100>  N2O     + hv = O1D + N2   : {%UpStGJ}    jx(ip_N2O){§}; {&2342}
<J3101>  NO2     + hv = NO + O3P   : {%UpStTrGJ}  jx(ip_NO2){§}; {&2342}
<J3102a> NO      + hv = N + O3P    : {%UpStGJ}    jx(ip_NO){§}; {&2342}
<J3102b> NO      + hv = NOp + em   : {%UpGJ}      jx(ip_NOp){§}; {&2342}
<J3103a> NO3     + hv = NO2 + O3P  : {%UpStTrGJ}  jx(ip_NO2O){§}; {&2342}
<J3103b> NO3     + hv = NO  + O2   : {%UpStTrGJ}  jx(ip_NOO2){§}; {&2342}
<J3104>  N2O5    + hv = NO2 + NO3  : {%StTrGJ}    jx(ip_N2O5){§}; {&2342}
// mz_rs_20130130+
// The second path (to NO + O) is switched off.
// JPL2011 recommends a quantum yield qy=0 for lambda > 300 nm but has no
// recommendation for lambda <= 300 nm
//<J3104b> N2O5    + hv = NO + O3P + NO3  : {%StGJ} jx(ip_NO3NOO){§}; {&2342}
// mz_rs_20130130-

// N + H (#J32nn)
<J3200>  HONO    + hv = NO + OH    : {%TrGJ} jx(ip_HONO){§}; {&2342}
<J3201>  HNO3    + hv = NO2 + OH   : {%StTrGJ} jx(ip_HNO3){§}; {&2342}
<J3202>  HNO4    + hv = .667 NO2 + .667 HO2 + .333 NO3 + .333 OH : {%StTrGJ} jx(ip_HNO4){§}; {&2342}

{<J4nnn> ------------------------------- C -------------------------}{@\myhline}

// 1C (#J41nnn)
<J41000>  CH3OOH      + hv = CH3O + OH                  : {%StTrGJ} jx(ip_CH3OOH){§}; {&2342}
<J41001a> HCHO        + hv = H2 + CO                    : {%StTrGJ} jx(ip_COH2){§}; {&2342}
<J41001b> HCHO        + hv = H + CO + HO2               : {%StTrGJ} jx(ip_CHOH){§}; {&2342}
<J41002>  CO2         + hv = CO + O3P                   : {%StGJ}   jx(ip_CO2){§}; {&2342}
<J41003>  CH4         + hv = .42 CH3 + .42 H + .6912 H2 + .0864 HCHO + .0864 O3P + .1584 OH + .1584 HO2 + .2112 CO2 + .1824 CO + .024 H2O + .10 LCARBON : {%StGJ} jx(ip_CH4){§}; {&2342} // \chem{CH_3}- and \chem{CH_2}-channels are considered only and with their branching ratios being 0.42 and 0.48, respectively \citep{3058}. \chem{CH}-production is neglected. \chem{CH_2} is assumed to react only with O2 yielding 1.44 \chem{H_2} + 0.18 \chem{HCHO} + 0.18 \chem{O(^3P)} + 0.33 \chem{OH} + 0.33 \chem{HO_2} + 0.44 \chem{CO_2} + 0.38 \chem{CO} + 0.05 \chem{H_2O} as assumed in the WACCM model by J. Orlando (Doug Kinnison, pers. comm. with D. Taraborrelli).
<J41004>  CH3ONO      + hv = CH3O + NO                  : {%StTrGJ} jx(ip_CH3ONO); {&2342}
<J41005>  CH3NO3      + hv = CH3O + NO2                 : {%StTrGJ} jx(ip_CH3NO3); {&2342}
<J41006>  CH3O2NO2    + hv = .667 NO2 + .667 CH3O2 + .333 NO3 + .333 CH3O : {%StTrGJ} jx(ip_CH3O2NO2); {&2342} // product distribution as for HNO4
<J41007>  HOCH2OOH    + hv = HCOOH + OH + HO2           : {%StTrGJ} jx(ip_CH3OOH); {&2342}
<J41008>  CH3O2       + hv = HCHO + OH                  : {%StTrGJ} jx(ip_CH3O2); {&2342}
<J41009>  HCOOH       + hv = CO + HO2 + OH              : {%StTrGJ} jx(ip_HCOOH); {&2342}
<J41010>  HOCH2O2NO2  + hv = .667 NO2 + .667 HOCH2O2 + .333 NO3 + .333 HCOOH + .333 HO2 : {%StTrGJ} jx(ip_CH3O2NO2); {&2342}

// 2C (#J42nnn)
<J42000>  C2H5OOH     + hv = CH3CHO + HO2 + OH        : {%TrGJ}  jx(ip_CH3OOH); {&1612}
<J42001a> CH3CHO      + hv = CH3 + HO2 + CO           : {%TrGJ}  jx(ip_CH3CHO); {&2342}
<J42001b> CH3CHO      + hv = CH2CHOH                  : {%TrGJ}  jx(ip_CH3CHO2VINY); {&3160}
<J42002>  CH3CO3H     + hv = CH3 + OH  + CO2          : {%TrGJ}  jx(ip_CH3CO3H); {&2342}
//<J42003> NACA was deleted
<J42004>  PAN         + hv = .7 CH3CO + .7 NO2 + .3 CH3 + .3 CO2 + .3 NO3 : {%TrGJ} jx(ip_PAN); {&2342} // Quantum yields from \citet{3245}.
<J42005a> HOCH2CHO    + hv = HCHO + 2 HO2 + CO        : {%TrGJ}  jx(ip_HOCH2CHO)*0.83; {&2342} // Quantum yields from \citet{3245}.
<J42005b> HOCH2CHO    + hv = OH + HCOCH2O2            : {%TrGJ}  jx(ip_HOCH2CHO)*0.07; {&2342} // Quantum yields from \citet{3245}.
<J42005c> HOCH2CHO    + hv = CH3OH + CO               : {%TrGJ}  jx(ip_HOCH2CHO)*0.10; {&2342} // Quantum yields from \citet{3245}.
<J42006>  HOCH2CO3H   + hv = HCHO + HO2 + OH + CO2    : {%TrGJ}  jx(ip_CH3OOH); {&2419}
<J42007>  PHAN        + hv = .7 HOCH2CO + .7 NO2 + .3 HCHO + .3 HO2 + .3 CO2 + .3 NO3 : {%TrGJ} jx(ip_PAN); // It is assumed that J(\kpp{PHAN}) is the same as J(\kpp{PAN}).
// currently only one path for J42008, in the future, the others must be added to JVAL:
<J42008>  GLYOX       + hv = 2 CO + 2 HO2          : {%TrGJ} jx(ip_GLYOX){§}; {&2342}
// <J42008a>  GLYOX   + hv = 2 CO + 2 HO2          : {%TrGJ} jx(ip_GLYOXa){§}; {&2342}
// <J42008b>  GLYOX   + hv = 2 CO + H2             : {%TrGJ} jx(ip_GLYOXb){§}; {&2342}
// <J42008c>  GLYOX   + hv = HCHO + CO             : {%TrGJ} jx(ip_GLYOXc){§}; {&2342}
<J42009>  HCOCO2H     + hv = 2 HO2 + CO + CO2              : {%TrGJ} jx(ip_MGLYOX); {&2419}
<J42010>  HCOCO3H     + hv = HO2 + CO + OH + CO2           : {%TrGJ} jx(ip_CH3OOH)+jx(ip_HOCH2CHO); {&2419}
<J42011>  HYETHO2H    + hv = HOCH2CH2O + OH                : {%TrGJ} jx(ip_CH3OOH); {&2419}
<J42012>  ETHOHNO3    + hv = HO2 + 2 HCHO + NO2            : {%TrGJ} j_IC3H7NO3; {&2419}
<J42013>  HOOCH2CO3H  + hv = OH + HCHO + CO2 + OH          : {%TrGJ} 2.*jx(ip_CH3OOH); {&3264}
<J42014>  HOOCH2CO2H  + hv = OH + HCHO + HO2 + CO2         : {%TrG}  jx(ip_CH3OOH); {&3264}
<J42015>  CH2CO       + hv = .4 CO2 + .8 H + .34 CO + .34 OH + .34 HO2 + .16 HCHO + .16 O3P + .1 HCOOH + CO    : {%TrG} j_ketene*0.36; {&3264}
<J42016>  CH3CHOHOOH  + hv = CH3 + HCOOH + OH              : {%TrG}  jx(ip_CH3OOH); {&3264}
<J42017>  NO3CH2CHO   + hv = HO2 + CO + HCHO + NO2         : {%TrGJ} (jx(ip_C2H5NO3)+jx(ip_CH3CHO))*(jx(ip_NOA)+1E-10)/(0.59*j_IC3H7NO3+jx(ip_CH3COCH3)+1E-10); {&3264} // Enhancement of j according to \citet{3168}.
<J42018>  HOOCH2CHO   + hv = OH + HCHO + CO + HO2          : {%TrGJ} jx(ip_CH3OOH)+jx(ip_HOCH2CHO); {&3264}
<J42019>  C2H5NO3     + hv = CH3CHO + HO2 + NO2            : {%TrGJ} jx(ip_C2H5NO3); {&3264}
<J42020>  NO3CH2PAN   + hv = .7 NO3CH2CO3 + .7 NO2 + .3 HCHO + .3 NO2 + .3 CO2 + .3 NO3 : {%TrGJ} jx(ip_PAN); {&3264} // It is assumed that j(\kpp{NO3CH2PAN}) is the same as j(\kpp{PAN}).
<J42021>  C2H5O2NO2   + hv = .667 NO2 + .667 C2H5O2 + .333 NO3 + .333 CH3CHO + .333 HO2 : {%StTrGJ} jx(ip_CH3O2NO2); {&3264} // In analogy to what is assumed for \kpp{CH3O2NO2} photolysis as in \citep{2342}.
<J42022>  HOOCCOOH    + hv = CO2 + .72 HCOOH + .28 CO + .28 H2O : {%TrGJ} jx(ip_HOOCCOOH); {&3438}

// 3C (#J43nnn)
<J43000>  IC3H7OOH      + hv = CH3COCH3 + HO2 + OH         : {%TrGJ} jx(ip_CH3OOH); {&1612}
<J43001>  CH3COCH3      + hv = CH3CO + CH3                 : {%TrGJ} jx(ip_CH3COCH3); {&2342}
<J43002>  ACETOL        + hv = .5 CH3CO + .5 HCHO + .5 HO2 + .5 HOCH2CO + .5 CH3 : {%TrGJ} j_ACETOL; {&2342} // Following \citet{1584}, we use j(\kpp{ACETOL}) = \code{0.11*jx(ip_CHOH)}. As an additional factor, the quantum yield of 0.65 is taken from \citet{2510}.
<J43003>  MGLYOX        + hv = CH3CO + CO + HO2            : {%TrGJ} jx(ip_MGLYOX); {&2342}
<J43004>  HYPERACET     + hv = CH3CO + HCHO + OH           : {%TrGJ} jx(ip_CH3OOH)+j_ACETOL; {&2419}
<J43005>  HOCH2COCH2OOH + hv = HOCH2CO + HCHO + OH         : {%TrGJ} jx(ip_CH3OOH)+j_ACETOL; {&3264}
<J43006>  IC3H7NO3      + hv = CH3COCH3 + NO2 + HO2        : {%TrGJ} j_IC3H7NO3; {&1584} // Following \citet{1584}, we use J(\kpp{IC3H7NO3}) = \code{3.7*jx(ip_PAN)}.
<J43007>  NOA           + hv = CH3CO + HCHO + NO2          : {%TrGJ} jx(ip_NOA); {&3146}
<J43009>  HYPROPO2H     + hv = CH3CHO + HCHO + HO2 + OH    : {%TrGJ} jx(ip_CH3OOH); {&2419}
<J43010>  PR2O2HNO3     + hv = NOA + HO2 + OH              : {%TrGJ} jx(ip_CH3OOH); {&2419}
<J43011>  HOCH2COCHO    + hv = HOCH2CO + CO + HO2          : {%TrGJ} jx(ip_MGLYOX); {&2419}
<J43012>  ALCOCH2OOH    + hv = HCOCO + HCHO + OH           : {%TrGJ} jx(ip_CH3OOH)+j_ACETOL; {&3264}
<J43013>  ALCOCH2OOH    + hv = HOOCH2CO3 + CO + HO2        : {%TrGJ} jx(ip_MGLYOX); {&3264}
<J43014>  HCOCH2CHO     + hv = HCOCH2O2 + HO2 + CO         : {%TrGJTer} jx(ip_HOCH2CHO)*2.; {&2419}
<J43015>  HCOCH2CO2H    + hv = HCOCH2O2 + CO2 + HO2        : {%TrGJTer} jx(ip_HOCH2CHO); {&2419}
<J43016>  HOC2H4CO3H    + hv = HOCH2CH2O2 + CO2 + OH       : {%TrGJTer} jx(ip_CH3OOH); {&2419}
<J43017>  C33CO         + hv = HCOCO + HO2 + CO            : {%TrGJ} 2.*jx(ip_MGLYOX); {&3264}
<J43018>  CH3COCO2H     + hv = .32 CH3CHO + .16 CH2CHOH + .54 CO2 + .38 CH3CO + .38 HO2 + .38 CO2 + .07 CH3CO2H + .07 CO + .05 CH3CO + .05 CO + .05 OH : {%TrGJ} jx(ip_CH3COCO2H); {&3264} // One third of the acetaldehyde channel is considered to be CH2CHOH according to Hjorth (2002) EUPHORE Report.
<J43019>  CH3COCO3H     + hv = CH3CO + OH + CO2            : {%TrG} jx(ip_MGLYOX)+jx(ip_CH3OOH); {&3264}
<J43020>  CH3CHCO       + hv = C2H4 + CO                   : {%TrG} j_ketene*0.36*2.; {&3264}
<J43021>  PROPOLNO3     + hv = HOCH2CHO + HCHO + HO2 + NO2 : {%TrG} j_IC3H7NO3; {&3264}
<J43022>  CH3COCH2O2NO2 + hv = CH3CO + HCHO + NO3          : {%TrG} jx(ip_CH3O2NO2)+jx(ip_CH3COCH3); {&3264}
<J43023>  NC3H7OOH      + hv = C2H5CHO + HO2 + OH          : {%TrGJ} jx(ip_CH3OOH); {&1612}
<J43024>  NC3H7NO3      + hv = C2H5CHO + NO2 + HO2         : {%TrGJ} 0.59*j_IC3H7NO3; // Assuming J(\kpp{NC3H7NO3}) = 0.59 $\times$ J(\kpp{IC3H7NO3}), consistent with the photolysis rate coefficients used in the MCM \citep{2419}.
<J43025a> C2H5CHO       + hv = C2H5O2 + HO2 + CO           : {%TrGJ} jx(ip_C2H5CHO2HCO); // Photolysis frequencies very similar to the ones of \kpp{CH3CHO}.
<J43025b> C2H5CHO       + hv = PROPENOL                    : {%TrGJ} jx(ip_C2H5CHO2ENOL); {&3161, 3264} // Photolysis frequencies very similar to the ones of \kpp{CH3CHO}.
<J43026>  PPN           + hv = .7 C2H5CO3 + .7 NO2 + .3 C2H5O2 + .3 CO2 + .3 NO3   : {%TrGJ} jx(ip_PAN); {&2342}
<J43027>  PERPROACID    + hv = C2H5O2 + CO2 + OH           : {%TrGJ} jx(ip_CH3OOH); {&1612}
<J43028a> HCOCOCH2OOH   + hv = HOOCH2CO3 + CO + HO2        : {%TrGJ} jx(ip_MGLYOX); {&3264}
<J43028b> HCOCOCH2OOH   + hv = HCOCO + HCHO + OH           : {%TrGJ} jx(ip_HOCH2CHO)+jx(ip_CH3OOH); {&3264}
// terpene-related (J43200...J43399):
<J43200> HCOCH2CO3H     + hv = HCOCH2O2 + CO2 + OH         : {%TrGJTer} jx(ip_HOCH2CHO)+jx(ip_CH3OOH); {&2419}
// aromatics-related (J43400...J43599):
<J43400> C3DIALOOH      + hv = GLYOX + CO + HO2 + OH       : {%TrGJAro} jx(ip_HOCH2CHO)*2.+jx(ip_CH3OOH); {&2419} // KDEC C3DIALO $\rightarrow$ GLYOX + CO + HO2
<J43401> C32OH13CO      + hv = GLYOX + HO2 + HO2 + CO      : {%TrGJAro} jx(ip_HOCH2CHO)*2.; {&2419}
<J43402> HCOCOHCO3H     + hv = GLYOX + HO2 + CO2 + OH      : {%TrGJAro} jx(ip_CH3OOH); {&2419}

// 4C (#J44nnn)
<J44000a> LC4H9OOH    + hv = OH + C3H7CHO + HO2 : {%TrGJ} jx(ip_CH3OOH){§}*(k_p/(k_p+k_s)); {&2419, 3264}
<J44000b> LC4H9OOH    + hv = OH + .636 MEK + .636 HO2 + .364 CH3CHO + .364 C2H5O2 : {%TrGJ} jx(ip_CH3OOH){§}*(k_s/(k_p+k_s)); {&2419, 3264}
<J44001>  MVK         + hv = .5 C3H6 + .5 CH3CO + .5 HCHO + CO + .5 HO2 : {%TrGJ} jx(ip_MVK){§}; {&2342}
<J44002>  MEK         + hv = CH3CO + C2H5O2                : {%TrGJ} 0.42*jx(ip_CHOH){§}; {&1584}
<J44003>  LMEKOOH     + hv = .62 CH3CO + .62 CH3CHO + .38 HCHO + .38 CO2 + .38 HOCH2CH2O2 + OH : {%TrGJ} jx(ip_CH3OOH){§}+0.42*jx(ip_CHOH){§}; {&3264}
<J44004>  BIACET      + hv = 2 CH3CO                       : {%TrGJ} 2.15*jx(ip_MGLYOX){§}; // It is assumed that J(\kpp{BIACET}) is 2.15 times larger than J(\kpp{MGLYOX}), consistent with the photolysis rate coefficients used in the MCM \citep{2419}.
<J44005a> LC4H9NO3    + hv = NO2 + C3H7CHO + HO2           : {%TrGJ} j_IC3H7NO3*(k_p/(k_p+k_s)); // It is assumed that J(\kpp{LC4H9NO3}) is the same as J(\kpp{IC3H7NO3}).
<J44005b> LC4H9NO3    + hv = NO2 + MEK + HO2   : {%TrGJ} j_IC3H7NO3*(k_s/(k_p+k_s)); // It is assumed that J(\kpp{LC4H9NO3}) is the same as J(\kpp{IC3H7NO3}).
<J44006>  MPAN        + hv = .7 MACO3 + .7 NO2 + .3 MACO2 + .3 NO3                    : {%TrGJ} jx(ip_PAN); // It is assumed that J(\kpp{MPAN}) is the same as J(\kpp{PAN}).
<J44007a> CO2H3CO3H   + hv = MGLYOX + HO2 + OH   + CO2   : {%TrGJ} jx(ip_CH3OOH); {&2419}
<J44007b> CO2H3CO3H   + hv = CH3CO + HO2 + HCOCO3H : {%TrGJ} j_ACETOL; {&2419}
<J44008>  MACR        + hv = .5 MACO3 + .5 CH3CO + .5 HCHO + .5 CO + HO2   : {%TrGJ} jx(ip_MACR); {&2342}
<J44009>  MACROOH     + hv = MACRO + OH   : {%TrGJ} jx(ip_CH3OOH)+2.77*jx(ip_HOCH2CHO); {&3264} // It is assumed that J(\kpp{MACROOH}) is 2.77 times larger than J(\kpp{HOCH2CHO}), consistent with the photolysis rate coefficients used in the MCM \citep{2419}.
<J44010>  MACROH      + hv = ACETOL + CO + HO2 + HO2   : {%TrGJ} 2.77*jx(ip_HOCH2CHO); // It is assumed that J(\kpp{MACROH}) is 2.77 times larger than J(\kpp{HOCH2CHO}), consistent with the photolysis rate coefficients used in the MCM \citep{2419}.
<J44011>  MACO3H      + hv = MACO2 + OH                : {%TrGJ} jx(ip_CH3OOH); {&3264}
<J44012>  LHMVKABOOH  + hv = .12 MGLYOX + .12 HO2 + .88 CH3CO + .88 HOCH2CHO + .12 HCHO + OH   : {%TrGJ} jx(ip_CH3OOH)+j_ACETOL; {&3264}
<J44013>  CO2H3CHO    + hv = MGLYOX + CO + HO2 + HO2   : {%TrGJ} jx(ip_HOCH2CHO)+j_ACETOL; {&3264}
<J44014>  HO12CO3C4   + hv = CH3CO + HOCH2CHO + HO2 : {%TrGJ} j_ACETOL; {&2419}
<J44015>  BIACETOH    + hv = CH3CO + HOCH2CO        : {%TrGJ} 2.15*jx(ip_MGLYOX); // It is assumed that J(\kpp{BIACETOH}) is 2.15 times larger than J(\kpp{MGLYOX}), consistent with the photolysis rate coefficients used in the MCM \citep{2419}.
<J44016>  HCOCCH3CO   + hv = .5 OH + .5 CH3CHO + CO + .5 CH3CHCO + .5 CO    : {%TrG} j_ketene; {&3264}
<J44017a> CH3COCHCO   + hv = .0192 CH3COCO2H + .1848 H2O2 + .2208 MGLYOX + .36 OH + .36 CO + .56 CH3CO + .2 CH3CHO + .2 CO2 + .2 HCHO + .2 HO2 + CO   : {%TrG} j_ketene*0.5; {&3264,2419} // CO-channel yielding \chem{CH_3COCH} which upon reaction with \kpp{O2} produces an excited Criegee Intermediate assumed to be similar to MGLOOA in MCM. MGLOOA is produced also in other reactions and is substituted by its decomposition products. Furthermore, the stabilized Criegge Intermediate is assumed to solely react with water.
<J44017b> CH3COCHCO   + hv = CH3CHCO + CO                                                                                                          : {%TrG} j_ketene*0.5; {&3264}
<J44018a> CO23C3CHO   + hv = CH3CO + 2 CO + HO2           : {%TrGJ}    jx(ip_MGLYOX); {&3264}
<J44018b> CO23C3CHO   + hv = HCOCO + CH3CO                : {%TrGJ}    2.15*jx(ip_MGLYOX); {&3264}
<J44019>  CH3COCOCO2H + hv = CH3CO + CO + CO2 + HO2       : {%TrGJ}    3.15*jx(ip_MGLYOX); {&3264}
<J44020a> BIACETOOH   + hv = CH3CO + OH + HCHO + CO       : {%TrGJTer} jx(ip_CH3OOH)+j_ACETOL; {&2419}
<J44020b> BIACETOOH   + hv = CH3CO + HCOCO                : {%TrGJTer} 2.15*jx(ip_MGLYOX); {&2419}
<J44021>  C44OOH      + hv = HCOCH2CHO + CO2 + HO2 + OH   : {%TrGJTer} jx(ip_CH3OOH); {&2419}
<J44022>  C413COOOH   + hv = HCOCH2CO3 + HCHO + OH        : {%TrGJTer} jx(ip_CH3OOH)+jx(ip_HOCH2CHO)+j_ACETOL; {&2419}
<J44023a> C4CODIAL    + hv = CHOCOCH2O2 + HO2 + CO        : {%TrGJTer} jx(ip_HOCH2CHO); {&2419}
<J44023b> C4CODIAL    + hv = HCOCH2CO3 + HO2 + CO         : {%TrGJTer} jx(ip_MGLYOX); {&2419}
<J44024>  C312COCO3H  + hv = CHOCOCH2O2 + CO2 + OH        : {%TrGJTer} jx(ip_CH3OOH)+jx(ip_MGLYOX); {&2419}
<J44025>  LMEKNO3     + hv = .62 CH3CO + .62 CH3CHO + .38 HCHO + .38 CO2 + .38 HOCH2CH2O2 + NO2 : {%TrGJ} jx(ip_MEKNO3){§}; {&3146, 3264} // J values only for the secondary nitrate.
<J44026>  MVKNO3      + hv = CH3CO + HOCH2CHO + NO2       : {%TrGJ} jx(ip_MEKNO3){§}; {&3146, 3264} // Like for LMEKNO3 photolysis
<J44027>  MACRNO3     + hv = ACETOL + CO + HO2 + NO2      : {%TrGJ} (2.84*j_IC3H7NO3+jx(ip_CH3CHO))*(jx(ip_MEKNO3)+1E-10)/(j_IC3H7NO3+0.42*jx(ip_CHOH)+1E-10){§}; {&3168, 3264} //  2.84*J\_IC3H7NO3 like for other tertiary alkyl nitrates (see J4505). Enhancement of J according to \citet{3168}.
<J44028>  TC4H9NO3    + hv = CH3COCH3 + CH3 + NO2         : {%TrGJ} 2.84*j_IC3H7NO3; {&3264}
<J44029>  TC4H9OOH    + hv = CH3COCH3 + CH3 + OH          : {%TrGJ} jx(ip_CH3OOH); {&3264}
<J44030>  IBUTOLBNO3  + hv = CH3COCH3 + HCHO + HO2 + NO2  : {%TrGJ} 2.84*j_IC3H7NO3; {&3264}
<J44031>  IBUTOLBOOH  + hv = CH3COCH3 + HCHO + HO2 + OH   : {%TrGJ} jx(ip_CH3OOH); {&3264}
<J44032>  LBUT1ENOOH  + hv = C2H5CHO + HCHO + HO2 + OH    : {%TrGJ} jx(ip_CH3OOH); {&3264}
<J44033>  LBUT1ENNO3  + hv = C2H5CHO + HCHO + HO2 + NO2   : {%TrGJ} j_IC3H7NO3; {&3264}
<J44034>  BUT2OLOOH   + hv = 2 CH3CHO + HO2 + OH          : {%TrGJ} jx(ip_CH3OOH); {&3264}
<J44035>  BUT2OLNO3   + hv = 2 CH3CHO + HO2 + NO2         : {%TrGJ} j_IC3H7NO3; {&3264}
<J44036>  BUT2OLO     + hv = CH3CO + HOCH2CO              : {%TrGJ} j_ACETOL; {&3264}
<J44037a> C3H7CHO     + hv = NC3H7O2 + CO + HO2           : {%TrGJ} jx(ip_C3H7CHO2HCO); {&3264}
<J44037b> C3H7CHO     + hv = C2H4 + CH2CHOH               : {%TrGJ} jx(ip_C3H7CHO2VINY); {&3264} // Channel which produces just vinyl alcohol and not a larger enol via keto-enol photo-tautomerization.
<J44038>  IPRCHO      + hv = IC3H7O2 + CO + HO2           : {%TrGJ} jx(ip_IPRCHO2HCO); {&3264}
<J44039>  IC4H9NO3    + hv = IPRCHO + NO2                 : {%TrGJ} j_IC3H7NO3; {&3264}
<J44040>  IC4H9OOH    + hv = IPRCHO + HO2 + OH            : {%TrGJ} jx(ip_CH3OOH); {&3264}
<J44041>  PERIBUACID  + hv = IC3H7O2 + CO2 + OH           : {%TrGJ} jx(ip_CH3OOH); {&3264}
<J44042>  PIPN        + hv = .7 IPRCO3 + .7 NO2 + .3 IC3H7O2 + .3 CO2 + .3 NO3 : {%TrGJ} jx(ip_PAN); {&3264, 2342}
<J44043>  HVMK        + hv = MGLYOX + CO + 2 OH            : {%TrGJ} jx(ip_PeDIONE24); {&3264, 3184, 3185, 3186} // The resulting vinyl peroxy radical is assumed to mostly form with \kpp{HO2} a labile hydroperoxide (see ketene formation). The products are further simplified.
<J44044>  HMAC        + hv = HCOCCH3CO + 2 OH              : {%TrGJ} jx(ip_PeDIONE24); {&3264, 3184, 3185, 3186} // 1,5-H-shift for the resulting vinyl peroxy radical assumed to be dominant.
<J44045a> CO2C3CHO    + hv = CH3COCH2O2 + HO2 + CO         : {%TrGJ} jx(ip_C2H5CHO2HCO); {&2419}
<J44045b> CO2C3CHO    + hv = HVMK                          : {%TrGJ} jx(ip_C2H5CHO2ENOL); {&3161, 3264}
<J44046a> IBUTDIAL    + hv = CH3CHO + CO + HO2 + CO2 + H2O : {%TrGJ} jx(ip_C2H5CHO2HCO)*2.; // Simplified oxidation.
<J44046b> IBUTDIAL    + hv = HMAC                          : {%TrGJ} jx(ip_C2H5CHO2ENOL)*2.; {&3161, 3264}
// terpene-related (J44200...J44399):
<J44200>  IBUTALOH    + hv = CH3COCH3 + HO2 + HO2 + CO     : {%TrGJTer} j_ACETOL; {&2419}
<J44201>  IPRHOCO3H   + hv = CH3COCH3 + HO2 + CO2 + OH     : {%TrGJTer} jx(ip_CH3OOH); {&2419}
// aromatics-related (J44400...J44599):
<J44400a> MALDIALOOH  + hv = C32OH13CO + CO + OH + HO2                         : {%TrGJAro} jx(ip_HOCH2CHO)*2.; {&2419}
<J44400b> MALDIALOOH  + hv = GLYOX + GLYOX + HO2 + OH                          : {%TrGJAro} jx(ip_CH3OOH); {&2419} // KDEC MALDIALO $\rightarrow$ GLYOX + GLYOX + HO2
<J44401>  BZFUOOH     + hv = CO14O3CHO + HO2 + OH                              : {%TrGJAro} jx(ip_CH3OOH); {&2419} // KDEC BZFUO    $\rightarrow$ CO14O3CHO + HO2
<J44402>  HOCOC4DIAL  + hv = HCOCOHCO3 + HO2 + CO                              : {%TrGJAro} jx(ip_MGLYOX)+jx(ip_HOCH2CHO); {&2419}
<J44403>  NBZFUOOH    + hv = .5 CO14O3CHO + .5 NO2 + .5 NBZFUONE + .5 HO2 + OH : {%TrGJAro} jx(ip_CH3OOH); {&2419} // KDEC NBZFUO   $\rightarrow$ 0.5 CO14O3CHO + 0.5 NO2 + 0.5 NBZFUONE + 0.5 HO2
<J44404a> MALDALCO3H  + hv = HCOCO3H + HO2 + CO + HO2 + CO                     : {%TrGJAro} jx(ip_MACR); {&2419}
<J44404b> MALDALCO3H  + hv = .6 MALANHY + HO2 + .4 GLYOX + .4 CO + .4 CO2 + OH : {%TrGJAro} jx(ip_CH3OOH); {&2419} // KDEC MALDIALCO2 $\rightarrow$ 0.6 MALANHY + HO2 + 0.4 GLYOX + 0.4 CO
<J44405>  EPXDLCO2H   + hv = C3DIALO2 + CO2 + HO2                              : {%TrGJAro} 2.77*jx(ip_HOCH2CHO); {&2419}
<J44406>  MALDIAL     + hv = .4 BZFUONE + .6 MALDIALCO3 + .6 HO2               : {%TrGJAro} jx(ip_NO2)*0.14; {&2419}
<J44407>  MALANHYOOH  + hv = HCOCOHCO3 + CO2 + OH                              : {%TrGJAro} jx(ip_CH3OOH); {&2419} // KDEC MALANHYO $\rightarrow$ HCOCOHCO3
<J44408>  EPXDLCO3H   + hv = C3DIALO2 + OH + CO2                               : {%TrGJAro} jx(ip_CH3OOH)+2.77*jx(ip_HOCH2CHO); {&2419}
<J44409>  CO2C4DIAL   + hv = CO + CO + HO2 + HO2 + CO + CO                     : {%TrGJAro} jx(ip_MGLYOX)*2.; {&2419}
<J44410>  MALDALCO2H  + hv = HCOCO2H + HO2 + CO + HO2 + CO                     : {%TrGJAro} jx(ip_MACR); {&2419}
<J44411>  EPXC4DIAL   + hv = C3DIALO2 + CO + HO2                               : {%TrGJAro} 2.77*jx(ip_HOCH2CHO)*2.; {&2419}
<J44412>  CO14O3CHO   + hv = HO2 + CO + HCOCH2O2 + CO2                         : {%TrGJAro} jx(ip_MGLYOX); {&2419}
<J44414>  MECOACEOOH  + hv = CH3CO + HCHO + CO2 + OH                           : {%TrGJAro} jx(ip_CH3OOH); {&2419} // KDEC MECOACETO $\rightarrow$ CH3CO3 + HCHO

// 5C (#J45nnn)
<J45002>  LISOPACOOH  + hv = LISOPACO + OH      : {%TrGJ} jx(ip_CH3OOH); {&2419}
<J45003>  LISOPACNO3  + hv = LISOPACO + NO2   : {%TrGJ} 0.59*j_IC3H7NO3; // It is assumed that J(\kpp{LISOPACNO3}) = 0.59 $\times$ J(\kpp{IC3H7NO3}), consistent with the photolysis rate coefficients used in the MCM \citep{2419}.
<J45004>  ISOPBOOH    + hv = MVK + HCHO + HO2 + OH     : {%TrGJ} jx(ip_CH3OOH); {&2419}
<J45005>  ISOPBNO3    + hv = MVK + HCHO + HO2 + NO2  : {%TrGJ} 2.84*j_IC3H7NO3; // It is assumed that J(\kpp{ISOPBNO3}) = 2.84 $\times$ J(\kpp{IC3H7NO3}), consistent with the photolysis rate coefficients used in the MCM \citep{2419}.
<J45006>  ISOPDOOH    + hv = MACR + HCHO + HO2 + OH                                                : {%TrGJ} jx(ip_CH3OOH); {&2419}
<J45007>  ISOPDNO3    + hv = MACR + HCHO + HO2 + NO2                                               : {%TrGJ} j_IC3H7NO3; // It is assumed that J(\kpp{ISOPDNO3}) is the same as J(\kpp{IC3H7NO3}).
<J45008>  NISOPOOH    + hv = NC4CHO + HO2 + OH                                                     : {%TrGJ} jx(ip_CH3OOH); {&2419}
<J45009>  NC4CHO      + hv = LHC4ACCO3 + NO2                                                       : {%TrGJ} (.59*j_IC3H7NO3+jx(ip_MACR){§})*(jx(ip_MEKNO3)+1E-10)/(j_IC3H7NO3+0.42*jx(ip_CHOH){§}+1E-10); {&3168, 3264} //  0.59*J\_IC3H7NO3 like for other primary alkyl nitrates (see J4503). Enhancement of J according to \citet{3168}.
<J45010>  LNISOOH     + hv = NOA + OH + .5 HOCHCHO + .5 CO + .5 HO2 + .5 CO2                       : {%TrGJ} jx(ip_CH3OOH); {&2272, 3264}
<J45011>  LHC4ACCHO   + hv = .5 LHC4ACCO3 + .5 HO2 + .5 CO + .5 OH + .25 MACRO2 + .25 LHMVKABO2    : {%TrGJ} jx(ip_MACR); {&3264}
<J45012>  LC578OOH    + hv = .25 ACETOL + .75 MGLYOX + .25 HOCHCHO + .75 HOCH2CHO + .75 HO2 + OH   : {%TrGJ} jx(ip_CH3OOH)+ 2.77*jx(ip_HOCH2CHO); {&3264}
<J45013>  LHC4ACCO3H  + hv = OH + .5 MACRO2 + .5 LHMVKABO2 + OH  + CO2                             : {%TrGJ} j_HPALD; {&3264}
<J45014>  LC5PAN1719  + hv = .7 LHC4ACCO3  + .7 NO2 + .15 MACRO2 + .15 LHMVKABO2 + .3 CO2 + .3 NO3 : {%TrGJ} jx(ip_PAN); {&3264}
<J45015>  HCOC5       + hv = .65 CH3 + .65 CO + .65 HCHO + .35 OH + .35 CH3COCH2O2 + HOCH2CO : {%TrGJ} 0.5*jx(ip_MVK); {&3264} // Consistent with the MCM \citep{2419}, we assume that J(\kpp{HCOC5}) is half as large as J(\kpp{MVK}). With exeption of \kpp{HOCH2CO} the products of \kpp{MACO2} decomposition without \kpp{CO2}.
<J45016>  C59OOH      + hv = ACETOL + HOCH2CO + OH             : {%TrGJ}    j_ACETOL+jx(ip_CH3OOH); {&3264}
<J45017>  C511OOH     + hv = CH3CO + HCOCH2CHO + OH            : {%TrGJTer} jx(ip_CH3OOH)+jx(ip_HOCH2CHO); {&2419}
<J45018a> CO23C4CHO   + hv = BIACETO2 + HO2 + CO               : {%TrGJTer} jx(ip_HOCH2CHO); {&2419}
<J45018b> CO23C4CHO   + hv = CH3CO + HCOCH2CO3                 : {%TrGJTer} 2.15*jx(ip_MGLYOX); {&2419}
<J45019>  CO23C4CO3H  + hv = BIACETO2 + CO2 + OH               : {%TrGJTer} jx(ip_CH3OOH)+jx(ip_HOCH2CHO); {&2419}
<J45020>  C512OOH     + hv = C513O2 + OH                       : {%TrGJTer} jx(ip_CH3OOH)+jx(ip_HOCH2CHO); {&2419}
<J45021>  CO13C4CHO   + hv = CHOC3COO2 + CO + HO2              : {%TrGJTer} jx(ip_HOCH2CHO)*2.; {&2419}
<J45022>  C513OOH     + hv = GLYOX + HOC2H4CO3 + OH            : {%TrGJTer} jx(ip_CH3OOH)+jx(ip_HOCH2CHO); {&2419}
<J45023>  C513CO      + hv = HOC2H4CO3 + HO2 + CO + CO         : {%TrGJTer} jx(ip_MGLYOX)+2.15*jx(ip_MGLYOX); {&2419}
<J45024>  C514OOH     + hv = CO13C4CHO + HO2 + OH              : {%TrGJTer} jx(ip_CH3OOH)+jx(ip_HOCH2CHO)*2.; {&2419}
<J45025>  C514NO3     + hv = CO13C4CHO + HO2 + NO2             : {%TrGJTer} j_IC3H7NO3+jx(ip_HOCH2CHO)*2.; {&2419}
<J45026a> LZCODC23DBCOOH + hv = OH + CO + HVMK + OH            : {%TrGJ} j_HPALD*0.6*0.5; {&3264, 3182, 3183}
<J45026b> LZCODC23DBCOOH + hv = OH + CO + CH3CO + HOCH2CHO     : {%TrGJ} j_HPALD*0.6*0.5; {&3264, 3182, 3183}
<J45026c> LZCODC23DBCOOH + hv = OH + CO + HMAC + OH            : {%TrGJ} j_HPALD*0.4*0.5; {&3264, 3182, 3183}
<J45026d> LZCODC23DBCOOH + hv = OH + CO + CO + ACETOL + HO2    : {%TrGJ} j_HPALD*0.4*0.5; {&3264, 3182, 3183}
<J45027>  LZCO3HC23DBCOD + hv = .62 EZCH3CO2CHCHO + .38 EZCHOCCH3CHO2 + OH + CO2              : {%TrGJ} j_HPALD; {&3264}
<J45028a> C1OOHC2OOHC4OD + hv = HYPERACET + OH + 2 CO + HO2                                   : {%TrGJ} 2.77*jx(ip_HOCH2CHO); {&3264}
<J45028b> C1OOHC2OOHC4OD + hv = .5 HYPERACET + .5 HOCHCHO + .5 CO2H3CHO + .5 HCHO + 1.5 OH    : {%TrGJ} 2.*jx(ip_CH3OOH); {&3264}
<J45029>  DB1OOH         + hv = DB1O + OH                                                     : {%TrG} jx(ip_CH3OOH); {&3264}
<J45030>  DB2OOH         + hv = .48 ACETOL + .52 HOCH2CHO + .52 MGLYOX + .48 GLYOX + HO2 + OH : {%TrG} jx(ip_CH3OOH); {&3264}
<J45031a> C1ODC2OOHC4OD  + hv = MGLYOX + HOCHCHO + OH                                         : {%TrGJ} jx(ip_CH3OOH); {&3264}
<J45031b> C1ODC2OOHC4OD  + hv = CO2H3CHO + CO + HO2 + OH                                      : {%TrGJ} 2.*2.77*jx(ip_HOCH2CHO); {&3264}
<J45032>  C4MDIAL        + hv = .5 CH3COCHCO + .5 HCOCCH3CO + CO + HO2 + OH                   : {%TrGJ} jx(ip_NO2)*0.1*0.5; {&3264} //{approximation with 4-oxo-pentenal photolysis combining results of Thüner et al(2004) and Xiang et al(2007)}
<J45033>  DB1NO3         + hv = DB1O + NO2                     : {%TrG} j_IC3H7NO3; {&3264}
<J45034>  CHOC3COOOH     + hv = CHOC3COO2 + CO2 + OH           : {%TrGJTer} jx(ip_CH3OOH)+jx(ip_HOCH2CHO)+j_ACETOL; {&2419}
// terpene-related (J45200...J45399):
<J45200a> LMBOABOOH   + hv = HOCH2CHO + CH3COCH3 + HO2 + OH    : {%TrGJTer} jx(ip_CH3OOH)*.67; {&2419, 3264}
<J45200b> LMBOABOOH   + hv = IBUTALOH + HCHO + HO2 + OH        : {%TrGJTer} jx(ip_CH3OOH)*.33; {&2419, 3264}
<J45201>  MBOACO      + hv = HCHO + HO2 + IPRHOCO3             : {%TrGJTer} j_ACETOL; {&2419}
<J45202>  MBOCOCO     + hv = CO + HO2 + IPRHOCO3               : {%TrGJTer} jx(ip_MGLYOX); {&2419}
<J45203a> LNMBOABOOH  + hv = NO3CH2CHO + CH3COCH3 + HO2 + OH   : {%TrGJTer} jx(ip_CH3OOH)*.65; {&2419, 3264}
<J45203b> LNMBOABOOH  + hv = IBUTALOH + HCHO + NO2 + OH        : {%TrGJTer} jx(ip_CH3OOH)*.35; {&2419, 3264}
<J45204>  NC4OHCO3H   + hv = IBUTALOH + CO2 + NO2 + OH         : {%TrGJTer} jx(ip_CH3OOH); {&2419}
// aromatics-related (J45400...J45599):
<J45400>  C54CO       + hv = HO2 + CO + CO + CO + CH3CO        : {%TrGJAro} jx(ip_MGLYOX)+2.15*jx(ip_MGLYOX)*2.; {&2419}
<J45401>  C5134CO2OH  + hv = CO23C3CHO + HO2 + CO + HO2        : {%TrGJAro} jx(ip_HOCH2CHO)+2.15*jx(ip_MGLYOX); {&2419}
<J45402>  C5DIALOOH   + hv = MALDIAL + CO + HO2 + OH           : {%TrGJAro} jx(ip_CH3OOH)+jx(ip_MACR); {&2419} // KDEC C5DIALO $\rightarrow$ MALDIAL + CO + HO2
<J45406>  C5CO14OH    + hv = CH3CO + HCOCO2H + HO2 + CO        : {%TrGJAro} jx(ip_MVK); {&2419}
<J45407>  C5DICARB    + hv = .6 C5CO14O2 + .6 HO2 + .4 TLFUONE : {%TrGJAro} jx(ip_NO2)*0.2; {&2419} // KDEC TLFUONE $\rightarrow$ 0.6 C5CO14O2 + 0.6 HO2 + 0.4 TLFUONE
<J45408>  MC3ODBCO2H  + hv = CH3COCO2H + HO2 + CO + HO2 + CO   : {%TrGJAro} jx(ip_MACR); {&2419}
<J45409>  ACCOMECHO   + hv = MECOACETO2 + HO2 + CO             : {%TrGJAro} jx(ip_HOCH2CHO); {&2419}
<J45410>  MMALNHYOOH  + hv = CO2H3CO3 + CO2 + OH               : {%TrGJAro} jx(ip_CH3OOH); {&2419} // KDEC MMALANHYO $\rightarrow$ CO2H3CO3
<J45411>  C5DICAROOH  + hv = MGLYOX + GLYOX + HO2 + OH         : {%TrGJAro} jx(ip_CH3OOH)+jx(ip_HOCH2CHO)+j_ACETOL; {&2419} // KDEC C5DICARBO $\rightarrow$ MGLYOX + GLYOX + HO2
<J45412>  NTLFUOOH    + hv = ACCOMECHO + NO2 + OH              : {%TrGJAro} jx(ip_CH3OOH); {&2419} // KDEC NTLFUO    $\rightarrow$ ACCOMECHO + NO2
<J45414>  C5CO14OOH   + hv = .83 MALANHY + .83 CH3 + .17 MGLYOX + .17 HO2 + .17 CO + .17 CO2 + OH : {%TrGJAro} jx(ip_CH3OOH); {&2419} // KDEC C5CO14CO2  $\rightarrow$ 0.83 MALANHY + 0.83 CH3 + .17 MGLYOX + .17 HO2 + .17 CO + .17 CO2
<J45415>  TLFUOOH     + hv = ACCOMECHO + HO2 + OH              : {%TrGJAro} jx(ip_CH3OOH); {&2419} // KDEC TLFUO $\rightarrow$ ACCOMECHO + HO2
<J45417>  ACCOMECO3H  + hv = MECOACETO2 + CO2 + OH             : {%TrGJAro} jx(ip_CH3OOH); {&2419}
<J45418>  C5DIALCO    + hv = MALDIALCO3 + CO + HO2             : {%TrGJAro} jx(ip_MGLYOX)+jx(ip_MACR); {&2419}

// 6C (#J46nnn)
// terpene-related (J46200...J46399):
<J46200>  C614NO3     + hv = CO23C4CHO + HCHO + HO2 + NO2      : {%TrGJTer} 2.15*jx(ip_MGLYOX){§}; {&2419}
<J46201>  C614OOH     + hv = CO23C4CHO + HCHO + HO2 + OH       : {%TrGJTer} jx(ip_CH3OOH){§}+2.15*jx(ip_MGLYOX){§}; {&2419}
<J46202>  CO235C5CHO  + hv = CO23C4CO3 + CO + HO2              : {%TrGJTer} jx(ip_MGLYOX){§}; {&2419}
<J46203>  CO235C6OOH  + hv = CO23C4CO3 + HCHO + OH             : {%TrGJTer} jx(ip_CH3OOH){§}+2.15*jx(ip_MGLYOX){§}; {&2419}
// aromatics-related (J46400...J46599):
<J46400>  PHENOOH     + hv = .71 MALDALCO2H + .71 GLYOX + .29 PBZQONE + HO2 + OH : {%TrGJAro} jx(ip_CH3OOH); {&2419} // KDEC PHENO $\rightarrow$ 0.71 MALDALCO2H + 0.71 GLYOX + 0.29 PBZQONE + HO2
<J46401>  C6CO4DB     + hv = C4CO2DBCO3 + HO2 + CO             : {%TrGJAro} jx(ip_MGLYOX)*2.; {&2419}
<J46402>  C5CO2DCO3H  + hv = CH3CO + C33CO + CO2 + OH          : {%TrGJAro} jx(ip_CH3OOH)+jx(ip_MGLYOX); {&2419}
<J46403>  NDNPHENOOH  + hv = NC4DCO2H + HNO3 + CO + CO + NO2 + OH        : {%TrGJAro} jx(ip_CH3OOH); {&2419} // KDEC NDNPHENO $\rightarrow$ NC4DCO2H + HNO3 + CO + CO + NO2
<J46404>  BZBIPERNO3  + hv = GLYOX + HO2 + .5 BZFUONE + .5 BZFUONE + NO2 : {%TrGJAro} j_IC3H7NO3; {&2419} // KDEC BZBIPERO $\rightarrow$ GLYOX + HO2 + 0.5 BZFUONE + 0.5 BZFUONE
<J46405>  HOC6H4NO2   + hv = HONO + CPDKETENE                  : {%TrGJAro} jx(ip_HOC6H4NO2); {&3203} //new channel created for nitrophenol decomposition
<J46406>  CPDKETENE   + hv = CO2 + CO + 2 HO2 + MALDIAL        : {%TrGJAro} j_ketene; //new channel created for nitrophenol decomposition
<J46407>  C5COOHCO3H  + hv = HOCOC4DIAL + HO2 + CO + CO2 + OH  : {%TrGJAro} jx(ip_CH3OOH); {&2419}
<J46408>  BZEPOXMUC   + hv = .5 C5DIALO2 + 1.5 HO2 + 1.5 CO + .5 MALDIAL : {%TrGJAro} 4.E3*jx(ip_MVK)*0.1; {&2419}
<J46409>  NPHEN1OOH   + hv = NPHEN1O + OH                      : {%TrGJAro} jx(ip_CH3OOH); {&2419}
<J46410>  BZEMUCCO    + hv = HCOCOHCO3 + C3DIALO2              : {%TrGJAro} jx(ip_HOCH2CHO)*2.+j_ACETOL; {&2419}
<J46411>  BZEMUCCO2H  + hv = C5DIALO2 + CO2 + HO2              : {%TrGJAro} jx(ip_MACR); {&2419}
<J46412>  NNCATECOOH  + hv = NC4DCO2H + HCOCO2H + NO2 + OH     : {%TrGJAro} jx(ip_CH3OOH); {&2419} // KDEC NNCATECO $\rightarrow$ NC4DCO2H + HCOCO2H + NO2
<J46413>  C615CO2OOH  + hv = C5DICARB + CO + HO2 + OH          : {%TrGJAro} jx(ip_MVK)+jx(ip_CH3OOH); {&2419}
<J46414>  NPHENOOH    + hv = MALDALCO2H + GLYOX + OH + NO2     : {%TrGJAro} j_IC3H7NO3 + jx(ip_CH3OOH); {&2419}
<J46415>  NCATECOOH   + hv = NC4DCO2H + HCOCO2H + HO2 + OH     : {%TrGJAro} jx(ip_CH3OOH); {&2419} // KDEC NCATECO $\rightarrow$ NC4DCO2H + HCOCO2H + HO2
<J46416>  PBZQOOH     + hv = C5CO2OHCO3 + OH                   : {%TrGJAro} jx(ip_CH3OOH); {&2419} // KDEC PBZQO $\rightarrow$ C5CO2OHCO3
<J46417>  BZOBIPEROH  + hv = MALDIALCO3 + GLYOX + HO2          : {%TrGJAro} j_ACETOL; {&2419}
<J46418>  BZBIPEROOH  + hv = GLYOX + HO2 + .5 BZFUONE + .5 BZFUONE + OH : {%TrGJAro} jx(ip_CH3OOH); {&2419} // KDEC BZBIPERO $\rightarrow$ GLYOX + HO2 + 0.5 BZFUONE + 0.5 BZFUONE
<J46419>  NBZQOOH     + hv = C6CO4DB + NO2 + OH                : {%TrGJAro} jx(ip_CH3OOH); {&2419} // KDEC NBZQO $\rightarrow$ C6CO4DB + NO2
<J46420>  CATEC1OOH   + hv = CATEC1O + OH                      : {%TrGJAro} jx(ip_CH3OOH); {&2419}
<J46421>  C6125CO     + hv = C5CO14O2 + CO + HO2               : {%TrGJAro} jx(ip_MGLYOX)+jx(ip_MVK); {&2419}
<J46422>  DNPHENOOH   + hv = NC4DCO2H + HCOCO2H + NO2 + OH     : {%TrGJAro} jx(ip_CH3OOH); {&2419} // KDEC DNPHENO $\rightarrow$ NC4DCO2H + HCOCO2H + NO2
<J46423>  BZEMUCCO3H  + hv = C5DIALO2 + CO2 + OH               : {%TrGJAro} jx(ip_CH3OOH)+jx(ip_MACR); {&2419}
<J46424>  C6H5OOH     + hv = C6H5O + OH                        : {%TrGJAro} jx(ip_CH3OOH); {&2419}
<J46425>  BZEMUCOOH   + hv = .5 EPXC4DIAL + .5 GLYOX + .5 HO2 + .5 C3DIALO2 + .5 C32OH13CO + OH : {%TrGJAro} jx(ip_CH3OOH)+jx(ip_HOCH2CHO)*2.; {&2419} // KDEC BZEMUCO $\rightarrow$ 0.5 EPXC4DIAL + .5 GLYOX + .5 HO2 + .5 C3DIALO2 + .5 C32OH13CO
<J46427>  BZEMUCNO3   + hv = EPXC4DIAL + NO2 + GLYOX + HO2     : {%TrGJAro} 2.77*jx(ip_HOCH2CHO); {&2419}
<J46428>  DNPHEN      + hv = HONO + NCPDKETENE                 : {%TrGJAro} jx(ip_HOC6H4NO2); {&3264}
<J46429>  NCPDKETENE  + hv = CO2 + CO + 2 HO2 + NC4DCO2H       : {%TrGJAro} j_ketene; //new channel

// 7C (#J47nnn)
// terpene-related (J47200...J47399):
<J47200>  CO235C6CHO  + hv = CHOC3COCO3 + CH3CO          : {%TrGJTer} 2.15*jx(ip_MGLYOX){§}; {&2419}
<J47201>  C235C6CO3H  + hv = CO235C6O2 + CO2 + OH        : {%TrGJTer} jx(ip_CH3OOH){§}+2.15*jx(ip_MGLYOX){§}; {&2419}
<J47202>  C716OOH     + hv = CO13C4CHO + CH3CO + OH      : {%TrGJTer} jx(ip_CH3OOH){§}+jx(ip_HOCH2CHO){§}; {&2419}
<J47203>  C721OOH     + hv = C722O2 + OH                 : {%TrGJTer} jx(ip_CH3OOH){§}; {&2419}
<J47204>  C722OOH     + hv = CH3COCH3 + C44O2 + OH       : {%TrGJTer} jx(ip_CH3OOH){§}; {&2419}
// aromatics-related (J47400...J47599):
<J47400>  TLEPOXMUC   + hv = .5 C615CO2O2 + HO2 + CO + .5 EPXC4DIAL + .5 CH3CO : {%TrGJAro} 4.E3*jx(ip_MVK)*0.1; {&2419}
<J47401>  C6H5CH2OOH  + hv = BENZAL + HO2 + OH                        : {%TrGJAro} jx(ip_CH3OOH); {&2419} // KROPRIM*O2 fast reaction C6H5CH2O = BENZAL + HO2
<J47402>  C6H5CH2NO3  + hv = BENZAL + HO2 + NO2                       : {%TrGJAro} 0.59*j_IC3H7NO3; {&2419} // KROPRIM*O2 fast reaction C6H5CH2O = BENZAL + HO2
<J47403>  BENZAL      + hv = HO2 + CO + C6H5O2                        : {%TrGJAro} jx(ip_BENZAL); {&1745}
<J47404>  TLBIPEROOH  + hv = .6 GLYOX + .4 MGLYOX + HO2 + .2 C4MDIAL + .2 C5DICARB + .2 TLFUONE + .2 BZFUONE + .2 MALDIAL + OH  : {%TrGJAro} jx(ip_CH3OOH); {&2419} // KDEC TLBIPERO $\rightarrow$ 0.6 GLYOX + 0.4 MGLYOX + HO2 + 0.2 C4MDIAL + 0.2 C5DICARB + 0.2 TLFUONE + 0.2 BZFUONE + 0.2 MALDIAL
<J47405>  TLBIPERNO3  + hv = .6 GLYOX + .4 MGLYOX + HO2 + .2 C4MDIAL + .2 C5DICARB + .2 TLFUONE + .2 BZFUONE + .2 MALDIAL + NO2 : {%TrGJAro} j_IC3H7NO3; {&2419} // KDEC TLBIPERO $\rightarrow$ 0.6 GLYOX + 0.4 MGLYOX + HO2 + 0.2 C4MDIAL + 0.2 C5DICARB + 0.2 TLFUONE + 0.2 BZFUONE + 0.2 MALDIAL
<J47406>  TLOBIPEROH  + hv = C5CO14O2 + GLYOX + HO2                   : {%TrGJAro} j_ACETOL; {&2419}
<J47407>  CRESOOH     + hv = .68 C5CO14OH + .68 GLYOX + HO2 + .32 PTLQONE + OH  : {%TrGJAro} jx(ip_CH3OOH); {&2419} // KDEC CRESO $\rightarrow$ 0.68 C5CO14OH + 0.68 GLYOX + HO2 + 0.32 PTLQONE
<J47408a> NCRESOOH    + hv = .68 C5CO14OH + .68 GLYOX + HO2 + .32 PTLQONE + OH + NO2 : {%TrGJAro} j_IC3H7NO3; {&2419} // KDEC CRESO $\rightarrow$ 0.68 C5CO14OH + 0.68 GLYOX + HO2 + 0.32 PTLQONE
<J47408b> NCRESOOH    + hv = C5CO14OH + GLYOX + NO2  + OH             : {%TrGJAro} jx(ip_CH3OOH); {&2419} // KDEC NCRESO $\rightarrow$ C5CO14OH + GLYOX + NO2
<J47409>  TOL1OHNO2   + hv = HONO + MCPDKETENE                        : {%TrGJAro} jx(ip_HOPh3Me2NO2); // Using J for 3-methyl-2-nitrophenol.
<J47410>  TLEMUCCO2H  + hv = C615CO2O2 + CO2 + HO2                    : {%TrGJAro} jx(ip_MACR); {&2419}
<J47411>  TLEMUCCO3H  + hv = C615CO2O2 + CO2 + OH                     : {%TrGJAro} jx(ip_CH3OOH)+jx(ip_MACR); {&2419}
<J47412>  TLEMUCOOH   + hv = .5 C3DIALO2 + .5 CO2H3CHO + .5 EPXC4DIAL + .5 MGLYOX + .5 HO2 + OH : {%TrGJAro} jx(ip_CH3OOH)+2.77*jx(ip_HOCH2CHO)+j_ACETOL; {&2419} // KDEC TLEMUCO $\rightarrow$ 0.5 C3DIALO2 + 0.5 CO2H3CHO + 0.5 EPXC4DIAL + 0.5 MGLYOX + 0.5 HO2
<J47413>  TLEMUCNO3   + hv = EPXC4DIAL + NO2 + CH3CO + CO + HO2       : {%TrGJAro} 2.77*jx(ip_HOCH2CHO)+j_ACETOL; {&2419}
<J47414>  TLEMUCCO    + hv = CH3CO + EPXC4DIAL + CO + HO2             : {%TrGJAro} 2.77*jx(ip_HOCH2CHO)+2.15*jx(ip_MGLYOX); {&2419}
<J47415>  C6H5CO3H    + hv = C6H5O2 + CO2 + OH                        : {%TrGJAro} jx(ip_CH3OOH); {&2419}
<J47416>  OXYL1OOH    + hv = TOL1O + OH                               : {%TrGJAro} jx(ip_CH3OOH); {&2419}
<J47417>  MNCATECH    + hv = HONO + MCPDKETENE                        : {%TrGJAro} jx(ip_HOPh3Me2NO2); // Using J for 3-methyl-2-nitrophenol.
<J47418>  MCPDKETENE  + hv = CO2 + CO + 2 HO2 + C4MDIAL               : {%TrGJAro} j_ketene; //new channel
<J47419>  DNCRES      + hv = HONO + MNCPDKETENE                       : {%TrGJAro} jx(ip_HOPh3Me2NO2); // Using J for 3-methyl-2-nitrophenol.
<J47420>  MNCPDKETENE + hv = CO2 + CO + 2 HO2 + NC4MDCO2H             : {%TrGJAro} j_ketene; //new channel
<J47421>  MCATEC1OOH  + hv = MCATEC1O + OH                            : {%TrGJAro} jx(ip_CH3OOH); {&2419}
<J47422>  NPTLQOOH    + hv = C7CO4DB + NO2 + OH                       : {%TrGJAro} jx(ip_CH3OOH); {&2419} // KDEC NPTLQO $\rightarrow$ C7CO4DB + NO2
<J47423>  PTLQOOH     + hv = C6CO2OHCO3 + OH                          : {%TrGJAro} jx(ip_CH3OOH); {&2419} // KDEC PTLQO $\rightarrow$ C6CO2OHCO3
<J47424>  NCRES1OOH   + hv = NCRES1O + OH                             : {%TrGJAro} jx(ip_CH3OOH); {&2419}
<J47425>  MNNCATCOOH  + hv = NC4MDCO2H + HCOCO2H + NO2 + OH           : {%TrGJAro} jx(ip_CH3OOH); {&2419} // KDEC MNNCATECO $\rightarrow$ NC4MDCO2H + HCOCO2H + NO2
<J47426>  MNCATECOOH  + hv = NC4MDCO2H + HCOCO2H + HO2 + OH           : {%TrGJAro} jx(ip_CH3OOH); {&2419} // KDEC MNCATECO $\rightarrow$ NC4MDCO2H + HCOCO2H + HO2
<J47427>  C7CO4DB     + hv = C5CO2DBCO3 + HO2 + CO                    : {%TrGJAro} jx(ip_MGLYOX)*2.; {&2419}
<J47428>  NDNCRESOOH  + hv = NC4MDCO2H + HNO3 + CO + CO + NO2 + OH    : {%TrGJAro} jx(ip_CH3OOH); {&2419} // KDEC NDNCRESO $\rightarrow$ NC4MDCO2H + HNO3 + CO + CO + NO2
<J47429>  DNCRESOOH   + hv = NC4MDCO2H + HCOCO2H + NO2 + OH           : {%TrGJAro} jx(ip_CH3OOH); {&2419} // KDEC DNCRESO $\rightarrow$ NC4MDCO2H + HCOCO2H + NO2
<J47430>  C6COOHCO3H  + hv = C5134CO2OH + HO2 + CO + CO2 + OH         : {%TrGJAro} jx(ip_CH3OOH); {&2419}

// 8C (#J48nnn)
// terpene-related (J48200...J48399):
<J48200>  C86OOH      + hv = C511O2 + CH3COCH3 + OH        : {%TrGJTer} jx(ip_CH3OOH){§}+ jx(ip_HOCH2CHO){§}; {&2419}
<J48201>  C812OOH     + hv = C813O2 + OH                   : {%TrGJTer} jx(ip_CH3OOH){§}; {&2419}
<J48202>  C813OOH     + hv = CH3COCH3 + C512O2 + OH        : {%TrGJTer} jx(ip_CH3OOH){§}+jx(ip_MGLYOX){§}; {&2419}
<J48203>  C721CHO     + hv = C721O2 + CO + HO2             : {%TrGJTer} jx(ip_HOCH2CHO){§}; {&2419}
<J48204>  C721CO3H    + hv = C721O2 + CO2 + OH             : {%TrGJTer} jx(ip_CH3OOH){§}; {&2419}
<J48205>  C8BCOOH     + hv = C89O2 + OH                    : {%TrGJTer} jx(ip_CH3OOH){§}; {&2419}
<J48206>  C89OOH      + hv = C810O2 + OH                   : {%TrGJTer} jx(ip_CH3OOH){§}+jx(ip_HOCH2CHO){§}; {&2419}
<J48207>  C89NO3      + hv = C810O2 + NO2                  : {%TrGJTer} jx(ip_CH3OOH){§}+jx(ip_HOCH2CHO){§}; {&2419}
<J48208>  C810OOH     + hv = CH3COCH3 + C514O2 + OH        : {%TrGJTer} jx(ip_CH3OOH){§}+jx(ip_HOCH2CHO){§}; {&2419}
<J48209>  C810NO3     + hv = CH3COCH3 + C514O2 + NO2       : {%TrGJTer} 2.84*j_IC3H7NO3+jx(ip_HOCH2CHO){§}; {&2419}
<J48210>  C8BCNO3     + hv = C89O2 + NO2                   : {%TrGJTer} j_IC3H7NO3; {&2419}
<J48211>  C85OOH      + hv = C86O2 + OH                    : {%TrGJTer} jx(ip_CH3OOH){§}+j_ACETOL; {&2419}
// aromatics-related (J48400...J48599):
<J48400>  STYRENOOH   + hv = HO2 + HCHO + BENZAL + OH      : {%TrGJAro} jx(ip_CH3OOH); {&2419} // KDEC STYRENO $\rightarrow$ HO2 + HCHO + BENZAL

// 9C (#J49nnn)
// terpene-related (J49200...J49399):
<J49200>  C96OOH      + hv = C97O2 + OH                    : {%TrGJTer} jx(ip_CH3OOH){§}+j_ACETOL; {&2419}
<J49201>  C97OOH      + hv = C98O2 + OH                    : {%TrGJTer} jx(ip_CH3OOH){§}+j_ACETOL; {&2419}
<J49202>  C98OOH      + hv = C614O2 + CH3COCH3 + OH        : {%TrGJTer} (jx(ip_CH3OOH)+2.15*jx(ip_MGLYOX)){§}; {&2419}
<J49203a> NORPINAL    + hv = C85O2 + CO + HO2              : {%TrGJTer} jx(ip_PINAL2HCO){§}; {&2419, 3264}
<J49203b> NORPINAL    + hv = NORPINENOL                    : {%TrGJTer} jx(ip_PINAL2ENOL){§}; {&3264, 3161}
<J49204>  C85CO3H     + hv = C85O2 + CO2 + OH              : {%TrGJTer} jx(ip_CH3OOH){§}+j_ACETOL; {&2419}
<J49205>  C89CO2H     + hv = .8 C811CO3 + .2 C89O2 + .2 CO2 + HO2 : {%TrGJTer} jx(ip_HOCH2CHO){§}; {&2419}
<J49206>  C89CO3H     + hv = .8 C811CO3 + .2 C89O2 + .2 CO2 + OH  : {%TrGJTer} jx(ip_CH3OOH){§}+jx(ip_HOCH2CHO){§}; {&2419}
<J49207>  C811CO3H    + hv = C811O2 + CO2 + OH             : {%TrGJTer} jx(ip_CH3OOH){§}; {&2419}
<J49208>  NOPINDOOH   + hv = C89CO3 + OH                   : {%TrGJTer} jx(ip_CH3OOH){§}; {&2419}

// 10C (#J40nnn)
// terpene-related (J40200...J40399):
<J40200>  LAPINABOOH     + hv = PINAL + HO2 + OH             : {%TrGJTer} jx(ip_CH3OOH){§}; {&2419}
<J40201>  MENTHEN6ONE    + hv = RO6R1O2 + OH                 : {%TrGJTer} jx(ip_CH3OOH){§}; {&3017}
<J40202>  OH2MENTHEN6ONE + hv = 10 LCARBON + OH              : {%TrGJTer} jx(ip_CH3OOH){§}; {&3017}
<J40203a> PINAL          + hv = C96O2 + CO + HO2             : {%TrGJTer} jx(ip_PINAL2HCO){§}; {&2419}
<J40203b> PINAL          + hv = PINENOL                      : {%TrGJTer} jx(ip_PINAL2ENOL){§}; {&3264, 3161} // Substituted vinyl alcohol in analogy to \kpp{CH3CHO} photolysis.
<J40204>  PERPINONIC     + hv = C96O2 + CO2 + OH             : {%TrGJTer} jx(ip_CH3OOH){§}+j_ACETOL; {&2419}
<J40205>  PINALOOH       + hv = C106O2 + OH                  : {%TrGJTer} jx(ip_CH3OOH){§}+jx(ip_HOCH2CHO){§}; {&2419}
<J40206>  PINALNO3       + hv = C106O2 + NO2                 : {%TrGJTer} j_IC3H7NO3+jx(ip_HOCH2CHO){§}; {&2419}
<J40207>  C106OOH        + hv = C716O2 + CH3COCH3 + OH       : {%TrGJTer} jx(ip_CH3OOH){§}+jx(ip_HOCH2CHO){§}; {&2419}
<J40208>  C106NO3        + hv = C716O2 + CH3COCH3 + NO2      : {%TrGJTer} j_IC3H7NO3+ jx(ip_HOCH2CHO){§}; {&2419}
<J40209>  C109OOH        + hv = C89CO3 + HCHO + OH           : {%TrGJTer} jx(ip_CH3OOH){§}+jx(ip_HOCH2CHO){§}; {&2419}
<J40210>  C109CO         + hv = C89CO3 + CO + HO2            : {%TrGJTer} jx(ip_MGLYOX){§}+jx(ip_HOCH2CHO){§}; {&2419}
<J40211>  LNAPINABOOH    + hv = PINAL + NO2 + OH             : {%TrGJTer} jx(ip_CH3OOH){§}; {&2419}
<J40212>  BPINAOOH       + hv = NOPINONE + HCHO + HO2 + OH   : {%TrGJTer} jx(ip_CH3OOH){§}; {&2419}
<J40213>  LNBPINABOOH    + hv = NOPINONE + HCHO + NO2 + OH   : {%TrGJTer} jx(ip_CH3OOH){§}; {&2419}
<J40214>  ROO6R1NO3      + hv = ROO6R3O2 + CH3COCH3 + NO2    : {%TrGJTer} 2.84*j_IC3H7NO3+jx(ip_CH3OOH){§}; {&3264}
<J40215>  RO6R1NO3       + hv = 9 LCARBON + HCHO + HO2 + NO2 : {%TrGJTer} 2.84*j_IC3H7NO3; {&3264}

{<J5nnn> ------------------------------- F -------------------------}{@\myhline}

{<J6nnn> ------------------------------- Cl ------------------------}{@\myhline}

// Cl only (#J60nn)
<J6000>  Cl2     + hv = Cl + Cl             : {%StTrGJ}  jx(ip_Cl2){§}; {&2342}

// Cl + O (#J61nn)
<J6100>  Cl2O2   + hv = 2 Cl                : {%StTrGJ}  jx(ip_Cl2O2){§}; {&2342}
<J6101>  OClO    + hv = ClO + O3P           : {%StTrGJ}  jx(ip_OClO){§}; {&2342}

// Cl + H (#J62nn)
<J6200>  HCl     + hv = Cl + H              : {%StGJ}    jx(ip_HCl){§}; {&2342}
<J6201>  HOCl    + hv = OH + Cl             : {%StTrGJ}  jx(ip_HOCl){§}; {&2342}

// Cl + N (#J63nn)
<J6300>  ClNO2   + hv = Cl + NO2            : {%TrGJ}    jx(ip_ClNO2){§}; {&2342}
<J6301a> ClNO3   + hv = Cl + NO3            : {%StTrGJ}  jx(ip_ClNO3){§}; {&2342}
<J6301b> ClNO3   + hv = ClO + NO2           : {%StTrGJ}  jx(ip_ClONO2){§}; {&2342}

// Cl + C (#J64nn)
<J6400>  CH3Cl   + hv = Cl + CH3            : {%StGJ}    jx(ip_CH3Cl){§}; {&2342}
<J6401>  CCl4    + hv = LCARBON + 4 Cl      : {%StGJ}    jx(ip_CCl4){§}; {&2342}
<J6402>  CH3CCl3 + hv = 2 LCARBON + 3 Cl    : {%StGJ}    jx(ip_CH3CCl3){§}; {&2342}

// Cl + F (#J65nn)
<J6500>  CFCl3   + hv = LCARBON + LFLUORINE + 3 Cl : {%StGJ} jx(ip_CFCl3){§}; {&2342} // Even though the elementary reaction produces only 1 Cl atom \citep{3256}, it is assumed here that eventually all Cl atoms are released in secondary reactions.
<J6501>  CF2Cl2  + hv = LCARBON + 2 LFLUORINE + 2 Cl : {%StGJ} jx(ip_CF2Cl2){§}; {&2342} // Even though the elementary reaction probably produces only 1 Cl atom (as for \chem{CFCl_3}), it is assumed here that eventually all Cl atoms are released in secondary reactions.

{<J7nnn> ------------------------------- Br ------------------------}{@\myhline}

// Br only (#J70nn)
<J7000>  Br2     + hv = Br + Br             : {%StTrGJ}  jx(ip_Br2){§}; {&2342}

// Br + O (#J71nn)
<J7100>  BrO     + hv = Br + O3P            : {%StTrGJ}  jx(ip_BrO){§}; {&2342}

// Br + H (#J72nn)
<J7200>  HOBr    + hv = Br + OH             : {%StTrGJ}  jx(ip_HOBr){§}; {&2342}

// Br + N (#J73nn)
<J7300>  BrNO2   + hv = Br + NO2            : {%TrGJ}    jx(ip_BrNO2){§}; {&2342}
<J7301>  BrNO3   + hv = .85 Br + .85 NO3 + .15 BrO + .15 NO2 : {%StTrGJ} jx(ip_BrNO3){§}; {&2342} // The quantum yields are recommended by \citet{3245} for $\lambda > 300 \unit{nm}$ and used here for the entire spectrum.

// Br + C (#J74nn)
<J7400>  CH3Br   + hv = Br + CH3                : {%StGJ} jx(ip_CH3Br){§}; {&2342}
<J7401>  CH2Br2  + hv = LCARBON + 2 Br {+CH3O2} : {%TrGJ} jx(ip_CH2Br2){§}; {&2342}
<J7402>  CHBr3   + hv = LCARBON + 3 Br {+CH3O2} : {%TrGJ} jx(ip_CHBr3){§}; {&2342}

// Br + F (#J75nn)
<J7500>  CF3Br   + hv = LCARBON + 3 LFLUORINE + Br   : {%StGJ} jx(ip_CF3Br){§}; {&2342}

// Br + Cl (#J76nn)
<J7600>  BrCl    + hv = Br + Cl                         : {%StTrGJ} jx(ip_BrCl){§}; {&2342}
<J7601>  CF2ClBr + hv = LCARBON + 2 LFLUORINE + Br + Cl : {%StGJ}   jx(ip_CF2ClBr){§}; {&2342}
<J7602>  CH2ClBr + hv = LCARBON + Br + Cl   {+CH3O2}    : {%TrGJ}   jx(ip_CH2ClBr){§}; {&2342}
<J7603>  CHCl2Br + hv = LCARBON + Br + 2 Cl {+CH3O2}    : {%TrGJ}   jx(ip_CHCl2Br){§}; {&2342}
<J7604>  CHClBr2 + hv = LCARBON + 2 Br + Cl {+CH3O2}    : {%TrGJ}   jx(ip_CHClBr2){§}; {&2342}

{<J8nnn> ------------------------------- I -------------------------}{@\myhline}

// I only (#J80nn)
<J8000>  I2      + hv = I + I               : {%TrGJ}  jx(ip_I2){§}; {&2342}

// I + O (#J81nn)
<J8100>  IO      + hv = I + O3P             : {%TrGJ}  jx(ip_IO){§}; {&2342}
// deleted: <J8101>  I2O2    + hv = 2 I     : {%TrGJ} 9.* jx(ip_Cl2O2){§};

// I + H (#J82nn)
<J8200>  HOI     + hv = I + OH              : {%TrGJ}  jx(ip_HOI){§}; {&2342}

// I + N (#J83nn)
<J8300>  INO2    + hv = I + NO2             : {%TrGJ}  jx(ip_INO2){§}; {&2342}
<J8301>  INO3    + hv = I + NO3             : {%TrGJ}  jx(ip_INO3){§}; {&2342}

// I + C (#J84nn)
<J8400>  CH2I2   + hv = 2 I + 2 HO2 + CO    : {%TrGJ}  jx(ip_CH2I2){§}; {&2342}
<J8401>  CH3I    + hv = I + CH3             : {%TrGJ}  jx(ip_CH3I){§}; {&2342}
<J8402>  C3H7I   + hv = 2 LCARBON + I + CH3 : {%TrGJ}  jx(ip_C3H7I){§}; {&2342}
<J8403>  CH2ClI  + hv = I + Cl + 2 HO2 + CO : {%TrGJ}  jx(ip_CH2ClI){§}; {&2342}

// I + Cl (#J86nn)
<J8600>  ICl     + hv = I + Cl              : {%TrGJ}  jx(ip_ICl){§}; {&2342}

// I + Br (#J87nn)
<J8700>  IBr     + hv = I + Br              : {%TrGJ}  jx(ip_IBr){§}; {&2342}

{<J9nnn> ------------------------------- S -------------------------}{@\myhline}
//<J9000>  OCS  + hv = CO + S                 : {%StGJ} jx(ip_OCS){§}; {&2342}
//<J9001>  SO2 + hv = SO +  S                 : {%StGJ} unknown{§}; {&2342}
//<J9002>  SF6 + hv = PROD                    : {%StGJ} jx(ip_SF6){§}; {&2342}

{<HETnnn> ------------------------------ HET ------------------------}{@\myhline}

// heterogeneous reactions - from Mainz Chemical Box Model

// N (#HET300-#HET3nn)
<HET300> N2O5 + H2O  = 2 HNO3       : {%StHet} khet_St(ihs_N2O5_H2O){§}; {&SGN}
// mz_pj_20070209+: changed for budgeting (SCAV) according to mz_ht_20070209
// <HET301> N2O5        = PROD         : {%TrHet} khet_Tr(iht_N2O5){§}; {&SGN}
// <HET302> HNO3        = PROD         : {%TrHet} khet_Tr(iht_HNO3){§}; {&SGN}
<HET301> N2O5        = 2 NO3m_cs + 2 Hp_cs : {%TrHet} khet_Tr(iht_N2O5){§}; {&SGN}
// mz_ap_20090730+ removed due to problems in M2E23_exp07
// <HET302> HNO3        = NO3m_cs + Hp_cs : {%TrHet} khet_Tr(iht_HNO3){§}; {&SGN}
// mz_ap_20090730-
// mz_pj_20070209-

// Cl  + O (#HET610-#HET619)
<HET610> HOCl  + HCl = Cl2 + H2O    : {%StHet}   khet_St(ihs_HOCl_HCl){§}; {&SGN}

// Cl  + N (#HET620-#HET629)
<HET620> ClNO3 + HCl = Cl2 + HNO3   : {%StHet}   khet_St(ihs_ClNO3_HCl){§}; {&SGN}
<HET621> ClNO3 + H2O = HOCl + HNO3  : {%StHet}   khet_St(ihs_ClNO3_H2O){§}; {&SGN}
<HET622> N2O5  + HCl = ClNO2 + HNO3 : {%StHet}   khet_St(ihs_N2O5_HCl){§}; {&SGN}

// Br + O (#HET710-#HET719)
<HET710> HOBr  + HBr = Br2 + H2O    : {%StHet}   khet_St(ihs_HOBr_HBr){§}; {&SGN}

// Br + N (#HET720-#HET729)
<HET720> BrNO3 + H2O = HOBr + HNO3  : {%StHet}   khet_St(ihs_BrNO3_H2O){§}; {&SGN}

// Br + Cl (#HET740-#HET749)
<HET740> ClNO3 + HBr = BrCl + HNO3  : {%StHet}   khet_St(ihs_ClNO3_HBr){§}; {&SGN}
<HET741> BrNO3 + HCl = BrCl + HNO3  : {%StHet}   khet_St(ihs_BrNO3_HCl){§}; {&SGN}
<HET742> HOCl  + HBr = BrCl + H2O   : {%StHet}   khet_St(ihs_HOCl_HBr){§}; {&SGN}
<HET743> HOBr  + HCl = BrCl + H2O   : {%StHet}   khet_St(ihs_HOBr_HCl){§}; {&SGN}
// Hg (#HET1001-#HET10nn)
<HET1001> Hg      = RGM_cs                        : {%StTrHet} khet_Tr(iht_Hg){§}  + khet_St(ihs_Hg){§}; {&SGN}
<HET1002> HgO     = RGM_cs                        : {%StTrHet} khet_Tr(iht_RGM){§} + khet_St(ihs_RGM){§}; {&SGN}
<HET1003> HgCl    = RGM_cs + LCHLORINE            : {%StTrHet} khet_Tr(iht_RGM){§} + khet_St(ihs_RGM){§}; {&SGN}
<HET1004> HgCl2   = RGM_cs + 2 LCHLORINE          : {%StTrHet} khet_Tr(iht_RGM){§} + khet_St(ihs_RGM){§}; {&SGN}
<HET1005> HgBr    = RGM_cs + LBROMINE             : {%StTrHet} khet_Tr(iht_RGM){§} + khet_St(ihs_RGM){§}; {&SGN}
<HET1006> HgBr2   = RGM_cs + 2 LBROMINE           : {%StTrHet} khet_Tr(iht_RGM){§} + khet_St(ihs_RGM){§}; {&SGN}
<HET1007> ClHgBr  = RGM_cs + LCHLORINE + LBROMINE : {%StTrHet} khet_Tr(iht_RGM){§} + khet_St(ihs_RGM){§}; {&SGN}
<HET1008> BrHgOBr = RGM_cs + 2 LBROMINE           : {%StTrHet} khet_Tr(iht_RGM){§} + khet_St(ihs_RGM){§}; {&SGN}
<HET1009> ClHgOBr = RGM_cs + LCHLORINE + LBROMINE : {%StTrHet} khet_Tr(iht_RGM){§} + khet_St(ihs_RGM){§}; {&SGN}

// ---------------------------------------------------------------------------
