# Supplementary material for: Oxidation of low-molecular weight organic compounds in clouddroplets: development of the JAMOC chemical mechanism inCAABA/MECCA (version 4.5.0gmdd)
Source: Copernicus journal article supplement (doi:10.5194/gmd-2020-337), 2020-10-29
Supplement: Supplementary file 20 [file gmd-2020-337-supplement.zip › caaba_4.5.0gmdd/mecca/graphviz/xgraphviz]

#! /bin/tcsh -f

if ( $1 == "" ) then
  echo "example usage:"
  echo "  ./xgraphviz C1.spc C.spc both submodel"
  exit
endif

# define main species (appear in yellow filled oval):
set spc1file  = "$1"
# define secondary species:
set spc2file  = "$2"
# define labeltype:
# eqnid    -> show only eqnid on arrows
# reactant -> show only the other reactants on arrows
# both     -> show both eqnid and reactants
set labeltype = "$3"
set submodel  = "$4"

set eqnfile  = ../$submodel.eqn
set basename = $spc1file:r # remove suffix with ":r"
set dotfile  = $basename.dot
set pdffile  = ${submodel}_$basename.pdf

echo "// created automatically by xgraphviz, DO NOT EDIT\!" > $dotfile
echo "creating $pdffile ..."

# create dependencies with awk script:
# for strange reasons, gawk only works properly if LC_ALL = C
setenv LC_ALL C
gawk -f eqn2dot.awk -v spc1file="$spc1file" -v spc2file="$spc2file" -v labeltype="$labeltype" $eqnfile

# create inputfile for graphviz:
echo "digraph $basename {" >> $dotfile
echo '  concentrate=true;' >> $dotfile
echo '  rankdir=LR;'       >> $dotfile
echo '  size="8,8";'       >> $dotfile

echo '"'$basename'\\nchemistry"'     >> $dotfile
echo '  [shape=box, fontsize=30,'    >> $dotfile
echo '  style="filled", color=red];' >> $dotfile

#mz_hr_20130424+
set dotenhanced = `dot -V |& awk '{if($5>=2.31){print 1}}'`
if ( $dotenhanced ) then
  # color gradient along reaction paths
  # echo 'edge[color="black;0.2:firebrick4;0.2:firebrick;0.2:darkgoldenrod;0.2:darkgoldenrod1;0.2"];' >> $dotfile
  echo 'edge[fontsize=32,penwidth=3,color="black;0.16:firebrick4;0.16:firebrick;0.2:darkgoldenrod;0.16:darkgoldenrod3;0.16:darkgoldenrod1;0.16"];' >> $dotfile
endif
#mz_hr_20130424-

echo 'subgraph species {' >> $dotfile
echo 'node[shape=oval,'   >> $dotfile
echo '  color=yellow,'    >> $dotfile
echo '  style="filled"];' >> $dotfile
# # for strange reasons, gawk only works properly if LC_ALL = C
# setenv LC_ALL C
# grep -E '^ *[A-Za-z0-9_]+' $spc1file \
#   | sed 's/[^A-Za-z0-9_].*//' \
#   | sed 's/$/;/' >> $dotfile
sort node.dot | uniq >> $dotfile
echo '}' >> $dotfile

sort depend.dot | uniq >> $dotfile
echo '}'               >> $dotfile

# run graphviz:
# create pdf:
dot -Tpdf -o $pdffile $dotfile
# alternatively, create ps file, then convert to pdf:
#dot -Tps2 -o tmp_1.ps $dotfile
#ps2pdf -f tmp_1.ps $pdffile
# svg output is not satisfying:
#dot -Tsvg -o tmp_1.svg $dotfile

# cleanup:
rm node.dot depend.dot
#rm tmp_*.ps

exit
