# Supplementary material for: Oxidation of low-molecular weight organic compounds in clouddroplets: development of the JAMOC chemical mechanism inCAABA/MECCA (version 4.5.0gmdd)
Source: Copernicus journal article supplement (doi:10.5194/gmd-2020-337), 2020-10-29
Supplement: Supplementary file 20 [file gmd-2020-337-supplement.zip › caaba_4.5.0gmdd/mecca/messy_mecca_mr2c_si.inc]

! -*- f90 -*- created automatically by xmecca	DO NOT EDIT!
Conc(:	ind_LCARBON) = c_air(:) * zmrbc(:	idt_LCARBON)
Conc(:	ind_CO2H3CO2H) = c_air(:) * zmrbc(:	idt_CO2H3CO2H)
Conc(:	ind_NBZFUONE) = c_air(:) * zmrbc(:	idt_NBZFUONE)
Conc(:	ind_NC4MDCO2H) = c_air(:) * zmrbc(:	idt_NC4MDCO2H)
Conc(:	ind_PBZQO2) = c_air(:) * zmrbc(:	idt_PBZQO2)
Conc(:	ind_C8BC) = c_air(:) * zmrbc(:	idt_C8BC)
Conc(:	ind_CH3SO3H) = c_air(:) * zmrbc(:	idt_CH3SO3H)
Conc(:	ind_H2SO4) = c_air(:) * zmrbc(:	idt_H2SO4)
Conc(:	ind_C1ODC2O2C4OOH) = c_air(:) * zmrbc(:	idt_C1ODC2O2C4OOH)
Conc(:	ind_NH3) = c_air(:) * zmrbc(:	idt_NH3)
Conc(:	ind_C2H6) = c_air(:) * zmrbc(:	idt_C2H6)
Conc(:	ind_IC4H10) = c_air(:) * zmrbc(:	idt_IC4H10)
Conc(:	ind_NC4H10) = c_air(:) * zmrbc(:	idt_NC4H10)
Conc(:	ind_CPDKETENE) = c_air(:) * zmrbc(:	idt_CPDKETENE)
Conc(:	ind_CH3SO3) = c_air(:) * zmrbc(:	idt_CH3SO3)
Conc(:	ind_C3H8) = c_air(:) * zmrbc(:	idt_C3H8)
Conc(:	ind_ACCOMEPAN) = c_air(:) * zmrbc(:	idt_ACCOMEPAN)
Conc(:	ind_NOPINDOOH) = c_air(:) * zmrbc(:	idt_NOPINDOOH)
Conc(:	ind_C109OOH) = c_air(:) * zmrbc(:	idt_C109OOH)
Conc(:	ind_C109CO) = c_air(:) * zmrbc(:	idt_C109CO)
Conc(:	ind_CH3Cl) = c_air(:) * zmrbc(:	idt_CH3Cl)
Conc(:	ind_NCO) = c_air(:) * zmrbc(:	idt_NCO)
Conc(:	ind_C1OOHC3O2C4OD) = c_air(:) * zmrbc(:	idt_C1OOHC3O2C4OD)
Conc(:	ind_ROO6R1O2) = c_air(:) * zmrbc(:	idt_ROO6R1O2)
Conc(:	ind_H2OH2O) = c_air(:) * zmrbc(:	idt_H2OH2O)
Conc(:	ind_HOC2H4CO2H) = c_air(:) * zmrbc(:	idt_HOC2H4CO2H)
Conc(:	ind_HOCH2COCH2OOH) = c_air(:) * zmrbc(:	idt_HOCH2COCH2OOH)
Conc(:	ind_N2O) = c_air(:) * zmrbc(:	idt_N2O)
Conc(:	ind_CO14O3CO2H) = c_air(:) * zmrbc(:	idt_CO14O3CO2H)
Conc(:	ind_MALNHYOHCO) = c_air(:) * zmrbc(:	idt_MALNHYOHCO)
Conc(:	ind_C512O2) = c_air(:) * zmrbc(:	idt_C512O2)
Conc(:	ind_C24O3CCO2H) = c_air(:) * zmrbc(:	idt_C24O3CCO2H)
Conc(:	ind_C5DIALCO) = c_air(:) * zmrbc(:	idt_C5DIALCO)
Conc(:	ind_DNPHEN) = c_air(:) * zmrbc(:	idt_DNPHEN)
Conc(:	ind_MCPDKETENE) = c_air(:) * zmrbc(:	idt_MCPDKETENE)
Conc(:	ind_TOLUENE) = c_air(:) * zmrbc(:	idt_TOLUENE)
Conc(:	ind_DNCRES) = c_air(:) * zmrbc(:	idt_DNCRES)
Conc(:	ind_C810OOH) = c_air(:) * zmrbc(:	idt_C810OOH)
Conc(:	ind_NSTYRENOOH) = c_air(:) * zmrbc(:	idt_NSTYRENOOH)
Conc(:	ind_C98OOH) = c_air(:) * zmrbc(:	idt_C98OOH)
Conc(:	ind_C106OOH) = c_air(:) * zmrbc(:	idt_C106OOH)
Conc(:	ind_ETHGLY) = c_air(:) * zmrbc(:	idt_ETHGLY)
Conc(:	ind_NC3H7O2) = c_air(:) * zmrbc(:	idt_NC3H7O2)
Conc(:	ind_LISOPAB) = c_air(:) * zmrbc(:	idt_LISOPAB)
Conc(:	ind_LISOPCD) = c_air(:) * zmrbc(:	idt_LISOPCD)
Conc(:	ind_LME3FURANO2) = c_air(:) * zmrbc(:	idt_LME3FURANO2)
Conc(:	ind_BZOBIPEROH) = c_air(:) * zmrbc(:	idt_BZOBIPEROH)
Conc(:	ind_TLOBIPEROH) = c_air(:) * zmrbc(:	idt_TLOBIPEROH)
Conc(:	ind_PROPENOL) = c_air(:) * zmrbc(:	idt_PROPENOL)
Conc(:	ind_NISOPOOH) = c_air(:) * zmrbc(:	idt_NISOPOOH)
Conc(:	ind_LIEPOX) = c_air(:) * zmrbc(:	idt_LIEPOX)
Conc(:	ind_C6H5OOH) = c_air(:) * zmrbc(:	idt_C6H5OOH)
Conc(:	ind_CATEC1OOH) = c_air(:) * zmrbc(:	idt_CATEC1OOH)
Conc(:	ind_C6H5CH2OOH) = c_air(:) * zmrbc(:	idt_C6H5CH2OOH)
Conc(:	ind_MCATEC1OOH) = c_air(:) * zmrbc(:	idt_MCATEC1OOH)
Conc(:	ind_OXYL1OOH) = c_air(:) * zmrbc(:	idt_OXYL1OOH)
Conc(:	ind_C812OOH) = c_air(:) * zmrbc(:	idt_C812OOH)
Conc(:	ind_C85OOH) = c_air(:) * zmrbc(:	idt_C85OOH)
Conc(:	ind_C89OOH) = c_air(:) * zmrbc(:	idt_C89OOH)
Conc(:	ind_C97OOH) = c_air(:) * zmrbc(:	idt_C97OOH)
Conc(:	ind_C98O2) = c_air(:) * zmrbc(:	idt_C98O2)
Conc(:	ind_CN) = c_air(:) * zmrbc(:	idt_CN)
Conc(:	ind_PINALOOH) = c_air(:) * zmrbc(:	idt_PINALOOH)
Conc(:	ind_C106O2) = c_air(:) * zmrbc(:	idt_C106O2)
Conc(:	ind_NH2OH) = c_air(:) * zmrbc(:	idt_NH2OH)
Conc(:	ind_C312COCO3) = c_air(:) * zmrbc(:	idt_C312COCO3)
Conc(:	ind_CO23C4CO3) = c_air(:) * zmrbc(:	idt_CO23C4CO3)
Conc(:	ind_BIACETO2) = c_air(:) * zmrbc(:	idt_BIACETO2)
Conc(:	ind_C2H5OH) = c_air(:) * zmrbc(:	idt_C2H5OH)
Conc(:	ind_PHCOOH) = c_air(:) * zmrbc(:	idt_PHCOOH)
Conc(:	ind_C810O2) = c_air(:) * zmrbc(:	idt_C810O2)
Conc(:	ind_N2O5) = c_air(:) * zmrbc(:	idt_N2O5)
Conc(:	ind_PR2O2HNO3) = c_air(:) * zmrbc(:	idt_PR2O2HNO3)
Conc(:	ind_CHOC3COO2) = c_air(:) * zmrbc(:	idt_CHOC3COO2)
Conc(:	ind_MACO3H) = c_air(:) * zmrbc(:	idt_MACO3H)
Conc(:	ind_MALANHYOOH) = c_air(:) * zmrbc(:	idt_MALANHYOOH)
Conc(:	ind_NH2O) = c_air(:) * zmrbc(:	idt_NH2O)
Conc(:	ind_C511OOH) = c_air(:) * zmrbc(:	idt_C511OOH)
Conc(:	ind_C59OOH) = c_air(:) * zmrbc(:	idt_C59OOH)
Conc(:	ind_NTLFUOOH) = c_air(:) * zmrbc(:	idt_NTLFUOOH)
Conc(:	ind_MCATECHOL) = c_air(:) * zmrbc(:	idt_MCATECHOL)
Conc(:	ind_NPTLQOOH) = c_air(:) * zmrbc(:	idt_NPTLQOOH)
Conc(:	ind_C811O2) = c_air(:) * zmrbc(:	idt_C811O2)
Conc(:	ind_CH3CO3H) = c_air(:) * zmrbc(:	idt_CH3CO3H)
Conc(:	ind_C86OOH) = c_air(:) * zmrbc(:	idt_C86OOH)
Conc(:	ind_C96OOH) = c_air(:) * zmrbc(:	idt_C96OOH)
Conc(:	ind_HOCH2CH2O) = c_air(:) * zmrbc(:	idt_HOCH2CH2O)
Conc(:	ind_LNAPINABOOH) = c_air(:) * zmrbc(:	idt_LNAPINABOOH)
Conc(:	ind_C1ODC2OOHC4OD) = c_air(:) * zmrbc(:	idt_C1ODC2OOHC4OD)
Conc(:	ind_IC3H7OOH) = c_air(:) * zmrbc(:	idt_IC3H7OOH)
Conc(:	ind_C3PAN1) = c_air(:) * zmrbc(:	idt_C3PAN1)
Conc(:	ind_C3PAN2) = c_air(:) * zmrbc(:	idt_C3PAN2)
Conc(:	ind_IBUTOLBOOH) = c_air(:) * zmrbc(:	idt_IBUTOLBOOH)
Conc(:	ind_MACO2H) = c_air(:) * zmrbc(:	idt_MACO2H)
Conc(:	ind_EPXDLPAN) = c_air(:) * zmrbc(:	idt_EPXDLPAN)
Conc(:	ind_MALDIALPAN) = c_air(:) * zmrbc(:	idt_MALDIALPAN)
Conc(:	ind_NBZFUOOH) = c_air(:) * zmrbc(:	idt_NBZFUOOH)
Conc(:	ind_DB1O) = c_air(:) * zmrbc(:	idt_DB1O)
Conc(:	ind_C5DIALOOH) = c_air(:) * zmrbc(:	idt_C5DIALOOH)
Conc(:	ind_C5COO2NO2) = c_air(:) * zmrbc(:	idt_C5COO2NO2)
Conc(:	ind_BENZENE) = c_air(:) * zmrbc(:	idt_BENZENE)
Conc(:	ind_BZBIPEROOH) = c_air(:) * zmrbc(:	idt_BZBIPEROOH)
Conc(:	ind_C2H5OOH) = c_air(:) * zmrbc(:	idt_C2H5OOH)
Conc(:	ind_PBZQONE) = c_air(:) * zmrbc(:	idt_PBZQONE)
Conc(:	ind_NNCATECOOH) = c_air(:) * zmrbc(:	idt_NNCATECOOH)
Conc(:	ind_NPHENOOH) = c_air(:) * zmrbc(:	idt_NPHENOOH)
Conc(:	ind_C6CO2OHPAN) = c_air(:) * zmrbc(:	idt_C6CO2OHPAN)
Conc(:	ind_C811CO3) = c_air(:) * zmrbc(:	idt_C811CO3)
Conc(:	ind_BPINAOOH) = c_air(:) * zmrbc(:	idt_BPINAOOH)
Conc(:	ind_HCOCO3H) = c_air(:) * zmrbc(:	idt_HCOCO3H)
Conc(:	ind_HNO4) = c_air(:) * zmrbc(:	idt_HNO4)
Conc(:	ind_C10PAN2) = c_air(:) * zmrbc(:	idt_C10PAN2)
Conc(:	ind_LNBPINABOOH) = c_air(:) * zmrbc(:	idt_LNBPINABOOH)
Conc(:	ind_DMSO) = c_air(:) * zmrbc(:	idt_DMSO)
Conc(:	ind_BIACETOH) = c_air(:) * zmrbc(:	idt_BIACETOH)
Conc(:	ind_CHOC3COCO3) = c_air(:) * zmrbc(:	idt_CHOC3COCO3)
Conc(:	ind_LISOPEFO) = c_air(:) * zmrbc(:	idt_LISOPEFO)
Conc(:	ind_NCATECHOL) = c_air(:) * zmrbc(:	idt_NCATECHOL)
Conc(:	ind_C813O2) = c_air(:) * zmrbc(:	idt_C813O2)
Conc(:	ind_EBENZ) = c_air(:) * zmrbc(:	idt_EBENZ)
Conc(:	ind_LXYL) = c_air(:) * zmrbc(:	idt_LXYL)
Conc(:	ind_C97O2) = c_air(:) * zmrbc(:	idt_C97O2)
Conc(:	ind_LTMB) = c_air(:) * zmrbc(:	idt_LTMB)
Conc(:	ind_C2H2) = c_air(:) * zmrbc(:	idt_C2H2)
Conc(:	ind_PINALO2) = c_air(:) * zmrbc(:	idt_PINALO2)
Conc(:	ind_LHAROM) = c_air(:) * zmrbc(:	idt_LHAROM)
Conc(:	ind_CRESOL) = c_air(:) * zmrbc(:	idt_CRESOL)
Conc(:	ind_HCOCCH3CO) = c_air(:) * zmrbc(:	idt_HCOCCH3CO)
Conc(:	ind_TC4H9OOH) = c_air(:) * zmrbc(:	idt_TC4H9OOH)
Conc(:	ind_MALANHY) = c_air(:) * zmrbc(:	idt_MALANHY)
Conc(:	ind_LBUT1ENOOH) = c_air(:) * zmrbc(:	idt_LBUT1ENOOH)
Conc(:	ind_C5134CO2OH) = c_air(:) * zmrbc(:	idt_C5134CO2OH)
Conc(:	ind_HCOCOCH2OOH) = c_air(:) * zmrbc(:	idt_HCOCOCH2OOH)
Conc(:	ind_ISOPBNO3) = c_air(:) * zmrbc(:	idt_ISOPBNO3)
Conc(:	ind_LNISOOH) = c_air(:) * zmrbc(:	idt_LNISOOH)
Conc(:	ind_NDNPHENOOH) = c_air(:) * zmrbc(:	idt_NDNPHENOOH)
Conc(:	ind_HYPROPO2H) = c_air(:) * zmrbc(:	idt_HYPROPO2H)
Conc(:	ind_CRESOOH) = c_air(:) * zmrbc(:	idt_CRESOOH)
Conc(:	ind_CH3CO2H) = c_air(:) * zmrbc(:	idt_CH3CO2H)
Conc(:	ind_IC3H7O2) = c_air(:) * zmrbc(:	idt_IC3H7O2)
Conc(:	ind_MNCATECH) = c_air(:) * zmrbc(:	idt_MNCATECH)
Conc(:	ind_C89PAN) = c_air(:) * zmrbc(:	idt_C89PAN)
Conc(:	ind_HOCHCHO) = c_air(:) * zmrbc(:	idt_HOCHCHO)
Conc(:	ind_HOOCH2CO2H) = c_air(:) * zmrbc(:	idt_HOOCH2CO2H)
Conc(:	ind_NCCH2O2) = c_air(:) * zmrbc(:	idt_NCCH2O2)
Conc(:	ind_EZCH3CO2CHCHO) = c_air(:) * zmrbc(:	idt_EZCH3CO2CHCHO)
Conc(:	ind_C6CO4DB) = c_air(:) * zmrbc(:	idt_C6CO4DB)
Conc(:	ind_NPHEN1O2) = c_air(:) * zmrbc(:	idt_NPHEN1O2)
Conc(:	ind_C7CO4DB) = c_air(:) * zmrbc(:	idt_C7CO4DB)
Conc(:	ind_NCRES1O2) = c_air(:) * zmrbc(:	idt_NCRES1O2)
Conc(:	ind_NO3CH2CO3) = c_air(:) * zmrbc(:	idt_NO3CH2CO3)
Conc(:	ind_CH3SO2) = c_air(:) * zmrbc(:	idt_CH3SO2)
Conc(:	ind_HYETHO2H) = c_air(:) * zmrbc(:	idt_HYETHO2H)
Conc(:	ind_MPAN) = c_air(:) * zmrbc(:	idt_MPAN)
Conc(:	ind_NC4DCO2H) = c_air(:) * zmrbc(:	idt_NC4DCO2H)
Conc(:	ind_LC4H9OOH) = c_air(:) * zmrbc(:	idt_LC4H9OOH)
Conc(:	ind_LMEKO2) = c_air(:) * zmrbc(:	idt_LMEKO2)
Conc(:	ind_C2H5O2NO2) = c_air(:) * zmrbc(:	idt_C2H5O2NO2)
Conc(:	ind_ETHOHNO3) = c_air(:) * zmrbc(:	idt_ETHOHNO3)
Conc(:	ind_DB2OOH) = c_air(:) * zmrbc(:	idt_DB2OOH)
Conc(:	ind_HOCH2COCHO) = c_air(:) * zmrbc(:	idt_HOCH2COCHO)
Conc(:	ind_PPN) = c_air(:) * zmrbc(:	idt_PPN)
Conc(:	ind_CH3COCHO2CHO) = c_air(:) * zmrbc(:	idt_CH3COCHO2CHO)
Conc(:	ind_NCRESOOH) = c_air(:) * zmrbc(:	idt_NCRESOOH)
Conc(:	ind_HOCH2CO3H) = c_air(:) * zmrbc(:	idt_HOCH2CO3H)
Conc(:	ind_CH3O2NO2) = c_air(:) * zmrbc(:	idt_CH3O2NO2)
Conc(:	ind_BrNO3) = c_air(:) * zmrbc(:	idt_BrNO3)
Conc(:	ind_TC4H9O2) = c_air(:) * zmrbc(:	idt_TC4H9O2)
Conc(:	ind_C511O2) = c_air(:) * zmrbc(:	idt_C511O2)
Conc(:	ind_CH3CN) = c_air(:) * zmrbc(:	idt_CH3CN)
Conc(:	ind_C513O2) = c_air(:) * zmrbc(:	idt_C513O2)
Conc(:	ind_CH3COCH2O2NO2) = c_air(:) * zmrbc(:	idt_CH3COCH2O2NO2)
Conc(:	ind_CO2H3CO3H) = c_air(:) * zmrbc(:	idt_CO2H3CO3H)
Conc(:	ind_ISOPDNO3) = c_air(:) * zmrbc(:	idt_ISOPDNO3)
Conc(:	ind_BZEMUCCO3) = c_air(:) * zmrbc(:	idt_BZEMUCCO3)
Conc(:	ind_C6H5CH2O2) = c_air(:) * zmrbc(:	idt_C6H5CH2O2)
Conc(:	ind_HO12CO3C4) = c_air(:) * zmrbc(:	idt_HO12CO3C4)
Conc(:	ind_PTLQONE) = c_air(:) * zmrbc(:	idt_PTLQONE)
Conc(:	ind_NHOH) = c_air(:) * zmrbc(:	idt_NHOH)
Conc(:	ind_CH3CHCO) = c_air(:) * zmrbc(:	idt_CH3CHCO)
Conc(:	ind_CH2CHOH) = c_air(:) * zmrbc(:	idt_CH2CHOH)
Conc(:	ind_LNAPINABO2) = c_air(:) * zmrbc(:	idt_LNAPINABO2)
Conc(:	ind_HBr) = c_air(:) * zmrbc(:	idt_HBr)
Conc(:	ind_HOBr) = c_air(:) * zmrbc(:	idt_HOBr)
Conc(:	ind_CH2OOA) = c_air(:) * zmrbc(:	idt_CH2OOA)
Conc(:	ind_HOCH2CO2H) = c_air(:) * zmrbc(:	idt_HOCH2CO2H)
Conc(:	ind_MACRO) = c_air(:) * zmrbc(:	idt_MACRO)
Conc(:	ind_CH3NO3) = c_air(:) * zmrbc(:	idt_CH3NO3)
Conc(:	ind_C85O2) = c_air(:) * zmrbc(:	idt_C85O2)
Conc(:	ind_C89O2) = c_air(:) * zmrbc(:	idt_C89O2)
Conc(:	ind_C85CO3) = c_air(:) * zmrbc(:	idt_C85CO3)
Conc(:	ind_PAN) = c_air(:) * zmrbc(:	idt_PAN)
Conc(:	ind_PHAN) = c_air(:) * zmrbc(:	idt_PHAN)
Conc(:	ind_MACRNO3) = c_air(:) * zmrbc(:	idt_MACRNO3)
Conc(:	ind_NISOPO2) = c_air(:) * zmrbc(:	idt_NISOPO2)
Conc(:	ind_LHC4ACCHO) = c_air(:) * zmrbc(:	idt_LHC4ACCHO)
Conc(:	ind_TOL1O) = c_air(:) * zmrbc(:	idt_TOL1O)
Conc(:	ind_C812O2) = c_air(:) * zmrbc(:	idt_C812O2)
Conc(:	ind_STYRENE) = c_air(:) * zmrbc(:	idt_STYRENE)
Conc(:	ind_PHENOL) = c_air(:) * zmrbc(:	idt_PHENOL)
Conc(:	ind_CATECHOL) = c_air(:) * zmrbc(:	idt_CATECHOL)
Conc(:	ind_C6H5O) = c_air(:) * zmrbc(:	idt_C6H5O)
Conc(:	ind_NOPINONE) = c_air(:) * zmrbc(:	idt_NOPINONE)
Conc(:	ind_TLFUO2) = c_air(:) * zmrbc(:	idt_TLFUO2)
Conc(:	ind_NTLFUO2) = c_air(:) * zmrbc(:	idt_NTLFUO2)
Conc(:	ind_HYPERACET) = c_air(:) * zmrbc(:	idt_HYPERACET)
Conc(:	ind_NPHEN1O) = c_air(:) * zmrbc(:	idt_NPHEN1O)
Conc(:	ind_HVMK) = c_air(:) * zmrbc(:	idt_HVMK)
Conc(:	ind_NBZFUO2) = c_air(:) * zmrbc(:	idt_NBZFUO2)
Conc(:	ind_TLBIPEROOH) = c_air(:) * zmrbc(:	idt_TLBIPEROOH)
Conc(:	ind_TLEMUCCO3) = c_air(:) * zmrbc(:	idt_TLEMUCCO3)
Conc(:	ind_BZFUO2) = c_air(:) * zmrbc(:	idt_BZFUO2)
Conc(:	ind_MNNCATECO2) = c_air(:) * zmrbc(:	idt_MNNCATECO2)
Conc(:	ind_NCRES1O) = c_air(:) * zmrbc(:	idt_NCRES1O)
Conc(:	ind_MACO2) = c_air(:) * zmrbc(:	idt_MACO2)
Conc(:	ind_PRONO3BO2) = c_air(:) * zmrbc(:	idt_PRONO3BO2)
Conc(:	ind_C96O2) = c_air(:) * zmrbc(:	idt_C96O2)
Conc(:	ind_BPINENE) = c_air(:) * zmrbc(:	idt_BPINENE)
Conc(:	ind_CAMPHENE) = c_air(:) * zmrbc(:	idt_CAMPHENE)
Conc(:	ind_SABINENE) = c_air(:) * zmrbc(:	idt_SABINENE)
Conc(:	ind_BPINAO2) = c_air(:) * zmrbc(:	idt_BPINAO2)
Conc(:	ind_HCOCOHCO3) = c_air(:) * zmrbc(:	idt_HCOCOHCO3)
Conc(:	ind_IBUTDIAL) = c_air(:) * zmrbc(:	idt_IBUTDIAL)
Conc(:	ind_C5DIALO2) = c_air(:) * zmrbc(:	idt_C5DIALO2)
Conc(:	ind_Cl) = c_air(:) * zmrbc(:	idt_Cl)
Conc(:	ind_H2) = c_air(:) * zmrbc(:	idt_H2)
Conc(:	ind_HCOC5) = c_air(:) * zmrbc(:	idt_HCOC5)
Conc(:	ind_C615CO2O2) = c_air(:) * zmrbc(:	idt_C615CO2O2)
Conc(:	ind_CH3CHOHOOH) = c_air(:) * zmrbc(:	idt_CH3CHOHOOH)
Conc(:	ind_NBZQO2) = c_air(:) * zmrbc(:	idt_NBZQO2)
Conc(:	ind_NPHENO2) = c_air(:) * zmrbc(:	idt_NPHENO2)
Conc(:	ind_C6H5CO3) = c_air(:) * zmrbc(:	idt_C6H5CO3)
Conc(:	ind_HOCH2OOH) = c_air(:) * zmrbc(:	idt_HOCH2OOH)
Conc(:	ind_IBUTOLBO2) = c_air(:) * zmrbc(:	idt_IBUTOLBO2)
Conc(:	ind_HCOCH2CHO) = c_air(:) * zmrbc(:	idt_HCOCH2CHO)
Conc(:	ind_NSTYRENO2) = c_air(:) * zmrbc(:	idt_NSTYRENO2)
Conc(:	ind_HCN) = c_air(:) * zmrbc(:	idt_HCN)
Conc(:	ind_LNBPINABO2) = c_air(:) * zmrbc(:	idt_LNBPINABO2)
Conc(:	ind_LHMVKABOOH) = c_air(:) * zmrbc(:	idt_LHMVKABOOH)
Conc(:	ind_CO14O3CHO) = c_air(:) * zmrbc(:	idt_CO14O3CHO)
Conc(:	ind_HONO) = c_air(:) * zmrbc(:	idt_HONO)
Conc(:	ind_HNO) = c_air(:) * zmrbc(:	idt_HNO)
Conc(:	ind_NH2) = c_air(:) * zmrbc(:	idt_NH2)
Conc(:	ind_CO13C4CHO) = c_air(:) * zmrbc(:	idt_CO13C4CHO)
Conc(:	ind_LDISOPACO2) = c_air(:) * zmrbc(:	idt_LDISOPACO2)
Conc(:	ind_CRESO2) = c_air(:) * zmrbc(:	idt_CRESO2)
Conc(:	ind_PTLQO2) = c_air(:) * zmrbc(:	idt_PTLQO2)
Conc(:	ind_ACCOMECO3) = c_air(:) * zmrbc(:	idt_ACCOMECO3)
Conc(:	ind_CH3OOH) = c_air(:) * zmrbc(:	idt_CH3OOH)
Conc(:	ind_NCRESO2) = c_air(:) * zmrbc(:	idt_NCRESO2)
Conc(:	ind_NPTLQO2) = c_air(:) * zmrbc(:	idt_NPTLQO2)
Conc(:	ind_C6CO2OHCO3) = c_air(:) * zmrbc(:	idt_C6CO2OHCO3)
Conc(:	ind_C33CO) = c_air(:) * zmrbc(:	idt_C33CO)
Conc(:	ind_PINAL) = c_air(:) * zmrbc(:	idt_PINAL)
Conc(:	ind_C96CO3) = c_air(:) * zmrbc(:	idt_C96CO3)
Conc(:	ind_MEPROPENE) = c_air(:) * zmrbc(:	idt_MEPROPENE)
Conc(:	ind_LC4H9O2) = c_air(:) * zmrbc(:	idt_LC4H9O2)
Conc(:	ind_MEK) = c_air(:) * zmrbc(:	idt_MEK)
Conc(:	ind_BUT1ENE) = c_air(:) * zmrbc(:	idt_BUT1ENE)
Conc(:	ind_LNISO3) = c_air(:) * zmrbc(:	idt_LNISO3)
Conc(:	ind_HYPROPO2) = c_air(:) * zmrbc(:	idt_HYPROPO2)
Conc(:	ind_CH3COCH3) = c_air(:) * zmrbc(:	idt_CH3COCH3)
Conc(:	ind_HOC2H4CO3) = c_air(:) * zmrbc(:	idt_HOC2H4CO3)
Conc(:	ind_CH3COCHCO) = c_air(:) * zmrbc(:	idt_CH3COCHCO)
Conc(:	ind_BZBIPERO2) = c_air(:) * zmrbc(:	idt_BZBIPERO2)
Conc(:	ind_MVKNO3) = c_air(:) * zmrbc(:	idt_MVKNO3)
Conc(:	ind_C5CO14OH) = c_air(:) * zmrbc(:	idt_C5CO14OH)
Conc(:	ind_ALCOCH2OOH) = c_air(:) * zmrbc(:	idt_ALCOCH2OOH)
Conc(:	ind_NORPINAL) = c_air(:) * zmrbc(:	idt_NORPINAL)
Conc(:	ind_LBUT1ENO2) = c_air(:) * zmrbc(:	idt_LBUT1ENO2)
Conc(:	ind_NNCATECO2) = c_air(:) * zmrbc(:	idt_NNCATECO2)
Conc(:	ind_MALDALCO2H) = c_air(:) * zmrbc(:	idt_MALDALCO2H)
Conc(:	ind_MCATEC1O2) = c_air(:) * zmrbc(:	idt_MCATEC1O2)
Conc(:	ind_OXYL1O2) = c_air(:) * zmrbc(:	idt_OXYL1O2)
Conc(:	ind_C59O2) = c_air(:) * zmrbc(:	idt_C59O2)
Conc(:	ind_MACROOH) = c_air(:) * zmrbc(:	idt_MACROOH)
Conc(:	ind_CO23C3CHO) = c_air(:) * zmrbc(:	idt_CO23C3CHO)
Conc(:	ind_NCATECO2) = c_air(:) * zmrbc(:	idt_NCATECO2)
Conc(:	ind_C3DIALO2) = c_air(:) * zmrbc(:	idt_C3DIALO2)
Conc(:	ind_CATEC1O2) = c_air(:) * zmrbc(:	idt_CATEC1O2)
Conc(:	ind_LISOPACO2) = c_air(:) * zmrbc(:	idt_LISOPACO2)
Conc(:	ind_DMS) = c_air(:) * zmrbc(:	idt_DMS)
Conc(:	ind_SO2) = c_air(:) * zmrbc(:	idt_SO2)
Conc(:	ind_BZEPOXMUC) = c_air(:) * zmrbc(:	idt_BZEPOXMUC)
Conc(:	ind_CH2CO) = c_air(:) * zmrbc(:	idt_CH2CO)
Conc(:	ind_LISOPACNO3O2) = c_air(:) * zmrbc(:	idt_LISOPACNO3O2)
Conc(:	ind_HOCH2CO) = c_air(:) * zmrbc(:	idt_HOCH2CO)
Conc(:	ind_BENZAL) = c_air(:) * zmrbc(:	idt_BENZAL)
Conc(:	ind_C6H5O2) = c_air(:) * zmrbc(:	idt_C6H5O2)
Conc(:	ind_NOA) = c_air(:) * zmrbc(:	idt_NOA)
Conc(:	ind_NO3CH2CHO) = c_air(:) * zmrbc(:	idt_NO3CH2CHO)
Conc(:	ind_ACCOMECHO) = c_air(:) * zmrbc(:	idt_ACCOMECHO)
Conc(:	ind_TLEPOXMUC) = c_air(:) * zmrbc(:	idt_TLEPOXMUC)
Conc(:	ind_EPXDLCO3) = c_air(:) * zmrbc(:	idt_EPXDLCO3)
Conc(:	ind_BUT2OLO2) = c_air(:) * zmrbc(:	idt_BUT2OLO2)
Conc(:	ind_CATEC1O) = c_air(:) * zmrbc(:	idt_CATEC1O)
Conc(:	ind_NDNCRESO2) = c_air(:) * zmrbc(:	idt_NDNCRESO2)
Conc(:	ind_MECOACETO2) = c_air(:) * zmrbc(:	idt_MECOACETO2)
Conc(:	ind_HCOCH2CO3) = c_air(:) * zmrbc(:	idt_HCOCH2CO3)
Conc(:	ind_TLEMUCO2) = c_air(:) * zmrbc(:	idt_TLEMUCO2)
Conc(:	ind_EPXC4DIAL) = c_air(:) * zmrbc(:	idt_EPXC4DIAL)
Conc(:	ind_HCOCO) = c_air(:) * zmrbc(:	idt_HCOCO)
Conc(:	ind_PHENO2) = c_air(:) * zmrbc(:	idt_PHENO2)
Conc(:	ind_TLBIPERO2) = c_air(:) * zmrbc(:	idt_TLBIPERO2)
Conc(:	ind_H2O2) = c_air(:) * zmrbc(:	idt_H2O2)
Conc(:	ind_CO2C3CHO) = c_air(:) * zmrbc(:	idt_CO2C3CHO)
Conc(:	ind_CH3OH) = c_air(:) * zmrbc(:	idt_CH3OH)
Conc(:	ind_LISOPEFO2) = c_air(:) * zmrbc(:	idt_LISOPEFO2)
Conc(:	ind_NOPINDO2) = c_air(:) * zmrbc(:	idt_NOPINDO2)
Conc(:	ind_CO2H3CO3) = c_air(:) * zmrbc(:	idt_CO2H3CO3)
Conc(:	ind_C2H5O2) = c_air(:) * zmrbc(:	idt_C2H5O2)
Conc(:	ind_NDNPHENO2) = c_air(:) * zmrbc(:	idt_NDNPHENO2)
Conc(:	ind_C2H5CO3) = c_air(:) * zmrbc(:	idt_C2H5CO3)
Conc(:	ind_TOL1OHNO2) = c_air(:) * zmrbc(:	idt_TOL1OHNO2)
Conc(:	ind_BZFUONE) = c_air(:) * zmrbc(:	idt_BZFUONE)
Conc(:	ind_MCATEC1O) = c_air(:) * zmrbc(:	idt_MCATEC1O)
Conc(:	ind_HOOCH2CO3) = c_air(:) * zmrbc(:	idt_HOOCH2CO3)
Conc(:	ind_C2H4) = c_air(:) * zmrbc(:	idt_C2H4)
Conc(:	ind_MALANHYO2) = c_air(:) * zmrbc(:	idt_MALANHYO2)
Conc(:	ind_MALDIALCO3) = c_air(:) * zmrbc(:	idt_MALDIALCO3)
Conc(:	ind_CBUT2ENE) = c_air(:) * zmrbc(:	idt_CBUT2ENE)
Conc(:	ind_TBUT2ENE) = c_air(:) * zmrbc(:	idt_TBUT2ENE)
Conc(:	ind_CH3CHOHO2) = c_air(:) * zmrbc(:	idt_CH3CHOHO2)
Conc(:	ind_CH4) = c_air(:) * zmrbc(:	idt_CH4)
Conc(:	ind_HCOCO2H) = c_air(:) * zmrbc(:	idt_HCOCO2H)
Conc(:	ind_HOCH2O2) = c_air(:) * zmrbc(:	idt_HOCH2O2)
Conc(:	ind_HOOCH2CHO) = c_air(:) * zmrbc(:	idt_HOOCH2CHO)
Conc(:	ind_C86O2) = c_air(:) * zmrbc(:	idt_C86O2)
Conc(:	ind_TLFUONE) = c_air(:) * zmrbc(:	idt_TLFUONE)
Conc(:	ind_C2H5CHO) = c_air(:) * zmrbc(:	idt_C2H5CHO)
Conc(:	ind_HOC6H4NO2) = c_air(:) * zmrbc(:	idt_HOC6H4NO2)
Conc(:	ind_ClO) = c_air(:) * zmrbc(:	idt_ClO)
Conc(:	ind_C5CO14O2) = c_air(:) * zmrbc(:	idt_C5CO14O2)
Conc(:	ind_MALDIAL) = c_air(:) * zmrbc(:	idt_MALDIAL)
Conc(:	ind_MACO3) = c_air(:) * zmrbc(:	idt_MACO3)
Conc(:	ind_H) = c_air(:) * zmrbc(:	idt_H)
Conc(:	ind_MACRO2) = c_air(:) * zmrbc(:	idt_MACRO2)
Conc(:	ind_CH3COCO2H) = c_air(:) * zmrbc(:	idt_CH3COCO2H)
Conc(:	ind_CHOCOCH2O2) = c_air(:) * zmrbc(:	idt_CHOCOCH2O2)
Conc(:	ind_HCOCO3) = c_air(:) * zmrbc(:	idt_HCOCO3)
Conc(:	ind_ISOPDO2) = c_air(:) * zmrbc(:	idt_ISOPDO2)
Conc(:	ind_C5H8) = c_air(:) * zmrbc(:	idt_C5H8)
Conc(:	ind_NC4CHO) = c_air(:) * zmrbc(:	idt_NC4CHO)
Conc(:	ind_C3H6) = c_air(:) * zmrbc(:	idt_C3H6)
Conc(:	ind_ISOPBDNO3O2) = c_air(:) * zmrbc(:	idt_ISOPBDNO3O2)
Conc(:	ind_CH3CO3) = c_air(:) * zmrbc(:	idt_CH3CO3)
Conc(:	ind_C5DICARB) = c_air(:) * zmrbc(:	idt_C5DICARB)
Conc(:	ind_NOPINOO) = c_air(:) * zmrbc(:	idt_NOPINOO)
Conc(:	ind_LHMVKABO2) = c_air(:) * zmrbc(:	idt_LHMVKABO2)
Conc(:	ind_CO2H3CHO) = c_air(:) * zmrbc(:	idt_CO2H3CHO)
Conc(:	ind_MACR) = c_air(:) * zmrbc(:	idt_MACR)
Conc(:	ind_DB2O2) = c_air(:) * zmrbc(:	idt_DB2O2)
Conc(:	ind_HNO3) = c_air(:) * zmrbc(:	idt_HNO3)
Conc(:	ind_HMAC) = c_air(:) * zmrbc(:	idt_HMAC)
Conc(:	ind_ACETOL) = c_air(:) * zmrbc(:	idt_ACETOL)
Conc(:	ind_C4MDIAL) = c_air(:) * zmrbc(:	idt_C4MDIAL)
Conc(:	ind_MGLYOX) = c_air(:) * zmrbc(:	idt_MGLYOX)
Conc(:	ind_ISOPBO2) = c_air(:) * zmrbc(:	idt_ISOPBO2)
Conc(:	ind_GLYOX) = c_air(:) * zmrbc(:	idt_GLYOX)
Conc(:	ind_LISOPACNO3) = c_air(:) * zmrbc(:	idt_LISOPACNO3)
Conc(:	ind_HOCH2CO3) = c_air(:) * zmrbc(:	idt_HOCH2CO3)
Conc(:	ind_ISOPDOOH) = c_air(:) * zmrbc(:	idt_ISOPDOOH)
Conc(:	ind_HOCH2CH2O2) = c_air(:) * zmrbc(:	idt_HOCH2CH2O2)
Conc(:	ind_ISOPBOOH) = c_air(:) * zmrbc(:	idt_ISOPBOOH)
Conc(:	ind_MVK) = c_air(:) * zmrbc(:	idt_MVK)
Conc(:	ind_CH3COCH2O2) = c_air(:) * zmrbc(:	idt_CH3COCH2O2)
Conc(:	ind_LZCODC23DBCOOH) = c_air(:) * zmrbc(:	idt_LZCODC23DBCOOH)
Conc(:	ind_HCOCH2O2) = c_air(:) * zmrbc(:	idt_HCOCH2O2)
Conc(:	ind_CH3CHO) = c_air(:) * zmrbc(:	idt_CH3CHO)
Conc(:	ind_HOCH2CHO) = c_air(:) * zmrbc(:	idt_HOCH2CHO)
Conc(:	ind_CH3CO) = c_air(:) * zmrbc(:	idt_CH3CO)
Conc(:	ind_C89CO3) = c_air(:) * zmrbc(:	idt_C89CO3)
Conc(:	ind_HCOOH) = c_air(:) * zmrbc(:	idt_HCOOH)
Conc(:	ind_O1D) = c_air(:) * zmrbc(:	idt_O1D)
Conc(:	ind_BrO) = c_air(:) * zmrbc(:	idt_BrO)
Conc(:	ind_CH3O) = c_air(:) * zmrbc(:	idt_CH3O)
Conc(:	ind_Br) = c_air(:) * zmrbc(:	idt_Br)
Conc(:	ind_CH2OO) = c_air(:) * zmrbc(:	idt_CH2OO)
Conc(:	ind_NO3) = c_air(:) * zmrbc(:	idt_NO3)
Conc(:	ind_NO) = c_air(:) * zmrbc(:	idt_NO)
Conc(:	ind_CO) = c_air(:) * zmrbc(:	idt_CO)
Conc(:	ind_NO2) = c_air(:) * zmrbc(:	idt_NO2)
Conc(:	ind_CH3O2) = c_air(:) * zmrbc(:	idt_CH3O2)
Conc(:	ind_O3P) = c_air(:) * zmrbc(:	idt_O3P)
Conc(:	ind_O3) = c_air(:) * zmrbc(:	idt_O3)
Conc(:	ind_HCHO) = c_air(:) * zmrbc(:	idt_HCHO)
Conc(:	ind_CH3) = c_air(:) * zmrbc(:	idt_CH3)
Conc(:	ind_OH) = c_air(:) * zmrbc(:	idt_OH)
Conc(:	ind_HO2) = c_air(:) * zmrbc(:	idt_HO2)
Conc(:	ind_O2) = c_air(:) * zmrbc(:	idt_O2)
Conc(:	ind_N2) = c_air(:) * zmrbc(:	idt_N2)
Conc(:	ind_CO2) = c_air(:) * zmrbc(:	idt_CO2)
