# Supplementary material for: Oxidation of low-molecular weight organic compounds in clouddroplets: development of the JAMOC chemical mechanism inCAABA/MECCA (version 4.5.0gmdd)
Source: Copernicus journal article supplement (doi:10.5194/gmd-2020-337), 2020-10-29
Supplement: Supplementary file 20 [file gmd-2020-337-supplement.zip › caaba_4.5.0gmdd/mecca/process_aqueous.tbl]

# -*- org -*-
|-----------+---------+--------------+---------+---------+--------+--------------+----------+-----------+---------+----------+--------+--------+-------+-------------+-------------+--------------+----------+---------+--------+-------|
| basename  | subname | standardname | refspec | medium  | R_vini | I_force_init | I_advect | I_convect | I_vdiff | I_drydep | I_sedi | I_scav | I_mix | I_force_col | I_integrate | I_timefilter | I_method | S_model | I_mode | I_sol |
|-----------+---------+--------------+---------+---------+--------+--------------+----------+-----------+---------+----------+--------+--------+-------+-------------+-------------+--------------+----------+---------+--------+-------|
| O2        | a##     |              |         | AEROSOL |        |              | ON       | ON        | ON      | ON       | ON     | ON     |       |             |             |              | METHD    | MODEL   | m(##)  |       |
| O3        | a##     |              |         | AEROSOL |        |              | ON       | ON        | ON      | ON       | ON     | ON     |       |             |             |              | METHD    | MODEL   | m(##)  |       |
|-----------+---------+--------------+---------+---------+--------+--------------+----------+-----------+---------+----------+--------+--------+-------+-------------+-------------+--------------+----------+---------+--------+-------|
| OH        | a##     |              |         | AEROSOL |        |              | OFF      | OFF       | OFF     | ON       | ON     | ON     |       |             |             |              | METHD    | MODEL   | m(##)  |       |
| HO2       | a##     |              |         | AEROSOL |        |              | OFF      | OFF       | OFF     | ON       | ON     | ON     |       |             |             |              | METHD    | MODEL   | m(##)  |       |
| H2O2      | a##     |              |         | AEROSOL |        |              | ON       | ON        | ON      | ON       | ON     | ON     |       |             |             |              | METHD    | MODEL   | m(##)  |       |
|-----------+---------+--------------+---------+---------+--------+--------------+----------+-----------+---------+----------+--------+--------+-------+-------------+-------------+--------------+----------+---------+--------+-------|
| HNO3      | a##     |              |         | AEROSOL |        |              | ON       | ON        | ON      | ON       | ON     | ON     |       |             |             |              | METHD    | MODEL   | m(##)  |       |
| HNO4      | a##     |              |         | AEROSOL |        |              | ON       | ON        | ON      | ON       | ON     | ON     |       |             |             |              | METHD    | MODEL   | m(##)  |       |
| HONO      | a##     |              |         | AEROSOL |        |              | ON       | ON        | ON      | ON       | ON     | ON     |       |             |             |              | METHD    | MODEL   | m(##)  |       |
| NH3       | a##     |              |         | AEROSOL |        |              | ON       | ON        | ON      | ON       | ON     | ON     |       |             |             |              | METHD    | MODEL   | m(##)  |       |
| NO2       | a##     |              |         | AEROSOL |        |              | OFF      | OFF       | OFF     | ON       | ON     | ON     |       |             |             |              | METHD    | MODEL   | m(##)  |       |
| NO3       | a##     |              |         | AEROSOL |        |              | OFF      | OFF       | OFF     | ON       | ON     | ON     |       |             |             |              | METHD    | MODEL   | m(##)  |       |
|-----------+---------+--------------+---------+---------+--------+--------------+----------+-----------+---------+----------+--------+--------+-------+-------------+-------------+--------------+----------+---------+--------+-------|
| CH3OH     | a##     |              |         | AEROSOL |        |              | ON       | ON        | ON      | ON       | ON     | ON     |       |             |             |              | METHD    | MODEL   | m(##)  |       |
| CH3O2     | a##     |              |         | AEROSOL |        |              | OFF      | OFF       | OFF     | ON       | ON     | ON     |       |             |             |              | METHD    | MODEL   | m(##)  |       |
| CH3OOH    | a##     |              |         | AEROSOL |        |              | ON       | ON        | ON      | ON       | ON     | ON     |       |             |             |              | METHD    | MODEL   | m(##)  |       |
| CO2       | a##     |              |         | AEROSOL |        |              | ON       | ON        | ON      | ON       | ON     | ON     |       |             |             |              | METHD    | MODEL   | m(##)  |       |
| HCHO      | a##     |              |         | AEROSOL |        |              | ON       | ON        | ON      | ON       | ON     | ON     |       |             |             |              | METHD    | MODEL   | m(##)  |       |
| HCOOH     | a##     |              |         | AEROSOL |        |              | ON       | ON        | ON      | ON       | ON     | ON     |       |             |             |              | METHD    | MODEL   | m(##)  |       |
|-----------+---------+--------------+---------+---------+--------+--------------+----------+-----------+---------+----------+--------+--------+-------+-------------+-------------+--------------+----------+---------+--------+-------|
| Cl        | a##     |              |         | AEROSOL |        |              | OFF      | OFF       | OFF     | ON       | ON     | ON     |       |             |             |              | METHD    | MODEL   | m(##)  |       |
| Cl2       | a##     |              |         | AEROSOL |        |              | ON       | ON        | ON      | ON       | ON     | ON     |       |             |             |              | METHD    | MODEL   | m(##)  |       |
| HCl       | a##     |              |         | AEROSOL |        |              | ON       | ON        | ON      | ON       | ON     | ON     |       |             |             |              | METHD    | MODEL   | m(##)  |       |
| HOCl      | a##     |              |         | AEROSOL |        |              | ON       | ON        | ON      | ON       | ON     | ON     |       |             |             |              | METHD    | MODEL   | m(##)  |       |
|-----------+---------+--------------+---------+---------+--------+--------------+----------+-----------+---------+----------+--------+--------+-------+-------------+-------------+--------------+----------+---------+--------+-------|
| Br        | a##     |              |         | AEROSOL |        |              | OFF      | OFF       | OFF     | ON       | ON     | ON     |       |             |             |              | METHD    | MODEL   | m(##)  |       |
| Br2       | a##     |              |         | AEROSOL |        |              | ON       | ON        | ON      | ON       | ON     | ON     |       |             |             |              | METHD    | MODEL   | m(##)  |       |
| BrCl      | a##     |              |         | AEROSOL |        |              | ON       | ON        | ON      | ON       | ON     | ON     |       |             |             |              | METHD    | MODEL   | m(##)  |       |
| HBr       | a##     |              |         | AEROSOL |        |              | ON       | ON        | ON      | ON       | ON     | ON     |       |             |             |              | METHD    | MODEL   | m(##)  |       |
| HOBr      | a##     |              |         | AEROSOL |        |              | ON       | ON        | ON      | ON       | ON     | ON     |       |             |             |              | METHD    | MODEL   | m(##)  |       |
|-----------+---------+--------------+---------+---------+--------+--------------+----------+-----------+---------+----------+--------+--------+-------+-------------+-------------+--------------+----------+---------+--------+-------|
| HOI       | a##     |              |         | AEROSOL |        |              | ON       | ON        | ON      | ON       | ON     | ON     |       |             |             |              | METHD    | MODEL   | m(##)  |       |
| I2        | a##     |              |         | AEROSOL |        |              | ON       | ON        | ON      | ON       | ON     | ON     |       |             |             |              | METHD    | MODEL   | m(##)  |       |
| IBr       | a##     |              |         | AEROSOL |        |              | ON       | ON        | ON      | ON       | ON     | ON     |       |             |             |              | METHD    | MODEL   | m(##)  |       |
| ICl       | a##     |              |         | AEROSOL |        |              | ON       | ON        | ON      | ON       | ON     | ON     |       |             |             |              | METHD    | MODEL   | m(##)  |       |
| IO        | a##     |              |         | AEROSOL |        |              | OFF      | OFF       | OFF     | ON       | ON     | ON     |       |             |             |              | METHD    | MODEL   | m(##)  |       |
|-----------+---------+--------------+---------+---------+--------+--------------+----------+-----------+---------+----------+--------+--------+-------+-------------+-------------+--------------+----------+---------+--------+-------|
| DMSO      | a##     |              |         | AEROSOL |        |              | ON       | ON        | ON      | ON       | ON     | ON     |       |             |             |              | METHD    | MODEL   | m(##)  |       |
| SO2       | a##     |              |         | AEROSOL |        |              | ON       | ON        | ON      | ON       | ON     | ON     |       |             |             |              | METHD    | MODEL   | m(##)  |       |
| H2SO4     | a##     |              |         | AEROSOL |        |              | ON       | ON        | ON      | ON       | ON     | ON     |       |             |             |              | METHD    | MODEL   | m(##)  |       |
|-----------+---------+--------------+---------+---------+--------+--------------+----------+-----------+---------+----------+--------+--------+-------+-------------+-------------+--------------+----------+---------+--------+-------|
| Hg        | a##     |              |         | AEROSOL |        |              | ON       | ON        | ON      | ON       | ON     | ON     |       |             |             |              | METHD    | MODEL   | m(##)  |       |
| HgO       | a##     |              |         | AEROSOL |        |              | ON       | ON        | ON      | ON       | ON     | ON     |       |             |             |              | METHD    | MODEL   | m(##)  |       |
| HgOH      | a##     |              |         | AEROSOL |        |              | ON       | ON        | ON      | ON       | ON     | ON     |       |             |             |              | METHD    | MODEL   | m(##)  |       |
| HgOHOH    | a##     |              |         | AEROSOL |        |              | ON       | ON        | ON      | ON       | ON     | ON     |       |             |             |              | METHD    | MODEL   | m(##)  |       |
| HgOHCl    | a##     |              |         | AEROSOL |        |              | ON       | ON        | ON      | ON       | ON     | ON     |       |             |             |              | METHD    | MODEL   | m(##)  |       |
| HgCl2     | a##     |              |         | AEROSOL |        |              | ON       | ON        | ON      | ON       | ON     | ON     |       |             |             |              | METHD    | MODEL   | m(##)  |       |
| HgBr2     | a##     |              |         | AEROSOL |        |              | ON       | ON        | ON      | ON       | ON     | ON     |       |             |             |              | METHD    | MODEL   | m(##)  |       |
| HgSO3     | a##     |              |         | AEROSOL |        |              | ON       | ON        | ON      | ON       | ON     | ON     |       |             |             |              | METHD    | MODEL   | m(##)  |       |
| ClHgBr    | a##     |              |         | AEROSOL |        |              | ON       | ON        | ON      | ON       | ON     | ON     |       |             |             |              | METHD    | MODEL   | m(##)  |       |
| BrHgOBr   | a##     |              |         | AEROSOL |        |              | ON       | ON        | ON      | ON       | ON     | ON     |       |             |             |              | METHD    | MODEL   | m(##)  |       |
| ClHgOBr   | a##     |              |         | AEROSOL |        |              | ON       | ON        | ON      | ON       | ON     | ON     |       |             |             |              | METHD    | MODEL   | m(##)  |       |
|-----------+---------+--------------+---------+---------+--------+--------------+----------+-----------+---------+----------+--------+--------+-------+-------------+-------------+--------------+----------+---------+--------+-------|
| O2m       | a##     |              |         | AEROSOL |        |              | OFF      | OFF       | OFF     | ON       | ON     | ON     |       |             |             |              | METHD    | MODEL   | m(##)  |       |
|-----------+---------+--------------+---------+---------+--------+--------------+----------+-----------+---------+----------+--------+--------+-------+-------------+-------------+--------------+----------+---------+--------+-------|
| Hp        | a##     |              |         | AEROSOL |        |              | ON       | ON        | ON      | ON       | ON     | ON     |       |             |             |              | METHD    | MODEL   | m(##)  |       |
| OHm       | a##     |              |         | AEROSOL |        |              | ON       | ON        | ON      | ON       | ON     | ON     |       |             |             |              | METHD    | MODEL   | m(##)  |       |
|-----------+---------+--------------+---------+---------+--------+--------------+----------+-----------+---------+----------+--------+--------+-------+-------------+-------------+--------------+----------+---------+--------+-------|
| NH4p      | a##     |              |         | AEROSOL |        |              | ON       | ON        | ON      | ON       | ON     | ON     |       |             |             |              | METHD    | MODEL   | m(##)  |       |
| NO2m      | a##     |              |         | AEROSOL |        |              | ON       | ON        | ON      | ON       | ON     | ON     |       |             |             |              | METHD    | MODEL   | m(##)  |       |
| NO3m      | a##     |              |         | AEROSOL |        |              | ON       | ON        | ON      | ON       | ON     | ON     |       |             |             |              | METHD    | MODEL   | m(##)  |       |
| NO4m      | a##     |              |         | AEROSOL |        |              | ON       | ON        | ON      | ON       | ON     | ON     |       |             |             |              | METHD    | MODEL   | m(##)  |       |
|-----------+---------+--------------+---------+---------+--------+--------------+----------+-----------+---------+----------+--------+--------+-------+-------------+-------------+--------------+----------+---------+--------+-------|
| CO3m      | a##     |              |         | AEROSOL |        |              | OFF      | OFF       | OFF     | ON       | ON     | ON     |       |             |             |              | METHD    | MODEL   | m(##)  |       |
| HCO3m     | a##     |              |         | AEROSOL |        |              | ON       | ON        | ON      | ON       | ON     | ON     |       |             |             |              | METHD    | MODEL   | m(##)  |       |
| HCOOm     | a##     |              |         | AEROSOL |        |              | ON       | ON        | ON      | ON       | ON     | ON     |       |             |             |              | METHD    | MODEL   | m(##)  |       |
|-----------+---------+--------------+---------+---------+--------+--------------+----------+-----------+---------+----------+--------+--------+-------+-------------+-------------+--------------+----------+---------+--------+-------|
| Clm       | a##     |              |         | AEROSOL |        |              | ON       | ON        | ON      | ON       | ON     | ON     |       |             |             |              | METHD    | MODEL   | m(##)  |       |
| Cl2m      | a##     |              |         | AEROSOL |        |              | OFF      | OFF       | OFF     | ON       | ON     | ON     |       |             |             |              | METHD    | MODEL   | m(##)  |       |
| ClOm      | a##     |              |         | AEROSOL |        |              | ON       | ON        | ON      | ON       | ON     | ON     |       |             |             |              | METHD    | MODEL   | m(##)  |       |
| ClOHm     | a##     |              |         | AEROSOL |        |              | OFF      | OFF       | OFF     | ON       | ON     | ON     |       |             |             |              | METHD    | MODEL   | m(##)  |       |
|-----------+---------+--------------+---------+---------+--------+--------------+----------+-----------+---------+----------+--------+--------+-------+-------------+-------------+--------------+----------+---------+--------+-------|
| Brm       | a##     |              |         | AEROSOL |        |              | ON       | ON        | ON      | ON       | ON     | ON     |       |             |             |              | METHD    | MODEL   | m(##)  |       |
| Br2m      | a##     |              |         | AEROSOL |        |              | OFF      | OFF       | OFF     | ON       | ON     | ON     |       |             |             |              | METHD    | MODEL   | m(##)  |       |
| Br2Clm    | a##     |              |         | AEROSOL |        |              | OFF      | OFF       | OFF     | ON       | ON     | ON     |       |             |             |              | METHD    | MODEL   | m(##)  |       |
| BrCl2m    | a##     |              |         | AEROSOL |        |              | OFF      | OFF       | OFF     | ON       | ON     | ON     |       |             |             |              | METHD    | MODEL   | m(##)  |       |
| BrOm      | a##     |              |         | AEROSOL |        |              | ON       | ON        | ON      | ON       | ON     | ON     |       |             |             |              | METHD    | MODEL   | m(##)  |       |
| BrOHm     | a##     |              |         | AEROSOL |        |              | OFF      | OFF       | OFF     | ON       | ON     | ON     |       |             |             |              | METHD    | MODEL   | m(##)  |       |
|-----------+---------+--------------+---------+---------+--------+--------------+----------+-----------+---------+----------+--------+--------+-------+-------------+-------------+--------------+----------+---------+--------+-------|
| Im        | a##     |              |         | AEROSOL |        |              | ON       | ON        | ON      | ON       | ON     | ON     |       |             |             |              | METHD    | MODEL   | m(##)  |       |
| IBr2m     | a##     |              |         | AEROSOL |        |              | OFF      | OFF       | OFF     | ON       | ON     | ON     |       |             |             |              | METHD    | MODEL   | m(##)  |       |
| ICl2m     | a##     |              |         | AEROSOL |        |              | OFF      | OFF       | OFF     | ON       | ON     | ON     |       |             |             |              | METHD    | MODEL   | m(##)  |       |
| IClBrm    | a##     |              |         | AEROSOL |        |              | OFF      | OFF       | OFF     | ON       | ON     | ON     |       |             |             |              | METHD    | MODEL   | m(##)  |       |
| IO2m      | a##     |              |         | AEROSOL |        |              | ON       | ON        | ON      | ON       | ON     | ON     |       |             |             |              | METHD    | MODEL   | m(##)  |       |
| IO3m      | a##     |              |         | AEROSOL |        |              | ON       | ON        | ON      | ON       | ON     | ON     |       |             |             |              | METHD    | MODEL   | m(##)  |       |
|-----------+---------+--------------+---------+---------+--------+--------------+----------+-----------+---------+----------+--------+--------+-------+-------------+-------------+--------------+----------+---------+--------+-------|
| CH2OHSO3m | a##     |              |         | AEROSOL |        |              | ON       | ON        | ON      | ON       | ON     | ON     |       |             |             |              | METHD    | MODEL   | m(##)  |       |
| CH3SO3m   | a##     |              |         | AEROSOL |        |              | ON       | ON        | ON      | ON       | ON     | ON     |       |             |             |              | METHD    | MODEL   | m(##)  |       |
| HSO3m     | a##     |              |         | AEROSOL |        |              | ON       | ON        | ON      | ON       | ON     | ON     |       |             |             |              | METHD    | MODEL   | m(##)  |       |
| HSO4m     | a##     |              |         | AEROSOL |        |              | ON       | ON        | ON      | ON       | ON     | ON     |       |             |             |              | METHD    | MODEL   | m(##)  |       |
| HSO5m     | a##     |              |         | AEROSOL |        |              | ON       | ON        | ON      | ON       | ON     | ON     |       |             |             |              | METHD    | MODEL   | m(##)  |       |
| SO3m      | a##     |              |         | AEROSOL |        |              | OFF      | OFF       | OFF     | ON       | ON     | ON     |       |             |             |              | METHD    | MODEL   | m(##)  |       |
| SO3mm     | a##     |              |         | AEROSOL |        |              | ON       | ON        | ON      | ON       | ON     | ON     |       |             |             |              | METHD    | MODEL   | m(##)  |       |
| SO4m      | a##     |              |         | AEROSOL |        |              | OFF      | OFF       | OFF     | ON       | ON     | ON     |       |             |             |              | METHD    | MODEL   | m(##)  |       |
| SO4mm     | a##     |              |         | AEROSOL |        |              | ON       | ON        | ON      | ON       | ON     | ON     |       |             |             |              | METHD    | MODEL   | m(##)  |       |
| SO5m      | a##     |              |         | AEROSOL |        |              | OFF      | OFF       | OFF     | ON       | ON     | ON     |       |             |             |              | METHD    | MODEL   | m(##)  |       |
|-----------+---------+--------------+---------+---------+--------+--------------+----------+-----------+---------+----------+--------+--------+-------+-------------+-------------+--------------+----------+---------+--------+-------|
| Hgp       | a##     |              |         | AEROSOL |        |              | ON       | ON        | ON      | ON       | ON     | ON     |       |             |             |              | METHD    | MODEL   | m(##)  |       |
| Hgpp      | a##     |              |         | AEROSOL |        |              | ON       | ON        | ON      | ON       | ON     | ON     |       |             |             |              | METHD    | MODEL   | m(##)  |       |
| HgOHp     | a##     |              |         | AEROSOL |        |              | ON       | ON        | ON      | ON       | ON     | ON     |       |             |             |              | METHD    | MODEL   | m(##)  |       |
| HgClp     | a##     |              |         | AEROSOL |        |              | ON       | ON        | ON      | ON       | ON     | ON     |       |             |             |              | METHD    | MODEL   | m(##)  |       |
| HgCl3m    | a##     |              |         | AEROSOL |        |              | ON       | ON        | ON      | ON       | ON     | ON     |       |             |             |              | METHD    | MODEL   | m(##)  |       |
| HgCl4mm   | a##     |              |         | AEROSOL |        |              | ON       | ON        | ON      | ON       | ON     | ON     |       |             |             |              | METHD    | MODEL   | m(##)  |       |
| HgBrp     | a##     |              |         | AEROSOL |        |              | ON       | ON        | ON      | ON       | ON     | ON     |       |             |             |              | METHD    | MODEL   | m(##)  |       |
| HgBr3m    | a##     |              |         | AEROSOL |        |              | ON       | ON        | ON      | ON       | ON     | ON     |       |             |             |              | METHD    | MODEL   | m(##)  |       |
| HgBr4mm   | a##     |              |         | AEROSOL |        |              | ON       | ON        | ON      | ON       | ON     | ON     |       |             |             |              | METHD    | MODEL   | m(##)  |       |
| HgSO32mm  | a##     |              |         | AEROSOL |        |              | ON       | ON        | ON      | ON       | ON     | ON     |       |             |             |              | METHD    | MODEL   | m(##)  |       |
|-----------+---------+--------------+---------+---------+--------+--------------+----------+-----------+---------+----------+--------+--------+-------+-------------+-------------+--------------+----------+---------+--------+-------|
| Nap       | a##     |              |         | AEROSOL |        |              | ON       | ON        | ON      | ON       | ON     | ON     |       |             |             |              | METHD    | MODEL   | m(##)  |       |
|-----------+---------+--------------+---------+---------+--------+--------------+----------+-----------+---------+----------+--------+--------+-------+-------------+-------------+--------------+----------+---------+--------+-------|
