# Supplementary material for: Oxidation of low-molecular weight organic compounds in clouddroplets: development of the JAMOC chemical mechanism inCAABA/MECCA (version 4.5.0gmdd)
Source: Copernicus journal article supplement (doi:10.5194/gmd-2020-337), 2020-10-29
Supplement: Supplementary file 20 [file gmd-2020-337-supplement.zip › caaba_4.5.0gmdd/mecca/process_gas.tbl]

# -*- org -*-
# Time-stamp: <2019-07-15 20:55:27 sander>

# when adding/deleting/modifying a TRACER entry, the following changes
# are necessary:
#
# - process_gas.tbl, process_aqueous.tbl: add/delete/modify columns
#
# - xpolymecca, template_messy_mecca_poly_si.f90: update "USE
#   messy_main_tracer, ONLY:" in SUBROUTINE mecca_new_tracer_gp
#
# - tracdef_tbl.awk: update makesettracer; maybe adjust optional
#   parameters
#
# - xmecca:
#   - update line that adds diagnostic tracer to $diagtractblfile
#   - adjust gawk command that adds products to equation file to
#     calculate # accumulated reaction rates

|-----------------+---------+--------------+---------+---------+------------+--------------+----------+-----------+---------+----------+--------+--------+-------+-------------+-------------+--------------+----------+----------+------------+-------|
| basename        | subname | standardname | refspec | medium  | R_vini     | I_force_init | I_advect | I_convect | I_vdiff | I_drydep | I_sedi | I_scav | I_mix | I_force_col | I_integrate | I_timefilter | I_method | S_model  | I_mode     | I_sol |
|-----------------+---------+--------------+---------+---------+------------+--------------+----------+-----------+---------+----------+--------+--------+-------+-------------+-------------+--------------+----------+----------+------------+-------|
| O1D             |         |              | O       | AIR     |            |              | OFF      | OFF       | OFF     |          |        | OFF    |       |             |             |              |          |          |            |       |
| O3P             |         |              | O       | AIR     |            |              | ON       | ON        | ON      |          |        | OFF    |       |             |             |              |          |          |            |       |
| O2              |         |              |         | AIR     | 0.21_dp    |              | OFF      | OFF       | OFF     |          |        | OFF    |       |             |             |              |          |          |            |       |
| O3              |         |              |         | AIR     |            |              | ON       | ON        | ON      | ON       |        | ON     |       |             |             |              |          |          |            |       |
|-----------------+---------+--------------+---------+---------+------------+--------------+----------+-----------+---------+----------+--------+--------+-------+-------------+-------------+--------------+----------+----------+------------+-------|
| O3s             |         |              | O3      | AIR     |            |              | ON       | ON        | ON      | ON       |        | ON     |       |             |             |              |          |          |            |       |
| LO3s            |         |              | O3      | AIR     |            |              | OFF      | OFF       | OFF     | OFF      |        | OFF    |       |             |             |              |          |          |            |       |
|-----------------+---------+--------------+---------+---------+------------+--------------+----------+-----------+---------+----------+--------+--------+-------+-------------+-------------+--------------+----------+----------+------------+-------|
| H               |         |              |         | AIR     |            |              | ON       | OFF       | OFF     |          |        | OFF    |       |             |             |              |          |          |            |       |
| H2              |         |              |         | AIR     |            |              | ON       | ON        | ON      |          |        | OFF    |       |             |             |              |          |          |            |       |
| OH              |         |              |         | AIR     |            |              | ON       | OFF       | OFF     |          |        | ON     |       |             |             |              |          |          |            |       |
| HO2             |         |              |         | AIR     |            |              | ON       | OFF       | OFF     | ON       |        | ON     |       |             |             |              |          |          |            |       |
| H2OH2O          |         |              |         | AIR     |            |              | OFF      | OFF       | OFF     |          |        | OFF    |       |             |             |              |          |          |            |       |
| H2O             |         |              |         | AIR     |            |              | ON       | ON        | ON      |          |        | OFF    |       |             |             |              |          |          |            |       |
| H2O2            |         |              |         | AIR     |            |              | ON       | ON        | ON      | ON       |        | ON     |       |             |             |              |          |          |            |       |
|-----------------+---------+--------------+---------+---------+------------+--------------+----------+-----------+---------+----------+--------+--------+-------+-------------+-------------+--------------+----------+----------+------------+-------|
| N               |         |              |         | AIR     |            |              | OFF      | OFF       | OFF     |          |        | OFF    |       |             |             |              |          |          |            |       |
| N2D             |         |              |         | AIR     |            |              | OFF      | OFF       | OFF     |          |        | OFF    |       |             |             |              |          |          |            |       |
| N2              |         |              |         | AIR     | 0.78_dp    |              | OFF      | OFF       | OFF     |          |        | OFF    |       |             |             |              |          |          |            |       |
| NH3             |         |              |         | AIR     |            |              | ON       | ON        | ON      | ON       |        | ON     |       |             |             |              |          |          |            |       |
| N2O             |         |              |         | AIR     |            |              | ON       | ON        | ON      |          |        | OFF    |       |             |             |              |          |          |            |       |
| NO              |         |              |         | AIR     |            |              | ON       | ON        | ON      | ON       |        | ON     |       |             |             |              |          |          |            |       |
| NO2             |         |              |         | AIR     |            |              | ON       | ON        | ON      | ON       |        | ON     |       |             |             |              |          |          |            |       |
| NO3             |         |              |         | AIR     |            |              | ON       | ON        | ON      | ON       |        | ON     |       |             |             |              |          |          |            |       |
| N2O5            |         |              |         | AIR     |            |              | ON       | ON        | ON      | ON       |        | ON     |       |             |             |              |          |          |            |       |
| HONO            |         |              |         | AIR     |            |              | ON       | ON        | ON      | ON       |        | ON     |       |             |             |              |          |          |            |       |
| HNO3            |         |              |         | AIR     |            |              | ON       | ON        | ON      | ON       |        | ON     |       |             |             |              |          |          |            |       |
| HNO4            |         |              |         | AIR     |            |              | ON       | ON        | ON      | ON       |        | ON     |       |             |             |              |          |          |            |       |
| NH2             |         |              |         | AIR     |            |              | ON       | ON        | ON      | OFF      |        | ON     |       |             |             |              |          |          |            |       |
| HNO             |         |              |         | AIR     |            |              | ON       | ON        | ON      | OFF      |        | ON     |       |             |             |              |          |          |            |       |
| NH2O            |         |              |         | AIR     |            |              | ON       | ON        | ON      | OFF      |        | ON     |       |             |             |              |          |          |            |       |
| NHOH            |         |              |         | AIR     |            |              | ON       | ON        | ON      | OFF      |        | ON     |       |             |             |              |          |          |            |       |
| NH2OH           |         |              |         | AIR     |            |              | ON       | ON        | ON      | OFF      |        | ON     |       |             |             |              |          |          |            |       |
| HOONO           |         |              |         | AIR     |            |              | ON       | ON        | ON      | ON       |        | ON     |       |             |             |              |          |          |            |       |
|-----------------+---------+--------------+---------+---------+------------+--------------+----------+-----------+---------+----------+--------+--------+-------+-------------+-------------+--------------+----------+----------+------------+-------|
| CH3O2           |         |              |         | AIR     |            |              | OFF      | OFF       | OFF     | ON       |        | ON     |       |             |             |              |          |          |            |       |
| CH3OH           |         |              |         | AIR     |            |              | ON       | ON        | ON      | ON       |        | ON     |       |             |             |              |          |          |            |       |
| CH3OOH          |         |              |         | AIR     |            |              | ON       | ON        | ON      | ON       |        | ON     |       |             |             |              |          |          |            |       |
| CH4             |         |              |         | AIR     |            |              | ON       | ON        | ON      |          |        | ON     |       |             |             |              |          |          |            |       |
| CO              |         |              |         | AIR     |            |              | ON       | ON        | ON      |          |        | OFF    |       |             |             |              |          |          |            |       |
| CO2             |         |              |         | AIR     | 3.5E-04_dp |              | ON       | ON        | ON      |          |        | ON     |       |             |             |              |          |          |            |       |
| HCHO            |         |              |         | AIR     |            |              | ON       | ON        | ON      | ON       |        | ON     |       |             |             |              |          |          |            |       |
| HCOOH           |         |              |         | AIR     |            |              | ON       | ON        | ON      | ON       |        | ON     |       |             |             |              |          |          |            |       |
| LCARBON         |         |              | C       | AIR     |            |              | OFF      | OFF       | OFF     |          |        |        |       |             |             |              |          |          |            |       |
| CH3O            |         |              |         | AIR     |            |              | OFF      | OFF       | OFF     |          |        | ON     |       |             |             |              |          |          |            |       |
| HOCH2O2         |         |              |         | AIR     |            |              | OFF      | OFF       | OFF     | ON       |        | ON     |       |             |             |              |          |          |            |       |
| HOCH2OOH        |         |              |         | AIR     |            |              | ON       | ON        | ON      | ON       |        | ON     |       |             |             |              |          |          |            |       |
| HOCH2OH         |         |              |         | AIR     |            |              | ON       | ON        | ON      | ON       |        | ON     |       |             |             |              |          |          |            |       |
| CH3NO3          |         |              |         | AIR     |            |              | ON       | ON        | ON      | ON       |        | ON     |       |             |             |              |          |          |            |       |
| CH3ONO          |         |              |         | AIR     |            |              | ON       | ON        | ON      | ON       |        | ON     |       |             |             |              |          |          |            |       |
| CH3O2NO2        |         |              |         | AIR     |            |              | ON       | ON        | ON      | ON       |        | ON     |       |             |             |              |          |          |            |       |
| CH2OO           |         |              |         | AIR     |            |              | OFF      | OFF       | OFF     |          |        | OFF    |       |             |             |              |          |          |            |       |
| CH2OOA          |         |              |         | AIR     |            |              | OFF      | OFF       | OFF     |          |        | OFF    |       |             |             |              |          |          |            |       |
| CH3             |         |              |         | AIR     |            |              | OFF      | OFF       | OFF     |          |        | OFF    |       |             |             |              |          |          |            |       |
| HOCH2O2NO2      |         |              |         | AIR     |            |              | ON       | ON        | ON      | ON       |        | ON     |       |             |             |              |          |          |            |       |
| CN              |         |              |         | AIR     |            |              | OFF      | OFF       | OFF     |          |        | OFF    |       |             |             |              |          |          |            |       |
| NCO             |         |              |         | AIR     |            |              | OFF      | OFF       | OFF     |          |        | OFF    |       |             |             |              |          |          |            |       |
| HCN             |         |              |         | AIR     |            |              | ON       | ON        | ON      | ON       |        | ON     |       |             |             |              |          |          |            |       |
|-----------------+---------+--------------+---------+---------+------------+--------------+----------+-----------+---------+----------+--------+--------+-------+-------------+-------------+--------------+----------+----------+------------+-------|
| C2H2            |         |              |         | AIR     |            |              | ON       | ON        | ON      |          |        | OFF    |       |             |             |              |          |          |            |       |
| C2H4            |         |              |         | AIR     |            |              | ON       | ON        | ON      |          |        | OFF    |       |             |             |              |          |          |            |       |
| C2H5O2          |         |              |         | AIR     |            |              | OFF      | OFF       | OFF     |          |        | OFF    |       |             |             |              |          |          |            |       |
| C2H5OH          |         |              |         | AIR     |            |              | ON       | ON        | ON      | ON       |        | ON     |       |             |             |              |          |          |            |       |
| C2H5OOH         |         |              |         | AIR     |            |              | ON       | ON        | ON      | ON       |        | ON     |       |             |             |              |          |          |            |       |
| C2H6            |         |              |         | AIR     |            |              | ON       | ON        | ON      |          |        | OFF    |       |             |             |              |          |          |            |       |
| CH3CHO          |         |              |         | AIR     |            |              | ON       | ON        | ON      | ON       |        | ON     |       |             |             |              |          |          |            |       |
| CH3CO2H         |         |              |         | AIR     |            |              | ON       | ON        | ON      | ON       |        | ON     |       |             |             |              |          |          |            |       |
| CH3CO3          |         |              |         | AIR     |            |              | OFF      | OFF       | OFF     |          |        | OFF    |       |             |             |              |          |          |            |       |
| CH3CO3H         |         |              |         | AIR     |            |              | ON       | ON        | ON      | ON       |        | ON     |       |             |             |              |          |          |            |       |
| ETHGLY          |         |              |         | AIR     |            |              | ON       | ON        | ON      | ON       |        | ON     |       |             |             |              |          |          |            |       |
| ETHOHNO3        |         |              |         | AIR     |            |              | ON       | ON        | ON      | ON       |        | ON     |       |             |             |              |          |          |            |       |
| GLYOX           |         |              |         | AIR     |            |              | ON       | ON        | ON      | ON       |        | ON     |       |             |             |              |          |          |            |       |
| HCOCO2H         |         |              |         | AIR     |            |              | ON       | ON        | ON      | ON       |        | ON     |       |             |             |              |          |          |            |       |
| HCOCO           |         |              |         | AIR     |            |              | OFF      | OFF       | OFF     |          |        | OFF    |       |             |             |              |          |          |            |       |
| HCOCO3          |         |              |         | AIR     |            |              | OFF      | OFF       | OFF     |          |        | OFF    |       |             |             |              |          |          |            |       |
| HCOCO3H         |         |              |         | AIR     |            |              | ON       | ON        | ON      | ON       |        | ON     |       |             |             |              |          |          |            |       |
| HOCH2CH2O       |         |              |         | AIR     |            |              | OFF      | OFF       | OFF     |          |        |        |       |             |             |              |          |          |            |       |
| HOCH2CH2O2      |         |              |         | AIR     |            |              | OFF      | OFF       | OFF     |          |        |        |       |             |             |              |          |          |            |       |
| HOCH2CHO        |         |              |         | AIR     |            |              | ON       | ON        | ON      | ON       |        | ON     |       |             |             |              |          |          |            |       |
| HOCH2CO2H       |         |              |         | AIR     |            |              | ON       | ON        | ON      | ON       |        | ON     |       |             |             |              |          |          |            |       |
| HOCH2CO3        |         |              |         | AIR     |            |              | OFF      | OFF       | OFF     |          |        | OFF    |       |             |             |              |          |          |            |       |
| HOCH2CO3H       |         |              |         | AIR     |            |              | ON       | ON        | ON      | ON       |        | ON     |       |             |             |              |          |          |            |       |
| HYETHO2H        |         |              |         | AIR     |            |              | ON       | ON        | ON      | ON       |        | ON     |       |             |             |              |          |          |            |       |
| PAN             |         |              |         | AIR     |            |              | ON       | ON        | ON      | ON       |        | ON     |       |             |             |              |          |          |            |       |
| PHAN            |         |              |         | AIR     |            |              | ON       | ON        | ON      | ON       |        | ON     |       |             |             |              |          |          |            |       |
| HCOCH2O2        |         |              |         | AIR     |            |              | OFF      | OFF       | OFF     |          |        | OFF    |       |             |             |              |          |          |            |       |
| HOOCH2CO3       |         |              |         | AIR     |            |              | OFF      | OFF       | OFF     |          |        | OFF    |       |             |             |              |          |          |            |       |
| HOCH2CO         |         |              |         | AIR     |            |              | OFF      | OFF       | OFF     |          |        | OFF    |       |             |             |              |          |          |            |       |
| HOCHCHO         |         |              |         | AIR     |            |              | OFF      | OFF       | OFF     |          |        | OFF    |       |             |             |              |          |          |            |       |
| HOOCH2CO2H      |         |              |         | AIR     |            |              | ON       | ON        | ON      | ON       |        | ON     |       |             |             |              |          |          |            |       |
| HOOCH2CO3H      |         |              |         | AIR     |            |              | ON       | ON        | ON      | ON       |        | ON     |       |             |             |              |          |          |            |       |
| HOOCH2CHO       |         |              |         | AIR     |            |              | ON       | ON        | ON      | ON       |        | ON     |       |             |             |              |          |          |            |       |
| CH2CO           |         |              |         | AIR     |            |              | ON       | ON        | ON      | ON       |        | ON     |       |             |             |              |          |          |            |       |
| CH3CHOHO2       |         |              |         | AIR     |            |              | OFF      | OFF       | OFF     |          |        | OFF    |       |             |             |              |          |          |            |       |
| CH3CHOHOOH      |         |              |         | AIR     |            |              | ON       | ON        | ON      | ON       |        | ON     |       |             |             |              |          |          |            |       |
| NO3CH2CHO       |         |              |         | AIR     |            |              | ON       | ON        | ON      | ON       |        | ON     |       |             |             |              |          |          |            |       |
| NO3CH2CO3       |         |              |         | AIR     |            |              | OFF      | OFF       | OFF     |          |        | OFF    |       |             |             |              |          |          |            |       |
| NO3CH2PAN       |         |              |         | AIR     |            |              | ON       | ON        | ON      | ON       |        | ON     |       |             |             |              |          |          |            |       |
| C2H5NO3         |         |              |         | AIR     |            |              | ON       | ON        | ON      | ON       |        | ON     |       |             |             |              |          |          |            |       |
| C2H5O2NO2       |         |              |         | AIR     |            |              | ON       | ON        | ON      | ON       |        | ON     |       |             |             |              |          |          |            |       |
| CH3CO           |         |              |         | AIR     |            |              | OFF      | OFF       | OFF     |          |        | OFF    |       |             |             |              |          |          |            |       |
| NCCH2O2         |         |              |         | AIR     |            |              | OFF      | OFF       | OFF     |          |        | OFF    |       |             |             |              |          |          |            |       |
| CH3CN           |         |              |         | AIR     |            |              | ON       | ON        | ON      | ON       |        | ON     |       |             |             |              |          |          |            |       |
| CH2CHOH         |         |              |         | AIR     |            |              | ON       | ON        | ON      | ON       |        | ON     |       |             |             |              |          |          |            |       |
|-----------------+---------+--------------+---------+---------+------------+--------------+----------+-----------+---------+----------+--------+--------+-------+-------------+-------------+--------------+----------+----------+------------+-------|
| ACETOL          |         |              |         | AIR     |            |              | ON       | ON        | ON      | ON       |        | ON     |       |             |             |              |          |          |            |       |
| C3H6            |         |              |         | AIR     |            |              | ON       | ON        | ON      |          |        | OFF    |       |             |             |              |          |          |            |       |
| C3H8            |         |              |         | AIR     |            |              | ON       | ON        | ON      |          |        | OFF    |       |             |             |              |          |          |            |       |
| CH3COCH2O2      |         |              |         | AIR     |            |              | OFF      | OFF       | OFF     |          |        | OFF    |       |             |             |              |          |          |            |       |
| CH3COCH3        |         |              |         | AIR     |            |              | ON       | ON        | ON      | ON       |        | ON     |       |             |             |              |          |          |            |       |
| HOCH2COCHO      |         |              |         | AIR     |            |              | ON       | ON        | ON      | ON       |        | ON     |       |             |             |              |          |          |            |       |
| HYPERACET       |         |              |         | AIR     |            |              | ON       | ON        | ON      | ON       |        | ON     |       |             |             |              |          |          |            |       |
| HYPROPO2        |         |              |         | AIR     |            |              | OFF      | OFF       | OFF     |          |        | OFF    |       |             |             |              |          |          |            |       |
| HYPROPO2H       |         |              |         | AIR     |            |              | ON       | ON        | ON      | ON       |        | ON     |       |             |             |              |          |          |            |       |
| IC3H7NO3        |         |              |         | AIR     |            |              | ON       | ON        | ON      | ON       |        | OFF    |       |             |             |              |          |          |            |       |
| IC3H7O2         |         |              |         | AIR     |            |              | OFF      | OFF       | OFF     |          |        | OFF    |       |             |             |              |          |          |            |       |
| IC3H7OOH        |         |              |         | AIR     |            |              | ON       | ON        | ON      | ON       |        | ON     |       |             |             |              |          |          |            |       |
| IPROPOL         |         |              |         | AIR     |            |              | ON       | ON        | ON      | ON       |        | ON     |       |             |             |              |          |          |            |       |
| NPROPOL         |         |              |         | AIR     |            |              | ON       | ON        | ON      | ON       |        | ON     |       |             |             |              |          |          |            |       |
| MGLYOX          |         |              |         | AIR     |            |              | ON       | ON        | ON      | ON       |        | ON     |       |             |             |              |          |          |            |       |
| NOA             |         |              |         | AIR     |            |              | ON       | ON        | ON      | ON       |        | ON     |       |             |             |              |          |          |            |       |
| PR2O2HNO3       |         |              |         | AIR     |            |              | ON       | ON        | ON      | ON       |        | ON     |       |             |             |              |          |          |            |       |
| PRONO3BO2       |         |              |         | AIR     |            |              | OFF      | OFF       | OFF     |          |        | OFF    |       |             |             |              |          |          |            |       |
| CHOCOCH2O2      |         |              |         | AIR     |            |              | OFF      | OFF       | OFF     |          |        | OFF    |       |             |             |              |          |          |            |       |
| HCOCH2CO3       |         |              |         | AIR     |            |              | OFF      | OFF       | OFF     |          |        | OFF    |       |             |             |              |          |          |            |       |
| ALCOCH2OOH      |         |              |         | AIR     |            |              | ON       | ON        | ON      | ON       |        | ON     |       |             |             |              |          |          |            |       |
| HCOCH2CHO       |         |              |         | AIR     |            |              | ON       | ON        | ON      | ON       |        | ON     |       |             |             |              |          |          |            |       |
| HCOCH2CO2H      |         |              |         | AIR     |            |              | ON       | ON        | ON      | ON       |        | ON     |       |             |             |              |          |          |            |       |
| HCOCH2CO3H      |         |              |         | AIR     |            |              | ON       | ON        | ON      | ON       |        | ON     |       |             |             |              |          |          |            |       |
| HOC2H4CO3       |         |              |         | AIR     |            |              | OFF      | OFF       | OFF     |          |        | OFF    |       |             |             |              |          |          |            |       |
| HOC2H4CO2H      |         |              |         | AIR     |            |              | ON       | ON        | ON      | ON       |        | ON     |       |             |             |              |          |          |            |       |
| HOC2H4CO3H      |         |              |         | AIR     |            |              | ON       | ON        | ON      | ON       |        | ON     |       |             |             |              |          |          |            |       |
| HOCH2COCH2O2    |         |              |         | AIR     |            |              | OFF      | OFF       | OFF     |          |        | OFF    |       |             |             |              |          |          |            |       |
| HOCH2COCH2OOH   |         |              |         | AIR     |            |              | ON       | ON        | ON      | ON       |        | ON     |       |             |             |              |          |          |            |       |
| CH3CHCO         |         |              |         | AIR     |            |              | ON       | ON        | ON      | ON       |        | ON     |       |             |             |              |          |          |            |       |
| CH3COCO2H       |         |              |         | AIR     |            |              | ON       | ON        | ON      | ON       |        | ON     |       |             |             |              |          |          |            |       |
| CH3COCO3H       |         |              |         | AIR     |            |              | ON       | ON        | ON      | ON       |        | ON     |       |             |             |              |          |          |            |       |
| CH3COCO3        |         |              |         | AIR     |            |              | OFF      | OFF       | OFF     |          |        | OFF    |       |             |             |              |          |          |            |       |
| HCOCOCH2OOH     |         |              |         | AIR     |            |              | ON       | ON        | ON      | ON       |        | ON     |       |             |             |              |          |          |            |       |
| C3PAN2          |         |              |         | AIR     |            |              | ON       | ON        | ON      | ON       |        | ON     |       |             |             |              |          |          |            |       |
| C3PAN1          |         |              |         | AIR     |            |              | ON       | ON        | ON      | ON       |        | ON     |       |             |             |              |          |          |            |       |
| CH3COCH2O2NO2   |         |              |         | AIR     |            |              | ON       | ON        | ON      | ON       |        | ON     |       |             |             |              |          |          |            |       |
| PROPOLNO3       |         |              |         | AIR     |            |              | ON       | ON        | ON      | ON       |        | OFF    |       |             |             |              |          |          |            |       |
| C2H5CHO         |         |              |         | AIR     |            |              | ON       | ON        | ON      | ON       |        | ON     |       |             |             |              |          |          |            |       |
| PROPENOL        |         |              |         | AIR     |            |              | ON       | ON        | ON      | ON       |        | ON     |       |             |             |              |          |          |            |       |
| C2H5CO3         |         |              |         | AIR     |            |              | OFF      | OFF       | OFF     |          |        | OFF    |       |             |             |              |          |          |            |       |
| PROPACID        |         |              |         | AIR     |            |              | ON       | ON        | ON      | ON       |        | ON     |       |             |             |              |          |          |            |       |
| PERPROACID      |         |              |         | AIR     |            |              | ON       | ON        | ON      | ON       |        | ON     |       |             |             |              |          |          |            |       |
| NC3H7NO3        |         |              |         | AIR     |            |              | ON       | ON        | ON      | ON       |        | OFF    |       |             |             |              |          |          |            |       |
| NC3H7OOH        |         |              |         | AIR     |            |              | ON       | ON        | ON      | ON       |        | ON     |       |             |             |              |          |          |            |       |
| NC3H7O2         |         |              |         | AIR     |            |              | OFF      | OFF       | OFF     |          |        | OFF    |       |             |             |              |          |          |            |       |
| PPN             |         |              |         | AIR     |            |              | ON       | ON        | ON      | ON       |        | ON     |       |             |             |              |          |          |            |       |
| C5DICARBO2      |         |              |         | AIR     |            |              | OFF      | OFF       | OFF     | OFF      |        | OFF    |       |             |             |              |          |          |            |       |
| MCOCOMOOOH      |         |              |         | AIR     |            |              | ON       | ON        | ON      | ON       |        | ON     |       |             |             |              |          |          |            |       |
| C33CO           |         |              |         | AIR     |            |              | ON       | ON        | ON      | ON       |        | ON     |       |             |             |              |          |          |            |       |
| C3DIALOOH       |         |              |         | AIR     |            |              | ON       | ON        | ON      | ON       |        | ON     |       |             |             |              |          |          |            |       |
| C3DIALO2        |         |              |         | AIR     |            |              | OFF      | OFF       | OFF     | OFF      |        | OFF    |       |             |             |              |          |          |            |       |
| HCOCOHCO3       |         |              |         | AIR     |            |              | OFF      | OFF       | OFF     | OFF      |        | OFF    |       |             |             |              |          |          |            |       |
| METACETHO       |         |              |         | AIR     |            |              | ON       | ON        | ON      | ON       |        | ON     |       |             |             |              |          |          |            |       |
| C5DIALCO        |         |              |         | AIR     |            |              | ON       | ON        | ON      | ON       |        | ON     |       |             |             |              |          |          |            |       |
| HCOCOHPAN       |         |              |         | AIR     |            |              | ON       | ON        | ON      | ON       |        | ON     |       |             |             |              |          |          |            |       |
| C32OH13CO       |         |              |         | AIR     |            |              | ON       | ON        | ON      | ON       |        | ON     |       |             |             |              |          |          |            |       |
| HCOCOHCO3H      |         |              |         | AIR     |            |              | ON       | ON        | ON      | ON       |        | ON     |       |             |             |              |          |          |            |       |
|-----------------+---------+--------------+---------+---------+------------+--------------+----------+-----------+---------+----------+--------+--------+-------+-------------+-------------+--------------+----------+----------+------------+-------|
| BIACET          |         |              |         | AIR     |            |              | ON       | ON        | ON      | ON       |        | ON     |       |             |             |              |          |          |            |       |
| BIACETOH        |         |              |         | AIR     |            |              | ON       | ON        | ON      | ON       |        | ON     |       |             |             |              |          |          |            |       |
| CO2H3CHO        |         |              |         | AIR     |            |              | ON       | ON        | ON      | ON       |        | ON     |       |             |             |              |          |          |            |       |
| CO2H3CO3        |         |              |         | AIR     |            |              | OFF      | OFF       | OFF     |          |        | OFF    |       |             |             |              |          |          |            |       |
| CO2H3CO3H       |         |              |         | AIR     |            |              | ON       | ON        | ON      |          |        | ON     |       |             |             |              |          |          |            |       |
| HO12CO3C4       |         |              |         | AIR     |            |              | ON       | ON        | ON      | ON       |        | ON     |       |             |             |              |          |          |            |       |
| LC4H9NO3        |         |              |         | AIR     |            |              | ON       | ON        | ON      | ON       |        | OFF    |       |             |             |              |          |          |            |       |
| LC4H9O2         |         |              |         | AIR     |            |              | OFF      | OFF       | OFF     |          |        | OFF    |       |             |             |              |          |          |            |       |
| LC4H9OOH        |         |              |         | AIR     |            |              | ON       | ON        | ON      | ON       |        | ON     |       |             |             |              |          |          |            |       |
| IC4H9NO3        |         |              |         | AIR     |            |              | ON       | ON        | ON      | ON       |        | OFF    |       |             |             |              |          |          |            |       |
| IC4H9O2         |         |              |         | AIR     |            |              | OFF      | OFF       | OFF     |          |        | OFF    |       |             |             |              |          |          |            |       |
| IC4H9OOH        |         |              |         | AIR     |            |              | ON       | ON        | ON      | ON       |        | ON     |       |             |             |              |          |          |            |       |
| TC4H9NO3        |         |              |         | AIR     |            |              | ON       | ON        | ON      | ON       |        | OFF    |       |             |             |              |          |          |            |       |
| TC4H9O2         |         |              |         | AIR     |            |              | OFF      | OFF       | OFF     |          |        | OFF    |       |             |             |              |          |          |            |       |
| TC4H9OOH        |         |              |         | AIR     |            |              | ON       | ON        | ON      | ON       |        | ON     |       |             |             |              |          |          |            |       |
| LHMVKABO2       |         |              |         | AIR     |            |              | OFF      | OFF       | OFF     |          |        |        |       |             |             |              |          |          |            |       |
| LHMVKABOOH      |         |              |         | AIR     |            |              | ON       | ON        | ON      | ON       |        | ON     |       |             |             |              |          |          |            |       |
| LMEKO2          |         |              |         | AIR     |            |              | OFF      | OFF       | OFF     |          |        | OFF    |       |             |             |              |          |          |            |       |
| LMEKOOH         |         |              |         | AIR     |            |              | ON       | ON        | ON      | ON       |        | ON     |       |             |             |              |          |          |            |       |
| LMVKOHABO2      |         |              |         | AIR     |            |              | OFF      | OFF       | OFF     |          |        |        |       |             |             |              |          |          |            |       |
| LMVKOHABOOH     |         |              |         | AIR     |            |              | ON       | ON        | ON      | ON       |        | ON     |       |             |             |              |          |          |            |       |
| MACO2H          |         |              |         | AIR     |            |              | ON       | ON        | ON      | ON       |        | ON     |       |             |             |              |          |          |            |       |
| MACO3           |         |              |         | AIR     |            |              | OFF      | OFF       | OFF     |          |        | OFF    |       |             |             |              |          |          |            |       |
| MACO3H          |         |              |         | AIR     |            |              | ON       | ON        | ON      | ON       |        | ON     |       |             |             |              |          |          |            |       |
| MACR            |         |              |         | AIR     |            |              | ON       | ON        | ON      | ON       |        | ON     |       |             |             |              |          |          |            |       |
| MACRO2          |         |              |         | AIR     |            |              | OFF      | OFF       | OFF     |          |        | OFF    |       |             |             |              |          |          |            |       |
| MACROH          |         |              |         | AIR     |            |              | ON       | ON        | ON      | ON       |        | ON     |       |             |             |              |          |          |            |       |
| MACROOH         |         |              |         | AIR     |            |              | ON       | ON        | ON      | ON       |        | ON     |       |             |             |              |          |          |            |       |
| MEK             |         |              |         | AIR     |            |              | ON       | ON        | ON      | ON       |        | ON     |       |             |             |              |          |          |            |       |
| MPAN            |         |              |         | AIR     |            |              | ON       | ON        | ON      | ON       |        | OFF    |       |             |             |              |          |          |            |       |
| MVK             |         |              |         | AIR     |            |              | ON       | ON        | ON      | ON       |        | ON     |       |             |             |              |          |          |            |       |
| MVKOH           |         |              |         | AIR     |            |              | ON       | ON        | ON      | ON       |        | ON     |       |             |             |              |          |          |            |       |
| NC4H10          |         |              |         | AIR     |            |              | ON       | ON        | ON      | OFF      |        | OFF    |       |             |             |              |          |          |            |       |
| IC4H10          |         |              |         | AIR     |            |              | ON       | ON        | ON      | OFF      |        | OFF    |       |             |             |              |          |          |            |       |
| C312COCO3       |         |              |         | AIR     |            |              | OFF      | OFF       | OFF     |          |        | OFF    |       |             |             |              |          |          |            |       |
| C44O2           |         |              |         | AIR     |            |              | OFF      | OFF       | OFF     |          |        | OFF    |       |             |             |              |          |          |            |       |
| MACO2           |         |              |         | AIR     |            |              | OFF      | OFF       | OFF     |          |        | OFF    |       |             |             |              |          |          |            |       |
| MACRO           |         |              |         | AIR     |            |              | OFF      | OFF       | OFF     |          |        | OFF    |       |             |             |              |          |          |            |       |
| EZCH3CO2CHCHO   |         |              |         | AIR     |            |              | OFF      | OFF       | OFF     |          |        | OFF    |       |             |             |              |          |          |            |       |
| EZCHOCCH3CHO2   |         |              |         | AIR     |            |              | OFF      | OFF       | OFF     |          |        | OFF    |       |             |             |              |          |          |            |       |
| CH3COCHO2CHO    |         |              |         | AIR     |            |              | OFF      | OFF       | OFF     |          |        | OFF    |       |             |             |              |          |          |            |       |
| HCOCO2CH3CHO    |         |              |         | AIR     |            |              | OFF      | OFF       | OFF     |          |        | OFF    |       |             |             |              |          |          |            |       |
| IPRHOCO3        |         |              |         | AIR     |            |              | OFF      | OFF       | OFF     |          |        | OFF    |       |             |             |              |          |          |            |       |
| MBOOO           |         |              |         | AIR     |            |              | OFF      | OFF       | OFF     |          |        | OFF    |       |             |             |              |          |          |            |       |
| C4CODIAL        |         |              |         | AIR     |            |              | ON       | ON        | ON      | ON       |        | ON     |       |             |             |              |          |          |            |       |
| C312COCO3H      |         |              |         | AIR     |            |              | ON       | ON        | ON      | ON       |        | ON     |       |             |             |              |          |          |            |       |
| BIACETO2        |         |              |         | AIR     |            |              | ON       | ON        | ON      | ON       |        | ON     |       |             |             |              |          |          |            |       |
| CHOC3COO2       |         |              |         | AIR     |            |              | ON       | ON        | ON      | ON       |        | ON     |       |             |             |              |          |          |            |       |
| C413COOOH       |         |              |         | AIR     |            |              | ON       | ON        | ON      | ON       |        | ON     |       |             |             |              |          |          |            |       |
| BIACETOOH       |         |              |         | AIR     |            |              | ON       | ON        | ON      | ON       |        | ON     |       |             |             |              |          |          |            |       |
| C44OOH          |         |              |         | AIR     |            |              | ON       | ON        | ON      | ON       |        | ON     |       |             |             |              |          |          |            |       |
| HCOCCH3CO       |         |              |         | AIR     |            |              | ON       | ON        | ON      | ON       |        | ON     |       |             |             |              |          |          |            |       |
| CO2H3CO2H       |         |              |         | AIR     |            |              | ON       | ON        | ON      | ON       |        | ON     |       |             |             |              |          |          |            |       |
| CH3COCOCO2H     |         |              |         | AIR     |            |              | ON       | ON        | ON      | ON       |        | ON     |       |             |             |              |          |          |            |       |
| CH3COOHCHCHO    |         |              |         | AIR     |            |              | ON       | ON        | ON      | ON       |        | ON     |       |             |             |              |          |          |            |       |
| HCOCCH3CHOOH    |         |              |         | AIR     |            |              | ON       | ON        | ON      | ON       |        | ON     |       |             |             |              |          |          |            |       |
| IPRHOCO2H       |         |              |         | AIR     |            |              | ON       | ON        | ON      | ON       |        | ON     |       |             |             |              |          |          |            |       |
| IPRHOCO3H       |         |              |         | AIR     |            |              | ON       | ON        | ON      | ON       |        | ON     |       |             |             |              |          |          |            |       |
| IBUTALOH        |         |              |         | AIR     |            |              | ON       | ON        | ON      | ON       |        | ON     |       |             |             |              |          |          |            |       |
| C312COPAN       |         |              |         | AIR     |            |              | ON       | ON        | ON      | ON       |        | ON     |       |             |             |              |          |          |            |       |
| MVKNO3          |         |              |         | AIR     |            |              | ON       | ON        | ON      | ON       |        | ON     |       |             |             |              |          |          |            |       |
| MACRNO3         |         |              |         | AIR     |            |              | ON       | ON        | ON      | ON       |        | ON     |       |             |             |              |          |          |            |       |
| CH3COCHCO       |         |              |         | AIR     |            |              | ON       | ON        | ON      | ON       |        | ON     |       |             |             |              |          |          |            |       |
| LMEKNO3         |         |              |         | AIR     |            |              | ON       | ON        | ON      | ON       |        | ON     |       |             |             |              |          |          |            |       |
| MEPROPENE       |         |              |         | AIR     |            |              | ON       | ON        | ON      | OFF      |        | OFF    |       |             |             |              |          |          |            |       |
| IBUTOLBNO3      |         |              |         | AIR     |            |              | ON       | ON        | ON      | ON       |        | OFF    |       |             |             |              |          |          |            |       |
| IBUTOLBO2       |         |              |         | AIR     |            |              | OFF      | OFF       | OFF     |          |        | OFF    |       |             |             |              |          |          |            |       |
| IBUTOLBOOH      |         |              |         | AIR     |            |              | ON       | ON        | ON      | ON       |        | ON     |       |             |             |              |          |          |            |       |
| BUT1ENE         |         |              |         | AIR     |            |              | ON       | ON        | ON      | OFF      |        | OFF    |       |             |             |              |          |          |            |       |
| LBUT1ENNO3      |         |              |         | AIR     |            |              | ON       | ON        | ON      | ON       |        | OFF    |       |             |             |              |          |          |            |       |
| LBUT1ENO2       |         |              |         | AIR     |            |              | OFF      | OFF       | OFF     |          |        | OFF    |       |             |             |              |          |          |            |       |
| LBUT1ENOOH      |         |              |         | AIR     |            |              | ON       | ON        | ON      | ON       |        | ON     |       |             |             |              |          |          |            |       |
| CBUT2ENE        |         |              |         | AIR     |            |              | ON       | ON        | ON      | OFF      |        | OFF    |       |             |             |              |          |          |            |       |
| TBUT2ENE        |         |              |         | AIR     |            |              | ON       | ON        | ON      | OFF      |        | OFF    |       |             |             |              |          |          |            |       |
| BUT2OLNO3       |         |              |         | AIR     |            |              | ON       | ON        | ON      | ON       |        | OFF    |       |             |             |              |          |          |            |       |
| BUT2OLO2        |         |              |         | AIR     |            |              | OFF      | OFF       | OFF     |          |        | OFF    |       |             |             |              |          |          |            |       |
| BUT2OLOOH       |         |              |         | AIR     |            |              | ON       | ON        | ON      | ON       |        | ON     |       |             |             |              |          |          |            |       |
| BUT2OLO         |         |              |         | AIR     |            |              | ON       | ON        | ON      | ON       |        | ON     |       |             |             |              |          |          |            |       |
| C3H7CHO         |         |              |         | AIR     |            |              | ON       | ON        | ON      | ON       |        | ON     |       |             |             |              |          |          |            |       |
| BUTENOL         |         |              |         | AIR     |            |              | ON       | ON        | ON      | ON       |        | ON     |       |             |             |              |          |          |            |       |
| IPRCHO          |         |              |         | AIR     |            |              | ON       | ON        | ON      | ON       |        | ON     |       |             |             |              |          |          |            |       |
| MPROPENOL       |         |              |         | AIR     |            |              | ON       | ON        | ON      | ON       |        | ON     |       |             |             |              |          |          |            |       |
| IPRCO3          |         |              |         | AIR     |            |              | OFF      | OFF       | OFF     |          |        | OFF    |       |             |             |              |          |          |            |       |
| PERIBUACID      |         |              |         | AIR     |            |              | ON       | ON        | ON      | ON       |        | ON     |       |             |             |              |          |          |            |       |
| PIPN            |         |              |         | AIR     |            |              | ON       | ON        | ON      | ON       |        | ON     |       |             |             |              |          |          |            |       |
|-----------------+---------+--------------+---------+---------+------------+--------------+----------+-----------+---------+----------+--------+--------+-------+-------------+-------------+--------------+----------+----------+------------+-------|
| CO2C3CHO        |         |              |         | AIR     |            |              | ON       | ON        | ON      | ON       |        | ON     |       |             |             |              |          |          |            |       |
| IBUTDIAL        |         |              |         | AIR     |            |              | ON       | ON        | ON      | ON       |        | ON     |       |             |             |              |          |          |            |       |
| HVMK            |         |              |         | AIR     |            |              | ON       | ON        | ON      | ON       |        | ON     |       |             |             |              |          |          |            |       |
| HMAC            |         |              |         | AIR     |            |              | ON       | ON        | ON      | ON       |        | ON     |       |             |             |              |          |          |            |       |
| MALANHY         |         |              |         | AIR     |            |              | ON       | ON        | ON      | ON       |        | ON     |       |             |             |              |          |          |            |       |
| MALDIALOOH      |         |              |         | AIR     |            |              | ON       | ON        | ON      | ON       |        | ON     |       |             |             |              |          |          |            |       |
| NC4DCO2H        |         |              |         | AIR     |            |              | ON       | ON        | ON      | ON       |        | ON     |       |             |             |              |          |          |            |       |
| CO14O3CO2H      |         |              |         | AIR     |            |              | ON       | ON        | ON      | ON       |        | ON     |       |             |             |              |          |          |            |       |
| BZFUOOH         |         |              |         | AIR     |            |              | ON       | ON        | ON      | ON       |        | ON     |       |             |             |              |          |          |            |       |
| HOCOC4DIAL      |         |              |         | AIR     |            |              | ON       | ON        | ON      | ON       |        | ON     |       |             |             |              |          |          |            |       |
| MALDIALCO3      |         |              |         | AIR     |            |              | OFF      | OFF       | OFF     | OFF      |        | OFF    |       |             |             |              |          |          |            |       |
| BZFUONE         |         |              |         | AIR     |            |              | ON       | ON        | ON      | ON       |        | ON     |       |             |             |              |          |          |            |       |
| NBZFUOOH        |         |              |         | AIR     |            |              | ON       | ON        | ON      | ON       |        | ON     |       |             |             |              |          |          |            |       |
| MALDALCO3H      |         |              |         | AIR     |            |              | ON       | ON        | ON      | ON       |        | ON     |       |             |             |              |          |          |            |       |
| EPXDLCO2H       |         |              |         | AIR     |            |              | ON       | ON        | ON      | ON       |        | ON     |       |             |             |              |          |          |            |       |
| EPXDLCO3        |         |              |         | AIR     |            |              | OFF      | OFF       | OFF     | OFF      |        | OFF    |       |             |             |              |          |          |            |       |
| MALNHYOHCO      |         |              |         | AIR     |            |              | ON       | ON        | ON      | ON       |        | ON     |       |             |             |              |          |          |            |       |
| MALDIAL         |         |              |         | AIR     |            |              | ON       | ON        | ON      | ON       |        | ON     |       |             |             |              |          |          |            |       |
| MALANHYOOH      |         |              |         | AIR     |            |              | ON       | ON        | ON      | ON       |        | ON     |       |             |             |              |          |          |            |       |
| MALDIALPAN      |         |              |         | AIR     |            |              | ON       | ON        | ON      | ON       |        | ON     |       |             |             |              |          |          |            |       |
| MALANHYO2       |         |              |         | AIR     |            |              | OFF      | OFF       | OFF     | OFF      |        | OFF    |       |             |             |              |          |          |            |       |
| EPXDLCO3H       |         |              |         | AIR     |            |              | ON       | ON        | ON      | ON       |        | ON     |       |             |             |              |          |          |            |       |
| CO2C4DIAL       |         |              |         | AIR     |            |              | ON       | ON        | ON      | ON       |        | ON     |       |             |             |              |          |          |            |       |
| NBZFUO2         |         |              |         | AIR     |            |              | OFF      | OFF       | OFF     | OFF      |        | OFF    |       |             |             |              |          |          |            |       |
| CO23C3CHO       |         |              |         | AIR     |            |              | ON       | ON        | ON      | ON       |        | ON     |       |             |             |              |          |          |            |       |
| MALDALCO2H      |         |              |         | AIR     |            |              | ON       | ON        | ON      | ON       |        | ON     |       |             |             |              |          |          |            |       |
| EPXC4DIAL       |         |              |         | AIR     |            |              | ON       | ON        | ON      | ON       |        | ON     |       |             |             |              |          |          |            |       |
| MECOACETO2      |         |              |         | AIR     |            |              | OFF      | OFF       | OFF     | OFF      |        | OFF    |       |             |             |              |          |          |            |       |
| CO14O3CHO       |         |              |         | AIR     |            |              | ON       | ON        | ON      | ON       |        | ON     |       |             |             |              |          |          |            |       |
| NBZFUONE        |         |              |         | AIR     |            |              | ON       | ON        | ON      | ON       |        | ON     |       |             |             |              |          |          |            |       |
| BZFUO2          |         |              |         | AIR     |            |              | OFF      | OFF       | OFF     | OFF      |        | OFF    |       |             |             |              |          |          |            |       |
| BZFUCO          |         |              |         | AIR     |            |              | ON       | ON        | ON      | ON       |        | ON     |       |             |             |              |          |          |            |       |
| MALDIALO2       |         |              |         | AIR     |            |              | OFF      | OFF       | OFF     | OFF      |        | OFF    |       |             |             |              |          |          |            |       |
| MCOCOMOXO2      |         |              |         | AIR     |            |              | OFF      | OFF       | OFF     | OFF      |        | OFF    |       |             |             |              |          |          |            |       |
|-----------------+---------+--------------+---------+---------+------------+--------------+----------+-----------+---------+----------+--------+--------+-------+-------------+-------------+--------------+----------+----------+------------+-------|
| C59O2           |         |              |         | AIR     |            |              | OFF      | OFF       | OFF     |          |        | OFF    |       |             |             |              |          |          |            |       |
| C59OOH          |         |              |         | AIR     |            |              | ON       | ON        | ON      | ON       |        | ON     |       |             |             |              |          |          |            |       |
| C5H8            |         |              |         | AIR     |            |              | ON       | ON        | ON      | ON       |        | OFF    |       |             |             |              |          |          |            |       |
| HCOC5           |         |              |         | AIR     |            |              | ON       | ON        | ON      | ON       |        | ON     |       |             |             |              |          |          |            |       |
| ISOPAOH         |         |              |         | AIR     |            |              | ON       | ON        | ON      | ON       |        | ON     |       |             |             |              |          |          |            |       |
| ISOPBNO3        |         |              |         | AIR     |            |              | ON       | ON        | ON      | ON       |        | ON     |       |             |             |              |          |          |            |       |
| ISOPBO2         |         |              |         | AIR     |            |              | OFF      | OFF       | OFF     |          |        | OFF    |       |             |             |              |          |          |            |       |
| ISOPBOH         |         |              |         | AIR     |            |              | ON       | ON        | ON      | ON       |        | ON     |       |             |             |              |          |          |            |       |
| ISOPBOOH        |         |              |         | AIR     |            |              | ON       | ON        | ON      | ON       |        | ON     |       |             |             |              |          |          |            |       |
| ISOPDNO3        |         |              |         | AIR     |            |              | ON       | ON        | ON      | ON       |        | ON     |       |             |             |              |          |          |            |       |
| ISOPDO2         |         |              |         | AIR     |            |              | OFF      | OFF       | OFF     |          |        |        |       |             |             |              |          |          |            |       |
| ISOPDOH         |         |              |         | AIR     |            |              | ON       | ON        | ON      | ON       |        | ON     |       |             |             |              |          |          |            |       |
| ISOPDOOH        |         |              |         | AIR     |            |              | ON       | ON        | ON      | ON       |        | ON     |       |             |             |              |          |          |            |       |
| LC578O2         |         |              |         | AIR     |            |              | OFF      | OFF       | OFF     |          |        |        |       |             |             |              |          |          |            |       |
| LC578OOH        |         |              |         | AIR     |            |              | ON       | ON        | ON      | ON       |        | ON     |       |             |             |              |          |          |            |       |
| LC5PAN1719      |         |              |         | AIR     |            |              | ON       | ON        | ON      | ON       |        | ON     |       |             |             |              |          |          |            |       |
| LHC4ACCHO       |         |              |         | AIR     |            |              | ON       | ON        | ON      | ON       |        | ON     |       |             |             |              |          |          |            |       |
| LHC4ACCO2H      |         |              |         | AIR     |            |              | ON       | ON        | ON      | ON       |        | ON     |       |             |             |              |          |          |            |       |
| LHC4ACCO3       |         |              |         | AIR     |            |              | OFF      | OFF       | OFF     |          |        |        |       |             |             |              |          |          |            |       |
| LHC4ACCO3H      |         |              |         | AIR     |            |              | ON       | ON        | ON      | ON       |        | ON     |       |             |             |              |          |          |            |       |
| LISOPACNO3      |         |              |         | AIR     |            |              | ON       | ON        | ON      | ON       |        | ON     |       |             |             |              |          |          |            |       |
| LISOPACO        |         |              |         | AIR     |            |              | OFF      | OFF       | OFF     |          |        |        |       |             |             |              |          |          |            |       |
| LISOPACO2       |         |              |         | AIR     |            |              | OFF      | OFF       | OFF     |          |        |        |       |             |             |              |          |          |            |       |
| LISOPACOOH      |         |              |         | AIR     |            |              | ON       | ON        | ON      | ON       |        | ON     |       |             |             |              |          |          |            |       |
| LNISO3          |         |              |         | AIR     |            |              | OFF      | OFF       | OFF     |          |        |        |       |             |             |              |          |          |            |       |
| LNISOOH         |         |              |         | AIR     |            |              | ON       | ON        | ON      | ON       |        | ON     |       |             |             |              |          |          |            |       |
| NC4CHO          |         |              |         | AIR     |            |              | ON       | ON        | ON      | ON       |        | ON     |       |             |             |              |          |          |            |       |
| NISOPO2         |         |              |         | AIR     |            |              | OFF      | OFF       | OFF     |          |        | OFF    |       |             |             |              |          |          |            |       |
| NISOPOOH        |         |              |         | AIR     |            |              | ON       | ON        | ON      | ON       |        | ON     |       |             |             |              |          |          |            |       |
| CHOC3COCO3      |         |              |         | AIR     |            |              | OFF      | OFF       | OFF     |          |        | OFF    |       |             |             |              |          |          |            |       |
| CO23C4CO3       |         |              |         | AIR     |            |              | OFF      | OFF       | OFF     |          |        | OFF    |       |             |             |              |          |          |            |       |
| C511O2          |         |              |         | AIR     |            |              | OFF      | OFF       | OFF     |          |        | OFF    |       |             |             |              |          |          |            |       |
| C512O2          |         |              |         | AIR     |            |              | OFF      | OFF       | OFF     |          |        | OFF    |       |             |             |              |          |          |            |       |
| C513O2          |         |              |         | AIR     |            |              | OFF      | OFF       | OFF     |          |        | OFF    |       |             |             |              |          |          |            |       |
| C514O2          |         |              |         | AIR     |            |              | OFF      | OFF       | OFF     |          |        | OFF    |       |             |             |              |          |          |            |       |
| LISOPAB         |         |              |         | AIR     |            |              | OFF      | OFF       | OFF     |          |        | OFF    |       |             |             |              |          |          |            |       |
| LISOPCD         |         |              |         | AIR     |            |              | OFF      | OFF       | OFF     |          |        | OFF    |       |             |             |              |          |          |            |       |
| LISOPEFO2       |         |              |         | AIR     |            |              | OFF      | OFF       | OFF     |          |        |        |       |             |             |              |          |          |            |       |
| LISOPEFO        |         |              |         | AIR     |            |              | OFF      | OFF       | OFF     |          |        |        |       |             |             |              |          |          |            |       |
| LDISOPACO       |         |              |         | AIR     |            |              | OFF      | OFF       | OFF     |          |        |        |       |             |             |              |          |          |            |       |
| LDISOPACO2      |         |              |         | AIR     |            |              | OFF      | OFF       | OFF     |          |        |        |       |             |             |              |          |          |            |       |
| ISOPBDNO3O2     |         |              |         | AIR     |            |              | OFF      | OFF       | OFF     |          |        | OFF    |       |             |             |              |          |          |            |       |
| LISOPACNO3O2    |         |              |         | AIR     |            |              | OFF      | OFF       | OFF     |          |        | OFF    |       |             |             |              |          |          |            |       |
| DB1O            |         |              |         | AIR     |            |              | OFF      | OFF       | OFF     |          |        | OFF    |       |             |             |              |          |          |            |       |
| DB1O2           |         |              |         | AIR     |            |              | OFF      | OFF       | OFF     |          |        | OFF    |       |             |             |              |          |          |            |       |
| DB2O2           |         |              |         | AIR     |            |              | OFF      | OFF       | OFF     |          |        | OFF    |       |             |             |              |          |          |            |       |
| C1ODC2O2C4OD    |         |              |         | AIR     |            |              | OFF      | OFF       | OFF     |          |        | OFF    |       |             |             |              |          |          |            |       |
| NC4OHCO3        |         |              |         | AIR     |            |              | OFF      | OFF       | OFF     |          |        | OFF    |       |             |             |              |          |          |            |       |
| LNMBOABO2       |         |              |         | AIR     |            |              | OFF      | OFF       | OFF     |          |        | OFF    |       |             |             |              |          |          |            |       |
| LME3FURANO2     |         |              |         | AIR     |            |              | OFF      | OFF       | OFF     |          |        | OFF    |       |             |             |              |          |          |            |       |
| LMBOABO2        |         |              |         | AIR     |            |              | OFF      | OFF       | OFF     |          |        | OFF    |       |             |             |              |          |          |            |       |
| CO13C4CHO       |         |              |         | AIR     |            |              | ON       | ON        | ON      | ON       |        | ON     |       |             |             |              |          |          |            |       |
| CO23C4CHO       |         |              |         | AIR     |            |              | ON       | ON        | ON      | ON       |        | ON     |       |             |             |              |          |          |            |       |
| C513CO          |         |              |         | AIR     |            |              | ON       | ON        | ON      | ON       |        | ON     |       |             |             |              |          |          |            |       |
| CHOC3COOOH      |         |              |         | AIR     |            |              | ON       | ON        | ON      | ON       |        | ON     |       |             |             |              |          |          |            |       |
| CO23C4CO3H      |         |              |         | AIR     |            |              | ON       | ON        | ON      | ON       |        | ON     |       |             |             |              |          |          |            |       |
| C511OOH         |         |              |         | AIR     |            |              | ON       | ON        | ON      | ON       |        | ON     |       |             |             |              |          |          |            |       |
| C512OOH         |         |              |         | AIR     |            |              | ON       | ON        | ON      | ON       |        | ON     |       |             |             |              |          |          |            |       |
| C513OOH         |         |              |         | AIR     |            |              | ON       | ON        | ON      | ON       |        | ON     |       |             |             |              |          |          |            |       |
| C514OOH         |         |              |         | AIR     |            |              | ON       | ON        | ON      | ON       |        | ON     |       |             |             |              |          |          |            |       |
| C1ODC2O2C4OOH   |         |              |         | AIR     |            |              | ON       | ON        | ON      | ON       |        | ON     |       |             |             |              |          |          |            |       |
| C1ODC3O2C4OOH   |         |              |         | AIR     |            |              | ON       | ON        | ON      | ON       |        | ON     |       |             |             |              |          |          |            |       |
| LZCODC23DBCOOH  |         |              |         | AIR     |            |              | ON       | ON        | ON      | ON       |        | ON     |       |             |             |              |          |          |            |       |
| ME3FURAN        |         |              |         | AIR     |            |              | ON       | ON        | ON      | ON       |        | ON     |       |             |             |              |          |          |            |       |
| MBOACO          |         |              |         | AIR     |            |              | ON       | ON        | ON      | ON       |        | ON     |       |             |             |              |          |          |            |       |
| MBOCOCO         |         |              |         | AIR     |            |              | ON       | ON        | ON      | ON       |        | ON     |       |             |             |              |          |          |            |       |
| MBO             |         |              |         | AIR     |            |              | ON       | ON        | ON      | ON       |        | ON     |       |             |             |              |          |          |            |       |
| CHOC3COPAN      |         |              |         | AIR     |            |              | ON       | ON        | ON      | ON       |        | ON     |       |             |             |              |          |          |            |       |
| C5PAN9          |         |              |         | AIR     |            |              | ON       | ON        | ON      | ON       |        | ON     |       |             |             |              |          |          |            |       |
| C514NO3         |         |              |         | AIR     |            |              | ON       | ON        | ON      | ON       |        | ON     |       |             |             |              |          |          |            |       |
| LIEPOX          |         |              |         | AIR     |            |              | ON       | ON        | ON      | ON       |        | ON     |       |             |             |              |          |          |            |       |
| DB1OOH          |         |              |         | AIR     |            |              | ON       | ON        | ON      | ON       |        | ON     |       |             |             |              |          |          |            |       |
| DB1NO3          |         |              |         | AIR     |            |              | ON       | ON        | ON      | ON       |        | ON     |       |             |             |              |          |          |            |       |
| DB2OOH          |         |              |         | AIR     |            |              | ON       | ON        | ON      | ON       |        | ON     |       |             |             |              |          |          |            |       |
| C4MDIAL         |         |              |         | AIR     |            |              | ON       | ON        | ON      | ON       |        | ON     |       |             |             |              |          |          |            |       |
| LZCO3HC23DBCOD  |         |              |         | AIR     |            |              | ON       | ON        | ON      | ON       |        | ON     |       |             |             |              |          |          |            |       |
| LZCO3C23DBCOD   |         |              |         | AIR     |            |              | OFF      | OFF       | OFF     |          |        |        |       |             |             |              |          |          |            |       |
| LZCPANC23DBCOD  |         |              |         | AIR     |            |              | ON       | ON        | ON      | ON       |        | ON     |       |             |             |              |          |          |            |       |
| C1OOHC2OOHC4OD  |         |              |         | AIR     |            |              | ON       | ON        | ON      | ON       |        | ON     |       |             |             |              |          |          |            |       |
| C1ODC2OOHC4OD   |         |              |         | AIR     |            |              | ON       | ON        | ON      | ON       |        | ON     |       |             |             |              |          |          |            |       |
| C1OOHC3O2C4OD   |         |              |         | AIR     |            |              | OFF      | OFF       | OFF     |          |        | OFF    |       |             |             |              |          |          |            |       |
| C1OOHC2O2C4OD   |         |              |         | AIR     |            |              | OFF      | OFF       | OFF     |          |        | OFF    |       |             |             |              |          |          |            |       |
| NC4OHCO3H       |         |              |         | AIR     |            |              | ON       | ON        | ON      | ON       |        | ON     |       |             |             |              |          |          |            |       |
| NC4OHCPAN       |         |              |         | AIR     |            |              | ON       | ON        | ON      | ON       |        | ON     |       |             |             |              |          |          |            |       |
| NMBOBCO         |         |              |         | AIR     |            |              | ON       | ON        | ON      | ON       |        | ON     |       |             |             |              |          |          |            |       |
| C4MCONO3OH      |         |              |         | AIR     |            |              | ON       | ON        | ON      | ON       |        | ON     |       |             |             |              |          |          |            |       |
| C4PAN5          |         |              |         | AIR     |            |              | ON       | ON        | ON      | ON       |        | ON     |       |             |             |              |          |          |            |       |
| LNMBOABOOH      |         |              |         | AIR     |            |              | ON       | ON        | ON      | ON       |        | ON     |       |             |             |              |          |          |            |       |
| LMBOABNO3       |         |              |         | AIR     |            |              | ON       | ON        | ON      | ON       |        | ON     |       |             |             |              |          |          |            |       |
| LMBOABOOH       |         |              |         | AIR     |            |              | ON       | ON        | ON      | ON       |        | ON     |       |             |             |              |          |          |            |       |
| NC4MDCO2H       |         |              |         | AIR     |            |              | ON       | ON        | ON      | ON       |        | ON     |       |             |             |              |          |          |            |       |
| C54CO           |         |              |         | AIR     |            |              | ON       | ON        | ON      | ON       |        | ON     |       |             |             |              |          |          |            |       |
| NTLFUO2         |         |              |         | AIR     |            |              | OFF      | OFF       | OFF     | OFF      |        | OFF    |       |             |             |              |          |          |            |       |
| C5134CO2OH      |         |              |         | AIR     |            |              | ON       | ON        | ON      | ON       |        | ON     |       |             |             |              |          |          |            |       |
| C5COO2NO2       |         |              |         | AIR     |            |              | ON       | ON        | ON      | ON       |        | ON     |       |             |             |              |          |          |            |       |
| C5DIALOOH       |         |              |         | AIR     |            |              | ON       | ON        | ON      | ON       |        | ON     |       |             |             |              |          |          |            |       |
| C4CO2DBCO3      |         |              |         | AIR     |            |              | OFF      | OFF       | OFF     | OFF      |        | OFF    |       |             |             |              |          |          |            |       |
| MMALANHY        |         |              |         | AIR     |            |              | ON       | ON        | ON      | ON       |        | ON     |       |             |             |              |          |          |            |       |
| PXYFUO2         |         |              |         | AIR     |            |              | OFF      | OFF       | OFF     | OFF      |        | OFF    |       |             |             |              |          |          |            |       |
| MMALANHYO2      |         |              |         | AIR     |            |              | OFF      | OFF       | OFF     | OFF      |        | OFF    |       |             |             |              |          |          |            |       |
| NPXYFUOOH       |         |              |         | AIR     |            |              | ON       | ON        | ON      | ON       |        | ON     |       |             |             |              |          |          |            |       |
| C4CO2DBPAN      |         |              |         | AIR     |            |              | ON       | ON        | ON      | ON       |        | ON     |       |             |             |              |          |          |            |       |
| C5CO14O2        |         |              |         | AIR     |            |              | OFF      | OFF       | OFF     | OFF      |        | OFF    |       |             |             |              |          |          |            |       |
| PXYFUOOH        |         |              |         | AIR     |            |              | ON       | ON        | ON      | ON       |        | ON     |       |             |             |              |          |          |            |       |
| MC3CODBPAN      |         |              |         | AIR     |            |              | ON       | ON        | ON      | ON       |        | ON     |       |             |             |              |          |          |            |       |
| C5CO14OH        |         |              |         | AIR     |            |              | ON       | ON        | ON      | ON       |        | ON     |       |             |             |              |          |          |            |       |
| NPXYFUO2        |         |              |         | AIR     |            |              | OFF      | OFF       | OFF     | OFF      |        | OFF    |       |             |             |              |          |          |            |       |
| C5DICARB        |         |              |         | AIR     |            |              | ON       | ON        | ON      | ON       |        | ON     |       |             |             |              |          |          |            |       |
| MC3ODBCO2H      |         |              |         | AIR     |            |              | ON       | ON        | ON      | ON       |        | ON     |       |             |             |              |          |          |            |       |
| TLFUONE         |         |              |         | AIR     |            |              | ON       | ON        | ON      | ON       |        | ON     |       |             |             |              |          |          |            |       |
| ACCOMECO3       |         |              |         | AIR     |            |              | OFF      | OFF       | OFF     | OFF      |        | OFF    |       |             |             |              |          |          |            |       |
| C4CO2DCO3H      |         |              |         | AIR     |            |              | ON       | ON        | ON      | ON       |        | ON     |       |             |             |              |          |          |            |       |
| EPXDLPAN        |         |              |         | AIR     |            |              | ON       | ON        | ON      | ON       |        | ON     |       |             |             |              |          |          |            |       |
| ACCOMECHO       |         |              |         | AIR     |            |              | ON       | ON        | ON      | ON       |        | ON     |       |             |             |              |          |          |            |       |
| MMALNHYOOH      |         |              |         | AIR     |            |              | ON       | ON        | ON      | ON       |        | ON     |       |             |             |              |          |          |            |       |
| C5DICAROOH      |         |              |         | AIR     |            |              | ON       | ON        | ON      | ON       |        | ON     |       |             |             |              |          |          |            |       |
| C24O3CCO2H      |         |              |         | AIR     |            |              | ON       | ON        | ON      | ON       |        | ON     |       |             |             |              |          |          |            |       |
| NTLFUOOH        |         |              |         | AIR     |            |              | ON       | ON        | ON      | ON       |        | ON     |       |             |             |              |          |          |            |       |
| MECOACEOOH      |         |              |         | AIR     |            |              | ON       | ON        | ON      | ON       |        | ON     |       |             |             |              |          |          |            |       |
| ACCOMEPAN       |         |              |         | AIR     |            |              | ON       | ON        | ON      | ON       |        | ON     |       |             |             |              |          |          |            |       |
| PXYFUONE        |         |              |         | AIR     |            |              | ON       | ON        | ON      | ON       |        | ON     |       |             |             |              |          |          |            |       |
| TLFUO2          |         |              |         | AIR     |            |              | OFF      | OFF       | OFF     | OFF      |        | OFF    |       |             |             |              |          |          |            |       |
| C5CO14OOH       |         |              |         | AIR     |            |              | ON       | ON        | ON      | ON       |        | ON     |       |             |             |              |          |          |            |       |
| TLFUOOH         |         |              |         | AIR     |            |              | ON       | ON        | ON      | ON       |        | ON     |       |             |             |              |          |          |            |       |
| MC3ODBCO3H      |         |              |         | AIR     |            |              | ON       | ON        | ON      | ON       |        | ON     |       |             |             |              |          |          |            |       |
| ACCOMECO3H      |         |              |         | AIR     |            |              | ON       | ON        | ON      | ON       |        | ON     |       |             |             |              |          |          |            |       |
| C5DIALO2        |         |              |         | AIR     |            |              | OFF      | OFF       | OFF     | OFF      |        | OFF    |       |             |             |              |          |          |            |       |
|-----------------+---------+--------------+---------+---------+------------+--------------+----------+-----------+---------+----------+--------+--------+-------+-------------+-------------+--------------+----------+----------+------------+-------|
| CO235C5CHO      |         |              |         | AIR     |            |              | ON       | ON        | ON      | ON       |        | ON     |       |             |             |              |          |          |            |       |
| CO235C6O2       |         |              |         | AIR     |            |              | OFF      | OFF       | OFF     |          |        | OFF    |       |             |             |              |          |          |            |       |
| C614CO          |         |              |         | AIR     |            |              | ON       | ON        | ON      | ON       |        | ON     |       |             |             |              |          |          |            |       |
| CO235C6OOH      |         |              |         | AIR     |            |              | ON       | ON        | ON      | ON       |        | ON     |       |             |             |              |          |          |            |       |
| C614O2          |         |              |         | AIR     |            |              | OFF      | OFF       | OFF     |          |        | OFF    |       |             |             |              |          |          |            |       |
| C614OOH         |         |              |         | AIR     |            |              | ON       | ON        | ON      | ON       |        | ON     |       |             |             |              |          |          |            |       |
| C614NO3         |         |              |         | AIR     |            |              | ON       | ON        | ON      | ON       |        | ON     |       |             |             |              |          |          |            |       |
| PHENOOH         |         |              |         | AIR     |            |              | ON       | ON        | ON      | ON       |        | ON     |       |             |             |              |          |          |            |       |
| C6CO4DB         |         |              |         | AIR     |            |              | ON       | ON        | ON      | ON       |        | ON     |       |             |             |              |          |          |            |       |
| C5CO2DCO3H      |         |              |         | AIR     |            |              | ON       | ON        | ON      | ON       |        | ON     |       |             |             |              |          |          |            |       |
| NDNPHENOOH      |         |              |         | AIR     |            |              | ON       | ON        | ON      | ON       |        | ON     |       |             |             |              |          |          |            |       |
| C615CO2O2       |         |              |         | AIR     |            |              | OFF      | OFF       | OFF     | OFF      |        | OFF    |       |             |             |              |          |          |            |       |
| BZEMUCPAN       |         |              |         | AIR     |            |              | ON       | ON        | ON      | ON       |        | ON     |       |             |             |              |          |          |            |       |
| BZBIPERNO3      |         |              |         | AIR     |            |              | ON       | ON        | ON      | ON       |        | ON     |       |             |             |              |          |          |            |       |
| HOC6H4NO2       |         |              |         | AIR     |            |              | ON       | ON        | ON      | ON       |        | ON     |       |             |             |              |          |          |            |       |
| NDNPHENO2       |         |              |         | AIR     |            |              | OFF      | OFF       | OFF     | OFF      |        | OFF    |       |             |             |              |          |          |            |       |
| PBZQCO          |         |              |         | AIR     |            |              | ON       | ON        | ON      | ON       |        | ON     |       |             |             |              |          |          |            |       |
| CATECHOL        |         |              |         | AIR     |            |              | ON       | ON        | ON      | ON       |        | ON     |       |             |             |              |          |          |            |       |
| C5COOHCO3H      |         |              |         | AIR     |            |              | ON       | ON        | ON      | ON       |        | ON     |       |             |             |              |          |          |            |       |
| NCATECHOL       |         |              |         | AIR     |            |              | ON       | ON        | ON      | ON       |        | ON     |       |             |             |              |          |          |            |       |
| C5CO2OHCO3      |         |              |         | AIR     |            |              | OFF      | OFF       | OFF     | OFF      |        | OFF    |       |             |             |              |          |          |            |       |
| BZEPOXMUC       |         |              |         | AIR     |            |              | ON       | ON        | ON      | ON       |        | ON     |       |             |             |              |          |          |            |       |
| NCATECO2        |         |              |         | AIR     |            |              | OFF      | OFF       | OFF     | OFF      |        | OFF    |       |             |             |              |          |          |            |       |
| NPHEN1OOH       |         |              |         | AIR     |            |              | ON       | ON        | ON      | ON       |        | ON     |       |             |             |              |          |          |            |       |
| NPHENO2         |         |              |         | AIR     |            |              | OFF      | OFF       | OFF     | OFF      |        | OFF    |       |             |             |              |          |          |            |       |
| BENZENE         |         |              |         | AIR     |            |              | ON       | ON        | ON      | ON       |        | ON     |       |             |             |              |          |          |            |       |
| C5CO2OHPAN      |         |              |         | AIR     |            |              | ON       | ON        | ON      | ON       |        | ON     |       |             |             |              |          |          |            |       |
| CATEC1O         |         |              |         | AIR     |            |              | ON       | ON        | ON      | ON       |        | ON     |       |             |             |              |          |          |            |       |
| BZEMUCCO        |         |              |         | AIR     |            |              | ON       | ON        | ON      | ON       |        | ON     |       |             |             |              |          |          |            |       |
| NNCATECO2       |         |              |         | AIR     |            |              | OFF      | OFF       | OFF     | OFF      |        | OFF    |       |             |             |              |          |          |            |       |
| BZEMUCCO2H      |         |              |         | AIR     |            |              | ON       | ON        | ON      | ON       |        | ON     |       |             |             |              |          |          |            |       |
| NNCATECOOH      |         |              |         | AIR     |            |              | ON       | ON        | ON      | ON       |        | ON     |       |             |             |              |          |          |            |       |
| NPHEN1O         |         |              |         | AIR     |            |              | ON       | ON        | ON      | ON       |        | ON     |       |             |             |              |          |          |            |       |
| DNPHEN          |         |              |         | AIR     |            |              | ON       | ON        | ON      | ON       |        | ON     |       |             |             |              |          |          |            |       |
| PHENOL          |         |              |         | AIR     |            |              | ON       | ON        | ON      | ON       |        | ON     |       |             |             |              |          |          |            |       |
| PBZQONE         |         |              |         | AIR     |            |              | ON       | ON        | ON      | ON       |        | ON     |       |             |             |              |          |          |            |       |
| PHENO2          |         |              |         | AIR     |            |              | OFF      | OFF       | OFF     | OFF      |        | OFF    |       |             |             |              |          |          |            |       |
| BZBIPERO2       |         |              |         | AIR     |            |              | OFF      | OFF       | OFF     | OFF      |        | OFF    |       |             |             |              |          |          |            |       |
| C615CO2OOH      |         |              |         | AIR     |            |              | ON       | ON        | ON      | ON       |        | ON     |       |             |             |              |          |          |            |       |
| C5CO2DBCO3      |         |              |         | AIR     |            |              | OFF      | OFF       | OFF     | OFF      |        | OFF    |       |             |             |              |          |          |            |       |
| NPHEN1O2        |         |              |         | AIR     |            |              | OFF      | OFF       | OFF     | OFF      |        | OFF    |       |             |             |              |          |          |            |       |
| NPHENOOH        |         |              |         | AIR     |            |              | ON       | ON        | ON      | ON       |        | ON     |       |             |             |              |          |          |            |       |
| C6H5O           |         |              |         | AIR     |            |              | ON       | ON        | ON      | ON       |        | ON     |       |             |             |              |          |          |            |       |
| NCATECOOH       |         |              |         | AIR     |            |              | ON       | ON        | ON      | ON       |        | ON     |       |             |             |              |          |          |            |       |
| PBZQOOH         |         |              |         | AIR     |            |              | ON       | ON        | ON      | ON       |        | ON     |       |             |             |              |          |          |            |       |
| PBZQO2          |         |              |         | AIR     |            |              | OFF      | OFF       | OFF     | OFF      |        | OFF    |       |             |             |              |          |          |            |       |
| BZOBIPEROH      |         |              |         | AIR     |            |              | ON       | ON        | ON      | ON       |        | ON     |       |             |             |              |          |          |            |       |
| DNPHENO2        |         |              |         | AIR     |            |              | OFF      | OFF       | OFF     | OFF      |        | OFF    |       |             |             |              |          |          |            |       |
| BZBIPEROOH      |         |              |         | AIR     |            |              | ON       | ON        | ON      | ON       |        | ON     |       |             |             |              |          |          |            |       |
| BZEMUCO2        |         |              |         | AIR     |            |              | OFF      | OFF       | OFF     | OFF      |        | OFF    |       |             |             |              |          |          |            |       |
| C5CO2DBPAN      |         |              |         | AIR     |            |              | ON       | ON        | ON      | ON       |        | ON     |       |             |             |              |          |          |            |       |
| NBZQOOH         |         |              |         | AIR     |            |              | ON       | ON        | ON      | ON       |        | ON     |       |             |             |              |          |          |            |       |
| CATEC1OOH       |         |              |         | AIR     |            |              | ON       | ON        | ON      | ON       |        | ON     |       |             |             |              |          |          |            |       |
| C6125CO         |         |              |         | AIR     |            |              | ON       | ON        | ON      | ON       |        | ON     |       |             |             |              |          |          |            |       |
| NBZQO2          |         |              |         | AIR     |            |              | OFF      | OFF       | OFF     | OFF      |        | OFF    |       |             |             |              |          |          |            |       |
| DNPHENOOH       |         |              |         | AIR     |            |              | ON       | ON        | ON      | ON       |        | ON     |       |             |             |              |          |          |            |       |
| CATEC1O2        |         |              |         | AIR     |            |              | OFF      | OFF       | OFF     | OFF      |        | OFF    |       |             |             |              |          |          |            |       |
| BZEMUCCO3H      |         |              |         | AIR     |            |              | ON       | ON        | ON      | ON       |        | ON     |       |             |             |              |          |          |            |       |
| C6H5OOH         |         |              |         | AIR     |            |              | ON       | ON        | ON      | ON       |        | ON     |       |             |             |              |          |          |            |       |
| BZEMUCOOH       |         |              |         | AIR     |            |              | ON       | ON        | ON      | ON       |        | ON     |       |             |             |              |          |          |            |       |
| BZEMUCCO3       |         |              |         | AIR     |            |              | OFF      | OFF       | OFF     | OFF      |        | OFF    |       |             |             |              |          |          |            |       |
| C6H5O2          |         |              |         | AIR     |            |              | OFF      | OFF       | OFF     | OFF      |        | OFF    |       |             |             |              |          |          |            |       |
| BZEMUCOH        |         |              |         | AIR     |            |              | ON       | ON        | ON      | ON       |        | ON     |       |             |             |              |          |          |            |       |
| BZEMUCNO3       |         |              |         | AIR     |            |              | ON       | ON        | ON      | ON       |        | ON     |       |             |             |              |          |          |            |       |
| CPDKETENE       |         |              |         | AIR     |            |              | ON       | ON        | ON      | OFF      |        | OFF    |       |             |             |              |          |          |            |       |
| NCPDKETENE      |         |              |         | AIR     |            |              | ON       | ON        | ON      | OFF      |        | OFF    |       |             |             |              |          |          |            |       |
|-----------------+---------+--------------+---------+---------+------------+--------------+----------+-----------+---------+----------+--------+--------+-------+-------------+-------------+--------------+----------+----------+------------+-------|
| CO235C6CO3      |         |              |         | AIR     |            |              | OFF      | OFF       | OFF     |          |        | OFF    |       |             |             |              |          |          |            |       |
| CO235C6CHO      |         |              |         | AIR     |            |              | ON       | ON        | ON      | ON       |        | ON     |       |             |             |              |          |          |            |       |
| C235C6CO3H      |         |              |         | AIR     |            |              | ON       | ON        | ON      | ON       |        | ON     |       |             |             |              |          |          |            |       |
| C716O2          |         |              |         | AIR     |            |              | OFF      | OFF       | OFF     |          |        | OFF    |       |             |             |              |          |          |            |       |
| C716OOH         |         |              |         | AIR     |            |              | ON       | ON        | ON      | ON       |        | ON     |       |             |             |              |          |          |            |       |
| ROO6R4P         |         |              |         | AIR     |            |              | ON       | ON        | ON      | ON       |        | ON     |       |             |             |              |          |          |            |       |
| ROO6R5P         |         |              |         | AIR     |            |              | ON       | ON        | ON      | ON       |        | ON     |       |             |             |              |          |          |            |       |
| ROO6R3O         |         |              |         | AIR     |            |              | OFF      | OFF       | OFF     |          |        | OFF    |       |             |             |              |          |          |            |       |
| C721O2          |         |              |         | AIR     |            |              | OFF      | OFF       | OFF     |          |        | OFF    |       |             |             |              |          |          |            |       |
| C722O2          |         |              |         | AIR     |            |              | OFF      | OFF       | OFF     |          |        | OFF    |       |             |             |              |          |          |            |       |
| ROO6R3O2        |         |              |         | AIR     |            |              | OFF      | OFF       | OFF     |          |        | OFF    |       |             |             |              |          |          |            |       |
| ROO6R5O2        |         |              |         | AIR     |            |              | OFF      | OFF       | OFF     |          |        | OFF    |       |             |             |              |          |          |            |       |
| C721OOH         |         |              |         | AIR     |            |              | ON       | ON        | ON      | ON       |        | ON     |       |             |             |              |          |          |            |       |
| C722OOH         |         |              |         | AIR     |            |              | ON       | ON        | ON      | ON       |        | ON     |       |             |             |              |          |          |            |       |
| ROO6R3OOH       |         |              |         | AIR     |            |              | ON       | ON        | ON      | ON       |        | ON     |       |             |             |              |          |          |            |       |
| C7PAN3          |         |              |         | AIR     |            |              | ON       | ON        | ON      | ON       |        | ON     |       |             |             |              |          |          |            |       |
| ROO6R3NO3       |         |              |         | AIR     |            |              | ON       | ON        | ON      | ON       |        | ON     |       |             |             |              |          |          |            |       |
| PTLQOH          |         |              |         | AIR     |            |              | ON       | ON        | ON      | ON       |        | ON     |       |             |             |              |          |          |            |       |
| OXYL1O2         |         |              |         | AIR     |            |              | OFF      | OFF       | OFF     | OFF      |        | OFF    |       |             |             |              |          |          |            |       |
| TOLUENE         |         |              |         | AIR     |            |              | ON       | ON        | ON      | ON       |        | ON     |       |             |             |              |          |          |            |       |
| NDNCRESO2       |         |              |         | AIR     |            |              | OFF      | OFF       | OFF     | OFF      |        | OFF    |       |             |             |              |          |          |            |       |
| TLEMUCNO3       |         |              |         | AIR     |            |              | ON       | ON        | ON      | ON       |        | ON     |       |             |             |              |          |          |            |       |
| CRESO2          |         |              |         | AIR     |            |              | OFF      | OFF       | OFF     | OFF      |        | OFF    |       |             |             |              |          |          |            |       |
| PTLQO2          |         |              |         | AIR     |            |              | OFF      | OFF       | OFF     | OFF      |        | OFF    |       |             |             |              |          |          |            |       |
| MCATEC1O2       |         |              |         | AIR     |            |              | OFF      | OFF       | OFF     | OFF      |        | OFF    |       |             |             |              |          |          |            |       |
| C6H5CH2OOH      |         |              |         | AIR     |            |              | ON       | ON        | ON      | ON       |        | ON     |       |             |             |              |          |          |            |       |
| TOL1OHNO2       |         |              |         | AIR     |            |              | ON       | ON        | ON      | ON       |        | ON     |       |             |             |              |          |          |            |       |
| TLEMUCO2        |         |              |         | AIR     |            |              | OFF      | OFF       | OFF     | OFF      |        | OFF    |       |             |             |              |          |          |            |       |
| CRESOL          |         |              |         | AIR     |            |              | ON       | ON        | ON      | ON       |        | ON     |       |             |             |              |          |          |            |       |
| TLBIPER2OH      |         |              |         | AIR     |            |              | ON       | ON        | ON      | ON       |        | ON     |       |             |             |              |          |          |            |       |
| MNCATECH        |         |              |         | AIR     |            |              | ON       | ON        | ON      | ON       |        | ON     |       |             |             |              |          |          |            |       |
| NCRES1O         |         |              |         | AIR     |            |              | ON       | ON        | ON      | ON       |        | ON     |       |             |             |              |          |          |            |       |
| TOL1O           |         |              |         | AIR     |            |              | ON       | ON        | ON      | ON       |        | ON     |       |             |             |              |          |          |            |       |
| MNNCATECO2      |         |              |         | AIR     |            |              | OFF      | OFF       | OFF     | OFF      |        | OFF    |       |             |             |              |          |          |            |       |
| NCRES1OOH       |         |              |         | AIR     |            |              | ON       | ON        | ON      | ON       |        | ON     |       |             |             |              |          |          |            |       |
| PTLQCO          |         |              |         | AIR     |            |              | ON       | ON        | ON      | ON       |        | ON     |       |             |             |              |          |          |            |       |
| C6H5CH2O2       |         |              |         | AIR     |            |              | OFF      | OFF       | OFF     | OFF      |        | OFF    |       |             |             |              |          |          |            |       |
| TLBIPERO2       |         |              |         | AIR     |            |              | OFF      | OFF       | OFF     | OFF      |        | OFF    |       |             |             |              |          |          |            |       |
| TLBIPERNO3      |         |              |         | AIR     |            |              | ON       | ON        | ON      | ON       |        | ON     |       |             |             |              |          |          |            |       |
| TLEMUCOH        |         |              |         | AIR     |            |              | ON       | ON        | ON      | ON       |        | ON     |       |             |             |              |          |          |            |       |
| NCRESOOH        |         |              |         | AIR     |            |              | ON       | ON        | ON      | ON       |        | ON     |       |             |             |              |          |          |            |       |
| TLBIPEROOH      |         |              |         | AIR     |            |              | ON       | ON        | ON      | ON       |        | ON     |       |             |             |              |          |          |            |       |
| MNCATECOOH      |         |              |         | AIR     |            |              | ON       | ON        | ON      | ON       |        | ON     |       |             |             |              |          |          |            |       |
| NPTLQOOH        |         |              |         | AIR     |            |              | ON       | ON        | ON      | ON       |        | ON     |       |             |             |              |          |          |            |       |
| C6H5CO3H        |         |              |         | AIR     |            |              | ON       | ON        | ON      | ON       |        | ON     |       |             |             |              |          |          |            |       |
| NCRESO2         |         |              |         | AIR     |            |              | OFF      | OFF       | OFF     | OFF      |        | OFF    |       |             |             |              |          |          |            |       |
| TLEMUCCO2H      |         |              |         | AIR     |            |              | ON       | ON        | ON      | ON       |        | ON     |       |             |             |              |          |          |            |       |
| PBZN            |         |              |         | AIR     |            |              | ON       | ON        | ON      | ON       |        | ON     |       |             |             |              |          |          |            |       |
| TLEPOXMUC       |         |              |         | AIR     |            |              | ON       | ON        | ON      | ON       |        | ON     |       |             |             |              |          |          |            |       |
| MCATEC1O        |         |              |         | AIR     |            |              | ON       | ON        | ON      | ON       |        | ON     |       |             |             |              |          |          |            |       |
| MNNCATCOOH      |         |              |         | AIR     |            |              | ON       | ON        | ON      | ON       |        | ON     |       |             |             |              |          |          |            |       |
| PHCOOH          |         |              |         | AIR     |            |              | ON       | ON        | ON      | ON       |        | ON     |       |             |             |              |          |          |            |       |
| PTLQONE         |         |              |         | AIR     |            |              | ON       | ON        | ON      | ON       |        | ON     |       |             |             |              |          |          |            |       |
| BENZAL          |         |              |         | AIR     |            |              | ON       | ON        | ON      | ON       |        | ON     |       |             |             |              |          |          |            |       |
| MCATECHOL       |         |              |         | AIR     |            |              | ON       | ON        | ON      | ON       |        | ON     |       |             |             |              |          |          |            |       |
| PTLQOOH         |         |              |         | AIR     |            |              | ON       | ON        | ON      | ON       |        | ON     |       |             |             |              |          |          |            |       |
| MNCATECO2       |         |              |         | AIR     |            |              | OFF      | OFF       | OFF     | OFF      |        | OFF    |       |             |             |              |          |          |            |       |
| C6CO2OHPAN      |         |              |         | AIR     |            |              | ON       | ON        | ON      | ON       |        | ON     |       |             |             |              |          |          |            |       |
| DNCRESOOH       |         |              |         | AIR     |            |              | ON       | ON        | ON      | ON       |        | ON     |       |             |             |              |          |          |            |       |
| CRESOOH         |         |              |         | AIR     |            |              | ON       | ON        | ON      | ON       |        | ON     |       |             |             |              |          |          |            |       |
| C6CO2OHCO3      |         |              |         | AIR     |            |              | OFF      | OFF       | OFF     | OFF      |        | OFF    |       |             |             |              |          |          |            |       |
| MCATEC1OOH      |         |              |         | AIR     |            |              | ON       | ON        | ON      | ON       |        | ON     |       |             |             |              |          |          |            |       |
| TLEMUCPAN       |         |              |         | AIR     |            |              | ON       | ON        | ON      | ON       |        | ON     |       |             |             |              |          |          |            |       |
| C6COOHCO3H      |         |              |         | AIR     |            |              | ON       | ON        | ON      | ON       |        | ON     |       |             |             |              |          |          |            |       |
| C6H5CH2NO3      |         |              |         | AIR     |            |              | ON       | ON        | ON      | ON       |        | ON     |       |             |             |              |          |          |            |       |
| TLEMUCCO        |         |              |         | AIR     |            |              | ON       | ON        | ON      | ON       |        | ON     |       |             |             |              |          |          |            |       |
| OXYL1OOH        |         |              |         | AIR     |            |              | ON       | ON        | ON      | ON       |        | ON     |       |             |             |              |          |          |            |       |
| NDNCRESOOH      |         |              |         | AIR     |            |              | ON       | ON        | ON      | ON       |        | ON     |       |             |             |              |          |          |            |       |
| TLEMUCCO3       |         |              |         | AIR     |            |              | OFF      | OFF       | OFF     | OFF      |        | OFF    |       |             |             |              |          |          |            |       |
| TLEMUCOOH       |         |              |         | AIR     |            |              | ON       | ON        | ON      | ON       |        | ON     |       |             |             |              |          |          |            |       |
| TLOBIPEROH      |         |              |         | AIR     |            |              | ON       | ON        | ON      | ON       |        | ON     |       |             |             |              |          |          |            |       |
| NCRES1O2        |         |              |         | AIR     |            |              | OFF      | OFF       | OFF     | OFF      |        | OFF    |       |             |             |              |          |          |            |       |
| NPTLQO2         |         |              |         | AIR     |            |              | OFF      | OFF       | OFF     | OFF      |        | OFF    |       |             |             |              |          |          |            |       |
| DNCRESO2        |         |              |         | AIR     |            |              | OFF      | OFF       | OFF     | OFF      |        | OFF    |       |             |             |              |          |          |            |       |
| C6H5CO3         |         |              |         | AIR     |            |              | OFF      | OFF       | OFF     | OFF      |        | OFF    |       |             |             |              |          |          |            |       |
| DNCRES          |         |              |         | AIR     |            |              | ON       | ON        | ON      | ON       |        | ON     |       |             |             |              |          |          |            |       |
| TLEMUCCO3H      |         |              |         | AIR     |            |              | ON       | ON        | ON      | ON       |        | ON     |       |             |             |              |          |          |            |       |
| C7CO4DB         |         |              |         | AIR     |            |              | ON       | ON        | ON      | ON       |        | ON     |       |             |             |              |          |          |            |       |
| MCPDKETENE      |         |              |         | AIR     |            |              | ON       | ON        | ON      | OFF      |        | OFF    |       |             |             |              |          |          |            |       |
| MNCPDKETENE     |         |              |         | AIR     |            |              | ON       | ON        | ON      | OFF      |        | OFF    |       |             |             |              |          |          |            |       |
|-----------------+---------+--------------+---------+---------+------------+--------------+----------+-----------+---------+----------+--------+--------+-------+-------------+-------------+--------------+----------+----------+------------+-------|
| C8BCO2          |         |              |         | AIR     |            |              | OFF      | OFF       | OFF     |          |        | OFF    |       |             |             |              |          |          |            |       |
| C721CO3         |         |              |         | AIR     |            |              | OFF      | OFF       | OFF     |          |        | OFF    |       |             |             |              |          |          |            |       |
| C85O2           |         |              |         | AIR     |            |              | OFF      | OFF       | OFF     |          |        | OFF    |       |             |             |              |          |          |            |       |
| C89O2           |         |              |         | AIR     |            |              | OFF      | OFF       | OFF     |          |        | OFF    |       |             |             |              |          |          |            |       |
| C811O2          |         |              |         | AIR     |            |              | OFF      | OFF       | OFF     |          |        | OFF    |       |             |             |              |          |          |            |       |
| C86O2           |         |              |         | AIR     |            |              | OFF      | OFF       | OFF     |          |        | OFF    |       |             |             |              |          |          |            |       |
| C812O2          |         |              |         | AIR     |            |              | OFF      | OFF       | OFF     |          |        | OFF    |       |             |             |              |          |          |            |       |
| C813O2          |         |              |         | AIR     |            |              | OFF      | OFF       | OFF     |          |        | OFF    |       |             |             |              |          |          |            |       |
| C810O2          |         |              |         | AIR     |            |              | OFF      | OFF       | OFF     |          |        | OFF    |       |             |             |              |          |          |            |       |
| C8BCCO          |         |              |         | AIR     |            |              | ON       | ON        | ON      | ON       |        | ON     |       |             |             |              |          |          |            |       |
| C8BCOOH         |         |              |         | AIR     |            |              | ON       | ON        | ON      | ON       |        | ON     |       |             |             |              |          |          |            |       |
| C721CHO         |         |              |         | AIR     |            |              | ON       | ON        | ON      | ON       |        | ON     |       |             |             |              |          |          |            |       |
| NORPINIC        |         |              |         | AIR     |            |              | ON       | ON        | ON      | ON       |        | ON     |       |             |             |              |          |          |            |       |
| C721CO3H        |         |              |         | AIR     |            |              | ON       | ON        | ON      | ON       |        | ON     |       |             |             |              |          |          |            |       |
| C8BC            |         |              |         | AIR     |            |              | ON       | ON        | ON      | ON       |        | ON     |       |             |             |              |          |          |            |       |
| C85OOH          |         |              |         | AIR     |            |              | ON       | ON        | ON      | ON       |        | ON     |       |             |             |              |          |          |            |       |
| C86OOH          |         |              |         | AIR     |            |              | ON       | ON        | ON      | ON       |        | ON     |       |             |             |              |          |          |            |       |
| C812OOH         |         |              |         | AIR     |            |              | ON       | ON        | ON      | ON       |        | ON     |       |             |             |              |          |          |            |       |
| C813OOH         |         |              |         | AIR     |            |              | ON       | ON        | ON      | ON       |        | ON     |       |             |             |              |          |          |            |       |
| C89OOH          |         |              |         | AIR     |            |              | ON       | ON        | ON      | ON       |        | ON     |       |             |             |              |          |          |            |       |
| C810OOH         |         |              |         | AIR     |            |              | ON       | ON        | ON      | ON       |        | ON     |       |             |             |              |          |          |            |       |
| C8BCNO3         |         |              |         | AIR     |            |              | ON       | ON        | ON      | ON       |        | ON     |       |             |             |              |          |          |            |       |
| C721PAN         |         |              |         | AIR     |            |              | ON       | ON        | ON      | ON       |        | ON     |       |             |             |              |          |          |            |       |
| C89NO3          |         |              |         | AIR     |            |              | ON       | ON        | ON      | ON       |        | ON     |       |             |             |              |          |          |            |       |
| C810NO3         |         |              |         | AIR     |            |              | ON       | ON        | ON      | ON       |        | ON     |       |             |             |              |          |          |            |       |
| LXYL            |         |              |         | AIR     |            |              | ON       | ON        | ON      | ON       |        | ON     |       |             |             |              |          |          |            |       |
| EBENZ           |         |              |         | AIR     |            |              | ON       | ON        | ON      | ON       |        | ON     |       |             |             |              |          |          |            |       |
| STYRENE         |         |              |         | AIR     |            |              | ON       | ON        | ON      | ON       |        | ON     |       |             |             |              |          |          |            |       |
| NSTYRENO2       |         |              |         | AIR     |            |              | OFF      | OFF       | OFF     | OFF      |        | OFF    |       |             |             |              |          |          |            |       |
| NSTYRENOOH      |         |              |         | AIR     |            |              | ON       | ON        | ON      | ON       |        | ON     |       |             |             |              |          |          |            |       |
| STYRENOOH       |         |              |         | AIR     |            |              | ON       | ON        | ON      | ON       |        | ON     |       |             |             |              |          |          |            |       |
| STYRENO2        |         |              |         | AIR     |            |              | OFF      | OFF       | OFF     | OFF      |        | OFF    |       |             |             |              |          |          |            |       |
|-----------------+---------+--------------+---------+---------+------------+--------------+----------+-----------+---------+----------+--------+--------+-------+-------------+-------------+--------------+----------+----------+------------+-------|
| C85CO3          |         |              |         | AIR     |            |              | OFF      | OFF       | OFF     |          |        | OFF    |       |             |             |              |          |          |            |       |
| C89CO3          |         |              |         | AIR     |            |              | OFF      | OFF       | OFF     |          |        | OFF    |       |             |             |              |          |          |            |       |
| C811CO3         |         |              |         | AIR     |            |              | OFF      | OFF       | OFF     |          |        | OFF    |       |             |             |              |          |          |            |       |
| NOPINDO2        |         |              |         | AIR     |            |              | OFF      | OFF       | OFF     |          |        | OFF    |       |             |             |              |          |          |            |       |
| C96O2           |         |              |         | AIR     |            |              | OFF      | OFF       | OFF     |          |        | OFF    |       |             |             |              |          |          |            |       |
| C97O2           |         |              |         | AIR     |            |              | OFF      | OFF       | OFF     |          |        | OFF    |       |             |             |              |          |          |            |       |
| C98O2           |         |              |         | AIR     |            |              | OFF      | OFF       | OFF     |          |        | OFF    |       |             |             |              |          |          |            |       |
| NOPINDCO        |         |              |         | AIR     |            |              | ON       | ON        | ON      | ON       |        | ON     |       |             |             |              |          |          |            |       |
| C85CO3H         |         |              |         | AIR     |            |              | ON       | ON        | ON      | ON       |        | ON     |       |             |             |              |          |          |            |       |
| NOPINONE        |         |              |         | AIR     |            |              | ON       | ON        | ON      | ON       |        | ON     |       |             |             |              |          |          |            |       |
| NOPINOO         |         |              |         | AIR     |            |              | ON       | ON        | ON      | ON       |        | ON     |       |             |             |              |          |          |            |       |
| NORPINAL        |         |              |         | AIR     |            |              | ON       | ON        | ON      | ON       |        | ON     |       |             |             |              |          |          |            |       |
| NORPINENOL      |         |              |         | AIR     |            |              | ON       | ON        | ON      | ON       |        | ON     |       |             |             |              |          |          |            |       |
| C89CO2H         |         |              |         | AIR     |            |              | ON       | ON        | ON      | ON       |        | ON     |       |             |             |              |          |          |            |       |
| NOPINDOOH       |         |              |         | AIR     |            |              | ON       | ON        | ON      | ON       |        | ON     |       |             |             |              |          |          |            |       |
| C89CO3H         |         |              |         | AIR     |            |              | ON       | ON        | ON      | ON       |        | ON     |       |             |             |              |          |          |            |       |
| PINIC           |         |              |         | AIR     |            |              | ON       | ON        | ON      | ON       |        | ON     |       |             |             |              |          |          |            |       |
| C811CO3H        |         |              |         | AIR     |            |              | ON       | ON        | ON      | ON       |        | ON     |       |             |             |              |          |          |            |       |
| C96OOH          |         |              |         | AIR     |            |              | ON       | ON        | ON      | ON       |        | ON     |       |             |             |              |          |          |            |       |
| C97OOH          |         |              |         | AIR     |            |              | ON       | ON        | ON      | ON       |        | ON     |       |             |             |              |          |          |            |       |
| C98OOH          |         |              |         | AIR     |            |              | ON       | ON        | ON      | ON       |        | ON     |       |             |             |              |          |          |            |       |
| C89PAN          |         |              |         | AIR     |            |              | ON       | ON        | ON      | ON       |        | ON     |       |             |             |              |          |          |            |       |
| C9PAN2          |         |              |         | AIR     |            |              | ON       | ON        | ON      | ON       |        | ON     |       |             |             |              |          |          |            |       |
| C811PAN         |         |              |         | AIR     |            |              | ON       | ON        | ON      | ON       |        | ON     |       |             |             |              |          |          |            |       |
| C96NO3          |         |              |         | AIR     |            |              | ON       | ON        | ON      | ON       |        | ON     |       |             |             |              |          |          |            |       |
| LTMB            |         |              |         | AIR     |            |              | ON       | ON        | ON      | ON       |        | ON     |       |             |             |              |          |          |            |       |
|-----------------+---------+--------------+---------+---------+------------+--------------+----------+-----------+---------+----------+--------+--------+-------+-------------+-------------+--------------+----------+----------+------------+-------|
| APINENE         |         |              |         | AIR     |            |              | ON       | ON        | ON      | ON       |        | ON     |       |             |             |              |          |          |            |       |
| BPINENE         |         |              |         | AIR     |            |              | ON       | ON        | ON      | ON       |        | ON     |       |             |             |              |          |          |            |       |
| PINALO2         |         |              |         | AIR     |            |              | OFF      | OFF       | OFF     |          |        | OFF    |       |             |             |              |          |          |            |       |
| C109O2          |         |              |         | AIR     |            |              | OFF      | OFF       | OFF     |          |        | OFF    |       |             |             |              |          |          |            |       |
| C96CO3          |         |              |         | AIR     |            |              | OFF      | OFF       | OFF     |          |        | OFF    |       |             |             |              |          |          |            |       |
| C106O2          |         |              |         | AIR     |            |              | OFF      | OFF       | OFF     |          |        | OFF    |       |             |             |              |          |          |            |       |
| APINAOO         |         |              |         | AIR     |            |              | OFF      | OFF       | OFF     |          |        | OFF    |       |             |             |              |          |          |            |       |
| APINBOO         |         |              |         | AIR     |            |              | OFF      | OFF       | OFF     |          |        | OFF    |       |             |             |              |          |          |            |       |
| BPINAO2         |         |              |         | AIR     |            |              | OFF      | OFF       | OFF     |          |        | OFF    |       |             |             |              |          |          |            |       |
| RO6R1O2         |         |              |         | AIR     |            |              | OFF      | OFF       | OFF     |          |        | OFF    |       |             |             |              |          |          |            |       |
| ROO6R1O2        |         |              |         | AIR     |            |              | OFF      | OFF       | OFF     |          |        | OFF    |       |             |             |              |          |          |            |       |
| RO6R3O2         |         |              |         | AIR     |            |              | OFF      | OFF       | OFF     |          |        | OFF    |       |             |             |              |          |          |            |       |
| OHMENTHEN6ONEO2 |         |              |         | AIR     |            |              | OFF      | OFF       | OFF     |          |        | OFF    |       |             |             |              |          |          |            |       |
| LAPINABO2       |         |              |         | AIR     |            |              | OFF      | OFF       | OFF     |          |        | OFF    |       |             |             |              |          |          |            |       |
| LNAPINABO2      |         |              |         | AIR     |            |              | OFF      | OFF       | OFF     |          |        | OFF    |       |             |             |              |          |          |            |       |
| LNBPINABO2      |         |              |         | AIR     |            |              | OFF      | OFF       | OFF     |          |        | OFF    |       |             |             |              |          |          |            |       |
| C109CO          |         |              |         | AIR     |            |              | ON       | ON        | ON      | ON       |        | ON     |       |             |             |              |          |          |            |       |
| PINALOOH        |         |              |         | AIR     |            |              | ON       | ON        | ON      | ON       |        | ON     |       |             |             |              |          |          |            |       |
| PINAL           |         |              |         | AIR     |            |              | ON       | ON        | ON      | ON       |        | ON     |       |             |             |              |          |          |            |       |
| PINENOL         |         |              |         | AIR     |            |              | ON       | ON        | ON      | ON       |        | ON     |       |             |             |              |          |          |            |       |
| MENTHEN6ONE     |         |              |         | AIR     |            |              | ON       | ON        | ON      | ON       |        | ON     |       |             |             |              |          |          |            |       |
| PINONIC         |         |              |         | AIR     |            |              | ON       | ON        | ON      | ON       |        | ON     |       |             |             |              |          |          |            |       |
| C109OOH         |         |              |         | AIR     |            |              | ON       | ON        | ON      | ON       |        | ON     |       |             |             |              |          |          |            |       |
| PERPINONIC      |         |              |         | AIR     |            |              | ON       | ON        | ON      | ON       |        | ON     |       |             |             |              |          |          |            |       |
| C106OOH         |         |              |         | AIR     |            |              | ON       | ON        | ON      | ON       |        | ON     |       |             |             |              |          |          |            |       |
| OH2MENTHEN6ONE  |         |              |         | AIR     |            |              | ON       | ON        | ON      | ON       |        | ON     |       |             |             |              |          |          |            |       |
| BPINAOOH        |         |              |         | AIR     |            |              | ON       | ON        | ON      | ON       |        | ON     |       |             |             |              |          |          |            |       |
| RO6R1OOH        |         |              |         | AIR     |            |              | ON       | ON        | ON      | ON       |        | ON     |       |             |             |              |          |          |            |       |
| ROO6R1OOH       |         |              |         | AIR     |            |              | ON       | ON        | ON      | ON       |        | ON     |       |             |             |              |          |          |            |       |
| PINALNO3        |         |              |         | AIR     |            |              | ON       | ON        | ON      | ON       |        | ON     |       |             |             |              |          |          |            |       |
| C10PAN2         |         |              |         | AIR     |            |              | ON       | ON        | ON      | ON       |        | ON     |       |             |             |              |          |          |            |       |
| C106NO3         |         |              |         | AIR     |            |              | ON       | ON        | ON      | ON       |        | ON     |       |             |             |              |          |          |            |       |
| BPINANO3        |         |              |         | AIR     |            |              | ON       | ON        | ON      | ON       |        | ON     |       |             |             |              |          |          |            |       |
| RO6R1NO3        |         |              |         | AIR     |            |              | ON       | ON        | ON      | ON       |        | ON     |       |             |             |              |          |          |            |       |
| ROO6R1NO3       |         |              |         | AIR     |            |              | ON       | ON        | ON      | ON       |        | ON     |       |             |             |              |          |          |            |       |
| LAPINABOOH      |         |              |         | AIR     |            |              | ON       | ON        | ON      | ON       |        | ON     |       |             |             |              |          |          |            |       |
| LAPINABNO3      |         |              |         | AIR     |            |              | ON       | ON        | ON      | ON       |        | ON     |       |             |             |              |          |          |            |       |
| LNAPINABOOH     |         |              |         | AIR     |            |              | ON       | ON        | ON      | ON       |        | ON     |       |             |             |              |          |          |            |       |
| LNBPINABOOH     |         |              |         | AIR     |            |              | ON       | ON        | ON      | ON       |        | ON     |       |             |             |              |          |          |            |       |
| CARENE          |         |              |         | AIR     |            |              | ON       | ON        | ON      | ON       |        | ON     |       |             |             |              |          |          |            |       |
| SABINENE        |         |              |         | AIR     |            |              | ON       | ON        | ON      | ON       |        | ON     |       |             |             |              |          |          |            |       |
| CAMPHENE        |         |              |         | AIR     |            |              | ON       | ON        | ON      | ON       |        | ON     |       |             |             |              |          |          |            |       |
|-----------------+---------+--------------+---------+---------+------------+--------------+----------+-----------+---------+----------+--------+--------+-------+-------------+-------------+--------------+----------+----------+------------+-------|
| LHAROM          |         |              |         | AIR     |            |              | ON       | ON        | ON      | ON       |        | ON     |       |             |             |              |          |          |            |       |
|-----------------+---------+--------------+---------+---------+------------+--------------+----------+-----------+---------+----------+--------+--------+-------+-------------+-------------+--------------+----------+----------+------------+-------|
| CHF3            |         |              |         | AIR     |            |              | ON       | ON        | ON      |          |        | OFF    |       |             |             |              |          |          |            |       |
| CHF2CF3         |         |              |         | AIR     |            |              | ON       | ON        | ON      |          |        | OFF    |       |             |             |              |          |          |            |       |
| CH3CF3          |         |              |         | AIR     |            |              | ON       | ON        | ON      |          |        | OFF    |       |             |             |              |          |          |            |       |
| CH2F2           |         |              |         | AIR     |            |              | ON       | ON        | ON      |          |        | OFF    |       |             |             |              |          |          |            |       |
| CH3CHF2         |         |              |         | AIR     |            |              | ON       | ON        | ON      |          |        | OFF    |       |             |             |              |          |          |            |       |
| CHF2CF3         |         |              |         | AIR     |            |              | ON       | ON        | ON      |          |        | OFF    |       |             |             |              |          |          |            |       |
|-----------------+---------+--------------+---------+---------+------------+--------------+----------+-----------+---------+----------+--------+--------+-------+-------------+-------------+--------------+----------+----------+------------+-------|
| Cl              |         |              |         | AIR     |            |              | OFF      | OFF       | OFF     |          |        | OFF    |       |             |             |              |          |          |            |       |
| Cl2             |         |              |         | AIR     |            |              | ON       | ON        | ON      | ON       |        | ON     |       |             |             |              |          |          |            |       |
| ClO             |         |              |         | AIR     |            |              | OFF      | OFF       | OFF     |          |        | ON     |       |             |             |              |          |          |            |       |
| HCl             |         |              |         | AIR     |            |              | ON       | ON        | ON      | ON       |        | ON     |       |             |             |              |          |          |            |       |
| HOCl            |         |              |         | AIR     |            |              | ON       | ON        | ON      | ON       |        | ON     |       |             |             |              |          |          |            |       |
| Cl2O2           |         |              |         | AIR     |            |              | ON       | ON        | ON      |          |        | OFF    |       |             |             |              |          |          |            |       |
| OClO            |         |              |         | AIR     |            |              | ON       | ON        | ON      |          |        | OFF    |       |             |             |              |          |          |            |       |
| ClNO2           |         |              |         | AIR     |            |              | ON       | ON        | ON      |          |        | OFF    |       |             |             |              |          |          |            |       |
| ClNO3           |         |              |         | AIR     |            |              | ON       | ON        | ON      | ON       |        | OFF    |       |             |             |              |          |          |            |       |
| CCl4            |         |              |         | AIR     |            |              | ON       | ON        | ON      |          |        | OFF    |       |             |             |              |          |          |            |       |
| CH3Cl           |         |              |         | AIR     |            |              | ON       | ON        | ON      | ON       |        | OFF    |       |             |             |              |          |          |            |       |
| CH3CCl3         |         |              |         | AIR     |            |              | ON       | ON        | ON      |          |        | OFF    |       |             |             |              |          |          |            |       |
| CF2Cl2          |         |              |         | AIR     |            |              | ON       | ON        | ON      |          |        | OFF    |       |             |             |              |          |          |            |       |
| CFCl3           |         |              |         | AIR     |            |              | ON       | ON        | ON      |          |        | OFF    |       |             |             |              |          |          |            |       |
| CHF2Cl          |         |              |         | AIR     |            |              | ON       | ON        | ON      |          |        | OFF    |       |             |             |              |          |          |            |       |
| CH2FCF3         |         |              |         | AIR     |            |              | ON       | ON        | ON      |          |        | OFF    |       |             |             |              |          |          |            |       |
| CH2Cl2          |         |              |         | AIR     |            |              | ON       | ON        | ON      |          |        | OFF    |       |             |             |              |          |          |            |       |
| CF2ClCFCl2      |         |              |         | AIR     |            |              | ON       | ON        | ON      |          |        | OFF    |       |             |             |              |          |          |            |       |
| CH3CFCl2        |         |              |         | AIR     |            |              | ON       | ON        | ON      |          |        | OFF    |       |             |             |              |          |          |            |       |
| CF2ClCF2Cl      |         |              |         | AIR     |            |              | ON       | ON        | ON      |          |        | OFF    |       |             |             |              |          |          |            |       |
| CHCl3           |         |              |         | AIR     |            |              | ON       | ON        | ON      |          |        | OFF    |       |             |             |              |          |          |            |       |
| CF3CF2Cl        |         |              |         | AIR     |            |              | ON       | ON        | ON      |          |        | OFF    |       |             |             |              |          |          |            |       |
| LCHLORINE       |         |              | Cl      | AIR     |            |              | OFF      | OFF       | OFF     |          |        |        |       |             |             |              |          |          |            |       |
|-----------------+---------+--------------+---------+---------+------------+--------------+----------+-----------+---------+----------+--------+--------+-------+-------------+-------------+--------------+----------+----------+------------+-------|
| Br              |         |              |         | AIR     |            |              | OFF      | OFF       | OFF     |          |        | OFF    |       |             |             |              |          |          |            |       |
| Br2             |         |              |         | AIR     |            |              | ON       | ON        | ON      | ON       |        | ON     |       |             |             |              |          |          |            |       |
| BrO             |         |              |         | AIR     |            |              | ON       | ON        | ON      |          |        | ON     |       |             |             |              |          |          |            |       |
| HBr             |         |              |         | AIR     |            |              | ON       | ON        | ON      | ON       |        | ON     |       |             |             |              |          |          |            |       |
| HOBr            |         |              |         | AIR     |            |              | ON       | ON        | ON      | ON       |        | ON     |       |             |             |              |          |          |            |       |
| BrNO2           |         |              |         | AIR     |            |              | ON       | ON        | ON      |          |        | OFF    |       |             |             |              |          |          |            |       |
| BrNO3           |         |              |         | AIR     |            |              | ON       | ON        | ON      | ON       |        | ON     |       |             |             |              |          |          |            |       |
| BrCl            |         |              |         | AIR     |            |              | ON       | ON        | ON      | ON       |        | ON     |       |             |             |              |          |          |            |       |
| CH2ClBr         |         |              |         | AIR     |            |              | ON       | ON        | ON      | ON       |        | OFF    |       |             |             |              |          |          |            |       |
| CHCl2Br         |         |              |         | AIR     |            |              | ON       | ON        | ON      | ON       |        | OFF    |       |             |             |              |          |          |            |       |
| CHClBr2         |         |              |         | AIR     |            |              | ON       | ON        | ON      | ON       |        | OFF    |       |             |             |              |          |          |            |       |
| CH2Br2          |         |              |         | AIR     |            |              | ON       | ON        | ON      | ON       |        | OFF    |       |             |             |              |          |          |            |       |
| CH3Br           |         |              |         | AIR     |            |              | ON       | ON        | ON      | ON       |        | OFF    |       |             |             |              |          |          |            |       |
| CHBr3           |         |              |         | AIR     |            |              | ON       | ON        | ON      | ON       |        | OFF    |       |             |             |              |          |          |            |       |
| CF3Br           |         |              |         | AIR     |            |              | ON       | ON        | ON      |          |        | OFF    |       |             |             |              |          |          |            |       |
| CF2ClBr         |         |              |         | AIR     |            |              | ON       | ON        | ON      |          |        | OFF    |       |             |             |              |          |          |            |       |
|-----------------+---------+--------------+---------+---------+------------+--------------+----------+-----------+---------+----------+--------+--------+-------+-------------+-------------+--------------+----------+----------+------------+-------|
| Brorg           |         |              |         | AIR     |            |              | ON       | ON        | ON      | ON       |        | ON     |       |             |             |              |          |          |            |       |
| Brsalt          |         |              |         | AIR     |            |              | ON       | ON        | ON      | ON       |        | ON     |       |             |             |              |          |          |            |       |
|-----------------+---------+--------------+---------+---------+------------+--------------+----------+-----------+---------+----------+--------+--------+-------+-------------+-------------+--------------+----------+----------+------------+-------|
| I               |         |              |         | AIR     |            |              | OFF      | OFF       | OFF     |          |        | OFF    |       |             |             |              |          |          |            |       |
| I2              |         |              |         | AIR     |            |              | ON       | ON        | ON      | ON       |        | ON     |       |             |             |              |          |          |            |       |
| IO              |         |              |         | AIR     |            |              | OFF      | OFF       | OFF     |          |        | ON     |       |             |             |              |          |          |            |       |
| OIO             |         |              |         | AIR     |            |              | ON       | ON        | ON      |          |        | OFF    |       |             |             |              |          |          |            |       |
| I2O2            |         |              |         | AIR     |            |              | ON       | ON        | ON      |          |        | OFF    |       |             |             |              |          |          |            |       |
| HI              |         |              |         | AIR     |            |              | ON       | ON        | ON      | ON       |        | ON     |       |             |             |              |          |          |            |       |
| HOI             |         |              |         | AIR     |            |              | ON       | ON        | ON      | ON       |        | ON     |       |             |             |              |          |          |            |       |
| HIO3            |         |              |         | AIR     |            |              | ON       | ON        | ON      | ON       |        | OFF    |       |             |             |              |          |          |            |       |
| INO2            |         |              |         | AIR     |            |              | ON       | ON        | ON      | ON       |        | OFF    |       |             |             |              |          |          |            |       |
| INO3            |         |              |         | AIR     |            |              | ON       | ON        | ON      | ON       |        | OFF    |       |             |             |              |          |          |            |       |
| CH3I            |         |              |         | AIR     |            |              | ON       | ON        | ON      |          |        | OFF    |       |             |             |              |          |          |            |       |
| CH2I2           |         |              |         | AIR     |            |              | ON       | ON        | ON      |          |        | OFF    |       |             |             |              |          |          |            |       |
| C3H7I           |         |              |         | AIR     |            |              | ON       | ON        | ON      |          |        | OFF    |       |             |             |              |          |          |            |       |
| ICl             |         |              |         | AIR     |            |              | ON       | ON        | ON      | ON       |        | OFF    |       |             |             |              |          |          |            |       |
| CH2ClI          |         |              |         | AIR     |            |              | ON       | ON        | ON      | ON       |        | OFF    |       |             |             |              |          |          |            |       |
| IBr             |         |              |         | AIR     |            |              | ON       | ON        | ON      |          |        | OFF    |       |             |             |              |          |          |            |       |
|-----------------+---------+--------------+---------+---------+------------+--------------+----------+-----------+---------+----------+--------+--------+-------+-------------+-------------+--------------+----------+----------+------------+-------|
| S               |         |              |         | AIR     |            |              | OFF      | OFF       | OFF     |          |        | OFF    |       |             |             |              |          |          |            |       |
| SO              |         |              |         | AIR     |            |              | OFF      | OFF       | OFF     |          |        | OFF    |       |             |             |              |          |          |            |       |
| SO2             |         |              |         | AIR     |            |              | ON       | ON        | ON      | ON       |        | ON     |       |             |             |              |          |          |            |       |
| SO3             |         |              |         | AIR     |            |              | OFF      | OFF       | OFF     |          |        | OFF    |       |             |             |              |          |          |            |       |
| SH              |         |              |         | AIR     |            |              | OFF      | OFF       | OFF     |          |        | OFF    |       |             |             |              |          |          |            |       |
| H2SO4           |         |              |         | AIR     |            |              | ON       | ON        | ON      | ON       |        | ON     |       |             |             |              |          |          |            |       |
| CH3SO3H         |         |              |         | AIR     |            |              | ON       | ON        | ON      | ON       |        | ON     |       |             |             |              |          |          |            |       |
| DMS             |         |              |         | AIR     |            |              | ON       | ON        | ON      |          |        | OFF    |       |             |             |              |          |          |            |       |
| DMSO            |         |              |         | AIR     |            |              | OFF      | OFF       | OFF     | ON       |        | ON     |       |             |             |              |          |          |            |       |
| CH3SO2          |         |              |         | AIR     |            |              | OFF      | OFF       | OFF     |          |        | OFF    |       |             |             |              |          |          |            |       |
| CH3SO3          |         |              |         | AIR     |            |              | OFF      | OFF       | OFF     |          |        | OFF    |       |             |             |              |          |          |            |       |
| OCS             |         |              |         | AIR     |            |              | ON       | ON        | ON      |          |        | ON     |       |             |             |              |          |          |            |       |
| SF6             |         |              |         | AIR     |            |              | ON       | ON        | ON      |          |        | OFF    |       |             |             |              |          |          |            |       |
|-----------------+---------+--------------+---------+---------+------------+--------------+----------+-----------+---------+----------+--------+--------+-------+-------------+-------------+--------------+----------+----------+------------+-------|
| Hg              |         |              |         | AIR     |            |              | ON       | ON        | ON      | OFF      |        | OFF    |       |             |             |              |          |          |            |       |
| HgO             |         |              |         | AIR     |            |              | ON       | ON        | ON      | ON       |        | ON     |       |             |             |              |          |          |            |       |
| HgCl            |         |              |         | AIR     |            |              | ON       | ON        | ON      | ON       |        | ON     |       |             |             |              |          |          |            |       |
| HgCl2           |         |              |         | AIR     |            |              | ON       | ON        | ON      | ON       |        | ON     |       |             |             |              |          |          |            |       |
| HgBr            |         |              |         | AIR     |            |              | ON       | ON        | ON      | ON       |        | ON     |       |             |             |              |          |          |            |       |
| HgBr2           |         |              |         | AIR     |            |              | ON       | ON        | ON      | ON       |        | ON     |       |             |             |              |          |          |            |       |
| ClHgBr          |         |              |         | AIR     |            |              | ON       | ON        | ON      | ON       |        | ON     |       |             |             |              |          |          |            |       |
| BrHgOBr         |         |              |         | AIR     |            |              | ON       | ON        | ON      | ON       |        | ON     |       |             |             |              |          |          |            |       |
| ClHgOBr         |         |              |         | AIR     |            |              | ON       | ON        | ON      | ON       |        | ON     |       |             |             |              |          |          |            |       |
|-----------------+---------+--------------+---------+---------+------------+--------------+----------+-----------+---------+----------+--------+--------+-------+-------------+-------------+--------------+----------+----------+------------+-------|
| NO3m            | cs      |              | NO3     | AEROSOL |            |              | ON       | ON        | ON      | ON       | ON     | ON     |       |             |             |              | MODAL    | c_pa_asm | i_pa_amode |       |
| Hp              | cs      |              | H       | AEROSOL |            |              | ON       | ON        | ON      | ON       | ON     | ON     |       |             |             |              | MODAL    | c_pa_asm | i_pa_amode |       |
| RGM             | cs      |              | Hg      | AEROSOL |            |              | ON       | ON        | ON      | ON       | ON     | ON     |       |             |             |              | MODAL    | c_pa_asm | i_pa_amode |       |
|-----------------+---------+--------------+---------+---------+------------+--------------+----------+-----------+---------+----------+--------+--------+-------+-------------+-------------+--------------+----------+----------+------------+-------|
| NACA            |         |              |         | AIR     |            |              | ON       | ON        | ON      |          |        | OFF    |       |             |             |              |          |          |            |       |
| LHOC3H6O2       |         |              |         | AIR     |            |              | OFF      | OFF       | OFF     |          |        | OFF    |       |             |             |              |          |          |            |       |
| LHOC3H6OOH      |         |              |         | AIR     |            |              | ON       | ON        | ON      |          |        | OFF    |       |             |             |              |          |          |            |       |
| MVKO2           |         |              |         | AIR     |            |              | OFF      | OFF       | OFF     |          |        | OFF    |       |             |             |              |          |          |            |       |
| MVKOOH          |         |              |         | AIR     |            |              | OFF      | OFF       | OFF     |          |        | OFF    |       |             |             |              |          |          |            |       |
| ISO2            |         |              |         | AIR     |            |              | OFF      | OFF       | OFF     |          |        | OFF    |       |             |             |              |          |          |            |       |
| ISOOH           |         |              |         | AIR     |            |              | OFF      | OFF       | OFF     | ON       |        | OFF    |       |             |             |              |          |          |            |       |
| ISON            |         |              |         | AIR     |            |              | ON       | ON        | ON      | ON       |        | OFF    |       |             |             |              |          |          |            |       |
|-----------------+---------+--------------+---------+---------+------------+--------------+----------+-----------+---------+----------+--------+--------+-------+-------------+-------------+--------------+----------+----------+------------+-------|
| Op              |         |              |         | AIR     |            |              | OFF      | OFF       | OFF     |          |        | OFF    |       |             |             |              |          |          |            |       |
| O2p             |         |              |         | AIR     |            |              | OFF      | OFF       | OFF     |          |        | OFF    |       |             |             |              |          |          |            |       |
| Np              |         |              |         | AIR     |            |              | OFF      | OFF       | OFF     |          |        | OFF    |       |             |             |              |          |          |            |       |
| N2p             |         |              |         | AIR     |            |              | OFF      | OFF       | OFF     |          |        | OFF    |       |             |             |              |          |          |            |       |
| NOp             |         |              |         | AIR     |            |              | OFF      | OFF       | OFF     |          |        | OFF    |       |             |             |              |          |          |            |       |
| Hp              |         |              |         | AIR     |            |              | OFF      | OFF       | OFF     |          |        | OFF    |       |             |             |              |          |          |            |       |
| em              |         |              |         | AIR     |            |              | OFF      | OFF       | OFF     |          |        | OFF    |       |             |             |              |          |          |            |       |
| kJmol           |         |              |         | AIR     |            |              | OFF      | OFF       | OFF     |          |        | OFF    |       |             |             |              |          |          |            |       |
|-----------------+---------+--------------+---------+---------+------------+--------------+----------+-----------+---------+----------+--------+--------+-------+-------------+-------------+--------------+----------+----------+------------+-------|
| O4Sp            |         |              | O       | AIR     |            |              | OFF      | OFF       | OFF     |          |        | OFF    |       |             |             |              |          |          |            |       |
| O2Dp            |         |              | O       | AIR     |            |              | OFF      | OFF       | OFF     |          |        | OFF    |       |             |             |              |          |          |            |       |
| O2Pp            |         |              | O       | AIR     |            |              | OFF      | OFF       | OFF     |          |        | OFF    |       |             |             |              |          |          |            |       |
|-----------------+---------+--------------+---------+---------+------------+--------------+----------+-----------+---------+----------+--------+--------+-------+-------------+-------------+--------------+----------+----------+------------+-------|
| RH2O            |         |              |         | AIR     |            |              | OFF      | OFF       | OFF     | OFF      |        | OFF    |       |             |             |              |          |          |            |       |
| RNOy            |         |              |         | AIR     |            |              | OFF      | OFF       | OFF     | OFF      |        | OFF    |       |             |             |              |          |          |            |       |
| RCly            |         |              |         | AIR     |            |              | OFF      | OFF       | OFF     | OFF      |        | OFF    |       |             |             |              |          |          |            |       |
| RBr             |         |              |         | AIR     |            |              | OFF      | OFF       | OFF     | OFF      |        | OFF    |       |             |             |              |          |          |            |       |
|-----------------+---------+--------------+---------+---------+------------+--------------+----------+-----------+---------+----------+--------+--------+-------+-------------+-------------+--------------+----------+----------+------------+-------|
| PO3             |         |              |         | AIR     |            |              | OFF      | OFF       | OFF     | OFF      | OFF    | OFF    | OFF   |             |             |              |          |          |            |       |
| LO3             |         |              |         | AIR     |            |              | OFF      | OFF       | OFF     | OFF      | OFF    | OFF    | OFF   |             |             |              |          |          |            |       |
| PCO             |         |              |         | AIR     |            |              | OFF      | OFF       | OFF     | OFF      | OFF    | OFF    | OFF   |             |             |              |          |          |            |       |
| LCO             |         |              |         | AIR     |            |              | OFF      | OFF       | OFF     | OFF      | OFF    | OFF    | OFF   |             |             |              |          |          |            |       |
| PCH4            |         |              |         | AIR     |            |              | OFF      | OFF       | OFF     | OFF      | OFF    | OFF    | OFF   |             |             |              |          |          |            |       |
| LCH4            |         |              |         | AIR     |            |              | OFF      | OFF       | OFF     | OFF      | OFF    | OFF    | OFF   |             |             |              |          |          |            |       |
| POH             |         |              |         | AIR     |            |              | OFF      | OFF       | OFF     | OFF      | OFF    | OFF    | OFF   |             |             |              |          |          |            |       |
| LOH             |         |              |         | AIR     |            |              | OFF      | OFF       | OFF     | OFF      | OFF    | OFF    | OFF   |             |             |              |          |          |            |       |
| LHO2            |         |              |         | AIR     |            |              | OFF      | OFF       | OFF     | OFF      | OFF    | OFF    | OFF   |             |             |              |          |          |            |       |
| PHO2            |         |              |         | AIR     |            |              | OFF      | OFF       | OFF     | OFF      | OFF    | OFF    | OFF   |             |             |              |          |          |            |       |
| LNO             |         |              |         | AIR     |            |              | OFF      | OFF       | OFF     | OFF      | OFF    | OFF    | OFF   |             |             |              |          |          |            |       |
| PNO             |         |              |         | AIR     |            |              | OFF      | OFF       | OFF     | OFF      | OFF    | OFF    | OFF   |             |             |              |          |          |            |       |
| LNO2            |         |              |         | AIR     |            |              | OFF      | OFF       | OFF     | OFF      | OFF    | OFF    | OFF   |             |             |              |          |          |            |       |
| PNO2            |         |              |         | AIR     |            |              | OFF      | OFF       | OFF     | OFF      | OFF    | OFF    | OFF   |             |             |              |          |          |            |       |
| LNOy            |         |              |         | AIR     |            |              | OFF      | OFF       | OFF     | OFF      | OFF    | OFF    | OFF   |             |             |              |          |          |            |       |
| PNOy            |         |              |         | AIR     |            |              | OFF      | OFF       | OFF     | OFF      | OFF    | OFF    | OFF   |             |             |              |          |          |            |       |
| LHNO3           |         |              |         | AIR     |            |              | OFF      | OFF       | OFF     | OFF      | OFF    | OFF    | OFF   |             |             |              |          |          |            |       |
| PHNO3           |         |              |         | AIR     |            |              | OFF      | OFF       | OFF     | OFF      | OFF    | OFF    | OFF   |             |             |              |          |          |            |       |
|-----------------+---------+--------------+---------+---------+------------+--------------+----------+-----------+---------+----------+--------+--------+-------+-------------+-------------+--------------+----------+----------+------------+-------|
| CFCl3           | c       |              |         | AIR     |            |              | ON       | ON        | ON      |          |        | OFF    |       |             |             |              |          |          |            |       |
| CF2Cl2          | c       |              |         | AIR     |            |              | ON       | ON        | ON      |          |        | OFF    |       |             |             |              |          |          |            |       |
| N2O             | c       |              |         | AIR     |            |              | ON       | ON        | ON      |          |        | OFF    |       |             |             |              |          |          |            |       |
| CH3CCl3         | c       |              |         | AIR     |            |              | ON       | ON        | ON      |          |        | OFF    |       |             |             |              |          |          |            |       |
| CF2ClBr         | c       |              |         | AIR     |            |              | ON       | ON        | ON      |          |        | OFF    |       |             |             |              |          |          |            |       |
| CF3Br           | c       |              |         | AIR     |            |              | ON       | ON        | ON      |          |        | OFF    |       |             |             |              |          |          |            |       |
|-----------------+---------+--------------+---------+---------+------------+--------------+----------+-----------+---------+----------+--------+--------+-------+-------------+-------------+--------------+----------+----------+------------+-------|
| LTERP           |         |              |         | AIR     |            |              | ON       | ON        | ON      | ON       |        | ON     |       |             |             |              |          |          |            |       |
| LALK4           |         |              |         | AIR     |            |              | ON       | ON        | ON      | ON       |        | ON     |       |             |             |              |          |          |            |       |
| LALK5           |         |              |         | AIR     |            |              | ON       | ON        | ON      | ON       |        | ON     |       |             |             |              |          |          |            |       |
| LARO1           |         |              |         | AIR     |            |              | ON       | ON        | ON      | ON       |        | ON     |       |             |             |              |          |          |            |       |
| LARO2           |         |              |         | AIR     |            |              | ON       | ON        | ON      | ON       |        | ON     |       |             |             |              |          |          |            |       |
| LOLE1           |         |              |         | AIR     |            |              | ON       | ON        | ON      | ON       |        | ON     |       |             |             |              |          |          |            |       |
| LOLE2           |         |              |         | AIR     |            |              | ON       | ON        | ON      | ON       |        | ON     |       |             |             |              |          |          |            |       |
| LfPOG02         |         |              |         | AIR     |            |              | ON       | ON        | ON      | ON       |        | ON     |       |             |             |              |          |          |            |       |
| LfPOG03         |         |              |         | AIR     |            |              | ON       | ON        | ON      | ON       |        | ON     |       |             |             |              |          |          |            |       |
| LfPOG04         |         |              |         | AIR     |            |              | ON       | ON        | ON      | ON       |        | ON     |       |             |             |              |          |          |            |       |
| LfPOG05         |         |              |         | AIR     |            |              | ON       | ON        | ON      | ON       |        | ON     |       |             |             |              |          |          |            |       |
| LbbPOG02        |         |              |         | AIR     |            |              | ON       | ON        | ON      | ON       |        | ON     |       |             |             |              |          |          |            |       |
| LbbPOG03        |         |              |         | AIR     |            |              | ON       | ON        | ON      | ON       |        | ON     |       |             |             |              |          |          |            |       |
| LbbPOG04        |         |              |         | AIR     |            |              | ON       | ON        | ON      | ON       |        | ON     |       |             |             |              |          |          |            |       |
| LfSOGsv01       |         |              |         | AIR     |            |              | ON       | ON        | ON      | ON       |        | ON     |       |             |             |              |          |          |            |       |
| LfSOGsv02       |         |              |         | AIR     |            |              | ON       | ON        | ON      | ON       |        | ON     |       |             |             |              |          |          |            |       |
| LbbSOGsv01      |         |              |         | AIR     |            |              | ON       | ON        | ON      | ON       |        | ON     |       |             |             |              |          |          |            |       |
| LbbSOGsv02      |         |              |         | AIR     |            |              | ON       | ON        | ON      | ON       |        | ON     |       |             |             |              |          |          |            |       |
| LfSOGiv01       |         |              |         | AIR     |            |              | ON       | ON        | ON      | ON       |        | ON     |       |             |             |              |          |          |            |       |
| LfSOGiv02       |         |              |         | AIR     |            |              | ON       | ON        | ON      | ON       |        | ON     |       |             |             |              |          |          |            |       |
| LfSOGiv03       |         |              |         | AIR     |            |              | ON       | ON        | ON      | ON       |        | ON     |       |             |             |              |          |          |            |       |
| LfSOGiv04       |         |              |         | AIR     |            |              | ON       | ON        | ON      | ON       |        | ON     |       |             |             |              |          |          |            |       |
| LbbSOGiv01      |         |              |         | AIR     |            |              | ON       | ON        | ON      | ON       |        | ON     |       |             |             |              |          |          |            |       |
| LbbSOGiv02      |         |              |         | AIR     |            |              | ON       | ON        | ON      | ON       |        | ON     |       |             |             |              |          |          |            |       |
| LbbSOGiv03      |         |              |         | AIR     |            |              | ON       | ON        | ON      | ON       |        | ON     |       |             |             |              |          |          |            |       |
| LbSOGv01        |         |              |         | AIR     |            |              | ON       | ON        | ON      | ON       |        | ON     |       |             |             |              |          |          |            |       |
| LbSOGv02        |         |              |         | AIR     |            |              | ON       | ON        | ON      | ON       |        | ON     |       |             |             |              |          |          |            |       |
| LbSOGv03        |         |              |         | AIR     |            |              | ON       | ON        | ON      | ON       |        | ON     |       |             |             |              |          |          |            |       |
| LbSOGv04        |         |              |         | AIR     |            |              | ON       | ON        | ON      | ON       |        | ON     |       |             |             |              |          |          |            |       |
| LbOSOGv01       |         |              |         | AIR     |            |              | ON       | ON        | ON      | ON       |        | ON     |       |             |             |              |          |          |            |       |
| LbOSOGv02       |         |              |         | AIR     |            |              | ON       | ON        | ON      | ON       |        | ON     |       |             |             |              |          |          |            |       |
| LbOSOGv03       |         |              |         | AIR     |            |              | ON       | ON        | ON      | ON       |        | ON     |       |             |             |              |          |          |            |       |
| LaSOGv01        |         |              |         | AIR     |            |              | ON       | ON        | ON      | ON       |        | ON     |       |             |             |              |          |          |            |       |
| LaSOGv02        |         |              |         | AIR     |            |              | ON       | ON        | ON      | ON       |        | ON     |       |             |             |              |          |          |            |       |
| LaSOGv03        |         |              |         | AIR     |            |              | ON       | ON        | ON      | ON       |        | ON     |       |             |             |              |          |          |            |       |
| LaSOGv04        |         |              |         | AIR     |            |              | ON       | ON        | ON      | ON       |        | ON     |       |             |             |              |          |          |            |       |
| LaOSOGv01       |         |              |         | AIR     |            |              | ON       | ON        | ON      | ON       |        | ON     |       |             |             |              |          |          |            |       |
| LaOSOGv02       |         |              |         | AIR     |            |              | ON       | ON        | ON      | ON       |        | ON     |       |             |             |              |          |          |            |       |
| LaOSOGv03       |         |              |         | AIR     |            |              | ON       | ON        | ON      | ON       |        | ON     |       |             |             |              |          |          |            |       |
|-----------------+---------+--------------+---------+---------+------------+--------------+----------+-----------+---------+----------+--------+--------+-------+-------------+-------------+--------------+----------+----------+------------+-------|
| OHv0            |         |              | OH      | AIR     |            |              | OFF      | OFF       | OFF     |          |        | OFF    |       |             |             |              |          |          |            |       |
| OHv1            |         |              | OH      | AIR     |            |              | OFF      | OFF       | OFF     |          |        | OFF    |       |             |             |              |          |          |            |       |
| OHv2            |         |              | OH      | AIR     |            |              | OFF      | OFF       | OFF     |          |        | OFF    |       |             |             |              |          |          |            |       |
| OHv3            |         |              | OH      | AIR     |            |              | OFF      | OFF       | OFF     |          |        | OFF    |       |             |             |              |          |          |            |       |
| OHv4            |         |              | OH      | AIR     |            |              | OFF      | OFF       | OFF     |          |        | OFF    |       |             |             |              |          |          |            |       |
| OHv5            |         |              | OH      | AIR     |            |              | OFF      | OFF       | OFF     |          |        | OFF    |       |             |             |              |          |          |            |       |
| OHv6            |         |              | OH      | AIR     |            |              | OFF      | OFF       | OFF     |          |        | OFF    |       |             |             |              |          |          |            |       |
| OHv7            |         |              | OH      | AIR     |            |              | OFF      | OFF       | OFF     |          |        | OFF    |       |             |             |              |          |          |            |       |
| OHv8            |         |              | OH      | AIR     |            |              | OFF      | OFF       | OFF     |          |        | OFF    |       |             |             |              |          |          |            |       |
| OHv9            |         |              | OH      | AIR     |            |              | OFF      | OFF       | OFF     |          |        | OFF    |       |             |             |              |          |          |            |       |
| O21d            |         |              | O2      | AIR     |            |              | ON       | ON        | ON      |          |        | OFF    |       |             |             |              |          |          |            |       |
| O1S             |         |              | O       | AIR     |            |              | OFF      | OFF       | OFF     |          |        | OFF    |       |             |             |              |          |          |            |       |
| O2b1s           |         |              | O2      | AIR     |            |              | OFF      | OFF       | OFF     |          |        | OFF    |       |             |             |              |          |          |            |       |
| O2c1s           |         |              | O2      | AIR     |            |              | OFF      | OFF       | OFF     |          |        | OFF    |       |             |             |              |          |          |            |       |
| O2x             |         |              | O2      | AIR     |            |              | OFF      | OFF       | OFF     |          |        | OFF    |       |             |             |              |          |          |            |       |
| O2A3D           |         |              | O2      | AIR     |            |              | OFF      | OFF       | OFF     |          |        | OFF    |       |             |             |              |          |          |            |       |
| O2A3S           |         |              | O2      | AIR     |            |              | OFF      | OFF       | OFF     |          |        | OFF    |       |             |             |              |          |          |            |       |
| O5P             |         |              | O2      | AIR     |            |              | OFF      | OFF       | OFF     |          |        | OFF    |       |             |             |              |          |          |            |       |
|-----------------+---------+--------------+---------+---------+------------+--------------+----------+-----------+---------+----------+--------+--------+-------+-------------+-------------+--------------+----------+----------+------------+-------|
