# Supplementary material for: Oxidation of low-molecular weight organic compounds in clouddroplets: development of the JAMOC chemical mechanism inCAABA/MECCA (version 4.5.0gmdd)
Source: Copernicus journal article supplement (doi:10.5194/gmd-2020-337), 2020-10-29
Supplement: Supplementary file 20 [file gmd-2020-337-supplement.zip › caaba_4.5.0gmdd/messy_main_rnd_mtw.f90]

module messy_main_rnd_mtw

  ! A C-program for MT19937, with initialization improved 2002/1/26.
  ! Coded by Takuji Nishimura and Makoto Matsumoto.
  ! Code converted to Fortran 95 by Josi Rui Faustino de Sousa
  ! Date: 2002-02-01
  ! Before using, initialize the state by using init_genrand(seed)
  ! or init_by_array(init_key, key_length).
  ! This library is free software.
  ! This library is distributed in the hope that it will be useful,
  ! but WITHOUT ANY WARRANTY; without even the implied warranty of
  ! MERCHANTABILITY or FITNESS FOR A PARTICULAR PURPOSE.
  ! Copyright (C) 1997, 2002 Makoto Matsumoto and Takuji Nishimura.
  ! Any feedback is very welcome.
  ! M. Matsumoto and T. Nishimura,
  ! "Mersenne Twister: A 623-dimensionally equidistributed uniform
  ! pseudorandom number generator",
  ! ACM Trans. on Modeling and Computer Simulation
  ! Vol. 8, No. 1, January pp.3-30 1998
  ! http://www.math.sci.hiroshima-u.ac.jp/~m-mat/MT/emt.html
  ! email: matumoto@math.keio.ac.jp

  implicit none

  intrinsic :: bit_size

  private
  public  :: init_genrand, init_by_array
  public  :: genrand_int32, genrand_int31
  public  :: genrand_real1, genrand_real2, genrand_real3, genrand_res53

  ! size must be increased because temper_b=z'EFC60000' has 10 (decimal) digits
  !!$ integer,  parameter  :: intg = selected_int_kind( 9 )
  integer,  parameter  :: intg = selected_int_kind( 10 )
  integer,  parameter  :: long = selected_int_kind( 18 )
  integer,  parameter  :: flot = selected_real_kind( 6, 37 )
  integer,  parameter  :: dobl = selected_real_kind( 15, 307 )

  integer,  public, parameter :: wi = intg
  integer,  public, parameter :: wl = long
  integer,  public, parameter :: wr = dobl

  ! Period parameters
  integer( kind = wi ), parameter :: n = 624_wi
  integer( kind = wi ), parameter :: m = 397_wi
  integer( kind = wi ), parameter :: hbs = bit_size( n ) / 2_wi
  integer( kind = wi ), parameter :: qbs = hbs / 2_wi
  integer( kind = wi ), parameter :: tbs = 3_wi * qbs

! mz_pj_20060217+
!  integer( kind = wi )  :: mt(n)          ! the array for the state vector
!  logical( kind = wi )  :: mtinit = .false._wi ! means mt[N] is not initialized
!  integer( kind = wi )  :: mti = n + 1_wi ! mti==N+1 means mt[N] is not initialized
  integer( kind = wi ), public  :: mt(n)          ! the array for the state vector
  logical( kind = wi ), public  :: mtinit = .false._wi ! means mt[N] is not initialized
  integer( kind = wi ), public  :: mti = n + 1_wi ! mti==N+1 means mt[N] is not initialized
! mz_pj_20060217-

  contains

  elemental function uiadd( a, b ) result( c )

    implicit none

    intrinsic :: ibits, ior, ishft

    integer( kind = wi ), intent( in )  :: a, b

    integer( kind = wi )  :: c

    integer( kind = wi )  :: a1, a2, b1, b2, s1, s2

    a1 = ibits( a, 0, hbs )
    a2 = ibits( a, hbs, hbs )
    b1 = ibits( b, 0, hbs )
    b2 = ibits( b, hbs, hbs )
    s1 = a1 + b1
    s2 = a2 + b2 + ibits( s1, hbs, hbs )
    c  = ior( ishft( s2, hbs ), ibits( s1, 0, hbs ) )

  end function uiadd

  elemental function uisub( a, b ) result( c )

    implicit none

    intrinsic :: ibits, ior, ishft

    integer( kind = wi ), intent( in )  :: a, b

    integer( kind = wi )  :: c

    integer( kind = wi )  :: a1, a2, b1, b2, s1, s2

    a1 = ibits( a, 0, hbs )
    a2 = ibits( a, hbs, hbs )
    b1 = ibits( b, 0, hbs )
    b2 = ibits( b, hbs, hbs )
    s1 = a1 - b1
    s2 = a2 - b2 + ibits( s1, hbs, hbs )
    c  = ior( ishft( s2, hbs ), ibits( s1, 0, hbs ) )

  end function uisub

  elemental function uimlt( a, b ) result( c )

    implicit none

    intrinsic :: ibits, ior, ishft

    integer( kind = wi ), intent( in )  :: a, b

    integer( kind = wi )  :: c

    integer( kind = wi )  :: a0, a1, a2, a3
    integer( kind = wi )  :: b0, b1, b2, b3
    integer( kind = wi )  :: p0, p1, p2, p3

    a0 = ibits( a, 0, qbs )
    a1 = ibits( a, qbs, qbs )
    a2 = ibits( a, hbs, qbs )
    a3 = ibits( a, tbs, qbs )
    b0 = ibits( b, 0, qbs )
    b1 = ibits( b, qbs, qbs )
    b2 = ibits( b, hbs, qbs )
    b3 = ibits( b, tbs, qbs )
    p0 = a0 * b0
    p1 = a1 * b0 + a0 * b1 + ibits( p0, qbs, tbs )
    p2 = a2 * b0 + a1 * b1 + a0 * b2 + ibits( p1, qbs, tbs )
    p3 = a3 * b0 + a2 * b1 + a1 * b2 + a0 * b3 + ibits( p2, qbs, tbs )
    c  = ior( ishft( p1, qbs ), ibits( p0, 0, qbs ) )
    c  = ior( ishft( p2, hbs ), ibits( c, 0, hbs ) )
    c  = ior( ishft( p3, tbs ), ibits( c, 0, tbs ) )

  end function uimlt

  ! initializes mt[N] with a seed
  subroutine init_genrand( s )

    implicit none

    intrinsic :: ishft, ieor, ibits

    integer( kind = wi ), intent( in )  :: s

    integer( kind = wi )  :: i, mult_a

    data mult_a /z'6C078965'/

    mtinit = .true._wi
    mt(1) = ibits( s, 0, 32 )
    do i = 2, n, 1
      mt(i) = ieor( mt(i-1), ishft( mt(i-1), -30 ) )
      mt(i) = uimlt( mt(i), mult_a )
      mt(i) = uiadd( mt(i), uisub( i, 1_wi ) )
      ! See Knuth TAOCP Vol2. 3rd Ed. P.106 for multiplier.
      ! In the previous versions, MSBs of the seed affect
      ! only MSBs of the array mt[].
      ! 2002/01/09 modified by Makoto Matsumoto
      mt(i) = ibits( mt(i), 0, 32 )
      ! for >32 bit machines
    end do
    mti = n + 1_wi ! op_pj_20121022
  end subroutine init_genrand

  ! initialize by an array with array-length
  ! init_key is the array for initializing keys
  ! key_length is its length
  subroutine init_by_array( init_key )

    implicit none

    intrinsic :: ishft, ieor

    integer( kind = wi ), intent( in )  :: init_key(:)

    integer( kind = wi )  :: i, j, k, tp, key_length
    integer( kind = wi )  :: seed_d, mult_a, mult_b, msb1_d

    data seed_d /z'12BD6AA'/
    data mult_a /z'19660D'/
    data mult_b /z'5D588B65'/
    data msb1_d /z'80000000'/

    key_length = size( init_key, dim = 1 )
    call init_genrand( seed_d )
    i = 2_wi
    j = 1_wi
    do k = max( n, key_length ), 1, -1
      tp = ieor( mt(i-1), ishft( mt(i-1), -30 ) )
      tp = uimlt( tp, mult_a )
      mt(i) = ieor( mt(i), tp )
      mt(i) = uiadd( mt(i), uiadd( init_key(j), uisub( j, 1_wi ) ) ) ! non linear
      mt(i) = ibits( mt(i), 0, 32 ) ! for WORDSIZE > 32 machines
      i = i + 1_wi
      j = j + 1_wi
      if ( i > n ) then
        mt(1) = mt(n)
        i = 2_wi
      end if
      if ( j > key_length) j = 1_wi
    end do
    do k = n-1, 1, -1
      tp = ieor( mt(i-1), ishft( mt(i-1), -30 ) )
      tp = uimlt( tp, mult_b )
      mt(i) = ieor( mt(i), tp )
      mt(i) = uisub( mt(i), uisub( i, 1_wi ) ) ! non linear
      mt(i) = ibits( mt(i), 0, 32 ) ! for WORDSIZE > 32 machines
      i = i + 1_wi
      if ( i > n ) then
        mt(1) = mt(n)
        i = 2_wi
      end if
    end do
    mt(1) = msb1_d ! MSB is 1; assuring non-zero initial array
  end subroutine init_by_array

  ! generates a random number on [0,0xffffffff]-interval
  function genrand_int32( ) result( y )

    implicit none

    intrinsic :: iand, ishft, ieor, btest, mvbits

    integer( kind = wi )  :: y

    integer( kind = wi )  :: kk
    integer( kind = wi )  :: seed_d, matrix_a, matrix_b, temper_a, temper_b

! op_pj_20121022+
!!$    data seed_d   /z'5489'/
    data seed_d   /4357/
! op_pj_20121022-
    data matrix_a /z'9908B0DF'/
    data matrix_b /z'0'/
    data temper_a /z'9D2C5680'/
    data temper_b /z'EFC60000'/

    if ( mti > n ) then ! generate N words at one time
      if ( .not. mtinit ) call init_genrand( seed_d ) ! if init_genrand() has not been called, a default initial seed is used
      do kk = 1, n-m, 1
        y = ibits( mt(kk+1), 0, 31 )
        call mvbits( mt(kk), 31, 1, y, 31 )
        if ( btest( y, 0 ) ) then
          mt(kk) = ieor( ieor( mt(kk+m), ishft( y, -1 ) ), matrix_a )
        else
          mt(kk) = ieor( ieor( mt(kk+m), ishft( y, -1 ) ), matrix_b )
        end if
      end do
      do kk = n-m+1, n-1, 1
        y = ibits( mt(kk+1), 0, 31 )
        call mvbits( mt(kk), 31, 1, y, 31 )
        if ( btest( y, 0 ) ) then
          mt(kk) = ieor( ieor( mt(kk+m-n), ishft( y, -1 ) ), matrix_a )
        else
          mt(kk) = ieor( ieor( mt(kk+m-n), ishft( y, -1 ) ), matrix_b )
        end if
      end do
      y = ibits( mt(1), 0, 31 )
      call mvbits( mt(n), 31, 1, y, 31 )
      if ( btest( y, 0 ) ) then
        mt(kk) = ieor( ieor( mt(m), ishft( y, -1 ) ), matrix_a )
      else
        mt(kk) = ieor( ieor( mt(m), ishft( y, -1 ) ), matrix_b )
      end if
      mti = 1_wi
    end if
    y = mt(mti)
    mti = mti + 1_wi
    ! Tempering
    y = ieor( y, ishft( y, -11) )
    y = ieor( y, iand( ishft( y, 7 ), temper_a ) )
    y = ieor( y, iand( ishft( y, 15 ), temper_b ) )
    y = ieor( y, ishft( y, -18 ) )

  end function genrand_int32

  ! generates a random number on [0,0x7fffffff]-interval
  function genrand_int31( ) result( i )

    implicit none

    intrinsic :: ishft

    integer( kind = wi )  :: i

    i = ishft( genrand_int32( ), -1 )

  end function genrand_int31

  ! generates a random number on [0,1]-real-interval
  function genrand_real1( ) result( r )

    implicit none

    real( kind = wr )  :: r

    integer( kind = wi )  :: a, a1, a0

    a = genrand_int32( )
    a0 = ibits( a, 0, hbs )
    a1 = ibits( a, hbs, hbs )
    r = real( a0, kind = wr ) / 4294967295.0_wr
    r = real( a1, kind = wr ) * ( 65536.0_wr / 4294967295.0_wr ) + r
    ! divided by 2^32-1

  end function genrand_real1

  ! generates a random number on [0,1)-real-interval
  function genrand_real2( ) result( r )

    implicit none

    intrinsic :: ibits

    real( kind = wr )  :: r

    integer( kind = wi )  :: a, a1, a0

    a = genrand_int32( )
    a0 = ibits( a, 0, hbs )
    a1 = ibits( a, hbs, hbs )
    r = real( a0, kind = wr ) / 4294967296.0_wr
    r = real( a1, kind = wr ) / 65536.0_wr + r
    ! divided by 2^32

  end function genrand_real2

  ! generates a random number on (0,1)-real-interval
  function genrand_real3( ) result( r )

    implicit none

    real( kind = wr )  :: r

    integer( kind = wi )  :: a, a1, a0

    a = genrand_int32( )
    a0 = ibits( a, 0, hbs )
    a1 = ibits( a, hbs, hbs )
    r = ( real( a0, kind = wr ) + 0.5_wr ) / 4294967296.0_wr
    r = real( a1, kind = wr ) / 65536.0_wr + r
    ! divided by 2^32

  end function genrand_real3

  ! generates a random number on [0,1) with 53-bit resolution
  function genrand_res53( )  result( r )

    implicit none

    intrinsic :: ishft

    real( kind = wr )  :: r

    integer( kind = wi )  :: a, a0, a1
    integer( kind = wi )  :: b, b0, b1

    a = ishft( genrand_int32( ), -5 )
    a0 = ibits( a, 0, hbs )
    a1 = ibits( a, hbs, hbs )
    b = ishft( genrand_int32( ), -6 )
    b0 = ibits( b, 0, hbs )
    b1 = ibits( b, hbs, hbs )
    r = real( a1, kind = wr ) / 2048.0_wr
    r = real( a0, kind = wr ) / 134217728.0_wr + r
    r = real( b1, kind = wr ) / 137438953472.0_wr + r
    r = real( b0, kind = wr ) / 9007199254740992.0_wr + r

  end function genrand_res53
  ! These real versions are due to Isaku Wada, 2002/01/09 added

end module messy_main_rnd_mtw
