# Supplementary material for: Oxidation of low-molecular weight organic compounds in clouddroplets: development of the JAMOC chemical mechanism inCAABA/MECCA (version 4.5.0gmdd)
Source: Copernicus journal article supplement (doi:10.5194/gmd-2020-337), 2020-10-29
Supplement: Supplementary file 20 [file gmd-2020-337-supplement.zip › caaba_4.5.0gmdd/ncv]

#! /bin/tcsh -f
# Time-stamp: <2020-08-31 17:05:54 sander>
# create a self-consistent zip file of a new caaba version

set dontedit = "created automatically by ncv, DO NOT EDIT\!"
set current_version = `grep -i "modver *=" messy_mecca.f90 | sed "s/.*'\(.*\)'.*/\1/g"`

if ( "$1" == "" ) then
  echo ""
  echo "Info (before making a new version):"
  set version = `date +'%Y%m%d_%H%M%S'`
  echo "- Add all changes and current date to CHANGELOG,"
  echo "  update version number (modver = '$current_version'):"
  echo
  echo "  e CHANGELOG messy_mecca.f90"
  echo
  echo "- Enter standard settings:"
  echo "  - Makefile:         COMPILER = g95"
  echo "                      F90FLAGS = with checks"
  echo
  echo "- Run model and plot results with:"
  echo "  ./xcaaba.py -b mbl"
  echo
  echo "Usage:"
  echo "  ncv nn"
  echo "  (nn = version number)"
  echo "Examples:"
  echo "  snapshot with current date:        ncv $version"
  echo "  proper version number, e.g.:       ncv $current_version"
  echo ""
  exit
else
  set version = $1
endif

# if (! -e mecca/smcl/messy_mecca_kpp_parameters.f90) then
#   echo;echo "Please run xmecca with KPP (not KP4) before executing ncv\!"
#   exit 1
# endif

if (! -e sfmakedepend) then
  echo;echo "The perl script sfmakedepend does not exist. Please run"
  echo "configure to create it from sfmakedepend.pl.in:"
  echo "  ( cd ../../.. ; ./configure ; cd - )" ; echo
  exit 1
endif

##############################################################################

# check for changed internal links and update _internal_links.tcsh:
_update_internal_links.tcsh
if ( $status != '0' ) exit 1

##############################################################################

set basedir = `basename $PWD`
set dirname = ${basedir}_$version
set oridir  = $HOME/messy/mecca/ori

if ( -d $oridir) then
  set zipfile = $oridir/$dirname.zip
else
  cd ..
  set zipfile = $PWD/$dirname.zip
  cd -
endif

if ( -e $zipfile) then
  echo;echo "Error, the zip file exists already:"
  ls -la $zipfile
  echo "Please choose another version number\!"
  exit 1
endif

set infofile = "manual/mecca_info.tex"
echo "% $dontedit"                            > $infofile
echo "\\def\\meccaversion{$current_version}" >> $infofile

echo "Update meccanism.pdf and caaba_mecca_manual.pdf? [y/n/q, default=y]"
set inputstring = $<
if ( $inputstring == 'q' ) exit
if ( $inputstring != 'n' ) then
  # select full mechanism:
  cd mecca
  xmecca latex
  cd -
  # run pdflatex:
  cd mecca/latex
  ./xmeccanism
  cd -
  # move meccanism.pdf to manual/ directory, otherwise it would be
  # deleted by "xmecca simple":
  mv mecca/latex/meccanism.pdf manual/meccanism.pdf
  # user manual:
  cd manual
  gmake
  cd -
endif

# select simple mechanism:
cd mecca
xmecca simple
cd -
ln -fs nml/caaba_simple.nml caaba.nml

echo "\nCreating zip file"
echo "$zipfile"
echo "Continue? [y/n/q, default=y]"
set inputstring = $<
if ( $inputstring == 'q' ) exit
if ( $inputstring == 'n' ) exit

# temporarily rename the caaba directory to include the version:
cd .. ; mv $basedir $dirname ; cd $dirname

# create zip file:
_zipcaaba.tcsh zip

# rename the caaba directory back to its original name:
cd .. ; mv $dirname $basedir ; cd $basedir

# move zip file to final directory:
mv $dirname.zip $zipfile

echo;echo "The zipfile has been created:"
ls -la $zipfile

exit

##############################################################################
