# Supplementary material for: Oxidation of low-molecular weight organic compounds in clouddroplets: development of the JAMOC chemical mechanism inCAABA/MECCA (version 4.5.0gmdd)
Source: Copernicus journal article supplement (doi:10.5194/gmd-2020-337), 2020-10-29
Supplement: Supplementary file 20 [file gmd-2020-337-supplement.zip › caaba_4.5.0gmdd/skeleton/depend.mk]

# DO NOT DELETE THIS LINE - used by make depend
drgep.o: messy_main_constants_mem.o
m_mrgref.o: messy_mecca_kpp_precision.o
messy_mecca_kpp_function.o: messy_mecca_kpp_parameters.o
messy_mecca_kpp_parameters.o: messy_mecca_kpp_precision.o
oic.o: drgep.o graph_search.o m_mrgref.o messy_main_constants_mem.o
oic.o: messy_mecca_kpp_function.o messy_mecca_kpp_monitor.o
oic.o: messy_mecca_kpp_parameters.o
