# Supplementary material for: Oxidation of low-molecular weight organic compounds in clouddroplets: development of the JAMOC chemical mechanism inCAABA/MECCA (version 4.5.0gmdd)
Source: Copernicus journal article supplement (doi:10.5194/gmd-2020-337), 2020-10-29
Supplement: Supplementary file 20 [file gmd-2020-337-supplement.zip › caaba_4.5.0gmdd/skeleton/EQN_NAMES.dat]

             O1D + O2 --> O3P + O2
             O3P + O2 --> O3
             O3 + O1D --> 2 O2
             O3 + O3P --> 2 O2
               H + O2 --> HO2
               H + O3 --> OH + O2
             H2 + O1D --> H + OH
             O3P + OH --> H + O2
              O3 + OH --> HO2 + O2
              H2 + OH --> H + H2O
            O3P + HO2 --> OH + O2
             O3 + HO2 --> OH + 2 O2
              H + HO2 --> 2 OH
              H + HO2 --> H2 + O2
              H + HO2 --> O3P + H2O
             OH + HO2 --> H2O + O2
                2 HO2 --> H2O2 + O2
            H2O + O1D --> 2 OH
            H2O2 + OH --> HO2 + H2O
                2 H2O --> H2OH2O
               H2OH2O --> 2 H2O
               N + O2 --> O3P + NO
             O1D + N2 --> O3P + N2
            N2O + O1D --> 2 NO
            N2O + O1D --> O2 + N2
              O3 + NO --> NO2 + O2
               N + NO --> O3P + N2
            O3P + NO2 --> NO + O2
             O3 + NO2 --> NO3 + O2
              N + NO2 --> N2O + O3P
             NO + NO3 --> 2 NO2
            NO3 + NO2 --> N2O5
                 N2O5 --> NO3 + NO2
              NO + OH --> HONO
             NO + HO2 --> OH + NO2
             OH + NO2 --> HNO3
            HO2 + NO2 --> HNO4
            NO3 + HO2 --> OH + NO2 + O2
            HONO + OH --> H2O + NO2
            HNO3 + OH --> NO3 + H2O
                 HNO4 --> HO2 + NO2
            HNO4 + OH --> H2O + NO2
             NH3 + OH --> NH2 + H2O
             NH2 + O3 --> NH2O + O2
            NH2 + HO2 --> NH2O + OH
            NH2 + HO2 --> HNO + H2O
             NH2 + NO --> OH + HO2 + N2
             NH2 + NO --> H2O + N2
            NH2 + NO2 --> N2O + H2O
            NH2 + NO2 --> NH2O + NO
            NH2O + O3 --> NH2 + O2
                 NH2O --> NHOH
             HNO + OH --> NO + H2O
           NHOH + HNO --> NH2OH + NO
            HNO + NO2 --> HONO + NO
            NHOH + OH --> HNO + H2O
           NH2OH + OH --> NHOH + H2O
             HNO + O2 --> NO + HO2
            CH4 + O1D --> 0.05 H2 + 0.4 H + 0.75 CH3 + 0.25 HCHO + 0.75 OH
             CH4 + OH --> CH3 + H2O
           CH3OH + OH --> 0.15 CH3O + 0.85 HCHO + 0.85 HO2 + H2O
          CH3O2 + HO2 --> CH3OOH + O2
          CH3O2 + HO2 --> HCHO + H2O + O2
           NO + CH3O2 --> CH3O + NO2
           NO + CH3O2 --> CH3NO3
          CH3O2 + NO3 --> CH3O + NO2 + O2
                CH3O2 --> CH3O + 0.5 O2
                CH3O2 --> 0.5 CH3OH + 0.5 HCHO + 0.5 O2
          CH3OOH + OH --> 0.6 CH3O2 + 0.4 HCHO + 0.4 OH + H2O
            HCHO + OH --> CO + HO2 + H2O
           NO3 + HCHO --> HNO3 + CO + HO2
              CO + OH --> H + CO2
           HCOOH + OH --> HO2 + H2O + CO2
             CO + O3P --> CO2
            CH4 + O3P --> 0.49 H + 0.51 CH3 + 0.49 CH3O + 0.51 OH
          CH3O2 + NO2 --> CH3O2NO2
             CH3O2NO2 --> CH3O2 + NO2
        CH3O2NO2 + OH --> NO3 + HCHO + H2O
          CH3NO3 + OH --> HCHO + H2O + NO2
                 CH3O --> HCHO + HO2
           CH3O + NO2 --> CH3NO3
           CH3O + NO2 --> HONO + HCHO
            CH3O + NO --> CH3ONO
            CH3O + NO --> HNO + HCHO
           O3 + CH3O2 --> CH3O + 2 O2
          CH3ONO + OH --> NO + HCHO + H2O
           HCHO + HO2 --> HOCH2O2
              HOCH2O2 --> HCHO + HO2
        HOCH2O2 + HO2 --> 0.5 HOCH2OOH + 0.5 HCOOH + 0.2 OH + 0.2 HO2 + 0.3 H2O ... etc.
         HOCH2O2 + NO --> HCOOH + HO2 + NO2
        HOCH2O2 + NO3 --> HCOOH + HO2 + NO2
              HOCH2O2 --> HCOOH + HO2
              HOCH2O2 --> 0.5 HOCH2OH + 0.5 HCOOH + 0.5 O2
        HOCH2OOH + OH --> HOCH2O2 + H2O
        HOCH2OOH + OH --> HCOOH + OH + H2O
         HOCH2OH + OH --> HCOOH + HO2 + H2O
           CH3O2 + OH --> CH3O + HO2
                CH2OO --> CO + OH + HO2
          CH2OO + H2O --> HOCH2OOH
       H2OH2O + CH2OO --> HOCH2OOH + H2O
           CH2OO + NO --> HCHO + NO2
          CH2OO + NO2 --> NO3 + HCHO
           CH2OO + CO --> HCHO + CO2
        CH2OO + HCOOH --> 2 HCOOH
         CH2OO + HCHO --> 2 LCARBON
        CH3OH + CH2OO --> 2 LCARBON
        CH2OO + CH3O2 --> 2 LCARBON
          CH2OO + HO2 --> LCARBON
           CH2OO + O3 --> HCHO + 2 O2
              2 CH2OO --> 2 HCHO + O2
        HOCH2O2 + NO2 --> HOCH2O2NO2
           HOCH2O2NO2 --> HOCH2O2 + NO2
      HOCH2O2NO2 + OH --> HCOOH + NO3 + H2O
             CH3 + O2 --> CH3O2
             CH3 + O3 --> 0.956 H + 0.044 CH3O + 0.956 HCHO + O2
            CH3 + O3P --> 0.17 H2 + H + 0.17 CO + 0.83 HCHO
            CH3O + O3 --> CH3O2 + O2
           CH3O + O3P --> 0.75 CH3 + 0.25 HCHO + 0.25 OH + 0.75 O2
          O3P + CH3O2 --> CH3O + O2
           O3P + HCHO --> 0.3 H + 0.7 CO + 0.7 OH + HO2 + 0.3 CO2
               CH2OOA --> 0.37 CH2OO + 0.63 CO + 0.16 OH + 0.16 HO2 + 0.47 H2O ... etc.
             HCN + OH --> CN + H2O
            HCN + O1D --> HCN + O3P
            HCN + O1D --> NCO + H
            HCN + O1D --> CN + OH
            HCN + O3P --> NCO + H
              CN + O2 --> NCO + O3P
              CN + O2 --> CO + NO
             NCO + O2 --> NO + CO2
            C2H6 + OH --> C2H5O2 + H2O
            C2H4 + O3 --> CH2OOA + HCHO
            C2H4 + OH --> HOCH2CH2O2
         C2H5O2 + HO2 --> C2H5OOH
          C2H5O2 + NO --> CH3CHO + HO2 + NO2
          C2H5O2 + NO --> C2H5NO3
         C2H5O2 + NO3 --> CH3CHO + HO2 + NO2
               C2H5O2 --> 0.2 C2H5OH + 0.8 CH3CHO + 0.6 HO2
         C2H5OOH + OH --> C2H5O2 + H2O
         C2H5OOH + OH --> CH3CHO + OH
          CH3CHO + OH --> CH3CO + H2O
          CH3CHO + OH --> HCOCH2O2 + H2O
         CH3CHO + NO3 --> HNO3 + CH3CO
         CH3CO2H + OH --> CH3 + H2O + CO2
         CH3CO3 + HO2 --> CH3 + OH + CO2
         CH3CO3 + HO2 --> CH3CO3H
         CH3CO3 + HO2 --> CH3CO2H + O3
          CH3CO3 + NO --> CH3 + NO2 + CO2
         CH3CO3 + NO2 --> PAN
         CH3CO3 + NO3 --> CH3 + NO2 + CO2
               CH3CO3 --> CH3 + CO2
               CH3CO3 --> CH3CO2H
         CH3CO3H + OH --> CH3CO3 + H2O
             PAN + OH --> CO + HCHO + H2O + NO2
                  PAN --> CH3CO3 + NO2
            C2H2 + OH --> GLYOX + OH
            C2H2 + OH --> HCOOH + CO + HO2
        HOCH2CHO + OH --> HOCH2CO + H2O
        HOCH2CHO + OH --> HOCHCHO + H2O
         HOCH2CO + O2 --> HOCH2CO3
         HOCH2CO + O2 --> HCHO + OH + CO2
              HOCHCHO --> GLYOX + HO2
       HOCH2CHO + NO3 --> HOCH2CO + HNO3
             HOCH2CO3 --> HCHO + HO2 + CO2
             HOCH2CO3 --> HOCH2CO2H
       HOCH2CO3 + HO2 --> HCHO + OH + HO2 + CO2
       HOCH2CO3 + HO2 --> HOCH2CO3H
       HOCH2CO3 + HO2 --> HOCH2CO2H + O3
        HOCH2CO3 + NO --> HCHO + HO2 + NO2 + CO2
       HOCH2CO3 + NO2 --> PHAN
       HOCH2CO3 + NO3 --> HCHO + HO2 + NO2 + CO2
       HOCH2CO2H + OH --> 0.91 HCOCO2H + 0.09 HCHO + HO2 + H2O + 0.09 CO2
       HOCH2CO3H + OH --> HOCH2CO3 + H2O
       HOCH2CO3H + OH --> HCOCO3H + HO2
                 PHAN --> HOCH2CO3 + NO2
            PHAN + OH --> CO + HCHO + H2O + NO2
           GLYOX + OH --> HCOCO + H2O
          GLYOX + NO3 --> HCOCO + HNO3
                HCOCO --> 2 CO + HO2
                HCOCO --> HCOCO3
                HCOCO --> CO + OH + CO2
               HCOCO3 --> CO + HO2 + CO2
               HCOCO3 --> HCOCO2H
         HCOCO3 + HO2 --> CO + OH + HO2 + CO2
          HCOCO3 + NO --> CO + HO2 + NO2 + CO2
         HCOCO3 + NO3 --> CO + HO2 + NO2 + CO2
         HCOCO3 + NO2 --> CO + NO3 + HO2 + CO2
         HCOCO2H + OH --> CO + HO2 + H2O + CO2
         HCOCO3H + OH --> HCOCO3 + H2O
         HCOCO3H + OH --> CO + OH + H2O + CO2
           HOCH2CH2O2 --> 0.2 ETHGLY + 0.6 HOCH2CH2O + 0.2 HOCH2CHO
      HOCH2CH2O2 + NO --> 0.75 HOCH2CH2O + 0.5 HCHO + 0.25 HO2 + NO2
      HOCH2CH2O2 + NO --> ETHOHNO3
     HOCH2CH2O2 + HO2 --> HYETHO2H
     HOCH2CH2O2 + HO2 --> HOCH2CH2O + OH
        ETHOHNO3 + OH --> 0.93 NO3CH2CHO + 0.07 HOCH2CHO + 0.93 HO2 + H2O + 0.07 NO2 ... etc.
        HYETHO2H + OH --> HOCH2CH2O2 + H2O
        HYETHO2H + OH --> HOCH2CHO + OH + H2O
        HYETHO2H + OH --> HOOCH2CHO + HO2 + H2O
            HOCH2CH2O --> HOCH2CHO + HO2
            HOCH2CH2O --> 2 HCHO + HO2
          ETHGLY + OH --> HOCH2CHO + HO2 + H2O
             HCOCH2O2 --> 0.2 GLYOX + 0.2 HOCH2CHO + 0.6 CO + 0.6 HCHO + 0.6 HO2 ... etc.
       HCOCH2O2 + HO2 --> HOOCH2CHO
       HCOCH2O2 + HO2 --> CO + HCHO + OH + HO2
        HCOCH2O2 + NO --> CO + HCHO + HO2 + NO2
        HCOCH2O2 + NO --> NO3CH2CHO
       HCOCH2O2 + NO3 --> CO + HCHO + HO2 + NO2
       HOOCH2CHO + OH --> HCOCH2O2
       HOOCH2CHO + OH --> CO + HCHO + OH
       HOOCH2CHO + OH --> GLYOX + OH
      HOOCH2CHO + NO3 --> HNO3 + CO + HCHO + OH
       HOOCH2CO3 + NO --> HCHO + OH + NO2 + CO2
      HOOCH2CO3 + NO3 --> HCHO + OH + NO2 + CO2
      HOOCH2CO3 + HO2 --> HCHO + 2 OH + CO2
      HOOCH2CO3 + HO2 --> HOOCH2CO3H
      HOOCH2CO3 + HO2 --> HOOCH2CO2H + O3
            HOOCH2CO3 --> HCHO + OH + CO2
            HOOCH2CO3 --> HOOCH2CO2H
      HOOCH2CO3H + OH --> HOOCH2CO3 + H2O
      HOOCH2CO3H + OH --> HCOCO3H + OH + H2O
      HOOCH2CO2H + OH --> HCOCO2H + OH + H2O
           CH2CO + OH --> 0.4 HOOCH2CO2H + 0.6 CO + 0.6 HCHO + 0.6 HO2
      CH3CHOHOOH + OH --> CH3CO2H + OH
      CH3CHOHOOH + OH --> CH3CHOHO2
            CH3CHOHO2 --> CH3CHO + HO2
         CH3CHO + HO2 --> CH3CHOHO2
      CH3CHOHO2 + HO2 --> 0.3 CH3CO2H + 0.5 CH3CHOHOOH + 0.2 CH3 + 0.2 HCOOH + 0.2 OH ... etc.
            CH3CHOHO2 --> CH3 + HCOOH + OH
       CH3CHOHO2 + NO --> CH3 + HCOOH + OH + NO2
         C2H5NO3 + OH --> CH3CHO + H2O + NO2
       NO3CH2CHO + OH --> GLYOX + H2O + NO2
       NO3CH2CHO + OH --> NO3CH2CO3 + H2O
      NO3CH2CO3 + HO2 --> HCHO + OH + NO2 + CO2
       NO3CH2CO3 + NO --> HCHO + 2 NO2 + CO2
      NO3CH2CO3 + NO2 --> NO3CH2PAN
            NO3CH2CO3 --> HCHO + NO2 + CO2
            NO3CH2PAN --> NO3CH2CO3 + NO2
         C2H5O2 + NO2 --> C2H5O2NO2
            C2H5O2NO2 --> C2H5O2 + NO2
       C2H5O2NO2 + OH --> CH3CHO + NO3 + H2O
           CH3CO + O2 --> CH3CO3
           CH3CO + O2 --> CO + HCHO + OH
          C2H5OH + OH --> 0.95 C2H5O2 + 0.05 HOCH2CH2O2 + 0.95 HO2 + H2O
           CH3CN + OH --> NCCH2O2 + H2O
           CH3CN + OH --> CH3CO + NO + OH
          CH3CN + O1D --> CH3CN + O3P
          CH3CN + O1D --> HCN + 2 H + CO
          CH3CN + O1D --> 0.5 NCO + 0.5 NCCH2O2 + 0.5 CH3 + 0.5 OH
         NCCH2O2 + NO --> HCN + HO2 + NO2 + CO2
        NCCH2O2 + HO2 --> HCN + HO2 + CO2
         CH2CHOH + OH --> HCOOH + HCHO + OH
         CH2CHOH + OH --> HOCH2CHO + HO2
      CH2CHOH + HCOOH --> CH3CHO + HCOOH
       CH3CHO + HCOOH --> CH2CHOH + HCOOH
            C3H8 + OH --> IC3H7O2 + H2O
            C3H8 + OH --> NC3H7O2 + H2O
            C3H6 + O3 --> 0.16 CH3CHOHOOH + 0.05 CH2CO + 0.09 CH3OH + 0.2 CH4 ... etc.
            C3H6 + O3 --> CH2OOA + CH3CHO
            C3H6 + OH --> HYPROPO2
           C3H6 + NO3 --> PRONO3BO2
        IC3H7O2 + HO2 --> IC3H7OOH
         IC3H7O2 + NO --> CH3COCH3 + HO2 + NO2
         IC3H7O2 + NO --> IC3H7NO3
              IC3H7O2 --> 0.2 IPROPOL + 0.8 CH3COCH3 + 0.6 HO2
        IC3H7OOH + OH --> IC3H7O2 + H2O
        IC3H7OOH + OH --> CH3COCH3 + OH + H2O
        NC3H7O2 + HO2 --> NC3H7OOH
         NC3H7O2 + NO --> C2H5CHO + HO2 + NO2
         NC3H7O2 + NO --> NC3H7NO3
              NC3H7O2 --> 0.2 NPROPOL + 0.8 CH3COCH3 + 0.6 HO2
        CH3COCH3 + OH --> CH3COCH2O2 + H2O
     CH3COCH2O2 + HO2 --> HYPERACET
     CH3COCH2O2 + HO2 --> CH3CO + HCHO + OH
      CH3COCH2O2 + NO --> CH3CO + HCHO + NO2
      CH3COCH2O2 + NO --> NOA
           CH3COCH2O2 --> 0.2 ACETOL + 0.5 MGLYOX + 0.3 CH3CO + 0.3 HCHO
       HYPERACET + OH --> CH3COCH2O2 + H2O
       HYPERACET + OH --> MGLYOX + OH + H2O
          ACETOL + OH --> MGLYOX + HO2 + H2O
          MGLYOX + OH --> 0.6 CH3CO + 0.4 CH3 + 1.4 CO + H2O
        IC3H7NO3 + OH --> CH3COCH3 + NO2
     CH3COCH2O2 + NO3 --> CH3CO + HCHO + NO2
             HYPROPO2 --> CH3CHO + HCHO + HO2
       HYPROPO2 + HO2 --> HYPROPO2H
       HYPROPO2 + HO2 --> CH3CHO + HCHO + OH + HO2
        HYPROPO2 + NO --> CH3CHO + HCHO + HO2 + NO2
        HYPROPO2 + NO --> PROPOLNO3
       HYPROPO2 + NO3 --> CH3CHO + HCHO + HO2 + NO2
       HYPROPO2H + OH --> HYPROPO2
       HYPROPO2H + OH --> ACETOL + OH
      PRONO3BO2 + HO2 --> PR2O2HNO3
       PRONO3BO2 + NO --> NOA + HO2 + NO2
      PRONO3BO2 + NO3 --> NOA + HO2 + NO2
       PR2O2HNO3 + OH --> PRONO3BO2
       PR2O2HNO3 + OH --> NOA + OH
         MGLYOX + NO3 --> HNO3 + CH3CO + CO
             NOA + OH --> MGLYOX + NO2
      HOCH2COCHO + OH --> 0.1391 C33CO + 0.8609 HOCH2CO + 0.8609 CO + 0.1391 HO2 ... etc.
     HOCH2COCHO + NO3 --> HOCH2CO + HNO3 + CO
       CH3COCO2H + OH --> CH3CO + H2O + CO2
           CHOCOCH2O2 --> 0.2 HOCH2COCHO + 0.2 C33CO + 0.6 HCOCO + 0.6 HCHO
      CHOCOCH2O2 + NO --> HCOCO + HCHO + NO2
     CHOCOCH2O2 + HO2 --> ALCOCH2OOH
     CHOCOCH2O2 + HO2 --> HCOCO + HCHO + OH
     CHOCOCH2O2 + NO3 --> HCOCO + HCHO + NO2
      ALCOCH2OOH + OH --> HOOCH2CO3 + CO + H2O
      ALCOCH2OOH + OH --> C33CO + OH + H2O
      ALCOCH2OOH + OH --> CHOCOCH2O2 + H2O
     ALCOCH2OOH + NO3 --> HOOCH2CO3 + HNO3 + CO
         HOCH2COCH2O2 --> HOCH2CO + HCHO
   HOCH2COCH2O2 + HO2 --> HOCH2COCH2OOH
   HOCH2COCH2O2 + HO2 --> HOCH2CO + HCHO + OH
    HOCH2COCH2O2 + NO --> HOCH2CO + HCHO + NO2
   HOCH2COCH2OOH + OH --> HOCH2COCHO + OH
   HOCH2COCH2OOH + OH --> HOCH2COCH2O2
   HOCH2COCH2OOH + OH --> HCOCOCH2OOH + HO2
         CH3CHCO + OH --> 0.21 CH3COCO2H + 0.79 CH3CHO + 0.72 CO + 0.79 HO2 + 0.07 CO2 ... etc.
       PROPOLNO3 + OH --> ACETOL + NO2
     CH3COCH2O2 + NO2 --> CH3COCH2O2NO2
        CH3COCH2O2NO2 --> CH3COCH2O2 + NO2
   CH3COCH2O2NO2 + OH --> MGLYOX + NO3 + H2O
        NC3H7OOH + OH --> NC3H7O2 + H2O
        NC3H7OOH + OH --> C2H5CHO + OH + H2O
        NC3H7OOH + OH --> C2H5CHO + HO2 + H2O
         C2H5CHO + OH --> C2H5CO3 + H2O
        C2H5CHO + NO3 --> C2H5CO3 + HNO3
              C2H5CO3 --> C2H5O2 + CO2
              C2H5CO3 --> PROPACID
        C2H5CO3 + HO2 --> C2H5O2 + OH + CO2
        C2H5CO3 + HO2 --> PERPROACID
        C2H5CO3 + HO2 --> PROPACID + O3
         C2H5CO3 + NO --> C2H5O2 + NO2 + CO2
        C2H5CO3 + NO2 --> PPN
                  PPN --> C2H5CO3 + NO2
        PROPACID + OH --> CH3CHO + H2O + CO2
      PERPROACID + OH --> C2H5CO3 + H2O
      PERPROACID + OH --> CH3CHO + H2O + CO2
             PPN + OH --> CH3CHO + H2O + NO2 + CO2
       CH3COCO3H + OH --> CH3COCO3 + H2O
       CH3COCO3 + HO2 --> CH3CO + OH + CO2
       CH3COCO3 + HO2 --> CH3COCO3H
        CH3COCO3 + NO --> CH3CO + NO2 + CO2
       CH3COCO3 + NO2 --> CH3CO + NO3 + CO2
       CH3COCO3 + NO3 --> CH3CO3 + NO2 + CO2
             CH3COCO3 --> CH3CO3 + CO2
           C33CO + OH --> 3 CO + HO2
         IPROPOL + OH --> CH3COCH3 + HO2 + H2O
         NPROPOL + OH --> C2H5CHO + HO2 + H2O
         NPROPOL + OH --> HYPROPO2 + H2O
        PROPENOL + OH --> CH3CHO + HCOOH + OH
     PROPENOL + HCOOH --> C2H5CHO + HCOOH
      C2H5CHO + HCOOH --> PROPENOL + HCOOH
     HCOCOCH2OOH + OH --> HCOCO + CO + OH + HO2
       HCOCH2CHO + OH --> HCOCH2CO3
      HCOCH2CHO + NO3 --> HCOCH2CO3 + HNO3
            HCOCH2CO3 --> HCOCH2O2 + CO2
            HCOCH2CO3 --> HCOCH2CO2H
       HCOCH2CO3 + NO --> HCOCH2O2 + NO2 + CO2
      HCOCH2CO3 + NO2 --> C3PAN2
      HCOCH2CO3 + HO2 --> HCOCH2CO3H
      HCOCH2CO3 + HO2 --> HCOCH2CO2H + O3
      HCOCH2CO3 + HO2 --> HCOCH2O2 + OH + CO2
               C3PAN2 --> HCOCH2CO3 + NO2
          C3PAN2 + OH --> GLYOX + CO + NO2
      HCOCH2CO2H + OH --> HCOCH2O2 + CO2
            HOC2H4CO3 --> HOCH2CH2O2 + CO2
            HOC2H4CO3 --> HOC2H4CO2H
       HOC2H4CO3 + NO --> HOCH2CH2O2 + NO2 + CO2
      HOC2H4CO3 + HO2 --> HOC2H4CO3H
      HOC2H4CO3 + HO2 --> HOCH2CH2O2 + OH + CO2
      HOC2H4CO3 + HO2 --> HOC2H4CO2H + O3
      HOC2H4CO3 + NO2 --> C3PAN1
      HOC2H4CO2H + OH --> HOCH2CH2O2 + CO2
      HOC2H4CO3H + OH --> HOC2H4CO3
               C3PAN1 --> HOC2H4CO3 + NO2
          C3PAN1 + OH --> HOCH2CHO + CO + NO2
      HCOCH2CO3H + OH --> HCOCH2O2 + H2O + CO2
       C3DIALOOH + OH --> C33CO + OH
       C3DIALO2 + HO2 --> C3DIALOOH
       C3DIALO2 + HO2 --> GLYOX + CO + OH + HO2
        C3DIALO2 + NO --> GLYOX + CO + HO2 + NO2
       C3DIALO2 + NO3 --> GLYOX + CO + HO2 + NO2
             C3DIALO2 --> GLYOX + CO + HO2
      HCOCOHCO3 + HO2 --> GLYOX + OH + HO2 + CO2
      HCOCOHCO3 + HO2 --> HCOCOHCO3H
       HCOCOHCO3 + NO --> GLYOX + HO2 + NO2 + CO2
      HCOCOHCO3 + NO2 --> HCOCOHPAN
      HCOCOHCO3 + NO3 --> GLYOX + HO2 + NO2 + CO2
            HCOCOHCO3 --> GLYOX + HO2 + CO2
       METACETHO + OH --> CH3CO + CO2
       HCOCOHPAN + OH --> GLYOX + CO + NO2
            HCOCOHPAN --> HCOCOHCO3 + NO2
       C32OH13CO + OH --> HCOCOHCO3
      HCOCOHCO3H + OH --> HCOCOHCO3
          NC4H10 + OH --> LC4H9O2 + H2O
              LC4H9O2 --> C3H7CHO + HO2
              LC4H9O2 --> 0.636 MEK + 0.364 C2H5O2 + 0.364 CH3CHO + 0.636 HO2 ... etc.
        LC4H9O2 + HO2 --> LC4H9OOH
         LC4H9O2 + NO --> C3H7CHO + HO2 + NO2
         LC4H9O2 + NO --> 0.636 MEK + 0.364 C2H5O2 + 0.364 CH3CHO + 0.636 HO2 ... etc.
         LC4H9O2 + NO --> LC4H9NO3
        LC4H9O2 + NO3 --> C3H7CHO + HO2 + NO2
        LC4H9O2 + NO3 --> 0.636 MEK + 0.364 C2H5O2 + 0.364 CH3CHO + 0.636 HO2 ... etc.
        LC4H9OOH + OH --> LC4H9O2 + H2O
        LC4H9OOH + OH --> C3H7CHO + OH + H2O
        LC4H9OOH + OH --> MEK + OH + H2O
          IC4H10 + OH --> TC4H9O2 + H2O
          IC4H10 + OH --> IC4H9O2 + H2O
              TC4H9O2 --> CH3COCH3 + CH3
        TC4H9O2 + HO2 --> TC4H9OOH
         TC4H9O2 + NO --> CH3COCH3 + CH3 + NO2
         TC4H9O2 + NO --> TC4H9NO3
        TC4H9OOH + OH --> TC4H9O2 + H2O
        TC4H9OOH + OH --> CH3COCH3 + HCHO + OH + H2O
        TC4H9NO3 + OH --> CH3COCH3 + HCHO + H2O + NO2
              IC4H9O2 --> IPRCHO
        IC4H9O2 + HO2 --> IC4H9OOH
         IC4H9O2 + NO --> IPRCHO + NO2
         IC4H9O2 + NO --> IC4H9NO3
        IC4H9OOH + OH --> IC4H9O2 + H2O
        IC4H9OOH + OH --> IPRCHO + OH + H2O
        IC4H9NO3 + OH --> IPRCHO + H2O + NO2
             MVK + O3 --> 0.02402 H2O2 + 0.00718 CH3COCO2H + 0.89402 MGLYOX + 0.0728 CH3CO ... etc.
             MVK + OH --> LHMVKABO2
             MEK + OH --> LMEKO2 + H2O
         LMEKO2 + HO2 --> LMEKOOH
          LMEKO2 + NO --> 0.38 HOCH2CH2O2 + 0.62 CH3CO + 0.62 CH3CHO + 0.38 HCHO ... etc.
          LMEKO2 + NO --> LMEKNO3
         LMEKOOH + OH --> LMEKO2 + H2O
         LMEKOOH + OH --> 0.62 BIACET + 0.38 HOCH2CH2O2 + 0.38 HCHO + OH + H2O ... etc.
        LC4H9NO3 + OH --> MEK + H2O + NO2
        LC4H9NO3 + OH --> C3H7CHO + H2O + NO2
            MPAN + OH --> ACETOL + CO + NO2
                 MPAN --> MACO3 + NO2
               LMEKO2 --> 0.079 C2H5O2 + 0.459 HOCH2CH2O2 + 0.462 CH3CO + 0.462 CH3CHO ... etc.
            MACR + OH --> 0.45 MACO3 + 0.55 MACRO2
            MACR + O3 --> 0.065 CHOCOCH2O2 + 0.87 MGLYOX + 0.065 CH3CO + 0.3219 CH2OO ... etc.
           MACR + NO3 --> MACO3 + HNO3
                MACO3 --> CH3CO + HCHO + CO2
                MACO3 --> MACO2H
          MACO3 + HO2 --> MACO2 + OH
          MACO3 + HO2 --> MACO3H
          MACO3 + HO2 --> MACO2H + O3
           MACO3 + NO --> MACO2 + NO2
          MACO3 + NO2 --> MPAN
          MACO3 + NO3 --> MACO2 + NO2
               MACRO2 --> 0.3 MACROH + 0.7 ACETOL + 0.7 HCHO + 0.7 HO2
         MACRO2 + HO2 --> MACRO + OH
         MACRO2 + HO2 --> MACROOH
          MACRO2 + NO --> MACRO + NO2
          MACRO2 + NO --> MACRNO3
         MACRO2 + NO3 --> MACRO + NO2
         MACROOH + OH --> MACRO2
         MACROOH + OH --> ACETOL + CO + OH
         MACROOH + OH --> MGLYOX + CO + HO2
          MACROH + OH --> ACETOL + CO + HO2
                MACRO --> 0.885 ACETOL + 0.115 MGLYOX + 0.885 CO + 0.115 HCHO ... etc.
          MACO2H + OH --> ACETOL + HO2 + CO2
          MACO3H + OH --> ACETOL + OH + CO2
          MACO3H + OH --> MACO3
            LHMVKABO2 --> 0.176 BIACETOH + 0.2 HO12CO3C4 + 0.072 MGLYOX + 0.024 CO2H3CHO ... etc.
      LHMVKABO2 + HO2 --> CH3CO + HOCH2CHO + OH
      LHMVKABO2 + HO2 --> LHMVKABOOH
       LHMVKABO2 + NO --> 0.12 MGLYOX + 0.88 CH3CO + 0.88 HOCH2CHO + 0.12 HCHO ... etc.
       LHMVKABO2 + NO --> MVKNO3
      LHMVKABO2 + NO3 --> 0.12 MGLYOX + 0.88 CH3CO + 0.88 HOCH2CHO + 0.12 HCHO ... etc.
      LHMVKABOOH + OH --> LHMVKABO2
      LHMVKABOOH + OH --> 0.88 BIACETOH + 0.12 CO2H3CHO + OH
        CO2H3CHO + OH --> CO2H3CO3
        CO2H3CHO + OH --> CO23C3CHO + HO2 + H2O
       CO2H3CHO + NO3 --> CO2H3CO3 + HNO3
             CO2H3CO3 --> MGLYOX + HO2 + CO2
       CO2H3CO3 + HO2 --> MGLYOX + OH + HO2 + CO2
       CO2H3CO3 + HO2 --> CO2H3CO2H + O3
       CO2H3CO3 + HO2 --> CO2H3CO3H
        CO2H3CO3 + NO --> MGLYOX + HO2 + NO2 + CO2
       CO2H3CO3 + NO3 --> MGLYOX + HO2 + NO2 + CO2
       CO2H3CO3H + OH --> CO2H3CO3
       CO2H3CO3H + OH --> CH3CO + CO + OH + CO2
       CO2H3CO2H + OH --> CH3COCOCO2H + HO2
       HO12CO3C4 + OH --> BIACETOH + HO2
       HO12CO3C4 + OH --> CO2H3CHO + HO2
                MACO2 --> 0.35 CH3COCH2O2 + 0.65 CH3 + 0.65 CO + 0.65 HCHO + 0.35 OH ... etc.
            LHMVKABO2 --> 0.12 HOOCH2CHO + 0.88 MGLYOX + 0.12 CH3CO + 0.88 HCHO ... etc.
               MACRO2 --> MGLYOX + HCHO + OH
          MVKNO3 + OH --> MGLYOX + HO2 + H2O + NO2 + CO2
          MVKNO3 + OH --> BIACETOH + H2O + NO2
         MACRNO3 + OH --> ACETOL + H2O + NO2 + CO2
         MACRNO3 + OH --> MGLYOX + CO + H2O + NO2
               MACRO2 --> ACETOL + CO + OH
        EZCH3CO2CHCHO --> 0.9 CH3COCHCO + 0.01 GLYOX + 0.1 CH3CO + 0.18 CO + OH ... etc.
  EZCH3CO2CHCHO + HO2 --> CH3COOHCHCHO
   EZCH3CO2CHCHO + NO --> CH3COCHO2CHO + NO2
  EZCH3CO2CHCHO + NO3 --> CH3COCHO2CHO + NO2
        EZCH3CO2CHCHO --> CH3COCHO2CHO
        EZCHOCCH3CHO2 --> HCOCCH3CO + OH
   EZCHOCCH3CHO2 + NO --> HCOCO2CH3CHO + NO2
  EZCHOCCH3CHO2 + HO2 --> HCOCCH3CHOOH
  EZCHOCCH3CHO2 + NO3 --> HCOCO2CH3CHO + NO2
        EZCHOCCH3CHO2 --> HCOCO2CH3CHO
         CH3COOHCHCHO --> CH3COCHO2CHO + OH
         HCOCCH3CHOOH --> HCOCO2CH3CHO + OH
    CH3COCHO2CHO + NO --> GLYOX + CH3CO + NO2
   CH3COCHO2CHO + NO3 --> GLYOX + CH3CO + NO2
   CH3COCHO2CHO + HO2 --> GLYOX + CH3CO + OH
         CH3COCHO2CHO --> GLYOX + CH3CO
         HCOCO2CH3CHO --> MGLYOX + CO + HO2
    HCOCO2CH3CHO + NO --> MGLYOX + CO + HO2 + NO2
   HCOCO2CH3CHO + HO2 --> MGLYOX + CO + OH + HO2
   HCOCO2CH3CHO + NO3 --> MGLYOX + CO + HO2 + NO2
       HCOCCH3CO + OH --> MGLYOX + CO + HO2
       CH3COCHCO + OH --> MGLYOX + CO + HO2
         LMEKNO3 + OH --> 0.38 NO3CH2CHO + 0.62 MGLYOX + 0.38 CH3CO + 0.62 HCHO ... etc.
       MEPROPENE + OH --> IBUTOLBO2
       MEPROPENE + O3 --> CH2OOA + CH3COCH3
       MEPROPENE + O3 --> CH3COCH2O2 + HCHO + OH
      MEPROPENE + NO3 --> CH3COCH3 + HCHO + NO2
            IBUTOLBO2 --> CH3COCH3 + HCHO + HO2
      IBUTOLBO2 + HO2 --> IBUTOLBOOH
      IBUTOLBO2 + HO2 --> CH3COCH3 + HCHO + OH + HO2
       IBUTOLBO2 + NO --> CH3COCH3 + HCHO + HO2 + NO2
       IBUTOLBO2 + NO --> IBUTOLBNO3
      IBUTOLBO2 + NO3 --> CH3COCH3 + HCHO + HO2 + NO2
      IBUTOLBOOH + OH --> IBUTOLBO2
      IBUTOLBOOH + OH --> CH3COCH3 + HCHO + HO2
      IBUTOLBNO3 + OH --> CH3COCH3 + HCHO + HO2 + NO2
         BUT1ENE + OH --> LBUT1ENO2
         BUT1ENE + O3 --> 0.5 C2H5CHO + 0.5 H2O2 + 0.5 CH3CHO + 0.5 CO + HCHO ... etc.
         BUT1ENE + O3 --> CH2OOA + C2H5CHO
        BUT1ENE + NO3 --> C2H5CHO + HCHO + NO2
            LBUT1ENO2 --> C2H5CHO + HCHO + HO2
      LBUT1ENO2 + HO2 --> LBUT1ENOOH
      LBUT1ENO2 + HO2 --> C2H5CHO + HCHO + OH + HO2
       LBUT1ENO2 + NO --> C2H5CHO + HCHO + HO2 + NO2
       LBUT1ENO2 + NO --> LBUT1ENNO3
      LBUT1ENO2 + NO3 --> C2H5CHO + HCHO + HO2 + NO2
      LBUT1ENOOH + OH --> LBUT1ENO2
      LBUT1ENOOH + OH --> C2H5CO3 + HCHO + HO2
      LBUT1ENNO3 + OH --> C2H5CHO + CO + HO2 + NO2
        CBUT2ENE + OH --> BUT2OLO2
        CBUT2ENE + O3 --> 0.16 CH3CHOHOOH + 0.05 CH2CO + 0.09 CH3OH + 0.2 CH4 ... etc.
       CBUT2ENE + NO3 --> 2 CH3CHO + NO2
        TBUT2ENE + OH --> BUT2OLO2
        TBUT2ENE + O3 --> 0.16 CH3CHOHOOH + 0.05 CH2CO + 0.09 CH3OH + 0.2 CH4 ... etc.
       TBUT2ENE + NO3 --> 2 CH3CHO + NO2
             BUT2OLO2 --> C2H5CHO + HCHO + HO2
       BUT2OLO2 + HO2 --> BUT2OLOOH
       BUT2OLO2 + HO2 --> 2 CH3CHO + OH + HO2
        BUT2OLO2 + NO --> 2 CH3CHO + HO2 + NO2
        BUT2OLO2 + NO --> BUT2OLNO3
       BUT2OLO2 + NO3 --> 2 CH3CHO + HO2 + NO2
       BUT2OLOOH + OH --> BUT2OLO2
       BUT2OLOOH + OH --> LMEKOOH + HO2
       BUT2OLOOH + OH --> BUT2OLO + OH
       BUT2OLNO3 + OH --> LMEKNO3 + HO2
         BUT2OLO + OH --> BIACET + HO2
          IPRCHO + OH --> IPRCO3 + H2O
         IPRCHO + NO3 --> IPRCO3 + HNO3
               IPRCO3 --> IC3H7O2 + CO2
         IPRCO3 + HO2 --> PERIBUACID
         IPRCO3 + HO2 --> IC3H7O2 + OH + CO2
         IPRCO3 + NO2 --> PIPN
          IPRCO3 + NO --> IC3H7O2 + NO2 + CO2
      PERIBUACID + OH --> IPRCO3 + H2O
      PERIBUACID + OH --> CH3COCH3 + H2O + CO2
                 PIPN --> IPRCO3 + NO2
            PIPN + OH --> CH3COCH3 + NO2 + CO2
       MPROPENOL + OH --> CH3COCH3 + HCOOH + OH
    MPROPENOL + HCOOH --> IPRCHO + HCOOH
       IPRCHO + HCOOH --> MPROPENOL + HCOOH
         BUTENOL + OH --> C2H5CHO + HCOOH + OH
      BUTENOL + HCOOH --> C3H7CHO + HCOOH
      C3H7CHO + HCOOH --> BUTENOL + HCOOH
            HVMK + OH --> MGLYOX + HCOOH + OH
         HVMK + HCOOH --> CO2C3CHO + HCOOH
     CO2C3CHO + HCOOH --> HVMK + HCOOH
            HMAC + OH --> MGLYOX + HCOOH + OH
         HMAC + HCOOH --> IBUTDIAL + HCOOH
     IBUTDIAL + HCOOH --> HMAC + HCOOH
        CO2C3CHO + OH --> CH3COCH2O2 + H2O + CO2
       CO2C3CHO + NO3 --> HNO3 + CH3COCH2O2 + CO2
        IBUTDIAL + OH --> CH3CHO + CO + HO2 + H2O + CO2
       IBUTDIAL + NO3 --> HNO3 + CH3CHO + CO + HO2 + CO2
             BIACETO2 --> CH3CO + CO + HCHO
       BIACETO2 + HO2 --> BIACETOOH
        BIACETO2 + NO --> CH3CO + CO + HCHO + NO2
       BIACETOOH + OH --> CO23C3CHO + OH
       BIACETOOH + OH --> BIACETO2
          C44O2 + HO2 --> C44OOH
           C44O2 + NO --> HCOCH2CHO + HO2 + NO2 + CO2
                C44O2 --> HCOCH2CHO + HO2 + CO2
          C44OOH + OH --> C44O2
            CHOC3COO2 --> HCOCH2CO3 + HCHO
      CHOC3COO2 + HO2 --> C413COOOH
       CHOC3COO2 + NO --> HCOCH2CO3 + HCHO + NO2
       C413COOOH + OH --> CHOC3COO2
        C4CODIAL + OH --> C312COCO3
       C4CODIAL + NO3 --> C312COCO3 + HNO3
            C312COCO3 --> CHOCOCH2O2 + CO2
      C312COCO3 + HO2 --> C312COCO3H
      C312COCO3 + HO2 --> CHOCOCH2O2 + OH + CO2
      C312COCO3 + NO2 --> C312COPAN
       C312COCO3 + NO --> CHOCOCH2O2 + NO2 + CO2
      C312COCO3H + OH --> C312COCO3
            C312COPAN --> C312COCO3 + NO2
       C312COPAN + OH --> C33CO + CO + NO2
       CO23C3CHO + OH --> CH3CO + 2 CO
      CO23C3CHO + NO3 --> HNO3 + CH3CO + 2 CO
        IBUTALOH + OH --> IPRHOCO3
       IPRHOCO3 + HO2 --> CH3COCH3 + OH + HO2 + CO2
       IPRHOCO3 + HO2 --> IPRHOCO2H + O3
       IPRHOCO3 + HO2 --> IPRHOCO3H
        IPRHOCO3 + NO --> CH3COCH3 + HO2 + NO2 + CO2
       IPRHOCO3 + NO2 --> C4PAN5
       IPRHOCO3 + NO3 --> CH3COCH3 + HO2 + NO2 + CO2
             IPRHOCO3 --> CH3COCH3 + HO2 + CO2
             IPRHOCO3 --> IPRHOCO2H
       IPRHOCO2H + OH --> CH3COCH3 + HO2 + H2O + CO2
       IPRHOCO3H + OH --> IPRHOCO3
               C4PAN5 --> IPRHOCO3 + NO2
          C4PAN5 + OH --> CH3COCH3 + CO + NO2
                MBOOO --> IPRHOCO2H
                MBOOO --> IBUTALOH + H2O2
           MBOOO + CO --> IBUTALOH + CO2
           MBOOO + NO --> IBUTALOH + NO2
          MBOOO + NO2 --> IBUTALOH + NO3
         MALANHY + OH --> MALANHYO2
      MALDIALOOH + OH --> HOCOC4DIAL + OH
      MALDIALOOH + OH --> MALDIALO2
        NC4DCO2H + OH --> MALANHY + NO2
      CO14O3CO2H + OH --> HCOCH2O2 + 2 CO2
         BZFUOOH + OH --> BZFUO2
      HOCOC4DIAL + OH --> CO2C4DIAL + HO2
     MALDIALCO3 + HO2 --> MALDALCO2H + O3
     MALDIALCO3 + HO2 --> MALDALCO3H
     MALDIALCO3 + HO2 --> 0.6 MALANHY + 0.4 GLYOX + 0.4 CO + OH + HO2 + 0.4 CO2 ... etc.
      MALDIALCO3 + NO --> 0.6 MALANHY + 0.4 GLYOX + 0.4 CO + HO2 + NO2 + 0.4 CO2 ... etc.
     MALDIALCO3 + NO2 --> MALDIALPAN
     MALDIALCO3 + NO3 --> 0.6 MALANHY + 0.4 GLYOX + 0.4 CO + HO2 + NO2 + 0.4 CO2 ... etc.
           MALDIALCO3 --> 0.6 MALANHY + 0.4 GLYOX + 0.4 CO + HO2 + 0.4 CO2
        BZFUONE + NO3 --> NBZFUO2
         BZFUONE + O3 --> 0.3125 CO14O3CO2H + 0.1875 CO14O3CHO + 0.1875 H2O2 + 0.5 HCOCH2O2 ... etc.
         BZFUONE + OH --> BZFUO2
        NBZFUOOH + OH --> NBZFUO2
      MALDALCO3H + OH --> MALDIALCO3
       EPXDLCO2H + OH --> C3DIALO2 + CO2
       EPXDLCO3 + HO2 --> C3DIALO2 + OH + CO2
       EPXDLCO3 + HO2 --> EPXDLCO2H + O3
       EPXDLCO3 + HO2 --> EPXDLCO3H
        EPXDLCO3 + NO --> C3DIALO2 + NO2 + CO2
       EPXDLCO3 + NO2 --> EPXDLPAN
       EPXDLCO3 + NO3 --> C3DIALO2 + NO2 + CO2
             EPXDLCO3 --> C3DIALO2 + CO2
      MALNHYOHCO + OH --> 3 CO + HO2 + CO2
        MALDIAL + NO3 --> MALDIALCO3 + HNO3
         MALDIAL + O3 --> 0.1125 HCOCO2H + 0.0675 H2O2 + 1.0675 GLYOX + 1.265 CO ... etc.
         MALDIAL + OH --> 0.17 MALDIALO2 + 0.83 MALDIALCO3
      MALANHYOOH + OH --> MALNHYOHCO + OH
      MALDIALPAN + OH --> GLYOX + 2 CO + NO2
           MALDIALPAN --> MALDIALCO3 + NO2
      MALANHYO2 + HO2 --> MALANHYOOH
      MALANHYO2 + HO2 --> HCOCOHCO3 + OH + CO2
       MALANHYO2 + NO --> HCOCOHCO3 + NO2 + CO2
      MALANHYO2 + NO3 --> HCOCOHCO3 + NO2 + CO2
            MALANHYO2 --> HCOCOHCO3 + CO2
       EPXDLCO3H + OH --> EPXDLCO3
       CO2C4DIAL + OH --> 4 CO + HO2
        NBZFUO2 + HO2 --> NBZFUOOH
        NBZFUO2 + HO2 --> 0.5 NBZFUONE + 0.5 CO14O3CHO + OH + 0.5 HO2 + 0.5 NO2 ... etc.
         NBZFUO2 + NO --> 0.5 NBZFUONE + 0.5 CO14O3CHO + 0.5 HO2 + 1.5 NO2
        NBZFUO2 + NO3 --> 0.5 NBZFUONE + 0.5 CO14O3CHO + 0.5 HO2 + 1.5 NO2
              NBZFUO2 --> 0.5 NBZFUONE + 0.5 CO14O3CHO + 0.5 HO2 + 0.5 NO2
      MALDALCO2H + OH --> 0.6 MALANHY + 0.4 GLYOX + 0.4 CO + HO2 + 0.4 CO2
      EPXC4DIAL + NO3 --> EPXDLCO3 + HNO3
       EPXC4DIAL + OH --> EPXDLCO3
     MECOACETO2 + HO2 --> MECOACEOOH
     MECOACETO2 + HO2 --> CH3CO3 + HCHO + OH + CO2
      MECOACETO2 + NO --> CH3CO3 + HCHO + NO2 + CO2
     MECOACETO2 + NO3 --> CH3CO3 + HCHO + NO2 + CO2
           MECOACETO2 --> CH3CO3 + HCHO + CO2
      CO14O3CHO + NO3 --> HNO3 + HCOCH2O2 + CO + CO2
       CO14O3CHO + OH --> HCOCH2O2 + CO + CO2
        NBZFUONE + OH --> BZFUCO + NO2
         BZFUO2 + HO2 --> BZFUOOH
         BZFUO2 + HO2 --> CO14O3CHO + OH + HO2
          BZFUO2 + NO --> CO14O3CHO + HO2 + NO2
         BZFUO2 + NO3 --> CO14O3CHO + HO2 + NO2
               BZFUO2 --> CO14O3CHO + HO2
          BZFUCO + OH --> CO14O3CHO + HO2
      MALDIALO2 + HO2 --> MALDIALOOH
      MALDIALO2 + HO2 --> 2 GLYOX + OH + HO2
       MALDIALO2 + NO --> 2 GLYOX + HO2 + NO2
      MALDIALO2 + NO3 --> 2 GLYOX + HO2 + NO2
            MALDIALO2 --> 2 GLYOX + HO2
        EPXDLPAN + OH --> C33CO + CO + NO2
             EPXDLPAN --> EPXDLCO3 + NO2
      MECOACEOOH + OH --> MECOACETO2
            C5H8 + O3 --> 0.05408 LCARBON + 0.01518 MACO2H + 0.244 MVK + 0.09482 H2O2 ... etc.
            C5H8 + OH --> 0.63 LISOPAB + 0.3 LISOPCD + 0.07 LISOPEFO2
           C5H8 + NO3 --> NISOPO2
         LISOPAB + O2 --> LISOPACO2
         LISOPAB + O2 --> ISOPBO2
         LISOPCD + O2 --> LDISOPACO2
         LISOPCD + O2 --> ISOPDO2
            LISOPACO2 --> LISOPAB + O2
              ISOPBO2 --> LISOPAB + O2
           LDISOPACO2 --> LISOPCD + O2
              ISOPDO2 --> LISOPCD + O2
            LISOPACO2 --> C1ODC2O2C4OOH
            LISOPACO2 --> LZCODC23DBCOOH + HO2
           LDISOPACO2 --> C1OOHC3O2C4OD
           LDISOPACO2 --> LZCODC23DBCOOH + HO2
            LISOPACO2 --> 0.1 ISOPAOH + 0.9 LISOPACO
      LISOPACO2 + HO2 --> LISOPACOOH
       LISOPACO2 + NO --> LISOPACO + NO2
       LISOPACO2 + NO --> LISOPACNO3
      LISOPACO2 + NO3 --> LISOPACO + NO2
           LDISOPACO2 --> 0.1 ISOPAOH + 0.9 LDISOPACO
     LDISOPACO2 + HO2 --> LISOPACOOH
      LDISOPACO2 + NO --> LDISOPACO + NO2
      LDISOPACO2 + NO --> LISOPACNO3
     LDISOPACO2 + NO3 --> LDISOPACO + NO2
      LISOPACOOH + OH --> LISOPACO2
      LISOPACOOH + OH --> LZCODC23DBCOOH + HO2
      LISOPACOOH + OH --> LHC4ACCHO + OH
      LISOPACOOH + OH --> LIEPOX + OH
         ISOPAOH + OH --> LHC4ACCHO + HO2
      LISOPACNO3 + OH --> LISOPACNO3O2
              ISOPBO2 --> 0.2 ISOPBOH + 0.8 MVK + 0.8 HCHO + 0.8 HO2
        ISOPBO2 + HO2 --> ISOPBOOH
        ISOPBO2 + HO2 --> MVK + HCHO + OH + HO2
         ISOPBO2 + NO --> MVK + HCHO + HO2 + NO2
         ISOPBO2 + NO --> ISOPBNO3
        ISOPBO2 + NO3 --> MVK + 0.25 CH3 + 0.75 HCHO + 0.75 HO2 + NO2
        ISOPBOOH + OH --> LIEPOX + OH
        ISOPBOOH + OH --> ISOPBO2
        ISOPBOOH + OH --> MGLYOX + HOCH2CHO
        ISOPBOOH + O3 --> 0.5668 MACROOH + 0.1368 H2O2 + 0.4332 ACETOL + 0.1591 CH2OO ... etc.
         ISOPBOH + OH --> MVK + 0.25 CH3 + 0.75 HCHO + 0.75 HO2
        ISOPBNO3 + OH --> ISOPBDNO3O2
              ISOPDO2 --> 0.1 ISOPDOH + 0.1 HCOC5 + 0.8 MACR + 0.8 HCHO + 0.8 HO2 ... etc.
        ISOPDO2 + HO2 --> ISOPDOOH
        ISOPDO2 + HO2 --> MACR + HCHO + OH + HO2
         ISOPDO2 + NO --> MACR + HCHO + HO2 + NO2
         ISOPDO2 + NO --> ISOPDNO3
        ISOPDO2 + NO3 --> MACR + HCHO + HO2 + NO2
        ISOPDOOH + OH --> LIEPOX + OH
        ISOPDOOH + OH --> ISOPDO2
        ISOPDOOH + OH --> HCOC5 + OH
        ISOPDOOH + OH --> ACETOL + GLYOX + OH
        ISOPDOOH + O3 --> BIACETOH + 0.1221 CH2OO + 0.2079 CO + 0.67 HCHO + 1.393 OH ... etc.
         ISOPDOH + OH --> HCOC5 + HO2
        ISOPDNO3 + OH --> ISOPBDNO3O2
              NISOPO2 --> 0.8 NC4CHO + 0.2 LISOPACNO3 + 0.6 HO2
        NISOPO2 + HO2 --> NISOPOOH
         NISOPO2 + NO --> NC4CHO + HO2 + NO2
        NISOPO2 + NO3 --> NC4CHO + HO2 + NO2
        NISOPOOH + OH --> NC4CHO + OH
          NC4CHO + OH --> LNISO3
          NC4CHO + O3 --> 0.27 NOA + 0.1458 HCOCO + 0.027 HCOCO2H + 0.0162 H2O2 ... etc.
         NC4CHO + NO3 --> LNISO3 + HNO3
         LNISO3 + HO2 --> LNISOOH
          LNISO3 + NO --> 0.5 HOCHCHO + NOA + 0.5 CO + 0.5 HO2 + NO2 + 0.5 CO2 ... etc.
         LNISO3 + NO3 --> 0.5 HOCHCHO + NOA + 0.5 CO + 0.5 HO2 + NO2 + 0.5 CO2 ... etc.
         LNISOOH + OH --> LNISO3
       LHC4ACCHO + OH --> LC578O2
       LHC4ACCHO + OH --> LHC4ACCO3
       LHC4ACCHO + OH --> C4MDIAL + HO2
       LHC4ACCHO + O3 --> 0.0171875 HOCH2CO2H + 0.0171875 HCOCO2H + 0.075625 H2O2 ... etc.
      LHC4ACCHO + NO3 --> LHC4ACCO3 + HNO3
              LC578O2 --> 0.25 HOCHCHO + 0.25 ACETOL + 0.75 MGLYOX + 0.75 HOCH2CHO ... etc.
        LC578O2 + HO2 --> MGLYOX + HOCH2CHO + OH
        LC578O2 + HO2 --> LC578OOH
         LC578O2 + NO --> 0.25 HOCHCHO + 0.25 ACETOL + 0.75 MGLYOX + 0.75 HOCH2CHO ... etc.
        LC578O2 + NO3 --> 0.25 HOCHCHO + 0.25 ACETOL + 0.75 MGLYOX + 0.75 HOCH2CHO ... etc.
              LC578O2 --> 0.25 ACETOL + 0.75 MGLYOX + HOCH2CHO + OH + HO2
        LC578OOH + OH --> LC578O2
        LC578OOH + OH --> C1ODC2OOHC4OD + HO2
            LHC4ACCO3 --> 0.5 MACRO2 + 0.5 LHMVKABO2 + OH + CO2
            LHC4ACCO3 --> LHC4ACCO2H
      LHC4ACCO3 + HO2 --> 0.5 MACRO2 + 0.5 LHMVKABO2 + 2 OH + CO2
      LHC4ACCO3 + HO2 --> LHC4ACCO3H
      LHC4ACCO3 + HO2 --> LHC4ACCO2H + O3
       LHC4ACCO3 + NO --> 0.5 MACRO2 + 0.5 LHMVKABO2 + NO2 + CO2
      LHC4ACCO3 + NO2 --> LC5PAN1719
      LHC4ACCO3 + NO3 --> 0.5 MACRO2 + 0.5 LHMVKABO2 + NO2 + CO2
      LHC4ACCO2H + OH --> 0.5 MACRO2 + 0.5 LHMVKABO2 + OH + CO2
      LHC4ACCO3H + OH --> LHC4ACCO3
           LC5PAN1719 --> LHC4ACCO3 + NO2
      LC5PAN1719 + OH --> 0.5 MACROH + 0.5 HO12CO3C4 + CO + NO2
           HCOC5 + OH --> C59O2
           HCOC5 + O3 --> BIACETOH + 0.335 H2O2 + 0.1221 CH2OO + 0.2079 CO + 0.67 HCHO ... etc.
                C59O2 --> HOCH2CO + ACETOL
          C59O2 + HO2 --> HOCH2CO + ACETOL + OH
          C59O2 + HO2 --> C59OOH
           C59O2 + NO --> HOCH2CO + ACETOL + NO2
          C59O2 + NO3 --> HOCH2CO + ACETOL + NO2
          C59OOH + OH --> C59O2
          LIEPOX + OH --> DB1O + H2O
              ISOPBO2 --> MVK + HCHO + OH
              ISOPDO2 --> MACR + HCHO + OH
  LZCODC23DBCOOH + OH --> 0.6 C1ODC2O2C4OOH + 0.4 C1OOHC2O2C4OD
  LZCODC23DBCOOH + OH --> 0.4 C1OOHC3O2C4OD + 0.6 C1ODC3O2C4OOH
  LZCODC23DBCOOH + OH --> LZCO3HC23DBCOD
  LZCODC23DBCOOH + OH --> C4MDIAL + OH
  LZCODC23DBCOOH + O3 --> 0.1314 HCOCOCH2OOH + 0.0972 HYPERACET + 0.06286 HCOCO ... etc.
        C1OOHC2O2C4OD --> 0.78 HOCHCHO + 0.78 HYPERACET + 0.22 CO2H3CHO + 0.22 HCHO ... etc.
   C1OOHC2O2C4OD + NO --> 0.78 HOCHCHO + 0.78 HYPERACET + 0.22 CO2H3CHO + 0.22 HCHO ... etc.
  C1OOHC2O2C4OD + HO2 --> C1OOHC2OOHC4OD
  C1OOHC2O2C4OD + HO2 --> 0.78 HOCHCHO + 0.78 HYPERACET + 0.22 CO2H3CHO + 0.22 HCHO ... etc.
        C1OOHC2O2C4OD --> HYPERACET + GLYOX + OH
        C1ODC2O2C4OOH --> C1ODC2OOHC4OD + OH
  C1OOHC2OOHC4OD + OH --> C1ODC2OOHC4OD + OH
  C1OOHC2OOHC4OD + OH --> HYPERACET + 2 CO + OH + 2 HO2
  C1OOHC2OOHC4OD + OH --> C1OOHC2O2C4OD
   C1ODC2OOHC4OD + OH --> CO2H3CHO + CO + OH + H2O
        C1ODC3O2C4OOH --> HOOCH2CHO + MGLYOX + HO2
   C1ODC3O2C4OOH + NO --> HOOCH2CHO + MGLYOX + HO2 + NO2
  C1ODC3O2C4OOH + HO2 --> HOOCH2CO3 + 0.5 MGLYOX + 0.5 CH3CO + 0.5 CO + 0.5 HO2 ... etc.
        C1ODC3O2C4OOH --> HOOCH2CHO + MGLYOX + OH
        C1OOHC3O2C4OD --> 0.625 MGLYOX + 0.375 CH3CO + 2 CO + OH + 1.625 HO2 + 0.375 CO2 ... etc.
            LHC4ACCO3 --> LZCO3HC23DBCOD + HO2
         C4MDIAL + OH --> C1ODC2O2C4OD
         C4MDIAL + OH --> LZCO3C23DBCOD
        C4MDIAL + NO3 --> LZCO3C23DBCOD + HNO3
   C1ODC2O2C4OD + HO2 --> HOCHCHO + MGLYOX + OH
   C1ODC2O2C4OD + HO2 --> C1ODC2OOHC4OD
    C1ODC2O2C4OD + NO --> HOCHCHO + MGLYOX + NO2
         C1ODC2O2C4OD --> HOCHCHO + MGLYOX
   C1ODC2OOHC4OD + OH --> MGLYOX + 2 CO
   C1ODC2OOHC4OD + OH --> MGLYOX + 2 CO + OH
    LISOPACNO3O2 + NO --> 0.49 HO12CO3C4 + 0.045 MVKNO3 + 0.21 NOA + 0.255 NO3CH2CHO ... etc.
         LISOPACNO3O2 --> 0.49 HO12CO3C4 + 0.045 MVKNO3 + 0.21 NOA + 0.255 NO3CH2CHO ... etc.
     ISOPBDNO3O2 + NO --> 0.26 MACRNO3 + 0.14 MVKNO3 + 0.6 ACETOL + 0.6 HOCH2CHO ... etc.
          ISOPBDNO3O2 --> 0.26 MACRNO3 + 0.14 MVKNO3 + 0.6 ACETOL + 0.6 HOCH2CHO ... etc.
      LISOPACNO3 + O3 --> 0.0675 HOCHCHO + 0.135 NOA + 0.0405 CH3OH + 0.0054 HOCH2CO ... etc.
                DB1O2 --> DB1O
          DB1O2 + HO2 --> DB1OOH
          DB1O2 + HO2 --> DB1O + OH
           DB1O2 + NO --> DB1O + NO2
           DB1O2 + NO --> DB1NO3
          DB1O2 + NO3 --> DB1O + NO2
                DB1O2 --> DB2O2 + OH
                 DB1O --> DB2O2
                 DB1O --> 0.5 HMAC + 0.5 HVMK + HCHO + HO2
                DB2O2 --> 0.48 ACETOL + 0.52 MGLYOX + 0.48 GLYOX + 0.52 HOCH2CHO ... etc.
          DB2O2 + HO2 --> DB2OOH
          DB2O2 + HO2 --> 0.48 ACETOL + 0.52 MGLYOX + 0.48 GLYOX + 0.52 HOCH2CHO ... etc.
           DB2O2 + NO --> 0.48 ACETOL + 0.52 MGLYOX + 0.48 GLYOX + 0.52 HOCH2CHO ... etc.
          DB2O2 + NO3 --> 0.48 ACETOL + 0.52 MGLYOX + 0.48 GLYOX + 0.52 HOCH2CHO ... etc.
                DB2O2 --> 0.52 LHMVKABOOH + 0.48 MACROOH + CO + OH
          DB1OOH + OH --> DB1O2
          DB1OOH + OH --> CH3COCHO2CHO + HCOOH + HO2
       DB1OOH + HCOOH --> C1ODC2OOHC4OD + HCOOH
          DB1NO3 + OH --> CH3COCHO2CHO + HCOOH + NO2
          DB2OOH + OH --> DB2O2
      LISOPACOOH + O3 --> 0.0675 HOCHCHO + 0.135 HYPERACET + 0.00405 CH3OH + 0.1825 HOCH2COCH2O2 ...
  LZCO3HC23DBCOD + OH --> 0.38 HCOCO3H + 0.38 MGLYOX + 0.62 CO2H3CHO + 0.62 OH ... etc.
  LZCO3HC23DBCOD + OH --> 0.62 CH3COCO3H + 0.38 MGLYOX + 1.62 CO + 0.38 OH + 2 HO2 ... etc.
            LISOPEFO2 --> LISOPEFO
       LISOPEFO2 + NO --> LISOPEFO + NO2
       LISOPEFO2 + NO --> ISOPDNO3
      LISOPEFO2 + HO2 --> 0.7143 ISOPDOOH + 0.2857 ISOPBOOH
      LISOPEFO2 + HO2 --> LISOPEFO + OH
      LISOPEFO2 + NO3 --> LISOPEFO + NO2
            LISOPEFO2 --> 0.2857 MVK + 0.7143 MACR + HCHO + OH
             LISOPEFO --> 0.2857 MVK + 0.7143 MACR + HCHO + HO2
             LISOPACO --> ME3FURAN + HO2
             LISOPACO --> 0.35 DB1O2 + 0.65 LHC4ACCHO + 0.65 HO2
            LDISOPACO --> ME3FURAN + HO2
            LDISOPACO --> 0.35 DB1O2 + 0.65 LHC4ACCHO + 0.65 HO2
        ME3FURAN + OH --> LME3FURANO2
       ME3FURAN + NO3 --> LME3FURANO2 + NO2
          LME3FURANO2 --> C4MDIAL + HO2
     LME3FURANO2 + NO --> C4MDIAL + HO2 + NO2
    LME3FURANO2 + HO2 --> C4MDIAL + HO2
        LZCO3C23DBCOD --> 0.38 EZCHOCCH3CHO2 + 0.62 EZCH3CO2CHCHO + CO2
  LZCO3C23DBCOD + HO2 --> 0.38 EZCHOCCH3CHO2 + 0.62 EZCH3CO2CHCHO + OH + CO2
  LZCO3C23DBCOD + HO2 --> LZCO3HC23DBCOD
   LZCO3C23DBCOD + NO --> 0.38 EZCHOCCH3CHO2 + 0.62 EZCH3CO2CHCHO + NO2 + CO2 ... etc.
  LZCO3C23DBCOD + NO2 --> LZCPANC23DBCOD
  LZCO3C23DBCOD + NO3 --> 0.38 EZCHOCCH3CHO2 + 0.62 EZCH3CO2CHCHO + NO2 + CO2 ... etc.
       LZCPANC23DBCOD --> LZCO3C23DBCOD + NO2
  LZCPANC23DBCOD + OH --> 0.38 EZCHOCCH3CHO2 + 0.62 EZCH3CO2CHCHO + NO2 + CO2 ... etc.
               C511O2 --> HCOCH2CHO + CH3CO
          C511O2 + NO --> HCOCH2CHO + CH3CO + NO2
         C511O2 + HO2 --> C511OOH
         C511O2 + HO2 --> HCOCH2CHO + CH3CO + OH
         C511OOH + OH --> C511O2
       CO23C4CHO + OH --> CO23C4CO3
      CO23C4CHO + NO3 --> CO23C4CO3 + HNO3
            CO23C4CO3 --> BIACETO2 + CO2
       CO23C4CO3 + NO --> BIACETO2 + NO2 + CO2
      CO23C4CO3 + NO2 --> C5PAN9
      CO23C4CO3 + HO2 --> CO23C4CO3H
      CO23C4CO3 + HO2 --> BIACETO2 + OH + CO2
               C5PAN9 --> CO23C4CO3 + NO2
          C5PAN9 + OH --> CO23C3CHO + CO + NO2
               C512O2 --> C513O2
         C512O2 + HO2 --> C512OOH
          C512O2 + NO --> C513O2 + NO2
         C512OOH + OH --> CO13C4CHO + OH
               C513O2 --> HOC2H4CO3 + GLYOX
          C513O2 + NO --> HOC2H4CO3 + GLYOX + NO2
         C513O2 + HO2 --> C513OOH
         C513O2 + HO2 --> HOC2H4CO3 + GLYOX + OH
       CO13C4CHO + OH --> CHOC3COCO3
      CO13C4CHO + NO3 --> CHOC3COCO3 + HNO3
         C513OOH + OH --> C513CO + OH
           CHOC3COCO3 --> CHOC3COO2 + CO2
     CHOC3COCO3 + HO2 --> CHOC3COOOH
     CHOC3COCO3 + NO2 --> CHOC3COPAN
      CHOC3COCO3 + NO --> CHOC3COO2 + NO2 + CO2
          C513CO + OH --> HOC2H4CO3 + 2 CO
         C514O2 + HO2 --> C514OOH
          C514O2 + NO --> CO13C4CHO + HO2 + NO2
          C514O2 + NO --> C514NO3
         C514O2 + NO3 --> CO13C4CHO + HO2 + NO2
               C514O2 --> CO13C4CHO + HO2
         C514OOH + OH --> CO13C4CHO + OH
         C514NO3 + OH --> CO13C4CHO + NO2
      CHOC3COOOH + OH --> CHOC3COCO3
           CHOC3COPAN --> CHOC3COCO3 + NO2
      CHOC3COPAN + OH --> C4CODIAL + CO + NO2
             MBO + OH --> LMBOABO2
             MBO + O3 --> 0.16 CH3COCH3 + 0.84 MBOOO + 0.16 CO + HCHO + 0.16 OH ... etc.
             MBO + O3 --> 0.37 HOCH2OOH + IBUTALOH + 0.63 CO + 0.16 OH + 0.16 HO2 ... etc.
            MBO + NO3 --> LNMBOABO2
       LMBOABO2 + HO2 --> LMBOABOOH
        LMBOABO2 + NO --> LMBOABNO3
        LMBOABO2 + NO --> CH3COCH3 + HOCH2CHO + HO2 + NO2
        LMBOABO2 + NO --> IBUTALOH + HCHO + HO2 + NO2
             LMBOABO2 --> CH3COCH3 + HOCH2CHO + HO2
             LMBOABO2 --> IBUTALOH + HCHO + HO2
       LMBOABOOH + OH --> MBOACO
       LMBOABOOH + OH --> LMBOABO2
       LMBOABNO3 + OH --> MBOACO + NO2
          MBOACO + OH --> MBOCOCO + HO2
         MBOCOCO + OH --> IPRHOCO3 + CO
      LNMBOABO2 + HO2 --> LNMBOABOOH
       LNMBOABO2 + NO --> 0.35 IBUTALOH + 0.65 NO3CH2CHO + 0.65 CH3COCH3 + 0.35 HCHO ... etc.
      LNMBOABO2 + NO3 --> 0.35 IBUTALOH + 0.65 NO3CH2CHO + 0.65 CH3COCH3 + 0.35 HCHO ... etc.
            LNMBOABO2 --> 0.35 IBUTALOH + 0.65 NO3CH2CHO + 0.65 CH3COCH3 + 0.35 HCHO ... etc.
      LNMBOABOOH + OH --> 0.35 NMBOBCO + 0.65 C4MCONO3OH
      LNMBOABOOH + OH --> LNMBOABO2
         NMBOBCO + OH --> NC4OHCO3
       NC4OHCO3 + HO2 --> IBUTALOH + OH + NO2 + CO2
       NC4OHCO3 + HO2 --> NC4OHCO3H
        NC4OHCO3 + NO --> IBUTALOH + 2 NO2 + CO2
       NC4OHCO3 + NO2 --> NC4OHCPAN
       NC4OHCO3 + NO3 --> IBUTALOH + 2 NO2 + CO2
             NC4OHCO3 --> IBUTALOH + NO2 + CO2
       NC4OHCO3H + OH --> NC4OHCO3
       NC4OHCPAN + OH --> IBUTALOH + CO + 2 NO2
            NC4OHCPAN --> NC4OHCO3 + NO2
      C4MCONO3OH + OH --> CH3COCH3 + HCHO + NO2 + CO2
       NC4MDCO2H + OH --> MMALANHY + NO2
          C54CO + NO3 --> CH3CO3 + HNO3 + 3 CO
           C54CO + OH --> CH3CO3 + 3 CO
        NTLFUO2 + HO2 --> NTLFUOOH
        NTLFUO2 + HO2 --> ACCOMECHO + OH + NO2
         NTLFUO2 + NO --> ACCOMECHO + 2 NO2
        NTLFUO2 + NO3 --> ACCOMECHO + 2 NO2
              NTLFUO2 --> ACCOMECHO + NO2
      C5134CO2OH + OH --> C54CO + HO2
       C5COO2NO2 + OH --> MGLYOX + 2 CO + NO2
            C5COO2NO2 --> C5CO14O2 + NO2
       C5DIALOOH + OH --> C5DIALCO + OH
     C4CO2DBCO3 + HO2 --> C4CO2DCO3H
     C4CO2DBCO3 + HO2 --> C33CO + CO + OH + HO2 + CO2
      C4CO2DBCO3 + NO --> C33CO + CO + HO2 + NO2 + CO2
     C4CO2DBCO3 + NO2 --> C4CO2DBPAN
     C4CO2DBCO3 + NO3 --> C33CO + CO + HO2 + NO2 + CO2
           C4CO2DBCO3 --> C33CO + CO + HO2 + CO2
        MMALANHY + OH --> MMALANHYO2
     MMALANHYO2 + HO2 --> MMALNHYOOH
     MMALANHYO2 + HO2 --> CO2H3CO3 + OH + CO2
      MMALANHYO2 + NO --> CO2H3CO3 + NO2 + CO2
     MMALANHYO2 + NO3 --> CO2H3CO3 + NO2 + CO2
           MMALANHYO2 --> CO2H3CO3 + CO2
      C4CO2DBPAN + OH --> C33CO + CO + NO2 + CO2
           C4CO2DBPAN --> C4CO2DBCO3 + NO2
       C5CO14O2 + HO2 --> 0.83 MALANHY + 0.17 MGLYOX + 0.83 CH3 + 0.17 CO + OH ... etc.
       C5CO14O2 + HO2 --> C5CO14OH + O3
       C5CO14O2 + HO2 --> C5CO14OOH
        C5CO14O2 + NO --> 0.83 MALANHY + 0.17 MGLYOX + 0.83 CH3 + 0.17 CO + 0.17 HO2 ... etc.
       C5CO14O2 + NO2 --> C5COO2NO2
       C5CO14O2 + NO3 --> 0.83 MALANHY + 0.17 MGLYOX + 0.83 CH3 + 0.17 CO + 0.17 HO2 ... etc.
             C5CO14O2 --> 0.83 MALANHY + 0.17 MGLYOX + 0.83 CH3 + 0.17 CO + 0.17 HO2 ... etc.
        C5CO14OH + OH --> 0.83 MALANHY + 0.17 MGLYOX + 0.83 CH3 + 0.17 CO + 0.17 HO2 ... etc.
       C5DICARB + NO3 --> C5CO14O2 + HNO3
        C5DICARB + O3 --> 0.0563 HCOCO2H + 0.348 CH3CO3 + 0.676 H2O2 + 0.0563 CH3COCO2H ... etc.
        C5DICARB + OH --> 0.52 C5DICARBO2 + 0.48 C5CO14O2
      MC3ODBCO2H + OH --> 0.65 MMALANHY + 0.35 GLYOX + 0.35 CH3 + 0.35 CO + 0.65 HO2 ... etc.
        TLFUONE + NO3 --> NTLFUO2
         TLFUONE + O3 --> 0.3125 C24O3CCO2H + 0.1875 ACCOMECHO + 0.5 MECOACETO2 ... etc.
         TLFUONE + OH --> TLFUO2
      ACCOMECO3 + HO2 --> ACCOMECO3H
      ACCOMECO3 + HO2 --> MECOACETO2 + OH + CO2
       ACCOMECO3 + NO --> MECOACETO2 + NO2 + CO2
      ACCOMECO3 + NO2 --> ACCOMEPAN
      ACCOMECO3 + NO3 --> MECOACETO2 + NO2 + CO2
            ACCOMECO3 --> MECOACETO2 + CO2
      C4CO2DCO3H + OH --> C4CO2DBCO3
      ACCOMECHO + NO3 --> ACCOMECO3 + HNO3
       ACCOMECHO + OH --> ACCOMECO3
      MMALNHYOOH + OH --> MMALANHYO2
      C5DICAROOH + OH --> C5134CO2OH + OH
      C5DICAROOH + OH --> C5DICARBO2
      C24O3CCO2H + OH --> MECOACETO2 + CO2
        NTLFUOOH + OH --> NTLFUO2
       ACCOMEPAN + OH --> METACETHO + 2 CO + NO2
            ACCOMEPAN --> ACCOMECO3 + NO2
         TLFUO2 + HO2 --> TLFUOOH
         TLFUO2 + HO2 --> ACCOMECHO + OH + HO2
          TLFUO2 + NO --> ACCOMECHO + HO2 + NO2
         TLFUO2 + NO3 --> ACCOMECHO + HO2 + NO2
               TLFUO2 --> ACCOMECHO + HO2
       C5CO14OOH + OH --> C5CO14O2
         TLFUOOH + OH --> TLFUO2
      ACCOMECO3H + OH --> ACCOMECO3
       C5DIALO2 + HO2 --> C5DIALOOH
       C5DIALO2 + HO2 --> MALDIAL + CO + OH + HO2
        C5DIALO2 + NO --> MALDIAL + CO + HO2 + NO2
       C5DIALO2 + NO3 --> MALDIAL + CO + HO2 + NO2
             C5DIALO2 --> MALDIAL + CO + HO2
     C5DICARBO2 + HO2 --> C5DICAROOH
     C5DICARBO2 + HO2 --> MGLYOX + GLYOX + OH + HO2
      C5DICARBO2 + NO --> MGLYOX + GLYOX + HO2 + NO2
     C5DICARBO2 + NO3 --> MGLYOX + GLYOX + HO2 + NO2
           C5DICARBO2 --> MGLYOX + GLYOX + HO2
      CO235C6O2 + HO2 --> CO235C6OOH
      CO235C6O2 + HO2 --> CO23C4CO3 + HCHO + OH
       CO235C6O2 + NO --> CO23C4CO3 + HCHO + NO2
            CO235C6O2 --> CO23C4CO3 + HCHO
      CO235C6OOH + OH --> CO235C6O2
               C614O2 --> CO23C4CHO + HCHO + HO2
          C614O2 + NO --> CO23C4CHO + HCHO + HO2 + NO2
          C614O2 + NO --> C614NO3
         C614O2 + HO2 --> C614OOH
         C614O2 + HO2 --> CO23C4CHO + HCHO + OH + HO2
         C614NO3 + OH --> C614CO + NO2
         C614OOH + OH --> C614CO + OH
          C614CO + OH --> CO235C5CHO + HO2
      CO235C5CHO + OH --> CO23C4CO3 + CO
     CO235C5CHO + NO3 --> CO23C4CO3 + HNO3 + CO
         PHENOOH + OH --> PHENO2
         C6CO4DB + OH --> C33CO + 3 CO + HO2
      C5CO2DCO3H + OH --> C5CO2DBCO3
      NDNPHENOOH + OH --> NDNPHENO2
      C615CO2O2 + HO2 --> C615CO2OOH
      C615CO2O2 + HO2 --> C5DICARB + CO + OH + HO2
       C615CO2O2 + NO --> C5DICARB + CO + HO2 + NO2
      C615CO2O2 + NO3 --> C5DICARB + CO + HO2 + NO2
            C615CO2O2 --> C5DICARB + CO + HO2
       BZEMUCPAN + OH --> MALDIAL + CO + NO2 + CO2
            BZEMUCPAN --> BZEMUCCO3 + NO2
      BZBIPERNO3 + OH --> BZOBIPEROH + NO2
      HOC6H4NO2 + NO3 --> NPHEN1O + HNO3
       HOC6H4NO2 + OH --> NPHEN1O
      NDNPHENO2 + HO2 --> NDNPHENOOH
      NDNPHENO2 + HO2 --> NC4DCO2H + HNO3 + 2 CO + OH + NO2
       NDNPHENO2 + NO --> NC4DCO2H + HNO3 + 2 CO + 2 NO2
      NDNPHENO2 + NO3 --> NC4DCO2H + HNO3 + 2 CO + 2 NO2
            NDNPHENO2 --> NC4DCO2H + HNO3 + 2 CO + NO2
          PBZQCO + OH --> C5CO2OHCO3
       CATECHOL + NO3 --> CATEC1O + HNO3
        CATECHOL + O3 --> MALDALCO2H + HCOCO2H + OH + HO2
        CATECHOL + OH --> CATEC1O
      C5COOHCO3H + OH --> C5CO2OHCO3
      NCATECHOL + NO3 --> NNCATECO2
       NCATECHOL + OH --> NCATECO2
     C5CO2OHCO3 + HO2 --> C5COOHCO3H
     C5CO2OHCO3 + HO2 --> HOCOC4DIAL + CO + OH + HO2 + CO2
      C5CO2OHCO3 + NO --> HOCOC4DIAL + CO + HO2 + NO2 + CO2
     C5CO2OHCO3 + NO2 --> C5CO2OHPAN
     C5CO2OHCO3 + NO3 --> HOCOC4DIAL + CO + HO2 + NO2 + CO2
           C5CO2OHCO3 --> HOCOC4DIAL + CO + HO2 + CO2
      BZEPOXMUC + NO3 --> BZEMUCCO3 + HNO3
       BZEPOXMUC + O3 --> EPXC4DIAL + 0.1125 HCOCO2H + 0.0675 H2O2 + 0.0675 GLYOX ... etc.
       BZEPOXMUC + OH --> 0.31 BZEMUCCO3 + 0.69 BZEMUCO2
       NCATECO2 + HO2 --> NCATECOOH
       NCATECO2 + HO2 --> NC4DCO2H + HCOCO2H + OH + HO2
        NCATECO2 + NO --> NC4DCO2H + HCOCO2H + HO2 + NO2
       NCATECO2 + NO3 --> NC4DCO2H + HCOCO2H + HO2 + NO2
             NCATECO2 --> NC4DCO2H + HCOCO2H + HO2
       NPHEN1OOH + OH --> NPHEN1O2
        NPHENO2 + HO2 --> NPHENOOH
        NPHENO2 + HO2 --> MALDALCO2H + GLYOX + OH + NO2
         NPHENO2 + NO --> MALDALCO2H + GLYOX + 2 NO2
        NPHENO2 + NO3 --> MALDALCO2H + GLYOX + 2 NO2
              NPHENO2 --> MALDALCO2H + GLYOX + NO2
         BENZENE + OH --> 0.352 BZBIPERO2 + 0.53 PHENOL + 0.118 BZEPOXMUC + 0.648 HO2 ... etc.
      C5CO2OHPAN + OH --> HOCOC4DIAL + 2 CO + NO2
           C5CO2OHPAN --> C5CO2OHCO3 + NO2
        CATEC1O + NO2 --> NCATECHOL
         CATEC1O + O3 --> CATEC1O2
        BZEMUCCO + OH --> EPXDLCO3 + GLYOX
      NNCATECO2 + HO2 --> NNCATECOOH
      NNCATECO2 + HO2 --> NC4DCO2H + HCOCO2H + OH + NO2
       NNCATECO2 + NO --> NC4DCO2H + HCOCO2H + 2 NO2
      NNCATECO2 + NO3 --> NC4DCO2H + HCOCO2H + 2 NO2
            NNCATECO2 --> NC4DCO2H + HCOCO2H + NO2
      BZEMUCCO2H + OH --> C5DIALO2 + CO2
      NNCATECOOH + OH --> NNCATECO2
        NPHEN1O + NO2 --> DNPHEN
         NPHEN1O + O3 --> NPHEN1O2
         DNPHEN + NO3 --> NDNPHENO2
          DNPHEN + OH --> DNPHENO2
         PHENOL + NO3 --> 0.258 NPHENO2 + 0.742 C6H5O + 0.742 HNO3
          PHENOL + OH --> 0.8 CATECHOL + 0.14 PHENO2 + 0.06 C6H5O + 0.8 HO2
        PBZQONE + NO3 --> NBZQO2
         PBZQONE + OH --> PBZQO2
         PHENO2 + HO2 --> PHENOOH
         PHENO2 + HO2 --> 0.29 PBZQONE + 0.71 MALDALCO2H + 0.71 GLYOX + OH + HO2 ... etc.
          PHENO2 + NO --> 0.29 PBZQONE + 0.71 MALDALCO2H + 0.71 GLYOX + HO2 + NO2 ... etc.
         PHENO2 + NO3 --> 0.29 PBZQONE + 0.71 MALDALCO2H + 0.71 GLYOX + HO2 + NO2 ... etc.
               PHENO2 --> 0.29 PBZQONE + 0.71 MALDALCO2H + 0.71 GLYOX + HO2
      C615CO2OOH + OH --> C6125CO + OH
     C5CO2DBCO3 + HO2 --> C5CO2DCO3H
     C5CO2DBCO3 + HO2 --> C33CO + CH3CO + OH + CO2
      C5CO2DBCO3 + NO --> C33CO + CH3CO + NO2 + CO2
     C5CO2DBCO3 + NO2 --> C5CO2DBPAN
     C5CO2DBCO3 + NO3 --> C33CO + CH3CO + NO2 + CO2
           C5CO2DBCO3 --> C33CO + CH3CO + CO2
       NPHEN1O2 + HO2 --> NPHEN1OOH
        NPHEN1O2 + NO --> NPHEN1O + NO2
       NPHEN1O2 + NO2 --> NPHEN1O + NO3
       NPHEN1O2 + NO3 --> NPHEN1O + NO2
             NPHEN1O2 --> NPHEN1O
        NPHENOOH + OH --> NPHENO2
          C6H5O + NO2 --> HOC6H4NO2
           C6H5O + O3 --> C6H5O2
       NCATECOOH + OH --> NCATECO2
         PBZQOOH + OH --> PBZQCO + OH
         PBZQO2 + HO2 --> PBZQOOH
         PBZQO2 + HO2 --> C5CO2OHCO3 + OH
          PBZQO2 + NO --> C5CO2OHCO3 + NO2
         PBZQO2 + NO3 --> C5CO2OHCO3 + NO2
               PBZQO2 --> C5CO2OHCO3
      BZOBIPEROH + OH --> MALDIALCO3 + GLYOX
       DNPHENO2 + HO2 --> DNPHENOOH
       DNPHENO2 + HO2 --> NC4DCO2H + HCOCO2H + OH + NO2
        DNPHENO2 + NO --> NC4DCO2H + HCOCO2H + 2 NO2
       DNPHENO2 + NO3 --> NC4DCO2H + HCOCO2H + 2 NO2
             DNPHENO2 --> NC4DCO2H + HCOCO2H + NO2
      BZBIPEROOH + OH --> BZOBIPEROH + OH
       BZEMUCO2 + HO2 --> BZEMUCOOH
       BZEMUCO2 + HO2 --> 0.5 C32OH13CO + 0.5 EPXC4DIAL + 0.5 C3DIALO2 + 0.5 GLYOX ... etc.
        BZEMUCO2 + NO --> BZEMUCNO3
        BZEMUCO2 + NO --> 0.5 C32OH13CO + 0.5 EPXC4DIAL + 0.5 C3DIALO2 + 0.5 GLYOX ... etc.
       BZEMUCO2 + NO3 --> 0.5 C32OH13CO + 0.5 EPXC4DIAL + 0.5 C3DIALO2 + 0.5 GLYOX ... etc.
             BZEMUCO2 --> 0.5 C32OH13CO + 0.5 EPXC4DIAL + 0.5 C3DIALO2 + 0.5 GLYOX ... etc.
      C5CO2DBPAN + OH --> C33CO + CH3CHO + NO2 + CO2
           C5CO2DBPAN --> C5CO2DBCO3 + NO2
         NBZQOOH + OH --> NBZQO2
       CATEC1OOH + OH --> CATEC1O2
         C6125CO + OH --> C5CO14O2 + CO
         NBZQO2 + HO2 --> NBZQOOH
         NBZQO2 + HO2 --> C6CO4DB + OH + NO2
          NBZQO2 + NO --> C6CO4DB + 2 NO2
         NBZQO2 + NO3 --> C6CO4DB + 2 NO2
               NBZQO2 --> C6CO4DB + NO2
       DNPHENOOH + OH --> DNPHENO2
       CATEC1O2 + HO2 --> CATEC1OOH
        CATEC1O2 + NO --> CATEC1O + NO2
       CATEC1O2 + NO2 --> CATEC1O + NO3
       CATEC1O2 + NO3 --> CATEC1O + NO2
             CATEC1O2 --> CATEC1O
      BZEMUCCO3H + OH --> BZEMUCCO3
         C6H5OOH + OH --> C6H5O2
       BZEMUCOOH + OH --> BZEMUCCO + OH
      BZEMUCCO3 + HO2 --> BZEMUCCO2H + O3
      BZEMUCCO3 + HO2 --> BZEMUCCO3H
      BZEMUCCO3 + HO2 --> C5DIALO2 + OH + CO2
       BZEMUCCO3 + NO --> C5DIALO2 + NO2 + CO2
      BZEMUCCO3 + NO2 --> BZEMUCPAN
      BZEMUCCO3 + NO3 --> C5DIALO2 + NO2 + CO2
            BZEMUCCO3 --> C5DIALO2 + CO2
         C6H5O2 + HO2 --> C6H5OOH
          C6H5O2 + NO --> C6H5O + NO2
         C6H5O2 + NO2 --> C6H5O + NO3
         C6H5O2 + NO3 --> C6H5O + NO2
               C6H5O2 --> C6H5O
       BZEMUCNO3 + OH --> BZEMUCCO + NO2
      BZBIPERO2 + HO2 --> BZBIPEROOH
      BZBIPERO2 + HO2 --> BZFUONE + GLYOX + OH + HO2
       BZBIPERO2 + NO --> BZBIPERNO3
       BZBIPERO2 + NO --> BZFUONE + GLYOX + HO2 + NO2
      BZBIPERO2 + NO3 --> BZFUONE + GLYOX + HO2 + NO2
            BZBIPERO2 --> BZFUONE + GLYOX + HO2
     CO235C6CHO + NO3 --> CO235C6CO3 + HNO3
      CO235C6CHO + OH --> CO235C6CO3
     CO235C6CO3 + HO2 --> C235C6CO3H
     CO235C6CO3 + HO2 --> CO235C6O2 + OH + CO2
      CO235C6CO3 + NO --> CO235C6O2 + NO2 + CO2
     CO235C6CO3 + NO2 --> C7PAN3
           CO235C6CO3 --> CO235C6O2 + CO2
      C235C6CO3H + OH --> CO235C6CO3
          C7PAN3 + OH --> CO235C5CHO + CO + NO2
               C7PAN3 --> CO235C6CO3 + NO2
         C716O2 + HO2 --> C716OOH
         C716O2 + HO2 --> CO13C4CHO + CH3CO + OH
          C716O2 + NO --> CO13C4CHO + CH3CO + NO2
               C716O2 --> CO13C4CHO + CH3CO
         C716OOH + OH --> CO235C6CHO + OH
         C721O2 + HO2 --> C721OOH
          C721O2 + NO --> C722O2 + NO2
               C721O2 --> C722O2
         C721OOH + OH --> C721O2
         C722O2 + HO2 --> C722OOH
          C722O2 + NO --> C44O2 + CH3COCH3 + NO2
               C722O2 --> C44O2 + CH3COCH3
         C722OOH + OH --> C722O2
             ROO6R3O2 --> ROO6R5O2
        ROO6R3O2 + NO --> ROO6R3O + NO2
       ROO6R3O2 + HO2 --> 7 LCARBON
             ROO6R3O2 --> ROO6R3O
              ROO6R3O --> 7 LCARBON + HO2
             ROO6R5O2 --> 7 LCARBON + OH
         TOLUENE + OH --> 0.18 CRESOL + 0.07 C6H5CH2O2 + 0.1 TLEPOXMUC + 0.65 TLBIPERO2 ... etc.
      C6H5CH2O2 + HO2 --> C6H5CH2OOH
       C6H5CH2O2 + NO --> C6H5CH2NO3
       C6H5CH2O2 + NO --> BENZAL + HO2 + NO2
      C6H5CH2O2 + NO3 --> BENZAL + HO2 + NO2
            C6H5CH2O2 --> BENZAL + HO2
         CRESOL + NO3 --> 0.391 TOL1O + 0.103 CRESO2 + 0.506 NCRESO2 + 0.494 HNO3 ... etc.
          CRESOL + OH --> 0.073 TOL1O + 0.2 CRESO2 + 0.727 MCATECHOL + 0.727 HO2 ... etc.
      TLBIPERO2 + HO2 --> TLBIPEROOH
      TLBIPERO2 + HO2 --> 0.2 BZFUONE + 0.2 TLFUONE + 0.2 MALDIAL + 0.2 C5DICARB ... etc.
       TLBIPERO2 + NO --> 0.2 BZFUONE + 0.2 TLFUONE + 0.2 MALDIAL + 0.2 C5DICARB ... etc.
       TLBIPERO2 + NO --> TLBIPERNO3
      TLBIPERO2 + NO3 --> 0.2 BZFUONE + 0.2 TLFUONE + 0.2 MALDIAL + 0.2 C5DICARB ... etc.
            TLBIPERO2 --> 0.2 BZFUONE + 0.2 TLFUONE + 0.2 MALDIAL + 0.2 C5DICARB ... etc.
      TLEPOXMUC + NO3 --> TLEMUCCO3 + HNO3
       TLEPOXMUC + O3 --> EPXC4DIAL + 0.0675 H2O2 + 0.1125 CH3COCO2H + 0.0675 MGLYOX ... etc.
       TLEPOXMUC + OH --> 0.31 TLEMUCCO3 + 0.69 TLEMUCO2
      C6H5CH2OOH + OH --> BENZAL + OH
      C6H5CH2NO3 + OH --> BENZAL + NO2
         BENZAL + NO3 --> C6H5CO3 + HNO3
          BENZAL + OH --> C6H5CO3
         CRESO2 + HO2 --> CRESOOH
         CRESO2 + HO2 --> 0.32 PTLQONE + 0.68 C5CO14OH + 0.68 GLYOX + OH + HO2 ... etc.
          CRESO2 + NO --> 0.32 PTLQONE + 0.68 C5CO14OH + 0.68 GLYOX + HO2 + NO2 ... etc.
         CRESO2 + NO3 --> 0.32 PTLQONE + 0.68 C5CO14OH + 0.68 GLYOX + HO2 + NO2 ... etc.
               CRESO2 --> 0.32 PTLQONE + 0.68 C5CO14OH + 0.68 GLYOX + HO2
        NCRESO2 + HO2 --> NCRESOOH
        NCRESO2 + HO2 --> C5CO14OH + GLYOX + OH + NO2
         NCRESO2 + NO --> C5CO14OH + GLYOX + 2 NO2
        NCRESO2 + NO3 --> C5CO14OH + GLYOX + 2 NO2
              NCRESO2 --> C5CO14OH + GLYOX + NO2
          TOL1O + NO2 --> TOL1OHNO2
           TOL1O + O3 --> OXYL1O2
      MCATECHOL + NO3 --> MCATEC1O + HNO3
       MCATECHOL + O3 --> MC3ODBCO2H + HCOCO2H + OH + HO2
       MCATECHOL + OH --> MCATEC1O
      TLBIPEROOH + OH --> TLOBIPEROH + OH
      TLBIPERNO3 + OH --> TLOBIPEROH + NO2
      TLOBIPEROH + OH --> C5CO14O2 + GLYOX
      TLEMUCCO3 + HO2 --> C615CO2O2 + OH + CO2
      TLEMUCCO3 + HO2 --> TLEMUCCO2H + O3
      TLEMUCCO3 + HO2 --> TLEMUCCO3H
       TLEMUCCO3 + NO --> C615CO2O2 + NO2 + CO2
      TLEMUCCO3 + NO2 --> TLEMUCPAN
      TLEMUCCO3 + NO3 --> C615CO2O2 + NO2 + CO2
            TLEMUCCO3 --> C615CO2O2 + CO2
       TLEMUCO2 + HO2 --> TLEMUCOOH
       TLEMUCO2 + HO2 --> 0.5 EPXC4DIAL + 0.5 C3DIALO2 + 0.5 MGLYOX + 0.5 CO2H3CHO ... etc.
        TLEMUCO2 + NO --> TLEMUCNO3
        TLEMUCO2 + NO --> 0.5 EPXC4DIAL + 0.5 C3DIALO2 + 0.5 MGLYOX + 0.5 CO2H3CHO ... etc.
       TLEMUCO2 + NO3 --> 0.5 EPXC4DIAL + 0.5 C3DIALO2 + 0.5 MGLYOX + 0.5 CO2H3CHO ... etc.
             TLEMUCO2 --> 0.5 EPXC4DIAL + 0.5 C3DIALO2 + 0.5 MGLYOX + 0.5 CO2H3CHO ... etc.
        C6H5CO3 + HO2 --> C6H5CO3H
        C6H5CO3 + HO2 --> C6H5O2 + OH + CO2
        C6H5CO3 + HO2 --> PHCOOH + O3
         C6H5CO3 + NO --> C6H5O2 + NO2 + CO2
        C6H5CO3 + NO2 --> PBZN
        C6H5CO3 + NO3 --> C6H5O2 + NO2 + CO2
              C6H5CO3 --> C6H5O2 + CO2
         CRESOOH + OH --> CRESO2
        NCRESOOH + OH --> NCRESO2
      TOL1OHNO2 + NO3 --> NCRES1O + HNO3
       TOL1OHNO2 + OH --> NCRES1O
        OXYL1O2 + HO2 --> OXYL1OOH
         OXYL1O2 + NO --> TOL1O + NO2
        OXYL1O2 + NO2 --> TOL1O + NO3
        OXYL1O2 + NO3 --> TOL1O + NO2
              OXYL1O2 --> TOL1O
       MCATEC1O + NO2 --> MNCATECH
        MCATEC1O + O3 --> MCATEC1O2
      TLEMUCCO2H + OH --> C615CO2O2 + CO2
      TLEMUCCO3H + OH --> TLEMUCCO3
       TLEMUCPAN + OH --> C5DICARB + CO + NO2 + CO2
            TLEMUCPAN --> TLEMUCCO3 + NO2
       TLEMUCOOH + OH --> TLEMUCCO + OH
       TLEMUCNO3 + OH --> TLEMUCCO + NO2
        TLEMUCCO + OH --> EPXC4DIAL + CH3CO + CO
        C6H5CO3H + OH --> C6H5CO3
          PHCOOH + OH --> C6H5O2 + CO2
            PBZN + OH --> C6H5OOH + CO + NO2
                 PBZN --> C6H5CO3 + NO2
        PTLQONE + NO3 --> NPTLQO2
         PTLQONE + OH --> PTLQO2
        NCRES1O + NO2 --> DNCRES
         NCRES1O + O3 --> NCRES1O2
        OXYL1OOH + OH --> OXYL1O2
       MNCATECH + NO3 --> MNNCATECO2
        MNCATECH + OH --> MNCATECO2
      MCATEC1O2 + HO2 --> MCATEC1OOH
       MCATEC1O2 + NO --> MCATEC1O + NO2
      MCATEC1O2 + NO2 --> MCATEC1O + NO3
      MCATEC1O2 + NO3 --> MCATEC1O + NO2
            MCATEC1O2 --> MCATEC1O
        NPTLQO2 + HO2 --> NPTLQOOH
        NPTLQO2 + HO2 --> C7CO4DB + OH + NO2
         NPTLQO2 + NO --> C7CO4DB + 2 NO2
        NPTLQO2 + NO3 --> C7CO4DB + 2 NO2
              NPTLQO2 --> C7CO4DB + NO2
         PTLQO2 + HO2 --> PTLQOOH
         PTLQO2 + HO2 --> C6CO2OHCO3 + OH
          PTLQO2 + NO --> C6CO2OHCO3 + NO2
         PTLQO2 + NO3 --> C6CO2OHCO3 + NO2
               PTLQO2 --> C6CO2OHCO3
         DNCRES + NO3 --> NDNCRESO2
          DNCRES + OH --> DNCRESO2
       NCRES1O2 + HO2 --> NCRES1OOH
        NCRES1O2 + NO --> NCRES1O + NO2
       NCRES1O2 + NO2 --> NCRES1O + NO3
       NCRES1O2 + NO3 --> NCRES1O + NO2
             NCRES1O2 --> NCRES1O
     MNNCATECO2 + HO2 --> MNNCATCOOH
     MNNCATECO2 + HO2 --> NC4MDCO2H + HCOCO2H + OH + NO2
      MNNCATECO2 + NO --> NC4MDCO2H + HCOCO2H + 2 NO2
     MNNCATECO2 + NO3 --> NC4MDCO2H + HCOCO2H + 2 NO2
           MNNCATECO2 --> NC4MDCO2H + HCOCO2H + NO2
      MNCATECO2 + HO2 --> MNCATECOOH
      MNCATECO2 + HO2 --> NC4MDCO2H + HCOCO2H + OH + HO2
       MNCATECO2 + NO --> NC4MDCO2H + HCOCO2H + HO2 + NO2
      MNCATECO2 + NO3 --> NC4MDCO2H + HCOCO2H + HO2 + NO2
            MNCATECO2 --> NC4MDCO2H + HCOCO2H + HO2
      MCATEC1OOH + OH --> MCATEC1O2
        NPTLQOOH + OH --> NPTLQO2
         PTLQOOH + OH --> PTLQCO + OH
          PTLQCO + OH --> C6CO2OHCO3
      NDNCRESO2 + HO2 --> NDNCRESOOH
      NDNCRESO2 + HO2 --> NC4MDCO2H + HNO3 + 2 CO + OH + NO2
       NDNCRESO2 + NO --> NC4MDCO2H + HNO3 + 2 CO + 2 NO2
      NDNCRESO2 + NO3 --> NC4MDCO2H + HNO3 + 2 CO + 2 NO2
            NDNCRESO2 --> NC4MDCO2H + HNO3 + 2 CO + NO2
       DNCRESO2 + HO2 --> DNCRESOOH
       DNCRESO2 + HO2 --> NC4MDCO2H + HCOCO2H + OH + NO2
        DNCRESO2 + NO --> NC4MDCO2H + HCOCO2H + 2 NO2
       DNCRESO2 + NO3 --> NC4MDCO2H + HCOCO2H + 2 NO2
             DNCRESO2 --> NC4MDCO2H + HCOCO2H + NO2
       NCRES1OOH + OH --> NCRES1O2
      MNNCATCOOH + OH --> MNNCATECO2
      MNCATECOOH + OH --> MNCATECO2
         C7CO4DB + OH --> C33CO + CH3CO + 2 CO
     C6CO2OHCO3 + HO2 --> C5134CO2OH + CO + OH + HO2 + CO2
     C6CO2OHCO3 + HO2 --> C6COOHCO3H
      C6CO2OHCO3 + NO --> C5134CO2OH + CO + HO2 + NO2 + CO2
     C6CO2OHCO3 + NO2 --> C6CO2OHPAN
     C6CO2OHCO3 + NO3 --> C5134CO2OH + CO + HO2 + NO2 + CO2
           C6CO2OHCO3 --> C5134CO2OH + CO + HO2 + CO2
      NDNCRESOOH + OH --> NDNCRESO2
       DNCRESOOH + OH --> DNCRESO2
      C6COOHCO3H + OH --> C6CO2OHCO3
      C6CO2OHPAN + OH --> C5134CO2OH + 2 CO + NO2
           C6CO2OHPAN --> C6CO2OHCO3 + NO2
                C85O2 --> C86O2
          C85O2 + HO2 --> C85OOH
           C85O2 + NO --> C86O2 + NO2
          C85OOH + OH --> C85O2
                C86O2 --> C511O2 + CH3COCH3
           C86O2 + NO --> C511O2 + CH3COCH3 + NO2
          C86O2 + HO2 --> C86OOH
          C86OOH + OH --> C86O2
               C811O2 --> C812O2
         C811O2 + HO2 --> 8 LCARBON
          C811O2 + NO --> C812O2 + NO2
               C812O2 --> C813O2
          C812O2 + NO --> C813O2 + NO2
         C812O2 + HO2 --> C812OOH
         C812OOH + OH --> C812O2
               C813O2 --> C512O2 + CH3COCH3
          C813O2 + NO --> C512O2 + CH3COCH3 + NO2
         C813O2 + HO2 --> C813OOH
         C813OOH + OH --> C813O2
        C721CHO + NO3 --> C721CO3 + HNO3
         C721CHO + OH --> C721CO3
        C721CO3 + HO2 --> C721CO3H
        C721CO3 + HO2 --> C721O2 + OH + CO2
        C721CO3 + HO2 --> NORPINIC + O3
         C721CO3 + NO --> C721O2 + NO2 + CO2
        C721CO3 + NO2 --> C721PAN
        C721CO3 + NO3 --> C721O2 + NO2 + CO2
              C721CO3 --> C721O2 + CO2
              C721CO3 --> NORPINIC
        C721CO3H + OH --> C721CO3
        NORPINIC + OH --> C721O2 + CO2
         C721PAN + OH --> C721OOH + CO + NO2
              C721PAN --> C721CO3 + NO2
            C8BC + OH --> C8BCO2
         C8BCO2 + HO2 --> C8BCOOH
          C8BCO2 + NO --> C89O2 + NO2
          C8BCO2 + NO --> C8BCNO3
               C8BCO2 --> C89O2
         C8BCOOH + OH --> C8BCCO + OH
         C8BCNO3 + OH --> C8BCCO + NO2
          C8BCCO + OH --> C89O2
          C89O2 + HO2 --> C89OOH
           C89O2 + NO --> C810O2 + NO2
           C89O2 + NO --> C89NO3
          C89O2 + NO3 --> C810O2 + NO2
                C89O2 --> C810O2
          C89OOH + OH --> C89O2
          C89NO3 + OH --> CH3COCH3 + CO13C4CHO + NO2
         C810O2 + HO2 --> C810OOH
          C810O2 + NO --> C514O2 + CH3COCH3 + NO2
          C810O2 + NO --> C810NO3
         C810O2 + NO3 --> C514O2 + CH3COCH3 + NO2
               C810O2 --> C514O2 + CH3COCH3
         C810OOH + OH --> C810O2
         C810NO3 + OH --> CH3COCH3 + CO13C4CHO + NO2
            LXYL + OH --> LCARBON + TLEPOXMUC + HO2
            LXYL + OH --> LCARBON + C6H5CH2O2
            LXYL + OH --> LCARBON + CRESOL
            LXYL + OH --> LCARBON + TLBIPERO2 + HO2
           LXYL + NO3 --> LCARBON + C6H5CH2O2 + HNO3
           EBENZ + OH --> LCARBON + 0.18 CRESOL + 0.07 C6H5CH2O2 + 0.1 TLEPOXMUC ... etc.
          EBENZ + NO3 --> LCARBON + C6H5CH2O2 + HNO3
        STYRENE + NO3 --> NSTYRENO2
         STYRENE + O3 --> 0.075 PHCOOH + 0.1 BENZENE + 0.545 BENZAL + 0.28 C6H5O2 ... etc.
         STYRENE + OH --> STYRENO2
      NSTYRENO2 + HO2 --> NSTYRENOOH
       NSTYRENO2 + NO --> BENZAL + HCHO + 2 NO2
      NSTYRENO2 + NO3 --> BENZAL + HCHO + 2 NO2
            NSTYRENO2 --> BENZAL + HCHO + NO2
      NSTYRENOOH + OH --> NSTYRENO2
       STYRENO2 + HO2 --> STYRENOOH
       STYRENO2 + HO2 --> BENZAL + HCHO + OH + HO2
        STYRENO2 + NO --> BENZAL + HCHO + HO2 + NO2
       STYRENO2 + NO3 --> BENZAL + HCHO + HO2 + NO2
             STYRENO2 --> BENZAL + HCHO + HO2
       STYRENOOH + OH --> STYRENO2
                C96O2 --> C97O2
          C96O2 + HO2 --> C96OOH
           C96O2 + NO --> C97O2 + NO2
           C96O2 + NO --> C96NO3
          C96NO3 + OH --> NORPINAL + NO2
          C96OOH + OH --> C96O2
          C96OOH + OH --> NORPINAL + OH
                C97O2 --> C98O2
           C97O2 + NO --> C98O2 + NO2
          C97O2 + HO2 --> C97OOH
          C97O2 + HO2 --> C98O2 + OH
          C97OOH + OH --> C97O2
                C98O2 --> C614O2 + CH3COCH3
           C98O2 + NO --> C614O2 + CH3COCH3 + NO2
           C98O2 + NO --> LNITROGEN + 9 LCARBON
          C98O2 + HO2 --> C98OOH
          C98OOH + OH --> C98O2
        NORPINAL + OH --> C85CO3
       NORPINAL + NO3 --> C85CO3 + HNO3
               C85CO3 --> C85O2 + CO2
          C85CO3 + NO --> C85O2 + NO2 + CO2
         C85CO3 + NO2 --> C9PAN2
         C85CO3 + HO2 --> C85CO3H
         C85CO3 + HO2 --> C85O2 + OH + CO2
               C9PAN2 --> C85CO3 + NO2
          C9PAN2 + OH --> C85OOH + CO + NO2
         C85CO3H + OH --> C85CO3
               C89CO3 --> 0.2 C89O2 + 0.8 C811CO3 + 0.2 CO2
               C89CO3 --> C89CO2H
         C89CO3 + HO2 --> C89CO3H
         C89CO3 + HO2 --> C89CO2H + O3
         C89CO3 + HO2 --> 0.2 C89O2 + 0.8 C811CO3 + OH + 0.2 CO2
         C89CO3 + NO2 --> C89PAN
          C89CO3 + NO --> 0.2 C89O2 + 0.8 C811CO3 + NO2 + 0.2 CO2
         C89CO2H + OH --> 0.2 C89O2 + 0.8 C811CO3 + 0.2 CO2
         C89CO3H + OH --> C89CO3
               C89PAN --> C89CO3 + NO2
          C89PAN + OH --> CH3COCH3 + CO13C4CHO + CO + NO2
              C811CO3 --> C811O2 + CO2
              C811CO3 --> PINIC
        C811CO3 + HO2 --> C811CO3H
        C811CO3 + HO2 --> PINIC + O3
        C811CO3 + HO2 --> C811O2 + OH + CO2
         C811CO3 + NO --> C811O2 + NO2 + CO2
        C811CO3 + NO2 --> C811PAN
           PINIC + OH --> C811O2 + CO2
        NOPINONE + OH --> NOPINDO2
       NOPINDO2 + HO2 --> NOPINDOOH
       NOPINDO2 + HO2 --> C89CO3 + OH
        NOPINDO2 + NO --> C89CO3 + NO2
             NOPINDO2 --> C89CO3
            NOPINDOOH --> NOPINDCO
        NOPINDCO + OH --> C89CO3
              NOPINOO --> NOPINONE + H2O2
         NOPINOO + CO --> NOPINONE + CO2
         NOPINOO + NO --> NOPINONE + NO2
        NOPINOO + NO2 --> NOPINONE + NO3
      NORPINENOL + OH --> C86O2 + HCOOH + OH
   NORPINENOL + HCOOH --> NORPINAL + HCOOH
     NORPINAL + HCOOH --> NORPINENOL + HCOOH
        C811CO3H + OH --> C811CO3
              C811PAN --> C811CO3 + NO2
         C811PAN + OH --> C721CHO + CO + NO2
            LTMB + OH --> 2 LCARBON + TLEPOXMUC + HO2
            LTMB + OH --> 2 LCARBON + C6H5CH2O2
            LTMB + OH --> 2 LCARBON + CRESOL
            LTMB + OH --> 2 LCARBON + TLBIPERO2 + HO2
           LTMB + NO3 --> 2 LCARBON + C6H5CH2O2 + HNO3
         APINENE + OH --> 0.15 MENTHEN6ONE + 0.75 LAPINABO2 + 0.1 ROO6R1O2 + 0.15 HO2 ... etc.
       LAPINABO2 + NO --> PINAL + HO2 + NO2
       LAPINABO2 + NO --> LAPINABNO3
      LAPINABO2 + HO2 --> LAPINABOOH
      LAPINABO2 + HO2 --> PINAL + OH + HO2
            LAPINABO2 --> PINAL + HO2
      LAPINABOOH + OH --> 0.35 LAPINABO2 + 0.65 C96CO3
      LAPINABNO3 + OH --> 0.65 C96CO3 + 0.35 PINAL + NO2
     MENTHEN6ONE + OH --> OHMENTHEN6ONEO2
 OHMENTHEN6ONEO2 + NO --> OH2MENTHEN6ONE + HO2 + NO2
OHMENTHEN6ONEO2 + HO2 --> OH2MENTHEN6ONE
      OHMENTHEN6ONEO2 --> OH2MENTHEN6ONE + HO2
  OH2MENTHEN6ONE + OH --> 1 LCARBON
           PINAL + OH --> 0.228 PINALO2 + 0.772 C96CO3
          PINAL + NO3 --> C96CO3 + HNO3
               C96CO3 --> C96O2 + CO2
               C96CO3 --> PINONIC
         C96CO3 + HO2 --> PERPINONIC
         C96CO3 + HO2 --> PINONIC + O3
         C96CO3 + HO2 --> C96O2 + OH + CO2
         C96CO3 + NO2 --> C10PAN2
          C96CO3 + NO --> C96O2 + NO2 + CO2
         C96CO3 + NO3 --> C96O2 + NO2 + CO2
              C10PAN2 --> C96CO3 + NO2
         C10PAN2 + OH --> NORPINAL + CO + NO2
         PINONIC + OH --> C96O2 + CO2
      PERPINONIC + OH --> C96CO3
        PINALO2 + HO2 --> PINALOOH
         PINALO2 + NO --> C106O2 + NO2
         PINALO2 + NO --> PINALNO3
              PINALO2 --> C106O2
        PINALOOH + OH --> PINALO2
        PINALNO3 + OH --> CO235C6CHO + CH3COCH3 + NO2
         C106O2 + HO2 --> C106OOH
          C106O2 + NO --> C716O2 + CH3COCH3 + NO2
          C106O2 + NO --> C106NO3
               C106O2 --> C716O2 + CH3COCH3
         C106OOH + OH --> C106O2
         C106NO3 + OH --> CO235C6CHO + CH3COCH3 + NO2
         APINENE + O3 --> 0.08 PINONIC + 0.44 C109O2 + 0.06 APINAOO + 0.09 APINBOO ... etc.
              APINAOO --> H2O2 + PINAL
         APINAOO + CO --> PINAL + CO2
         APINAOO + NO --> PINAL + NO2
        APINAOO + NO2 --> PINAL + NO3
              APINBOO --> PINONIC
              APINBOO --> H2O2 + PINAL
         APINBOO + CO --> PINAL + CO2
         APINBOO + NO --> PINAL + NO2
        APINBOO + NO2 --> PINAL + NO3
               C109O2 --> C89CO3 + HCHO
          C109O2 + NO --> C89CO3 + HCHO + NO2
         C109O2 + HO2 --> C109OOH
         C109O2 + HO2 --> C89CO3 + HCHO + OH
         C109OOH + OH --> C109CO + OH
          C109CO + OH --> C89CO3 + CO
        APINENE + NO3 --> LNAPINABO2
           LNAPINABO2 --> PINAL + NO2
      LNAPINABO2 + NO --> PINAL + 2 NO2
     LNAPINABO2 + HO2 --> LNAPINABOOH
     LNAPINABO2 + NO3 --> PINAL + 2 NO2
     LNAPINABOOH + OH --> LNAPINABO2
         BPINENE + OH --> BPINAO2
         BPINENE + OH --> ROO6R1O2
        BPINAO2 + HO2 --> BPINAOOH
        BPINAO2 + HO2 --> NOPINONE + HCHO + OH + HO2
         BPINAO2 + NO --> NOPINONE + HCHO + HO2 + NO2
         BPINAO2 + NO --> BPINANO3
              BPINAO2 --> NOPINONE + HCHO + HO2
        BPINAOOH + OH --> BPINAO2
        BPINANO3 + OH --> NOPINONE + HCHO + NO2
        ROO6R1O2 + NO --> ROO6R3O2 + CH3COCH3 + NO2
        ROO6R1O2 + NO --> ROO6R1NO3
       ROO6R1O2 + HO2 --> 1 LCARBON
             ROO6R1O2 --> ROO6R3O2 + CH3COCH3
         RO6R1O2 + NO --> RO6R3O2 + NO2
         RO6R1O2 + NO --> RO6R1NO3
        RO6R1O2 + HO2 --> 1 LCARBON
              RO6R1O2 --> RO6R3O2
         RO6R3O2 + NO --> 9 LCARBON + HCHO + HO2 + NO2
         RO6R3O2 + NO --> LNITROGEN + 1 LCARBON
        RO6R3O2 + HO2 --> 1 LCARBON
              RO6R3O2 --> 9 LCARBON + HCHO + HO2
         BPINENE + O3 --> NOPINONE + 0.37 CH2OO + 0.63 CO + 0.16 OH + 0.16 HO2 ... etc.
         BPINENE + O3 --> NOPINOO + CO2
         BPINENE + O3 --> NOPINDO2 + OH + CO2
         BPINENE + O3 --> C8BC + 2 CO2
        BPINENE + NO3 --> LNBPINABO2
     LNBPINABO2 + HO2 --> LNBPINABOOH
      LNBPINABO2 + NO --> NOPINONE + HCHO + 2 NO2
     LNBPINABO2 + NO3 --> NOPINONE + HCHO + 2 NO2
           LNBPINABO2 --> NOPINONE + HCHO + NO2
           LNBPINABO2 --> BPINANO3
     LNBPINABOOH + OH --> LNBPINABO2
       ROO6R1NO3 + OH --> ROO6R3O2 + CH3COCH3 + NO2
        RO6R1NO3 + OH --> 9 LCARBON + HCHO + HO2 + NO2
         PINENOL + OH --> NORPINAL + HCOOH + OH
      PINENOL + HCOOH --> PINAL + HCOOH
        PINAL + HCOOH --> PINENOL + HCOOH
          CARENE + OH --> LAPINABO2
          CARENE + OH --> MENTHEN6ONE + HO2
          CARENE + OH --> ROO6R1O2
          CARENE + O3 --> APINBOO
          CARENE + O3 --> PINONIC
          CARENE + O3 --> NORPINAL + CO + OH + HO2
          CARENE + O3 --> APINAOO
          CARENE + O3 --> C109O2 + OH
         CARENE + NO3 --> LNAPINABO2
        SABINENE + OH --> BPINAO2
        SABINENE + OH --> ROO6R1O2
        SABINENE + O3 --> NOPINONE + 0.37 HOCH2OOH + 0.63 CO + 0.16 OH + 0.16 HO2 ... etc.
        SABINENE + O3 --> NOPINOO + CO2
        SABINENE + O3 --> NOPINDO2 + OH + CO2
        SABINENE + O3 --> C8BC + 2 CO2
       SABINENE + NO3 --> LNBPINABO2
        CAMPHENE + OH --> BPINAO2
        CAMPHENE + OH --> ROO6R1O2
        CAMPHENE + O3 --> NOPINONE + 0.37 HOCH2OOH + 0.63 CO + 0.16 OH + 0.16 HO2 ... etc.
        CAMPHENE + O3 --> NOPINOO + CO2
        CAMPHENE + O3 --> NOPINDO2 + OH + CO2
        CAMPHENE + O3 --> C8BC + 2 CO2
       CAMPHENE + NO3 --> LNBPINABO2
          LHAROM + OH --> 4 LCARBON + 0.04 CRESOL + 0.03 C6H5CH2O2 + 0.14 TLEPOXMUC ... etc.
         LHAROM + NO3 --> 4 LCARBON + C6H5CH2O2 + HNO3
              O3 + Cl --> ClO + O2
            ClO + O3P --> Cl + O2
                2 ClO --> Cl2 + O2
                2 ClO --> 2 Cl + O2
                2 ClO --> OClO + Cl
                2 ClO --> Cl2O2
                Cl2O2 --> 2 ClO
              H2 + Cl --> H + HCl
             Cl + HO2 --> HCl + O2
             Cl + HO2 --> ClO + OH
            H2O2 + Cl --> HO2 + HCl
             ClO + OH --> 0.94 Cl + 0.94 HO2 + 0.06 HCl + 0.06 O2
            ClO + HO2 --> HOCl + O2
             OH + HCl --> Cl + H2O
            HOCl + OH --> ClO + H2O
             ClO + NO --> Cl + NO2
            ClO + NO2 --> ClNO3
                ClNO3 --> ClO + NO2
          ClNO3 + O3P --> ClO + NO3
           ClNO3 + Cl --> Cl2 + NO3
             CH4 + Cl --> CH3 + HCl
            Cl + HCHO --> CO + HO2 + HCl
          CH3OOH + Cl --> HCHO + OH + HCl
          ClO + CH3O2 --> Cl + HCHO + HO2
           CCl4 + O1D --> LCARBON + ClO + 3 Cl
          CH3Cl + O1D --> 0.9 LCARBON + 0.09 LCHLORINE + 0.1 CH3Cl + 0.09 H + 0.46 ClO ... etc.
           CH3Cl + OH --> LCARBON + Cl + H2O
        CH3CCl3 + O1D --> 2 LCARBON + 3 Cl + OH
         CH3CCl3 + OH --> 2 LCARBON + 3 Cl + H2O
            C2H4 + Cl --> HOCH2CH2O2 + HCl
          CH3CHO + Cl --> CH3CO + HCl
            C2H2 + Cl --> LCARBON + CH3 + HCl
            C2H6 + Cl --> C2H5O2 + HCl
          CH3NO3 + Cl --> HCHO + HCl + NO2
          CH3ONO + Cl --> NO + HCHO + HCl
           Cl + CH3O2 --> 0.5 CH3O + 0.5 ClO + 0.5 CH2OO + 0.5 HCl
           CH3CN + Cl --> NCCH2O2 + HCl
         CF2Cl2 + O1D --> LCARBON + 2 LFLUORINE + ClO + Cl
          CFCl3 + O1D --> LCARBON + LFLUORINE + ClO + 2 Cl
              O3 + Br --> BrO + O2
            O3P + BrO --> Br + O2
                2 BrO --> 2 Br + O2
                2 BrO --> Br2 + O2
             Br + HO2 --> HBr + O2
            BrO + HO2 --> HOBr + O2
             HBr + OH --> Br + H2O
           HOBr + O3P --> BrO + OH
             Br2 + OH --> HOBr + Br
           BrNO3 + Br --> Br2 + NO3
             NO + BrO --> Br + NO2
            BrO + NO2 --> BrNO3
                BrNO3 --> BrO + NO2
            Br + HCHO --> HBr + CO + HO2
          CH3OOH + Br --> HBr + CH3O2
          CH3O2 + BrO --> HOBr + CH2OO
           CH3Br + OH --> LCARBON + Br + H2O
            C2H4 + Br --> HOCH2CH2O2 + HBr
          CH3CHO + Br --> CH3CO + HBr
            C2H2 + Br --> LCARBON + HBr + CH3O2
           CHBr3 + OH --> LCARBON + 3 Br + H2O
          CH2Br2 + OH --> LCARBON + 2 Br + H2O
            BrCl + Br --> Br2 + Cl
             Cl2 + Br --> BrCl + Cl
             Br2 + Cl --> BrCl + Br
            ClO + BrO --> OClO + Br
            ClO + BrO --> Cl + Br + O2
            ClO + BrO --> BrCl + O2
            BrCl + Cl --> Cl2 + Br
         CHCl2Br + OH --> LCARBON + 2 LCHLORINE + Br + H2O
         CHClBr2 + OH --> LCARBON + LCHLORINE + 2 Br + H2O
         CH2ClBr + OH --> LCARBON + LCHLORINE + Br + H2O
             SO2 + OH --> H2SO4 + HO2
             DMS + OH --> CH3SO2 + HCHO
             DMS + OH --> DMSO + HO2
            DMS + NO3 --> CH3SO2 + HNO3 + HCHO
            DMSO + OH --> 0.4 CH3SO3H + 0.6 SO2 + 0.6 CH3 + HCHO + 0.4 HO2
               CH3SO2 --> SO2 + CH3
          CH3SO2 + O3 --> CH3SO3
         CH3SO3 + HO2 --> CH3SO3H
          SO2 + CH2OO --> H2SO4 + HCHO
        NOPINOO + SO2 --> H2SO4 + NOPINONE
        APINAOO + SO2 --> H2SO4 + PINAL
        APINBOO + SO2 --> H2SO4 + PINAL
          MBOOO + SO2 --> H2SO4 + IBUTALOH
             DMS + Cl --> CH3SO2 + HCHO + HCl
             DMS + Br --> CH3SO2 + HBr + HCHO
            DMS + BrO --> DMSO + Br
                   O2 --> 2 O3P
                   O3 --> O1D + O2
                   O3 --> O3P + O2
                  H2O --> H + OH
                 H2O2 --> 2 OH
                  N2O --> O1D + N2
                  NO2 --> O3P + NO
                   NO --> N + O3P
                  NO3 --> O3P + NO2
                  NO3 --> NO + O2
                 N2O5 --> NO3 + NO2
                 HONO --> NO + OH
                 HNO3 --> OH + NO2
                 HNO4 --> 0.333 NO3 + 0.333 OH + 0.667 HO2 + 0.667 NO2
               CH3OOH --> CH3O + OH
                 HCHO --> H2 + CO
                 HCHO --> H + CO + HO2
                  CO2 --> CO + O3P
                  CH4 --> 0.1 LCARBON + 0.6912 H2 + 0.42 H + 0.42 CH3 + 0.1824 CO ... etc.
               CH3ONO --> CH3O + NO
               CH3NO3 --> CH3O + NO2
             CH3O2NO2 --> 0.333 CH3O + 0.667 CH3O2 + 0.333 NO3 + 0.667 NO2
             HOCH2OOH --> HCOOH + OH + HO2
                CH3O2 --> HCHO + OH
                HCOOH --> CO + OH + HO2
           HOCH2O2NO2 --> 0.667 HOCH2O2 + 0.333 HCOOH + 0.333 NO3 + 0.333 HO2 ... etc.
              C2H5OOH --> CH3CHO + OH + HO2
               CH3CHO --> CH3 + CO + HO2
               CH3CHO --> CH2CHOH
              CH3CO3H --> CH3 + OH + CO2
                  PAN --> 0.7 CH3CO + 0.3 CH3 + 0.3 NO3 + 0.7 NO2 + 0.3 CO2
             HOCH2CHO --> CO + HCHO + 2 HO2
             HOCH2CHO --> HCOCH2O2 + OH
             HOCH2CHO --> CH3OH + CO
            HOCH2CO3H --> HCHO + OH + HO2 + CO2
                 PHAN --> 0.7 HOCH2CO + 0.3 NO3 + 0.3 HCHO + 0.3 HO2 + 0.7 NO2 ... etc.
                GLYOX --> 2 CO + 2 HO2
              HCOCO2H --> CO + 2 HO2 + CO2
              HCOCO3H --> CO + OH + HO2 + CO2
             HYETHO2H --> HOCH2CH2O + OH
             ETHOHNO3 --> 2 HCHO + HO2 + NO2
           HOOCH2CO3H --> HCHO + 2 OH + CO2
           HOOCH2CO2H --> HCHO + OH + HO2 + CO2
                CH2CO --> 0.8 H + 0.1 HCOOH + 1.34 CO + 0.16 O3P + 0.16 HCHO + 0.34 OH ... etc.
           CH3CHOHOOH --> CH3 + HCOOH + OH
            NO3CH2CHO --> CO + HCHO + HO2 + NO2
            HOOCH2CHO --> CO + HCHO + OH + HO2
              C2H5NO3 --> CH3CHO + HO2 + NO2
            NO3CH2PAN --> 0.7 NO3CH2CO3 + 0.3 NO3 + 0.3 HCHO + NO2 + 0.3 CO2
            C2H5O2NO2 --> 0.667 C2H5O2 + 0.333 CH3CHO + 0.333 NO3 + 0.333 HO2 ... etc.
             IC3H7OOH --> CH3COCH3 + OH + HO2
             CH3COCH3 --> CH3CO + CH3
               ACETOL --> 0.5 HOCH2CO + 0.5 CH3CO + 0.5 CH3 + 0.5 HCHO + 0.5 HO2 ... etc.
               MGLYOX --> CH3CO + CO + HO2
            HYPERACET --> CH3CO + HCHO + OH
        HOCH2COCH2OOH --> HOCH2CO + HCHO + OH
             IC3H7NO3 --> CH3COCH3 + HO2 + NO2
                  NOA --> CH3CO + HCHO + NO2
            HYPROPO2H --> CH3CHO + HCHO + OH + HO2
            PR2O2HNO3 --> NOA + OH + HO2
           HOCH2COCHO --> HOCH2CO + CO + HO2
           ALCOCH2OOH --> HCOCO + HCHO + OH
           ALCOCH2OOH --> HOOCH2CO3 + CO + HO2
            HCOCH2CHO --> HCOCH2O2 + CO + HO2
           HCOCH2CO2H --> HCOCH2O2 + HO2 + CO2
           HOC2H4CO3H --> HOCH2CH2O2 + OH + CO2
                C33CO --> HCOCO + CO + HO2
            CH3COCO2H --> 0.07 CH3CO2H + 0.16 CH2CHOH + 0.43 CH3CO + 0.32 CH3CHO ... etc.
            CH3COCO3H --> CH3CO + OH + CO2
              CH3CHCO --> C2H4 + CO
            PROPOLNO3 --> HOCH2CHO + HCHO + HO2 + NO2
        CH3COCH2O2NO2 --> CH3CO + NO3 + HCHO
             NC3H7OOH --> C2H5CHO + OH + HO2
             NC3H7NO3 --> C2H5CHO + HO2 + NO2
              C2H5CHO --> C2H5O2 + CO + HO2
              C2H5CHO --> PROPENOL
                  PPN --> 0.7 C2H5CO3 + 0.3 C2H5O2 + 0.3 NO3 + 0.7 NO2 + 0.3 CO2 ... etc.
           PERPROACID --> C2H5O2 + OH + CO2
          HCOCOCH2OOH --> HOOCH2CO3 + CO + HO2
          HCOCOCH2OOH --> HCOCO + HCHO + OH
           HCOCH2CO3H --> HCOCH2O2 + OH + CO2
            C3DIALOOH --> GLYOX + CO + OH + HO2
            C32OH13CO --> GLYOX + CO + 2 HO2
           HCOCOHCO3H --> GLYOX + OH + HO2 + CO2
             LC4H9OOH --> C3H7CHO + OH + HO2
             LC4H9OOH --> 0.636 MEK + 0.364 C2H5O2 + 0.364 CH3CHO + OH + 0.636 HO2 ... etc.
                  MVK --> 0.5 C3H6 + 0.5 CH3CO + CO + 0.5 HCHO + 0.5 HO2
                  MEK --> C2H5O2 + CH3CO
              LMEKOOH --> 0.38 HOCH2CH2O2 + 0.62 CH3CO + 0.62 CH3CHO + 0.38 HCHO ... etc.
               BIACET --> 2 CH3CO
             LC4H9NO3 --> C3H7CHO + HO2 + NO2
             LC4H9NO3 --> MEK + HO2 + NO2
                 MPAN --> 0.3 MACO2 + 0.7 MACO3 + 0.3 NO3 + 0.7 NO2
            CO2H3CO3H --> MGLYOX + OH + HO2 + CO2
            CO2H3CO3H --> HCOCO3H + CH3CO + HO2
                 MACR --> 0.5 MACO3 + 0.5 CH3CO + 0.5 CO + 0.5 HCHO + HO2
              MACROOH --> MACRO + OH
               MACROH --> ACETOL + CO + 2 HO2
               MACO3H --> MACO2 + OH
           LHMVKABOOH --> 0.12 MGLYOX + 0.88 CH3CO + 0.88 HOCH2CHO + 0.12 HCHO ... etc.
             CO2H3CHO --> MGLYOX + CO + 2 HO2
            HO12CO3C4 --> CH3CO + HOCH2CHO + HO2
             BIACETOH --> HOCH2CO + CH3CO
            HCOCCH3CO --> 0.5 CH3CHCO + 0.5 CH3CHO + 1.5 CO + 0.5 OH
            CH3COCHCO --> 0.1848 H2O2 + 0.0192 CH3COCO2H + 0.2208 MGLYOX + 0.56 CH3CO ... etc.
            CH3COCHCO --> CH3CHCO + CO
            CO23C3CHO --> CH3CO + 2 CO + HO2
            CO23C3CHO --> HCOCO + CH3CO
          CH3COCOCO2H --> CH3CO + CO + HO2 + CO2
            BIACETOOH --> CH3CO + CO + HCHO + OH
            BIACETOOH --> HCOCO + CH3CO
               C44OOH --> HCOCH2CHO + OH + HO2 + CO2
            C413COOOH --> HCOCH2CO3 + HCHO + OH
             C4CODIAL --> CHOCOCH2O2 + CO + HO2
             C4CODIAL --> HCOCH2CO3 + CO + HO2
           C312COCO3H --> CHOCOCH2O2 + OH + CO2
              LMEKNO3 --> 0.38 HOCH2CH2O2 + 0.62 CH3CO + 0.62 CH3CHO + 0.38 HCHO ... etc.
               MVKNO3 --> CH3CO + HOCH2CHO + NO2
              MACRNO3 --> ACETOL + CO + HO2 + NO2
             TC4H9NO3 --> CH3COCH3 + CH3 + NO2
             TC4H9OOH --> CH3COCH3 + CH3 + OH
           IBUTOLBNO3 --> CH3COCH3 + HCHO + HO2 + NO2
           IBUTOLBOOH --> CH3COCH3 + HCHO + OH + HO2
           LBUT1ENOOH --> C2H5CHO + HCHO + OH + HO2
           LBUT1ENNO3 --> C2H5CHO + HCHO + HO2 + NO2
            BUT2OLOOH --> 2 CH3CHO + OH + HO2
            BUT2OLNO3 --> 2 CH3CHO + HO2 + NO2
              BUT2OLO --> HOCH2CO + CH3CO
              C3H7CHO --> NC3H7O2 + CO + HO2
              C3H7CHO --> CH2CHOH + C2H4
               IPRCHO --> IC3H7O2 + CO + HO2
             IC4H9NO3 --> IPRCHO + NO2
             IC4H9OOH --> IPRCHO + OH + HO2
           PERIBUACID --> IC3H7O2 + OH + CO2
                 PIPN --> 0.3 IC3H7O2 + 0.7 IPRCO3 + 0.3 NO3 + 0.7 NO2 + 0.3 CO2 ... etc.
                 HVMK --> MGLYOX + CO + 2 OH
                 HMAC --> HCOCCH3CO + 2 OH
             CO2C3CHO --> CH3COCH2O2 + CO + HO2
             CO2C3CHO --> HVMK
             IBUTDIAL --> CH3CHO + CO + HO2 + H2O + CO2
             IBUTDIAL --> HMAC
             IBUTALOH --> CH3COCH3 + CO + 2 HO2
            IPRHOCO3H --> CH3COCH3 + OH + HO2 + CO2
           MALDIALOOH --> C32OH13CO + CO + OH + HO2
           MALDIALOOH --> 2 GLYOX + OH + HO2
              BZFUOOH --> CO14O3CHO + OH + HO2
           HOCOC4DIAL --> HCOCOHCO3 + CO + HO2
             NBZFUOOH --> 0.5 NBZFUONE + 0.5 CO14O3CHO + OH + 0.5 HO2 + 0.5 NO2 ... etc.
           MALDALCO3H --> HCOCO3H + 2 CO + 2 HO2
           MALDALCO3H --> 0.6 MALANHY + 0.4 GLYOX + 0.4 CO + OH + HO2 + 0.4 CO2 ... etc.
            EPXDLCO2H --> C3DIALO2 + HO2 + CO2
              MALDIAL --> 0.4 BZFUONE + 0.6 MALDIALCO3 + 0.6 HO2
           MALANHYOOH --> HCOCOHCO3 + OH + CO2
            EPXDLCO3H --> C3DIALO2 + OH + CO2
            CO2C4DIAL --> 4 CO + 2 HO2
           MALDALCO2H --> HCOCO2H + 2 CO + 2 HO2
            EPXC4DIAL --> C3DIALO2 + CO + HO2
            CO14O3CHO --> HCOCH2O2 + CO + HO2 + CO2
           MECOACEOOH --> CH3CO + HCHO + OH + CO2
           LISOPACOOH --> LISOPACO + OH
           LISOPACNO3 --> LISOPACO + NO2
             ISOPBOOH --> MVK + HCHO + OH + HO2
             ISOPBNO3 --> MVK + HCHO + HO2 + NO2
             ISOPDOOH --> MACR + HCHO + OH + HO2
             ISOPDNO3 --> MACR + HCHO + HO2 + NO2
             NISOPOOH --> NC4CHO + OH + HO2
               NC4CHO --> LHC4ACCO3 + NO2
              LNISOOH --> 0.5 HOCHCHO + NOA + 0.5 CO + OH + 0.5 HO2 + 0.5 CO2 ... etc.
            LHC4ACCHO --> 0.5 LHC4ACCO3 + 0.25 MACRO2 + 0.25 LHMVKABO2 + 0.5 CO ... etc.
             LC578OOH --> 0.25 HOCHCHO + 0.25 ACETOL + 0.75 MGLYOX + 0.75 HOCH2CHO ... etc.
           LHC4ACCO3H --> 0.5 MACRO2 + 0.5 LHMVKABO2 + 2 OH + CO2
           LC5PAN1719 --> 0.7 LHC4ACCO3 + 0.15 MACRO2 + 0.15 LHMVKABO2 + 0.3 NO3 ... etc.
                HCOC5 --> HOCH2CO + 0.35 CH3COCH2O2 + 0.65 CH3 + 0.65 CO + 0.65 HCHO ... etc.
               C59OOH --> HOCH2CO + ACETOL + OH
              C511OOH --> HCOCH2CHO + CH3CO + OH
            CO23C4CHO --> BIACETO2 + CO + HO2
            CO23C4CHO --> HCOCH2CO3 + CH3CO
           CO23C4CO3H --> BIACETO2 + OH + CO2
              C512OOH --> C513O2 + OH
            CO13C4CHO --> CHOC3COO2 + CO + HO2
              C513OOH --> HOC2H4CO3 + GLYOX + OH
               C513CO --> HOC2H4CO3 + 2 CO + HO2
              C514OOH --> CO13C4CHO + OH + HO2
              C514NO3 --> CO13C4CHO + HO2 + NO2
       LZCODC23DBCOOH --> HVMK + CO + 2 OH
       LZCODC23DBCOOH --> CH3CO + HOCH2CHO + CO + OH
       LZCODC23DBCOOH --> HMAC + CO + 2 OH
       LZCODC23DBCOOH --> ACETOL + 2 CO + OH + HO2
       LZCO3HC23DBCOD --> 0.38 EZCHOCCH3CHO2 + 0.62 EZCH3CO2CHCHO + OH + CO2
       C1OOHC2OOHC4OD --> HYPERACET + 2 CO + OH + HO2
       C1OOHC2OOHC4OD --> 0.5 HOCHCHO + 0.5 HYPERACET + 0.5 CO2H3CHO + 0.5 HCHO ... etc.
               DB1OOH --> DB1O + OH
               DB2OOH --> 0.48 ACETOL + 0.52 MGLYOX + 0.48 GLYOX + 0.52 HOCH2CHO ... etc.
        C1ODC2OOHC4OD --> HOCHCHO + MGLYOX + OH
        C1ODC2OOHC4OD --> CO2H3CHO + CO + OH + HO2
              C4MDIAL --> 0.5 CH3COCHCO + 0.5 HCOCCH3CO + CO + OH + HO2
               DB1NO3 --> DB1O + NO2
           CHOC3COOOH --> CHOC3COO2 + OH + CO2
            LMBOABOOH --> CH3COCH3 + HOCH2CHO + OH + HO2
            LMBOABOOH --> IBUTALOH + HCHO + OH + HO2
               MBOACO --> IPRHOCO3 + HCHO + HO2
              MBOCOCO --> IPRHOCO3 + CO + HO2
           LNMBOABOOH --> NO3CH2CHO + CH3COCH3 + OH + HO2
           LNMBOABOOH --> IBUTALOH + HCHO + OH + NO2
            NC4OHCO3H --> IBUTALOH + OH + NO2 + CO2
                C54CO --> CH3CO + 3 CO + HO2
           C5134CO2OH --> CO23C3CHO + CO + 2 HO2
            C5DIALOOH --> MALDIAL + CO + OH + HO2
             C5CO14OH --> HCOCO2H + CH3CO + CO + HO2
             C5DICARB --> 0.4 TLFUONE + 0.6 C5CO14O2 + 0.6 HO2
           MC3ODBCO2H --> CH3COCO2H + 2 CO + 2 HO2
            ACCOMECHO --> MECOACETO2 + CO + HO2
           MMALNHYOOH --> CO2H3CO3 + OH + CO2
           C5DICAROOH --> MGLYOX + GLYOX + OH + HO2
             NTLFUOOH --> ACCOMECHO + OH + NO2
            C5CO14OOH --> 0.83 MALANHY + 0.17 MGLYOX + 0.83 CH3 + 0.17 CO + OH ... etc.
              TLFUOOH --> ACCOMECHO + OH + HO2
           ACCOMECO3H --> MECOACETO2 + OH + CO2
             C5DIALCO --> MALDIALCO3 + CO + HO2
              C614NO3 --> CO23C4CHO + HCHO + HO2 + NO2
              C614OOH --> CO23C4CHO + HCHO + OH + HO2
           CO235C5CHO --> CO23C4CO3 + CO + HO2
           CO235C6OOH --> CO23C4CO3 + HCHO + OH
              PHENOOH --> 0.29 PBZQONE + 0.71 MALDALCO2H + 0.71 GLYOX + OH + HO2 ... etc.
              C6CO4DB --> C4CO2DBCO3 + CO + HO2
           C5CO2DCO3H --> C33CO + CH3CO + OH + CO2
           NDNPHENOOH --> NC4DCO2H + HNO3 + 2 CO + OH + NO2
           BZBIPERNO3 --> BZFUONE + GLYOX + HO2 + NO2
            HOC6H4NO2 --> CPDKETENE + HONO
            CPDKETENE --> MALDIAL + CO + 2 HO2 + CO2
           C5COOHCO3H --> HOCOC4DIAL + CO + OH + HO2 + CO2
            BZEPOXMUC --> 0.5 C5DIALO2 + 0.5 MALDIAL + 1.5 CO + 1.5 HO2
            NPHEN1OOH --> NPHEN1O + OH
             BZEMUCCO --> C3DIALO2 + HCOCOHCO3
           BZEMUCCO2H --> C5DIALO2 + HO2 + CO2
           NNCATECOOH --> NC4DCO2H + HCOCO2H + OH + NO2
           C615CO2OOH --> C5DICARB + CO + OH + HO2
             NPHENOOH --> MALDALCO2H + GLYOX + OH + NO2
            NCATECOOH --> NC4DCO2H + HCOCO2H + OH + HO2
              PBZQOOH --> C5CO2OHCO3 + OH
           BZOBIPEROH --> MALDIALCO3 + GLYOX + HO2
           BZBIPEROOH --> BZFUONE + GLYOX + OH + HO2
              NBZQOOH --> C6CO4DB + OH + NO2
            CATEC1OOH --> CATEC1O + OH
              C6125CO --> C5CO14O2 + CO + HO2
            DNPHENOOH --> NC4DCO2H + HCOCO2H + OH + NO2
           BZEMUCCO3H --> C5DIALO2 + OH + CO2
              C6H5OOH --> C6H5O + OH
            BZEMUCOOH --> 0.5 C32OH13CO + 0.5 EPXC4DIAL + 0.5 C3DIALO2 + 0.5 GLYOX ... etc.
            BZEMUCNO3 --> EPXC4DIAL + GLYOX + HO2 + NO2
               DNPHEN --> NCPDKETENE + HONO
           NCPDKETENE --> NC4DCO2H + CO + 2 HO2 + CO2
           CO235C6CHO --> CHOC3COCO3 + CH3CO
           C235C6CO3H --> CO235C6O2 + OH + CO2
              C716OOH --> CO13C4CHO + CH3CO + OH
              C721OOH --> C722O2 + OH
              C722OOH --> C44O2 + CH3COCH3 + OH
            TLEPOXMUC --> 0.5 C615CO2O2 + 0.5 EPXC4DIAL + 0.5 CH3CO + CO + HO2 ... etc.
           C6H5CH2OOH --> BENZAL + OH + HO2
           C6H5CH2NO3 --> BENZAL + HO2 + NO2
               BENZAL --> C6H5O2 + CO + HO2
           TLBIPEROOH --> 0.2 BZFUONE + 0.2 TLFUONE + 0.2 MALDIAL + 0.2 C5DICARB ... etc.
           TLBIPERNO3 --> 0.2 BZFUONE + 0.2 TLFUONE + 0.2 MALDIAL + 0.2 C5DICARB ... etc.
           TLOBIPEROH --> C5CO14O2 + GLYOX + HO2
              CRESOOH --> 0.32 PTLQONE + 0.68 C5CO14OH + 0.68 GLYOX + OH + HO2 ... etc.
             NCRESOOH --> 0.32 PTLQONE + 0.68 C5CO14OH + 0.68 GLYOX + OH + HO2 ... etc.
             NCRESOOH --> C5CO14OH + GLYOX + OH + NO2
            TOL1OHNO2 --> MCPDKETENE + HONO
           TLEMUCCO2H --> C615CO2O2 + HO2 + CO2
           TLEMUCCO3H --> C615CO2O2 + OH + CO2
            TLEMUCOOH --> 0.5 EPXC4DIAL + 0.5 C3DIALO2 + 0.5 MGLYOX + 0.5 CO2H3CHO ... etc.
            TLEMUCNO3 --> EPXC4DIAL + CH3CO + CO + HO2 + NO2
             TLEMUCCO --> EPXC4DIAL + CH3CO + CO + HO2
             C6H5CO3H --> C6H5O2 + OH + CO2
             OXYL1OOH --> TOL1O + OH
             MNCATECH --> MCPDKETENE + HONO
           MCPDKETENE --> C4MDIAL + CO + 2 HO2 + CO2
               DNCRES --> MNCPDKETENE + HONO
          MNCPDKETENE --> NC4MDCO2H + CO + 2 HO2 + CO2
           MCATEC1OOH --> MCATEC1O + OH
             NPTLQOOH --> C7CO4DB + OH + NO2
              PTLQOOH --> C6CO2OHCO3 + OH
            NCRES1OOH --> NCRES1O + OH
           MNNCATCOOH --> NC4MDCO2H + HCOCO2H + OH + NO2
           MNCATECOOH --> NC4MDCO2H + HCOCO2H + OH + HO2
              C7CO4DB --> C5CO2DBCO3 + CO + HO2
           NDNCRESOOH --> NC4MDCO2H + HNO3 + 2 CO + OH + NO2
            DNCRESOOH --> NC4MDCO2H + HCOCO2H + OH + NO2
           C6COOHCO3H --> C5134CO2OH + CO + OH + HO2 + CO2
               C86OOH --> C511O2 + CH3COCH3 + OH
              C812OOH --> C813O2 + OH
              C813OOH --> C512O2 + CH3COCH3 + OH
              C721CHO --> C721O2 + CO + HO2
             C721CO3H --> C721O2 + OH + CO2
              C8BCOOH --> C89O2 + OH
               C89OOH --> C810O2 + OH
               C89NO3 --> C810O2 + NO2
              C810OOH --> C514O2 + CH3COCH3 + OH
              C810NO3 --> C514O2 + CH3COCH3 + NO2
              C8BCNO3 --> C89O2 + NO2
               C85OOH --> C86O2 + OH
            STYRENOOH --> BENZAL + HCHO + OH + HO2
               C96OOH --> C97O2 + OH
               C97OOH --> C98O2 + OH
               C98OOH --> C614O2 + CH3COCH3 + OH
             NORPINAL --> C85O2 + CO + HO2
             NORPINAL --> NORPINENOL
              C85CO3H --> C85O2 + OH + CO2
              C89CO2H --> 0.2 C89O2 + 0.8 C811CO3 + HO2 + 0.2 CO2
              C89CO3H --> 0.2 C89O2 + 0.8 C811CO3 + OH + 0.2 CO2
             C811CO3H --> C811O2 + OH + CO2
            NOPINDOOH --> C89CO3 + OH
           LAPINABOOH --> PINAL + OH + HO2
          MENTHEN6ONE --> RO6R1O2 + OH
       OH2MENTHEN6ONE --> 1 LCARBON + OH
                PINAL --> C96O2 + CO + HO2
                PINAL --> PINENOL
           PERPINONIC --> C96O2 + OH + CO2
             PINALOOH --> C106O2 + OH
             PINALNO3 --> C106O2 + NO2
              C106OOH --> C716O2 + CH3COCH3 + OH
              C106NO3 --> C716O2 + CH3COCH3 + NO2
              C109OOH --> C89CO3 + HCHO + OH
               C109CO --> C89CO3 + CO + HO2
          LNAPINABOOH --> PINAL + OH + NO2
             BPINAOOH --> NOPINONE + HCHO + OH + HO2
          LNBPINABOOH --> NOPINONE + HCHO + OH + NO2
            ROO6R1NO3 --> ROO6R3O2 + CH3COCH3 + NO2
             RO6R1NO3 --> 9 LCARBON + HCHO + HO2 + NO2
                  Cl2 --> 2 Cl
                Cl2O2 --> 2 Cl
                 OClO --> ClO + O3P
                  HCl --> H + Cl
                 HOCl --> Cl + OH
                ClNO2 --> Cl + NO2
                ClNO3 --> Cl + NO3
                ClNO3 --> ClO + NO2
                CH3Cl --> CH3 + Cl
                 CCl4 --> LCARBON + 4 Cl
              CH3CCl3 --> 2 LCARBON + 3 Cl
                CFCl3 --> LCARBON + LFLUORINE + 2 LCHLORINE + Cl
               CF2Cl2 --> LCARBON + 2 LFLUORINE + LCHLORINE + Cl
                  Br2 --> 2 Br
                  BrO --> O3P + Br
                 HOBr --> Br + OH
                BrNO2 --> Br + NO2
                BrNO3 --> 0.85 Br + 0.15 BrO + 0.85 NO3 + 0.15 NO2
                CH3Br --> CH3 + Br
               CH2Br2 --> LCARBON + 2 Br
                CHBr3 --> LCARBON + 3 Br
                CF3Br --> LCARBON + 3 LFLUORINE + Br
                 BrCl --> Cl + Br
              CF2ClBr --> LCARBON + 2 LFLUORINE + Cl + Br
              CH2ClBr --> LCARBON + Cl + Br
              CHCl2Br --> LCARBON + 2 Cl + Br
              CHClBr2 --> LCARBON + Cl + 2 Br
           N2O5 + H2O --> 2 HNO3
                 N2O5 --> 2 NO3m_cs + 2 Hp_cs
           HOCl + HCl --> Cl2 + H2O
          ClNO3 + HCl --> Cl2 + HNO3
          ClNO3 + H2O --> HOCl + HNO3
           N2O5 + HCl --> ClNO2 + HNO3
           HOBr + HBr --> Br2 + H2O
          BrNO3 + H2O --> HOBr + HNO3
          ClNO3 + HBr --> BrCl + HNO3
          BrNO3 + HCl --> BrCl + HNO3
           HOCl + HBr --> BrCl + H2O
           HOBr + HCl --> BrCl + H2O
