# Supplementary material for: Oxidation of low-molecular weight organic compounds in clouddroplets: development of the JAMOC chemical mechanism inCAABA/MECCA (version 4.5.0gmdd)
Source: Copernicus journal article supplement (doi:10.5194/gmd-2020-337), 2020-10-29
Supplement: Supplementary file 20 [file gmd-2020-337-supplement.zip › caaba_4.5.0gmdd/skeleton/EQN_TAGS.dat]

G1000
G1001
G1002a
G1003
G2100
G2101
G2102
G2103
G2104
G2105
G2106
G2107
G2108a
G2108b
G2108c
G2109
G2110
G2111
G2112
G2117
G2118
G3100
G3101
G3102a
G3102b
G3103
G3104
G3105
G3106
G3107
G3108
G3109
G3110
G3200
G3201
G3202
G3203
G3204
G3205
G3206
G3207
G3208
G3209
G3210
G3211
G3212
G3213
G3214
G3215
G3216
G3217
G3218
G3219
G3220
G3221
G3222
G3223
G3224
G4100
G4101
G4102
G4103a
G4103b
G4104a
G4104b
G4105
G4106a
G4106b
G4107
G4108
G4109
G4110
G4111
G4112
G4113
G4114
G4115
G4116
G4117
G4118
G4119a
G4119b
G4120a
G4120b
G4121
G4122
G4123
G4124
G4125
G4126
G4127
G4129a
G4129b
G4130a
G4130b
G4132
G4133
G4134
G4135
G4136
G4137
G4138
G4140
G4141
G4142
G4143
G4144
G4145
G4146
G4147
G4148
G4149
G4150
G4151
G4152
G4153
G4154
G4155
G4156
G4157
G4158
G4159
G4160a
G4160b
G4160c
G4161
G4162
G4163
G4164
G42000
G42001
G42002
G42003
G42004a
G42004b
G42005
G42006
G42007a
G42007b
G42008a
G42008b
G42009
G42010
G42011a
G42011b
G42011c
G42012
G42013
G42014
G42017a
G42017b
G42018
G42020
G42021
G42022a
G42022b
G42023a
G42023b
G42024a
G42024b
G42025
G42026
G42027a
G42027b
G42028a
G42028b
G42028c
G42029
G42030
G42031
G42032
G42033a
G42033b
G42034
G42035
G42036
G42037
G42038a
G42037b
G42037c
G42039a
G42039b
G42040
G42041
G42042
G42043
G42044
G42045a
G42045b
G42046
G42047
G42048
G42049a
G42049b
G42050
G42051a
G42051b
G42051c
G42052a
G42052b
G42053
G42054
G42055a
G42055b
G42056a
G42056b
G42057
G42058a
G42058b
G42058c
G42059
G42060
G42061
G42062a
G42062b
G42062c
G42063a
G42063b
G42064a
G42064b
G42065
G42066
G42067a
G42067b
G42068
G42069
G42070
G42071
G42072
G42073
G42074a
G42074b
G42075
G42076
G42077
G42078
G42079
G42080
G42081
G42082
G42083a
G42083b
G42084
G42085a
G42085b
G42086a
G42086b
G42086c
G42087
G42088
G42089a
G42089b
G42090
G42091
G43000a
G43000b
G43001a
G43001b
G43002
G43003
G43004
G43005a
G43005b
G43006
G43007a
G43007b
G43008
G43009a
G43009b
G43010
G43011
G43012a
G43012b
G43013a
G43013b
G43014
G43015a
G43015b
G43016
G43017
G43020
G43021
G43022
G43023a
G43023b
G43024a
G43024b
G43025
G43026a
G43026b
G43027
G43028
G43029
G43030a
G43030b
G43031
G43032
G43033
G43034
G43035
G43036
G43037
G43038a
G43038b
G43039
G43040a
G43040b
G43040c
G43041
G43042
G43043a
G43043b
G43044
G43045a
G43045b
G43045c
G43046
G43047
G43048
G43049
G43050
G43051a
G43051b
G43051c
G43052
G43053
G43054a
G43054b
G43055a
G43055b
G43055c
G43056
G43057
G43058
G43059
G43060a
G43060b
G43061
G43062
G43063a
G43063b
G43064
G43065
G43066
G43067
G43068
G43069
G43070a
G43070b
G43071a
G43072
G43073
G43074
G43202
G43203
G43204a
G43204b
G43205
G43206
G43207a
G43207b
G43207c
G43210
G43211
G43212
G43213a
G43213b
G43214
G43215a
G43215b
G43215c
G43218
G43219
G43220
G43221
G43222
G43223
G43415
G43418a
G43418b
G43419
G43420
G43421
G43422a
G43422b
G43424
G43425
G43426
G43427
G43428
G43442
G43443
G43444
G43446
G44000
G44001a
G44001b
G44002
G44003a
G44003b
G44003c
G44004a
G44004b
G44005a
G44005b
G44005c
G44006a
G44006b
G44007
G44008
G44009a
G44009b
G44010a
G44010b
G44011
G44012
G44013
G44014a
G44014b
G44015a
G44015b
G44016
G44017
G44018
G44019
G44020
G44021a
G44021b
G44022a
G44022b
G44023a
G44023b
G44024
G44025
G44026
G44027
G44028
G44029
G44030a
G44030b
G44031a
G44031b
G44031c
G44032
G44033
G44034
G44035
G44036a
G44036b
G44037a
G44037b
G44038
G44039a
G44039b
G44039c
G44040
G44041
G44042
G44043a
G44043b
G44044
G44045a
G44045b
G44046a
G44046b
G44047
G44048a
G44048b
G44049a
G44049b
G44050
G44051
G44052a
G44052b
G44052c
G44053
G44054
G44055a
G44055b
G44056
G44057a
G44057b
G44058
G44059
G44060
G44061a
G44061b
G44062a
G44062b
G44063
G44064
G44065
G44066
G44067
G44068
G44069
G44070
G44071
G44072
G44073
G44074
G44075
G44076
G44077
G44078
G44079
G44080
G44081
G44082
G44083
G44084
G44085
G44086
G44087
G44088a
G44088b
G44089
G44090
G44091a
G44091b
G44092a
G44092b
G44093
G44094a
G44094b
G44095
G44096
G44097a
G44097b
G44098
G44099
G44100a
G44100b
G44101a
G44101b
G44102
G44103a
G44103b
G44104
G44105
G44106
G44107
G44108
G44109
G44110
G44111
G44112a
G44112b
G44113a
G44113b
G44114
G44115a
G44115b
G44115c
G44116
G44117
G44118
G44119
G44120
G44121a
G44121b
G44122
G44123
G44124a
G44124b
G44125
G44126
G44127
G44128
G44129
G44130
G44131
G44132
G44133
G44134
G44135
G44136
G44137
G44138
G44139
G44140
G44141
G44142
G44200
G44201
G44202
G44203a
G44203b
G44204
G44205
G44206
G44207
G44208
G44209
G44210
G44211
G44212
G44213
G44214
G44215a
G44215b
G44216
G44217
G44218
G44219
G44220
G44221
G44222
G44223
G44224a
G44224b
G44224c
G44225
G44226
G44227
G44228a
G44228b
G44229
G44230
G44231
G44232
G44233a
G44233b
G44234
G44235
G44236
G44400
G44401a
G44401b
G44402
G44403
G44404
G44405
G44406a
G44406b
G44406c
G44407
G44408
G44409
G44410
G44411
G44412
G44413
G44414
G44415
G44416
G44417a
G44417b
G44417c
G44418
G44419
G44420
G44421
G44422
G44423
G44424
G44425
G44426
G44427
G44428
G44429a
G44429b
G44430
G44431
G44432
G44433
G44434
G44435a
G44435b
G44436
G44437
G44438
G44439
G44440
G44441
G44442a
G44442b
G44443
G44444
G44445
G44446
G44447
G44448
G44449a
G44449b
G44450
G44451
G44452
G44453
G44456a
G44456b
G44457
G44458
G44459
G44460
G44461
G44462
G45000
G45001
G45002
G45003a
G45003b
G45004a
G45004b
G45005
G45006
G45007
G45008
G45009a
G45009b
G45010a
G45010b
G45011
G45012
G45013a
G45013b
G45014
G45015
G45016
G45017a
G45017b
G45018
G45019a
G45019b
G45019c
G45019d
G45020
G45021
G45022
G45023a
G45023b
G45024a
G45024b
G45025
G45026a
G45026b
G45026c
G45027
G45028
G45029
G45030
G45031a
G45031b
G45032a
G45032b
G45033
G45034a
G45034b
G45034c
G45034d
G45035
G45036
G45037
G45038
G45039
G45040
G45041
G45042
G45043
G45044
G45045
G45046
G45047
G45048
G45049
G45050a
G45050b
G45050c
G45051
G45052
G45053
G45054a
G45054b
G45055
G45056
G45057
G45058a
G45058b
G45059a
G45059b
G45060a
G45060b
G45060c
G45061
G45062
G45063
G45064a
G45064b
G45065
G45066
G45067
G45068
G45069
G45070a
G45070b
G45071
G45072
G45073
G45074
G45075
G45076
G45077a
G45077b
G45077c
G45077d
G45078
G45079
G45080
G45081a
G45081b
G45082
G45083
G45084a
G45084b
G45084c
G45085
G45086
G45087
G45088
G45089
G45090
G45091
G45092a
G45092b
G45093
G45094a
G45094b
G45095
G45096
G45097a
G45097b
G45098
G45099
G45100
G45101
G45102
G45103
G45104a
G45104b
G45105a
G45105b
G45106
G45107
G45108a
G45108b
G45109
G45110a
G45110b
G45111
G45112
G45113
G45114a
G45114b
G45115
G45116
G45117
G45118
G45119a
G45119b
G45120
G45121a
G45121b
G45122a
G45122b
G45123
G45124
G45125
G45126a
G45126b
G45127a
G45127b
G45128
G45129
G45130
G45131
G45132
G45133
G45134a
G45134b
G45135
G45136
G45137
G45138
G45139
G45200
G45201
G45202a
G45202b
G45203
G45204
G45205
G45206
G45207
G45208
G45209a
G45209b
G45210
G45211
G45212
G45213
G45214
G45215
G45216
G45217
G45218a
G45218b
G45219
G45220
G45221
G45222
G45223
G45224
G45225
G45226
G45227
G45228a
G45228b
G45229
G45230
G45231
G45232
G45233
G45234
G45235
G45236
G45237a
G45237b
G45238
G45239
G45240a
G45240b
G45240c
G45241a
G45241b
G45242a
G45242b
G45243
G45244
G45245
G45246
G45247
G45248
G45249
G45250a
G45250b
G45251
G45252a
G45252b
G45253
G45254
G45255
G45256
G45257
G45258
G45259
G45260
G45400
G45401
G45402
G45403a
G45403b
G45404
G45405
G45406
G45407
G45408
G45409
G45410
G45411a
G45411b
G45412
G45413
G45414
G45415
G45416
G45421a
G45421b
G45422
G45423
G45424
G45428
G45429
G45430a
G45430b
G45430c
G45431
G45432
G45433
G45434
G45436
G45441
G45442
G45443
G45444
G45451
G45452
G45453
G45454a
G45454b
G45455
G45456
G45457
G45458
G45459
G45464
G45465
G45466
G45467a
G45467b
G45468
G45469
G45470
G45471
G45476a
G45476b
G45477
G45478
G45479
G45480
G45483
G45485
G45486a
G45486b
G45487
G45488
G45489
G45490a
G45491b
G45492
G45493
G45494
G46200a
G46200b
G46201
G46202
G46203
G46204
G46205a
G46205b
G46206a
G46206b
G46207
G46208
G46209
G46210
G46211
G46400
G46401
G46402
G46403
G46404a
G46404b
G46405
G46406
G46407
G46408
G46409
G46410
G46411
G46412
G46413a
G46413b
G46414
G46415
G46416
G46417
G46418
G46419
G46420
G46421
G46422
G46423
G46424a
G46424b
G46425
G46426
G46427
G46428
G46429
G46430
G46431
G46432a
G46432b
G46433
G46434
G46435
G46436
G46437a
G46437b
G46438
G46439
G46440
G46441
G46442
G46443
G46444
G46445
G46446
G46447a
G46447b
G46448
G46449
G46450
G46451
G46452
G46453
G46454
G46455
G46456
G46457
G46458
G46459
G46460
G46461a
G46461b
G46462
G46463
G46464
G46465
G46466a
G46466b
G46467
G46468
G46469
G46470
G46471
G46472a
G46472b
G46473
G46474
G46475
G46476
G46477
G46478
G46479
G46480a
G46480b
G46481
G46482
G46483
G46484
G46485a
G46485b
G46486
G46487
G46488
G46489
G46490a
G46490b
G46491a
G46491b
G46492
G46493
G46494
G46495
G46496
G46497
G46498
G46499a
G46499b
G46500
G46501
G46502
G46503
G46504
G46505a
G46505b
G46506
G46507
G46508
G46509
G46510
G46511a
G46511b
G46511c
G46512
G46513
G46514
G46515
G46516
G46517a
G46517b
G46518
G46519
G46521
G46522a
G46522b
G46523a
G46523b
G46524
G46525
G47200
G47201
G47202a
G47202b
G47203
G47204
G47205
G47206
G47207
G47208
G47209a
G47209b
G47210
G47211
G47212
G47213
G47214
G47215
G47216
G47217
G47218
G47219
G47220
G47221
G47222
G47223
G47224
G47225
G47226
G47400
G47401
G47402a
G47402b
G47403
G47404
G47405
G47406
G47407a
G47407b
G47408a
G47408b
G47409
G47410
G47411
G47412
G47413
G47414
G47415
G47416
G47417
G47418a
G47418b
G47419
G47420
G47421
G47422a
G47422b
G47423
G47424
G47425
G47426
G47427
G47428
G47429
G47430
G47431
G47432
G47433
G47434a
G47434b
G47434c
G47435
G47436
G47437
G47438
G47439a
G47439b
G47440a
G47440b
G47441
G47442
G47443a
G47443b
G47443c
G47444
G47445
G47446
G47447
G47448
G47449
G47450
G47451
G47452
G47453
G47454
G47455
G47456
G47457
G47458
G47459
G47460
G47461
G47462
G47463
G47464
G47465
G47466
G47467
G47468
G47469
G47470
G47471
G47472
G47473
G47474
G47475
G47476
G47477
G47478
G47479
G47480
G47481
G47482a
G47482b
G47483
G47484
G47485
G47486a
G47486b
G47487
G47488
G47489
G47490
G47491
G47492
G47493
G47494
G47495
G47496
G47497a
G47497b
G47498
G47499
G47500
G47501a
G47501b
G47502
G47503
G47504
G47505
G47506
G47507
G47508
G47509a
G47509b
G47510
G47511
G47512
G47513a
G47513b
G47514
G47515
G47516
G47517
G47518
G47519
G47520
G47521a
G47521b
G47522
G47523
G47524
G47525
G47526
G47527
G47528
G47529
G47530
G48200
G48201
G48202
G48203
G48204
G48205
G48206
G48207
G48208
G48209
G48210
G48211
G48212
G48213
G48214
G48215
G48216
G48217
G48218
G48219
G48220
G48221a
G48221b
G48221c
G48222
G48223
G48224
G48225
G48226
G48227
G48228
G48229
G48230
G48231
G48232
G48233a
G48233b
G48234
G48235
G48236
G48237
G48238
G48239a
G48239b
G48240
G48241
G48242
G48243
G48244
G48245a
G48245b
G48246
G48247
G48248
G48249
G48400a
G48400b
G48400c
G48400d
G48401
G48402
G48403
G48404
G48405
G48406
G48407
G48408
G48409
G48410
G48411
G48412a
G48412b
G48413
G48414
G48415
G48416
G49200
G49201
G49202a
G49202b
G49203
G49204a
G49205b
G49206
G49207
G49208a
G49208b
G49209
G49210
G49211a
G49211b
G49212
G49213
G49214
G49215
G49216
G49217
G49218
G49219a
G49219b
G49220
G49221
G49222
G49223a
G49223b
G49224a
G49224b
G49224c
G49225
G49226
G49227
G49228
G49229
G49230
G49231a
G49231b
G49232a
G49232b
G49232c
G49233
G49234
G49235
G49236
G49237a
G49237b
G49238
G49239
G49240
G49241
G49242
G49243
G49244
G49245
G49246
G49247
G49248
G49249
G49250
G49251
G49400a
G49400b
G49400c
G49400d
G49401
G40200
G40201a
G40201b
G40202a
G40202b
G40203
G40204
G40205
G40206
G40207
G40208
G40209
G40210
G40211
G40212
G40213a
G40213b
G40214a
G40214b
G40214c
G40215
G40216
G40217
G40218
G40219
G40220
G40221
G40222
G40223a
G40223b
G40224
G40225
G40226
G40227
G40228a
G40228b
G40229
G40230
G40231
G40232
G40233
G40234
G40235
G40236
G40237a
G40237b
G40238
G40239
G40240
G40241
G40242
G40243a
G40243b
G40244
G40245
G40246
G40247
G40248
G40249
G40250
G40251
G40252a
G40252b
G40253a
G40253b
G40254a
G40254b
G40255
G40256
G40257
G40258a
G40258b
G40259
G40260
G40261a
G40261b
G40262
G40263
G40264a
G40264b
G40265
G40266
G40267a
G40267b
G40267c
G40267d
G40268
G40269
G40270
G40271
G40272a
G40272b
G40273
G40274
G40275
G40276
G40277
G40278
G40279a
G40279b
G40279c
G40280a
G40280b
G40280c
G40280d
G40280e
G40281
G40282a
G40282b
G40283a
G40283b
G40283c
G40283d
G40284
G40285a
G40285b
G40286a
G40286b
G40286c
G40286d
G40287
G40400
G40401
G6100
G6101
G6102a
G6102b
G6102c
G6102d
G6103
G6200
G6201a
G6201b
G6202
G6203
G6204
G6205
G6206
G6300
G6301
G6302
G6303
G6304
G6400
G6401
G6402
G6403
G6404
G6405
G6406
G6407
G6408
G6409
G6410
G6411
G6412
G6413
G6414
G6415
G6416
G6500
G6501
G7100
G7101
G7102a
G7102b
G7200
G7201
G7202
G7203
G7204
G7300
G7301
G7302
G7303
G7400
G7401
G7402
G7403
G7404
G7405
G7406
G7407
G7408
G7600
G7601
G7602
G7603a
G7603b
G7603c
G7604
G7605
G7606
G7607
G9200
G9400a
G9400b
G9401
G9402
G9403
G9404
G9405
G9408
G9409
G9410
G9411
G9412
G9600
G9700
G9701
J1000a
J1001a
J1001b
J2100a
J2101
J3100
J3101
J3102a
J3103a
J3103b
J3104
J3200
J3201
J3202
J41000
J41001a
J41001b
J41002
J41003
J41004
J41005
J41006
J41007
J41008
J41009
J41010
J42000
J42001a
J42001b
J42002
J42004
J42005a
J42005b
J42005c
J42006
J42007
J42008
J42009
J42010
J42011
J42012
J42013
J42014
J42015
J42016
J42017
J42018
J42019
J42020
J42021
J43000
J43001
J43002
J43003
J43004
J43005
J43006
J43007
J43009
J43010
J43011
J43012
J43013
J43014
J43015
J43016
J43017
J43018
J43019
J43020
J43021
J43022
J43023
J43024
J43025a
J43025b
J43026
J43027
J43028a
J43028b
J43200
J43400
J43401
J43402
J44000a
J44000b
J44001
J44002
J44003
J44004
J44005a
J44005b
J44006
J44007a
J44007b
J44008
J44009
J44010
J44011
J44012
J44013
J44014
J44015
J44016
J44017a
J44017b
J44018a
J44018b
J44019
J44020a
J44020b
J44021
J44022
J44023a
J44023b
J44024
J44025
J44026
J44027
J44028
J44029
J44030
J44031
J44032
J44033
J44034
J44035
J44036
J44037a
J44037b
J44038
J44039
J44040
J44041
J44042
J44043
J44044
J44045a
J44045b
J44046a
J44046b
J44200
J44201
J44400a
J44400b
J44401
J44402
J44403
J44404a
J44404b
J44405
J44406
J44407
J44408
J44409
J44410
J44411
J44412
J44414
J45002
J45003
J45004
J45005
J45006
J45007
J45008
J45009
J45010
J45011
J45012
J45013
J45014
J45015
J45016
J45017
J45018a
J45018b
J45019
J45020
J45021
J45022
J45023
J45024
J45025
J45026a
J45026b
J45026c
J45026d
J45027
J45028a
J45028b
J45029
J45030
J45031a
J45031b
J45032
J45033
J45034
J45200a
J45200b
J45201
J45202
J45203a
J45203b
J45204
J45400
J45401
J45402
J45406
J45407
J45408
J45409
J45410
J45411
J45412
J45414
J45415
J45417
J45418
J46200
J46201
J46202
J46203
J46400
J46401
J46402
J46403
J46404
J46405
J46406
J46407
J46408
J46409
J46410
J46411
J46412
J46413
J46414
J46415
J46416
J46417
J46418
J46419
J46420
J46421
J46422
J46423
J46424
J46425
J46427
J46428
J46429
J47200
J47201
J47202
J47203
J47204
J47400
J47401
J47402
J47403
J47404
J47405
J47406
J47407
J47408a
J47408b
J47409
J47410
J47411
J47412
J47413
J47414
J47415
J47416
J47417
J47418
J47419
J47420
J47421
J47422
J47423
J47424
J47425
J47426
J47427
J47428
J47429
J47430
J48200
J48201
J48202
J48203
J48204
J48205
J48206
J48207
J48208
J48209
J48210
J48211
J48400
J49200
J49201
J49202
J49203a
J49203b
J49204
J49205
J49206
J49207
J49208
J40200
J40201
J40202
J40203a
J40203b
J40204
J40205
J40206
J40207
J40208
J40209
J40210
J40211
J40212
J40213
J40214
J40215
J6000
J6100
J6101
J6200
J6201
J6300
J6301a
J6301b
J6400
J6401
J6402
J6500
J6501
J7000
J7100
J7200
J7300
J7301
J7400
J7401
J7402
J7500
J7600
J7601
J7602
J7603
J7604
HET200
HET201
HET410
HET420
HET421
HET422
HET510
HET520
HET540
HET541
HET542
HET543
