# Supplementary material for: Oxidation of low-molecular weight organic compounds in clouddroplets: development of the JAMOC chemical mechanism inCAABA/MECCA (version 4.5.0gmdd)
Source: Copernicus journal article supplement (doi:10.5194/gmd-2020-337), 2020-10-29
Supplement: Supplementary file 20 [file gmd-2020-337-supplement.zip › caaba_4.5.0gmdd/skeleton/samplepoints/levels.txt]

# ---------------------------------------------------------------
# LEVELS
# ---------------------------------------------------------------
  31
  26
#  20
#  10
#   8
# ----------------------------------------------------------------------------
