# Supplementary material for: Oxidation of low-molecular weight organic compounds in clouddroplets: development of the JAMOC chemical mechanism inCAABA/MECCA (version 4.5.0gmdd)
Source: Copernicus journal article supplement (doi:10.5194/gmd-2020-337), 2020-10-29
Supplement: Supplementary file 20 [file gmd-2020-337-supplement.zip › caaba_4.5.0gmdd/skeleton/samplepoints/skeleton_samplepoints_small.txt]

RUN  nml_temp nml_press O3       NO2       C5H8     CO       J_COH2   J_H2O2   J_CHOH   J_NO2    J_NO2O  J_NOO2  J_O1D  
1    295.7156 101325    7.88E-8  7.88E-10  1.0E-10  70.0E-9  2.93E-5  4.57E-6  1.98E-5  5.76E-3  0.11    0.014   2.14E-5
2    291.0671 100000    9.48E-8  5.48E-10  2.0E-10  90.0E-9  2.88E-5  4.49E-6  1.95E-5  5.66E-3  0.11    0.014   2.10E-5
