# Supplementary material for: Oxidation of low-molecular weight organic compounds in clouddroplets: development of the JAMOC chemical mechanism inCAABA/MECCA (version 4.5.0gmdd)
Source: Copernicus journal article supplement (doi:10.5194/gmd-2020-337), 2020-10-29
Supplement: Supplementary file 20 [file gmd-2020-337-supplement.zip › caaba_4.5.0gmdd/skeleton/skeleton.bat]

# -*- Shell-script -*-

# Author: Rolf Sander (2016 - 2018)
# The shell variables defined here will be used by xmecca 
# when it is run in batch mode (i.e. not interactive).

 set apn          = 0                 # number of aerosol phases [0...99, default=0]
 set gaseqnfile   = gas.eqn
 set rplfile      = skeleton          # reduce to skeletal mechanism
#set wanted       = "\!Ara"
 set wanted       = "(((Tr && (G || Het) && \!I) || St) && \!Hg)" # from CCMI-base-02
 set enthalpy     = n                 # activate enthalpy in kJ/mol?
 set mcfct        = n                 # Monte-Carlo factor?
 set diagtracfile =                   # diagnostic tracers?
 set rxnrates     = n                 # calculate accumulated reaction rates?
 set tag          = n                 # perform (isotope) tagging?
 set kppoption    = k                 # k=kpp, 4=kp4, q=quit
 set integr       = rosenbrock_posdef # integrator
 set decomp       = n                 # remove indirect indexing
 set latex        = n                 # latex list of reactions?
 set graphviz     = n                 # graphviz plots?
 set deltmpkp4    = y                 # delete temporary kp4 files?
 set deltmp       = y                 # delete temporary xmecca files?
