# Supplementary material for: Oxidation of low-molecular weight organic compounds in clouddroplets: development of the JAMOC chemical mechanism inCAABA/MECCA (version 4.5.0gmdd)
Source: Copernicus journal article supplement (doi:10.5194/gmd-2020-337), 2020-10-29
Supplement: Supplementary file 20 [file gmd-2020-337-supplement.zip › caaba_4.5.0gmdd/skeleton/skeleton.rpl]

// -*- kpp -*- kpp mode for emacs
// created automatically by ./xskeleton.py at 2019-05-03-19:44:37, DO NOT EDIT!
// ctrlfile = ctrl/loworg.py
//
// target               abstol     reltol
// HCHO                 1E-12      0.2 
// NO                   1E-12      0.2 
// OH                   1E-15      0.2 
// HO2                  1E-15      0.2 
// O3                   1E-12      0.2 
//
// sample point file = skeleton_samplepoints_30_loworg.nc
// epsilon0          = 0.0005
// eps_increase      = 1.4
// skeleton number = 1, nvar = 390/663, nreact = 1189/2091, eps = 0.0007
#REPLACE <G3100>   
#ENDREPLACE
#REPLACE <G3104>   
#ENDREPLACE
#REPLACE <G3107>   
#ENDREPLACE
#REPLACE <G4120a>  
#ENDREPLACE
#REPLACE <G4122>   
#ENDREPLACE
#REPLACE <G4129b>  
#ENDREPLACE
#REPLACE <G4132>   
#ENDREPLACE
#REPLACE <G4148>   
#ENDREPLACE
#REPLACE <G4149>   
#ENDREPLACE
#REPLACE <G4150>   
#ENDREPLACE
#REPLACE <G42004b> 
#ENDREPLACE
#REPLACE <G42062b> 
#ENDREPLACE
#REPLACE <G42064a> 
#ENDREPLACE
#REPLACE <G42064b> 
#ENDREPLACE
#REPLACE <G42073>  
#ENDREPLACE
#REPLACE <G42077>  
#ENDREPLACE
#REPLACE <G42079>  
#ENDREPLACE
#REPLACE <G43005b> 
#ENDREPLACE
#REPLACE <G43006>  
#ENDREPLACE
#REPLACE <G43008>  
#ENDREPLACE
#REPLACE <G43009b> 
#ENDREPLACE
#REPLACE <G43010>  
#ENDREPLACE
#REPLACE <G43020>  
#ENDREPLACE
#REPLACE <G43024b> 
#ENDREPLACE
#REPLACE <G43042>  
#ENDREPLACE
#REPLACE <G43043a> 
#ENDREPLACE
#REPLACE <G43043b> 
#ENDREPLACE
#REPLACE <G43044>  
#ENDREPLACE
#REPLACE <G43045b> 
#ENDREPLACE
#REPLACE <G43047>  
#ENDREPLACE
#REPLACE <G43051a> 
#ENDREPLACE
#REPLACE <G43051b> 
#ENDREPLACE
#REPLACE <G43051c> 
#ENDREPLACE
#REPLACE <G43054b> 
#ENDREPLACE
#REPLACE <G43055b> 
#ENDREPLACE
#REPLACE <G43055c> 
#ENDREPLACE
#REPLACE <G43059>  
#ENDREPLACE
#REPLACE <G43060a> 
#ENDREPLACE
#REPLACE <G43060b> 
#ENDREPLACE
#REPLACE <G43062>  
#ENDREPLACE
#REPLACE <G43063a> 
#ENDREPLACE
#REPLACE <G43063b> 
#ENDREPLACE
#REPLACE <G43064>  
#ENDREPLACE
#REPLACE <G43065>  
#ENDREPLACE
#REPLACE <G43066>  
#ENDREPLACE
#REPLACE <G43067>  
#ENDREPLACE
#REPLACE <G43069>  
#ENDREPLACE
#REPLACE <G43070a> 
#ENDREPLACE
#REPLACE <G43070b> 
#ENDREPLACE
#REPLACE <G43204b> 
#ENDREPLACE
#REPLACE <G43207a> 
#ENDREPLACE
#REPLACE <G43207b> 
#ENDREPLACE
#REPLACE <G43212>  
#ENDREPLACE
#REPLACE <G43215a> 
#ENDREPLACE
#REPLACE <G43220>  
#ENDREPLACE
#REPLACE <G43223>  
#ENDREPLACE
#REPLACE <G43415>  
#ENDREPLACE
#REPLACE <G43418a> 
#ENDREPLACE
#REPLACE <G43422b> 
#ENDREPLACE
#REPLACE <G43425>  
#ENDREPLACE
#REPLACE <G43428>  
#ENDREPLACE
#REPLACE <G43442>  
#ENDREPLACE
#REPLACE <G43443>  
#ENDREPLACE
#REPLACE <G43444>  
#ENDREPLACE
#REPLACE <G43446>  
#ENDREPLACE
#REPLACE <G44001a> 
#ENDREPLACE
#REPLACE <G44003a> 
#ENDREPLACE
#REPLACE <G44003c> 
#ENDREPLACE
#REPLACE <G44004a> 
#ENDREPLACE
#REPLACE <G44005b> 
#ENDREPLACE
#REPLACE <G44006b> 
#ENDREPLACE
#REPLACE <G44009b> 
#ENDREPLACE
#REPLACE <G44011>  
#ENDREPLACE
#REPLACE <G44012>  
#ENDREPLACE
#REPLACE <G44013>  
#ENDREPLACE
#REPLACE <G44014a> 
#ENDREPLACE
#REPLACE <G44014b> 
#ENDREPLACE
#REPLACE <G44015a> 
#ENDREPLACE
#REPLACE <G44015b> 
#ENDREPLACE
#REPLACE <G44016>  
#ENDREPLACE
#REPLACE <G44020>  
#ENDREPLACE
#REPLACE <G44021b> 
#ENDREPLACE
#REPLACE <G44022a> 
#ENDREPLACE
#REPLACE <G44022b> 
#ENDREPLACE
#REPLACE <G44023a> 
#ENDREPLACE
#REPLACE <G44023b> 
#ENDREPLACE
#REPLACE <G44035>  
#ENDREPLACE
#REPLACE <G44040>  
#ENDREPLACE
#REPLACE <G44056>  
#ENDREPLACE
#REPLACE <G44065>  
#ENDREPLACE
#REPLACE <G44069>  
#ENDREPLACE
#REPLACE <G44070>  
#ENDREPLACE
#REPLACE <G44071>  
#ENDREPLACE
#REPLACE <G44072>  
#ENDREPLACE
#REPLACE <G44073>  
#ENDREPLACE
#REPLACE <G44074>  
#ENDREPLACE
#REPLACE <G44075>  
#ENDREPLACE
#REPLACE <G44080>  
#ENDREPLACE
#REPLACE <G44081>  
#ENDREPLACE
#REPLACE <G44082>  
#ENDREPLACE
#REPLACE <G44083>  
#ENDREPLACE
#REPLACE <G44086>  
#ENDREPLACE
#REPLACE <G44092b> 
#ENDREPLACE
#REPLACE <G44095>  
#ENDREPLACE
#REPLACE <G44101b> 
#ENDREPLACE
#REPLACE <G44104>  
#ENDREPLACE
#REPLACE <G44112a> 
#ENDREPLACE
#REPLACE <G44113b> 
#ENDREPLACE
#REPLACE <G44115a> 
#ENDREPLACE
#REPLACE <G44115b> 
#ENDREPLACE
#REPLACE <G44115c> 
#ENDREPLACE
#REPLACE <G44116>  
#ENDREPLACE
#REPLACE <G44117>  
#ENDREPLACE
#REPLACE <G44118>  
#ENDREPLACE
#REPLACE <G44119>  
#ENDREPLACE
#REPLACE <G44120>  
#ENDREPLACE
#REPLACE <G44121a> 
#ENDREPLACE
#REPLACE <G44121b> 
#ENDREPLACE
#REPLACE <G44122>  
#ENDREPLACE
#REPLACE <G44123>  
#ENDREPLACE
#REPLACE <G44124a> 
#ENDREPLACE
#REPLACE <G44124b> 
#ENDREPLACE
#REPLACE <G44125>  
#ENDREPLACE
#REPLACE <G44126>  
#ENDREPLACE
#REPLACE <G44127>  
#ENDREPLACE
#REPLACE <G44128>  
#ENDREPLACE
#REPLACE <G44129>  
#ENDREPLACE
#REPLACE <G44130>  
#ENDREPLACE
#REPLACE <G44131>  
#ENDREPLACE
#REPLACE <G44132>  
#ENDREPLACE
#REPLACE <G44201>  
#ENDREPLACE
#REPLACE <G44203a> 
#ENDREPLACE
#REPLACE <G44203b> 
#ENDREPLACE
#REPLACE <G44204>  
#ENDREPLACE
#REPLACE <G44205>  
#ENDREPLACE
#REPLACE <G44206>  
#ENDREPLACE
#REPLACE <G44207>  
#ENDREPLACE
#REPLACE <G44209>  
#ENDREPLACE
#REPLACE <G44211>  
#ENDREPLACE
#REPLACE <G44212>  
#ENDREPLACE
#REPLACE <G44213>  
#ENDREPLACE
#REPLACE <G44215a> 
#ENDREPLACE
#REPLACE <G44216>  
#ENDREPLACE
#REPLACE <G44218>  
#ENDREPLACE
#REPLACE <G44219>  
#ENDREPLACE
#REPLACE <G44220>  
#ENDREPLACE
#REPLACE <G44223>  
#ENDREPLACE
#REPLACE <G44224a> 
#ENDREPLACE
#REPLACE <G44224b> 
#ENDREPLACE
#REPLACE <G44224c> 
#ENDREPLACE
#REPLACE <G44225>  
#ENDREPLACE
#REPLACE <G44226>  
#ENDREPLACE
#REPLACE <G44227>  
#ENDREPLACE
#REPLACE <G44228a> 
#ENDREPLACE
#REPLACE <G44228b> 
#ENDREPLACE
#REPLACE <G44229>  
#ENDREPLACE
#REPLACE <G44230>  
#ENDREPLACE
#REPLACE <G44231>  
#ENDREPLACE
#REPLACE <G44232>  
#ENDREPLACE
#REPLACE <G44233a> 
#ENDREPLACE
#REPLACE <G44233b> 
#ENDREPLACE
#REPLACE <G44234>  
#ENDREPLACE
#REPLACE <G44235>  
#ENDREPLACE
#REPLACE <G44236>  
#ENDREPLACE
#REPLACE <G44401a> 
#ENDREPLACE
#REPLACE <G44401b> 
#ENDREPLACE
#REPLACE <G44404>  
#ENDREPLACE
#REPLACE <G44405>  
#ENDREPLACE
#REPLACE <G44406b> 
#ENDREPLACE
#REPLACE <G44415>  
#ENDREPLACE
#REPLACE <G44416>  
#ENDREPLACE
#REPLACE <G44417b> 
#ENDREPLACE
#REPLACE <G44417c> 
#ENDREPLACE
#REPLACE <G44425>  
#ENDREPLACE
#REPLACE <G44433>  
#ENDREPLACE
#REPLACE <G44434>  
#ENDREPLACE
#REPLACE <G44442a> 
#ENDREPLACE
#REPLACE <G44448>  
#ENDREPLACE
#REPLACE <G44449a> 
#ENDREPLACE
#REPLACE <G44453>  
#ENDREPLACE
#REPLACE <G44456a> 
#ENDREPLACE
#REPLACE <G44456b> 
#ENDREPLACE
#REPLACE <G44457>  
#ENDREPLACE
#REPLACE <G44458>  
#ENDREPLACE
#REPLACE <G44459>  
#ENDREPLACE
#REPLACE <G44462>  
#ENDREPLACE
#REPLACE <G45011>  
#ENDREPLACE
#REPLACE <G45012>  
#ENDREPLACE
#REPLACE <G45013a> 
#ENDREPLACE
#REPLACE <G45014>  
#ENDREPLACE
#REPLACE <G45015>  
#ENDREPLACE
#REPLACE <G45016>  
#ENDREPLACE
#REPLACE <G45017a> 
#ENDREPLACE
#REPLACE <G45018>  
#ENDREPLACE
#REPLACE <G45019a> 
#ENDREPLACE
#REPLACE <G45019b> 
#ENDREPLACE
#REPLACE <G45019c> 
#ENDREPLACE
#REPLACE <G45019d> 
#ENDREPLACE
#REPLACE <G45020>  
#ENDREPLACE
#REPLACE <G45022>  
#ENDREPLACE
#REPLACE <G45028>  
#ENDREPLACE
#REPLACE <G45030>  
#ENDREPLACE
#REPLACE <G45036>  
#ENDREPLACE
#REPLACE <G45050a> 
#ENDREPLACE
#REPLACE <G45050b> 
#ENDREPLACE
#REPLACE <G45052>  
#ENDREPLACE
#REPLACE <G45053>  
#ENDREPLACE
#REPLACE <G45054a> 
#ENDREPLACE
#REPLACE <G45054b> 
#ENDREPLACE
#REPLACE <G45055>  
#ENDREPLACE
#REPLACE <G45056>  
#ENDREPLACE
#REPLACE <G45057>  
#ENDREPLACE
#REPLACE <G45058a> 
#ENDREPLACE
#REPLACE <G45058b> 
#ENDREPLACE
#REPLACE <G45059a> 
#ENDREPLACE
#REPLACE <G45059b> 
#ENDREPLACE
#REPLACE <G45060a> 
#ENDREPLACE
#REPLACE <G45060b> 
#ENDREPLACE
#REPLACE <G45060c> 
#ENDREPLACE
#REPLACE <G45061>  
#ENDREPLACE
#REPLACE <G45062>  
#ENDREPLACE
#REPLACE <G45063>  
#ENDREPLACE
#REPLACE <G45064a> 
#ENDREPLACE
#REPLACE <G45064b> 
#ENDREPLACE
#REPLACE <G45065>  
#ENDREPLACE
#REPLACE <G45066>  
#ENDREPLACE
#REPLACE <G45077a> 
#ENDREPLACE
#REPLACE <G45077b> 
#ENDREPLACE
#REPLACE <G45077c> 
#ENDREPLACE
#REPLACE <G45079>  
#ENDREPLACE
#REPLACE <G45080>  
#ENDREPLACE
#REPLACE <G45081a> 
#ENDREPLACE
#REPLACE <G45081b> 
#ENDREPLACE
#REPLACE <G45082>  
#ENDREPLACE
#REPLACE <G45084a> 
#ENDREPLACE
#REPLACE <G45084b> 
#ENDREPLACE
#REPLACE <G45084c> 
#ENDREPLACE
#REPLACE <G45086>  
#ENDREPLACE
#REPLACE <G45087>  
#ENDREPLACE
#REPLACE <G45088>  
#ENDREPLACE
#REPLACE <G45089>  
#ENDREPLACE
#REPLACE <G45091>  
#ENDREPLACE
#REPLACE <G45092a> 
#ENDREPLACE
#REPLACE <G45092b> 
#ENDREPLACE
#REPLACE <G45093>  
#ENDREPLACE
#REPLACE <G45094a> 
#ENDREPLACE
#REPLACE <G45094b> 
#ENDREPLACE
#REPLACE <G45095>  
#ENDREPLACE
#REPLACE <G45096>  
#ENDREPLACE
#REPLACE <G45103>  
#ENDREPLACE
#REPLACE <G45104a> 
#ENDREPLACE
#REPLACE <G45104b> 
#ENDREPLACE
#REPLACE <G45105a> 
#ENDREPLACE
#REPLACE <G45105b> 
#ENDREPLACE
#REPLACE <G45106>  
#ENDREPLACE
#REPLACE <G45107>  
#ENDREPLACE
#REPLACE <G45114a> 
#ENDREPLACE
#REPLACE <G45114b> 
#ENDREPLACE
#REPLACE <G45115>  
#ENDREPLACE
#REPLACE <G45116>  
#ENDREPLACE
#REPLACE <G45118>  
#ENDREPLACE
#REPLACE <G45119a> 
#ENDREPLACE
#REPLACE <G45119b> 
#ENDREPLACE
#REPLACE <G45126a> 
#ENDREPLACE
#REPLACE <G45126b> 
#ENDREPLACE
#REPLACE <G45127a> 
#ENDREPLACE
#REPLACE <G45127b> 
#ENDREPLACE
#REPLACE <G45128>  
#ENDREPLACE
#REPLACE <G45129>  
#ENDREPLACE
#REPLACE <G45133>  
#ENDREPLACE
#REPLACE <G45134a> 
#ENDREPLACE
#REPLACE <G45134b> 
#ENDREPLACE
#REPLACE <G45135>  
#ENDREPLACE
#REPLACE <G45136>  
#ENDREPLACE
#REPLACE <G45137>  
#ENDREPLACE
#REPLACE <G45138>  
#ENDREPLACE
#REPLACE <G45139>  
#ENDREPLACE
#REPLACE <G45204>  
#ENDREPLACE
#REPLACE <G45205>  
#ENDREPLACE
#REPLACE <G45208>  
#ENDREPLACE
#REPLACE <G45209a> 
#ENDREPLACE
#REPLACE <G45210>  
#ENDREPLACE
#REPLACE <G45211>  
#ENDREPLACE
#REPLACE <G45213>  
#ENDREPLACE
#REPLACE <G45215>  
#ENDREPLACE
#REPLACE <G45218a> 
#ENDREPLACE
#REPLACE <G45221>  
#ENDREPLACE
#REPLACE <G45223>  
#ENDREPLACE
#REPLACE <G45224>  
#ENDREPLACE
#REPLACE <G45226>  
#ENDREPLACE
#REPLACE <G45227>  
#ENDREPLACE
#REPLACE <G45228a> 
#ENDREPLACE
#REPLACE <G45228b> 
#ENDREPLACE
#REPLACE <G45229>  
#ENDREPLACE
#REPLACE <G45230>  
#ENDREPLACE
#REPLACE <G45231>  
#ENDREPLACE
#REPLACE <G45232>  
#ENDREPLACE
#REPLACE <G45233>  
#ENDREPLACE
#REPLACE <G45234>  
#ENDREPLACE
#REPLACE <G45235>  
#ENDREPLACE
#REPLACE <G45236>  
#ENDREPLACE
#REPLACE <G45237a> 
#ENDREPLACE
#REPLACE <G45237b> 
#ENDREPLACE
#REPLACE <G45238>  
#ENDREPLACE
#REPLACE <G45239>  
#ENDREPLACE
#REPLACE <G45240a> 
#ENDREPLACE
#REPLACE <G45240b> 
#ENDREPLACE
#REPLACE <G45240c> 
#ENDREPLACE
#REPLACE <G45241a> 
#ENDREPLACE
#REPLACE <G45241b> 
#ENDREPLACE
#REPLACE <G45242a> 
#ENDREPLACE
#REPLACE <G45242b> 
#ENDREPLACE
#REPLACE <G45243>  
#ENDREPLACE
#REPLACE <G45244>  
#ENDREPLACE
#REPLACE <G45245>  
#ENDREPLACE
#REPLACE <G45246>  
#ENDREPLACE
#REPLACE <G45247>  
#ENDREPLACE
#REPLACE <G45248>  
#ENDREPLACE
#REPLACE <G45249>  
#ENDREPLACE
#REPLACE <G45250a> 
#ENDREPLACE
#REPLACE <G45250b> 
#ENDREPLACE
#REPLACE <G45251>  
#ENDREPLACE
#REPLACE <G45252a> 
#ENDREPLACE
#REPLACE <G45252b> 
#ENDREPLACE
#REPLACE <G45253>  
#ENDREPLACE
#REPLACE <G45254>  
#ENDREPLACE
#REPLACE <G45255>  
#ENDREPLACE
#REPLACE <G45256>  
#ENDREPLACE
#REPLACE <G45257>  
#ENDREPLACE
#REPLACE <G45258>  
#ENDREPLACE
#REPLACE <G45259>  
#ENDREPLACE
#REPLACE <G45260>  
#ENDREPLACE
#REPLACE <G45400>  
#ENDREPLACE
#REPLACE <G45401>  
#ENDREPLACE
#REPLACE <G45402>  
#ENDREPLACE
#REPLACE <G45407>  
#ENDREPLACE
#REPLACE <G45411a> 
#ENDREPLACE
#REPLACE <G45411b> 
#ENDREPLACE
#REPLACE <G45412>  
#ENDREPLACE
#REPLACE <G45413>  
#ENDREPLACE
#REPLACE <G45414>  
#ENDREPLACE
#REPLACE <G45415>  
#ENDREPLACE
#REPLACE <G45416>  
#ENDREPLACE
#REPLACE <G45421a> 
#ENDREPLACE
#REPLACE <G45421b> 
#ENDREPLACE
#REPLACE <G45422>  
#ENDREPLACE
#REPLACE <G45423>  
#ENDREPLACE
#REPLACE <G45424>  
#ENDREPLACE
#REPLACE <G45428>  
#ENDREPLACE
#REPLACE <G45429>  
#ENDREPLACE
#REPLACE <G45430c> 
#ENDREPLACE
#REPLACE <G45443>  
#ENDREPLACE
#REPLACE <G45444>  
#ENDREPLACE
#REPLACE <G45454a> 
#ENDREPLACE
#REPLACE <G45459>  
#ENDREPLACE
#REPLACE <G45466>  
#ENDREPLACE
#REPLACE <G45467a> 
#ENDREPLACE
#REPLACE <G45467b> 
#ENDREPLACE
#REPLACE <G45470>  
#ENDREPLACE
#REPLACE <G45476a> 
#ENDREPLACE
#REPLACE <G45480>  
#ENDREPLACE
#REPLACE <G45483>  
#ENDREPLACE
#REPLACE <G45485>  
#ENDREPLACE
#REPLACE <G45490a> 
#ENDREPLACE
#REPLACE <G45491b> 
#ENDREPLACE
#REPLACE <G45492>  
#ENDREPLACE
#REPLACE <G45493>  
#ENDREPLACE
#REPLACE <G45494>  
#ENDREPLACE
#REPLACE <G46200a> 
#ENDREPLACE
#REPLACE <G46200b> 
#ENDREPLACE
#REPLACE <G46201>  
#ENDREPLACE
#REPLACE <G46202>  
#ENDREPLACE
#REPLACE <G46203>  
#ENDREPLACE
#REPLACE <G46204>  
#ENDREPLACE
#REPLACE <G46205a> 
#ENDREPLACE
#REPLACE <G46205b> 
#ENDREPLACE
#REPLACE <G46206a> 
#ENDREPLACE
#REPLACE <G46206b> 
#ENDREPLACE
#REPLACE <G46207>  
#ENDREPLACE
#REPLACE <G46208>  
#ENDREPLACE
#REPLACE <G46209>  
#ENDREPLACE
#REPLACE <G46210>  
#ENDREPLACE
#REPLACE <G46211>  
#ENDREPLACE
#REPLACE <G46400>  
#ENDREPLACE
#REPLACE <G46402>  
#ENDREPLACE
#REPLACE <G46404a> 
#ENDREPLACE
#REPLACE <G46408>  
#ENDREPLACE
#REPLACE <G46409>  
#ENDREPLACE
#REPLACE <G46410>  
#ENDREPLACE
#REPLACE <G46417>  
#ENDREPLACE
#REPLACE <G46421>  
#ENDREPLACE
#REPLACE <G46424a> 
#ENDREPLACE
#REPLACE <G46424b> 
#ENDREPLACE
#REPLACE <G46425>  
#ENDREPLACE
#REPLACE <G46426>  
#ENDREPLACE
#REPLACE <G46427>  
#ENDREPLACE
#REPLACE <G46428>  
#ENDREPLACE
#REPLACE <G46431>  
#ENDREPLACE
#REPLACE <G46432a> 
#ENDREPLACE
#REPLACE <G46436>  
#ENDREPLACE
#REPLACE <G46442>  
#ENDREPLACE
#REPLACE <G46443>  
#ENDREPLACE
#REPLACE <G46446>  
#ENDREPLACE
#REPLACE <G46451>  
#ENDREPLACE
#REPLACE <G46456>  
#ENDREPLACE
#REPLACE <G46461a> 
#ENDREPLACE
#REPLACE <G46465>  
#ENDREPLACE
#REPLACE <G46466a> 
#ENDREPLACE
#REPLACE <G46466b> 
#ENDREPLACE
#REPLACE <G46467>  
#ENDREPLACE
#REPLACE <G46468>  
#ENDREPLACE
#REPLACE <G46469>  
#ENDREPLACE
#REPLACE <G46470>  
#ENDREPLACE
#REPLACE <G46471>  
#ENDREPLACE
#REPLACE <G46478>  
#ENDREPLACE
#REPLACE <G46479>  
#ENDREPLACE
#REPLACE <G46480a> 
#ENDREPLACE
#REPLACE <G46480b> 
#ENDREPLACE
#REPLACE <G46481>  
#ENDREPLACE
#REPLACE <G46482>  
#ENDREPLACE
#REPLACE <G46483>  
#ENDREPLACE
#REPLACE <G46485a> 
#ENDREPLACE
#REPLACE <G46485b> 
#ENDREPLACE
#REPLACE <G46486>  
#ENDREPLACE
#REPLACE <G46487>  
#ENDREPLACE
#REPLACE <G46488>  
#ENDREPLACE
#REPLACE <G46490a> 
#ENDREPLACE
#REPLACE <G46490b> 
#ENDREPLACE
#REPLACE <G46491a> 
#ENDREPLACE
#REPLACE <G46491b> 
#ENDREPLACE
#REPLACE <G46492>  
#ENDREPLACE
#REPLACE <G46493>  
#ENDREPLACE
#REPLACE <G46494>  
#ENDREPLACE
#REPLACE <G46495>  
#ENDREPLACE
#REPLACE <G46496>  
#ENDREPLACE
#REPLACE <G46498>  
#ENDREPLACE
#REPLACE <G46499a> 
#ENDREPLACE
#REPLACE <G46503>  
#ENDREPLACE
#REPLACE <G46508>  
#ENDREPLACE
#REPLACE <G46510>  
#ENDREPLACE
#REPLACE <G46511a> 
#ENDREPLACE
#REPLACE <G46511b> 
#ENDREPLACE
#REPLACE <G46513>  
#ENDREPLACE
#REPLACE <G46521>  
#ENDREPLACE
#REPLACE <G46523a> 
#ENDREPLACE
#REPLACE <G47200>  
#ENDREPLACE
#REPLACE <G47201>  
#ENDREPLACE
#REPLACE <G47202a> 
#ENDREPLACE
#REPLACE <G47202b> 
#ENDREPLACE
#REPLACE <G47203>  
#ENDREPLACE
#REPLACE <G47204>  
#ENDREPLACE
#REPLACE <G47205>  
#ENDREPLACE
#REPLACE <G47206>  
#ENDREPLACE
#REPLACE <G47207>  
#ENDREPLACE
#REPLACE <G47208>  
#ENDREPLACE
#REPLACE <G47209a> 
#ENDREPLACE
#REPLACE <G47209b> 
#ENDREPLACE
#REPLACE <G47210>  
#ENDREPLACE
#REPLACE <G47211>  
#ENDREPLACE
#REPLACE <G47212>  
#ENDREPLACE
#REPLACE <G47213>  
#ENDREPLACE
#REPLACE <G47214>  
#ENDREPLACE
#REPLACE <G47215>  
#ENDREPLACE
#REPLACE <G47216>  
#ENDREPLACE
#REPLACE <G47217>  
#ENDREPLACE
#REPLACE <G47218>  
#ENDREPLACE
#REPLACE <G47219>  
#ENDREPLACE
#REPLACE <G47220>  
#ENDREPLACE
#REPLACE <G47221>  
#ENDREPLACE
#REPLACE <G47222>  
#ENDREPLACE
#REPLACE <G47223>  
#ENDREPLACE
#REPLACE <G47224>  
#ENDREPLACE
#REPLACE <G47225>  
#ENDREPLACE
#REPLACE <G47226>  
#ENDREPLACE
#REPLACE <G47402a> 
#ENDREPLACE
#REPLACE <G47408b> 
#ENDREPLACE
#REPLACE <G47415>  
#ENDREPLACE
#REPLACE <G47429>  
#ENDREPLACE
#REPLACE <G47432>  
#ENDREPLACE
#REPLACE <G47434b> 
#ENDREPLACE
#REPLACE <G47434c> 
#ENDREPLACE
#REPLACE <G47436>  
#ENDREPLACE
#REPLACE <G47439a> 
#ENDREPLACE
#REPLACE <G47440a> 
#ENDREPLACE
#REPLACE <G47443a> 
#ENDREPLACE
#REPLACE <G47445>  
#ENDREPLACE
#REPLACE <G47459>  
#ENDREPLACE
#REPLACE <G47460>  
#ENDREPLACE
#REPLACE <G47461>  
#ENDREPLACE
#REPLACE <G47462>  
#ENDREPLACE
#REPLACE <G47463>  
#ENDREPLACE
#REPLACE <G47464>  
#ENDREPLACE
#REPLACE <G47465>  
#ENDREPLACE
#REPLACE <G47466>  
#ENDREPLACE
#REPLACE <G47468>  
#ENDREPLACE
#REPLACE <G47469>  
#ENDREPLACE
#REPLACE <G47476>  
#ENDREPLACE
#REPLACE <G47486a> 
#ENDREPLACE
#REPLACE <G47491>  
#ENDREPLACE
#REPLACE <G47492>  
#ENDREPLACE
#REPLACE <G47497a> 
#ENDREPLACE
#REPLACE <G47501a> 
#ENDREPLACE
#REPLACE <G47501b> 
#ENDREPLACE
#REPLACE <G47502>  
#ENDREPLACE
#REPLACE <G47503>  
#ENDREPLACE
#REPLACE <G47504>  
#ENDREPLACE
#REPLACE <G47507>  
#ENDREPLACE
#REPLACE <G47508>  
#ENDREPLACE
#REPLACE <G47509a> 
#ENDREPLACE
#REPLACE <G47513a> 
#ENDREPLACE
#REPLACE <G47513b> 
#ENDREPLACE
#REPLACE <G47514>  
#ENDREPLACE
#REPLACE <G47515>  
#ENDREPLACE
#REPLACE <G47516>  
#ENDREPLACE
#REPLACE <G47517>  
#ENDREPLACE
#REPLACE <G47518>  
#ENDREPLACE
#REPLACE <G47519>  
#ENDREPLACE
#REPLACE <G47521b> 
#ENDREPLACE
#REPLACE <G47526>  
#ENDREPLACE
#REPLACE <G47527>  
#ENDREPLACE
#REPLACE <G47528>  
#ENDREPLACE
#REPLACE <G48217>  
#ENDREPLACE
#REPLACE <G48218>  
#ENDREPLACE
#REPLACE <G48219>  
#ENDREPLACE
#REPLACE <G48220>  
#ENDREPLACE
#REPLACE <G48221a> 
#ENDREPLACE
#REPLACE <G48221b> 
#ENDREPLACE
#REPLACE <G48221c> 
#ENDREPLACE
#REPLACE <G48222>  
#ENDREPLACE
#REPLACE <G48223>  
#ENDREPLACE
#REPLACE <G48224>  
#ENDREPLACE
#REPLACE <G48225>  
#ENDREPLACE
#REPLACE <G48226>  
#ENDREPLACE
#REPLACE <G48227>  
#ENDREPLACE
#REPLACE <G48228>  
#ENDREPLACE
#REPLACE <G48229>  
#ENDREPLACE
#REPLACE <G48230>  
#ENDREPLACE
#REPLACE <G48231>  
#ENDREPLACE
#REPLACE <G48232>  
#ENDREPLACE
#REPLACE <G48233a> 
#ENDREPLACE
#REPLACE <G48233b> 
#ENDREPLACE
#REPLACE <G48234>  
#ENDREPLACE
#REPLACE <G48235>  
#ENDREPLACE
#REPLACE <G48236>  
#ENDREPLACE
#REPLACE <G48237>  
#ENDREPLACE
#REPLACE <G48239b> 
#ENDREPLACE
#REPLACE <G48243>  
#ENDREPLACE
#REPLACE <G48245a> 
#ENDREPLACE
#REPLACE <G48245b> 
#ENDREPLACE
#REPLACE <G48246>  
#ENDREPLACE
#REPLACE <G48247>  
#ENDREPLACE
#REPLACE <G48249>  
#ENDREPLACE
#REPLACE <G48406>  
#ENDREPLACE
#REPLACE <G48412a> 
#ENDREPLACE
#REPLACE <G48412b> 
#ENDREPLACE
#REPLACE <G48413>  
#ENDREPLACE
#REPLACE <G48414>  
#ENDREPLACE
#REPLACE <G48415>  
#ENDREPLACE
#REPLACE <G48416>  
#ENDREPLACE
#REPLACE <G49202b> 
#ENDREPLACE
#REPLACE <G49203>  
#ENDREPLACE
#REPLACE <G49210>  
#ENDREPLACE
#REPLACE <G49211a> 
#ENDREPLACE
#REPLACE <G49211b> 
#ENDREPLACE
#REPLACE <G49218>  
#ENDREPLACE
#REPLACE <G49219a> 
#ENDREPLACE
#REPLACE <G49220>  
#ENDREPLACE
#REPLACE <G49221>  
#ENDREPLACE
#REPLACE <G49222>  
#ENDREPLACE
#REPLACE <G49223b> 
#ENDREPLACE
#REPLACE <G49224a> 
#ENDREPLACE
#REPLACE <G49224b> 
#ENDREPLACE
#REPLACE <G49227>  
#ENDREPLACE
#REPLACE <G49228>  
#ENDREPLACE
#REPLACE <G49231b> 
#ENDREPLACE
#REPLACE <G49232a> 
#ENDREPLACE
#REPLACE <G49232b> 
#ENDREPLACE
#REPLACE <G49234>  
#ENDREPLACE
#REPLACE <G49235>  
#ENDREPLACE
#REPLACE <G49240>  
#ENDREPLACE
#REPLACE <G49241>  
#ENDREPLACE
#REPLACE <G49246>  
#ENDREPLACE
#REPLACE <G49247>  
#ENDREPLACE
#REPLACE <G49248>  
#ENDREPLACE
#REPLACE <G49249>  
#ENDREPLACE
#REPLACE <G49250>  
#ENDREPLACE
#REPLACE <G49251>  
#ENDREPLACE
#REPLACE <G40200>  
#ENDREPLACE
#REPLACE <G40201a> 
#ENDREPLACE
#REPLACE <G40201b> 
#ENDREPLACE
#REPLACE <G40202a> 
#ENDREPLACE
#REPLACE <G40202b> 
#ENDREPLACE
#REPLACE <G40203>  
#ENDREPLACE
#REPLACE <G40204>  
#ENDREPLACE
#REPLACE <G40205>  
#ENDREPLACE
#REPLACE <G40206>  
#ENDREPLACE
#REPLACE <G40207>  
#ENDREPLACE
#REPLACE <G40208>  
#ENDREPLACE
#REPLACE <G40209>  
#ENDREPLACE
#REPLACE <G40210>  
#ENDREPLACE
#REPLACE <G40213b> 
#ENDREPLACE
#REPLACE <G40214a> 
#ENDREPLACE
#REPLACE <G40214b> 
#ENDREPLACE
#REPLACE <G40220>  
#ENDREPLACE
#REPLACE <G40221>  
#ENDREPLACE
#REPLACE <G40223b> 
#ENDREPLACE
#REPLACE <G40226>  
#ENDREPLACE
#REPLACE <G40228a> 
#ENDREPLACE
#REPLACE <G40228b> 
#ENDREPLACE
#REPLACE <G40229>  
#ENDREPLACE
#REPLACE <G40231>  
#ENDREPLACE
#REPLACE <G40232>  
#ENDREPLACE
#REPLACE <G40233>  
#ENDREPLACE
#REPLACE <G40234>  
#ENDREPLACE
#REPLACE <G40235>  
#ENDREPLACE
#REPLACE <G40236>  
#ENDREPLACE
#REPLACE <G40237a> 
#ENDREPLACE
#REPLACE <G40237b> 
#ENDREPLACE
#REPLACE <G40238>  
#ENDREPLACE
#REPLACE <G40239>  
#ENDREPLACE
#REPLACE <G40240>  
#ENDREPLACE
#REPLACE <G40241>  
#ENDREPLACE
#REPLACE <G40242>  
#ENDREPLACE
#REPLACE <G40243a> 
#ENDREPLACE
#REPLACE <G40243b> 
#ENDREPLACE
#REPLACE <G40246>  
#ENDREPLACE
#REPLACE <G40254b> 
#ENDREPLACE
#REPLACE <G40257>  
#ENDREPLACE
#REPLACE <G40258a> 
#ENDREPLACE
#REPLACE <G40258b> 
#ENDREPLACE
#REPLACE <G40260>  
#ENDREPLACE
#REPLACE <G40261a> 
#ENDREPLACE
#REPLACE <G40261b> 
#ENDREPLACE
#REPLACE <G40262>  
#ENDREPLACE
#REPLACE <G40263>  
#ENDREPLACE
#REPLACE <G40264a> 
#ENDREPLACE
#REPLACE <G40264b> 
#ENDREPLACE
#REPLACE <G40265>  
#ENDREPLACE
#REPLACE <G40266>  
#ENDREPLACE
#REPLACE <G40272b> 
#ENDREPLACE
#REPLACE <G40274>  
#ENDREPLACE
#REPLACE <G40275>  
#ENDREPLACE
#REPLACE <G40276>  
#ENDREPLACE
#REPLACE <G40277>  
#ENDREPLACE
#REPLACE <G40278>  
#ENDREPLACE
#REPLACE <G40279a> 
#ENDREPLACE
#REPLACE <G40279b> 
#ENDREPLACE
#REPLACE <G40279c> 
#ENDREPLACE
#REPLACE <G40280a> 
#ENDREPLACE
#REPLACE <G40280b> 
#ENDREPLACE
#REPLACE <G40280c> 
#ENDREPLACE
#REPLACE <G40280d> 
#ENDREPLACE
#REPLACE <G40280e> 
#ENDREPLACE
#REPLACE <G40281>  
#ENDREPLACE
#REPLACE <G6102a>  
#ENDREPLACE
#REPLACE <G6102c>  
#ENDREPLACE
#REPLACE <G6102d>  
#ENDREPLACE
#REPLACE <G6103>   
#ENDREPLACE
#REPLACE <G6200>   
#ENDREPLACE
#REPLACE <G6201a>  
#ENDREPLACE
#REPLACE <G6202>   
#ENDREPLACE
#REPLACE <G6203>   
#ENDREPLACE
#REPLACE <G6204>   
#ENDREPLACE
#REPLACE <G6205>   
#ENDREPLACE
#REPLACE <G6206>   
#ENDREPLACE
#REPLACE <G6301>   
#ENDREPLACE
#REPLACE <G6302>   
#ENDREPLACE
#REPLACE <G6303>   
#ENDREPLACE
#REPLACE <G6304>   
#ENDREPLACE
#REPLACE <G6400>   
#ENDREPLACE
#REPLACE <G6401>   
#ENDREPLACE
#REPLACE <G6402>   
#ENDREPLACE
#REPLACE <G6404>   
#ENDREPLACE
#REPLACE <G6405>   
#ENDREPLACE
#REPLACE <G6407>   
#ENDREPLACE
#REPLACE <G6408>   
#ENDREPLACE
#REPLACE <G6409>   
#ENDREPLACE
#REPLACE <G6410>   
#ENDREPLACE
#REPLACE <G6411>   
#ENDREPLACE
#REPLACE <G6412>   
#ENDREPLACE
#REPLACE <G6413>   
#ENDREPLACE
#REPLACE <G6414>   
#ENDREPLACE
#REPLACE <G6415>   
#ENDREPLACE
#REPLACE <G6416>   
#ENDREPLACE
#REPLACE <G6500>   
#ENDREPLACE
#REPLACE <G6501>   
#ENDREPLACE
#REPLACE <G7102b>  
#ENDREPLACE
#REPLACE <G7204>   
#ENDREPLACE
#REPLACE <G7300>   
#ENDREPLACE
#REPLACE <G7403>   
#ENDREPLACE
#REPLACE <G7407>   
#ENDREPLACE
#REPLACE <G7408>   
#ENDREPLACE
#REPLACE <G7600>   
#ENDREPLACE
#REPLACE <G7601>   
#ENDREPLACE
#REPLACE <G7602>   
#ENDREPLACE
#REPLACE <G7603a>  
#ENDREPLACE
#REPLACE <G7603c>  
#ENDREPLACE
#REPLACE <G7604>   
#ENDREPLACE
#REPLACE <G7605>   
#ENDREPLACE
#REPLACE <G7606>   
#ENDREPLACE
#REPLACE <G7607>   
#ENDREPLACE
#REPLACE <G9410>   
#ENDREPLACE
#REPLACE <G9411>   
#ENDREPLACE
#REPLACE <G9412>   
#ENDREPLACE
#REPLACE <G9600>   
#ENDREPLACE
#REPLACE <J3102a>  
#ENDREPLACE
#REPLACE <J41004>  
#ENDREPLACE
#REPLACE <J41010>  
#ENDREPLACE
#REPLACE <J42013>  
#ENDREPLACE
#REPLACE <J42019>  
#ENDREPLACE
#REPLACE <J42020>  
#ENDREPLACE
#REPLACE <J43006>  
#ENDREPLACE
#REPLACE <J43015>  
#ENDREPLACE
#REPLACE <J43016>  
#ENDREPLACE
#REPLACE <J43019>  
#ENDREPLACE
#REPLACE <J43021>  
#ENDREPLACE
#REPLACE <J43023>  
#ENDREPLACE
#REPLACE <J43024>  
#ENDREPLACE
#REPLACE <J43027>  
#ENDREPLACE
#REPLACE <J43200>  
#ENDREPLACE
#REPLACE <J43400>  
#ENDREPLACE
#REPLACE <J43401>  
#ENDREPLACE
#REPLACE <J43402>  
#ENDREPLACE
#REPLACE <J44000a> 
#ENDREPLACE
#REPLACE <J44003>  
#ENDREPLACE
#REPLACE <J44004>  
#ENDREPLACE
#REPLACE <J44005a> 
#ENDREPLACE
#REPLACE <J44005b> 
#ENDREPLACE
#REPLACE <J44010>  
#ENDREPLACE
#REPLACE <J44019>  
#ENDREPLACE
#REPLACE <J44020a> 
#ENDREPLACE
#REPLACE <J44020b> 
#ENDREPLACE
#REPLACE <J44021>  
#ENDREPLACE
#REPLACE <J44022>  
#ENDREPLACE
#REPLACE <J44023a> 
#ENDREPLACE
#REPLACE <J44023b> 
#ENDREPLACE
#REPLACE <J44024>  
#ENDREPLACE
#REPLACE <J44025>  
#ENDREPLACE
#REPLACE <J44028>  
#ENDREPLACE
#REPLACE <J44030>  
#ENDREPLACE
#REPLACE <J44033>  
#ENDREPLACE
#REPLACE <J44034>  
#ENDREPLACE
#REPLACE <J44035>  
#ENDREPLACE
#REPLACE <J44036>  
#ENDREPLACE
#REPLACE <J44037a> 
#ENDREPLACE
#REPLACE <J44037b> 
#ENDREPLACE
#REPLACE <J44038>  
#ENDREPLACE
#REPLACE <J44039>  
#ENDREPLACE
#REPLACE <J44040>  
#ENDREPLACE
#REPLACE <J44041>  
#ENDREPLACE
#REPLACE <J44042>  
#ENDREPLACE
#REPLACE <J44200>  
#ENDREPLACE
#REPLACE <J44201>  
#ENDREPLACE
#REPLACE <J44400a> 
#ENDREPLACE
#REPLACE <J44400b> 
#ENDREPLACE
#REPLACE <J44401>  
#ENDREPLACE
#REPLACE <J44402>  
#ENDREPLACE
#REPLACE <J44404a> 
#ENDREPLACE
#REPLACE <J44404b> 
#ENDREPLACE
#REPLACE <J44405>  
#ENDREPLACE
#REPLACE <J44408>  
#ENDREPLACE
#REPLACE <J44409>  
#ENDREPLACE
#REPLACE <J44414>  
#ENDREPLACE
#REPLACE <J45002>  
#ENDREPLACE
#REPLACE <J45003>  
#ENDREPLACE
#REPLACE <J45009>  
#ENDREPLACE
#REPLACE <J45011>  
#ENDREPLACE
#REPLACE <J45012>  
#ENDREPLACE
#REPLACE <J45013>  
#ENDREPLACE
#REPLACE <J45014>  
#ENDREPLACE
#REPLACE <J45018a> 
#ENDREPLACE
#REPLACE <J45018b> 
#ENDREPLACE
#REPLACE <J45019>  
#ENDREPLACE
#REPLACE <J45020>  
#ENDREPLACE
#REPLACE <J45022>  
#ENDREPLACE
#REPLACE <J45023>  
#ENDREPLACE
#REPLACE <J45024>  
#ENDREPLACE
#REPLACE <J45025>  
#ENDREPLACE
#REPLACE <J45027>  
#ENDREPLACE
#REPLACE <J45028a> 
#ENDREPLACE
#REPLACE <J45028b> 
#ENDREPLACE
#REPLACE <J45029>  
#ENDREPLACE
#REPLACE <J45033>  
#ENDREPLACE
#REPLACE <J45034>  
#ENDREPLACE
#REPLACE <J45200a> 
#ENDREPLACE
#REPLACE <J45200b> 
#ENDREPLACE
#REPLACE <J45201>  
#ENDREPLACE
#REPLACE <J45202>  
#ENDREPLACE
#REPLACE <J45203a> 
#ENDREPLACE
#REPLACE <J45203b> 
#ENDREPLACE
#REPLACE <J45204>  
#ENDREPLACE
#REPLACE <J45400>  
#ENDREPLACE
#REPLACE <J45408>  
#ENDREPLACE
#REPLACE <J45410>  
#ENDREPLACE
#REPLACE <J45411>  
#ENDREPLACE
#REPLACE <J45414>  
#ENDREPLACE
#REPLACE <J45415>  
#ENDREPLACE
#REPLACE <J45417>  
#ENDREPLACE
#REPLACE <J46200>  
#ENDREPLACE
#REPLACE <J46201>  
#ENDREPLACE
#REPLACE <J46202>  
#ENDREPLACE
#REPLACE <J46203>  
#ENDREPLACE
#REPLACE <J46400>  
#ENDREPLACE
#REPLACE <J46401>  
#ENDREPLACE
#REPLACE <J46402>  
#ENDREPLACE
#REPLACE <J46404>  
#ENDREPLACE
#REPLACE <J46407>  
#ENDREPLACE
#REPLACE <J46409>  
#ENDREPLACE
#REPLACE <J46410>  
#ENDREPLACE
#REPLACE <J46411>  
#ENDREPLACE
#REPLACE <J46413>  
#ENDREPLACE
#REPLACE <J46415>  
#ENDREPLACE
#REPLACE <J46416>  
#ENDREPLACE
#REPLACE <J46419>  
#ENDREPLACE
#REPLACE <J46421>  
#ENDREPLACE
#REPLACE <J46422>  
#ENDREPLACE
#REPLACE <J46423>  
#ENDREPLACE
#REPLACE <J46425>  
#ENDREPLACE
#REPLACE <J46427>  
#ENDREPLACE
#REPLACE <J46428>  
#ENDREPLACE
#REPLACE <J46429>  
#ENDREPLACE
#REPLACE <J47200>  
#ENDREPLACE
#REPLACE <J47201>  
#ENDREPLACE
#REPLACE <J47202>  
#ENDREPLACE
#REPLACE <J47203>  
#ENDREPLACE
#REPLACE <J47204>  
#ENDREPLACE
#REPLACE <J47402>  
#ENDREPLACE
#REPLACE <J47405>  
#ENDREPLACE
#REPLACE <J47410>  
#ENDREPLACE
#REPLACE <J47411>  
#ENDREPLACE
#REPLACE <J47412>  
#ENDREPLACE
#REPLACE <J47413>  
#ENDREPLACE
#REPLACE <J47414>  
#ENDREPLACE
#REPLACE <J47415>  
#ENDREPLACE
#REPLACE <J47419>  
#ENDREPLACE
#REPLACE <J47420>  
#ENDREPLACE
#REPLACE <J47423>  
#ENDREPLACE
#REPLACE <J47424>  
#ENDREPLACE
#REPLACE <J47425>  
#ENDREPLACE
#REPLACE <J47426>  
#ENDREPLACE
#REPLACE <J47427>  
#ENDREPLACE
#REPLACE <J47428>  
#ENDREPLACE
#REPLACE <J47429>  
#ENDREPLACE
#REPLACE <J47430>  
#ENDREPLACE
#REPLACE <J48202>  
#ENDREPLACE
#REPLACE <J48203>  
#ENDREPLACE
#REPLACE <J48204>  
#ENDREPLACE
#REPLACE <J48205>  
#ENDREPLACE
#REPLACE <J48207>  
#ENDREPLACE
#REPLACE <J48208>  
#ENDREPLACE
#REPLACE <J48209>  
#ENDREPLACE
#REPLACE <J48210>  
#ENDREPLACE
#REPLACE <J48400>  
#ENDREPLACE
#REPLACE <J49202>  
#ENDREPLACE
#REPLACE <J49203b> 
#ENDREPLACE
#REPLACE <J49204>  
#ENDREPLACE
#REPLACE <J49205>  
#ENDREPLACE
#REPLACE <J49206>  
#ENDREPLACE
#REPLACE <J49207>  
#ENDREPLACE
#REPLACE <J40200>  
#ENDREPLACE
#REPLACE <J40201>  
#ENDREPLACE
#REPLACE <J40202>  
#ENDREPLACE
#REPLACE <J40203b> 
#ENDREPLACE
#REPLACE <J40204>  
#ENDREPLACE
#REPLACE <J40206>  
#ENDREPLACE
#REPLACE <J40207>  
#ENDREPLACE
#REPLACE <J40208>  
#ENDREPLACE
#REPLACE <J40214>  
#ENDREPLACE
#REPLACE <J40215>  
#ENDREPLACE
#REPLACE <J6000>   
#ENDREPLACE
#REPLACE <J6100>   
#ENDREPLACE
#REPLACE <J6101>   
#ENDREPLACE
#REPLACE <J6200>   
#ENDREPLACE
#REPLACE <J6201>   
#ENDREPLACE
#REPLACE <J6300>   
#ENDREPLACE
#REPLACE <J6301a>  
#ENDREPLACE
#REPLACE <J6301b>  
#ENDREPLACE
#REPLACE <J6401>   
#ENDREPLACE
#REPLACE <J6402>   
#ENDREPLACE
#REPLACE <J6500>   
#ENDREPLACE
#REPLACE <J6501>   
#ENDREPLACE
#REPLACE <J7000>   
#ENDREPLACE
#REPLACE <J7300>   
#ENDREPLACE
#REPLACE <J7400>   
#ENDREPLACE
#REPLACE <J7401>   
#ENDREPLACE
#REPLACE <J7402>   
#ENDREPLACE
#REPLACE <J7500>   
#ENDREPLACE
#REPLACE <J7600>   
#ENDREPLACE
#REPLACE <J7601>   
#ENDREPLACE
#REPLACE <J7602>   
#ENDREPLACE
#REPLACE <J7603>   
#ENDREPLACE
#REPLACE <J7604>   
#ENDREPLACE
#REPLACE <HET201>  
#ENDREPLACE
#REPLACE <HET410>  
#ENDREPLACE
#REPLACE <HET420>  
#ENDREPLACE
#REPLACE <HET421>  
#ENDREPLACE
#REPLACE <HET422>  
#ENDREPLACE
#REPLACE <HET510>  
#ENDREPLACE
#REPLACE <HET540>  
#ENDREPLACE
#REPLACE <HET541>  
#ENDREPLACE
#REPLACE <HET542>  
#ENDREPLACE
#REPLACE <HET543>  
#ENDREPLACE
