# Supplementary material for: Oxidation of low-molecular weight organic compounds in clouddroplets: development of the JAMOC chemical mechanism inCAABA/MECCA (version 4.5.0gmdd)
Source: Copernicus journal article supplement (doi:10.5194/gmd-2020-337), 2020-10-29
Supplement: Supplementary file 20 [file gmd-2020-337-supplement.zip › caaba_4.5.0gmdd/skeleton/targets.txt]

# ----------------------------------------------------------------------------
# TARGET SPECIES
# ----------------------------------------------------------------------------
# name    abstol      reltol
#         [mol/mol]   [1]
# ----------------------------------------------------------------------------
  HCHO    1E-12       0.2
  NO      1E-12       0.2
  OH      1E-15       0.2
  HO2     1E-15       0.2
  O3      1E-12       0.2
# ----------------------------------------------------------------------------
