# Supplementary material for: Oxidation of low-molecular weight organic compounds in clouddroplets: development of the JAMOC chemical mechanism inCAABA/MECCA (version 4.5.0gmdd)
Source: Copernicus journal article supplement (doi:10.5194/gmd-2020-337), 2020-10-29
Supplement: Supplementary file 20 [file gmd-2020-337-supplement.zip › caaba_4.5.0gmdd/testsuite/radjimt-00/caaba_mecca_a_end.dat]

 1.2341055968965262E+7
 1.8364207511631677E+9
 37.92000769618974
 819.4279345150459
 2.6580480329323266E+7
 877.5884773449618
 120.93305589307664
 4.189053539938418
 1093838.01059198
 283987.7087237567
 1999.6047884514815
 8289020.970131389
 0.5617118935303497
 0.053830721551079035
 0.012482485752236835
 476641.365656442
 5479284.387306729
 4415011.98265949
 1647044.1623768362
 2.5885565374692347E+14
 2.5885565369090597E+14
 3.614307011462176E+7
 37.08209673672877
 23.70822508518354
 1.567911530023746E+8
 7225.371585781194
 2154818.0741672073
 781647.6053930426
 364829.89907130686
 363087.0019452944
 63122.824018267056
 2.022915655500973E+7
 872126.4390327318
 2.9224060402071588E+7
 46696.40670374527
 1280.8576022967584
 170465.96172573906
 2.9164285618503157E+7
 32897.57520866288
 159697.3266699284
 91324.3766754015
 4035.4622358733495
 634.042260906645
 581.2797304575995
 4268.773039011613
 35314.80865894527
 23543.205772630183
 4.798526291143937
 118898.22497006608
 153.39764346875359
 174.47152846839785
 1829.3243324469781
 46593.732360648915
 3.27367072570566
 45033.42590966462
 458.49476312552304
 707536.9137491565
 872419.9383728888
 783083.3445002049
 90826.57125793025
 2623008.5977713563
 1884.4562800991912
 2175.8957096313643
 11344.106509965899
 23520.217279138826
 587298.7312001049
 2471948.949031093
 413.20837563381167
 2.449004811869296E+7
 106156.3420505675
 1.1931875265331986E-16
 4.698944332367963
 1.2473661501687072E+7
 1.2473572037668949E+7
 3.9821324396315467
 79.77705811702187
 2915471.248003053
 192.18225593844653
 1.9831780658939255
 34.76485058259699
 2.691305634237137
 5490.742025918403
 0.020543388238909246
 6679329.168093566
 6690621.656290731
 2181.9145094767564
 1590.6070222550516
 1.8124095282431496
 112.10076601662514
 15179.28415555966
 53038.93412640437
 78823.80409794081
 2.300970944798558
 146.20806441947343
 42335.84461892446
 0.004278381342461917
 2.8857850930832405
 30.7638083169333
 174.60245939756246
 3.9350802443695367
 40.34992257613229
 0.022480495652832985
 0.16541102595598797
 137.512394063854
 5.9353409366707645E-8
 3267663.334882308
 10.976880579435441
 0.000004199713700475849
 59.037177920349706
 0.00042014200096921037
 193.5542698407622
 292.8475908758463
 105941.04707959737
 4382.331389817478
 0.5722840361782663
 0.6445687244278523
 0.6789375854173454
 0.04461289591034648
 3287.2577560701066
 1095.7525853567022
 3288.296343868201
 302929.26918293163
 104654.49051398778
 692986.854545956
 155922.99159612032
 360972.9651618866
 498.70362101341203
 1891.7928830268638
 58557.12222689606
 59127.72350665575
 611889.9495807077
 32204.7350724624
 239.77825140750232
 607645.9520018873
 383484.061395386
 144592.35025008
 100585.97870970806
 1169709.5047900658
 4940076.948965745
 1257.2006211825162
 169325.37617517408
 18813.931464878846
 99808.81536516988
 10931.353599450675
 5203500.635098747
 70731.7549831307
 28890.435175771312
 654182.2652324701
 163545.56630811753
 747189.7450352822
 19898.084074932718
 165439.17874003638
 599.9828989478974
 56077.740067196944
 6230.860265374804
 177787.24955226757
 54109.16140480933
 25766.268524031846
 387388.27602477366
 1636071.0799157189
 416.363880536145
 20446.391137940693
 23089.194913829742
 19133.61772623498
 1573503.8716189347
 98528.59401361355
 213218.33618499167
 122.95376635626866
 136170.8253987353
 41863.45432388558
 47661.211280264375
 1072.4740163135384
 119.16378452283409
 4927.740141541924
 7408.712615080847
 7.962864456937986
 31289.487057593284
 32561.04280928432
 2960.270619104991
 12888.556402209517
 14726.930679648878
 444453.0302157612
 19152.213170680665
 312065.6694168129
 34673.96384262623
 19711.906404946712
 128971.6988301463
 167994.6885827412
 85220.02126961062
 131337.60046738532
 268671.3635461642
 3672.525427318018
 15828.3439861447
 52800.20117070377
 9317.682668433437
 111842.685354413
 884.8183342721404
 176.28252611053466
 49417.81703066679
 51179.11955668963
 27444.649525909146
 46.938900898378506
 1512.8426495366946
 1.6259992239966483
 694.3011709763091
 100.62335995960153
 218.996810471009
 24.332979948416696
 312.09417105118075
 18.515993720678004
 773.7280010114761
 128.48876552127456
 2898494.0207591397
 2898493.0134253968
 59.36977272808284
 1.1676230073818747
 65.69970138878503
 72.71570534544045
 7168.524691870577
 2611.1716462015415
 3925.8199011487386
 631.4397306391431
 1914225.6091459051
 1914208.3712578553
 0.9468366788844118
 1590371.0442986488
 8335.327710777121
 32268.314758232078
 1518.808421001797
 2278.212688082717
 0.03810180533062926
 0.14036478021071938
 0.6988133103843811
 979.2935994766376
 539.634448144725
 12918.55981367616
 7210.359038493549
 65134.530860259314
 23615.105335575223
 146647.5094437971
 39459.533649058874
 1612.1595679175032
 1216.1905867271284
 9871.392177833606
 8.66010739239225
 80375.31241529311
 88188.70144301286
 21923.939711899642
 49092.534319340455
 39458.93860435417
 56136.74491898752
 22361.5370070556
 3946.1536355998264
 46577.005537205674
 635.3798132596165
 7161.702281594223
 11273.658907716117
 8309.965014936695
 440309.5526351125
 280404.2978043961
 79.76090048056324
 150.50191187226181
 5643.105619401857
 627.0117458704319
 7868.599527164281
 599.8278727207614
 13.242870864577155
 4982.470317422328
 17581.7153403424
 344.93978575066745
 465.8760534755278
 0.7285338969970984
 802.2959133367585
 359.30348983108775
 278.3803202847665
 728.0580847003904
 82.29867254817766
 0.07057150373620699
 1.2350118020933956
 612.0733907743314
 4359.1108126444715
 2743.403880978698
 484.13010230141765
 6.816748712637763
 882.0805883213817
 341.63573877859017
 463.4778585412336
 1.0565489182153507
 2.3236374990981257
 10.414888523333548
 1.8379215255978136
 16.548658215921876
 22.910192831389637
 31.08096111437809
 23.379328048039635
 2669.885294241702
 14578.093327532557
 356559.9825873455
 356558.3026135572
 0.1477826880837799
 53137.29842296167
 53.38485364365631
 7140.272507452991
 22637.313997186444
 49325.41599741332
 208317.83410249435
 230467.1437030007
 5532.1032238750695
 3017.7011686815154
 1006.0854349614322
 5072.61674340656
 1521.0735146334814
 23.99826613078423
 13943.02724172719
 9.157166593850148
 886.2512708588016
 6122.275104727075
 25856.428451880638
 2809.7454653019495
 11845.042413646046
 17418.590363117855
 72.13570020652156
 8.015078132485645
 498.3175946348565
 228.6969431877368
 33.144485128378676
 2104.5629298887598
 45.20787419350578
 2076.308253799245
 655.7306098238
 1858.6259915741493
 3638.0613249083144
 5.689176283642378
 64.65606411347022
 4820.220996847835
 10502.986613099794
 44357.64764686791
 12.27633265131916
 1689.3294152239796
 36486.164265628715
 7475.467027828138
 53373.959827832005
 170.77170599465057
 53126.15709497063
 89.4114427748922
 10905.027861888993
 51588.428244658
 19683.763307974055
 8784.176910900784
 19833.98960811808
 614.8037997157991
 7.706959434520546
 426.66040823871873
 47.406713988788404
 1352.671851303459
 411.68272592238657
 196.03940233822954
 3395.045176854517
 12447.840337858574
 3.1678520395532836
 855.0533166205893
 4845.302070888732
 6205.550151187161
 209.22455267467765
 10.031382335491436
 8388.39107466693
 14256.60232311459
 5542.7576149274855
 15060.252551651307
 1472.6518264306562
 981.6586765082477
 372.6286814003271
 1380.6519311036864
 4984.744159342701
 32778.46858208156
 40891.13263849255
 1604.902789793151
 66.45501966999478
 33925.77665713741
 68256.67586743853
 14241.401464365308
 1528.6582270991803
 16.87332065939051
 1359.632908838099
 3879.4867573638835
 562.2444679098106
 8453.180363501302
 9.08545559286431
 546.8111957428665
 1955.929991639803
 1550.8459471622261
 4840.559234634436
 3979.849171287538
 172.42296863188963
 4007.7550451193115
 216.94976522002605
 10938.782748787273
 4669.774852226084
 7040.635213760587
 9.755548778541893
 2438.2822676902756
 2743.8696036507326
 4.290845172845009
 48.76438112738929
 9.982586300710576
 2807.726734613686
 4.390704532699267
 394.2397651002095
 2438.2807954283294
 2745.9964200737763
 4.294171074327428
 2440.17221856988
 48.802179165059634
 1.9230201107139382
 1696.6219106259634
 1507.6675342552687
 2.6531661437797522
 1283.9715851164212
 1655.2292733584948
 17.469141192833504
 1.0521002249541413
 2.136082243235147
 0.3480420675566053
 0.017625913124661514
 2.0728346433475457
 13.847142894348487
 1.7036619232819146
 0.02431824591693604
 700.0267486309933
 645.4504705851039
 91.27998236023548
 68.86033957949842
 0.7153298535872841
 13.655570280809794
 580.3767992086322
 102.41943635145937
 684.1918504540837
 84.17849174605918
 1.2015724688229101
 816.2387676962397
 2357.782656046214
 2386.2613454574775
 0.000004395316442521711
 0.000008913710288156246
 8.26128521320047E-8
 2.23606567601774E-9
 5.818346407551713E-9
 3.8831433915089145E-11
 6.994963983375264E-8
 5.246359205392108E-7
 0.0000035047217020081707
 4.3119804287193613E-7
 6.154965314515688E-9
 3369.631713800357
 8301.66851326835
 306.8313089459348
 3289.601493356197
 8104.5002712761425
 126.07282978903604
 10707.928406873129
 12.461765245704637
 8773.79065857884
 10.240741168753933
 416.49040404418423
 2966.193026844137
 433.6228452739281
 2744.271506084648
 3088.208149437675
 2978.695174482597
 7308.631354460931
 10.12386642918871
 698.4139805723185
 2281.62116021719
 4342.215687625514
 458.32435514958803
 0.7032245369726465
 80216.21503764263
 71943.11521516007
 157.79781970728408
 43088.94064591577
 1716.181598210132
 789.2682719046143
 1657.4632945531018
 5445.950976173223
 11866.41654723923
 50115.87117295694
 13.869966922678282
 1908.6272567032677
 1582.635280861569
 400.044902712723
 72894.06004116655
 1479.5246893073095
 1825.8591639822414
 877.0596809175166
 1911.0630183948492
 8071.0623676497235
 2.233730861104576
 307.38066135345935
 12962.073738708794
 3.12405772817296
 295.4084614497983
 6918.984271859196
 26517.310881311096
 40968.87142688273
 15812.305240996211
 28014.98879698697
 9338.32997006754
 42034.770673817875
 65.73369689194496
 747.047007996733
 623.8752465295529
 1212.551628123199
 213.97970908384607
 1605.3169998752785
 2.510384127086845
 28.52988710106349
 15945.9413100753
 7.805196157615929
 7180.546534952391
 3536.0878717892374
 26528.412427235115
 41.484956229404226
 3724.919150735529
 70.97927027138289
 51997.19500748518
 40526.93870876735
 13508.980106387742
 60808.18332927998
 95.09143567200204
 1080.6903591875712
 210.62934401012743
 948.1091588133683
 1.4826468437172586
 16.849910181310744
 6381.060710795567
 3979.241690018737
 0.22719119994160142
 2.246699127899853
 0.042615118355560554
 49.01188558266038
 265.88727481868585
 1.5103014289613517
 6.682749916498257
 48.44067637850068
 265.042939659417
 1.3731084936968374
 6.145874078528132
 0.12010472362922904
 0.24020946097489781
 0.04001273059491684
 0.08002546142845304
 0.17740848645220325
 0.03676589738311496
 0.0003349244875937653
 0.01451651395786112
 0.00300838293143924
 0.000027405318066868585
 0.12387268799830148
 3.5040890922862875
 0.38934323892255
 3.2101775176737113
 0.6652728939670666
 0.006060403770377472
 70.87227026502904
 6.969043236506118
 4.397412473532217
 12.51861741413726
 32281.814807235914
 0.2435332392243132
 0.027059249250717277
 0.22310646469723697
 0.04623628525672654
 0.00042119641434239046
 0.4046869520386245
 0.02259051061124428
 0.2349173468678775
 0.014460642440589191
 0.04057973956177606
 6742.936914856732
 0.0007645682986181909
 0.02119887646518893
 0.021100968896981136
 0.00003299755586544599
 0.6416095341132474
 262.6441542479859
 380.4041517588294
 0.35619603068320166
 1490.7866646167108
 1943.2886253951326
 2.374180992410442
 3169.699979249434
 24.34052200114737
 16.67814780398084
 40.25019121446986
 0.037688753602046536
 2.4579957253225926
 7.7927587469232025
 16.97997682089149
 0.01825003356608566
 742.4257062446827
 79.58933804712754
 3.6449497704792195
 484.612392959124
 2746.1368613404265
 3215.8278581029595
 5.02889037557851
 5706.837149039625
 91854.96139187772
 0.1041683762266039
 0.025224553523482192
 0.08006968626762255
 0.04277004453971673
 0.06535772187001179
 0.056476380634760584
 0.06698034743747786
 0.01317839188372913
 11.626892663358221
 9.928715072619514
 1.7521262097632195
 0.31251968175494327
 0.1681618307053533
 25.20077112525941
 33.58996630030978
 23.54488400058139
 275.6770355992938
 0.00021745312284322872
 0.012235631831967181
 0.012292404625861264
 0.0011458944044041711
 0.057126948760168945
 24.760146119729782
 1428.0466642907202
 6352.3618538535975
 7.996722000713718
 107.33145775617724
 608.2115868433898
 712.2382690123015
 0.8072797518130673
 208.8028874294952
 208.8028874294952
 0.062351890430901495
 0.06271887030662113
 19322.453191116765
 19757.67802747341
 0.038169162665998714
 1.5306318147181726E-9
 8.652506634114541E-9
 6.536504089451865E-8
 1.3468240510280183E-10
 0.04247199601258594
 66136.10911112715
 25719.59707515613
 512.2827257816671
 26062.94087592858
 2895.882367494297
 28825.07615703465
 45.0764638088996
 31637.408264450863
 23803.36266279941
 17.49532088884433
 0.010045251658340918
 0.059260061231055226
 0.012280975807349987
 0.06468568576806798
 0.007187298537673211
 0.00011187540145061554
 0.005335182581799001
 0.07660399579203334
 0.06588711647465477
 0.11218616899976462
 0.005381212612916888
 0.009162605072398142
 0.1125805603704469
 0.07281367148885609
 0.00164420760111055
 0.09251611841424098
 0.0929453891372199
 252.46428017785883
 720.364905329043
 323.6421996724253
 1569.6340400503598
 6629.092871188072
 1.6870384582707414
 3135.7264179009703
 5533.447459772156
 231.95952791079964
 13051.876865799804
 11145.571763282378
 1966.865628272248
 10420.95921082746
 2261.6601485296073
 1.0979649140376264
 329.939718550474
 2051.318360904814
 8663.407887341065
 941.428205013644
 9722.938777419593
 212.42675626476998
 16.164941054098048
 820.3384817102304
 816.5497268682739
 811.7044057648654
 7.518136540477339
 423.0297986479553
 361.24375270443204
 63.7488982811214
 11301.48403126932
 5.486515271075347
 357.7315872138042
 403.05457315290755
 1666.7381259387228
 10583.224667289056
 2505.8918337797195
 101.50494981631081
 444.54236406570465
 52.742711300827686
 0.7776511180871553
 0.26591426655782574
 56.69499546560139
 1843.101772551722
 1993.9016865742833
 10038.982887255905
 0.22740711204553454
 121.15734027604144
 693.6612657326675
 122.41081732243387
 812.303032687484
 1.2702741201903405
 0.920697214900184
 921.2158078779728
 38489.7080865562
 10122.498376143472
 3907.6615400881988
 4816.41259297513
 698.0308233895104
 10494.68831828749
 44322.60115476871
 12.266633255203825
 1687.9946945355673
 12087.613636818272
 0.5414215144199181
 74.46748508727961
 2079.574336824238
 872.8274201801977
 240.68265803667558
 18700.360955752538
 9377.972638915377
 20434.067473038253
 86299.9448014952
 23.884197796238286
 3286.6719273754316
 9.841648043535749
 21613.809052382014
 47.51867058012223
 757.2268450460514
 97794.0788074199
 3749.340681639184
 14928.096567677607
 23.344458866397744
 16.92011032896091
 3934.9372742839805
 694.4007279242373
 4607.957282953948
 7.205893180175971
 81.89317191521255
 437.9602904746084
 631.7935664735282
 0.9879946085377262
 11.22831137032027
 67.89523646390184
 3282.398302894685
 418.4942880522363
 585.044139128445
 2914.181643489938
 514.2673728925167
 3129.7397385756117
 4.894266342562601
 55.62211164786235
 2166.837429958631
 183.272317476412
 569.0748415785988
 39869.11124523868
 1277.0727453435175
 12504.717038718181
 22866.885453396786
 9476.230846097544
 244.16192508224177
 532.0149080808657
 2246.8780266841645
 0.6218414083205344
 85.57074922267626
 1.3750964705111834
 94.5658541303759
 2589.726873460042
 899.7055828565432
 8213.17237115067
 12.843704735679466
 356.22388500062874
 5352.183587721267
 594.6870751485051
 5428.739743486613
 8.489427373654623
 235.45673640978086
 167123.2497556624
 1911.5796124734572
 356.3744438751255
 19313.044139014466
 537799.3118021279
 16812.812415660166
 1868.0902993363677
 17053.298240754
 26.66783521347679
 739.6401630061852
 13628.462665106637
 757.9115190183721
 21105.129279520494
 24426.339675768486
 66834.16021602199
 578.2117463142955
 2752.935432501712
 887.8504033634855
 8104.949598587371
 12.674466678365338
 351.53001827704065
 3091.846631590955
 18.27818128458032
 39.827114455810204
 0.046551607044026104
 6.405903239920001
 3979.2027435645973
 17122.7116473645
 6.222650982130688
 2.1278072306110487
 5317.750834108131
 15949.303746700689
 444131.15389568196
 582.9739218845023
 2128.725364479088
 3.328886672433323
 37.831963607485044
 20516.294395728073
 18267.44420664589
 58259.19283346773
 2490.459138863555
 80.26371568972888
 488.4706940418359
 0.7638672467587337
 8.68116001654155
 101731.65608139952
 92868.11767876837
 399616.23036643595
 145.2265493677113
 1650.4633744421744
 47083.620963444315
 227.67828330688155
 496.09799285748556
 0.5798602066553338
 79.7937732418362
 87433.37689322601
 79815.59965833317
 343450.58193412394
 124.81510785207217
 42.67995903029088
 18283.269053383512
 12188.846338302279
 2136.4509762103507
 25680.73108019675
 43.500325667836826
 494.37031041263646
 269.01197357233065
 1537.412996007578
 27.323088964492218
 1895.5589644048648
 2211.19520952301
 1.0136161262537553
 1896.572242657156
 76879.04467637886
 4216.307342380517
 1338.4283863549567
 4214.099991917443
 8.683007223556004
 289.26413001733937
 13756.463499371032
 14187.445878977094
 29926.289672440333
 19950.860277111857
 39193.893451702745
 3563.5611134390533
 66.86382519048156
 759.8906331691013
 0.5128312003617216
 176.3378734447732
 2538.449165593565
 4906.348539983724
 3273.270697965023
 2.3201424739513574
 3889.77278883598
 427.6464929771757
 3666.0224650845626
 5.7329017300677
 159.00369625738708
 6546.953173500461
 727.4392535441507
 6236.011961448575
 9.751834338987544
 270.46996062331283
 5154.068934127475
 143522.41447815226
 7625.80217760901
 2785.730692689433
 31760.35591212197
 3938.5638372042163
 38631.12136839236
 73.11995283451307
 159.3242065609845
 672.8797509304986
 0.18622483596338452
 25.626146030215374
 410.6209111370878
 1315.1256828570647
 2.2018647040861934
 25.023641100015006
 1101.611394366015
 826.2085662936222
 6293.198066082594
 26578.29364831067
 7.355754676818257
 1012.2153822041605
 6823.6514442208845
 252.97881893854154
 702.7006677154595
 31128.007935098194
 26684.65191644905
 114825.41343604504
 41.72928251123971
 14.269138556960165
 11263.89222611742
 313659.1747948239
 599.4163649288622
 143.62341955630507
 0.023149103794253313
 456.99804993249273
 3536.8880368770065
 31925.16732268392
 202.01250429777707
 1442.7085147367013
 959.2799288226043
 26712.520399837755
 29180.58368968696
 5171.112103315803
 68849.17229831783
 59021.322576980456
 253971.75079006245
 92.29715462331465
 1048.9340546493477
 168.26154617464962
 29.693215418940905
 169.69778211770932
 0.26537227143501063
 3.0158894258861424
 321.0845409906095
 1101.0057533529787
 1.7217455289287722
 19.567206877658606
 5035.830221316762
 21669.43338691204
 7.87499805663306
 2.692819805267983
 3620.437807011103
 402.2708741060148
 3448.4886132354263
 5.392723728571073
 149.56876048311284
 69303.71388421497
 168.8650058161311
 2455.416690277159
 143.13525661429657
 126.31703653464047
 275.23761765225305
 1162.4211010375386
 0.32170930773550904
 44.269979654757854
 1035.9435461192209
 165.10909262577314
 1.2190859584990699
 17865.815208672266
 14618.451811553101
 21491.74818968437
 1.2266851717882716
 14709.576422167665
 17977.182368149122
 15483.93331258969
 32.85799520468753
 2028.481408555675
 1659.7763592230863
 1.685279080391899
 1486.8702606812246
 1817.1657066726596
 1612.8738371371317
 0.1378346238691381
 1652.819305273033
 879.3691620951915
 546.089497151894
 173.4419415486708
 1.1251985139347527
 0.06000434826656927
 968.1308103592846
 230.55406394716783
 833.3132921551918
 452.06524650261457
 229.7816249115814
 1.0662676363827264
 0.05686169489785766
 866.7763216113392
 249.58097277464697
 1300.8193798866173
 327.6378240085106
 846.6680527957627
 3023.3508118701634
 0.4074409986606713
 61998.507545082044
 3.422882138410983
 0.1496737902273528
 0.5846956242971054
 1.7970286957696617
 34.15234948068145
 27.944679226969654
 0.04369970490150444
 0.014942915540661024
 61.86117580868817
 0.19810057335438408
 1.6209300322684215
 0.002534799684075579
 0.0008667632350609221
 96.95881178335439
 6198.9803054697295
 3247.2076846773757
 1650.5331121626618
 3177.111661803734
 2355.506237445402
 4955.151195784525
 0.2755611074273935
 3304.3418652981163
 3554.9080350052586
 627.3367193915518
 3547.817345601079
 0.19935955439936323
 1544.706215739235
 845.8783192084816
 3025.7188090195723
 957.7190585568062
 15119.693807832884
 28.574462066028044
 963.5430753318135
 5990.590070920699
 25300.278230508015
 2749.310182624123
 19853.762422519918
 9175.797993164264
 284.8469696171188
 903.0706160919162
 8310.425645430152
 1967.7393625105194
 4052.3100585843767
 7150.893225848707
 335.8038363833545
 1064.6227966418917
 2319.7523492061664
 9797.094971609435
 9675.236936128027
 4328.69862524003
 763.8880016171174
 4023.592157319444
 564.9623973035666
 0.04260421769923627
 0.0007619741934174925
 5.298460026420819E-7
 5.045410059599059E-7
 10992.18946310379
 34.33333315139313
 7.846433102013975
 5.853688094336492
 121.10076214363782
 0.020322705372418627
 0.00008672718326876424
 1.84743837015429E-11
 9.828658382053765E-12
 3.6787181550661004E-12
 0.00006505366990949184
 116.26294736316615
 5.114869539044145
 2.235034447376185
 2.9050098756019653
 0.0025332787249323437
 1651.7843066045236
 2177.447857040373
 3.309114064898727
 582.8051616834002
 64.75613175632654
 267.78387066119336
 1847.7086736447648
 17003.371910373728
 4026.051809012516
 4.327189691029311
 22034.44354148944
 5647.291884741111
 2255.603393972785
 1717.6492295939925
 1115.7677510064987
 0.11020569442780771
 2334.68672198328
 3893.3570973719243
 1681.963947075547
 0.24980078305785847
 4214.368048097463
 0.00014790455382513815
 0.000008774964213269923
 9.416386673593673E-8
 6.547774034129435E-11
 6.235057887582963E-11
 0.0000030273629410624904
 0.00001013508419386472
 1.412458109546108E-7
 9.821661805708294E-11
 9.35258754985363E-11
 0.0000037969052298898245
 0.00002704108835912686
 0.000029874902542115204
 0.000005272041686694479
 11.577494791643453
 27.976225969374564
 0.00003326712141167599
 0.3054837794209513
 1265.6660059349892
 1645.0628985925384
 1.9792401449305372
 2912.097316591066
 0.12062069103893061
 0.22122268800838513
 999.7208398182054
 176.4213267356696
 590.6541378894541
 314.23716764283733
 1.0256405199357432
 2080.6824778507566
 2366.9016791196877
 0.08904813216358207
 0.04971593858719115
 0.18036008186941255
 0.00015728082787744773
 0.004204936352927908
 0.030341502153352667
 0.023333274079408304
 0.02234387772410648
 0.03671989194944108
 979.8232831726402
 753.8490001787998
 1.1788640900309266
 0.044006349577918547
 0.01885986517542749
 1734.263446520221
 1132.2250464388721
 6.552411502918887E-14
 1.3104823354239984E-14
 8.736548612491482E-15
 2.0065366989492932E-14
 1.7835881563528514E-14
 7.357301536845217E-14
 1.3376910711599674E-14
 9.809734398893971E-14
 3.0723573529015596E-14
 0.03292740662054247
 0.060390048664125784
 0.0011478764373988749
 0.008282716425153434
 0.006369588805897895
 0.006099500350763848
 0.010023908857323604
 0.0190574174097808
 0.034951989327675154
 0.0006643572223727738
 0.004793793389805564
 0.003686531223109839
 0.0035302119451791803
 0.005801544511933617
 0.014436635882889449
 0.000002131983264264146
 4507.7465942915405
 0.06128962555923546
 0.000016029785869667215
 0.7965531198691632
 2089.8943648595614
 2629.463771137435
 0.22747148750514534
 1.6730958266558489
 1161.8393799653709
 17939.23667993224
 0.14946094474133323
 0.03373196370148521
 6.647004395780052
 3039.651697970191
 391.1131930226526
 1.2532645940907157
 5472.531586224453
 6783.839544187511
 295.19681442638904
 0.03707573361172806
 142391.35480333416
 94.36603226704992
 55.46378537962599
 76.26670035263635
 62.439610502743236
 83.78874056582603
 86.84778245893045
 86.9099927689259
 43.61431286241963
 0.00006198226092778267
 7.659694263159803E-9
 1.1489542277382814E-8
 9.449722861041967E-17
 5.289981897743878E+7
 1.6019383934045029E+9
 0.
 1171676.0137837743
 2.6458330560302404E-19
 1.8369939355018535E+8
 2302409.55180268
 284358.25445180706
 1439.8478759249258
 97630.07582552353
 91354.97313075069
 25067.257488867872
 63276.17471332523
 3199541.5474056825
 1806830.2568753585
 16.412714232845012
 0.
 34.80643652956746
 515.8924974276395
 97.65390419622473
 2725.7195183641225
 9.027796470345474E-9
 2.4782309301000474E-20
 10515.00778016757
 28821.748289493946
 59895.461630093196
 2205.2064014436014
 44963.628352443564
 146287.69659301176
 12337.516880737929
 17625.02430293513
 4146.0894067846075
 13596.701193303921
 456419.85799374315
 25596.35160386215
 1357.554981332845
 23159.23947501513
 11437.510020204445
 31.498232891642477
 100.06743071228485
 23.072519921407082
 12652.671158103263
 22662.591468363804
 7.118185527720524
 3936.846413819562
 23054.56624794287
 42215.79799333507
 426878.4812171951
 2837.446669028692
 7.822710471029194
 38431.31847915508
 894.6941406913269
 144.06698023930264
 108.21690377146308
 116.6518977247285
 1620.1504369205222
 1120.8324661377906
 5542.724703010466
 817.0864720866299
 6325.93027554893
 9305.08861600137
 1.659297852830754
 4601.253037136289
 4423.5820232199785
 1991.4745329351297
 48.29231736559531
 6.335453509576951
 2351.66347580088
 23457.214851966302
 75.9043754774834
 261.020991544636
 7989.627482547746
 66.91232996143285
 8538.716911518422
 1559.4631984351788
 183.25092626597987
 76835.77932457183
 10358.731115624725
 3583.553112802226
 3583.553112802226
 647.0100341554447
 1391.0716351378912
 530.272019201601
 117.27626339743446
 371.7468229264285
 4657.291391120311
 25640.41003903952
 19455.65506471874
 2522.8457606359902
 146.57067605788487
 1776.4616073792606
 327.77531205273823
 2769.6987467329295
 2703.9171954859075
 928.1658503640275
 892.3260114363022
 762.741557704327
 733.2893487473998
 1299.3273434545745
 1090.8015763325545
 265.6649874725855
 18.148875263715198
 50.65331490009052
 40244.47059268523
 631.4575124258128
 1100.1673261576764
 171.35266515908384
 1587.7950468051652
 32652.657627902357
 0.0003307981152350045
 1.2514198284581641
 3213.969062901515
 0.004056541472697008
 130.1231430130006
 0.0069124846691440076
 27.25906931780787
 132.73115311589078
 0.6006828087610621
 9.746999117869548
 915.0761987571091
 394.2961963912597
 58.64305932493395
 1579.578607858466
 22.77577979716516
 293.03854468868906
 10.983792245735042
 261.6320358203658
 5.1132314040073075
 0.07580668002763921
 0.07580668002763921
 0.0505377866850928
 0.0505377866850928
 375.447240669337
 18.197701050908204
 8.455833518934165
 4274.331355008484
 18.712663203814543
 161.0852200847349
 17313.393729811876
 80.06291660327074
 806.4811670166475
 593.234980556679
 78.32386008260424
 222.28725728544774
 14492.788009505928
 525.6491739338119
 189.25336773564047
 3634.6113148467534
 13.55232586129162
 19935.61320455626
 20631.15500332397
 17044.461618481597
 2447.241010240398
 69.25753982748446
 77.84095826715533
 112.05570429630443
 207.48361596147558
 10461.509080595197
 872.7245128246119
 14513.358781583931
 1520.322543507019
 1626.9168725968832
 12.956391446699293
 12713.190527026549
 265.585975025398
 146.22680405446593
 10798.63473464157
 365.60229803541154
 25.115120384738038
 215.48433851028256
 29.11678626097942
 70.76746628661024
 5296.481680201836
 0.029204889353630862
 696.3725184667942
 6736.954893383886
 12192.727648689686
 375.14851096086284
 2.189104452316759
 440.9152058698464
 64.55177247998242
 1271.9174395733862
 164.20050905617606
 76.00174224643172
 25.522872452007306
 29.41828131967698
 15.201091570605598
 2591.287349990369
 592.8530729931203
 525.5396363246989
 2221.6429841472614
 1292.6744961360198
 2019.6320185927782
 183.2963949902554
 115.95897802119418
 240.5983457244796
 149.1065267978253
 0.5998241982878904
 11.930272880586545
 368.4530193841478
 173.60201244326822
 200.88622055206
 2974.3834349191166
 1255.0308711705372
 213.298721861596
 1.2324213472709396E-22
 3649.7795493013705
 3021.9255214516957
 6712.345705089505
