# Supplementary material for: Oxidation of low-molecular weight organic compounds in clouddroplets: development of the JAMOC chemical mechanism inCAABA/MECCA (version 4.5.0gmdd)
Source: Copernicus journal article supplement (doi:10.5194/gmd-2020-337), 2020-10-29
Supplement: Supplementary file 20 [file gmd-2020-337-supplement.zip › caaba_4.5.0gmdd/testsuite/traject/caaba_mecca_a_end.dat]

   277428.548431412     
   321849406.892601     
   401648.413291074     
   45364.0636442472     
   42323.6542929599     
   257516.706606991     
   11270.4333295698     
   102442.310843897     
   108155.507280462     
   51930.5794125550     
   318513260334920.     
   318513260334505.     
   812046.740699284     
   1368557.98999122     
   10277.8053751098     
   117.266662040576     
   29.1357731869109     
   29.1232958771404     
   413.956220742651     
   98506.1983591956     
   3003.18563247778     
   76417.8205531437     
   26.0630288749747     
   1.95824401094675     
   100.516480013280     
   76178.8092347662     
   9.88374747099595     
  0.000000000000000E+000
  0.000000000000000E+000
  0.000000000000000E+000
  0.000000000000000E+000
  0.000000000000000E+000
  0.000000000000000E+000
  0.000000000000000E+000
  0.000000000000000E+000
  0.000000000000000E+000
  0.000000000000000E+000
  1.272706398887489E-006
  0.000000000000000E+000
  1.680669620727940E-006
  0.000000000000000E+000
  0.000000000000000E+000
  2.600437504052715E-003
   141914.252756576     
   152.896277646170     
   67747.7750931496     
   7523.29942772091     
   62082.6931904738     
   47.6673477218756     
   5.92313597165135     
   2063.38928323043     
   4071.10994424664     
   48830.9462734864     
   32858.8775435663     
  0.138197106264376     
   329690.315040761     
  0.333861907783016     
   155867.534141916     
   155824.167342989     
  5.849898426593489E-003
  0.114412010742261     
   83766.1226303730     
  9.814251083046889E-002
  1.056724956954199E-003
  3.349076632672326E-002
  2.624434346793661E-003
   848.029996848557     
  8.410409554564864E-006
   66205.1294017217     
   66203.9090003423     
   2.05419802769309     
  0.435665151603284     
  5.709099765073333E-005
  0.229813899790507     
  8.560891525533718E-002
  0.441177939342625     
   1.57155282850283     
  4.750631769657734E-002
   9175.92698531632     
  0.000000000000000E+000
  0.000000000000000E+000
  0.000000000000000E+000
  0.000000000000000E+000
  0.000000000000000E+000
  0.000000000000000E+000
  0.000000000000000E+000
  0.000000000000000E+000
  0.000000000000000E+000
  0.000000000000000E+000
  0.000000000000000E+000
  0.000000000000000E+000
  0.000000000000000E+000
   1.50235163739467     
   1.50226254361277     
  6.484601668256388E-007
   141914.152133310     
  0.101287545458247     
  2.735636356225588E-008
  0.354290621041943     
  1.793955951946925E-006
   20.4870137656203     
   3.76571979085351     
  0.000000000000000E+000
  0.000000000000000E+000
  0.000000000000000E+000
  0.000000000000000E+000
  0.000000000000000E+000
  0.000000000000000E+000
  0.000000000000000E+000
  0.000000000000000E+000
  0.000000000000000E+000
  6.204528789005467E-026
   1197630.79641116     
   319223802.893499     
   57592.1474712099     
   1526985.29759148     
   9167.66377536601     
   1086.59996473964     
  2.151360426910226E-002
   357.006698518127     
   49.8429594125846     
   75.2353991779600     
   9537.12556451663     
   82846.8753701853     
   29633.1797071070     
  3.135608756393319E-002
  0.615976881354384     
  0.116718983852173     
  0.143610061088819     
  2.608936055964730E-016
  2.727253777053871E-034
  1.125259069626295E-006
