# Supplementary material for: Oxidation of low-molecular weight organic compounds in clouddroplets: development of the JAMOC chemical mechanism inCAABA/MECCA (version 4.5.0gmdd)
Source: Copernicus journal article supplement (doi:10.5194/gmd-2020-337), 2020-10-29
Supplement: Supplementary file 20 [file gmd-2020-337-supplement.zip › caaba_4.5.0gmdd/testsuite/traject/caaba_traject.nml]

! -*- f90 -*- Time-stamp: <2013-10-12 23:21:36 sander>

!*****************************************************************************
! coupling namelist for CAABA BOXMODEL
!*****************************************************************************

! TRAJECTORY mode
! typical applications:
! - move a 'box' through the atmosphere, e.g., along a trajectory
! - simulate changing physical parameters over time, e.g., in a reaction
!   chamber
!
! INPUT files:
! 1) input_physc: netCDF file with physical parameters
!   - Must contain at least 2 trajectory waypoints with the variables (see
!     also external variable names below)
!     temperature [K]
!     pressure [Pa]
!     relative humidity [0-1] or specific humidity [kg/kg]
!     latitude [deg north] -> photolysis rates
!     longitude [deg east] -> photolysis rates
!     time origin in 'seconds/minutes/hours/days since yyyy-mm-dd hh:mm:ss'
!     use fixed variable on time axis to simulate a fixed value
! 2) input_jval (optional): netCDF file with photolysis rates for J_NO2
!   - must be on same time axis as input_physc
!   - can be in same file with input_physc and/or init_spec
!   - no file given => no scaling applied to JVAL j-values
!   - JVAL must be used as photolysis rate submodel (USE_JVAL = T and
!     photrat_channel = 'jval')
!   - a scaling factor (J_NO2 from input_jval)/(J_NO2 JVAL) is then applied
!     to all photolysis rates in CAABA:
!     j_X = (j_X_JVAL)/(j_NO2_JVAL)*j_NO2_external
! 3) init_spec (optional): netCDF file with initial values for chemical
!    species
!   - overwrites CAABA init_scenario values;
!   - can be in same file with input_physc and/or input_jval
!   - no time axis needed (ignored if only 1 point in time present)
!   - if >= 2 points on time axis present and string 'stime' is set
!     then interpolation to desired
!     model start time is performed for inintialization
!   - species not included in current meccanism are skipped


&CAABA

 USE_JVAL    = T
 USE_MECCA   = T
 USE_SAPPHO  = T
!USE_SEMIDEP = T
 USE_TRAJECT = T

!--- see "list_of_scenarios" in caaba.f90 for possibilities:
!init_scenario     = 'CUMULUS'
!photo_scenario    = ''
!emission_scenario = ''
!drydep_scenario   = ''

!--- Choose a channel that contains J-values for photolysis reactions:
 photrat_channel = 'jval'
!photrat_channel = 'sappho'


!--- PHYSC: physical (trajectory) data as function of time
!input_physc = 'input/traject/example_input_physc.nc'
 input_physc = 'input/traject/example_input_physc_jval_init_spec.nc'

!--- JVAL: external J_NO2 j-values for scaling j-values computed by JVAL
!input_jval = 'input/traject/example_input_jval_no2.nc'
 input_jval = 'input/traject/example_input_physc_jval_init_spec.nc'

!--- CHEM: init chemical species
!---   examples in input/traject:
!---     point data, time axis ignored: example_init_spec.nc
!---     with time axis: example_input_physc_jval_init_spec.nc
!init_spec = 'input/traject/example_init_spec.nc'
 init_spec = 'input/traject/example_input_physc_jval_init_spec.nc'
!--- init_spec time variable name, default: TIME; has to be specified to
!---   initiate time interpolation for start mixing ratios
 stime = 'TIME'


!--- TIME
!--- output time step in 'seconds', 'minutes' or 'hours', default: 20 minutes
!timesteplen_str = '15 minutes'
!--- runlast (days), TRAJECT: run only last part of trajectory;
!---   default: not active
!runlast = 0.2
!--- model runtime; default: 8 days
!---   TRAJECT: run only first part of trajectory, applied after runlast
!runtime_str = '0.2 days'
!--- stop caaba when steady state is reached?
!l_steady_state_stop = T
!--- repeat first day for whole simulation
!l_groundhogday = T
!--- freeze time at start time
!l_freezetime = T
!--- model start day, ignored in trajectory mode
!model_start_day = -5.0

!--- input_physc: specify external variable names present in netCDF file
!--- time variable, default: TIME
!vtime    = 'TIME'
!--- vlat: latitude, default: LAT
!vlat = 'LAT_TR'
!--- vlon: longitude, default: LON
!vlon = 'LON_TR'
!--- vpress: pressure, default: PRESS
!vpress = 'PRESS_TR'
!--- vtemp: temperature, default: TEMP
!vtemp = 'TM1'
!--- humidity: activate only one, vspechum or vrelhum
!--- vspechum: specific humidity, default: NOT ACTIVE
!---   specific humidity q (kg/kg) = (mass water vapor)/(mass moist air)
!vspechum = 'QM1'
!vspechum = 'Q'
 vspechum = 'SPECHUM'
!--- vrelhum: relative humidity, default: vrelhum = 'RELHUM'
!---   relative humidity [0-1] in (see also l_relhum_WMO)
!vrelhum = 'RELHUM'

!--- HUMIDITY
!--- convert c(H2O) to relhum or spechum (instead of vice versa)
!l_ignore_relhum = T
!--- relhum WMO definition (H2O(g) mass mixing ratios in dry air over liquid)
!---   instead of traditional p(H2O)/psat(H2O)
!l_relhum_wmo = T
!--- use same psat and cair functions as in EMAC:
!l_hum_emac = T
!--- saturation vapor pressure always over liquid
!l_psat_liquid = T

/

!*****************************************************************************
