# Supplementary figures and images for: Oxidation of low-molecular weight organic compounds in clouddroplets: development of the JAMOC chemical mechanism inCAABA/MECCA (version 4.5.0gmdd)
Source: Copernicus journal article supplement (doi:10.5194/gmd-2020-337), 2020-10-29

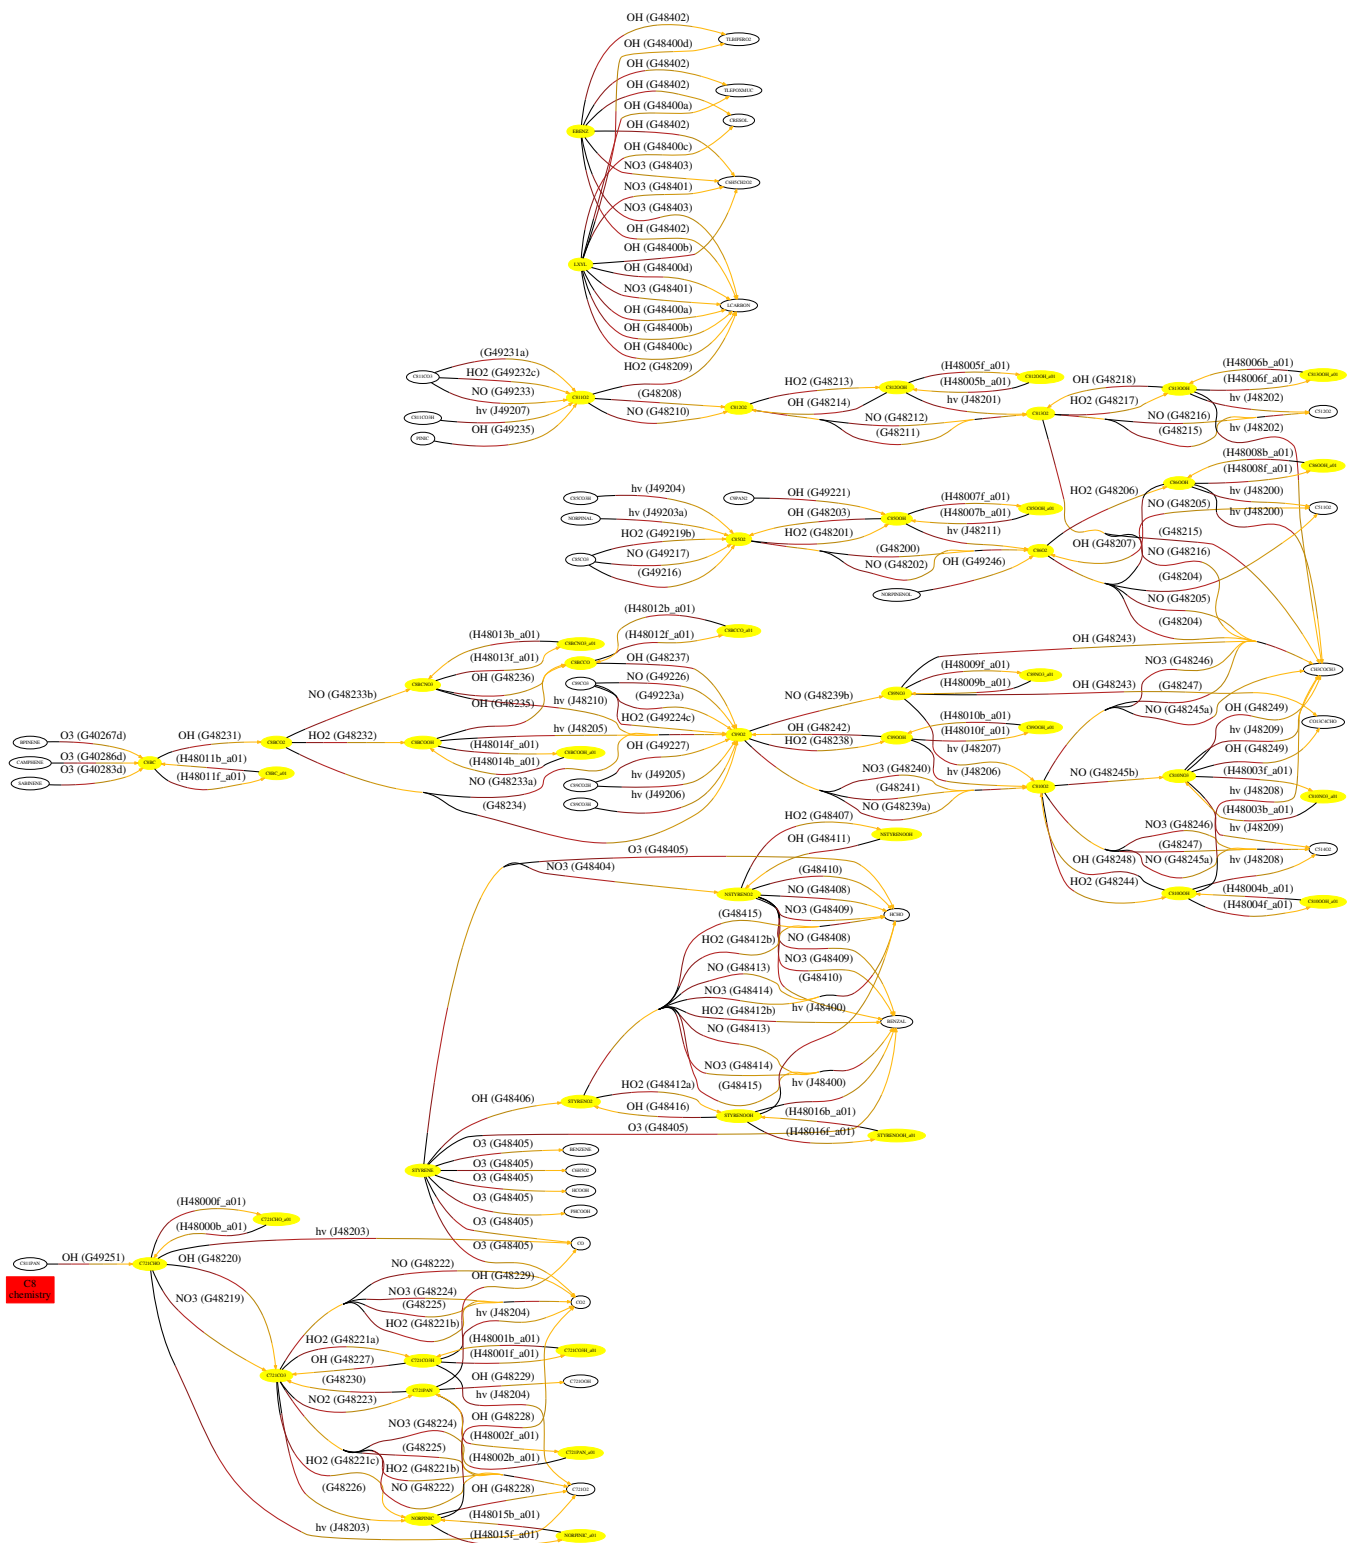

Supplement: Supplementary file 1 [file gmd-2020-337-supplement.zip]

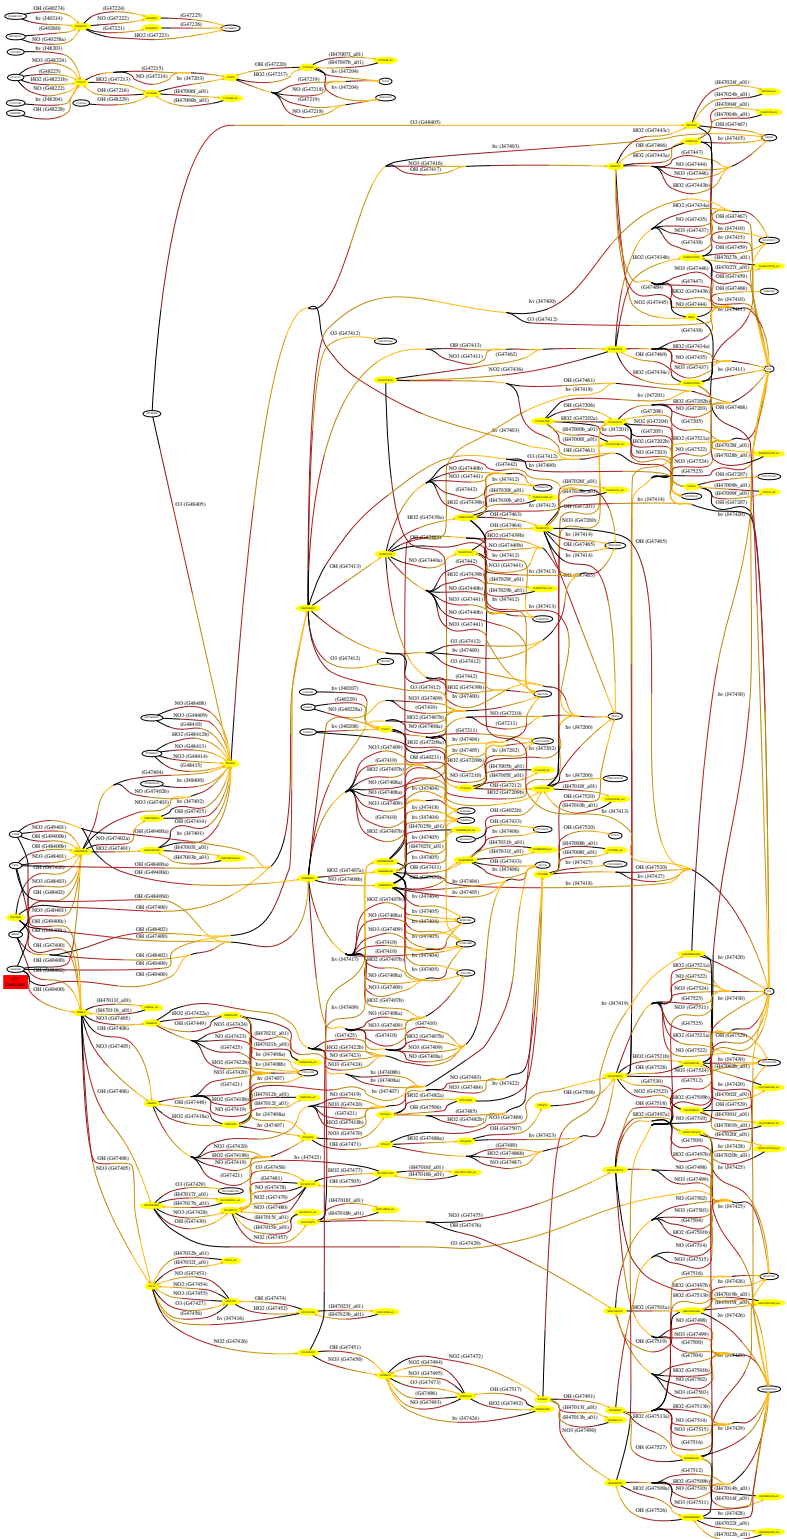

Supplement: Supplementary file 2 [file gmd-2020-337-supplement.zip]

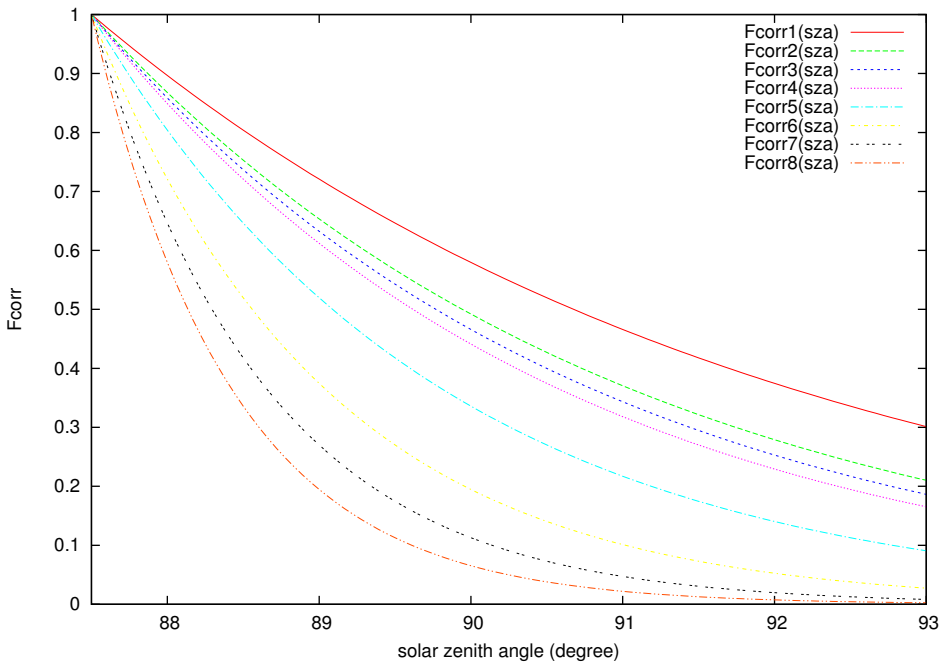

Supplement: Supplementary file 3 [file gmd-2020-337-supplement.zip]

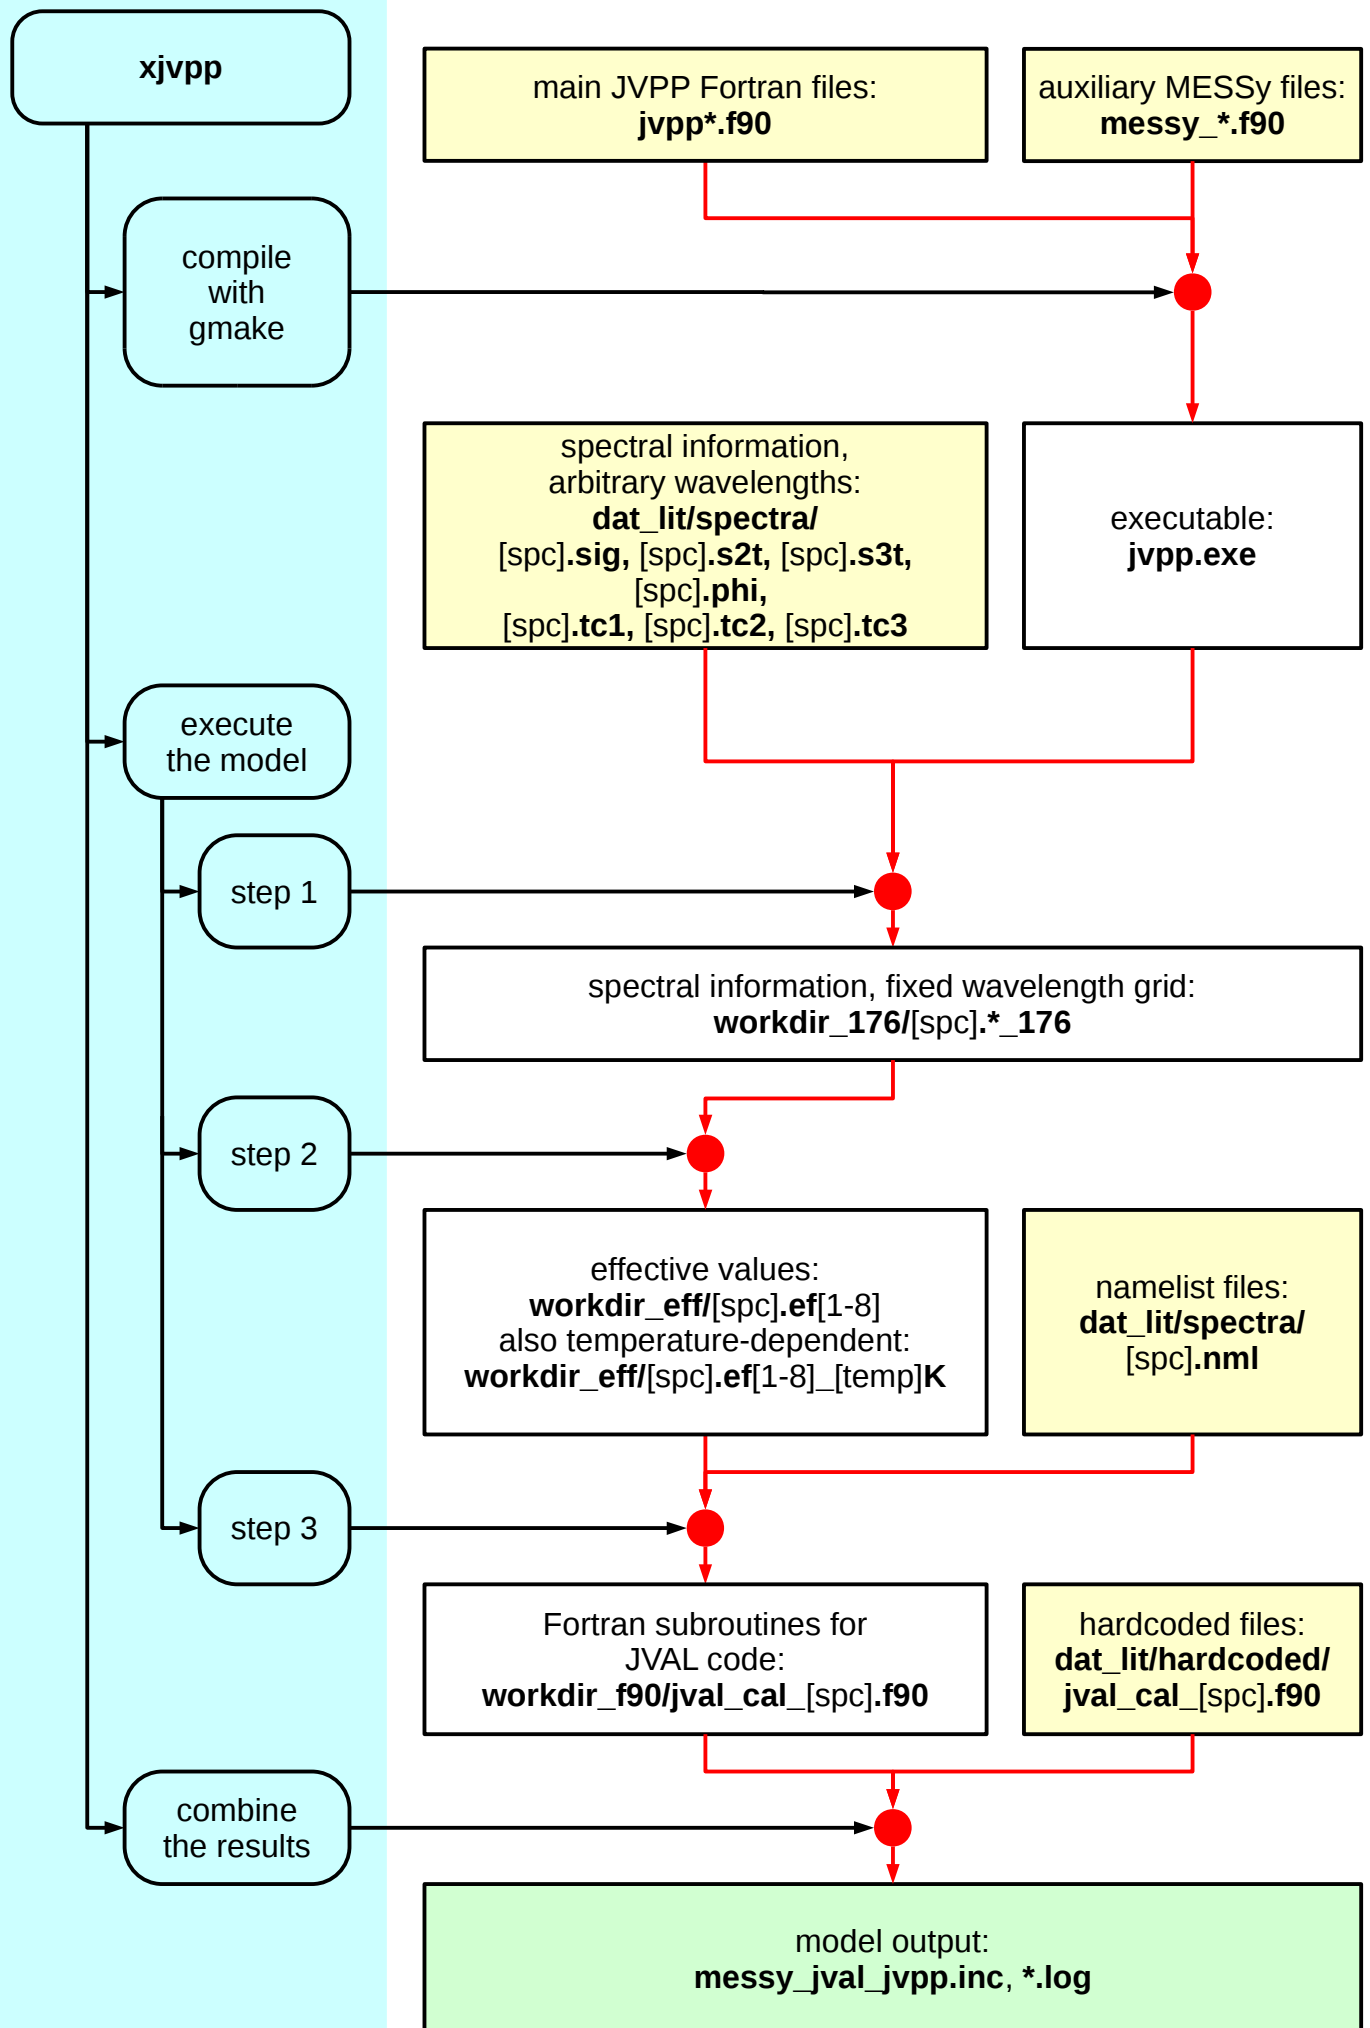

Supplement: Supplementary file 4 [file gmd-2020-337-supplement.zip]

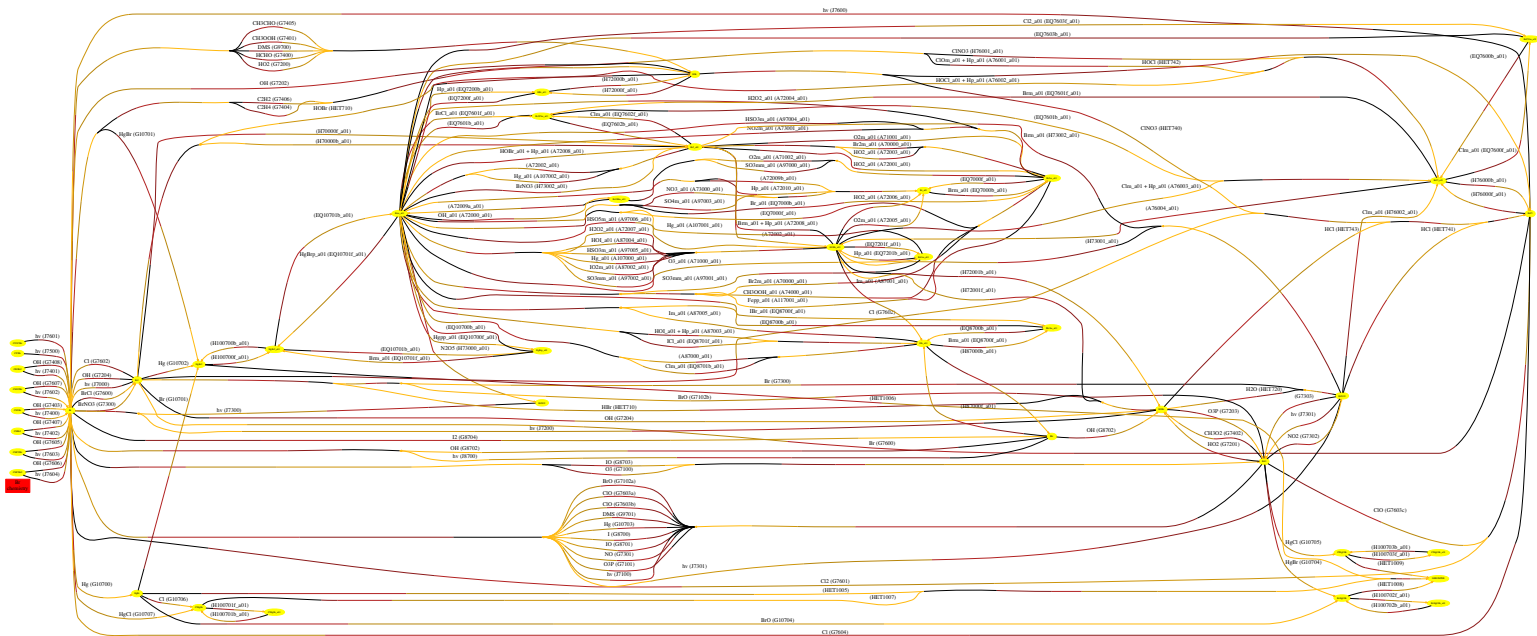

Supplement: Supplementary file 8 [file gmd-2020-337-supplement.zip]

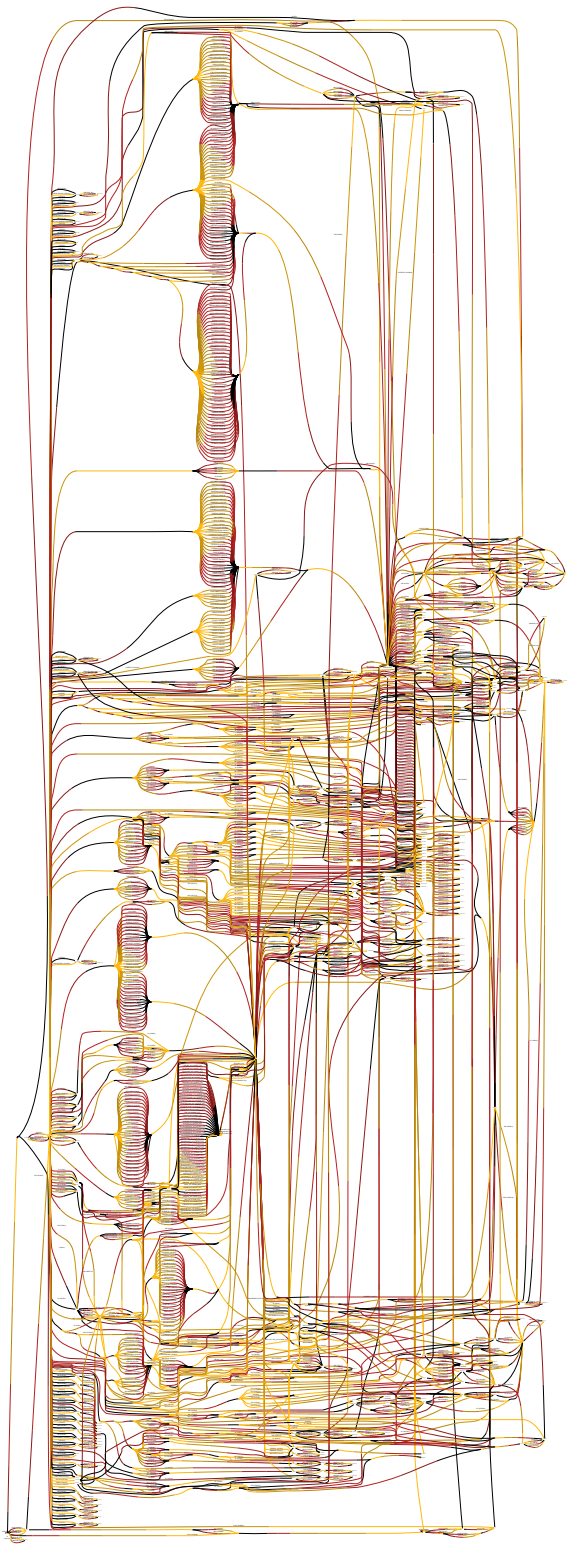

Supplement: Supplementary file 9 [file gmd-2020-337-supplement.zip]

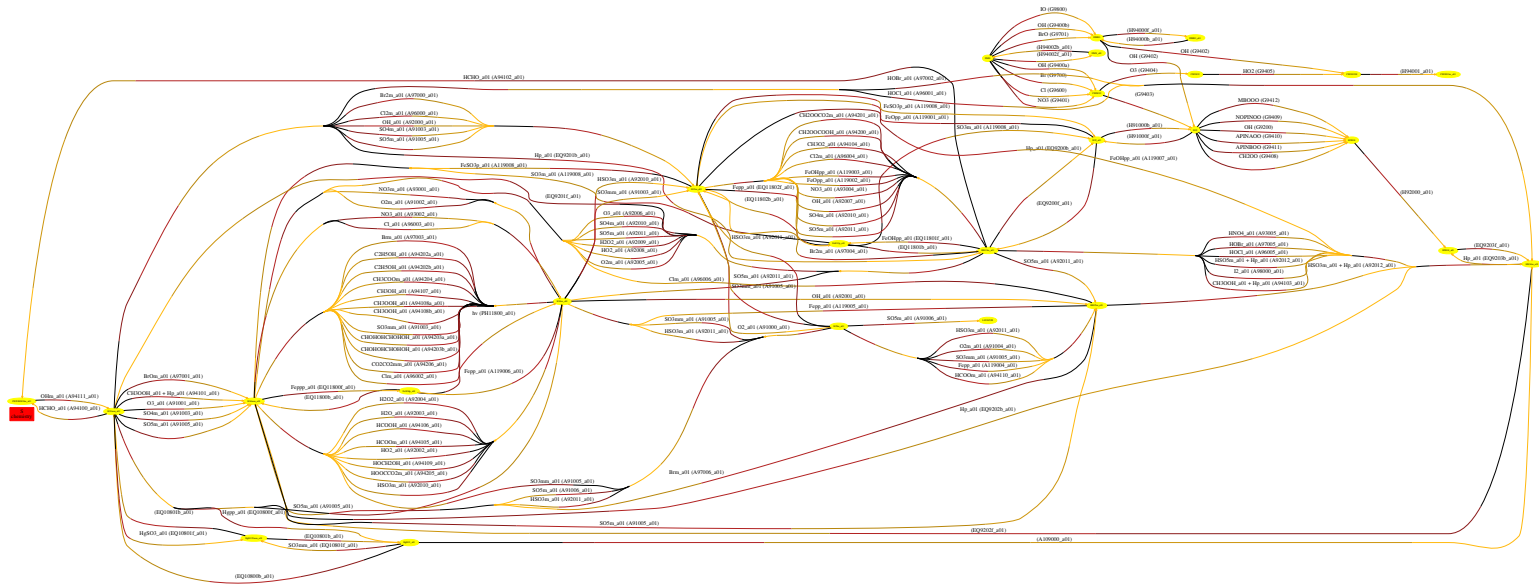

Supplement: Supplementary file 10 [file gmd-2020-337-supplement.zip]

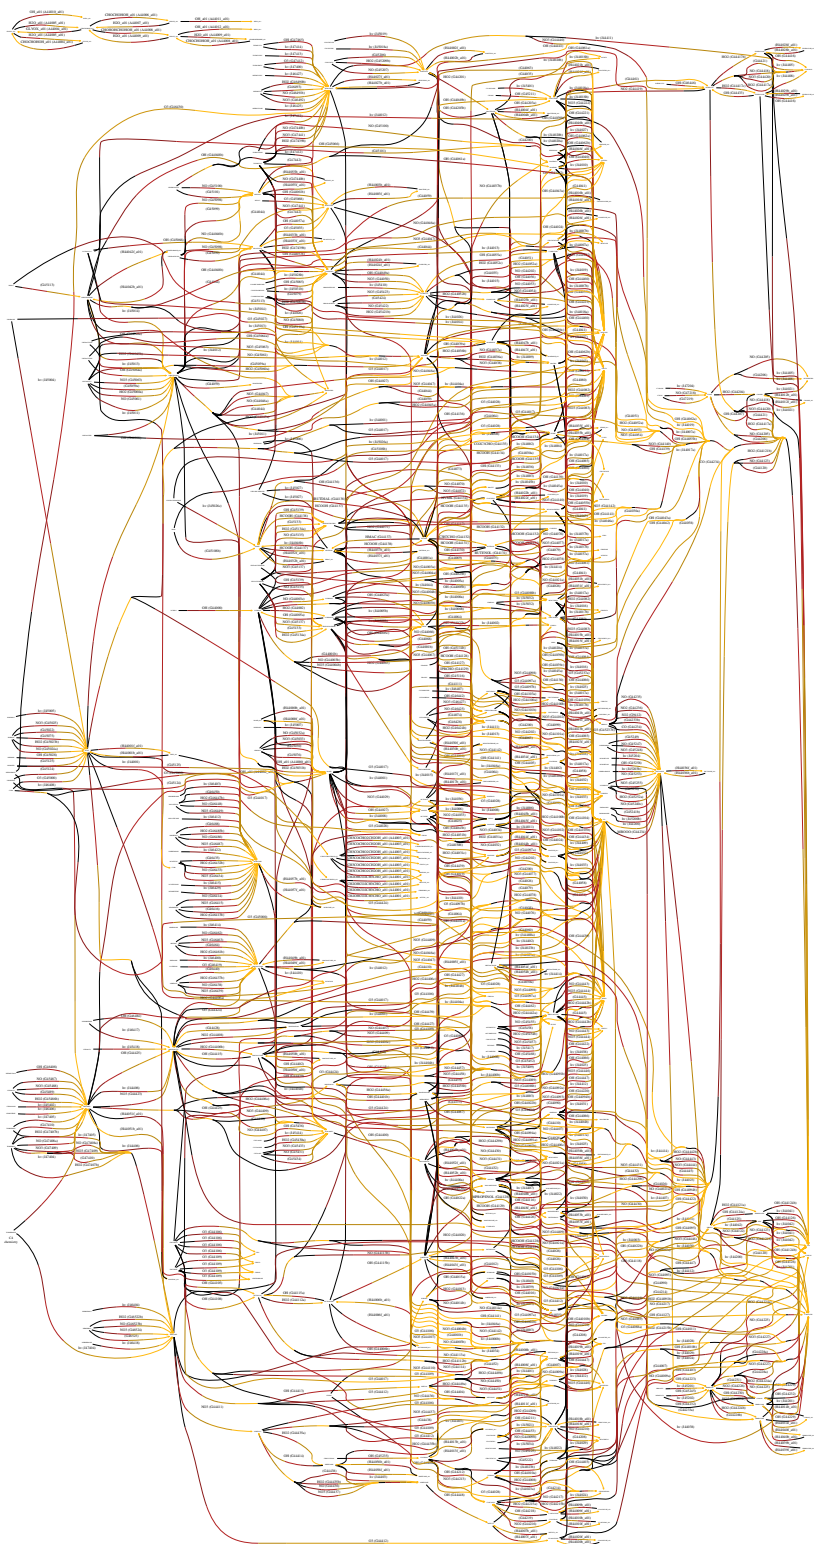

Supplement: Supplementary file 13 [file gmd-2020-337-supplement.zip]

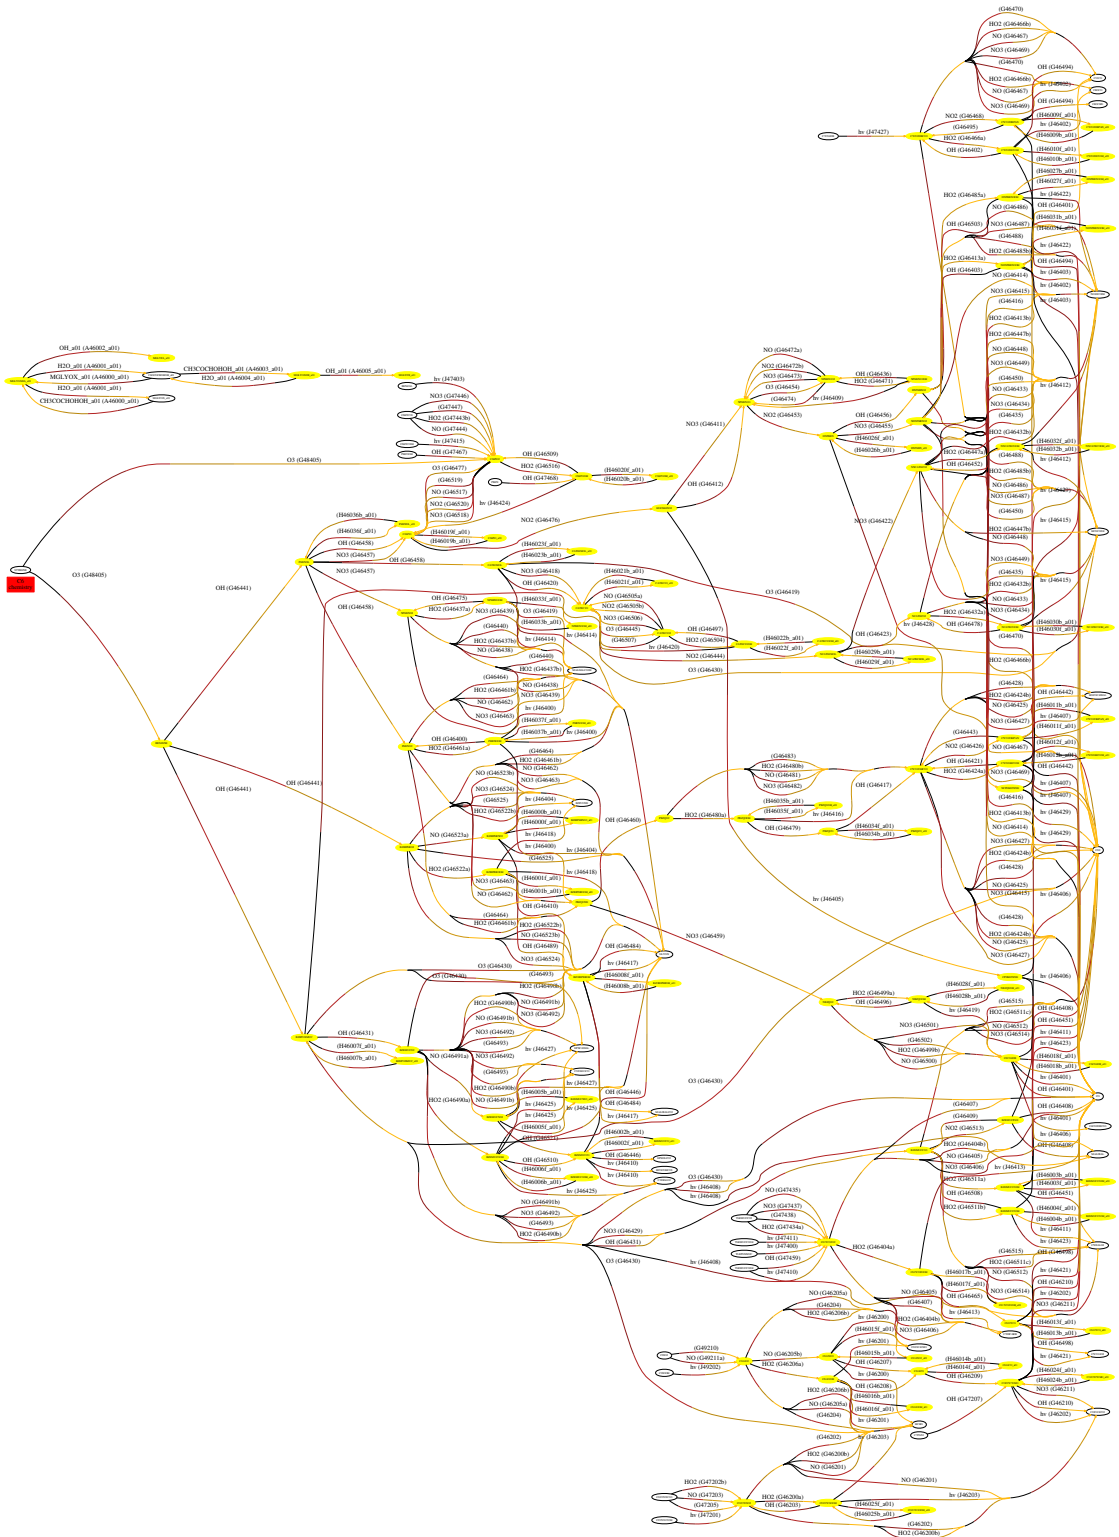

Supplement: Supplementary file 14 [file gmd-2020-337-supplement.zip]

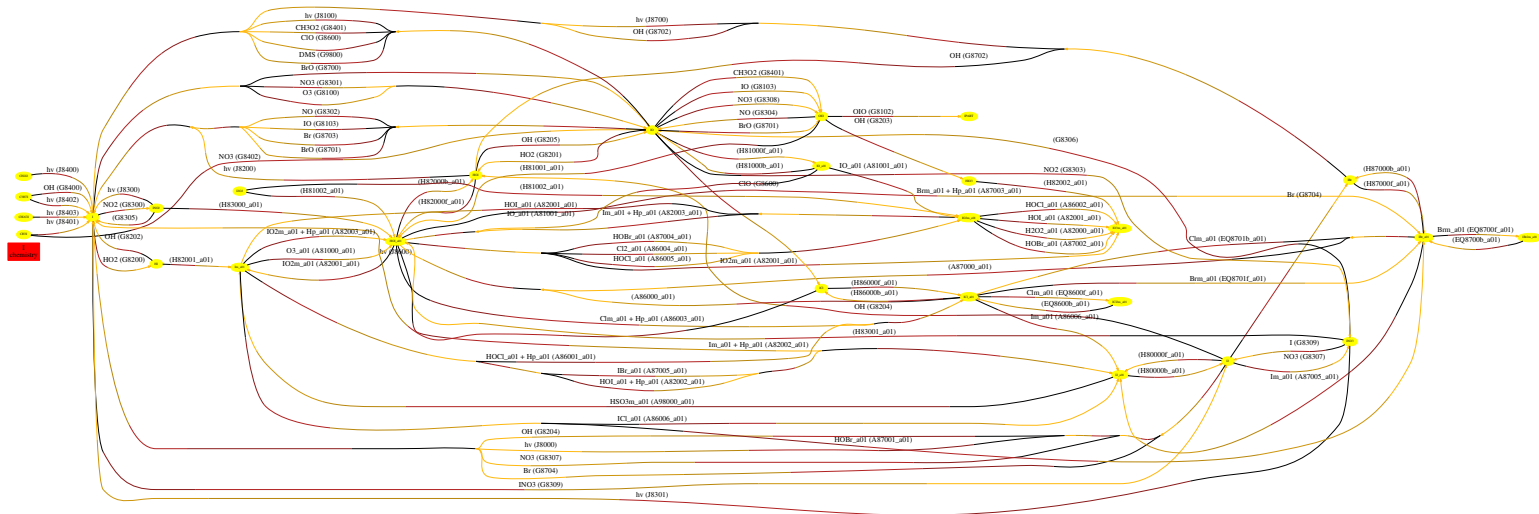

Supplement: Supplementary file 16 [file gmd-2020-337-supplement.zip]

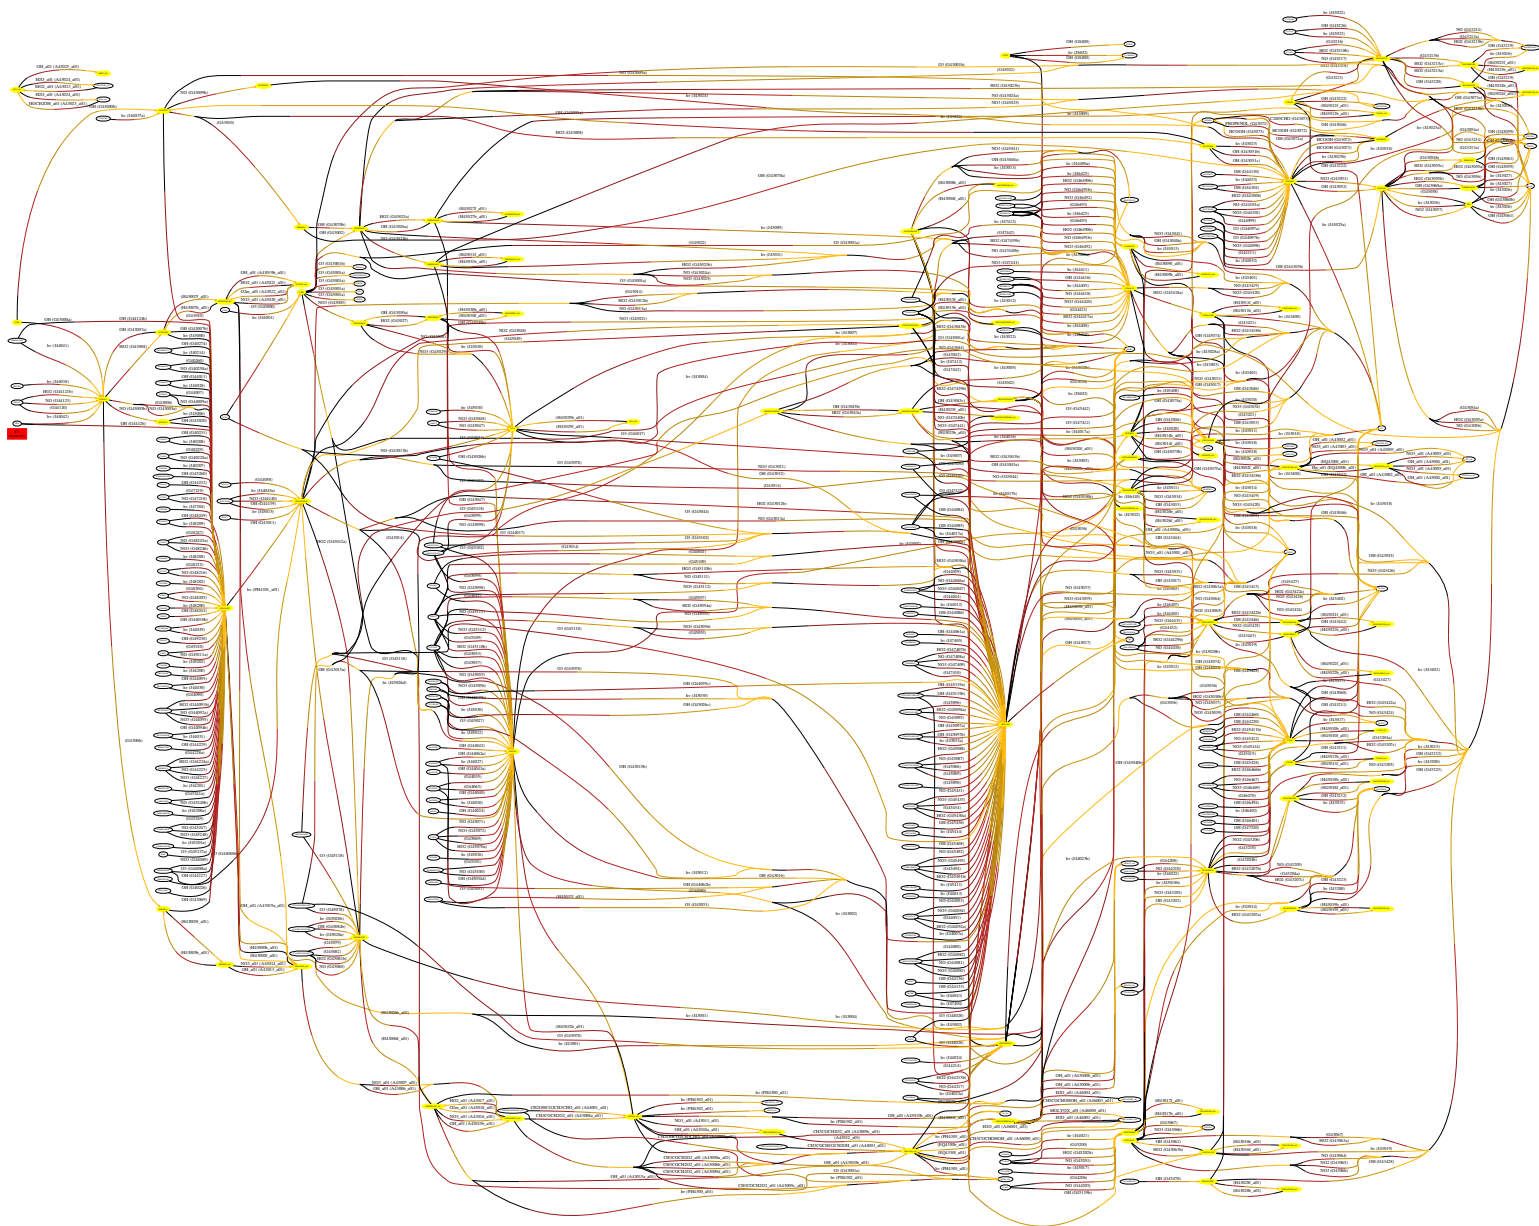

Supplement: Supplementary file 17 [file gmd-2020-337-supplement.zip]

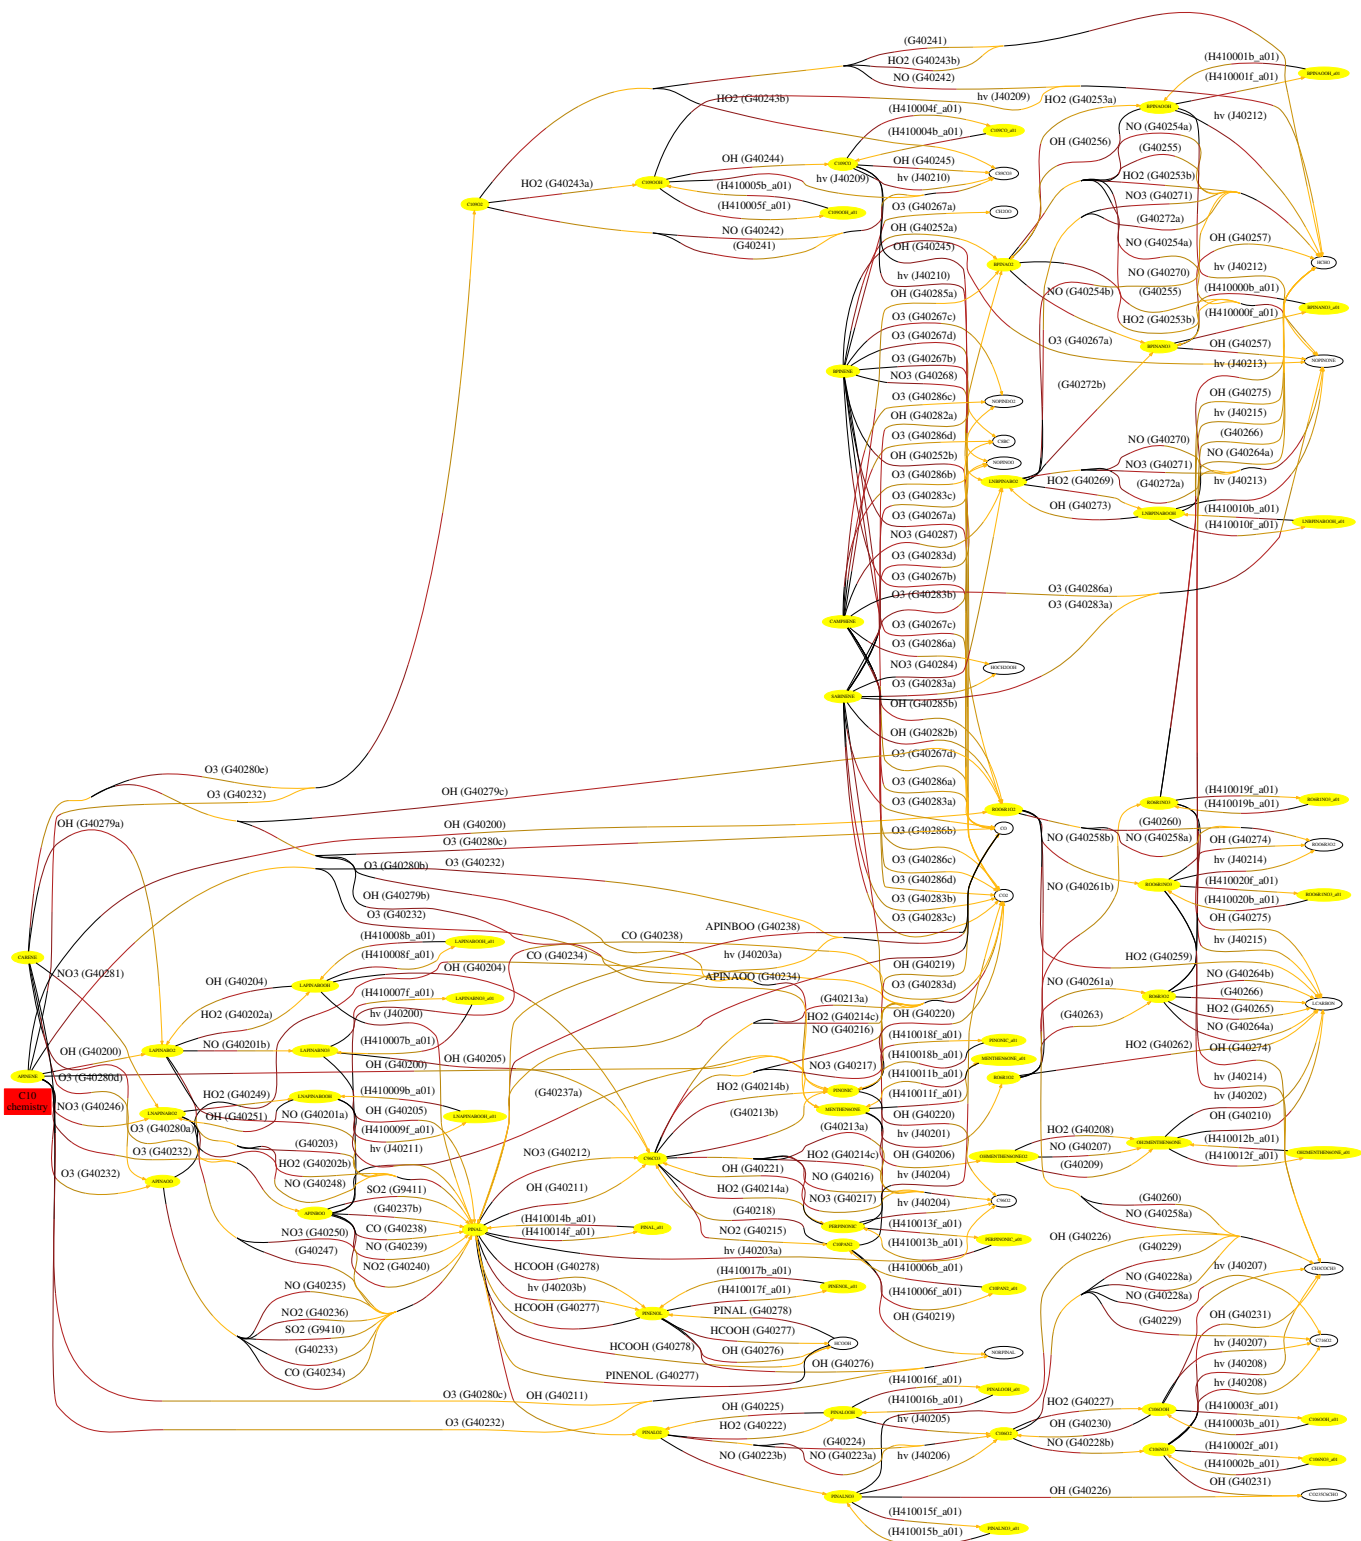

Supplement: Supplementary file 18 [file gmd-2020-337-supplement.zip]

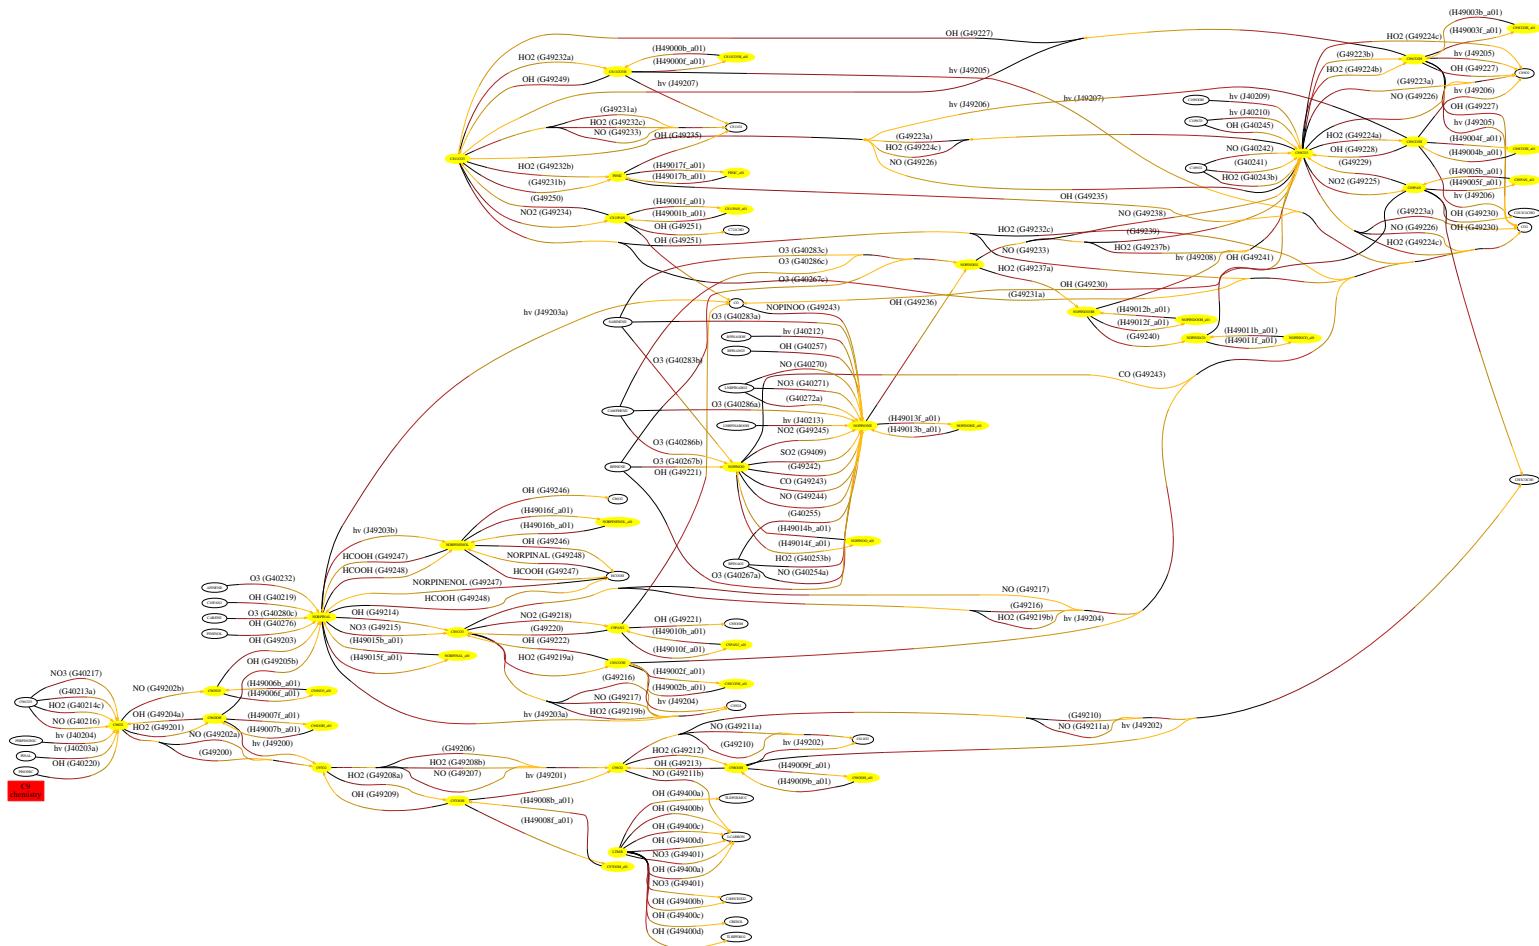

Supplement: Supplementary file 19 [file gmd-2020-337-supplement.zip]

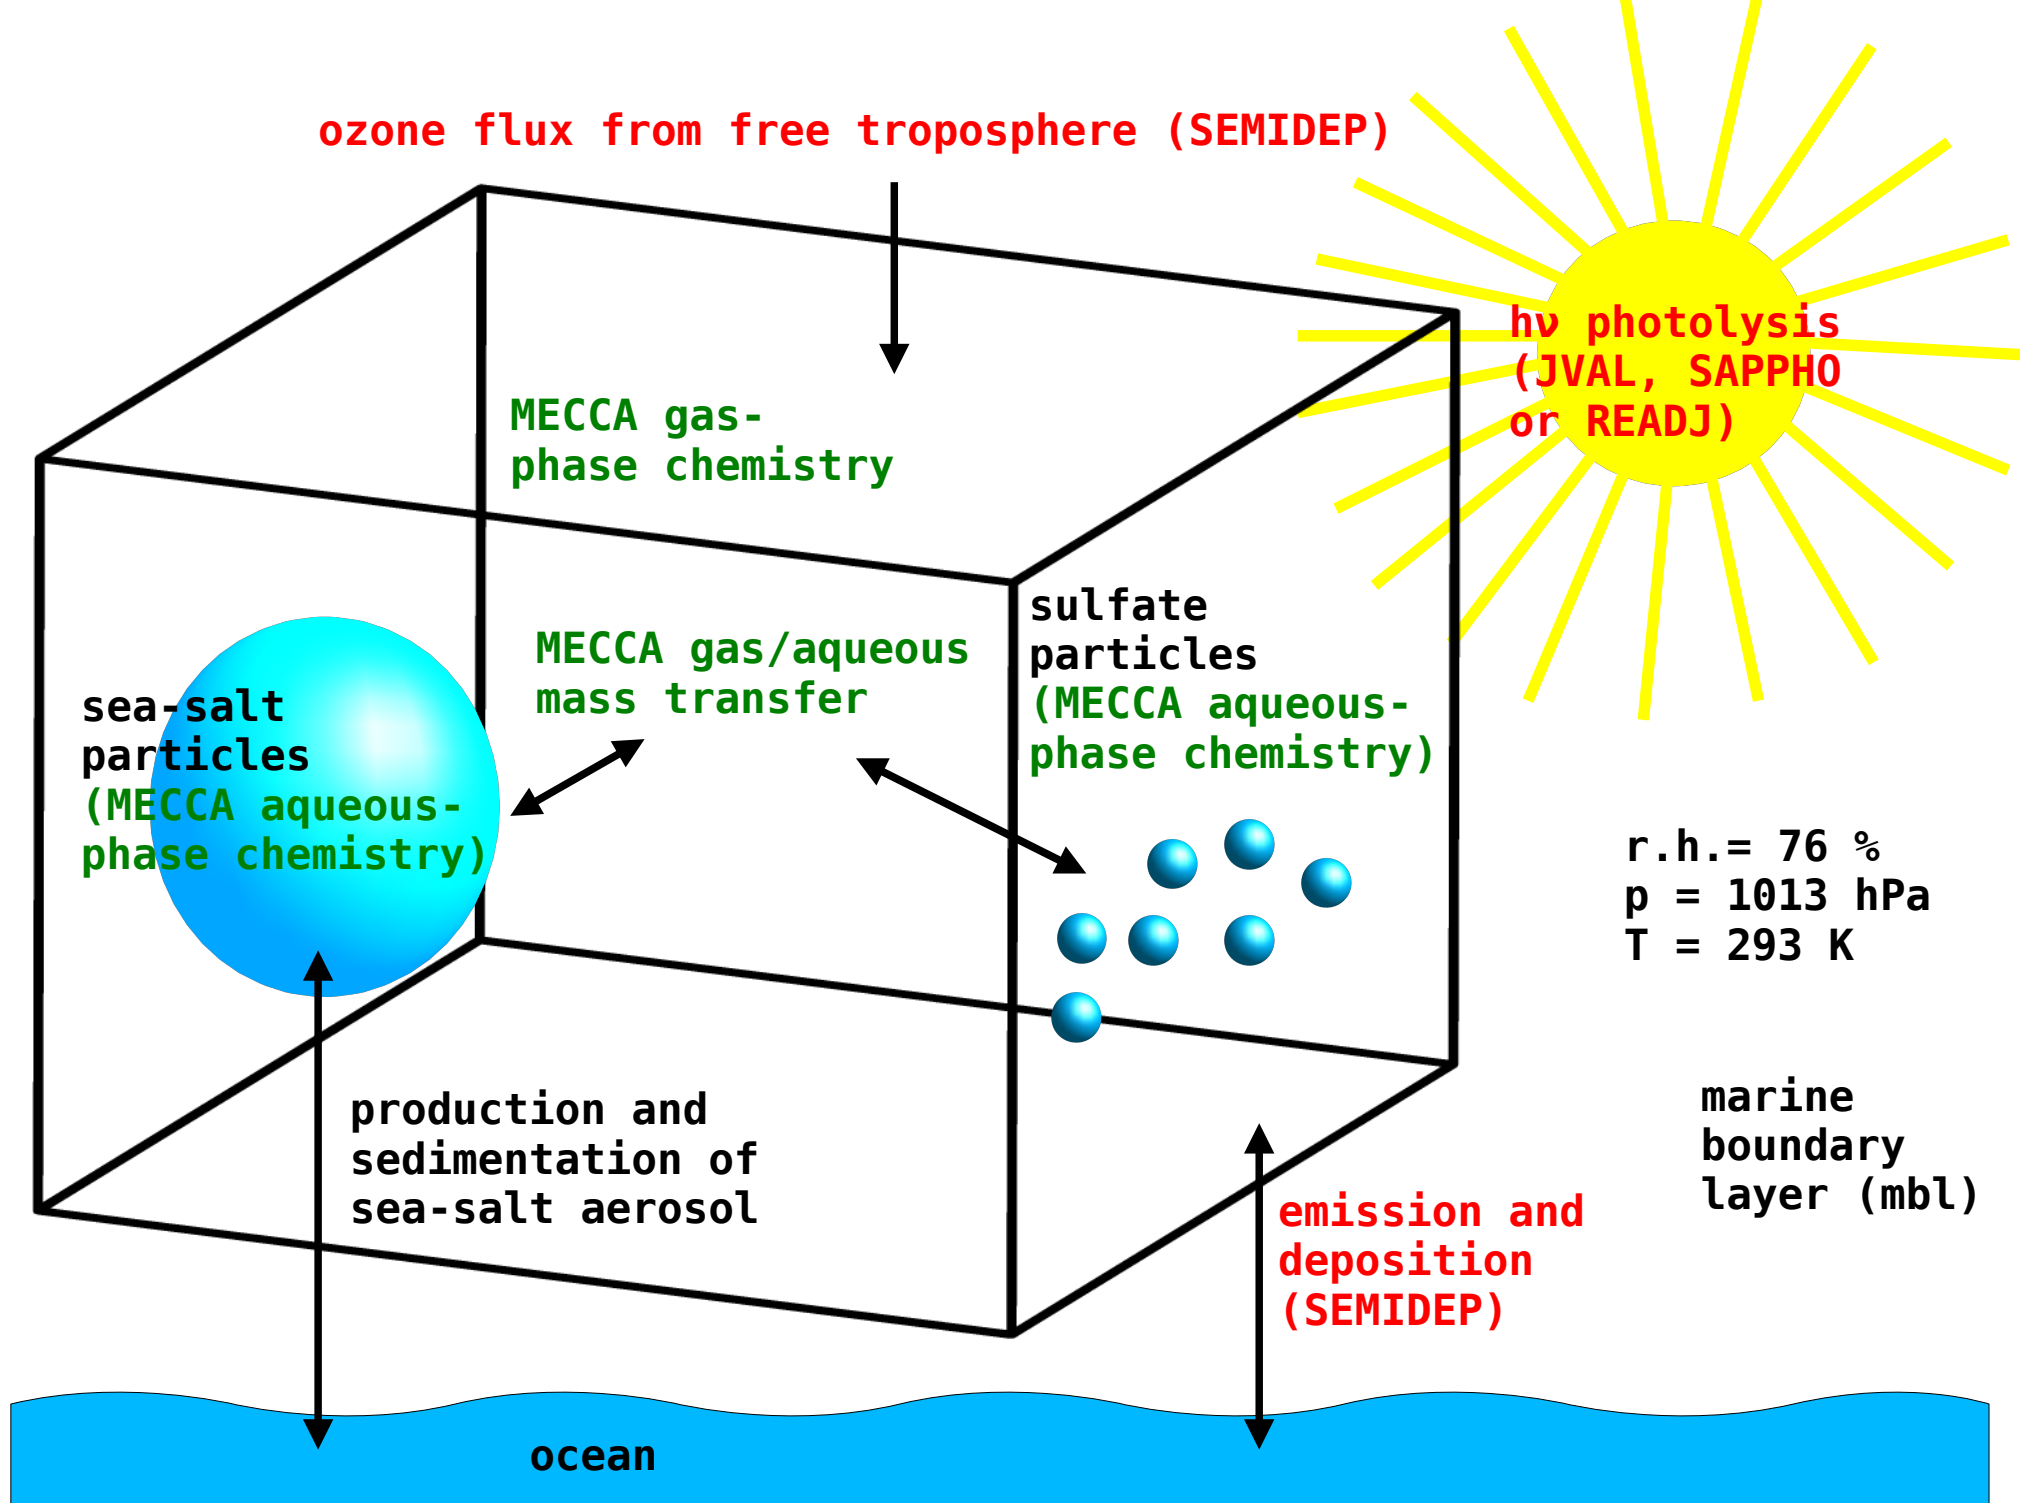

Supplement: Supplementary file 20 [file gmd-2020-337-supplement.zip › caaba_4.5.0gmdd/manual/caaba_sketch.pdf]

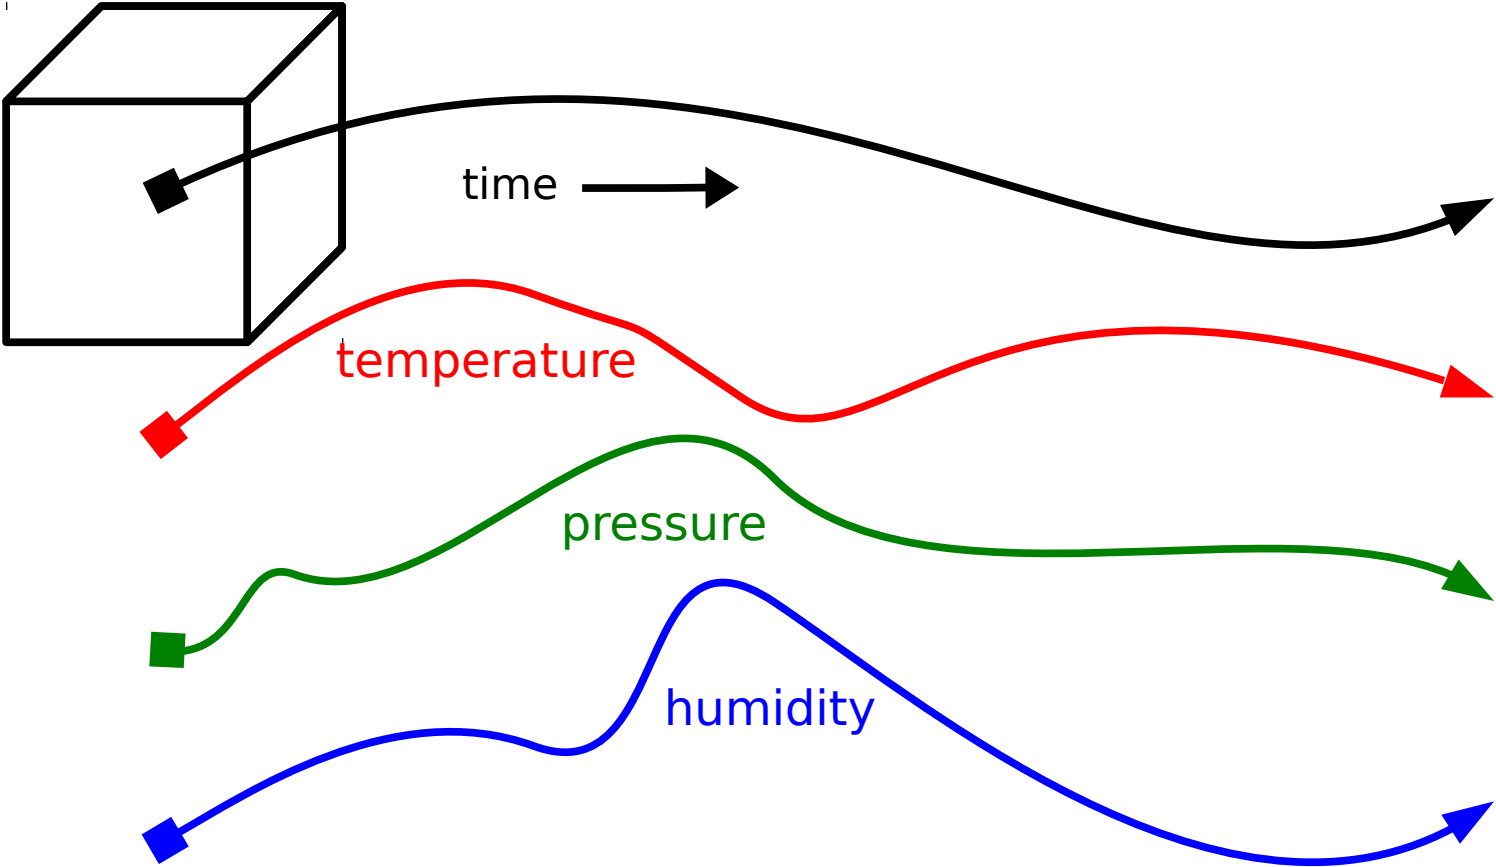

Supplement: Supplementary file 20 [file gmd-2020-337-supplement.zip › caaba_4.5.0gmdd/manual/box_model_trajec.pdf]

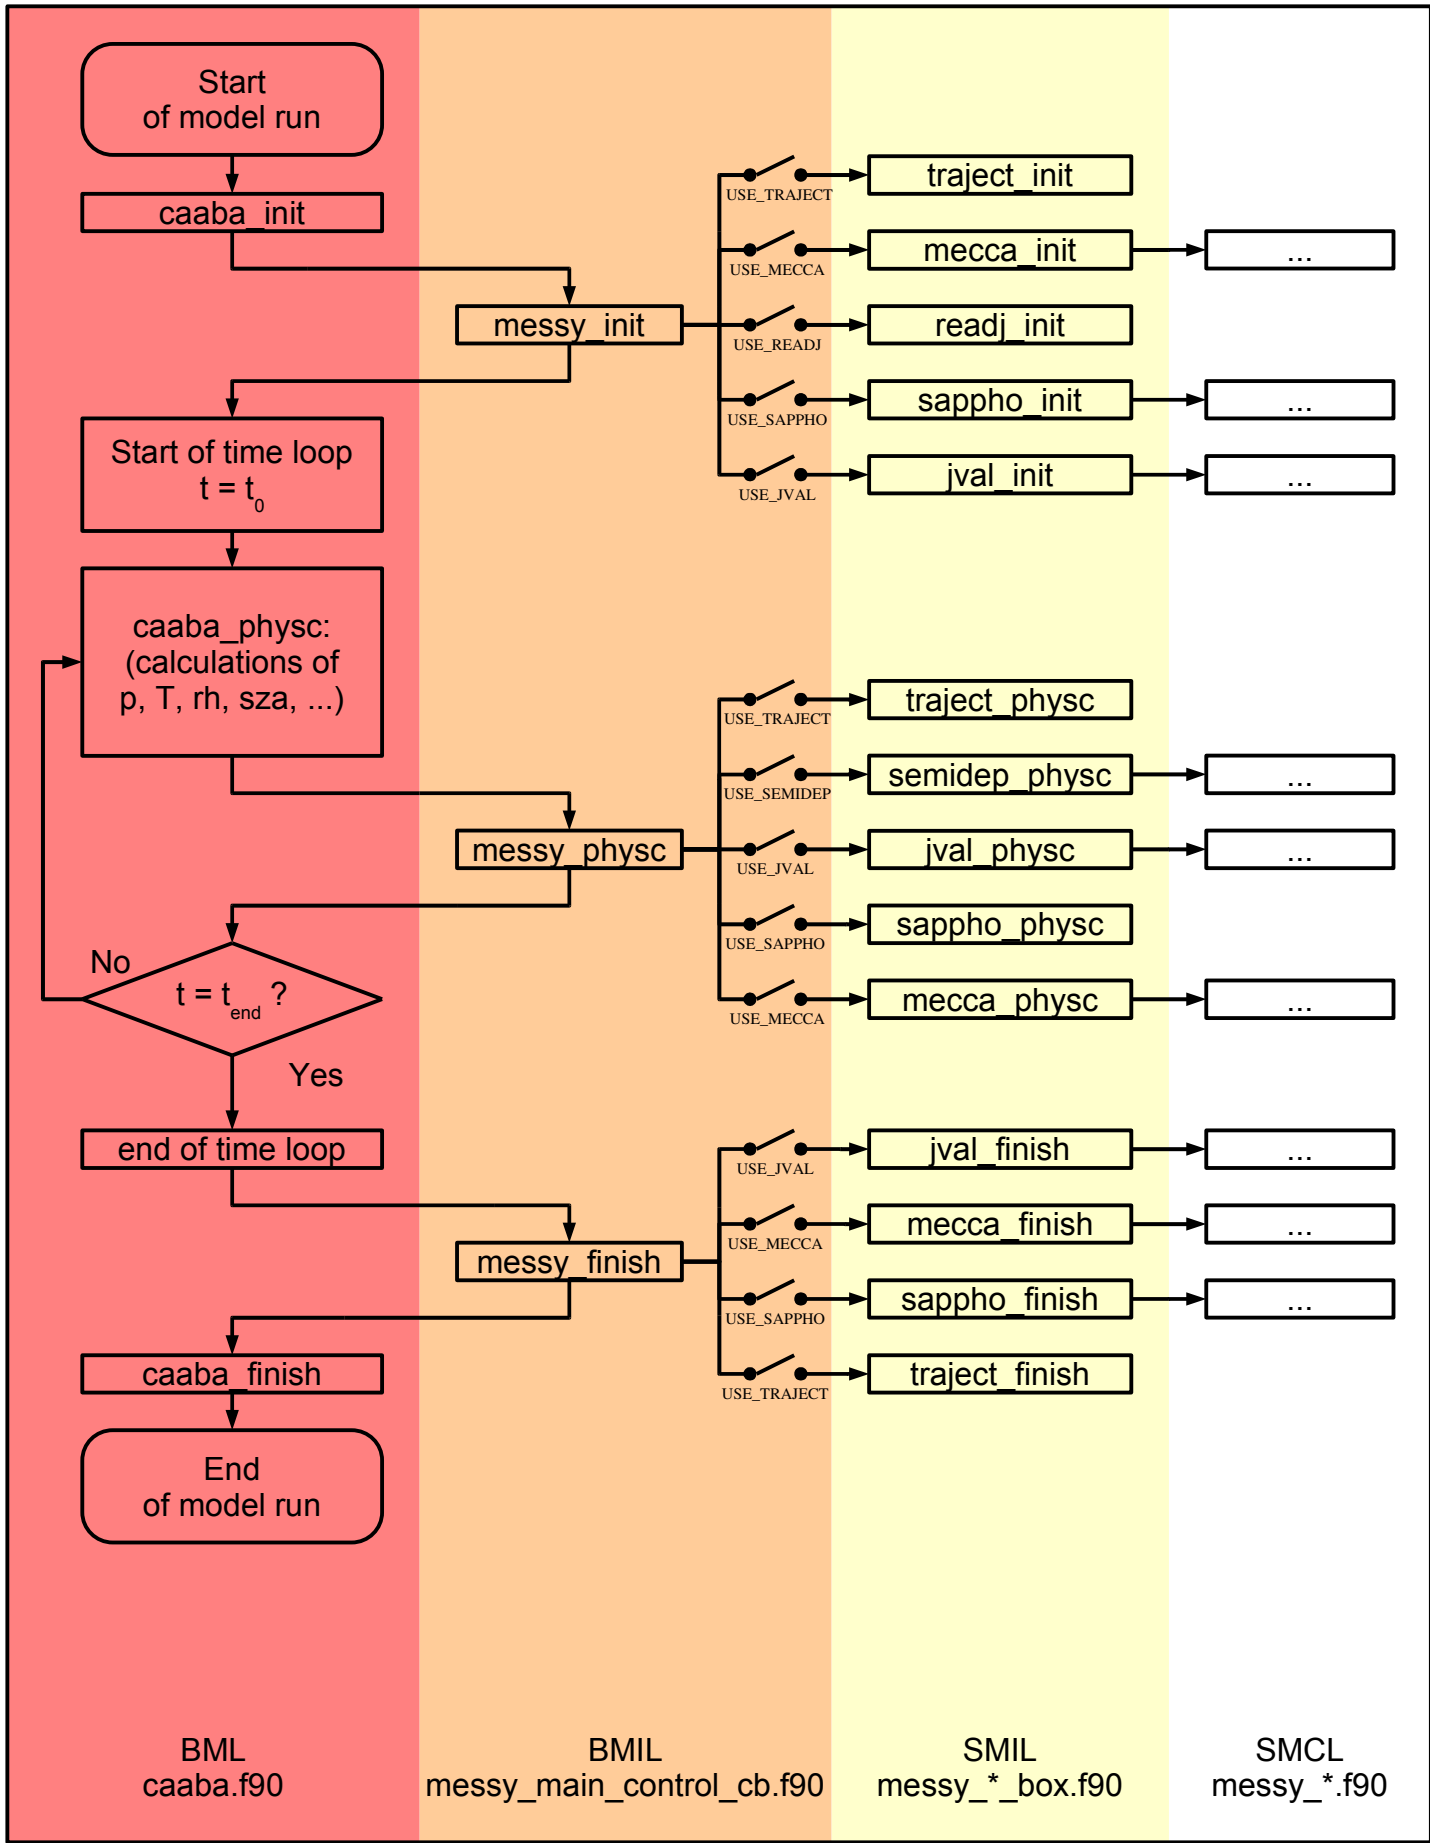

Supplement: Supplementary file 20 [file gmd-2020-337-supplement.zip › caaba_4.5.0gmdd/manual/caaba_flowcontrol.pdf]

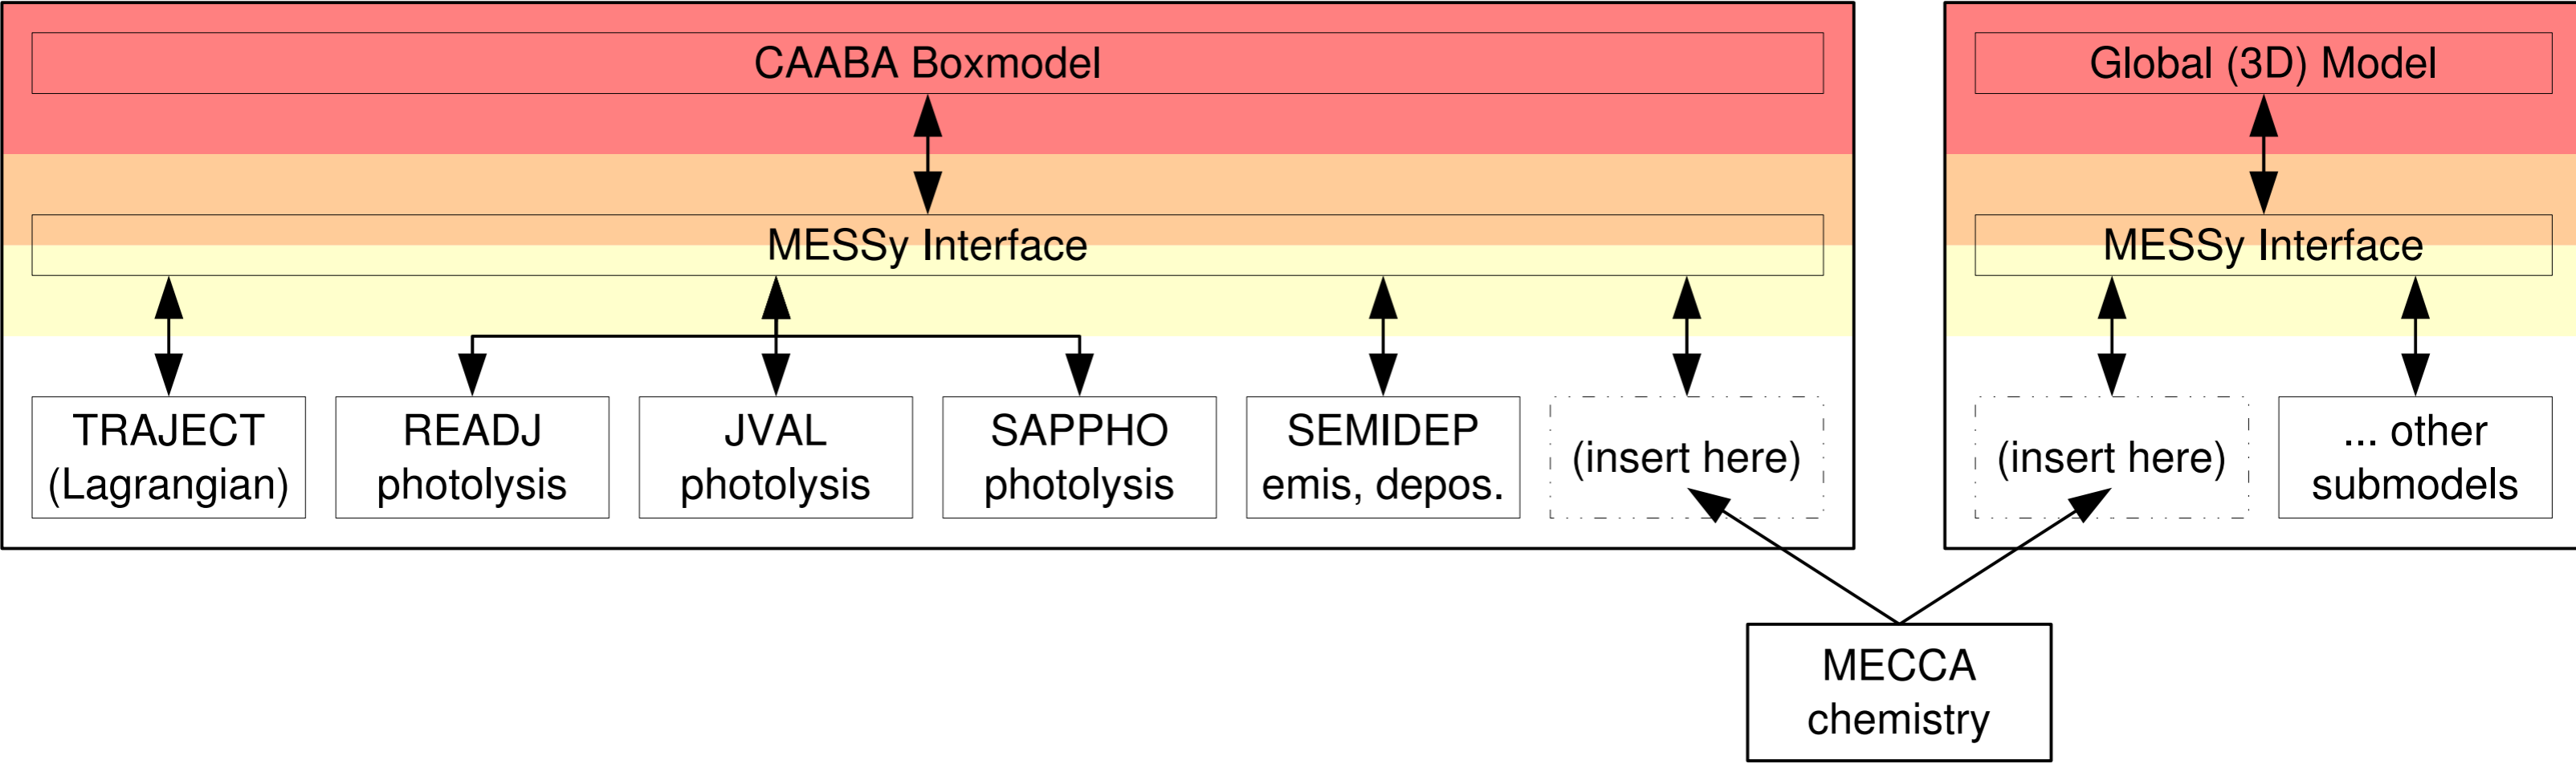

Supplement: Supplementary file 20 [file gmd-2020-337-supplement.zip › caaba_4.5.0gmdd/manual/modular-mecca.pdf]

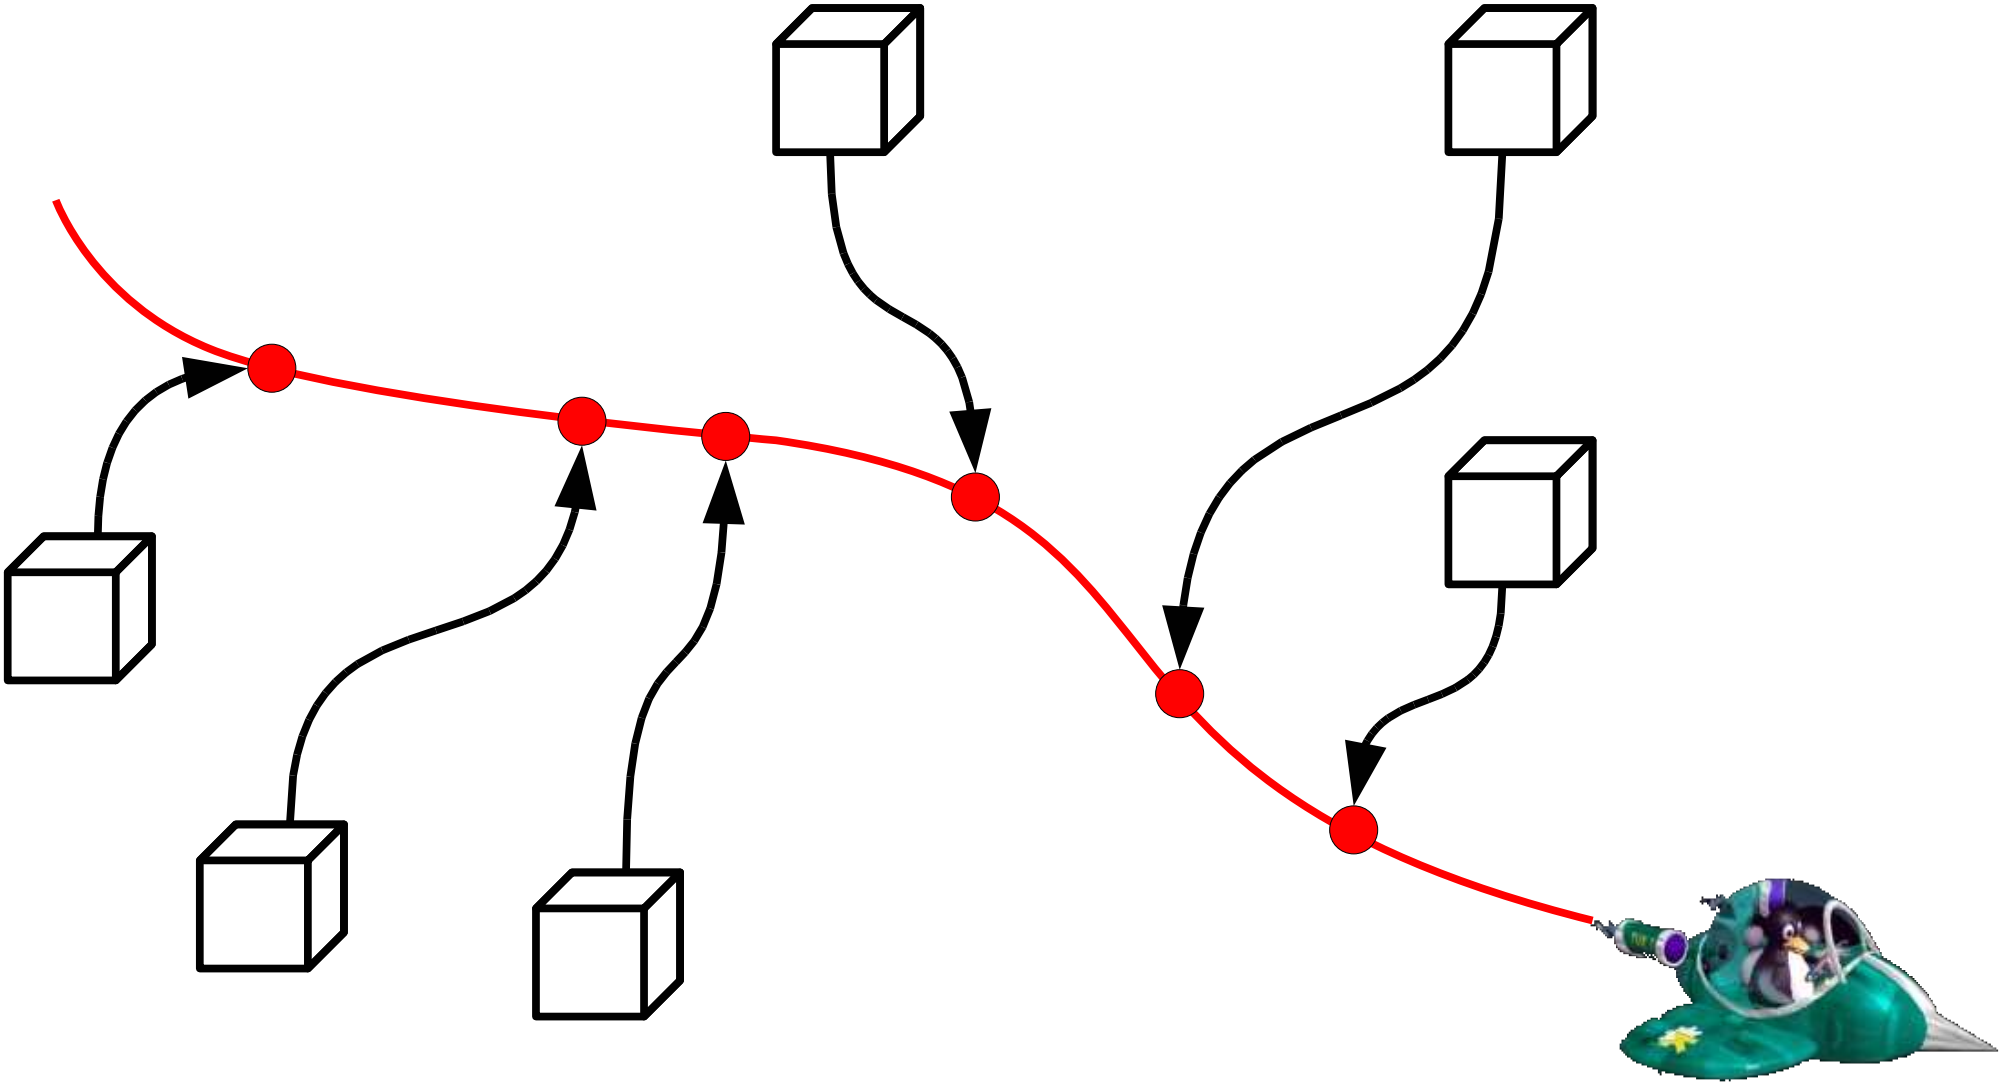

Supplement: Supplementary file 20 [file gmd-2020-337-supplement.zip › caaba_4.5.0gmdd/manual/traject_model.pdf]

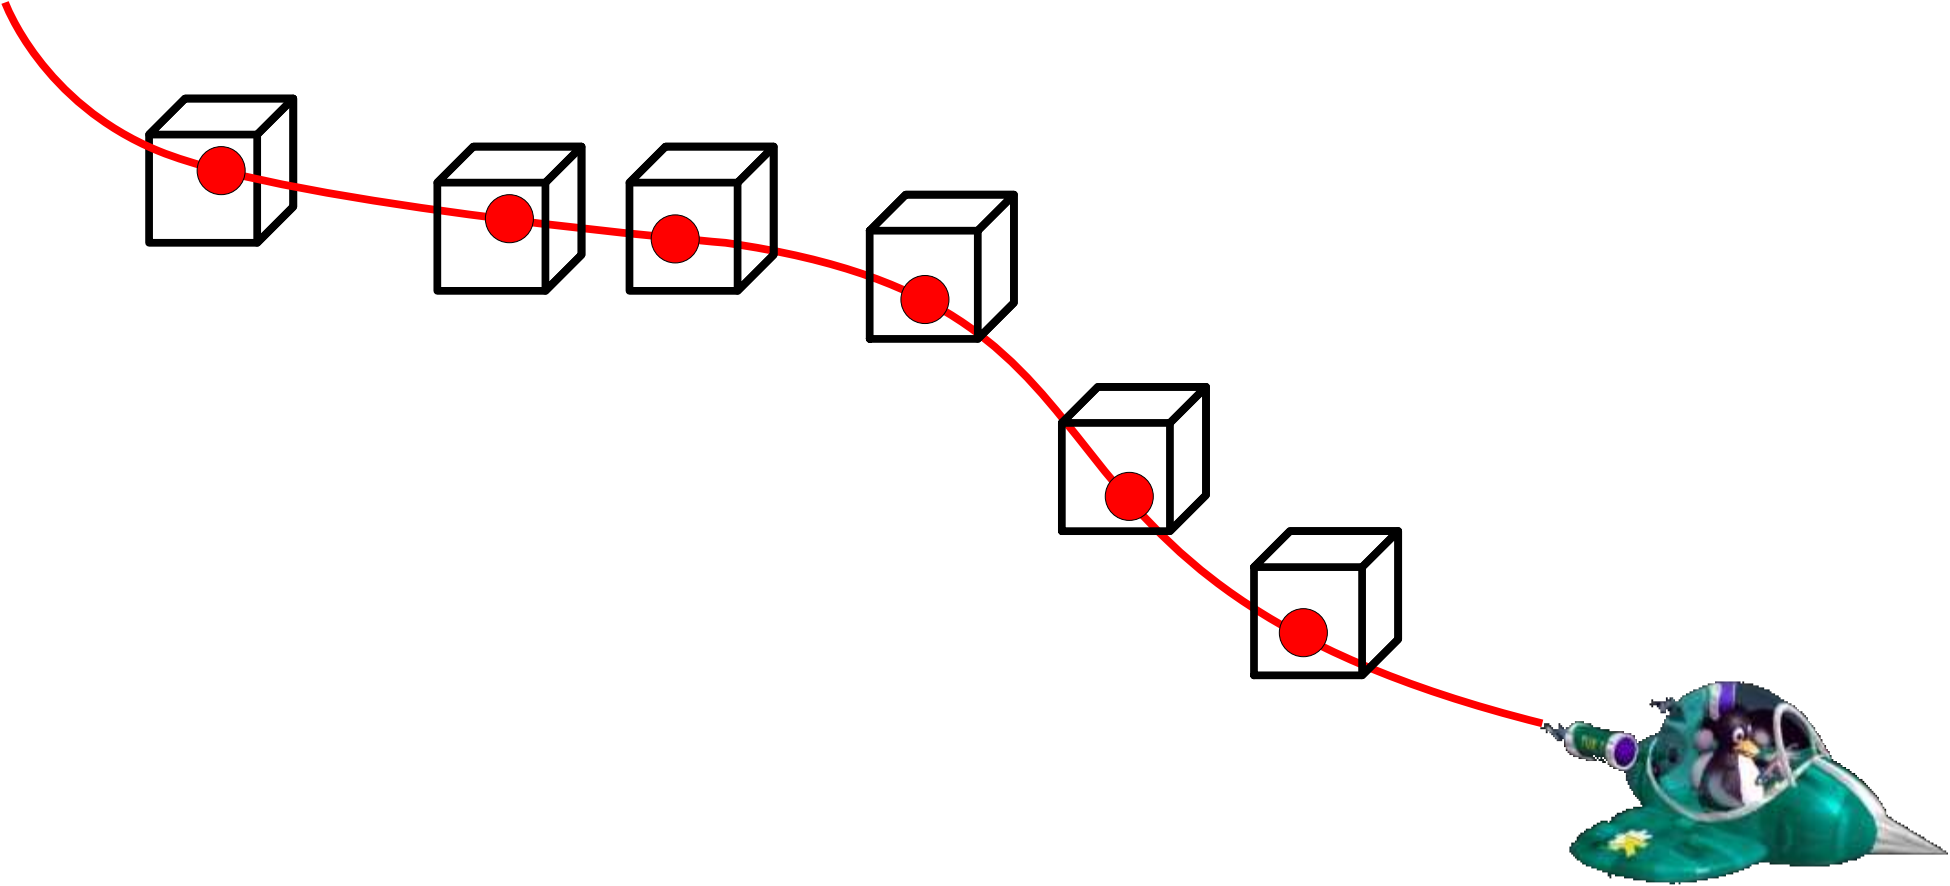

Supplement: Supplementary file 20 [file gmd-2020-337-supplement.zip › caaba_4.5.0gmdd/manual/steady_state_model.pdf]

## Slide: page1

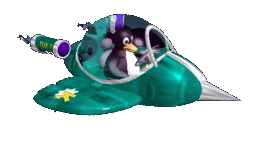

Supplement: Supplementary file 20 [file gmd-2020-337-supplement.zip › caaba_4.5.0gmdd/manual/traject_model.odg]

*C A A B A*

**M E C C A**

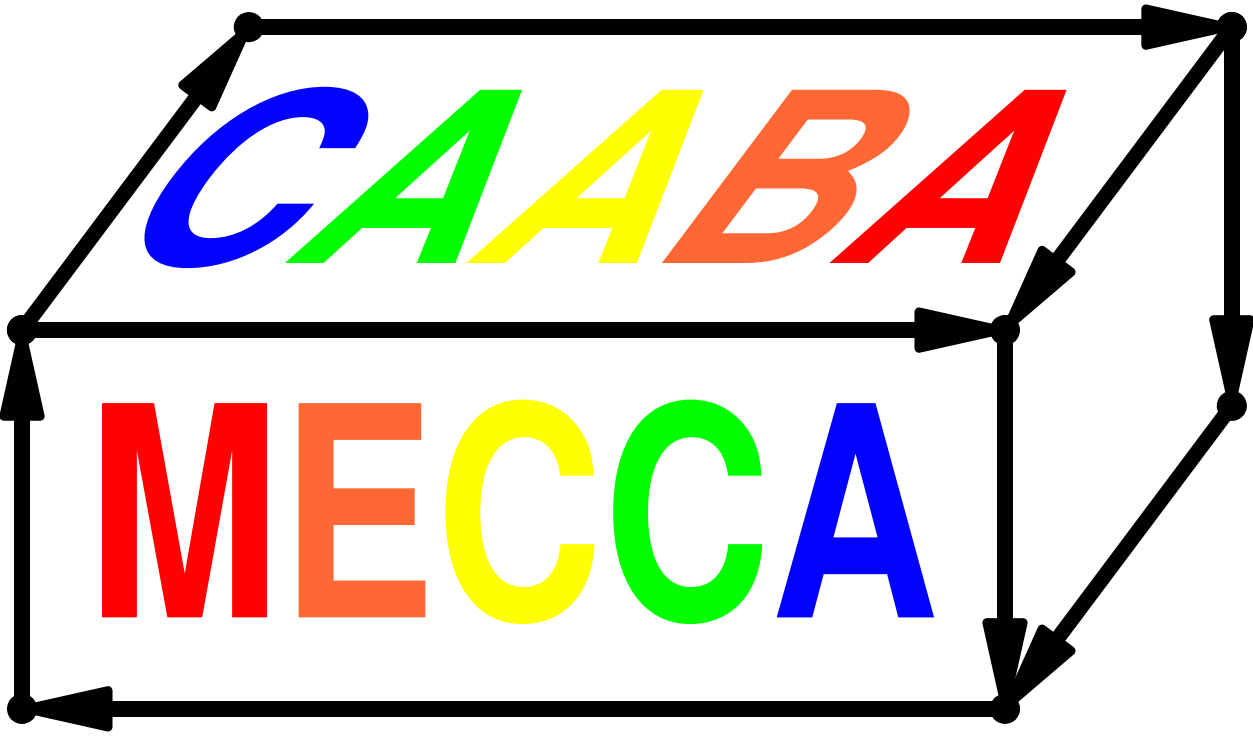

Supplement: Supplementary file 20 [file gmd-2020-337-supplement.zip › caaba_4.5.0gmdd/manual/caaba_mecca_logo_print.pdf]

## Slide: page1

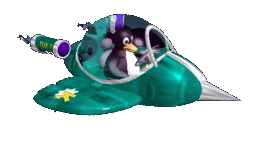

Supplement: Supplementary file 20 [file gmd-2020-337-supplement.zip › caaba_4.5.0gmdd/manual/steady_state_model.odg]

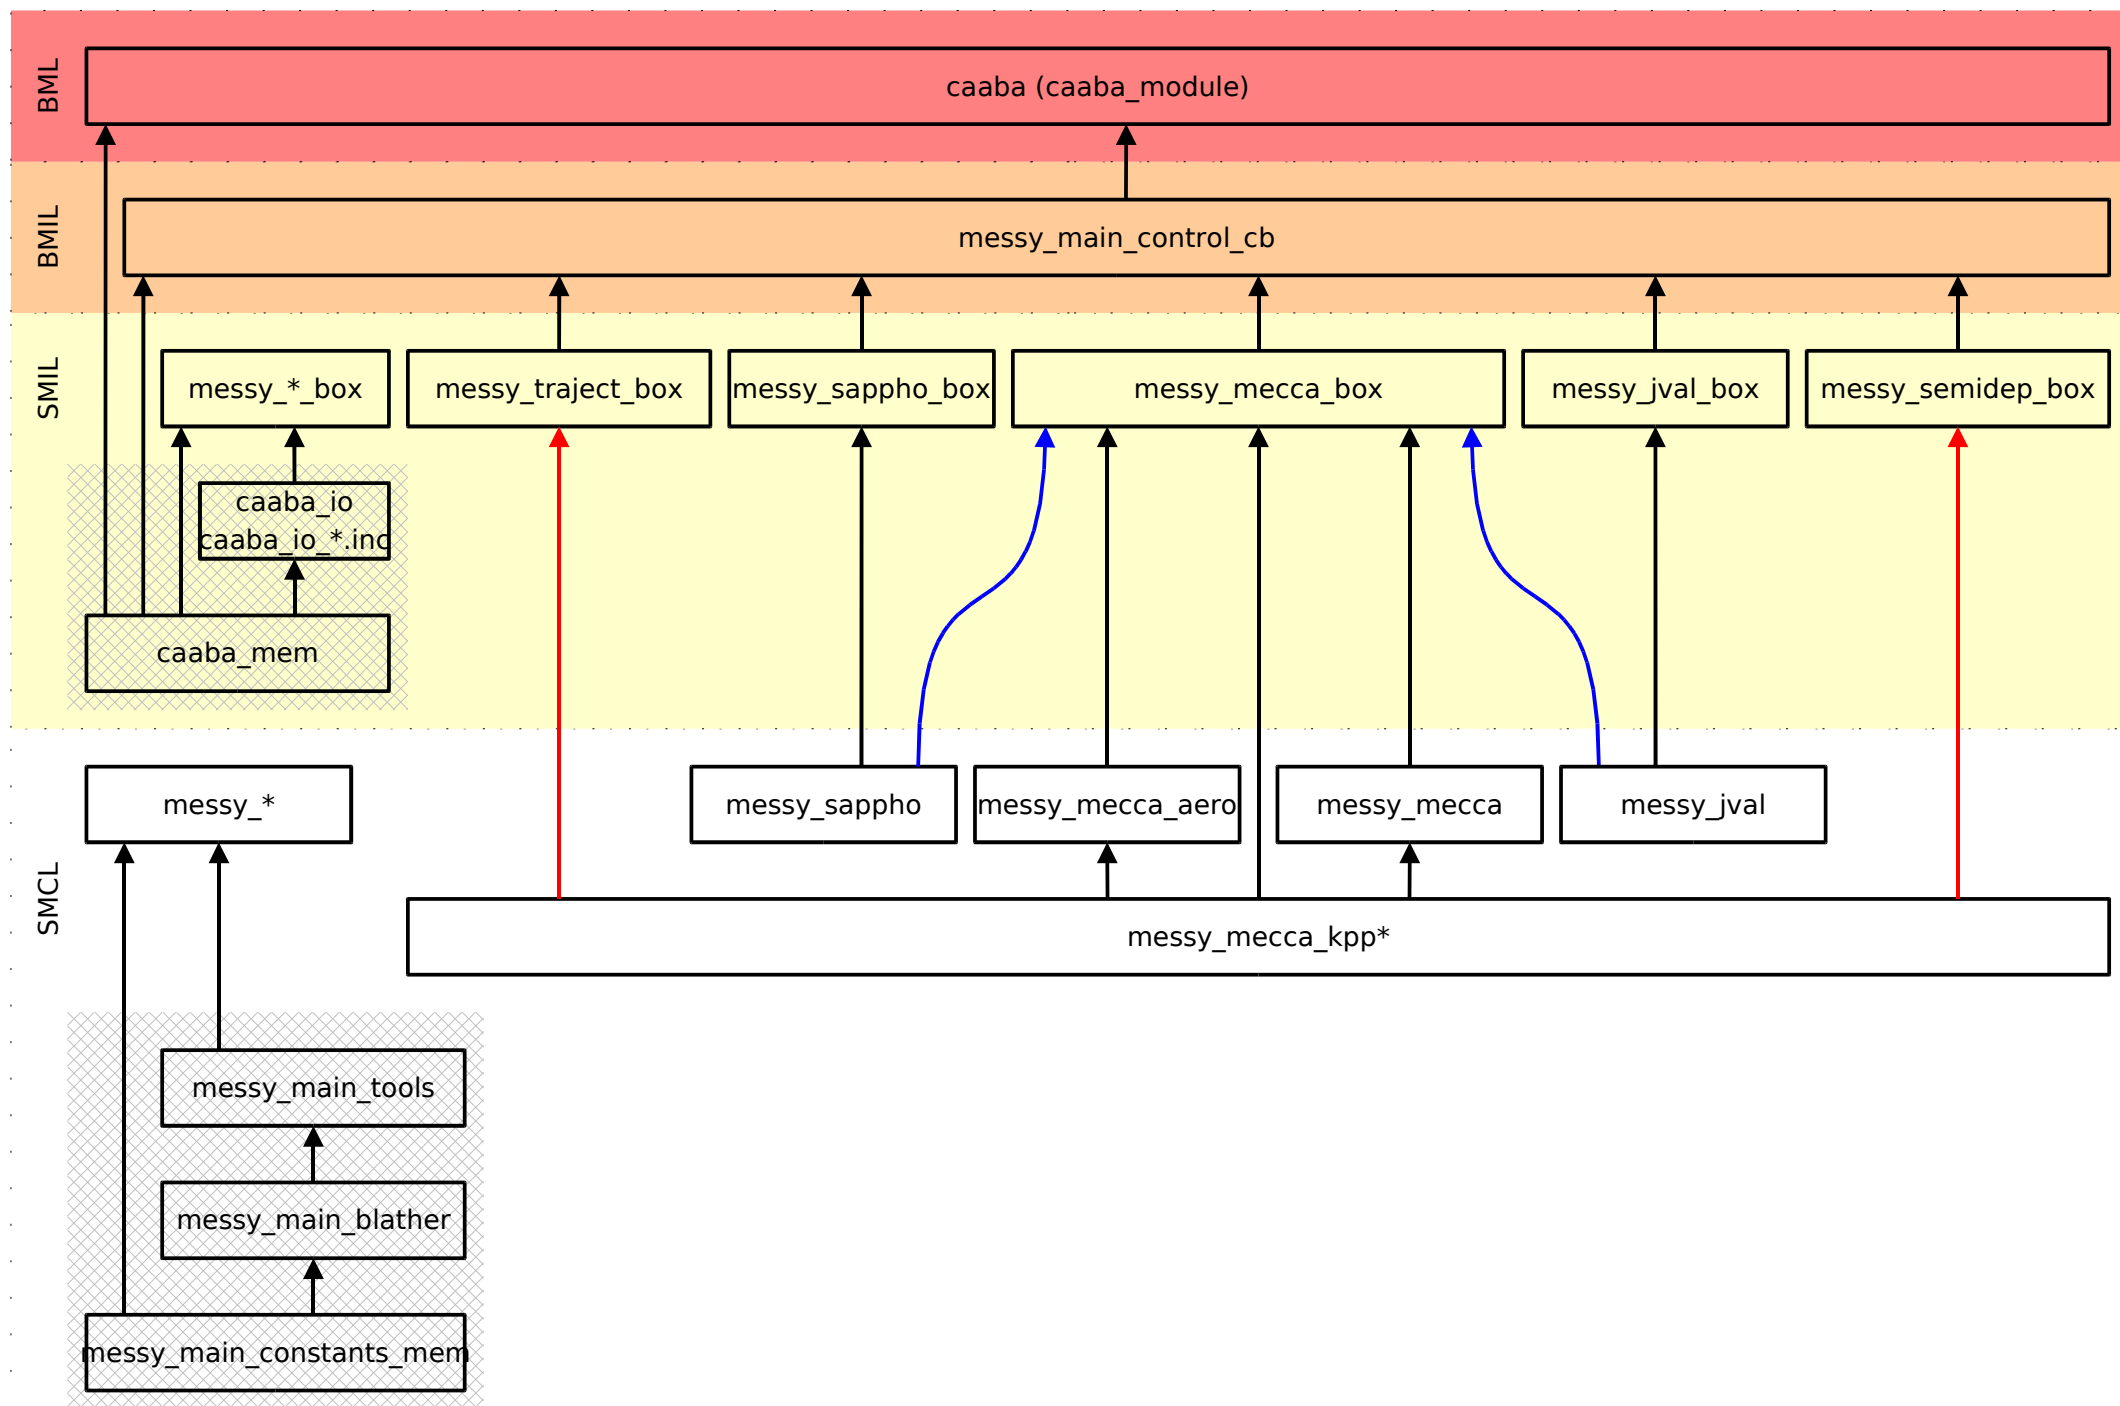

Supplement: Supplementary file 20 [file gmd-2020-337-supplement.zip › caaba_4.5.0gmdd/manual/caaba_use_diagr.pdf]

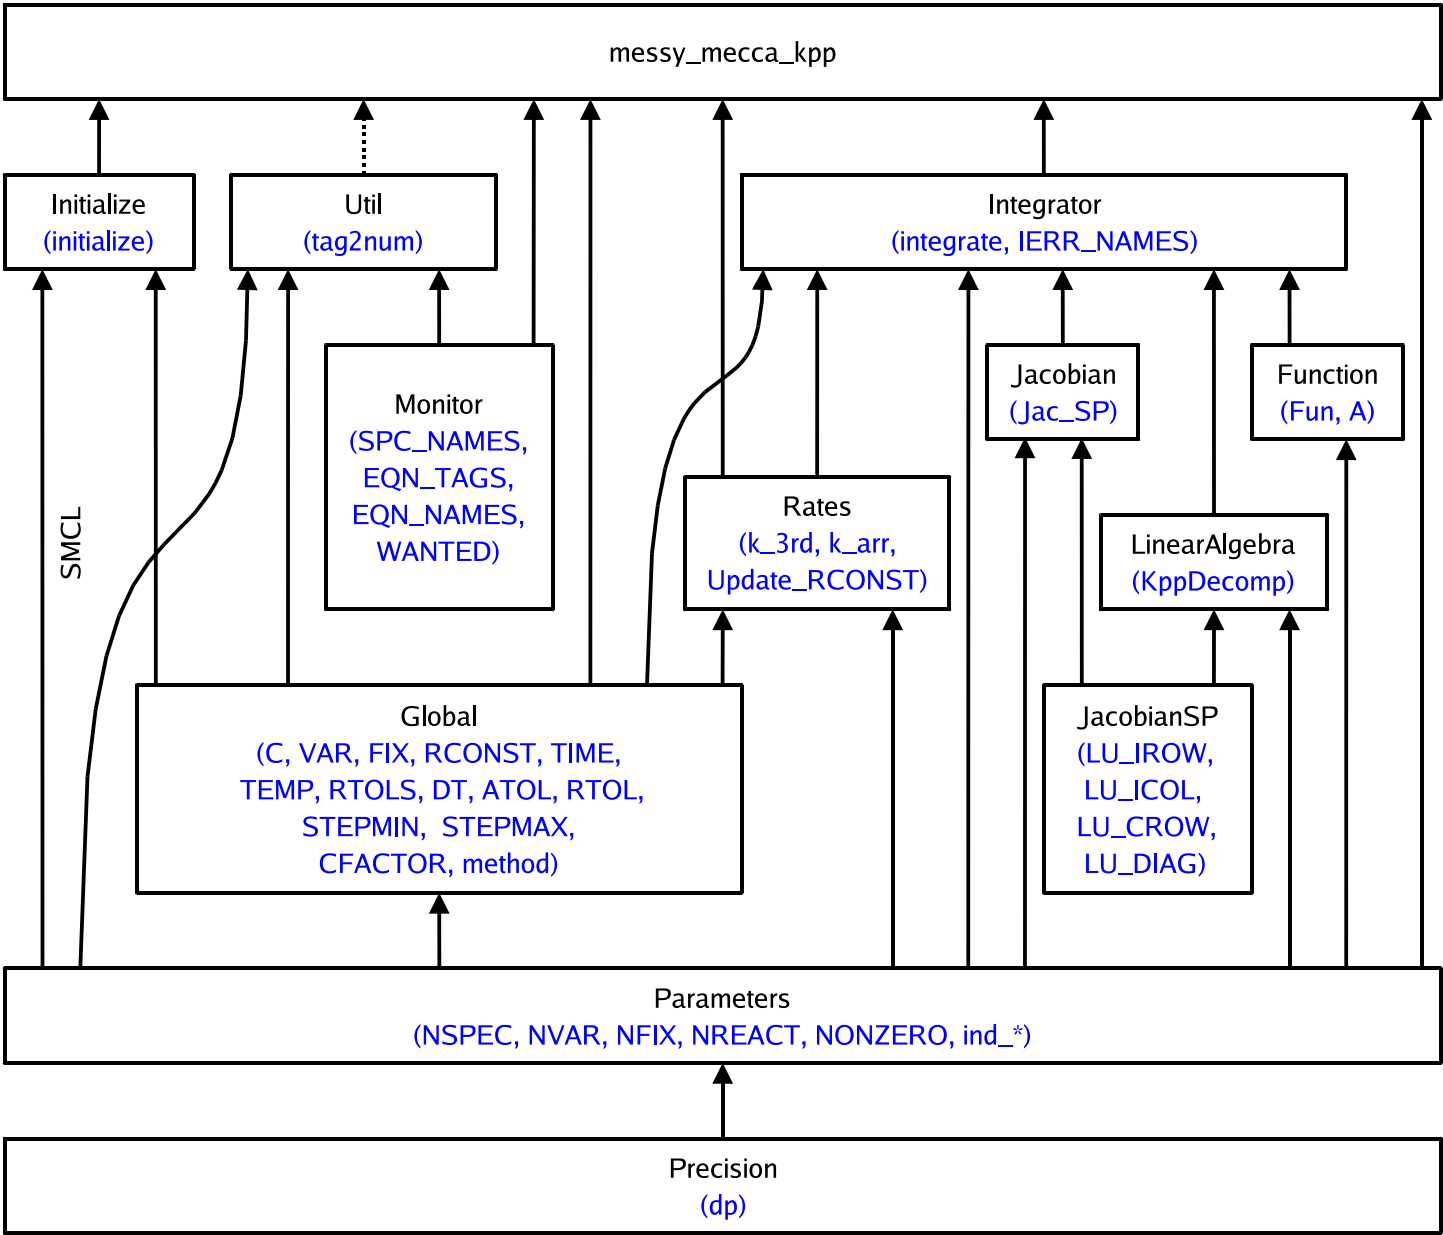

Supplement: Supplementary file 20 [file gmd-2020-337-supplement.zip › caaba_4.5.0gmdd/manual/kpp_use_diagr.pdf]

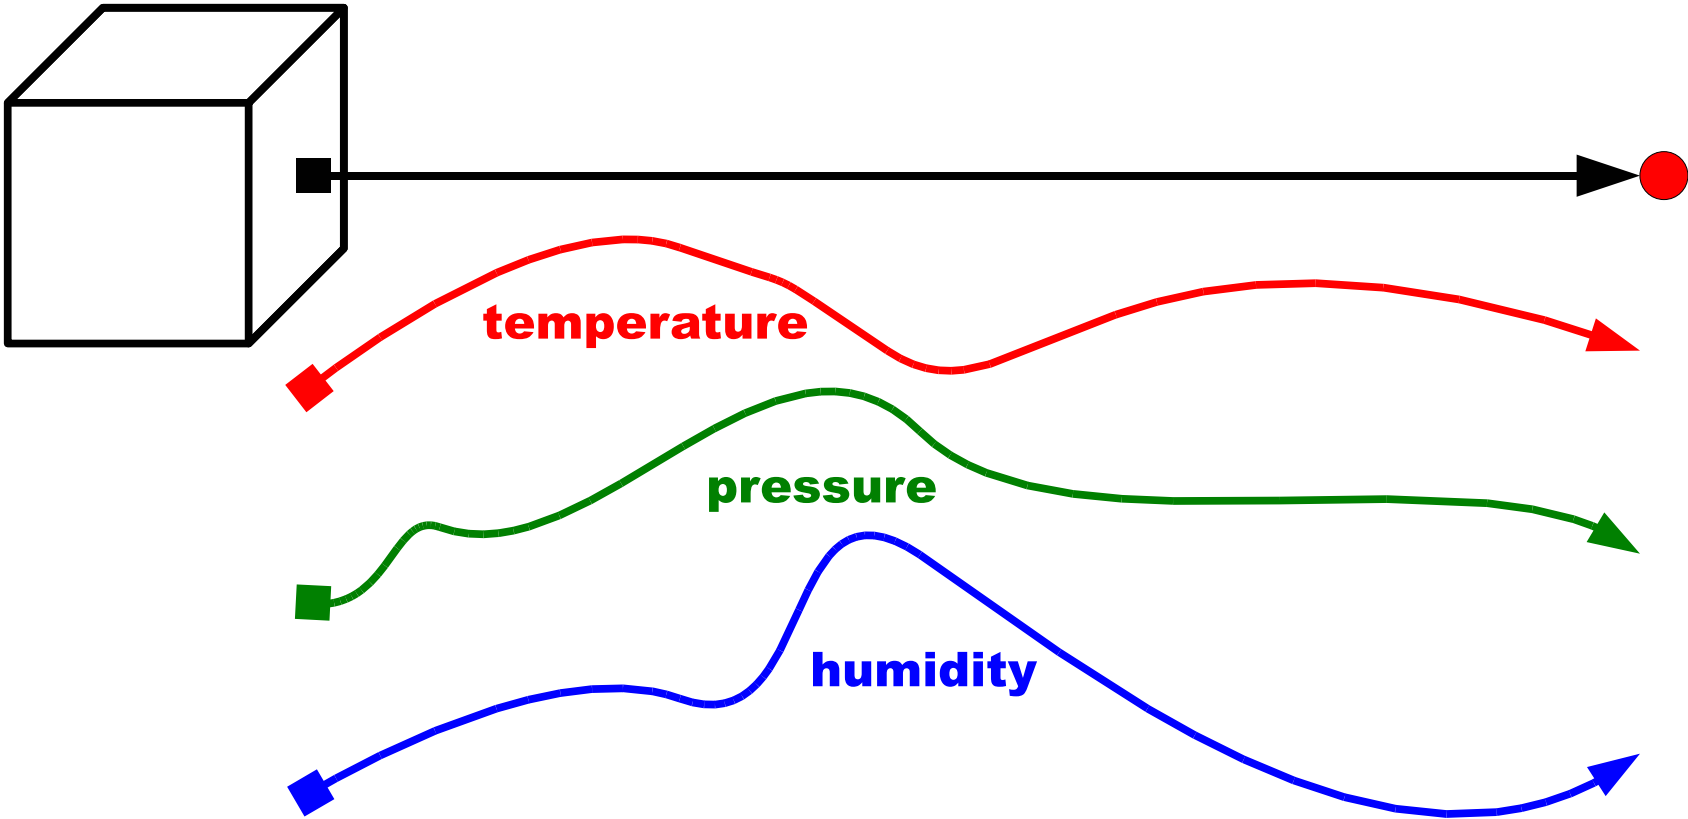

Supplement: Supplementary file 20 [file gmd-2020-337-supplement.zip › caaba_4.5.0gmdd/manual/presentation/box_model.pdf]

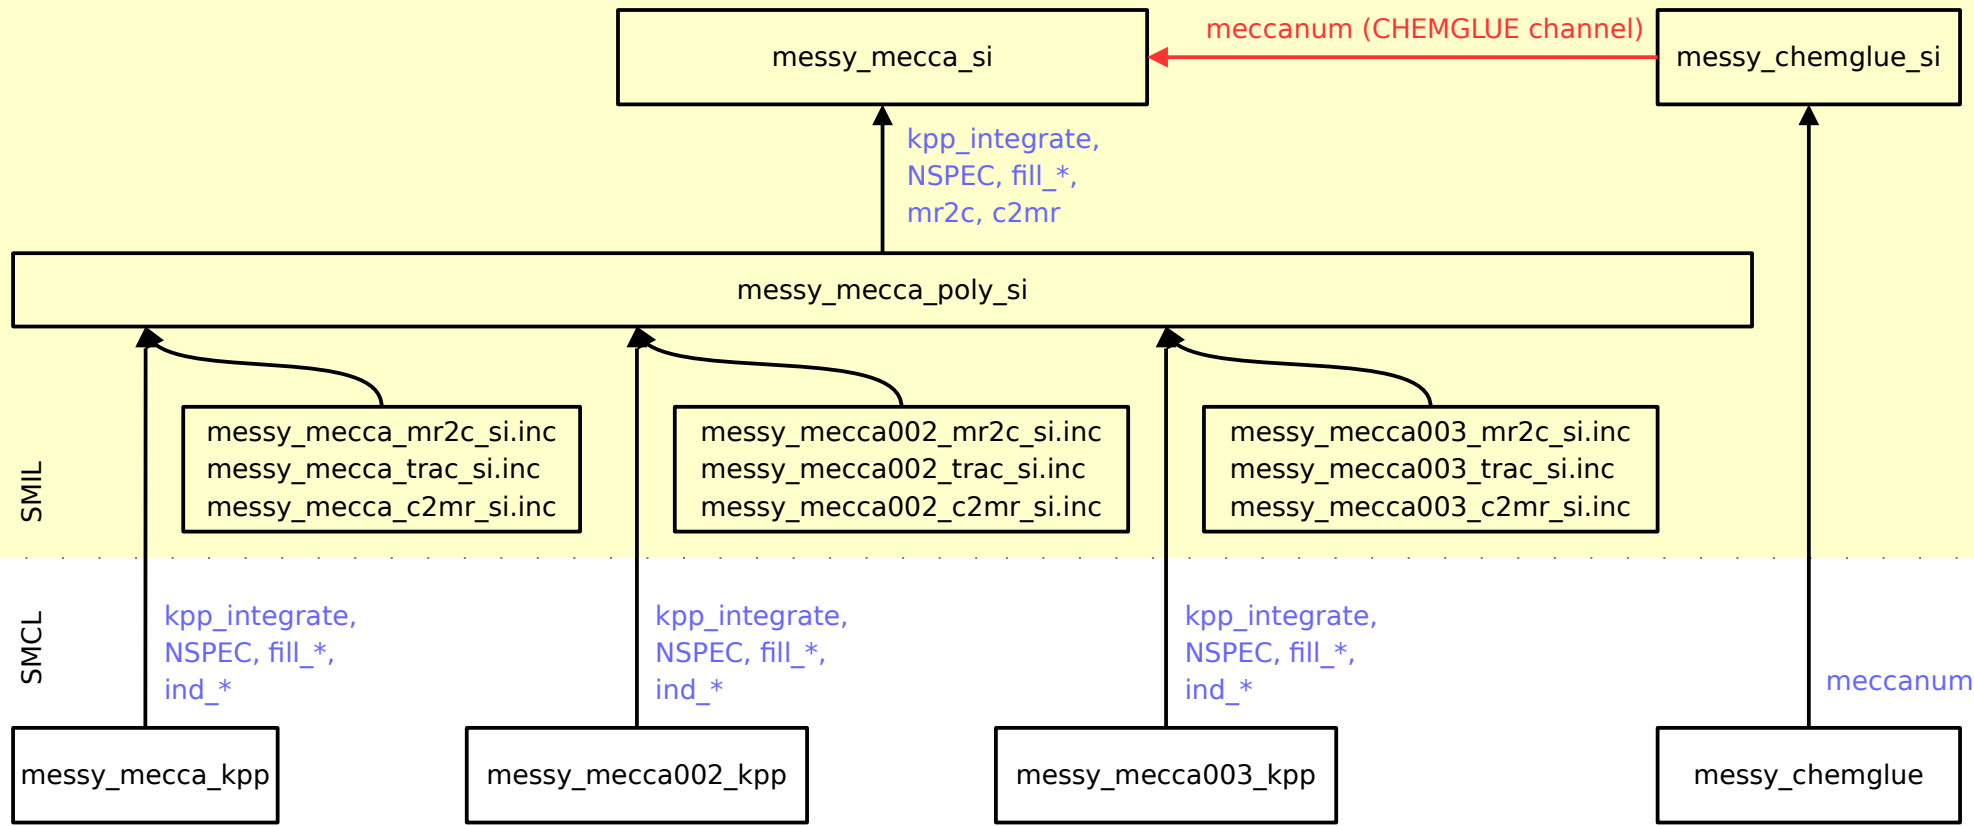

Supplement: Supplementary file 20 [file gmd-2020-337-supplement.zip › caaba_4.5.0gmdd/manual/polymecca_use_diagr.pdf]

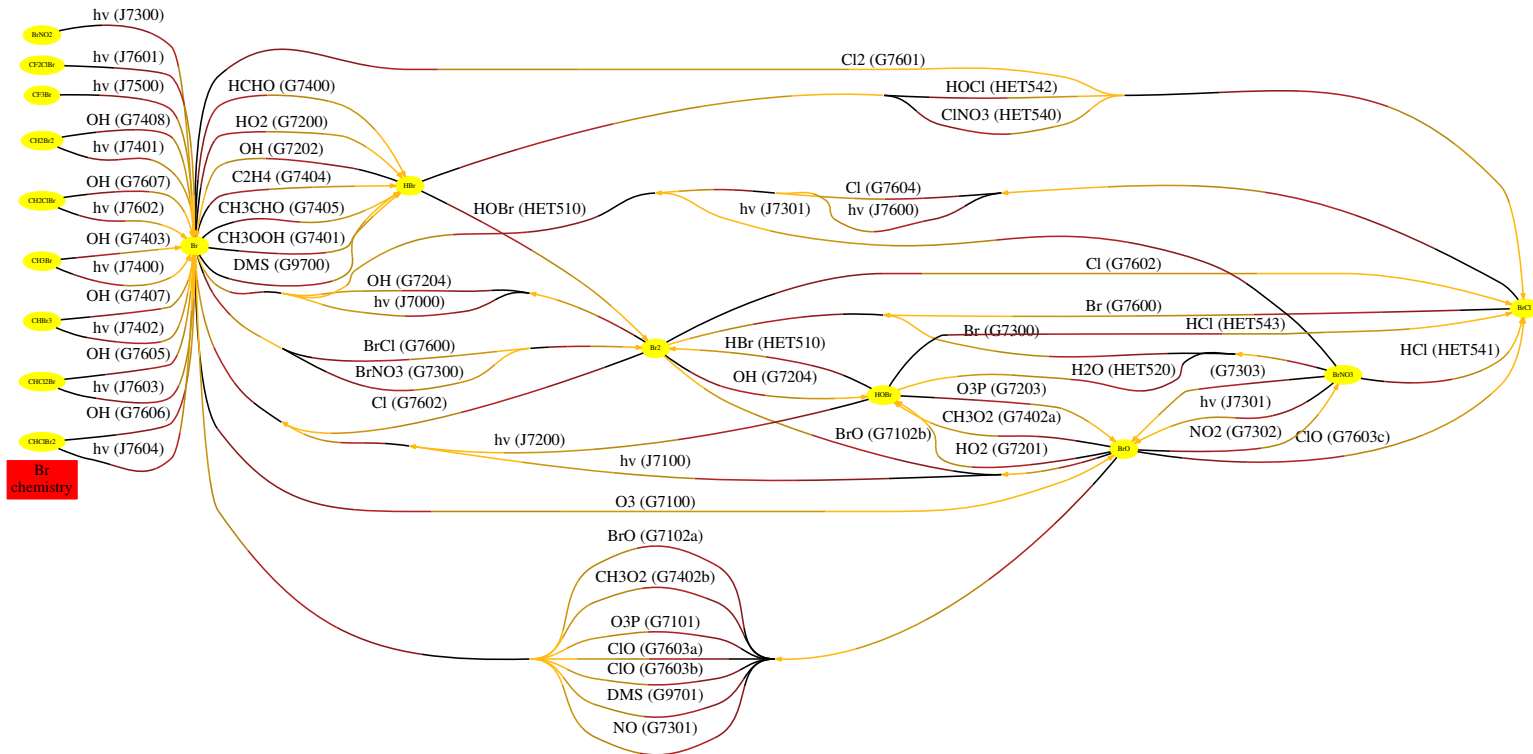

Supplement: Supplementary file 20 [file gmd-2020-337-supplement.zip › caaba_4.5.0gmdd/manual/mecca_Br.pdf]

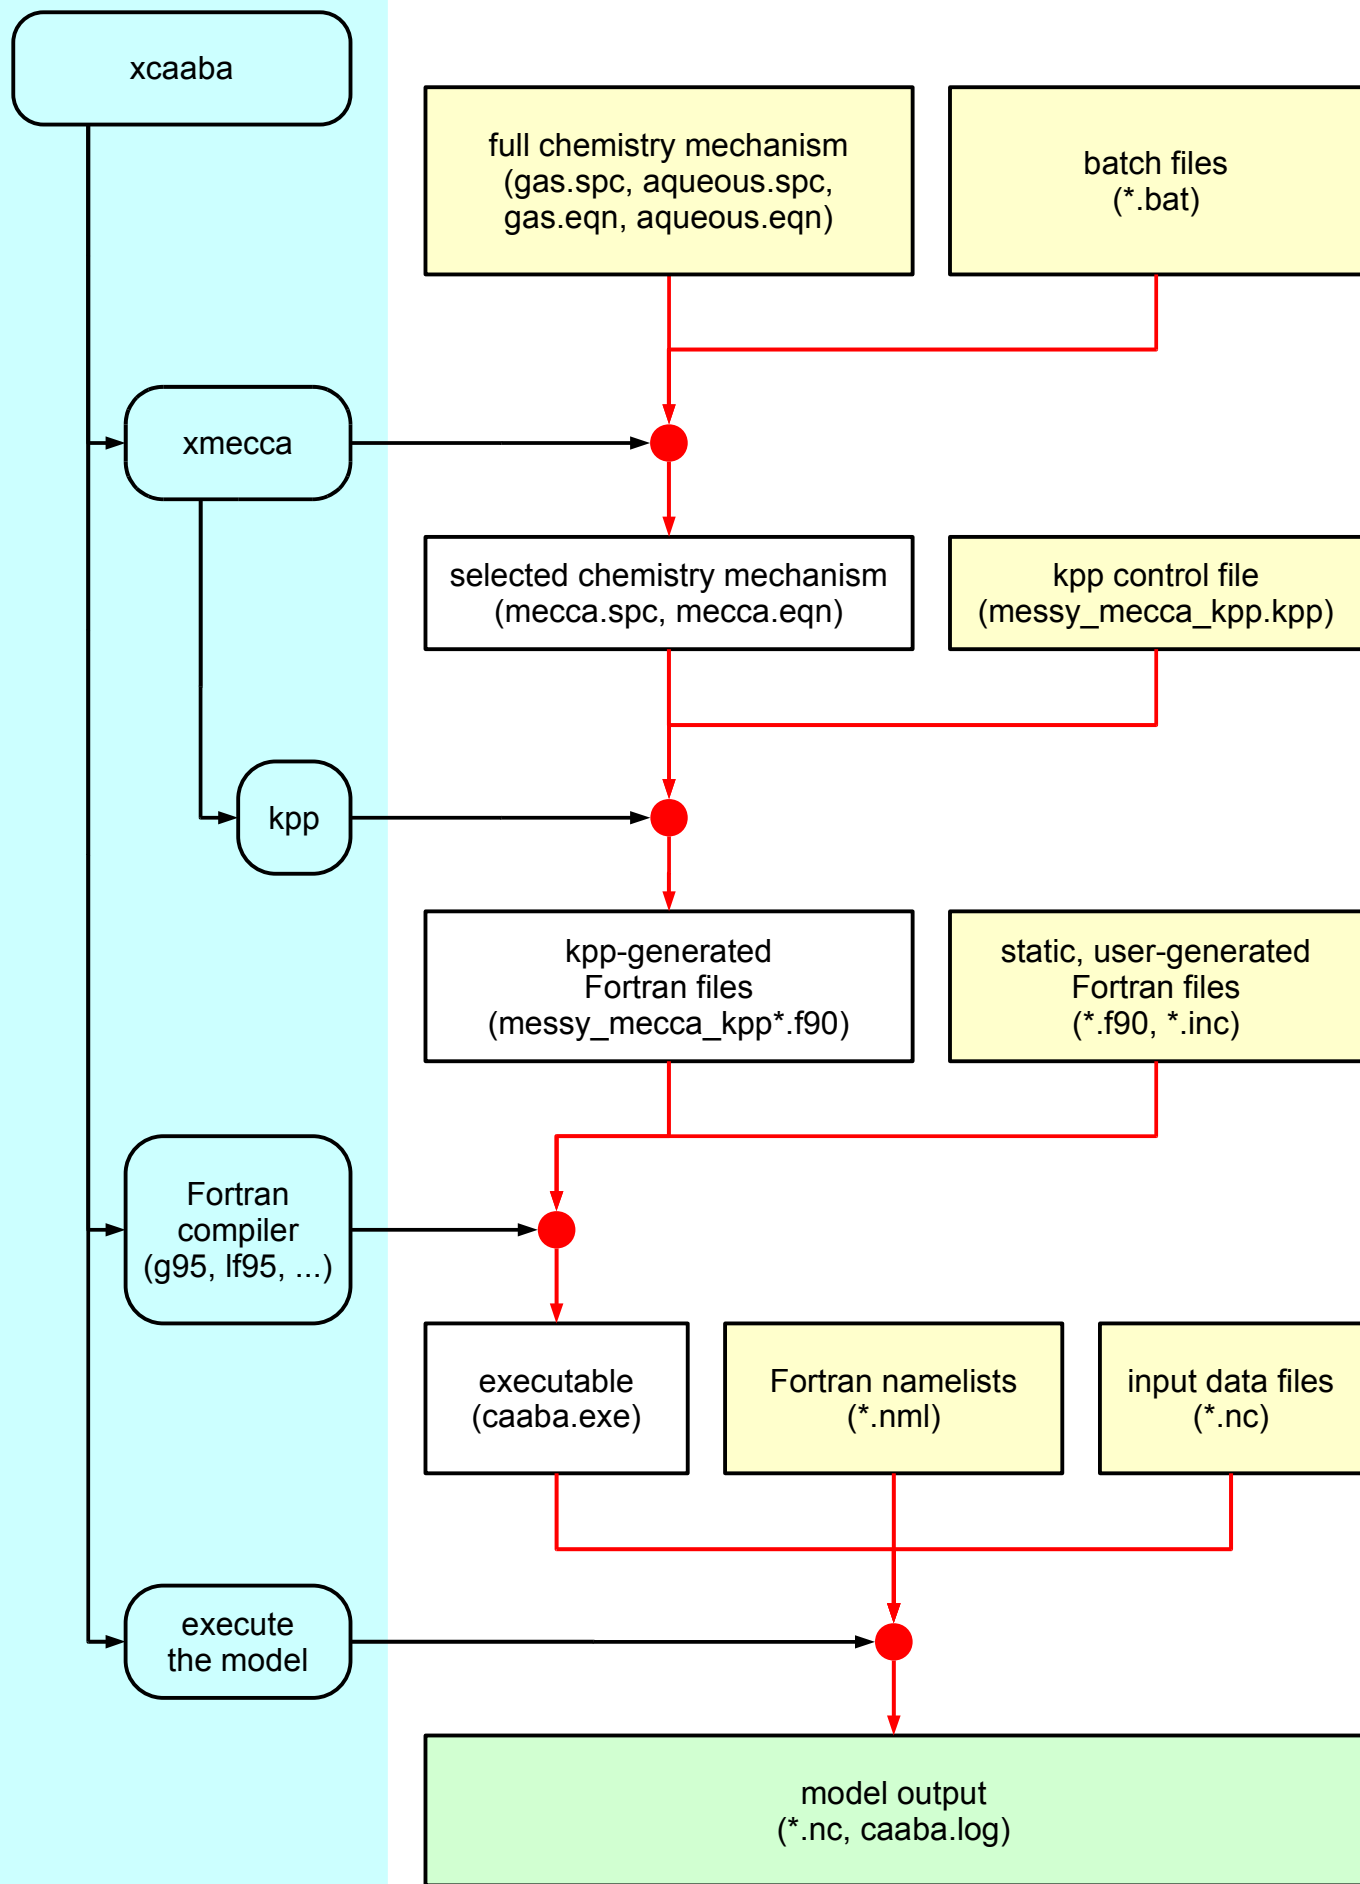

Supplement: Supplementary file 20 [file gmd-2020-337-supplement.zip › caaba_4.5.0gmdd/manual/flowcontrol_xcaaba.pdf]

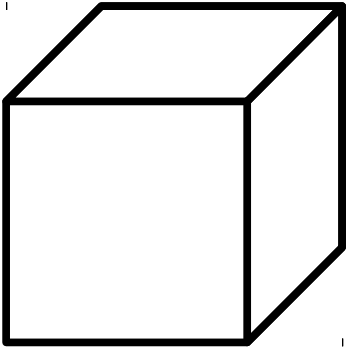

time →

temperature

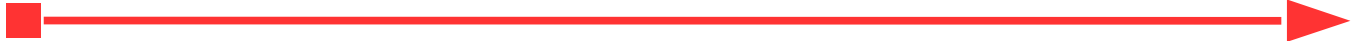

pressure

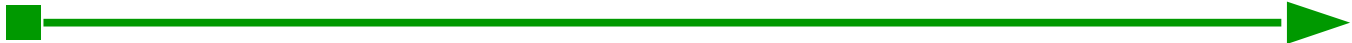

humidity

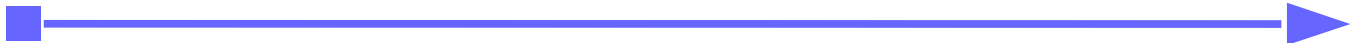

Supplement: Supplementary file 20 [file gmd-2020-337-supplement.zip › caaba_4.5.0gmdd/manual/box_model_static.pdf]

X : 0.5 to 402.8

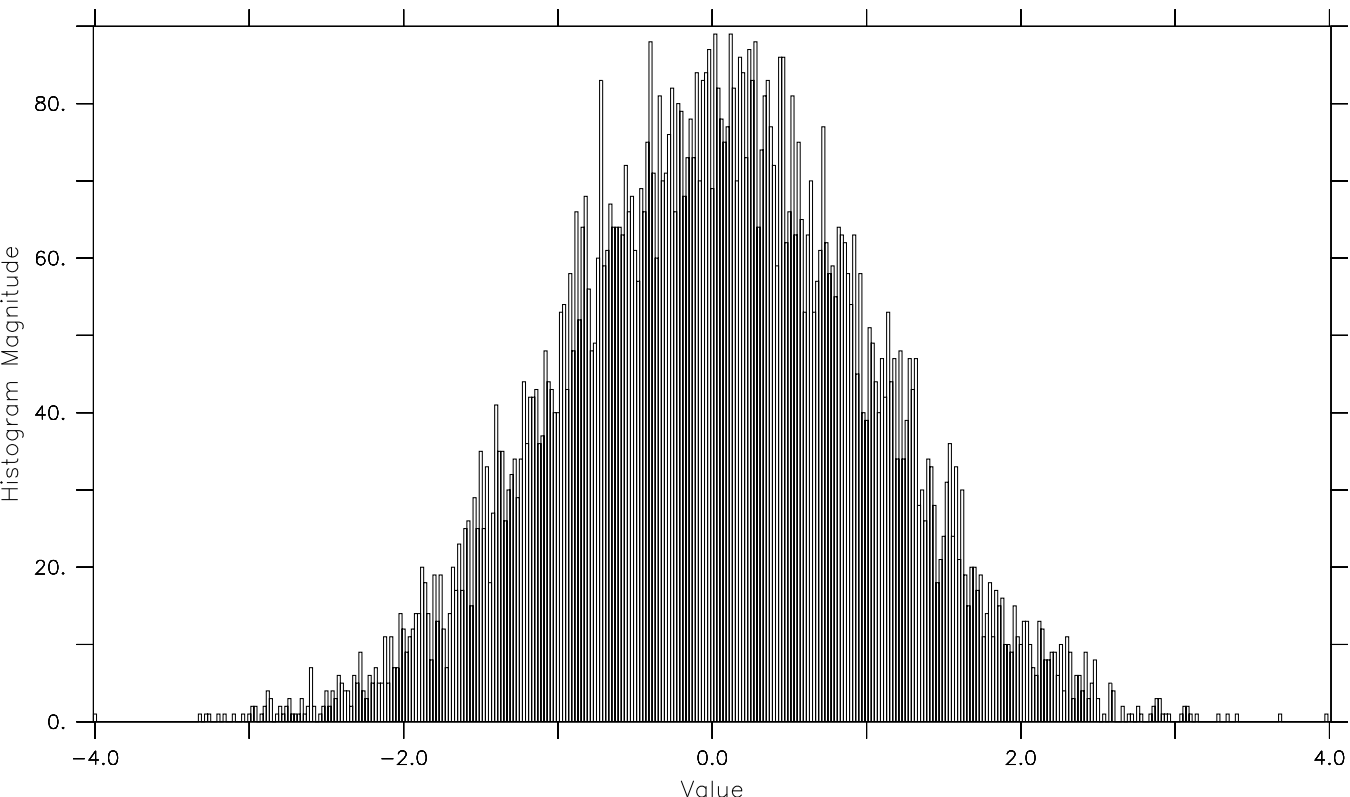

Supplement: Supplementary file 20 [file gmd-2020-337-supplement.zip › caaba_4.5.0gmdd/manual/random.pdf]

$C_5H_8$ 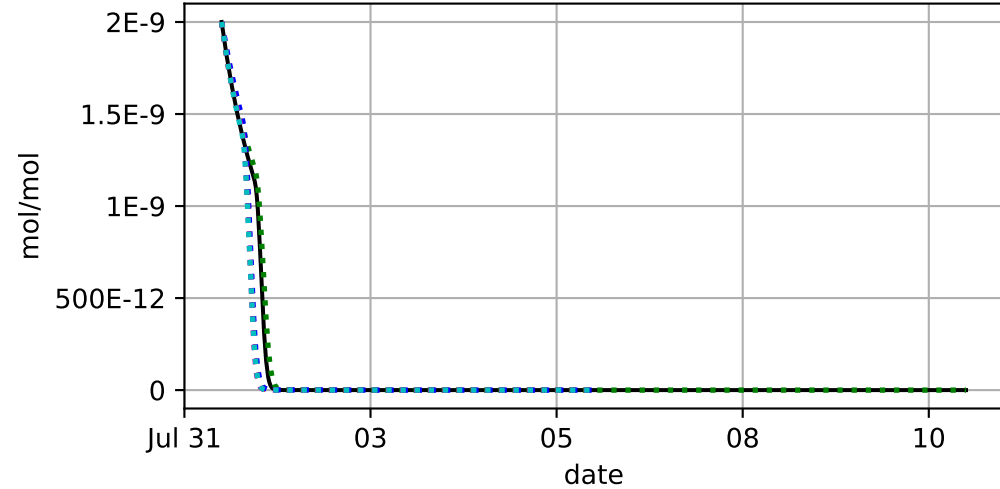

terpenes

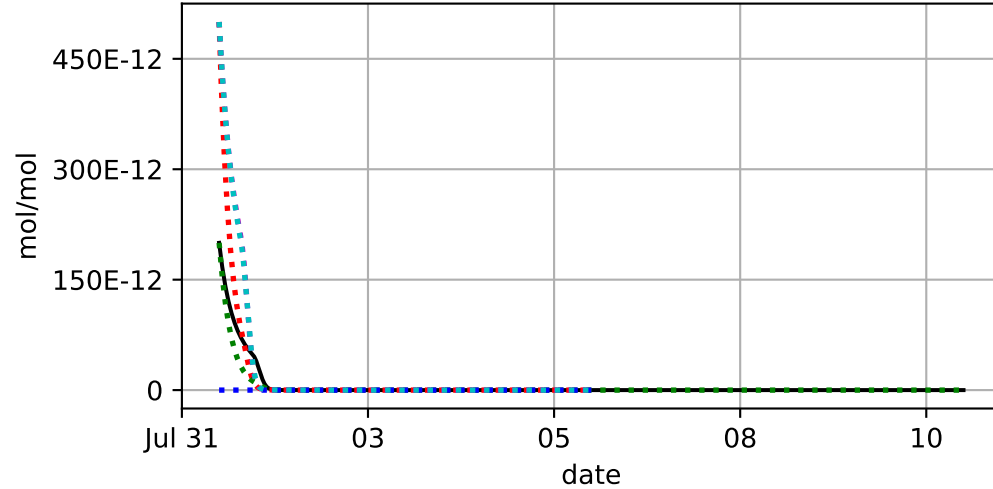

PAN

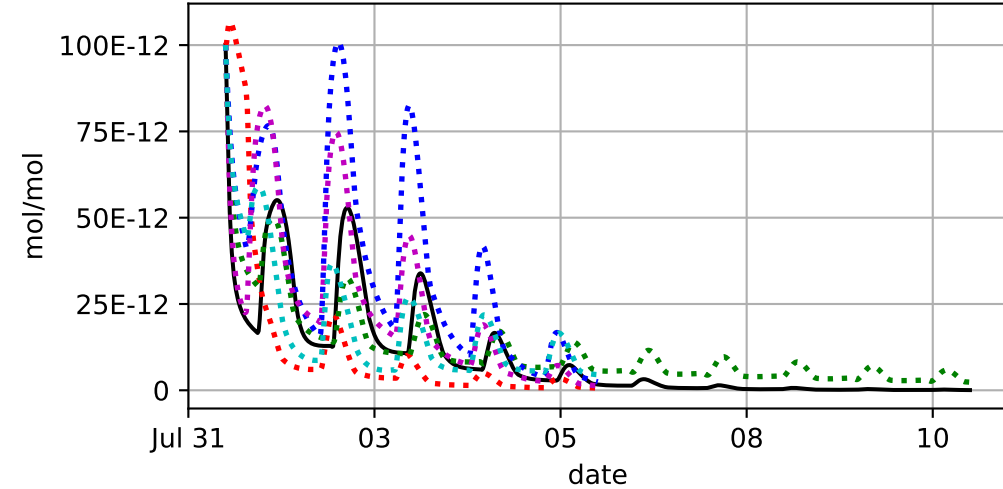 $O_3$ 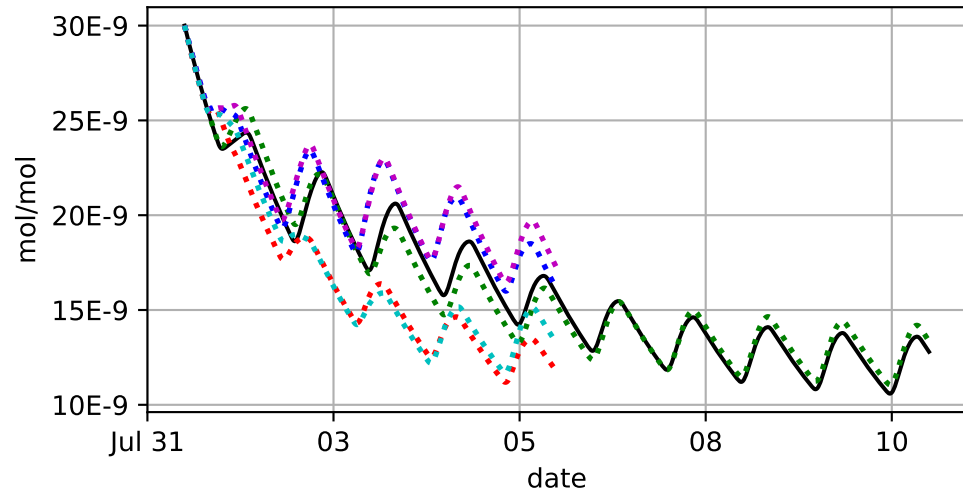

OH

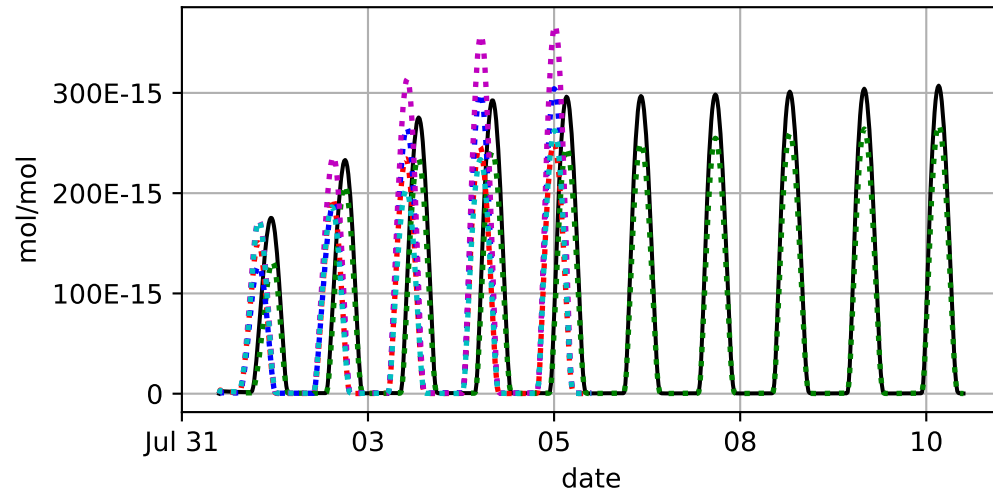 $NO_2$ 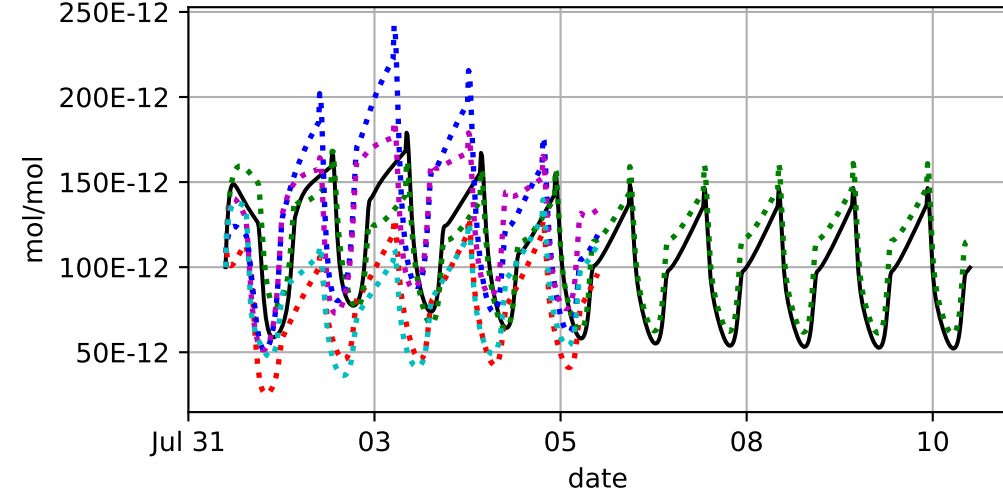

Supplement: Supplementary file 20 [file gmd-2020-337-supplement.zip › caaba_4.5.0gmdd/testsuite/cams/cams.pdf]

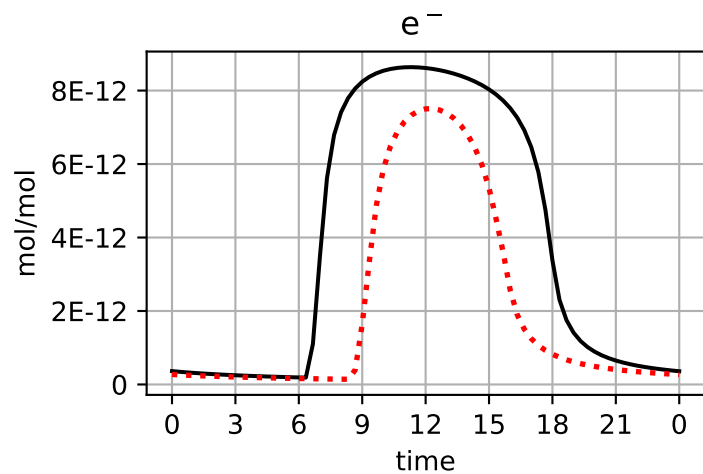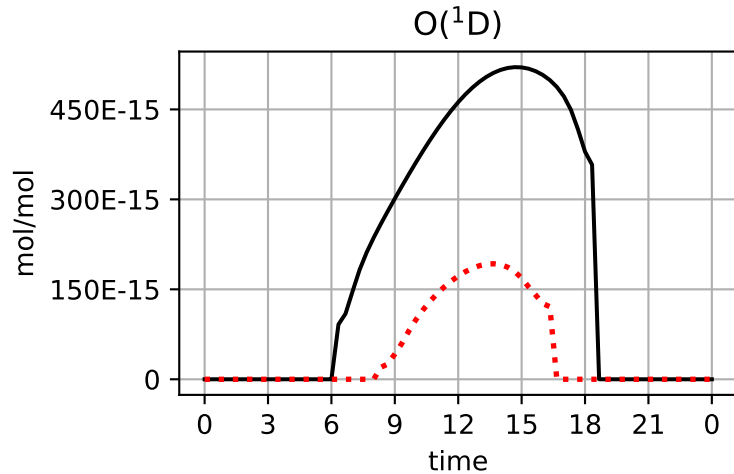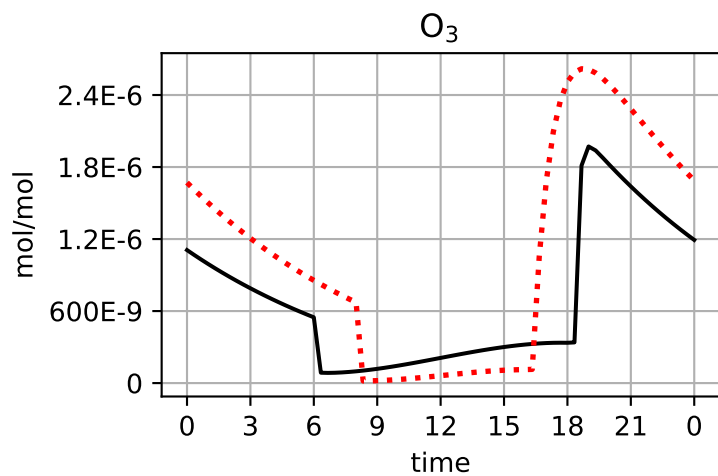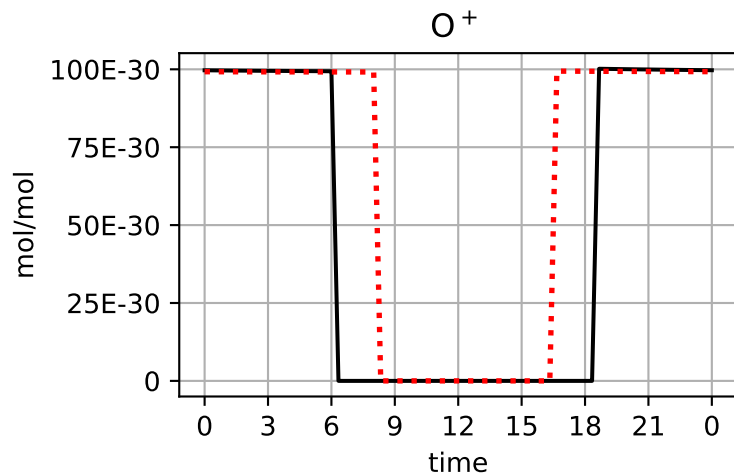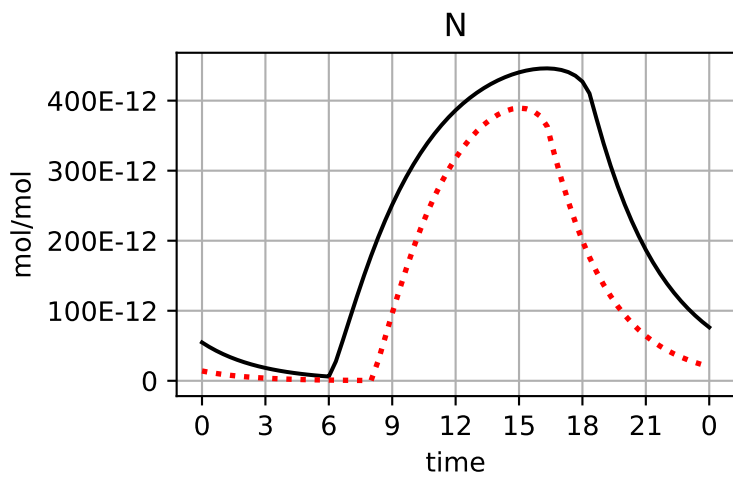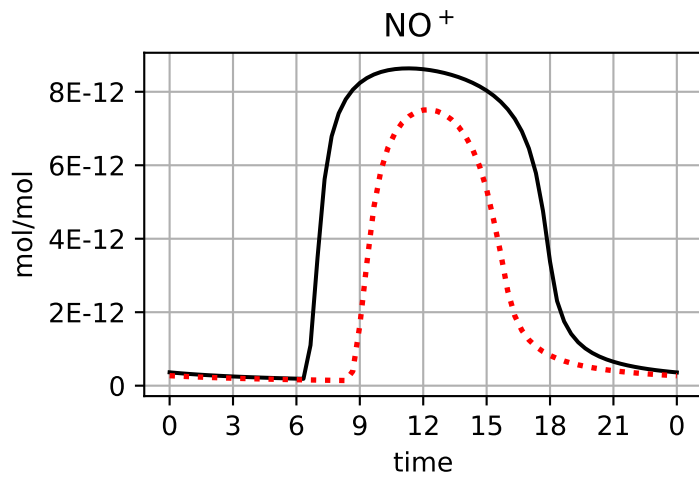

Supplement: Supplementary file 20 [file gmd-2020-337-supplement.zip › caaba_4.5.0gmdd/testsuite/radjimt.pdf]

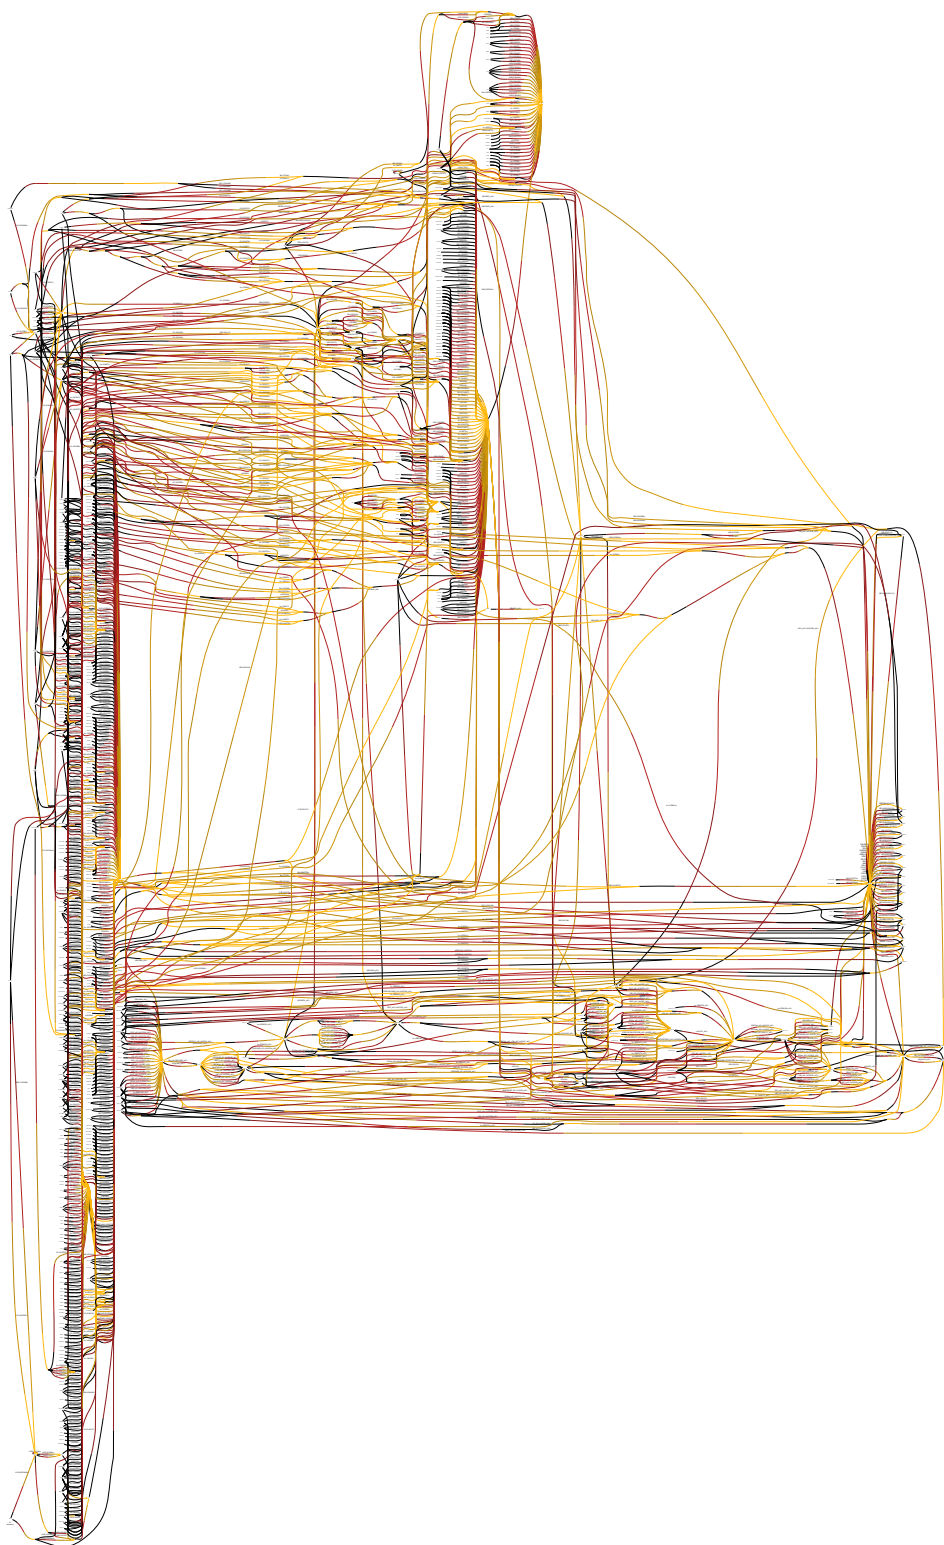

Supplement: Supplementary file 20 [file gmd-2020-337-supplement.zip › caaba_4.5.0gmdd/mecca/graphviz/mecca_C1.pdf]

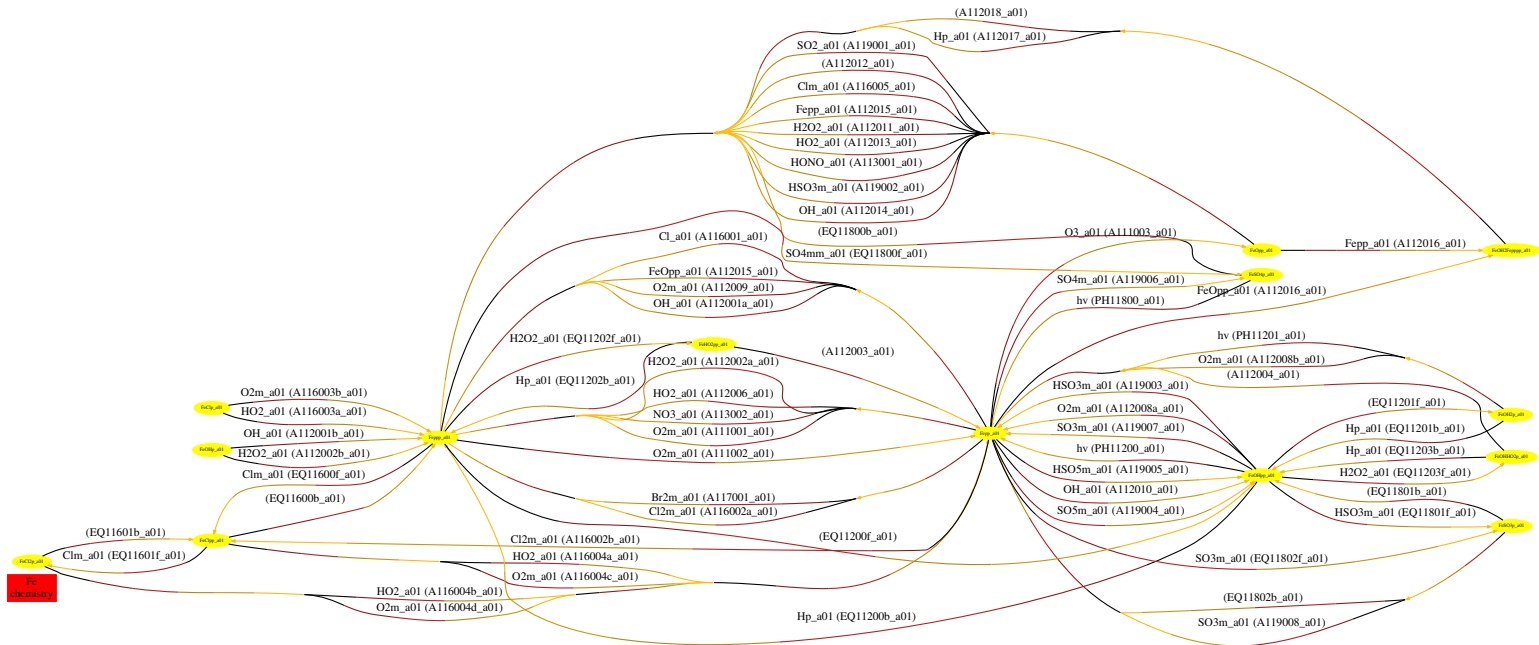

Supplement: Supplementary file 20 [file gmd-2020-337-supplement.zip › caaba_4.5.0gmdd/mecca/graphviz/mecca_Fe.pdf]

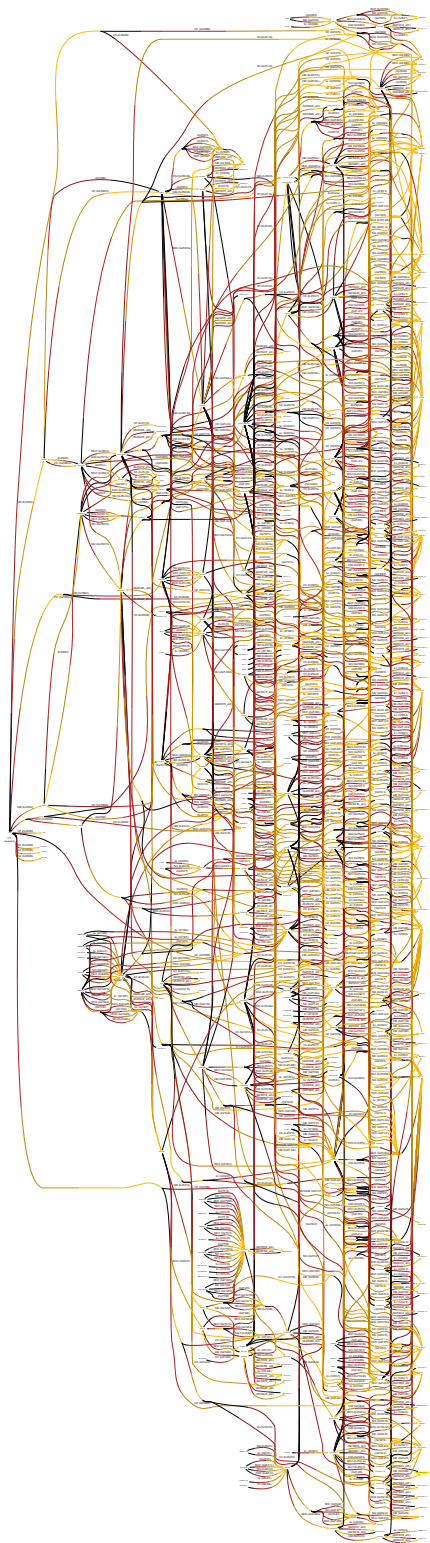

Supplement: Supplementary file 20 [file gmd-2020-337-supplement.zip › caaba_4.5.0gmdd/mecca/graphviz/mecca_C5.pdf]

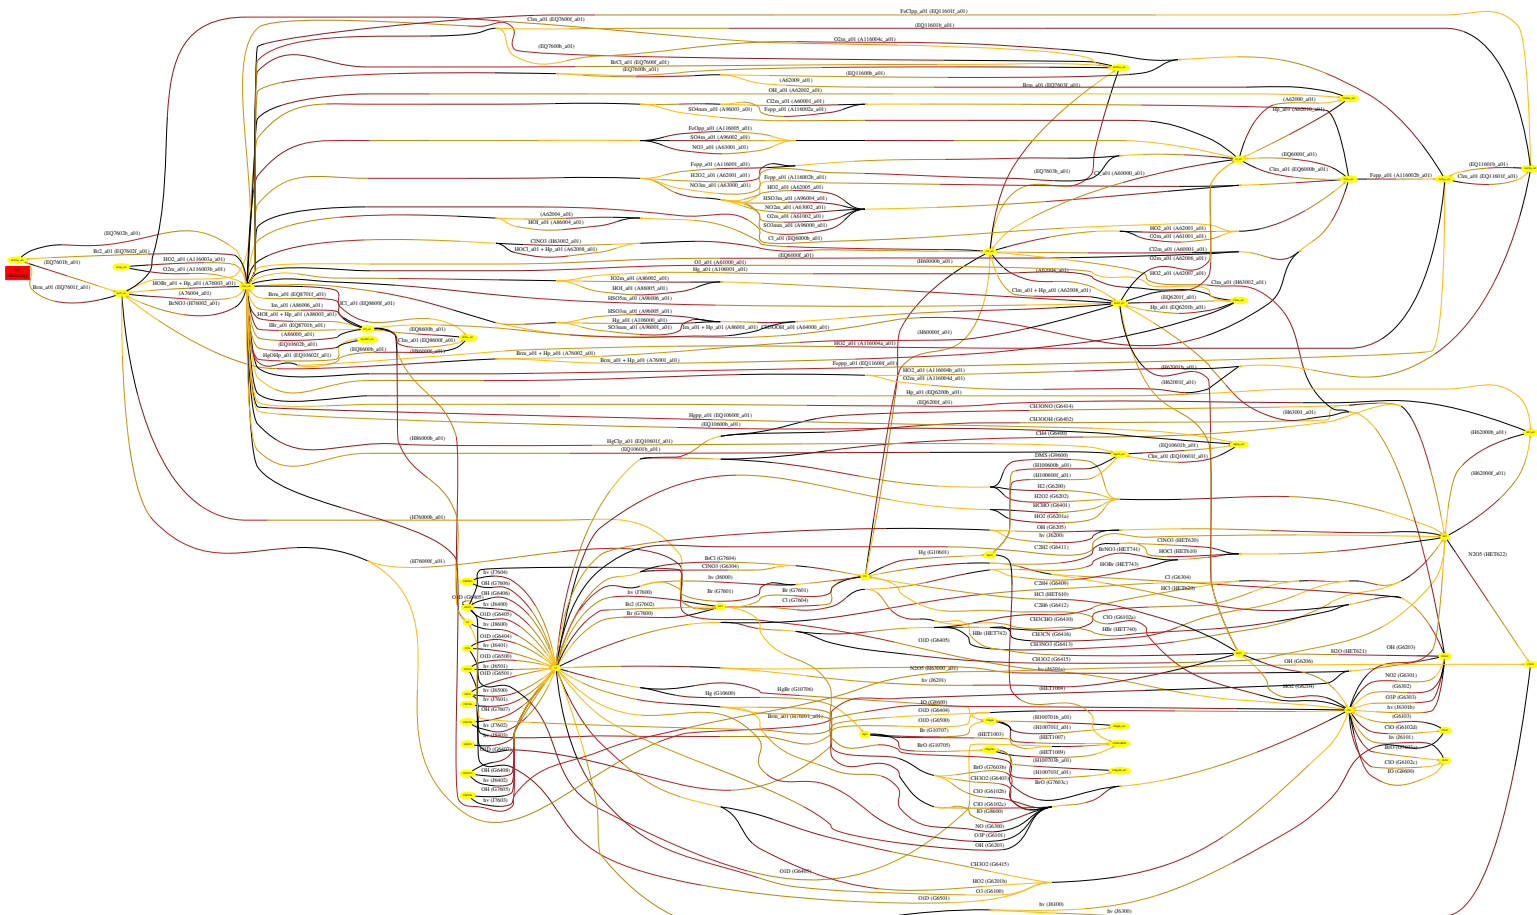

Supplement: Supplementary file 20 [file gmd-2020-337-supplement.zip › caaba_4.5.0gmdd/mecca/graphviz/mecca_Cl.pdf]

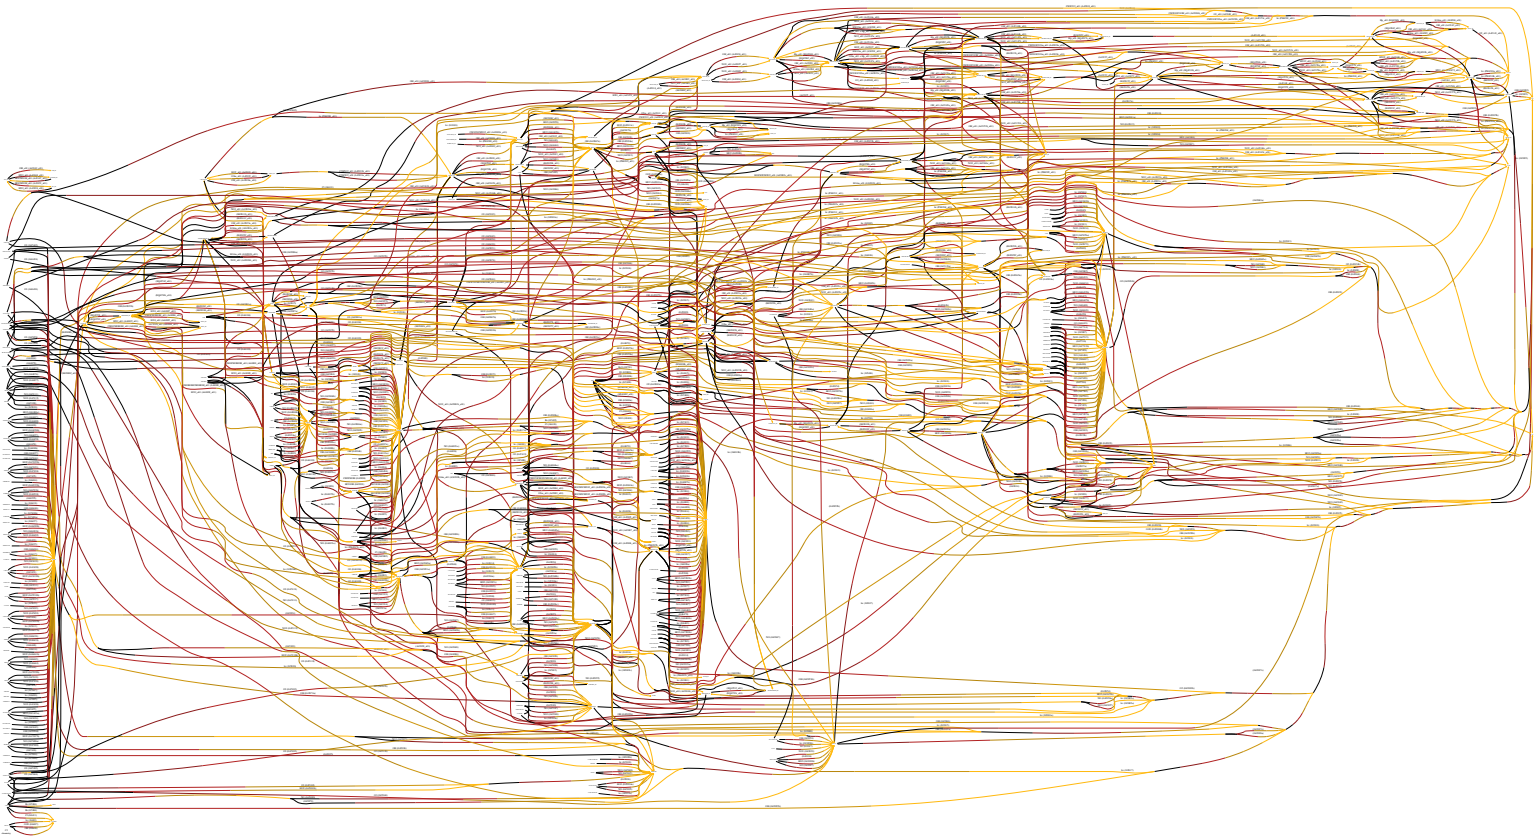

Supplement: Supplementary file 20 [file gmd-2020-337-supplement.zip › caaba_4.5.0gmdd/mecca/graphviz/mecca_C2.pdf]
